# Supplementary material for: 3D Metal–Organic Frameworks Based on Co(II) and Bithiophendicarboxylate: Synthesis, Crystal Structures, Gas Adsorption, and Magnetic Properties
Source: MDPI journal article supplement (doi:10.3390/molecules26051269), 2021-02-26

# checkCIF/PLATON report

Structure factors have been supplied for datablock(s) pz-2\_sq

THIS REPORT IS FOR GUIDANCE ONLY. IF USED AS PART OF A REVIEW PROCEDURE FOR PUBLICATION, IT SHOULD NOT REPLACE THE EXPERTISE OF AN EXPERIENCED CRYSTALLOGRAPHIC REFEREE.

No syntax errors found.      CIF dictionary      Interpreting this report

## Datablock: pz-2\_sq

---

Bond precision:    C-C = 0.0087 Å                      Wavelength=0.79313

Cell:                      a=11.96(2)              b=25.867(8)              c=11.461(16)  
                            alpha=90              beta=106.49(3)              gamma=90  
Temperature:              100 K

|                        | Calculated                        | Reported              |
|------------------------|-----------------------------------|-----------------------|
| Volume                 | 3400(7)                           | 3400(8)               |
| Space group            | P 21/c                            | P 21/c                |
| Hall group             | -P 2ybc                           | -P 2ybc               |
| Moiety formula         | C42 H40 Co3 N4 O16 S6 [+ solvent] | ?                     |
| Sum formula            | C42 H40 Co3 N4 O16 S6 [+ solvent] | C48 H58 Co3 N6 O20 S6 |
| Mr                     | 1225.93                           | 1408.15               |
| Dx, g cm <sup>-3</sup> | 1.198                             | 1.376                 |
| Z                      | 2                                 | 2                     |
| Mu (mm <sup>-1</sup> ) | 1.290                             | 1.309                 |
| F000                   | 1250.0                            | 1450.0                |
| F000'                  | 1254.55                           |                       |
| h,k,lmax               | 16,34,15                          | 14,33,15              |
| Nref                   | 8800                              | 7481                  |
| Tmin,Tmax              | 0.937,0.974                       | 0.716,1.000           |
| Tmin'                  | 0.937                             |                       |

Correction method= # Reported T Limits: Tmin=0.716 Tmax=1.000  
AbsCorr = MULTI-SCAN

Data completeness= 0.850                      Theta(max)= 32.413

R(reflections)= 0.0762( 4702)              wR2(reflections)= 0.2365( 7481)

S = 1.044                      Npar= 401

---

The following ALERTS were generated. Each ALERT has the format

**test-name\_ALERT\_alert-type\_alert-level.**

Click on the hyperlinks for more details of the test.

### Alert level C

|                   |                                                  |                                         |         |        |
|-------------------|--------------------------------------------------|-----------------------------------------|---------|--------|
| PLAT029_ALERT_3_C | _diffn_measured_fraction_theta_full              | value Low .                             | 0.960   | Why?   |
| PLAT148_ALERT_3_C | s.u. on the                                      | a - Axis is (Too) Large ....            | 0.020   | Ang.   |
| PLAT148_ALERT_3_C | s.u. on the                                      | c - Axis is (Too) Large ....            | 0.016   | Ang.   |
| PLAT220_ALERT_2_C | NonSolvent Resd 1                                | C Ueq(max) / Ueq(min) Range             | 3.3     | Ratio  |
| PLAT241_ALERT_2_C | High                                             | MainMol Ueq as Compared to Neighbors of | 021     | Check  |
| PLAT242_ALERT_2_C | Low                                              | MainMol Ueq as Compared to Neighbors of | Co1     | Check  |
| PLAT341_ALERT_3_C | Low Bond Precision on                            | C-C Bonds .....                         | 0.00873 | Ang.   |
| PLAT906_ALERT_3_C | Large K Value in the Analysis of Variance .....  |                                         | 3.976   | Check  |
| PLAT911_ALERT_3_C | Missing FCF Refl Between Thmin & STh/L=          | 0.600                                   | 239     | Report |
| PLAT913_ALERT_3_C | Missing # of Very Strong Reflections in FCF .... |                                         | 5       | Note   |
| PLAT978_ALERT_2_C | Number C-C Bonds with Positive Residual Density. |                                         | 0       | Info   |

### Alert level G

FORMU01\_ALERT\_2\_G There is a discrepancy between the atom counts in the  
\_chemical\_formula\_sum and the formula from the \_atom\_site\* data.

Atom count from \_chemical\_formula\_sum: C48 H58 Co3 N6 O20 S6

Atom count from the \_atom\_site data: C42 H40 Co3 N4 O16 S6

ABSMU01\_ALERT\_1\_G Calculation of \_exptl\_absorpt\_correction\_mu  
not performed for this radiation type.

CELLZ01\_ALERT\_1\_G Difference between formula and atom\_site contents detected.

CELLZ01\_ALERT\_1\_G ALERT: Large difference may be due to a

symmetry error - see SYMMG tests

From the CIF: \_cell\_formula\_units\_Z 2

From the CIF: \_chemical\_formula\_sum C48 H58 Co3 N6 O20 S6

TEST: Compare cell contents of formula and atom\_site data

| atom | Z*formula | cif sites | diff  |
|------|-----------|-----------|-------|
| C    | 96.00     | 84.00     | 12.00 |
| H    | 116.00    | 80.00     | 36.00 |
| Co   | 6.00      | 6.00      | 0.00  |
| N    | 12.00     | 8.00      | 4.00  |
| O    | 40.00     | 32.00     | 8.00  |
| S    | 12.00     | 12.00     | 0.00  |

|                   |                                                    |         |              |
|-------------------|----------------------------------------------------|---------|--------------|
| PLAT002_ALERT_2_G | Number of Distance or Angle Restraints on AtSite   | 19      | Note         |
| PLAT003_ALERT_2_G | Number of Uiso or Uij Restrained non-H Atoms ...   | 23      | Report       |
| PLAT004_ALERT_5_G | Polymeric Structure Found with Maximum Dimension   | 3       | Info         |
| PLAT041_ALERT_1_G | Calc. and Reported SumFormula Strings Differ       |         | Please Check |
| PLAT068_ALERT_1_G | Reported F000 Differs from Calcd (or Missing)...   |         | Please Check |
| PLAT072_ALERT_2_G | SHELXL First Parameter in WGHT Unusually Large     | 0.15    | Report       |
| PLAT092_ALERT_4_G | Check: Wavelength Given is not Cu,Ga,Mo,Ag,In Ka   | 0.79313 | Ang.         |
| PLAT174_ALERT_4_G | The CIF-Embedded .res File Contains FLAT Records   | 4       | Report       |
| PLAT176_ALERT_4_G | The CIF-Embedded .res File Contains SADI Records   | 8       | Report       |
| PLAT178_ALERT_4_G | The CIF-Embedded .res File Contains SIMU Records   | 3       | Report       |
| PLAT186_ALERT_4_G | The CIF-Embedded .res File Contains ISOR Records   | 1       | Report       |
| PLAT301_ALERT_3_G | Main Residue Disorder .....(Resd 1 )               | 22%     | Note         |
| PLAT413_ALERT_2_G | Short Inter XH3 .. XHn H22A ..H203 .               | 2.11    | Ang.         |
|                   | -1+x,y,z =                                         | 1_455   | Check        |
| PLAT413_ALERT_2_G | Short Inter XH3 .. XHn H22A ..H23A .               | 2.02    | Ang.         |
|                   | -1+x,y,z =                                         | 1_455   | Check        |
| PLAT413_ALERT_2_G | Short Inter XH3 .. XHn H22C ..H23A .               | 1.91    | Ang.         |
|                   | -1+x,y,z =                                         | 1_455   | Check        |
| PLAT432_ALERT_2_G | Short Inter X...Y Contact C13 ..C21D               | 3.17    | Ang.         |
|                   | -x,1-y,1-z =                                       | 3_566   | Check        |
| PLAT606_ALERT_4_G | VERY LARGE Solvent Accessible VOID(S) in Structure |         | ! Info       |

|                   |                                                  |            |                             |        |              |
|-------------------|--------------------------------------------------|------------|-----------------------------|--------|--------------|
| PLAT794_ALERT_5_G | Tentative Bond Valency for Co2                   | (II)       | .                           | 2.02   | Info         |
| PLAT860_ALERT_3_G | Number of Least-Squares Restraints               | .....      |                             | 319    | Note         |
| PLAT869_ALERT_4_G | ALERTS Related to the Use of SQUEEZE             | Suppressed |                             | !      | Info         |
| PLAT910_ALERT_3_G | Missing # of FCF Reflection(s) Below Theta(Min). |            |                             | 4      | Note         |
| PLAT912_ALERT_4_G | Missing # of FCF Reflections Above STh/L=        | 0.600      |                             | 926    | Note         |
| PLAT933_ALERT_2_G | Number of OMIT Records in Embedded .res File     | ...        |                             | 3      | Note         |
| PLAT950_ALERT_5_G | Calculated (ThMax) and CIF-Reported Hmax         | Differ     |                             | 2      | Units        |
| PLAT956_ALERT_1_G | Calculated (ThMax) and Actual (FCF) Hmax         | Differ     |                             | 2      | Units        |
| PLAT961_ALERT_5_G | Dataset Contains no Negative Intensities         | .....      |                             |        | Please Check |
| PLAT984_ALERT_1_G | The S-f'=                                        | 0.1503     | Deviates from the B&C-Value | 0.1482 | Check        |
| PLAT985_ALERT_1_G | The Co-f"=                                       | 1.1930     | Deviates from the B&C-Value | 1.1884 | Check        |
| PLAT985_ALERT_1_G | The S-f"=                                        | 0.1565     | Deviates from the B&C-Value | 0.1550 | Check        |

- 
- 0 **ALERT level A** = Most likely a serious problem - resolve or explain  
0 **ALERT level B** = A potentially serious problem, consider carefully  
11 **ALERT level C** = Check. Ensure it is not caused by an omission or oversight  
33 **ALERT level G** = General information/check it is not something unexpected
- 9 ALERT type 1 CIF construction/syntax error, inconsistent or missing data  
13 ALERT type 2 Indicator that the structure model may be wrong or deficient  
10 ALERT type 3 Indicator that the structure quality may be low  
8 ALERT type 4 Improvement, methodology, query or suggestion  
4 ALERT type 5 Informative message, check
- 

It is advisable to attempt to resolve as many as possible of the alerts in all categories. Often the minor alerts point to easily fixed oversights, errors and omissions in your CIF or refinement strategy, so attention to these fine details can be worthwhile. In order to resolve some of the more serious problems it may be necessary to carry out additional measurements or structure refinements. However, the purpose of your study may justify the reported deviations and the more serious of these should normally be commented upon in the discussion or experimental section of a paper or in the "special\_details" fields of the CIF. checkCIF was carefully designed to identify outliers and unusual parameters, but every test has its limitations and alerts that are not important in a particular case may appear. Conversely, the absence of alerts does not guarantee there are no aspects of the results needing attention. It is up to the individual to critically assess their own results and, if necessary, seek expert advice.

### Publication of your CIF in IUCr journals

A basic structural check has been run on your CIF. These basic checks will be run on all CIFs submitted for publication in IUCr journals (*Acta Crystallographica*, *Journal of Applied Crystallography*, *Journal of Synchrotron Radiation*); however, if you intend to submit to *Acta Crystallographica Section C* or *E* or *IUCrData*, you should make sure that full publication checks are run on the final version of your CIF prior to submission.

### Publication of your CIF in other journals

Please refer to the *Notes for Authors* of the relevant journal for any special instructions relating to CIF submission.

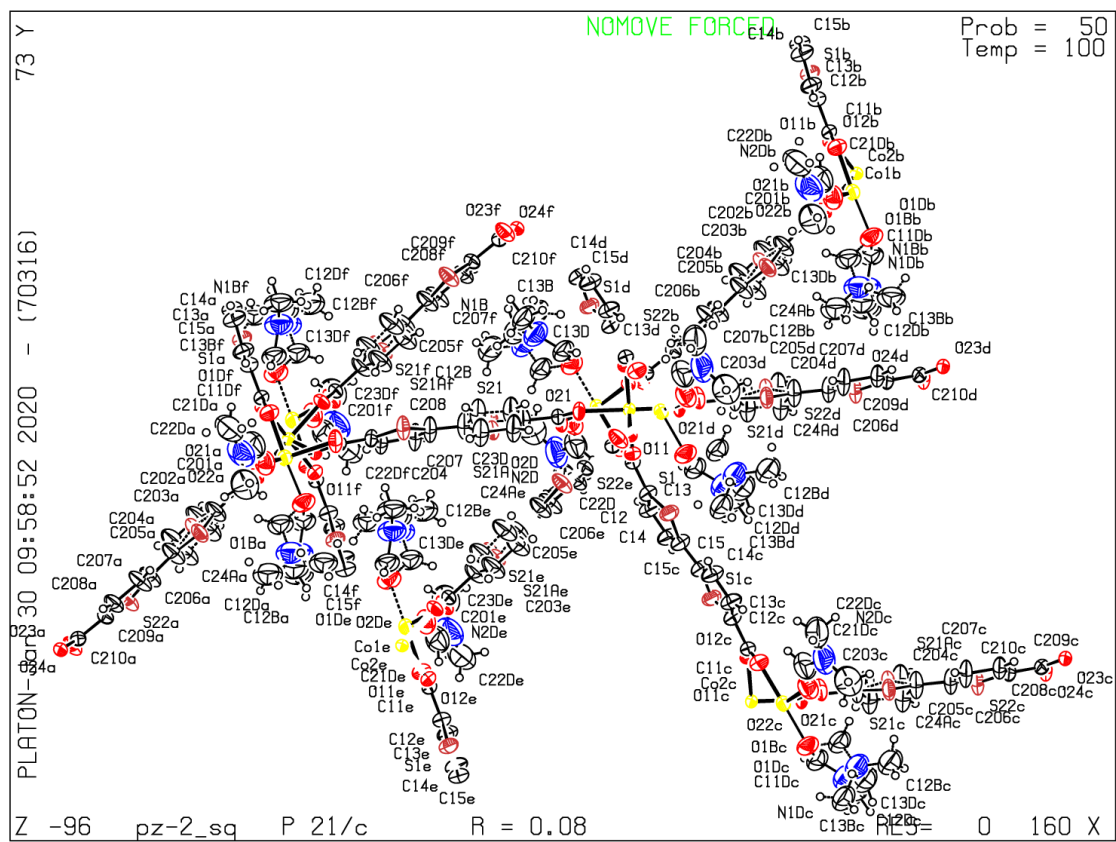

Supplement: s1 [file s1]
