# Supplementary material for: 3D Metal–Organic Frameworks Based on Co(II) and Bithiophendicarboxylate: Synthesis, Crystal Structures, Gas Adsorption, and Magnetic Properties
Source: MDPI journal article supplement (doi:10.3390/molecules26051269), 2021-02-26

# checkCIF/PLATON report

Structure factors have been supplied for datablock(s) ssk-1b

THIS REPORT IS FOR GUIDANCE ONLY. IF USED AS PART OF A REVIEW PROCEDURE FOR PUBLICATION, IT SHOULD NOT REPLACE THE EXPERTISE OF AN EXPERIENCED CRYSTALLOGRAPHIC REFEREE.

No syntax errors found.      CIF dictionary      Interpreting this report

## Datablock: ssk-1b

---

Bond precision:    C-C = 0.0048 A                      Wavelength=0.79313

Cell:                      a=10.852(2)              b=25.406(5)              c=12.801(2)  
                            alpha=90              beta=109.74(3)              gamma=90

Temperature:              100 K

|                | Calculated                             | Reported              |
|----------------|----------------------------------------|-----------------------|
| Volume         | 3321.9(12)                             | 3322.0(12)            |
| Space group    | P 21/c                                 | P 21/c                |
| Hall group     | -P 2ybc                                | -P 2ybc               |
| Moiety formula | C50 H28 Co3 N4 O12 S6,<br>4(C3 H7 N O) | ?                     |
| Sum formula    | C62 H56 Co3 N8 O16 S6                  | C62 H56 Co3 N8 O16 S6 |
| Mr             | 1538.30                                | 1538.29               |
| Dx,g cm-3      | 1.538                                  | 1.538                 |
| Z              | 2                                      | 2                     |
| Mu (mm-1)      | 1.344                                  | 1.345                 |
| F000           | 1578.0                                 | 1578.0                |
| F000'          | 1582.70                                |                       |
| h,k,lmax       | 14,32,16                               | 13,32,16              |
| Nref           | 7601                                   | 7317                  |
| Tmin,Tmax      | 0.817,0.935                            | 0.893,1.000           |
| Tmin'          | 0.817                                  |                       |

Correction method= # Reported T Limits: Tmin=0.893 Tmax=1.000  
AbsCorr = MULTI-SCAN

Data completeness= 0.963                      Theta(max)= 30.977

R(reflections)= 0.0506( 6412)              wR2(reflections)= 0.1429( 7317)

S = 1.052                      Npar= 530

---

The following ALERTS were generated. Each ALERT has the format

**test-name\_ALERT\_alert-type\_alert-level.**

Click on the hyperlinks for more details of the test.

### ● Alert level C

|                   |                                                  |       |        |
|-------------------|--------------------------------------------------|-------|--------|
| PLAT029_ALERT_3_C | _diffn_measured_fraction_theta_full value Low .  | 0.970 | Why?   |
| PLAT220_ALERT_2_C | NonSolvent Resd 1 C Ueq(max) / Ueq(min) Range    | 3.6   | Ratio  |
| PLAT911_ALERT_3_C | Missing FCF Refl Between Thmin & STh/L= 0.600    | 170   | Report |
| PLAT913_ALERT_3_C | Missing # of Very Strong Reflections in FCF .... | 7     | Note   |

### ● Alert level G

|                   |                                                                                    |         |              |
|-------------------|------------------------------------------------------------------------------------|---------|--------------|
| ABSMU01_ALERT_1_G | Calculation of _exptl_absorpt_correction_mu not performed for this radiation type. |         |              |
| PLAT002_ALERT_2_G | Number of Distance or Angle Restraints on AtSite                                   | 20      | Note         |
| PLAT003_ALERT_2_G | Number of Uiso or Uij Restrained non-H Atoms ...                                   | 32      | Report       |
| PLAT004_ALERT_5_G | Polymeric Structure Found with Maximum Dimension                                   | 3       | Info         |
| PLAT092_ALERT_4_G | Check: Wavelength Given is not Cu,Ga,Mo,Ag,In Ka                                   | 0.79313 | Ang.         |
| PLAT176_ALERT_4_G | The CIF-Embedded .res File Contains SADI Records                                   | 3       | Report       |
| PLAT178_ALERT_4_G | The CIF-Embedded .res File Contains SIMU Records                                   | 2       | Report       |
| PLAT302_ALERT_4_G | Anion/Solvent/Minor-Residue Disorder (Resd 2 )                                     | 100%    | Note         |
| PLAT302_ALERT_4_G | Anion/Solvent/Minor-Residue Disorder (Resd 3 )                                     | 100%    | Note         |
| PLAT302_ALERT_4_G | Anion/Solvent/Minor-Residue Disorder (Resd 4 )                                     | 100%    | Note         |
| PLAT302_ALERT_4_G | Anion/Solvent/Minor-Residue Disorder (Resd 5 )                                     | 100%    | Note         |
| PLAT794_ALERT_5_G | Tentative Bond Valency for Co1 (II) .                                              | 2.06    | Info         |
| PLAT794_ALERT_5_G | Tentative Bond Valency for Co2 (II) .                                              | 2.04    | Info         |
| PLAT860_ALERT_3_G | Number of Least-Squares Restraints .....                                           | 334     | Note         |
| PLAT910_ALERT_3_G | Missing # of FCF Reflection(s) Below Theta(Min).                                   | 3       | Note         |
| PLAT912_ALERT_4_G | Missing # of FCF Reflections Above STh/L= 0.600                                    | 100     | Note         |
| PLAT933_ALERT_2_G | Number of OMIT Records in Embedded .res File ...                                   | 7       | Note         |
| PLAT961_ALERT_5_G | Dataset Contains no Negative Intensities .....                                     |         | Please Check |
| PLAT978_ALERT_2_G | Number C-C Bonds with Positive Residual Density.                                   | 1       | Info         |
| PLAT984_ALERT_1_G | The S-f'= 0.1503 Deviates from the B&C-Value                                       | 0.1482  | Check        |
| PLAT985_ALERT_1_G | The Co-f'= 1.1930 Deviates from the B&C-Value                                      | 1.1884  | Check        |
| PLAT985_ALERT_1_G | The S-f'= 0.1565 Deviates from the B&C-Value                                       | 0.1550  | Check        |
| PLAT992_ALERT_5_G | Repd & Actual _reflns_number_gt Values Differ by                                   | 1       | Check        |

0 **ALERT level A** = Most likely a serious problem - resolve or explain  
 0 **ALERT level B** = A potentially serious problem, consider carefully  
 4 **ALERT level C** = Check. Ensure it is not caused by an omission or oversight  
 23 **ALERT level G** = General information/check it is not something unexpected

4 ALERT type 1 CIF construction/syntax error, inconsistent or missing data  
 5 ALERT type 2 Indicator that the structure model may be wrong or deficient  
 5 ALERT type 3 Indicator that the structure quality may be low  
 8 ALERT type 4 Improvement, methodology, query or suggestion  
 5 ALERT type 5 Informative message, check

It is advisable to attempt to resolve as many as possible of the alerts in all categories. Often the minor alerts point to easily fixed oversights, errors and omissions in your CIF or refinement strategy, so attention to these fine details can be worthwhile. In order to resolve some of the more serious problems it may be necessary to carry out additional measurements or structure refinements. However, the purpose of your study may justify the reported deviations and the more serious of these should normally be commented upon in the discussion or experimental section of a paper or in the "special\_details" fields of the CIF. checkCIF was carefully designed to identify outliers and unusual parameters, but every test has its limitations and alerts that are not important in a particular case may appear. Conversely, the absence of alerts does not guarantee there are no aspects of the results needing attention. It is up to the individual to critically assess their own results and, if necessary, seek expert advice.

### **Publication of your CIF in IUCr journals**

A basic structural check has been run on your CIF. These basic checks will be run on all CIFs submitted for publication in IUCr journals (*Acta Crystallographica*, *Journal of Applied Crystallography*, *Journal of Synchrotron Radiation*); however, if you intend to submit to *Acta Crystallographica Section C* or *E* or *IUCrData*, you should make sure that full publication checks are run on the final version of your CIF prior to submission.

### **Publication of your CIF in other journals**

Please refer to the *Notes for Authors* of the relevant journal for any special instructions relating to CIF submission.

---

**PLATON version of 22/12/2019; check.def file version of 13/12/2019**

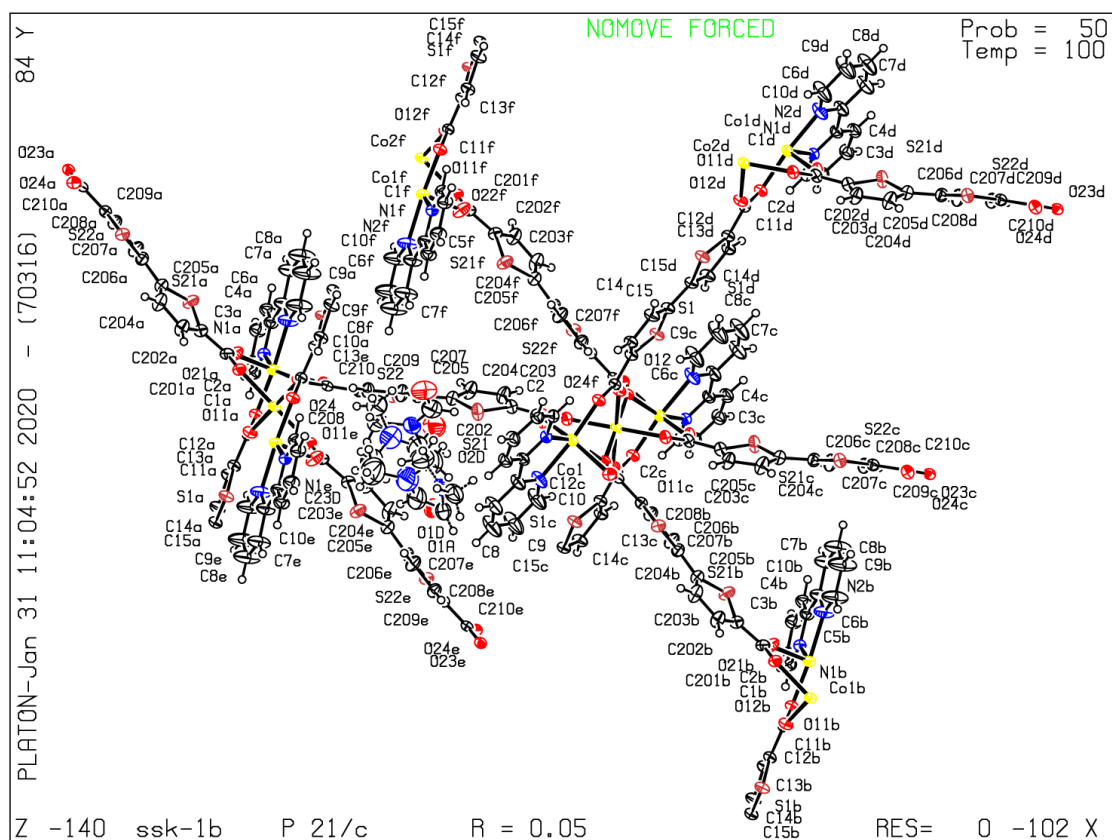

Supplement: s1 [file s1]
