# Supplementary material for: 3D Metal–Organic Frameworks Based on Co(II) and Bithiophendicarboxylate: Synthesis, Crystal Structures, Gas Adsorption, and Magnetic Properties
Source: MDPI journal article supplement (doi:10.3390/molecules26051269), 2021-02-26

# checkCIF/PLATON report

Structure factors have been supplied for datablock(s) pz-8\_sq

THIS REPORT IS FOR GUIDANCE ONLY. IF USED AS PART OF A REVIEW PROCEDURE FOR PUBLICATION, IT SHOULD NOT REPLACE THE EXPERTISE OF AN EXPERIENCED CRYSTALLOGRAPHIC REFEREE.

No syntax errors found.      CIF dictionary      Interpreting this report

## Datablock: pz-8\_sq

---

Bond precision:    C-C = 0.0030 Å                      Wavelength=0.79313

Cell:                      a=11.746(2)              b=42.150(4)              c=51.849(2)  
                            alpha=90              beta=90              gamma=90  
Temperature:              100 K

|                        | Calculated                        | Reported                 |
|------------------------|-----------------------------------|--------------------------|
| Volume                 | 25670(5)                          | 25670(5)                 |
| Space group            | F d d d                           | F d d d                  |
| Hall group             | -F 2uv 2vw                        | -F 2uv 2vw               |
| Moiety formula         | C40 H30 Co3 N4 O14 S6 [+ solvent] | ?                        |
| Sum formula            | C40 H30 Co3 N4 O14 S6 [+ solvent] | C52 H61 Co3 N8 O19.50 S6 |
| Mr                     | 1159.83                           | 1479.23                  |
| Dx, g cm <sup>-3</sup> | 1.200                             | 1.531                    |
| Z                      | 16                                | 16                       |
| Mu (mm <sup>-1</sup> ) | 1.359                             | 1.392                    |
| F000                   | 9392.0                            | 12192.0                  |
| F000'                  | 9427.86                           |                          |
| h,k,lmax               | 15,54,67                          | 15,54,64                 |
| Nref                   | 7392                              | 7189                     |
| Tmin,Tmax              | 0.920,0.933                       | 0.785,1.000              |
| Tmin'                  | 0.870                             |                          |

Correction method= # Reported T Limits: Tmin=0.785 Tmax=1.000  
AbsCorr = MULTI-SCAN

Data completeness= 0.973                      Theta(max)= 31.034

R(reflections)= 0.0361( 6073)              wR2(reflections)= 0.0997( 7189)

S = 1.073                      Npar= 307

---

The following ALERTS were generated. Each ALERT has the format

**test-name\_ALERT\_alert-type\_alert-level.**

Click on the hyperlinks for more details of the test.

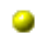

### Alert level C

|                   |                                                  |         |                                 |     |        |
|-------------------|--------------------------------------------------|---------|---------------------------------|-----|--------|
| PLAT220_ALERT_2_C | NonSolvent Resd 1                                | C       | Ueq(max) / Ueq(min) Range       | 3.5 | Ratio  |
| PLAT242_ALERT_2_C | Low                                              | MainMol | Ueq as Compared to Neighbors of | N1D | Check  |
| PLAT911_ALERT_3_C | Missing FCF Refl Between Thmin & STh/L=          | 0.600   |                                 | 111 | Report |
| PLAT913_ALERT_3_C | Missing # of Very Strong Reflections in FCF .... |         |                                 | 6   | Note   |

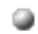

### Alert level G

FORMU01\_ALERT\_2\_G There is a discrepancy between the atom counts in the  
\_chemical\_formula\_sum and the formula from the \_atom\_site\* data.  
Atom count from \_chemical\_formula\_sum: C52 H61 Co3 N8 O19.5 S6  
Atom count from the \_atom\_site data: C40 H30 Co3 N4 O14 S6

ABSMU01\_ALERT\_1\_G Calculation of \_exptl\_absorpt\_correction\_mu  
not performed for this radiation type.

CELLZ01\_ALERT\_1\_G Difference between formula and atom\_site contents detected.  
CELLZ01\_ALERT\_1\_G ALERT: Large difference may be due to a  
symmetry error - see SYMMG tests  
From the CIF: \_cell\_formula\_units\_Z 16  
From the CIF: \_chemical\_formula\_sum C52 H61 Co3 N8 O19.50 S6  
TEST: Compare cell contents of formula and atom\_site data

| atom | Z*formula | cif sites | diff   |
|------|-----------|-----------|--------|
| C    | 832.00    | 640.00    | 192.00 |
| H    | 976.00    | 480.00    | 496.00 |
| Co   | 48.00     | 48.00     | 0.00   |
| N    | 128.00    | 64.00     | 64.00  |
| O    | 312.00    | 224.00    | 88.00  |
| S    | 96.00     | 96.00     | 0.00   |

PLAT003\_ALERT\_2\_G Number of Uiso or Uij Restrained non-H Atoms ... 1 Report

PLAT041\_ALERT\_1\_G Calc. and Reported SumFormula Strings Differ Please Check

PLAT051\_ALERT\_1\_G Mu(calc) and Mu(CIF) Ratio Differs from 1.0 by . 2.34 %

PLAT068\_ALERT\_1\_G Reported F000 Differs from Calcd (or Missing)... Please Check

PLAT083\_ALERT\_2\_G SHELXL Second Parameter in WGHT Unusually Large 38.46 Why ?

PLAT092\_ALERT\_4\_G Check: Wavelength Given is not Cu,Ga,Mo,Ag,In Ka 0.79313 Ang.

PLAT186\_ALERT\_4\_G The CIF-Embedded .res File Contains ISOR Records 1 Report

PLAT606\_ALERT\_4\_G VERY LARGE Solvent Accessible VOID(S) in Structure ! Info

PLAT794\_ALERT\_5\_G Tentative Bond Valency for Co1 (II) . 2.04 Info

PLAT794\_ALERT\_5\_G Tentative Bond Valency for Co2 (II) . 1.99 Info

PLAT804\_ALERT\_5\_G Number of ARU-Code Packing Problem(s) in PLATON 45 Info

PLAT860\_ALERT\_3\_G Number of Least-Squares Restraints ..... 6 Note

PLAT869\_ALERT\_4\_G ALERTS Related to the Use of SQUEEZE Suppressed ! Info

PLAT912\_ALERT\_4\_G Missing # of FCF Reflections Above STh/L= 0.600 70 Note

PLAT952\_ALERT\_5\_G Calculated (ThMax) and CIF-Reported Lmax Differ 3 Units

PLAT958\_ALERT\_1\_G Calculated (ThMax) and Actual (FCF) Lmax Differ 3 Units

PLAT961\_ALERT\_5\_G Dataset Contains no Negative Intensities ..... Please Check

PLAT978\_ALERT\_2\_G Number C-C Bonds with Positive Residual Density. 2 Info

PLAT984\_ALERT\_1\_G The S-f'= 0.1503 Deviates from the B&C-Value 0.1482 Check

PLAT985\_ALERT\_1\_G The Co-f'= 1.1930 Deviates from the B&C-Value 1.1884 Check

PLAT985\_ALERT\_1\_G The S-f'= 0.1565 Deviates from the B&C-Value 0.1550 Check

- 
- 0 **ALERT level A** = Most likely a serious problem - resolve or explain  
0 **ALERT level B** = A potentially serious problem, consider carefully  
4 **ALERT level C** = Check. Ensure it is not caused by an omission or oversight  
25 **ALERT level G** = General information/check it is not something unexpected

10 ALERT type 1 CIF construction/syntax error, inconsistent or missing data  
6 ALERT type 2 Indicator that the structure model may be wrong or deficient  
3 ALERT type 3 Indicator that the structure quality may be low  
5 ALERT type 4 Improvement, methodology, query or suggestion  
5 ALERT type 5 Informative message, check

---

It is advisable to attempt to resolve as many as possible of the alerts in all categories. Often the minor alerts point to easily fixed oversights, errors and omissions in your CIF or refinement strategy, so attention to these fine details can be worthwhile. In order to resolve some of the more serious problems it may be necessary to carry out additional measurements or structure refinements. However, the purpose of your study may justify the reported deviations and the more serious of these should normally be commented upon in the discussion or experimental section of a paper or in the "special\_details" fields of the CIF. checkCIF was carefully designed to identify outliers and unusual parameters, but every test has its limitations and alerts that are not important in a particular case may appear. Conversely, the absence of alerts does not guarantee there are no aspects of the results needing attention. It is up to the individual to critically assess their own results and, if necessary, seek expert advice.

### **Publication of your CIF in IUCr journals**

A basic structural check has been run on your CIF. These basic checks will be run on all CIFs submitted for publication in IUCr journals (*Acta Crystallographica*, *Journal of Applied Crystallography*, *Journal of Synchrotron Radiation*); however, if you intend to submit to *Acta Crystallographica Section C* or *E* or *IUCrData*, you should make sure that full publication checks are run on the final version of your CIF prior to submission.

### **Publication of your CIF in other journals**

Please refer to the *Notes for Authors* of the relevant journal for any special instructions relating to CIF submission.

---

**PLATON version of 22/12/2019; check.def file version of 13/12/2019**

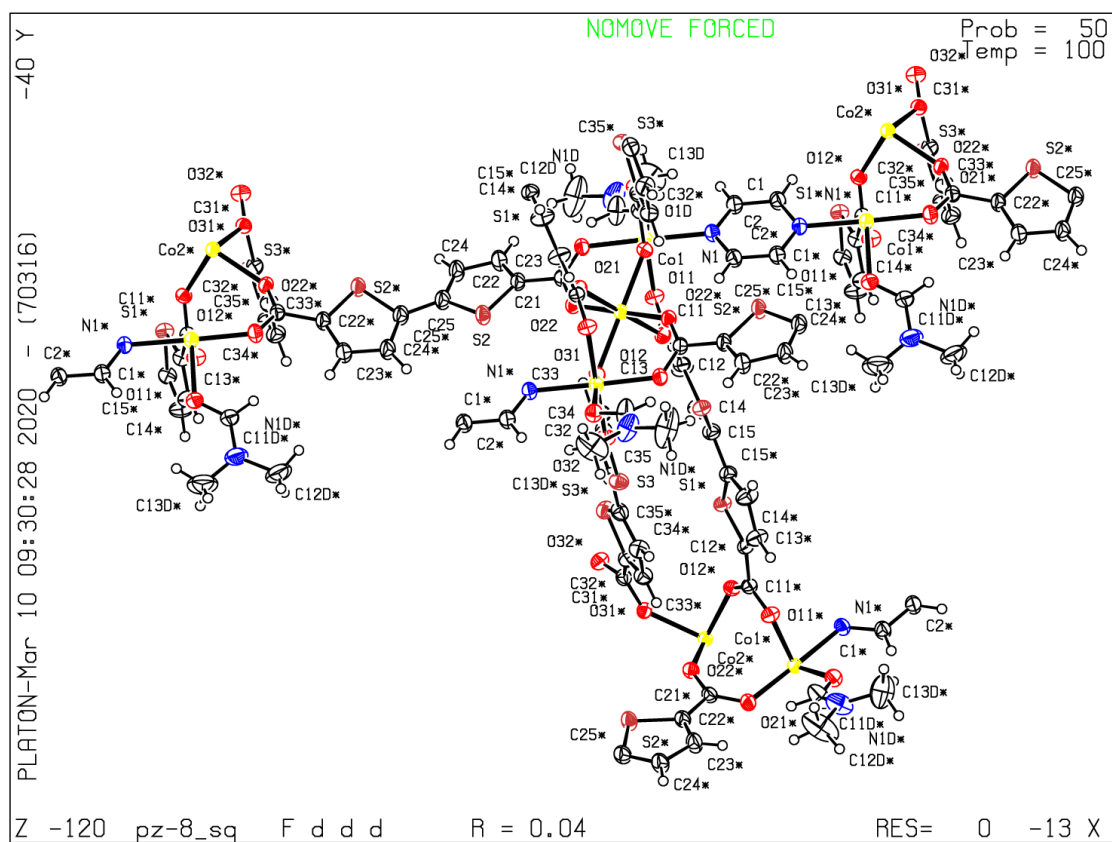

Supplement: s1 [file s1]
