# Supplementary material for: 3D Metal–Organic Frameworks Based on Co(II) and Bithiophendicarboxylate: Synthesis, Crystal Structures, Gas Adsorption, and Magnetic Properties
Source: MDPI journal article supplement (doi:10.3390/molecules26051269), 2021-02-26
Supplement: s1 [file s1]

# 3D metal-organic frameworks based on Co(II) and bithiophendicarboxylate: synthesis, crystal structures, gas adsorption, and magnetic properties

Vadim A. Dubskikh, Anna A. Lysova, Denis G. Samsonenko, Alexander N. Lavrov, Konstantin A. Kovalenko, Danil N. Dybtsev,\* Vladimir P. Fedin

Nikolaev Institute of Inorganic Chemistry, Siberian Branch of the Russian Academy of Sciences, 3 Acad. Lavrentiev Ave., 630090, Novosibirsk, Russia

\*Corresponding author, dan@niic.nsc.ru

Table S1. Crystal data and structure refinement for **1–3**.

| Identification code                        | <b>1</b>                                                                                      | <b>2</b>                                                                                        | <b>3</b>                                                                                      |
|--------------------------------------------|-----------------------------------------------------------------------------------------------|-------------------------------------------------------------------------------------------------|-----------------------------------------------------------------------------------------------|
| Empirical formula                          | C <sub>62</sub> H <sub>56</sub> N <sub>8</sub> O <sub>16</sub> S <sub>6</sub> Co <sub>3</sub> | C <sub>52</sub> H <sub>61</sub> N <sub>8</sub> O <sub>19.5</sub> S <sub>6</sub> Co <sub>3</sub> | C <sub>48</sub> H <sub>58</sub> N <sub>6</sub> O <sub>20</sub> S <sub>6</sub> Co <sub>3</sub> |
| <i>M</i> , g/mol                           | 1528.29                                                                                       | 1479.23                                                                                         | 1408.15                                                                                       |
| <i>T</i> , K                               | 100                                                                                           | 100                                                                                             | 100                                                                                           |
| Crystal system                             | <i>Monoclinic</i>                                                                             | <i>Orthorhombic</i>                                                                             | <i>Monoclinic</i>                                                                             |
| Space group                                | <i>P2<sub>1</sub>/c</i>                                                                       | <i>Fddd</i>                                                                                     | <i>P2<sub>1</sub>/c</i>                                                                       |
| <i>a</i> , Å                               | 10.852(2)                                                                                     | 11.746(2)                                                                                       | 11.96(2)                                                                                      |
| <i>b</i> , Å                               | 25.406(5)                                                                                     | 42.150(4)                                                                                       | 25.867(8)                                                                                     |
| <i>c</i> , Å                               | 12.801(2)                                                                                     | 51.849(2)                                                                                       | 11.461(16)                                                                                    |
| $\alpha$ , град.                           | 90                                                                                            | 90                                                                                              | 90                                                                                            |
| $\beta$ , град.                            | 109.74(3)                                                                                     | 90                                                                                              | 106.49(3)                                                                                     |
| $\gamma$ , degree                          | 90                                                                                            | 90                                                                                              | 90                                                                                            |
| <i>V</i> , Å <sup>3</sup>                  | 3322.0(12)                                                                                    | 25670(5)                                                                                        | 3400(8)                                                                                       |
| <i>Z</i>                                   | 2                                                                                             | 16                                                                                              | 2                                                                                             |
| <i>D</i> (calc.), g/cm <sup>3</sup>        | 1.538                                                                                         | 1.531                                                                                           | 1.376                                                                                         |
| $\mu$ , mm <sup>−1</sup>                   | 1.345                                                                                         | 1.392                                                                                           | 1.309                                                                                         |
| <i>F</i> (000)                             | 1578                                                                                          | 12192                                                                                           | 1450                                                                                          |
| Crystal size, mm                           | 0.15 × 0.15 × 0.05                                                                            | 0.10 × 0.05 × 0.05                                                                              | 0.05 × 0.05 × 0.02                                                                            |
| $\theta$ range for data collection, deg.   | 2.40–30.98                                                                                    | 1.39–31.03                                                                                      | 2.58–32.41                                                                                    |
| Index ranges                               | −13 < <i>h</i> < 13,<br>−28 < <i>k</i> < 32,<br>−16 < <i>l</i> < 16                           | −15 < <i>h</i> < 15,<br>−54 < <i>k</i> < 54,<br>−59 < <i>l</i> < 64                             | −14 < <i>h</i> < 14,<br>−33 < <i>k</i> < 33,<br>−15 < <i>l</i> < 15                           |
| Reflections collected / independent        | 19683 / 7317                                                                                  | 50295 / 7189                                                                                    | 28176 / 7481                                                                                  |
| <i>R</i> <sub>int</sub>                    | 0.0514                                                                                        | 0.0585                                                                                          | 0.0782                                                                                        |
| Reflections with <i>I</i> > 2σ( <i>I</i> ) | 6412                                                                                          | 6073                                                                                            | 4702                                                                                          |

|                                              |                                    |                                    |                                    |
|----------------------------------------------|------------------------------------|------------------------------------|------------------------------------|
| Goodness-of-fit on $F^2$                     | 1.052                              | 1.073                              | 1.044                              |
| Final $R$ indices<br>[ $I > 2\sigma(I)$ ]    | $R_1 = 0.0506,$<br>$wR_2 = 0.1375$ | $R_1 = 0.0361,$<br>$wR_2 = 0.0961$ | $R_1 = 0.0764,$<br>$wR_2 = 0.2142$ |
| $R$ indices (all data)                       | $R_1 = 0.0575,$<br>$wR_2 = 0.1429$ | $R_1 = 0.0442$<br>$wR_2 = 0.0997$  | $R_1 = 0.1170,$<br>$wR_2 = 0.2365$ |
| Largest diff. peak<br>hole, $e/\text{\AA}^3$ | 0.723 / -0.738                     | 0.390 / -0.517                     | 0.863 / -0.875                     |

---

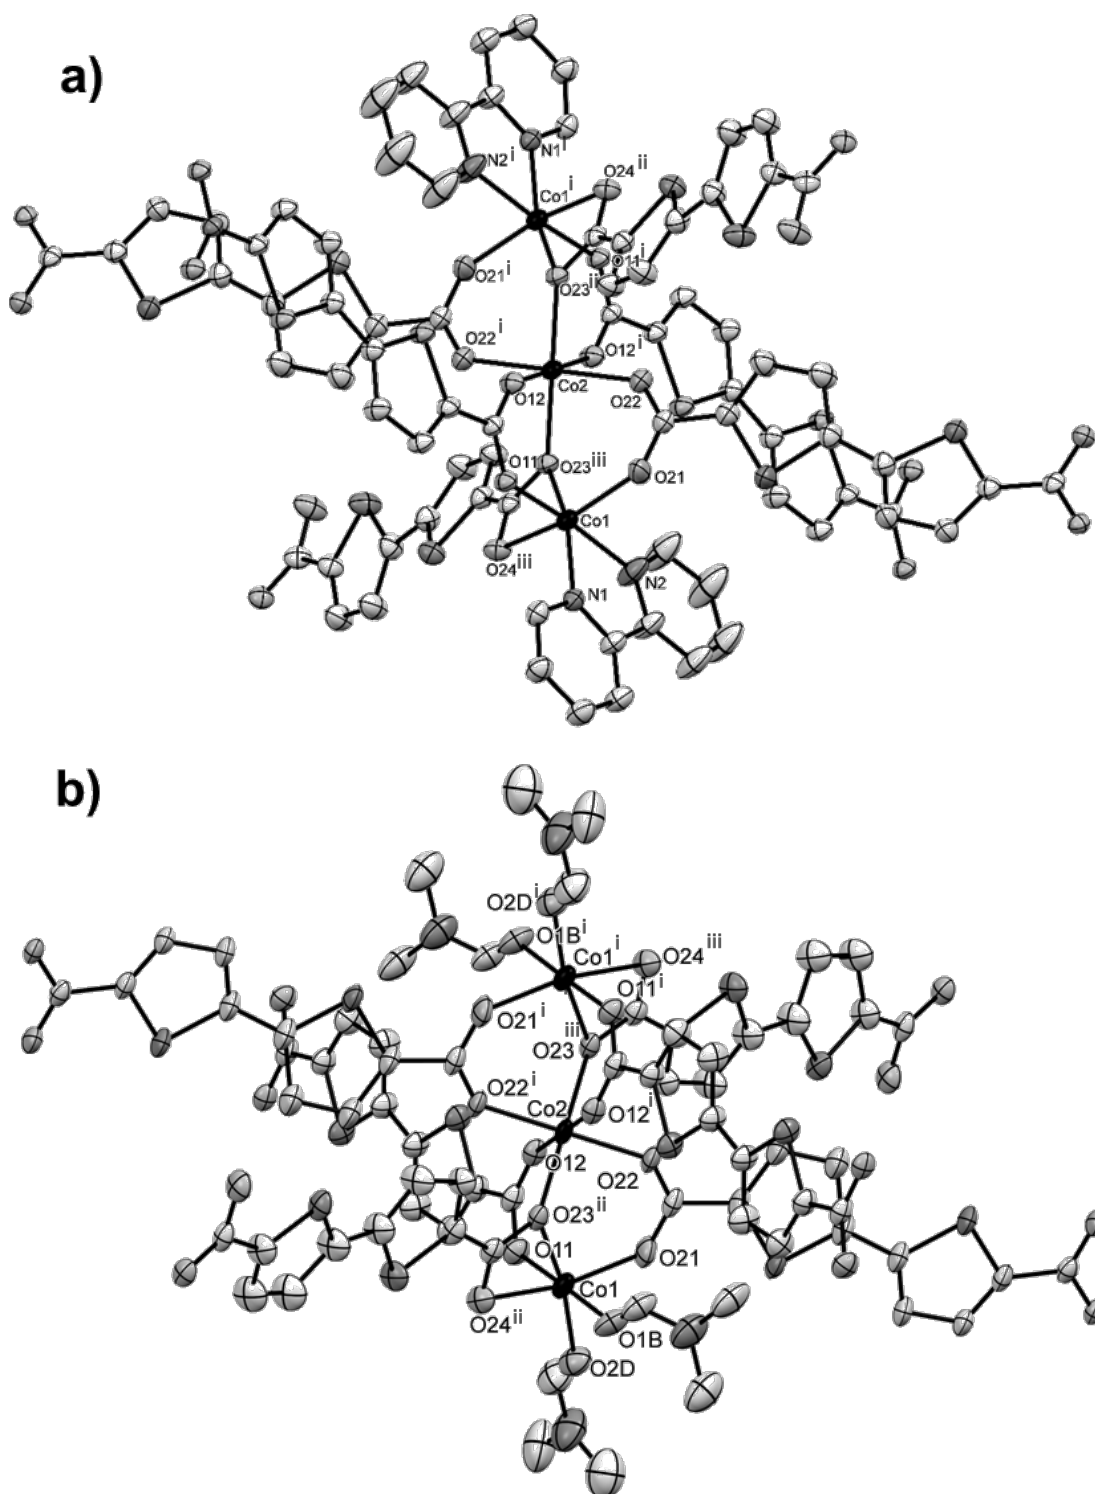

**Figure S1.** Coordination environment of Co(II) cations in **1** (a) and **3** (b). a) Ellipsoids of 50% probability. Symmetry code: i):  $1 - x, 1 - y, 1 - z$ ; ii)  $x, \frac{1}{2} - y, \frac{1}{2} + z$ ; iii)  $1 - x, \frac{1}{2} + y, \frac{1}{2} - z$ . b) Ellipsoids of 30% probability. Symmetry code: i):  $1 - x, 1 - y, 1 - z$ ; ii)  $1 - x, \frac{1}{2} + y, \frac{3}{2} - z$ ; iii)  $x, \frac{1}{2} - y, z - \frac{1}{2}$ . Only one of the possible orientations of coordinated DMF molecules and  $\text{btdc}^{2-}$  ligands is shown. Hydrogen atoms are not shown.

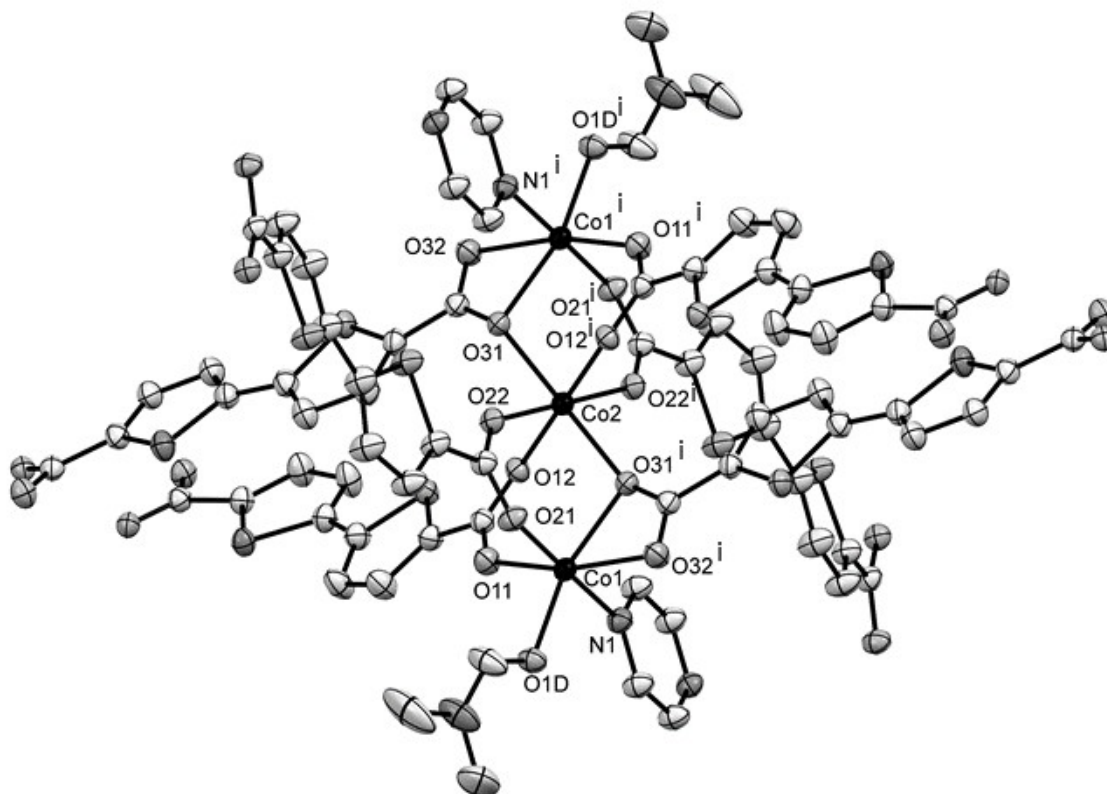

**Figure S2.** Coordination environment of Co(II) cations in **2**. Ellipsoids of 50% probability. Hydrogen atoms are not shown. Symmetry code (i):  $1/2 - x, 1 - y, 3/2 - z$ .

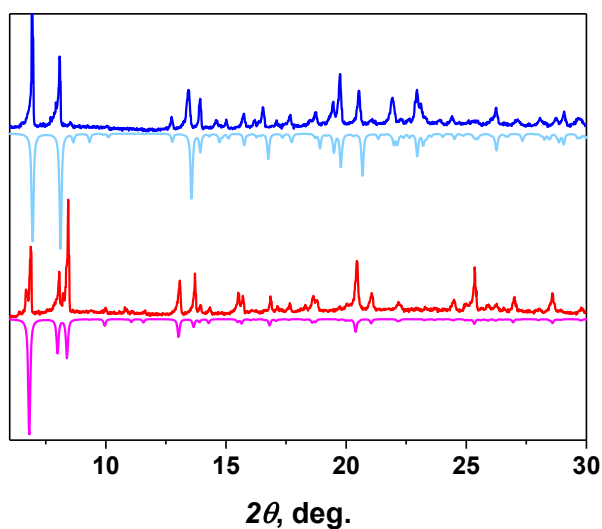

**Figure S3.** Powder X-ray diffraction patterns for compounds **1** and **2** (experimentally observed – in blue and red, respectively, theoretical – in light-blue and pink, respectively).

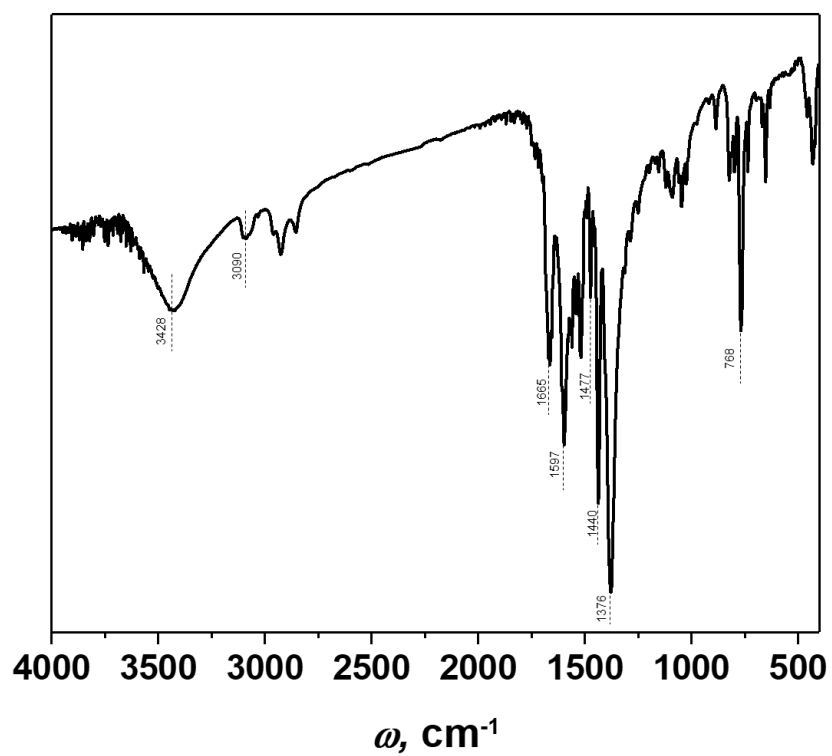

**Figure S4.** The IR spectrum of the compound 1.

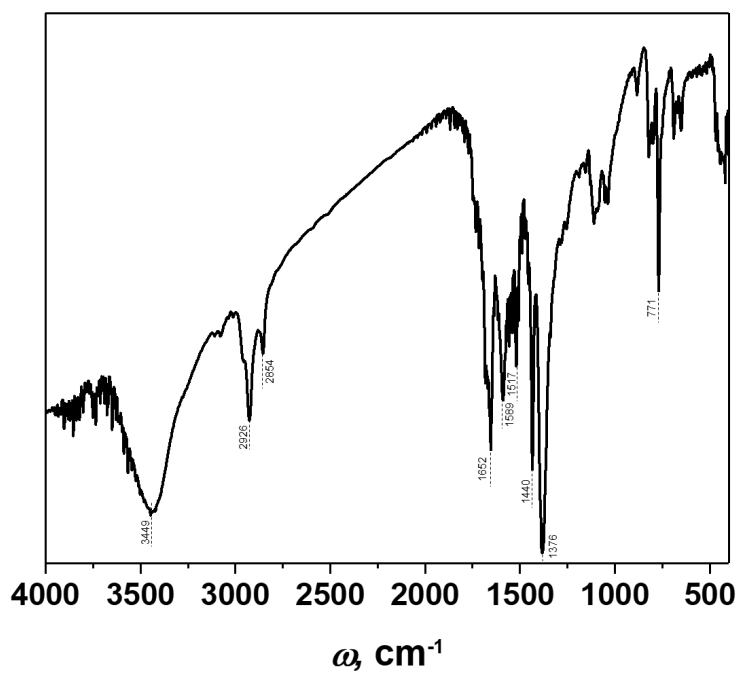

**Figure S5.** The IR spectrum of the compound 2.

## Isotherms

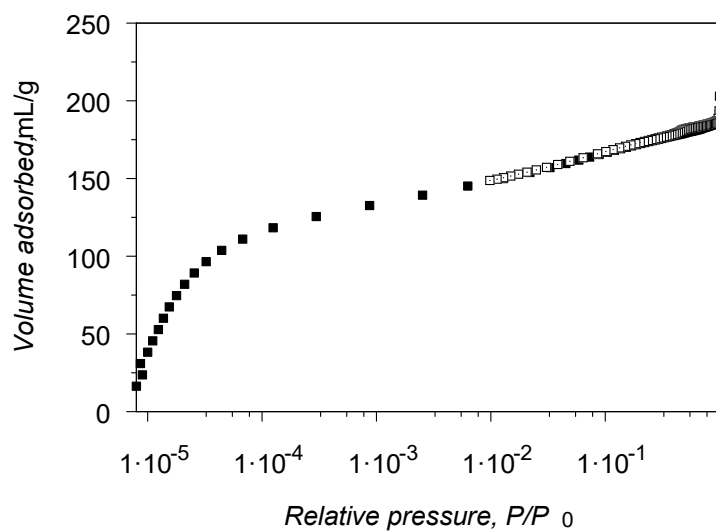

**Figure S6.** Semilogarithmic representation of nitrogen adsorption (filled squares) and desorption (open squares) isotherms at 77 K for the compound **1**.

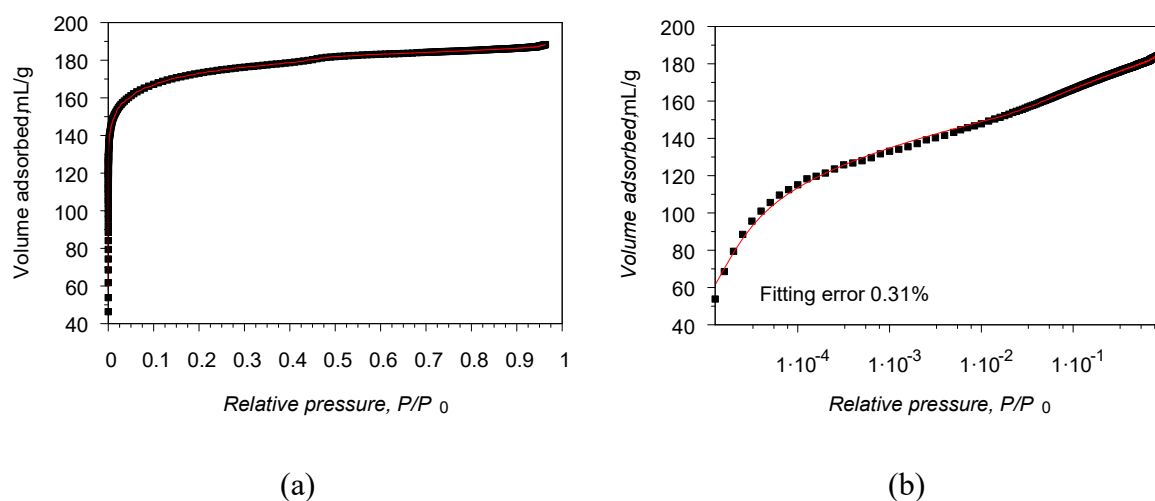

**Figure S7.** Nitrogen adsorption isotherm fit (from pore size distribution calculation): a) normal scale; b) semilogarithmic scale.

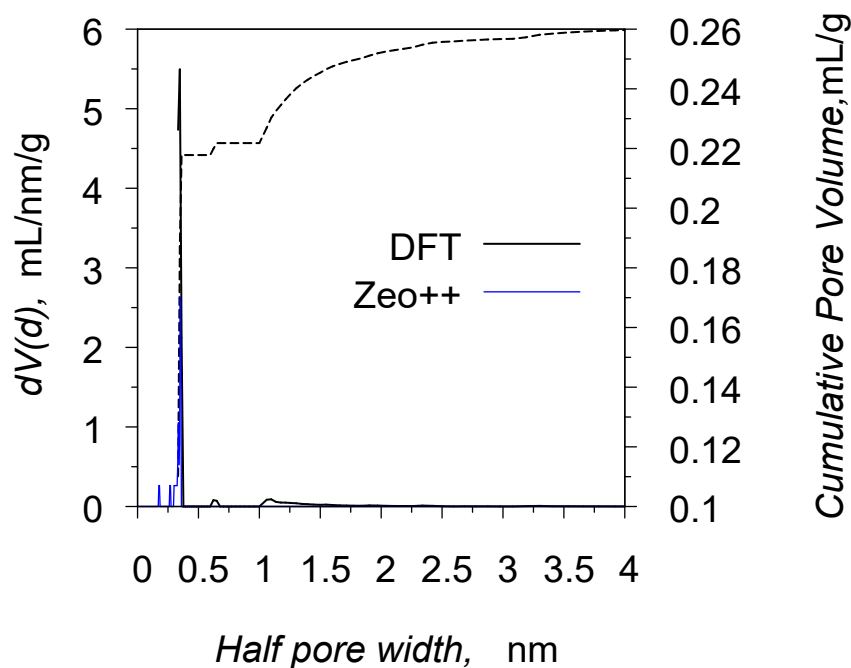

**Figure S8.** Pore size distributions for **1** calculated by DFT (N<sub>2</sub> adsorption at 77 K) and Zeo++ [1, 2].

Gas adsorption isotherms at 273 K and 298 K were fitted by virial equation (S1) in order to calculate Henry constants and isosteric heats of adsorption.

$$\ln p = \ln n + \frac{1}{T} \sum_i A_i \cdot n^i + \sum_j B_j \cdot n^j \quad (\text{S1})$$

Virial coefficients are summarized in Table S2, whereas fit plots are shown in Figure S6.

**Table S2.** Virial coefficients  $A_i$  and  $B_i$  for gas adsorption isotherms at 273 K and 298 K on **1**.

| Gas             | Coefficients |            |
|-----------------|--------------|------------|
| CO <sub>2</sub> | A0           | = -3134.2  |
|                 | A1           | = 114.639  |
|                 | B0           | = 9.42998  |
| CH <sub>4</sub> | A0           | = -2375.36 |
|                 | A1           | = 124.085  |
|                 | B0           | = 8.22832  |
| N <sub>2</sub>  | A0           | = -1061.3  |
|                 | B0           | = 5.41696  |
| O <sub>2</sub>  | A0           | = -1236.34 |
|                 | B0           | = 6.29766  |
|                 | B1           | = 0.622471 |
| CO              | A0           | = -2079.3  |
|                 | A1           | = 189.31   |

|  |    |           |
|--|----|-----------|
|  | B0 | = 8.60369 |
|--|----|-----------|

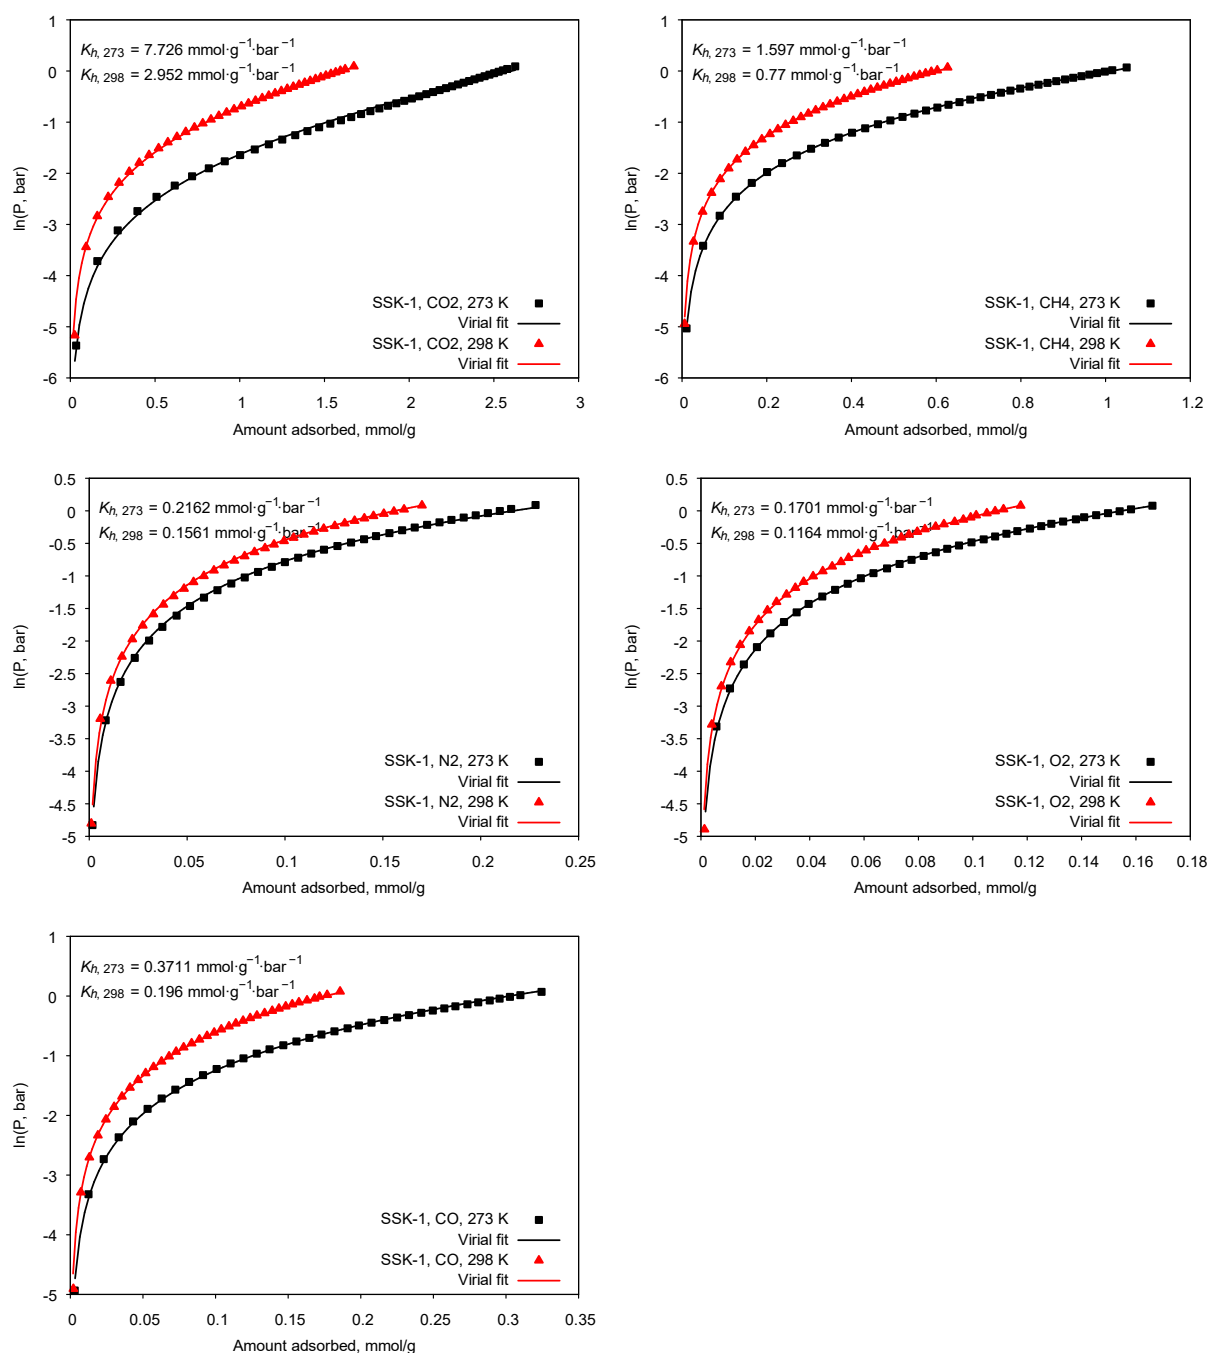

**Figure S9.** Fits of isotherms by virial equations.

### Heats of adsorption

Isosteric heats of adsorption were calculated using virial coefficients by equation (S2):

$$\Delta H^\circ = R \cdot \sum_i A_i \cdot n^i \quad (\text{S2})$$

The corresponding graphs are shown in Figure S7.



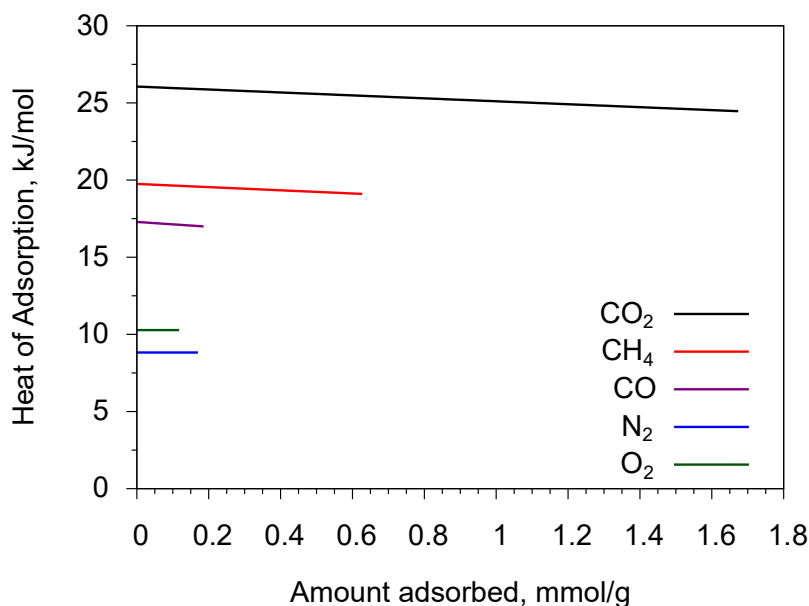

**Figure S10.** Isosteric heats of gas adsorption on **1**.

### Henry constants

Henry constants were calculated using virial coefficients by equation (S3):

$$K_h = \exp \left[ \frac{-A_0}{T} - B_0 \right] \quad (\text{S3})$$

**Table S3.** Henry constants for gas adsorption on **1** in  $\text{mmol} \cdot \text{g}^{-1} \cdot \text{bar}^{-1}$  at 273 K and 298 K.

| Gas\Temperature | 273 K  | 298 K  |
|-----------------|--------|--------|
| CO <sub>2</sub> | 7.726  | 2.952  |
| CH <sub>4</sub> | 1.597  | 0.770  |
| N <sub>2</sub>  | 0.2162 | 0.1561 |
| O <sub>2</sub>  | 0.1701 | 0.1164 |
| CO              | 0.3711 | 0.1960 |

### Fit of adsorption isotherms

Adsorption isotherms were fitted by the most appropriate model for IAST calculations. Fittings were performed for isotherms in  $\text{mL/g-torr}$  units, so parameters are in the corresponding units.

CO<sub>2</sub>: Langmuir–Freundlich model

CH<sub>4</sub>: Langmuir model

N<sub>2</sub>: Langmuir model

O<sub>2</sub>: Langmuir model

CO: Langmuir model

Fitted parameters are summarized in Table S4. Fitted isotherms are shown in Figure S8.

**Table S4.** Fitted parameters for adsorption isotherms on **1** at 273 K and 298 K

| Gas             | 273 K |               | 298 K |               |
|-----------------|-------|---------------|-------|---------------|
| CO <sub>2</sub> | w     | = 88.4914     | w     | = 86.0091     |
|                 | b     | = 0.00217916  | b     | = 0.000980014 |
|                 | t     | = 0.985349    | t     | = 1.00567     |
| CH <sub>4</sub> | w     | = 63.1814     | w     | = 57.9179     |
|                 | b     | = 0.000741005 | b     | = 0.000399736 |
| N <sub>2</sub>  | w     | = 60.0168     | w     | = 165.73      |
|                 | b     | = 0.000113724 | b     | = 2.89476e-05 |
| O <sub>2</sub>  | w     | = 33.4228     | w     | = 45.9629     |
|                 | b     | = 0.000154405 | b     | = 7.47483e-05 |
| CO              | w     | = 46.2654     | w     | = 35.8648     |
|                 | b     | = 0.000232935 | b     | = 0.000162124 |

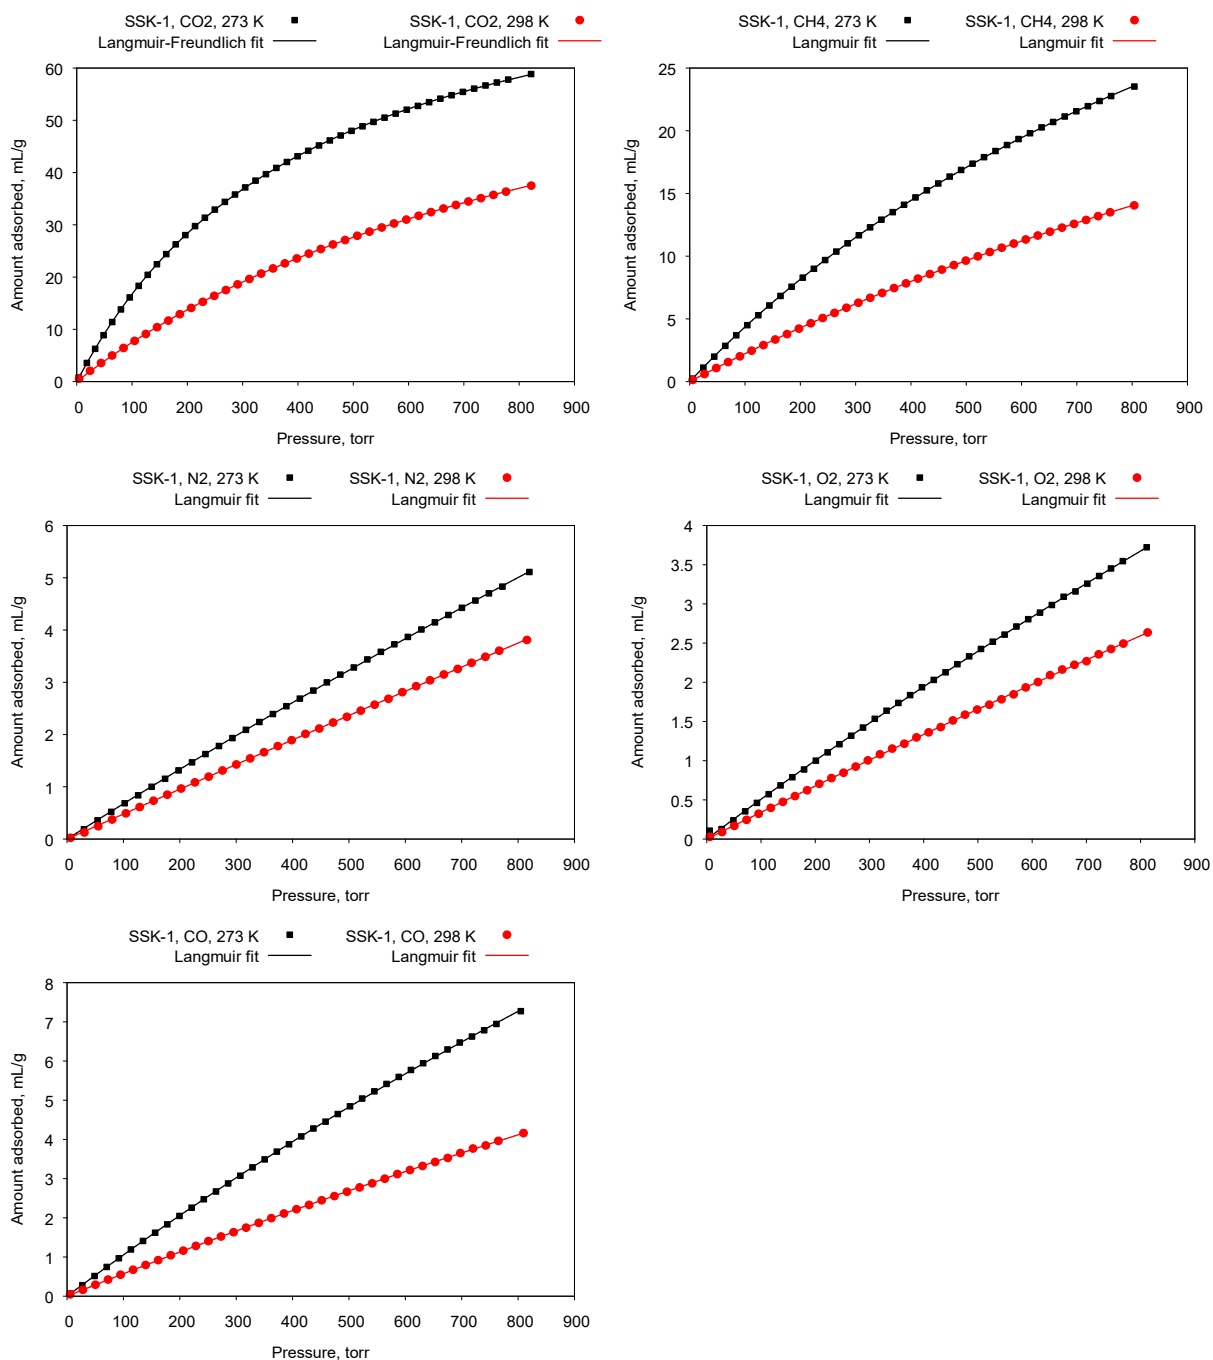

**Figure S11.** Fits of the gas adsorption isotherms by appropriate models.

## Selectivity calculations

Selectivity factors were evaluated by three commonly used methods:

- As the molar ratio of the adsorption quantities at the relevant partial pressures of the gases:

$$S = \frac{n_1/n_2}{p_1/p_2}, \quad (\text{S2})$$

where  $S$  is the selectivity factor,  $n_i$  represents the adsorbed amount of component  $i$ , and  $p_i$  represents the partial pressure of component  $i$ .

- (ii) As a ratio of Henry constants which corresponds to the slope of the adsorption isotherm at very low partial pressures:

$$S = \frac{K_{H1}}{K_{H2}} \quad (S3)$$

- (iii) By ideal adsorbed solution theory (IAST). The relationship between  $P$ ,  $y_i$  and  $x_i$  ( $P$  — the total pressure of the gas phase,  $y_i$  — mole fraction of the  $i$ -component in gas phase,  $x_i$  — mole fraction of the  $i$ -component in adsorbed state) is defined according to the IAST theory [3]:

$$\int_{p=0}^{p=\frac{Py_1}{x_1}} n_1(p) d\ln p = \int_{p=0}^{p=\frac{Py_2}{x_2}} n_2(p) d\ln p \quad (S4)$$

In this case the selectivity factors were determined as:

$$S = \frac{y_2/x_2}{y_1/x_1} = \frac{x_1(1-y_1)}{y_1(1-x_1)} \quad (S5)$$

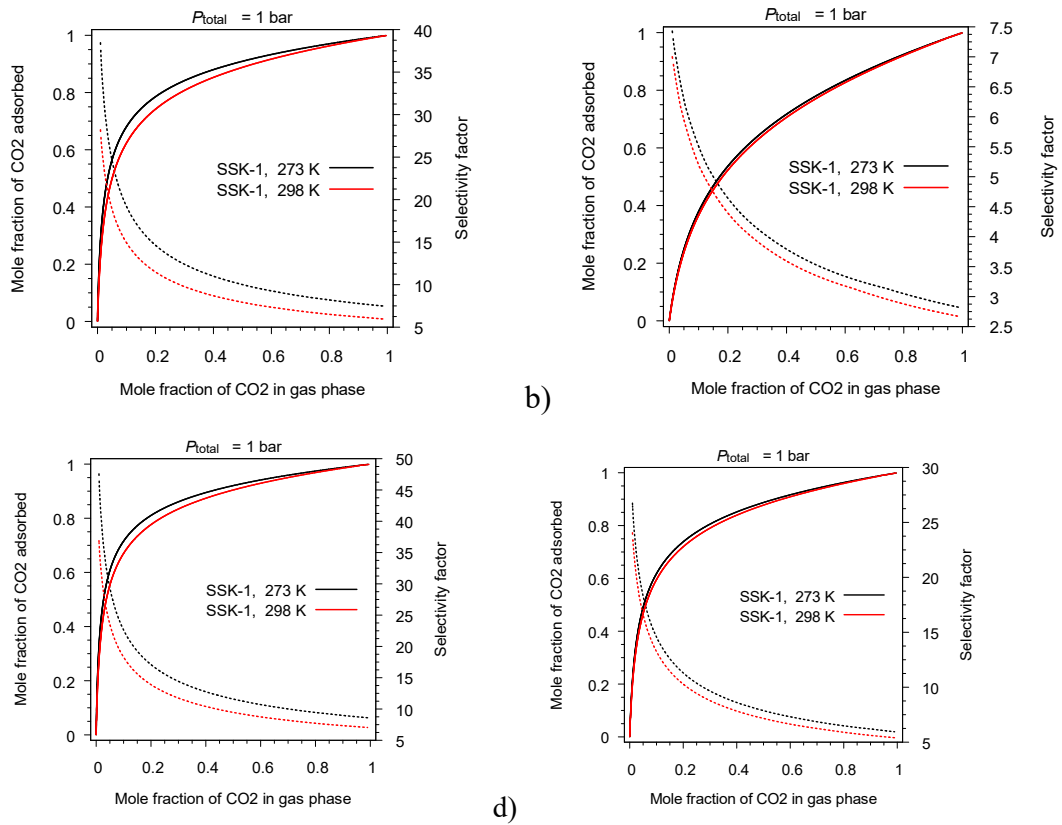

**Fig. S12.** Prediction of adsorption equilibrium by IAST (solid lines) and dependence of selectivity factors on gas phase composition (dashed lines) for binary gas mixtures: a)  $\text{CO}_2/\text{N}_2$ ; b)  $\text{CO}_2/\text{CH}_4$ ; c)  $\text{CO}_2/\text{O}_2$ ; d)  $\text{CO}_2/\text{CO}$ .

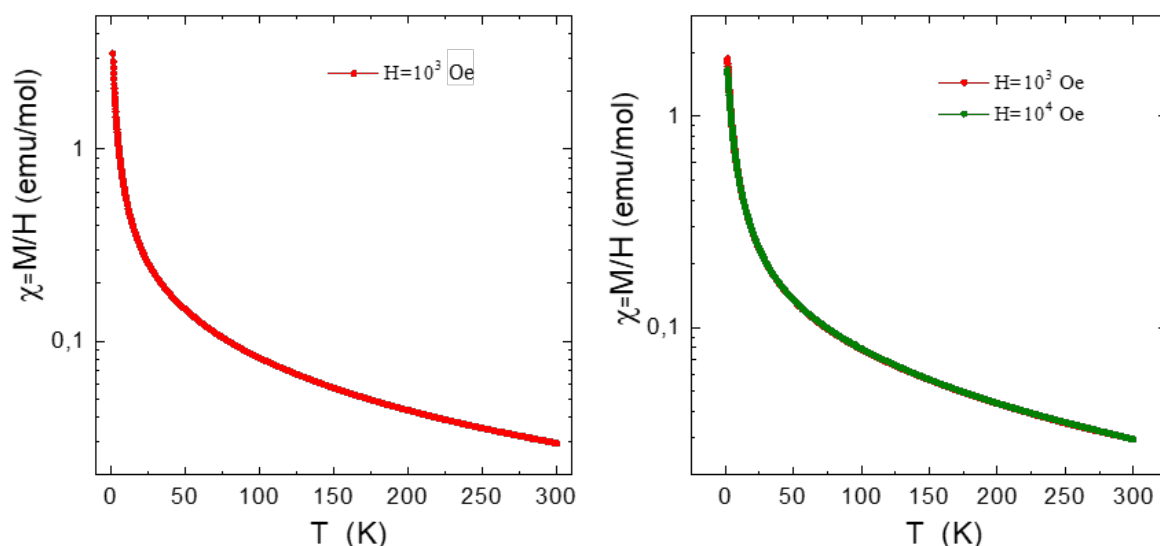

**Fig. S13.** Temperature dependences of the magnetic susceptibility for compounds **1** (left) and **2** (right). The magnetic susceptibility of both compounds exhibits dependence neither on magneto-thermal history, nor on the magnetic field value, except for the lowest temperatures where the curves measured at 1 and 10 kOe diverge slightly due to nonlinear  $M(H)$  dependence.

#### References:

1. Willems, T.F.; Rycroft, C.H.; Kazi, M. ; Meza, J.C.; Haranczyk, M. Algorithms and Tools for High-Throughput Geometry-Based Analysis of Crystalline Porous Materials. *Microporous Mesoporous Mater.* **2012**, *149*, 134-141.
2. Pinheiro, M.; Martin, R.L.; Rycroft, C.H.; Jones, A.; Iglesia, E.; Haranczyk, M. Characterization and Comparison of Pore Landscapes in Crystalline Porous Materials. *J. Mol. Graph. Model.* **2013**, *44* (2013) 208-219.
3. Myers, A.L.; Prausnitz, J.M.; Thermodynamics of Mixed-Gas Adsorption. *AIChE J.*, **1965**, *11*, 121–127.
