# Supplementary material for: 3D Metal–Organic Frameworks Based on Co(II) and Bithiophendicarboxylate: Synthesis, Crystal Structures, Gas Adsorption, and Magnetic Properties
Source: Molecules. 2021 Feb 26;26(5):1269. doi: 10.3390/molecules26051269 (PMC7956319; doi:10.3390/molecules26051269)
Supplement: Supplementary file 1 [file molecules-26-01269-s001.zip]

Archive with 8 entries (8 files):
- 1.cif
- 1.pdf
- 2.cif
- 2.pdf
- 3.cif
- 3.pdf
- SI.doc
- SI.pdf
