# Supplementary material for: 3D Metal–Organic Frameworks Based on Co(II) and Bithiophendicarboxylate: Synthesis, Crystal Structures, Gas Adsorption, and Magnetic Properties
Source: Molecules. 2021 Feb 26;26(5):1269. doi: 10.3390/molecules26051269 (PMC7956319; doi:10.3390/molecules26051269)
Supplement: Supplementary file 1 [file molecules-26-01269-s001.zip › 1.cif]

# [Co3(bipy)2(C10H4S2O4)3]*4DMF
data_ssk-1b

_audit_creation_method           SHELXL-2018/3
_shelx_SHELXL_version_number     2018/3
_chemical_name_systematic        ?
_chemical_name_common            ?
_chemical_melting_point          ?
_chemical_formula_moiety         ?
_chemical_formula_sum            'C62 H56 Co3 N8 O16 S6'
_chemical_formula_weight         1538.29

loop_
_atom_type_symbol
_atom_type_description
_atom_type_scat_dispersion_real
_atom_type_scat_dispersion_imag
_atom_type_scat_source
C C 0.0046 0.0022 'International Tables Vol C Tables 4.2.6.8 and 6.1.1.4'
H H 0.0000 0.0000 'International Tables Vol C Tables 4.2.6.8 and 6.1.1.4'
N N 0.0087 0.0044 'International Tables Vol C Tables 4.2.6.8 and 6.1.1.4'
O O 0.0147 0.0080 'International Tables Vol C Tables 4.2.6.8 and 6.1.1.4'
S S 0.1503 0.1565 'International Tables Vol C Tables 4.2.6.8 and 6.1.1.4'
Co Co 0.3455 1.1930 'International Tables Vol C Tables 4.2.6.8 and 6.1.1.4'

_space_group_crystal_system      monoclinic
_space_group_IT_number           14
_space_group_name_H-M_alt        'P 21/c'
_space_group_name_Hall           '-P 2ybc'

_shelx_space_group_comment       
;
The symmetry employed for this shelxl refinement is uniquely defined
by the following loop, which should always be used as a source of
symmetry information in preference to the above space-group names.
They are only intended as comments.
;

loop_
_space_group_symop_operation_xyz
'x, y, z'
'-x, y+1/2, -z+1/2'
'-x, -y, -z'
'x, -y-1/2, z-1/2'

_cell_length_a                   10.852(2)
_cell_length_b                   25.406(5)
_cell_length_c                   12.801(2)
_cell_angle_alpha                90
_cell_angle_beta                 109.74(3)
_cell_angle_gamma                90
_cell_volume                     3322.0(12)
_cell_formula_units_Z            2
_cell_measurement_temperature    100(2)
_cell_measurement_reflns_used    15755
_cell_measurement_theta_min      2.3
_cell_measurement_theta_max      30.0

_exptl_crystal_description       stick
_exptl_crystal_colour            red
_exptl_crystal_density_meas      ?
_exptl_crystal_density_method    ?
_exptl_crystal_density_diffrn    1.538
_exptl_crystal_F_000             1578
_exptl_transmission_factor_min   ?
_exptl_transmission_factor_max   ?
_exptl_crystal_size_max          0.15
_exptl_crystal_size_mid          0.15
_exptl_crystal_size_min          0.05
_exptl_absorpt_coefficient_mu    1.345
_shelx_estimated_absorpt_T_min   0.824
_shelx_estimated_absorpt_T_max   0.936
_exptl_absorpt_correction_type   multi-scan
_exptl_absorpt_correction_T_min  0.893
_exptl_absorpt_correction_T_max  1.000
_exptl_absorpt_process_details   'XDS (Kabsch, 2010)'
_exptl_absorpt_special_details   ?

_diffrn_radiation_source         synchrotron
_diffrn_radiation_monochromator  'Double Crystal Monochromator'
_diffrn_ambient_temperature      100(2)
_diffrn_radiation_wavelength     0.79313
_diffrn_radiation_type           synchrotron
_diffrn_source                   synchrotron
_diffrn_measurement_device_type  'Rayonix SX-165 CCD'
_diffrn_measurement_method       '\f scan'
_diffrn_detector_area_resol_mean 12.4
_diffrn_reflns_number            19683
_diffrn_reflns_av_unetI/netI     0.0572
_diffrn_reflns_av_R_equivalents  0.0514
_diffrn_reflns_limit_h_min       -13
_diffrn_reflns_limit_h_max       13
_diffrn_reflns_limit_k_min       -28
_diffrn_reflns_limit_k_max       32
_diffrn_reflns_limit_l_min       -16
_diffrn_reflns_limit_l_max       16
_diffrn_reflns_theta_min         2.398
_diffrn_reflns_theta_max         30.977
_diffrn_reflns_theta_full        28.500
_diffrn_measured_fraction_theta_max 0.963
_diffrn_measured_fraction_theta_full 0.970
_diffrn_reflns_Laue_measured_fraction_max 0.963
_diffrn_reflns_Laue_measured_fraction_full 0.970
_diffrn_reflns_point_group_measured_fraction_max 0.963
_diffrn_reflns_point_group_measured_fraction_full 0.970
_reflns_number_total             7317
_reflns_number_gt                6412
_reflns_threshold_expression     'I > 2\s(I)'
_reflns_Friedel_coverage         0.000
_reflns_Friedel_fraction_max     .
_reflns_Friedel_fraction_full    .

_reflns_special_details          
;
 Reflections were merged by SHELXL according to the crystal
 class for the calculation of statistics and refinement.
 
 _reflns_Friedel_fraction is defined as the number of unique
 Friedel pairs measured divided by the number that would be
 possible theoretically, ignoring centric projections and
 systematic absences.
;
_computing_data_collection       'Marccd (Doyle, 2011)'
_computing_cell_refinement       'XDS (Kabsch, 2010)'
_computing_data_reduction        'XDS (Kabsch, 2010)'
_computing_structure_solution    'SHELXT-2018 (Sheldrick, 2015)'
_computing_structure_refinement  'SHELXL-2018 (Sheldrick, 2015)'
_computing_molecular_graphics    'ShelXle (H\"ubschle, 2011)'
_computing_publication_material  'CIFTAB (Sheldrick, 2015)'

_refine_special_details          ?
_refine_ls_structure_factor_coef Fsqd
_refine_ls_matrix_type           full
_refine_ls_weighting_scheme      calc
_refine_ls_weighting_details     
'w=1/[\s^2^(Fo^2^)+(0.0754P)^2^+3.5550P] where P=(Fo^2^+2Fc^2^)/3'
_atom_sites_solution_primary     dual
_atom_sites_solution_secondary   difmap
_atom_sites_solution_hydrogens   geom
_refine_ls_hydrogen_treatment    constr
_refine_ls_extinction_method     'SHELXL-2018/3 (Sheldrick 2018)'
_refine_ls_extinction_coef       0.0106(10)
_refine_ls_extinction_expression Fc^*^=kFc[1+0.001xFc^2^\l^3^/sin(2\q)]^-1/4^
_refine_ls_number_reflns         7317
_refine_ls_number_parameters     530
_refine_ls_number_restraints     334
_refine_ls_R_factor_all          0.0575
_refine_ls_R_factor_gt           0.0506
_refine_ls_wR_factor_ref         0.1429
_refine_ls_wR_factor_gt          0.1375
_refine_ls_goodness_of_fit_ref   1.052
_refine_ls_restrained_S_all      1.126
_refine_ls_shift/su_max          0.001
_refine_ls_shift/su_mean         0.000

loop_
_atom_site_label
_atom_site_type_symbol
_atom_site_fract_x
_atom_site_fract_y
_atom_site_fract_z
_atom_site_U_iso_or_equiv
_atom_site_adp_type
_atom_site_occupancy
_atom_site_site_symmetry_order
_atom_site_calc_flag
_atom_site_refinement_flags_posn
_atom_site_refinement_flags_adp
_atom_site_refinement_flags_occupancy
_atom_site_disorder_assembly
_atom_site_disorder_group
Co1 Co 0.73770(4) 0.45794(2) 0.38634(3) 0.02402(13) Uani 1 1 d . . . . .
Co2 Co 0.500000 0.500000 0.500000 0.02186(14) Uani 1 2 d S . P . .
N1 N 0.8944(2) 0.42509(9) 0.35064(18) 0.0256(4) Uani 1 1 d . U . . .
N2 N 0.6553(3) 0.44154(14) 0.2133(2) 0.0451(6) Uani 1 1 d . U . . .
C1 C 1.0157(3) 0.42261(11) 0.4228(2) 0.0285(5) Uani 1 1 d . U . . .
H1 H 1.031344 0.433556 0.497115 0.034 Uiso 1 1 calc R U . . .
C2 C 1.1206(3) 0.40456(12) 0.3934(3) 0.0347(6) Uani 1 1 d . U . . .
H2 H 1.206507 0.403551 0.446336 0.042 Uiso 1 1 calc R U . . .
C3 C 1.0968(3) 0.38811(14) 0.2851(3) 0.0387(6) Uani 1 1 d . U . . .
H3 H 1.166493 0.375401 0.262926 0.046 Uiso 1 1 calc R U . . .
C4 C 0.9708(3) 0.39031(13) 0.2097(2) 0.0364(6) Uani 1 1 d . U . . .
H4 H 0.952447 0.378514 0.135550 0.044 Uiso 1 1 calc R U . . .
C5 C 0.8720(3) 0.41006(12) 0.2443(2) 0.0306(5) Uani 1 1 d . U . . .
C6 C 0.7356(3) 0.41704(15) 0.1685(2) 0.0416(6) Uani 1 1 d . U . . .
C7 C 0.6920(4) 0.40078(19) 0.0575(3) 0.0582(9) Uani 1 1 d . U . . .
H7 H 0.749635 0.383557 0.026869 0.070 Uiso 1 1 calc R U . . .
C8 C 0.5650(5) 0.4102(2) -0.0057(3) 0.0761(11) Uani 1 1 d . U . . .
H8 H 0.533715 0.400006 -0.081515 0.091 Uiso 1 1 calc R U . . .
C9 C 0.4816(5) 0.4346(2) 0.0407(4) 0.0814(11) Uani 1 1 d . U . . .
H9 H 0.392770 0.441120 -0.002474 0.098 Uiso 1 1 calc R U . . .
C10 C 0.5307(4) 0.4494(2) 0.1523(3) 0.0694(10) Uani 1 1 d . U . . .
H10 H 0.473764 0.465387 0.185239 0.083 Uiso 1 1 calc R U . . .
O11 O 0.84022(19) 0.46679(8) 0.54976(14) 0.0255(4) Uani 1 1 d . . . . .
O12 O 0.67491(19) 0.47998(8) 0.61624(15) 0.0275(4) Uani 1 1 d . . . . .
C11 C 0.7931(3) 0.47393(10) 0.6260(2) 0.0227(5) Uani 1 1 d . . . . .
C12 C 0.8875(3) 0.47664(11) 0.7408(2) 0.0256(5) Uani 1 1 d . . . . .
C13 C 1.0201(3) 0.47065(12) 0.7769(2) 0.0285(6) Uani 1 1 d . . . . .
H13 H 1.068445 0.461058 0.730241 0.034 Uiso 1 1 calc R U . . .
C14 C 1.0772(3) 0.48042(13) 0.8921(2) 0.0317(6) Uani 1 1 d . . . . .
H14 H 1.168662 0.478112 0.931011 0.038 Uiso 1 1 calc R U . . .
C15 C 0.9879(3) 0.49351(11) 0.9420(2) 0.0266(5) Uani 1 1 d . . . . .
S1 S 0.83115(7) 0.49347(3) 0.84736(5) 0.02806(17) Uani 1 1 d . . . . .
O21 O 0.6367(2) 0.39438(9) 0.4050(2) 0.0398(5) Uani 1 1 d . . . . .
O22 O 0.4606(2) 0.42112(8) 0.44675(16) 0.0277(4) Uani 1 1 d . . . . .
O23 O 0.41337(18) 0.01531(7) 0.12267(14) 0.0240(4) Uani 1 1 d . . . . .
O24 O 0.2364(2) 0.04054(8) 0.15608(16) 0.0286(4) Uani 1 1 d . . . . .
C201 C 0.5275(3) 0.38784(11) 0.4181(2) 0.0288(6) Uani 1 1 d . . . . .
C202 C 0.4752(3) 0.33360(12) 0.3921(2) 0.0301(6) Uani 1 1 d . . . . .
C203 C 0.3763(3) 0.30883(12) 0.4163(3) 0.0390(7) Uani 1 1 d . . . . .
H203 H 0.326776 0.324911 0.456247 0.047 Uiso 1 1 calc R U . . .
C204 C 0.3557(4) 0.25662(13) 0.3755(3) 0.0422(8) Uani 1 1 d . . . . .
H204 H 0.290416 0.233989 0.384672 0.051 Uiso 1 1 calc R U . . .
C205 C 0.4404(3) 0.24205(11) 0.3208(2) 0.0323(6) Uani 1 1 d . . . . .
C206 C 0.4502(3) 0.19166(11) 0.2705(2) 0.0309(6) Uani 1 1 d . . . . .
C207 C 0.5553(3) 0.17074(12) 0.2500(3) 0.0363(7) Uani 1 1 d . . . . .
H207 H 0.636278 0.188679 0.265389 0.044 Uiso 1 1 calc R U . . .
C208 C 0.5317(3) 0.11942(12) 0.2033(3) 0.0326(6) Uani 1 1 d . . . . .
H208 H 0.594936 0.099218 0.184559 0.039 Uiso 1 1 calc R U . . .
C209 C 0.4065(3) 0.10245(11) 0.1885(2) 0.0271(5) Uani 1 1 d . . . . .
C210 C 0.3481(3) 0.05081(11) 0.1522(2) 0.0242(5) Uani 1 1 d . . . . .
S21 S 0.54392(8) 0.29292(3) 0.31924(7) 0.0369(2) Uani 1 1 d . . . . .
S22 S 0.31794(7) 0.14915(3) 0.23122(6) 0.03055(18) Uani 1 1 d . . . . .
O1D O 0.8900(13) 0.3237(4) -0.0555(13) 0.069(2) Uani 0.480(3) 1 d D U P A 1
C11D C 0.9919(9) 0.3459(4) -0.0481(7) 0.0574(18) Uani 0.480(3) 1 d D U P A 1
H11D H 0.988239 0.376335 -0.092197 0.069 Uiso 0.480(3) 1 calc R U P A 1
N1D N 1.1088(8) 0.3296(3) 0.0192(6) 0.0658(18) Uani 0.480(3) 1 d D U P A 1
C12D C 1.137(2) 0.2778(5) 0.0746(16) 0.100(3) Uani 0.480(3) 1 d D U P A 1
H12A H 1.206260 0.281624 0.146883 0.150 Uiso 0.480(3) 1 calc R U P A 1
H12B H 1.165696 0.253244 0.028458 0.150 Uiso 0.480(3) 1 calc R U P A 1
H12C H 1.057606 0.264171 0.085375 0.150 Uiso 0.480(3) 1 calc R U P A 1
C13D C 1.2274(9) 0.3562(4) 0.0181(8) 0.070(3) Uani 0.480(3) 1 d D U P A 1
H13A H 1.269518 0.373543 0.089685 0.104 Uiso 0.480(3) 1 calc R U P A 1
H13B H 1.204788 0.382576 -0.041273 0.104 Uiso 0.480(3) 1 calc R U P A 1
H13C H 1.287716 0.330359 0.005048 0.104 Uiso 0.480(3) 1 calc R U P A 1
O1A O 0.8931(14) 0.3392(4) -0.0403(13) 0.077(2) Uani 0.520(3) 1 d D U P A 2
C11A C 0.9173(12) 0.2943(5) -0.0516(10) 0.091(3) Uani 0.520(3) 1 d D U P A 2
H11A H 0.845793 0.273331 -0.094710 0.109 Uiso 0.520(3) 1 calc R U P A 2
N1A N 1.0327(10) 0.2699(4) -0.0110(9) 0.103(2) Uani 0.520(3) 1 d D U P A 2
C12A C 1.1346(17) 0.2953(6) 0.0811(14) 0.099(3) Uani 0.520(3) 1 d D U P A 2
H12D H 1.216833 0.275777 0.097335 0.148 Uiso 0.520(3) 1 calc R U P A 2
H12E H 1.107901 0.295510 0.147020 0.148 Uiso 0.520(3) 1 calc R U P A 2
H12F H 1.147052 0.331535 0.060551 0.148 Uiso 0.520(3) 1 calc R U P A 2
C13A C 1.0446(17) 0.2153(5) -0.0445(15) 0.125(4) Uani 0.520(3) 1 d D U P A 2
H13D H 1.126698 0.211177 -0.059723 0.188 Uiso 0.520(3) 1 calc R U P A 2
H13E H 0.970639 0.206929 -0.111558 0.188 Uiso 0.520(3) 1 calc R U P A 2
H13F H 1.044283 0.191322 0.015433 0.188 Uiso 0.520(3) 1 calc R U P A 2
O2D O 0.7815(10) 0.2536(4) 0.1978(7) 0.093(2) Uani 0.480(3) 1 d D U P A 1
C21D C 0.7972(14) 0.2471(5) 0.1099(10) 0.080(2) Uani 0.480(3) 1 d D U P A 1
H21D H 0.763791 0.272391 0.052709 0.096 Uiso 0.480(3) 1 calc R U P A 1
N2D N 0.8609(11) 0.2049(4) 0.0912(8) 0.086(2) Uani 0.480(3) 1 d D U P A 1
C22D C 0.8976(15) 0.1601(4) 0.1647(10) 0.082(3) Uani 0.480(3) 1 d D U P A 1
H22A H 0.989480 0.151178 0.177575 0.124 Uiso 0.480(3) 1 calc R U P A 1
H22B H 0.842050 0.129991 0.130737 0.124 Uiso 0.480(3) 1 calc R U P A 1
H22C H 0.886343 0.168698 0.235496 0.124 Uiso 0.480(3) 1 calc R U P A 1
C23D C 0.8828(16) 0.1990(6) -0.0142(11) 0.108(3) Uani 0.480(3) 1 d D U P A 1
H23A H 0.963240 0.178827 -0.002921 0.163 Uiso 0.480(3) 1 calc R U P A 1
H23B H 0.891193 0.233808 -0.043969 0.163 Uiso 0.480(3) 1 calc R U P A 1
H23C H 0.808538 0.180298 -0.066765 0.163 Uiso 0.480(3) 1 calc R U P A 1
O2A O 1.0492(6) 0.2201(3) 0.2865(6) 0.0726(19) Uani 0.520(3) 1 d D U P A 2
C21A C 0.9459(8) 0.2424(4) 0.2449(7) 0.0633(18) Uani 0.520(3) 1 d D U P A 2
H21A H 0.937442 0.276234 0.273132 0.076 Uiso 0.520(3) 1 calc R U P A 2
N2A N 0.8428(6) 0.2241(2) 0.1633(5) 0.0516(13) Uani 0.520(3) 1 d D U P A 2
C22A C 0.8354(12) 0.1715(3) 0.1165(9) 0.073(2) Uani 0.520(3) 1 d D U P A 2
H22D H 0.774605 0.171596 0.039890 0.110 Uiso 0.520(3) 1 calc R U P A 2
H22E H 0.804312 0.146707 0.160766 0.110 Uiso 0.520(3) 1 calc R U P A 2
H22F H 0.922498 0.160696 0.117370 0.110 Uiso 0.520(3) 1 calc R U P A 2
C23A C 0.7224(8) 0.2561(4) 0.1112(7) 0.0589(18) Uani 0.520(3) 1 d D U P A 2
H23D H 0.699543 0.255312 0.030272 0.088 Uiso 0.520(3) 1 calc R U P A 2
H23E H 0.738366 0.292477 0.137454 0.088 Uiso 0.520(3) 1 calc R U P A 2
H23F H 0.650054 0.241361 0.131443 0.088 Uiso 0.520(3) 1 calc R U P A 2

loop_
_atom_site_aniso_label
_atom_site_aniso_U_11
_atom_site_aniso_U_22
_atom_site_aniso_U_33
_atom_site_aniso_U_23
_atom_site_aniso_U_13
_atom_site_aniso_U_12
Co1 0.0245(2) 0.0274(2) 0.01956(19) -0.00364(12) 0.00654(14) 0.00084(13)
Co2 0.0219(3) 0.0265(3) 0.0168(2) -0.00253(17) 0.00609(18) -0.00003(18)
N1 0.0282(11) 0.0254(10) 0.0233(9) -0.0019(8) 0.0088(8) -0.0002(8)
N2 0.0358(13) 0.0652(15) 0.0272(11) -0.0174(11) 0.0011(9) 0.0142(12)
C1 0.0312(13) 0.0256(11) 0.0276(11) -0.0022(9) 0.0083(9) 0.0023(9)
C2 0.0318(13) 0.0366(13) 0.0353(12) -0.0047(10) 0.0109(10) 0.0055(10)
C3 0.0382(14) 0.0436(14) 0.0359(13) -0.0051(11) 0.0148(11) 0.0069(11)
C4 0.0399(14) 0.0417(13) 0.0284(11) -0.0042(10) 0.0124(10) 0.0074(11)
C5 0.0349(12) 0.0346(12) 0.0225(10) -0.0032(9) 0.0098(9) 0.0044(10)
C6 0.0403(14) 0.0557(14) 0.0249(11) -0.0115(11) 0.0061(10) 0.0129(12)
C7 0.0515(17) 0.083(2) 0.0308(13) -0.0213(14) 0.0014(12) 0.0222(15)
C8 0.0591(19) 0.110(2) 0.0405(15) -0.0339(16) -0.0081(14) 0.0289(18)
C9 0.0535(19) 0.120(2) 0.0478(17) -0.0379(17) -0.0133(15) 0.0333(18)
C10 0.0457(17) 0.103(2) 0.0416(15) -0.0322(16) -0.0081(13) 0.0283(16)
O11 0.0249(10) 0.0331(10) 0.0187(8) -0.0012(7) 0.0074(7) -0.0003(7)
O12 0.0225(10) 0.0395(11) 0.0191(8) -0.0003(7) 0.0053(7) 0.0003(8)
C11 0.0242(13) 0.0248(12) 0.0189(11) 0.0001(9) 0.0070(9) -0.0001(9)
C12 0.0266(14) 0.0315(13) 0.0189(11) 0.0004(9) 0.0080(10) -0.0003(10)
C13 0.0286(15) 0.0361(14) 0.0209(12) 0.0004(10) 0.0085(10) 0.0033(11)
C14 0.0246(15) 0.0470(17) 0.0219(12) 0.0003(11) 0.0057(10) 0.0029(12)
C15 0.0238(14) 0.0344(14) 0.0196(12) 0.0007(10) 0.0045(9) 0.0007(10)
S1 0.0231(4) 0.0429(4) 0.0173(3) -0.0016(2) 0.0056(2) 0.0012(3)
O21 0.0372(13) 0.0313(11) 0.0582(14) -0.0167(10) 0.0259(11) -0.0082(9)
O22 0.0300(11) 0.0270(9) 0.0268(9) -0.0048(7) 0.0107(8) -0.0012(7)
O23 0.0256(10) 0.0272(9) 0.0203(8) 0.0003(7) 0.0093(7) -0.0007(7)
O24 0.0259(11) 0.0334(11) 0.0282(9) -0.0042(7) 0.0113(8) -0.0039(8)
C201 0.0306(15) 0.0314(14) 0.0247(12) -0.0064(10) 0.0098(10) -0.0038(11)
C202 0.0305(15) 0.0305(14) 0.0300(13) -0.0043(10) 0.0109(11) -0.0013(11)
C203 0.0396(18) 0.0288(15) 0.0548(19) -0.0020(13) 0.0240(15) -0.0023(12)
C204 0.046(2) 0.0280(15) 0.063(2) -0.0007(14) 0.0314(17) -0.0008(13)
C205 0.0344(16) 0.0268(14) 0.0358(14) -0.0018(11) 0.0121(12) -0.0006(11)
C206 0.0338(16) 0.0270(13) 0.0326(13) -0.0010(11) 0.0119(11) -0.0019(11)
C207 0.0327(17) 0.0287(14) 0.0517(18) -0.0068(13) 0.0198(13) -0.0077(12)
C208 0.0335(16) 0.0289(14) 0.0393(15) -0.0035(11) 0.0175(12) -0.0037(11)
C209 0.0307(15) 0.0278(13) 0.0233(12) 0.0003(10) 0.0098(10) -0.0009(10)
C210 0.0265(14) 0.0295(13) 0.0159(10) 0.0008(9) 0.0062(9) 0.0000(10)
S21 0.0435(5) 0.0315(4) 0.0436(4) -0.0134(3) 0.0250(3) -0.0106(3)
S22 0.0290(4) 0.0315(4) 0.0312(3) -0.0059(3) 0.0103(3) -0.0017(3)
O1D 0.099(4) 0.051(5) 0.062(4) -0.004(4) 0.035(3) 0.032(4)
C11D 0.079(4) 0.051(4) 0.049(3) -0.006(3) 0.031(3) 0.018(3)
N1D 0.081(4) 0.076(4) 0.044(3) -0.001(3) 0.025(3) 0.037(3)
C12D 0.113(6) 0.097(7) 0.080(5) 0.015(5) 0.021(5) 0.032(6)
C13D 0.069(6) 0.079(6) 0.054(4) -0.012(4) 0.011(4) 0.022(5)
O1A 0.108(4) 0.072(6) 0.061(4) -0.006(4) 0.039(3) 0.041(4)
C11A 0.107(5) 0.079(5) 0.083(4) -0.010(4) 0.027(4) 0.031(4)
N1A 0.111(5) 0.097(5) 0.096(4) -0.006(4) 0.029(4) 0.028(4)
C12A 0.109(6) 0.091(6) 0.092(5) -0.015(5) 0.029(5) 0.031(6)
C13A 0.126(7) 0.108(7) 0.135(7) -0.008(6) 0.034(6) 0.022(6)
O2D 0.102(4) 0.091(4) 0.084(4) 0.002(4) 0.029(4) -0.008(4)
C21D 0.090(4) 0.075(4) 0.077(4) 0.000(4) 0.030(4) -0.009(4)
N2D 0.087(4) 0.078(4) 0.094(4) 0.002(4) 0.030(4) 0.002(4)
C22D 0.094(6) 0.070(5) 0.077(5) 0.002(4) 0.021(5) -0.003(5)
C23D 0.110(7) 0.093(6) 0.120(7) -0.010(6) 0.037(6) 0.009(6)
O2A 0.039(3) 0.095(5) 0.076(4) 0.023(3) 0.010(3) -0.017(3)
C21A 0.063(4) 0.066(4) 0.059(4) 0.006(3) 0.019(3) -0.024(3)
N2A 0.063(3) 0.055(3) 0.044(3) 0.000(2) 0.028(2) -0.010(3)
C22A 0.084(5) 0.057(4) 0.074(4) 0.005(4) 0.020(4) -0.002(4)
C23A 0.063(4) 0.068(4) 0.048(3) 0.008(3) 0.022(3) -0.004(4)

_geom_special_details            
;
 All esds (except the esd in the dihedral angle between two l.s. planes)
 are estimated using the full covariance matrix.  The cell esds are taken
 into account individually in the estimation of esds in distances, angles
 and torsion angles; correlations between esds in cell parameters are only
 used when they are defined by crystal symmetry.  An approximate (isotropic)
 treatment of cell esds is used for estimating esds involving l.s. planes.
;

loop_
_geom_bond_atom_site_label_1
_geom_bond_atom_site_label_2
_geom_bond_distance
_geom_bond_site_symmetry_2
_geom_bond_publ_flag
Co1 N1 2.079(2) . yes
Co1 N2 2.131(3) . yes
Co1 O11 2.0231(19) . yes
Co1 O21 2.011(2) . yes
Co1 O23 2.1672(19) 2_655 yes
Co1 O24 2.209(2) 2_655 yes
Co2 O12 2.042(2) . yes
Co2 O12 2.042(2) 3_666 ?
Co2 O22 2.1134(19) . yes
Co2 O22 2.1134(19) 3_666 ?
Co2 O23 2.1209(18) 2_655 yes
Co2 O23 2.1209(18) 4_566 ?
N1 C1 1.330(4) . ?
N1 C5 1.354(3) . ?
N2 C6 1.347(4) . ?
N2 C10 1.328(5) . ?
C1 H1 0.9500 . ?
C1 C2 1.391(4) . ?
C2 H2 0.9500 . ?
C2 C3 1.386(4) . ?
C3 H3 0.9500 . ?
C3 C4 1.383(5) . ?
C4 H4 0.9500 . ?
C4 C5 1.386(4) . ?
C5 C6 1.481(4) . ?
C6 C7 1.399(4) . ?
C7 H7 0.9500 . ?
C7 C8 1.363(6) . ?
C8 H8 0.9500 . ?
C8 C9 1.386(6) . ?
C9 H9 0.9500 . ?
C9 C10 1.396(5) . ?
C10 H10 0.9500 . ?
O11 C11 1.259(3) . ?
O12 C11 1.255(3) . ?
C11 C12 1.483(3) . ?
C12 C13 1.363(4) . ?
C12 S1 1.726(3) . ?
C13 H13 0.9500 . ?
C13 C14 1.415(4) . ?
C14 H14 0.9500 . ?
C14 C15 1.370(4) . ?
C15 C15 1.456(5) 3_767 ?
C15 S1 1.723(3) . ?
O21 C201 1.262(4) . ?
O22 C201 1.247(3) . ?
O23 C210 1.281(3) . ?
O24 C210 1.257(3) . ?
C201 C202 1.485(4) . ?
C202 C203 1.367(4) . ?
C202 S21 1.722(3) . ?
C203 H203 0.9500 . ?
C203 C204 1.416(4) . ?
C204 H204 0.9500 . ?
C204 C205 1.381(4) . ?
C205 C206 1.453(4) . ?
C205 S21 1.717(3) . ?
C206 C207 1.361(4) . ?
C206 S22 1.730(3) . ?
C207 H207 0.9500 . ?
C207 C208 1.421(4) . ?
C208 H208 0.9500 . ?
C208 C209 1.376(4) . ?
C209 C210 1.463(4) . ?
C209 S22 1.728(3) . ?
O1D C11D 1.217(10) . ?
C11D H11D 0.9500 . ?
C11D N1D 1.336(8) . ?
N1D C12D 1.478(8) . ?
N1D C13D 1.458(8) . ?
C12D H12A 0.9800 . ?
C12D H12B 0.9800 . ?
C12D H12C 0.9800 . ?
C13D H13A 0.9800 . ?
C13D H13B 0.9800 . ?
C13D H13C 0.9800 . ?
O1A C11A 1.191(9) . ?
C11A H11A 0.9500 . ?
C11A N1A 1.337(9) . ?
N1A C12A 1.465(9) . ?
N1A C13A 1.470(8) . ?
C12A H12D 0.9800 . ?
C12A H12E 0.9800 . ?
C12A H12F 0.9800 . ?
C13A H13D 0.9800 . ?
C13A H13E 0.9800 . ?
C13A H13F 0.9800 . ?
O2D C21D 1.204(9) . ?
C21D H21D 0.9500 . ?
C21D N2D 1.340(10) . ?
N2D C22D 1.444(8) . ?
N2D C23D 1.455(8) . ?
C22D H22A 0.9800 . ?
C22D H22B 0.9800 . ?
C22D H22C 0.9800 . ?
C23D H23A 0.9800 . ?
C23D H23B 0.9800 . ?
C23D H23C 0.9800 . ?
O2A C21A 1.207(8) . ?
C21A H21A 0.9500 . ?
C21A N2A 1.330(8) . ?
N2A C22A 1.457(8) . ?
N2A C23A 1.491(7) . ?
C22A H22D 0.9800 . ?
C22A H22E 0.9800 . ?
C22A H22F 0.9800 . ?
C23A H23D 0.9800 . ?
C23A H23E 0.9800 . ?
C23A H23F 0.9800 . ?

loop_
_geom_angle_atom_site_label_1
_geom_angle_atom_site_label_2
_geom_angle_atom_site_label_3
_geom_angle
_geom_angle_site_symmetry_1
_geom_angle_site_symmetry_3
_geom_angle_publ_flag
N1 Co1 N2 77.30(10) . . ?
N1 Co1 O23 156.70(8) . 2_655 ?
N1 Co1 O24 98.38(8) . 2_655 ?
N2 Co1 O23 91.83(9) . 2_655 ?
N2 Co1 O24 88.50(11) . 2_655 ?
O11 Co1 N1 93.84(9) . . ?
O11 Co1 N2 170.99(10) . . ?
O11 Co1 O23 97.03(8) . 2_655 ?
O11 Co1 O24 94.44(8) . 2_655 ?
O21 Co1 N1 102.88(9) . . ?
O21 Co1 N2 84.97(12) . . ?
O21 Co1 O11 95.61(9) . . ?
O21 Co1 O23 96.51(8) . 2_655 ?
O21 Co1 O24 155.76(9) . 2_655 ?
O23 Co1 O24 60.34(7) 2_655 2_655 ?
O12 Co2 O12 180.00(16) 3_666 . ?
O12 Co2 O22 87.95(8) . 3_666 ?
O12 Co2 O22 87.95(8) 3_666 . ?
O12 Co2 O22 92.05(8) . . ?
O12 Co2 O22 92.05(8) 3_666 3_666 ?
O12 Co2 O23 87.14(7) . 4_566 ?
O12 Co2 O23 87.14(7) 3_666 2_655 ?
O12 Co2 O23 92.86(7) . 2_655 ?
O12 Co2 O23 92.86(7) 3_666 4_566 ?
O22 Co2 O22 180.0 3_666 . ?
O22 Co2 O23 88.46(7) . 4_566 ?
O22 Co2 O23 88.46(7) 3_666 2_655 ?
O22 Co2 O23 91.54(7) . 2_655 ?
O22 Co2 O23 91.54(7) 3_666 4_566 ?
O23 Co2 O23 180.0 4_566 2_655 ?
C1 N1 Co1 123.91(18) . . ?
C1 N1 C5 118.9(2) . . ?
C5 N1 Co1 116.86(19) . . ?
C6 N2 Co1 115.4(2) . . ?
C10 N2 Co1 124.6(2) . . ?
C10 N2 C6 119.7(3) . . ?
N1 C1 H1 118.8 . . ?
N1 C1 C2 122.4(3) . . ?
C2 C1 H1 118.8 . . ?
C1 C2 H2 120.8 . . ?
C3 C2 C1 118.5(3) . . ?
C3 C2 H2 120.8 . . ?
C2 C3 H3 120.2 . . ?
C4 C3 C2 119.5(3) . . ?
C4 C3 H3 120.2 . . ?
C3 C4 H4 120.6 . . ?
C3 C4 C5 118.7(3) . . ?
C5 C4 H4 120.6 . . ?
N1 C5 C4 121.9(3) . . ?
N1 C5 C6 115.2(3) . . ?
C4 C5 C6 122.9(3) . . ?
N2 C6 C5 115.0(3) . . ?
N2 C6 C7 121.5(3) . . ?
C7 C6 C5 123.4(3) . . ?
C6 C7 H7 120.7 . . ?
C8 C7 C6 118.6(4) . . ?
C8 C7 H7 120.7 . . ?
C7 C8 H8 120.0 . . ?
C7 C8 C9 120.0(4) . . ?
C9 C8 H8 120.0 . . ?
C8 C9 H9 120.7 . . ?
C8 C9 C10 118.6(4) . . ?
C10 C9 H9 120.7 . . ?
N2 C10 C9 121.5(4) . . ?
N2 C10 H10 119.2 . . ?
C9 C10 H10 119.2 . . ?
C11 O11 Co1 126.31(18) . . ?
C11 O12 Co2 140.38(17) . . ?
O11 C11 C12 116.7(2) . . ?
O12 C11 O11 127.6(2) . . ?
O12 C11 C12 115.7(2) . . ?
C11 C12 S1 118.9(2) . . ?
C13 C12 C11 128.9(2) . . ?
C13 C12 S1 112.0(2) . . ?
C12 C13 H13 124.0 . . ?
C12 C13 C14 112.0(2) . . ?
C14 C13 H13 124.0 . . ?
C13 C14 H14 123.2 . . ?
C15 C14 C13 113.5(3) . . ?
C15 C14 H14 123.2 . . ?
C14 C15 C15 128.2(3) . 3_767 ?
C14 C15 S1 111.0(2) . . ?
C15 C15 S1 120.8(3) 3_767 . ?
C15 S1 C12 91.50(13) . . ?
C201 O21 Co1 134.0(2) . . ?
C201 O22 Co2 131.55(19) . . ?
Co2 O23 Co1 110.72(8) 2_645 2_645 ?
C210 O23 Co1 90.30(16) . 2_645 ?
C210 O23 Co2 140.88(17) . 2_645 ?
C210 O24 Co1 89.02(16) . 2_645 ?
O21 C201 C202 113.4(3) . . ?
O22 C201 O21 128.0(3) . . ?
O22 C201 C202 118.6(3) . . ?
C201 C202 S21 118.4(2) . . ?
C203 C202 C201 130.3(3) . . ?
C203 C202 S21 111.3(2) . . ?
C202 C203 H203 123.6 . . ?
C202 C203 C204 112.7(3) . . ?
C204 C203 H203 123.6 . . ?
C203 C204 H204 123.5 . . ?
C205 C204 C203 112.9(3) . . ?
C205 C204 H204 123.5 . . ?
C204 C205 C206 128.4(3) . . ?
C204 C205 S21 110.7(2) . . ?
C206 C205 S21 120.8(2) . . ?
C205 C206 S22 120.1(2) . . ?
C207 C206 C205 128.4(3) . . ?
C207 C206 S22 111.5(2) . . ?
C206 C207 H207 123.3 . . ?
C206 C207 C208 113.3(3) . . ?
C208 C207 H207 123.3 . . ?
C207 C208 H208 124.0 . . ?
C209 C208 C207 112.0(3) . . ?
C209 C208 H208 124.0 . . ?
C208 C209 C210 128.8(3) . . ?
C208 C209 S22 111.7(2) . . ?
C210 C209 S22 119.2(2) . . ?
O23 C210 C209 120.1(2) . . ?
O24 C210 O23 120.2(2) . . ?
O24 C210 C209 119.6(2) . . ?
C205 S21 C202 92.34(15) . . ?
C209 S22 C206 91.42(14) . . ?
O1D C11D H11D 118.4 . . ?
O1D C11D N1D 123.2(11) . . ?
N1D C11D H11D 118.4 . . ?
C11D N1D C12D 125.7(11) . . ?
C11D N1D C13D 120.0(8) . . ?
C13D N1D C12D 112.2(11) . . ?
N1D C12D H12A 109.5 . . ?
N1D C12D H12B 109.5 . . ?
N1D C12D H12C 109.5 . . ?
H12A C12D H12B 109.5 . . ?
H12A C12D H12C 109.5 . . ?
H12B C12D H12C 109.5 . . ?
N1D C13D H13A 109.5 . . ?
N1D C13D H13B 109.5 . . ?
N1D C13D H13C 109.5 . . ?
H13A C13D H13B 109.5 . . ?
H13A C13D H13C 109.5 . . ?
H13B C13D H13C 109.5 . . ?
O1A C11A H11A 116.0 . . ?
O1A C11A N1A 128.0(15) . . ?
N1A C11A H11A 116.0 . . ?
C11A N1A C12A 117.4(11) . . ?
C11A N1A C13A 119.2(11) . . ?
C12A N1A C13A 122.3(11) . . ?
N1A C12A H12D 109.5 . . ?
N1A C12A H12E 109.5 . . ?
N1A C12A H12F 109.5 . . ?
H12D C12A H12E 109.5 . . ?
H12D C12A H12F 109.5 . . ?
H12E C12A H12F 109.5 . . ?
N1A C13A H13D 109.5 . . ?
N1A C13A H13E 109.5 . . ?
N1A C13A H13F 109.5 . . ?
H13D C13A H13E 109.5 . . ?
H13D C13A H13F 109.5 . . ?
H13E C13A H13F 109.5 . . ?
O2D C21D H21D 119.3 . . ?
O2D C21D N2D 121.4(13) . . ?
N2D C21D H21D 119.3 . . ?
C21D N2D C22D 124.0(11) . . ?
C21D N2D C23D 120.3(10) . . ?
C22D N2D C23D 115.3(11) . . ?
N2D C22D H22A 109.5 . . ?
N2D C22D H22B 109.5 . . ?
N2D C22D H22C 109.5 . . ?
H22A C22D H22B 109.5 . . ?
H22A C22D H22C 109.5 . . ?
H22B C22D H22C 109.5 . . ?
N2D C23D H23A 109.5 . . ?
N2D C23D H23B 109.5 . . ?
N2D C23D H23C 109.5 . . ?
H23A C23D H23B 109.5 . . ?
H23A C23D H23C 109.5 . . ?
H23B C23D H23C 109.5 . . ?
O2A C21A H21A 116.8 . . ?
O2A C21A N2A 126.4(9) . . ?
N2A C21A H21A 116.8 . . ?
C21A N2A C22A 123.9(8) . . ?
C21A N2A C23A 122.7(7) . . ?
C22A N2A C23A 113.4(7) . . ?
N2A C22A H22D 109.5 . . ?
N2A C22A H22E 109.5 . . ?
N2A C22A H22F 109.5 . . ?
H22D C22A H22E 109.5 . . ?
H22D C22A H22F 109.5 . . ?
H22E C22A H22F 109.5 . . ?
N2A C23A H23D 109.5 . . ?
N2A C23A H23E 109.5 . . ?
N2A C23A H23F 109.5 . . ?
H23D C23A H23E 109.5 . . ?
H23D C23A H23F 109.5 . . ?
H23E C23A H23F 109.5 . . ?

_refine_diff_density_max         0.723
_refine_diff_density_min         -0.738
_refine_diff_density_rms         0.094

_shelx_res_file                  
;
TITL ssk-1b in P2(1)/c; 100K; Moscow
    ssk-1b.res
    created by SHELXL-2018/3 at 17:58:50 on 31-Jan-2020
CELL 0.79313   10.852   25.406   12.801   90   109.737   90
ZERR   2.000    0.002    0.005    0.002    0     0.031    0
LATT 1
SYMM -X,0.5+Y,0.5-Z
SFAC C   H   N  O  S  Co
DISP C  0.00462  0.00217 14.32469
DISP H -0.00002  0.00000  0.66622
DISP N  0.00868  0.00437 25.35309
DISP O  0.01466  0.00796 42.75456
DISP S  0.15032  0.15653 721.34853
DISP Co  0.34553  1.19303 5397.21997
UNIT 124 112 16 32 12 6
 
LIST 4 ! automatically inserted. Change 6 to 4 for CHECKCIF!!
TEMP -173
 
L.S. 6
BOND $H
FMAP 2
PLAN 5
 
OMIT 0
 
OMIT -8 6 2
OMIT 2 14 0
OMIT -9 11 3
OMIT -1 7 1
OMIT -4 1 1
 
OMIT  1   0   2
OMIT -1   2   2
 
ACTA 57
 
SIMU 0.003 0.004 N1 > C10
 
SIMU 0.01 0.01 O1D > C23A
 
SADI 0.01 O1D C11D  O1A C11A  O2D C21D  O2A C21A
SADI 0.01 N1D C11D  N1A C11A  N2D C21D  N2A C21A
SADI 0.01 N1D C12D  N1D C13D  N1A C12A  N1A C13A =
          N2D C22D  N2D C23D  N2A C22A  N2A C23A
 
SIZE 0.15 0.15 0.05
 
WGHT    0.075400    3.555000
EXTI    0.010556
FVAR       0.47905   0.48031
CO1   6    0.737696    0.457944    0.386338    11.00000    0.02446    0.02737 =
         0.01956   -0.00364    0.00654    0.00084
CO2   6    0.500000    0.500000    0.500000    10.50000    0.02195    0.02650 =
         0.01678   -0.00253    0.00609   -0.00003
N1    3    0.894365    0.425093    0.350641    11.00000    0.02815    0.02545 =
         0.02327   -0.00187    0.00879   -0.00021
N2    3    0.655315    0.441537    0.213298    11.00000    0.03582    0.06516 =
         0.02719   -0.01744    0.00115    0.01419
C1    1    1.015712    0.422607    0.422785    11.00000    0.03122    0.02557 =
         0.02761   -0.00224    0.00834    0.00234
AFIX  43
H1    2    1.031344    0.433556    0.497115    11.00000   -1.20000
AFIX   0
C2    1    1.120582    0.404564    0.393405    11.00000    0.03179    0.03665 =
         0.03532   -0.00472    0.01086    0.00552
AFIX  43
H2    2    1.206507    0.403551    0.446336    11.00000   -1.20000
AFIX   0
C3    1    1.096794    0.388106    0.285146    11.00000    0.03821    0.04359 =
         0.03592   -0.00509    0.01481    0.00692
AFIX  43
H3    2    1.166493    0.375401    0.262926    11.00000   -1.20000
AFIX   0
C4    1    0.970844    0.390311    0.209693    11.00000    0.03986    0.04172 =
         0.02843   -0.00418    0.01240    0.00735
AFIX  43
H4    2    0.952447    0.378514    0.135550    11.00000   -1.20000
AFIX   0
C5    1    0.872000    0.410058    0.244326    11.00000    0.03491    0.03461 =
         0.02251   -0.00324    0.00982    0.00443
C6    1    0.735637    0.417043    0.168479    11.00000    0.04033    0.05568 =
         0.02493   -0.01153    0.00611    0.01288
C7    1    0.691983    0.400782    0.057508    11.00000    0.05153    0.08262 =
         0.03080   -0.02130    0.00135    0.02216
AFIX  43
H7    2    0.749635    0.383557    0.026869    11.00000   -1.20000
AFIX   0
C8    1    0.565031    0.410184   -0.005653    11.00000    0.05913    0.10961 =
         0.04047   -0.03385   -0.00813    0.02895
AFIX  43
H8    2    0.533715    0.400006   -0.081515    11.00000   -1.20000
AFIX   0
C9    1    0.481594    0.434582    0.040725    11.00000    0.05350    0.11971 =
         0.04777   -0.03795   -0.01328    0.03332
AFIX  43
H9    2    0.392770    0.441120   -0.002474    11.00000   -1.20000
AFIX   0
C10   1    0.530734    0.449364    0.152256    11.00000    0.04571    0.10344 =
         0.04162   -0.03225   -0.00813    0.02833
AFIX  43
H10   2    0.473764    0.465387    0.185239    11.00000   -1.20000
AFIX   0
O11   4    0.840223    0.466789    0.549763    11.00000    0.02491    0.03311 =
         0.01867   -0.00125    0.00742   -0.00026
O12   4    0.674911    0.479980    0.616243    11.00000    0.02253    0.03952 =
         0.01913   -0.00031    0.00528    0.00035
C11   1    0.793059    0.473935    0.626016    11.00000    0.02421    0.02484 =
         0.01886    0.00015    0.00705   -0.00005
C12   1    0.887533    0.476642    0.740830    11.00000    0.02655    0.03151 =
         0.01891    0.00040    0.00800   -0.00030
C13   1    1.020119    0.470650    0.776889    11.00000    0.02857    0.03611 =
         0.02087    0.00044    0.00847    0.00331
AFIX  43
H13   2    1.068445    0.461058    0.730241    11.00000   -1.20000
AFIX   0
C14   1    1.077222    0.480416    0.892066    11.00000    0.02461    0.04700 =
         0.02190    0.00028    0.00574    0.00287
AFIX  43
H14   2    1.168662    0.478112    0.931011    11.00000   -1.20000
AFIX   0
C15   1    0.987930    0.493513    0.941986    11.00000    0.02377    0.03436 =
         0.01961    0.00068    0.00451    0.00067
S1    5    0.831150    0.493466    0.847361    11.00000    0.02310    0.04286 =
         0.01730   -0.00158    0.00563    0.00123
O21   4    0.636697    0.394382    0.405019    11.00000    0.03722    0.03125 =
         0.05824   -0.01675    0.02589   -0.00817
O22   4    0.460645    0.421119    0.446749    11.00000    0.03001    0.02700 =
         0.02683   -0.00475    0.01065   -0.00115
O23   4    0.413371    0.015308    0.122671    11.00000    0.02560    0.02724 =
         0.02033    0.00029    0.00926   -0.00075
O24   4    0.236366    0.040535    0.156079    11.00000    0.02587    0.03341 =
         0.02824   -0.00417    0.01134   -0.00389
C201  1    0.527514    0.387843    0.418099    11.00000    0.03065    0.03135 =
         0.02470   -0.00644    0.00980   -0.00378
C202  1    0.475183    0.333604    0.392130    11.00000    0.03049    0.03046 =
         0.02998   -0.00430    0.01089   -0.00133
C203  1    0.376308    0.308833    0.416323    11.00000    0.03963    0.02882 =
         0.05481   -0.00199    0.02401   -0.00226
AFIX  43
H203  2    0.326776    0.324911    0.456247    11.00000   -1.20000
AFIX   0
C204  1    0.355678    0.256619    0.375454    11.00000    0.04570    0.02801 =
         0.06296   -0.00074    0.03141   -0.00078
AFIX  43
H204  2    0.290416    0.233989    0.384672    11.00000   -1.20000
AFIX   0
C205  1    0.440408    0.242049    0.320780    11.00000    0.03436    0.02684 =
         0.03577   -0.00178    0.01211   -0.00061
C206  1    0.450197    0.191655    0.270470    11.00000    0.03378    0.02699 =
         0.03263   -0.00104    0.01195   -0.00189
C207  1    0.555258    0.170743    0.249997    11.00000    0.03266    0.02875 =
         0.05174   -0.00684    0.01976   -0.00774
AFIX  43
H207  2    0.636278    0.188679    0.265389    11.00000   -1.20000
AFIX   0
C208  1    0.531738    0.119415    0.203313    11.00000    0.03354    0.02889 =
         0.03927   -0.00354    0.01753   -0.00371
AFIX  43
H208  2    0.594936    0.099218    0.184559    11.00000   -1.20000
AFIX   0
C209  1    0.406537    0.102446    0.188503    11.00000    0.03073    0.02780 =
         0.02328    0.00029    0.00979   -0.00085
C210  1    0.348091    0.050808    0.152245    11.00000    0.02651    0.02954 =
         0.01587    0.00082    0.00624    0.00005
S21   5    0.543920    0.292919    0.319242    11.00000    0.04348    0.03153 =
         0.04358   -0.01337    0.02498   -0.01062
S22   5    0.317943    0.149153    0.231225    11.00000    0.02904    0.03151 =
         0.03122   -0.00591    0.01033   -0.00169
PART 1  21
O1D   4    0.889973    0.323733   -0.055486    21.00000    0.09933    0.05146 =
         0.06185   -0.00419    0.03460    0.03247
C11D  1    0.991934    0.345925   -0.048054    21.00000    0.07929    0.05123 =
         0.04924   -0.00568    0.03147    0.01758
AFIX  43
H11D  2    0.988239    0.376335   -0.092197    21.00000   -1.20000
AFIX   0
N1D   3    1.108834    0.329603    0.019173    21.00000    0.08058    0.07588 =
         0.04380   -0.00135    0.02479    0.03687
C12D  1    1.136967    0.277799    0.074642    21.00000    0.11300    0.09719 =
         0.07993    0.01534    0.02051    0.03166
AFIX 137
H12A  2    1.206260    0.281624    0.146883    21.00000   -1.50000
H12B  2    1.165696    0.253244    0.028458    21.00000   -1.50000
H12C  2    1.057606    0.264171    0.085375    21.00000   -1.50000
AFIX   0
C13D  1    1.227434    0.356200    0.018068    21.00000    0.06911    0.07857 =
         0.05403   -0.01226    0.01138    0.02199
AFIX 137
H13A  2    1.269518    0.373543    0.089685    21.00000   -1.50000
H13B  2    1.204788    0.382576   -0.041273    21.00000   -1.50000
H13C  2    1.287716    0.330359    0.005048    21.00000   -1.50000
AFIX   0
PART 2 -21
O1A   4    0.893061    0.339249   -0.040251   -21.00000    0.10803    0.07160 =
         0.06069   -0.00646    0.03903    0.04116
C11A  1    0.917279    0.294341   -0.051551   -21.00000    0.10673    0.07901 =
         0.08350   -0.01042    0.02662    0.03115
AFIX  43
H11A  2    0.845793    0.273331   -0.094710   -21.00000   -1.20000
AFIX   0
N1A   3    1.032722    0.269859   -0.010957   -21.00000    0.11074    0.09749 =
         0.09619   -0.00581    0.02885    0.02827
C12A  1    1.134562    0.295275    0.081113   -21.00000    0.10878    0.09069 =
         0.09225   -0.01518    0.02892    0.03107
AFIX 137
H12D  2    1.216833    0.275777    0.097335   -21.00000   -1.50000
H12E  2    1.107901    0.295510    0.147020   -21.00000   -1.50000
H12F  2    1.147052    0.331535    0.060551   -21.00000   -1.50000
AFIX   0
C13A  1    1.044573    0.215271   -0.044497   -21.00000    0.12603    0.10771 =
         0.13482   -0.00782    0.03435    0.02221
AFIX 137
H13D  2    1.126698    0.211177   -0.059723   -21.00000   -1.50000
H13E  2    0.970639    0.206929   -0.111558   -21.00000   -1.50000
H13F  2    1.044283    0.191322    0.015433   -21.00000   -1.50000
AFIX   0
PART 1  21
O2D   4    0.781465    0.253578    0.197778    21.00000    0.10214    0.09101 =
         0.08408    0.00249    0.02907   -0.00767
C21D  1    0.797225    0.247075    0.109939    21.00000    0.09045    0.07514 =
         0.07652   -0.00012    0.03048   -0.00894
AFIX  43
H21D  2    0.763791    0.272391    0.052709    21.00000   -1.20000
AFIX   0
N2D   3    0.860932    0.204880    0.091223    21.00000    0.08687    0.07790 =
         0.09408    0.00155    0.02984    0.00248
C22D  1    0.897650    0.160090    0.164654    21.00000    0.09425    0.06969 =
         0.07727    0.00210    0.02080   -0.00277
AFIX 137
H22A  2    0.989480    0.151178    0.177575    21.00000   -1.50000
H22B  2    0.842050    0.129991    0.130737    21.00000   -1.50000
H22C  2    0.886343    0.168698    0.235496    21.00000   -1.50000
AFIX   0
C23D  1    0.882756    0.198971   -0.014208    21.00000    0.11040    0.09305 =
         0.12048   -0.01015    0.03724    0.00860
AFIX 137
H23A  2    0.963240    0.178827   -0.002921    21.00000   -1.50000
H23B  2    0.891193    0.233808   -0.043969    21.00000   -1.50000
H23C  2    0.808538    0.180298   -0.066765    21.00000   -1.50000
AFIX   0
PART 2 -21
O2A   4    1.049206    0.220118    0.286532   -21.00000    0.03941    0.09474 =
         0.07607    0.02260    0.00967   -0.01739
C21A  1    0.945908    0.242358    0.244868   -21.00000    0.06281    0.06638 =
         0.05948    0.00591    0.01898   -0.02389
AFIX  43
H21A  2    0.937442    0.276234    0.273132   -21.00000   -1.20000
AFIX   0
N2A   3    0.842770    0.224121    0.163298   -21.00000    0.06332    0.05473 =
         0.04410    0.00030    0.02789   -0.00994
C22A  1    0.835447    0.171472    0.116502   -21.00000    0.08382    0.05744 =
         0.07352    0.00527    0.01975   -0.00231
AFIX 137
H22D  2    0.774605    0.171596    0.039890   -21.00000   -1.50000
H22E  2    0.804312    0.146707    0.160766   -21.00000   -1.50000
H22F  2    0.922498    0.160696    0.117370   -21.00000   -1.50000
AFIX   0
C23A  1    0.722374    0.256052    0.111151   -21.00000    0.06285    0.06830 =
         0.04792    0.00766    0.02191   -0.00401
AFIX 137
H23D  2    0.699543    0.255312    0.030272   -21.00000   -1.50000
H23E  2    0.738366    0.292477    0.137454   -21.00000   -1.50000
H23F  2    0.650054    0.241361    0.131443   -21.00000   -1.50000
PART 0
AFIX   0
HKLF 4
 
 
 
 
REM  ssk-1b in P2(1)/c; 100K; Moscow
REM wR2 = 0.1429, GooF = S = 1.052, Restrained GooF = 1.126 for all data
REM R1 = 0.0506 for 6412 Fo > 4sig(Fo) and 0.0575 for all 7317 data
REM 530 parameters refined using 334 restraints
 
END
 
WGHT      0.0753      3.5537
 
REM Highest difference peak  0.723,  deepest hole -0.738,  1-sigma level  0.094
Q1    1   0.5033  0.4597  0.0307  11.00000  0.05    0.72
Q2    1   0.4625  0.4124  0.0610  11.00000  0.05    0.62
Q3    1   1.0814  0.3100  0.0204  11.00000  0.05    0.53
Q4    1   0.8983  0.1912  0.2788  11.00000  0.05    0.46
Q5    1   0.5409  0.4708  0.1362  11.00000  0.05    0.44
;
_shelx_res_checksum              52507

_shelx_hkl_file                  
;
   0   3   0   -1.01    2.16
   0   5   0    3.80    3.23
   0   6   0  306.20   22.10
   0   7   0    4.96    4.11
   0   8   0  181.00   13.71
   0   9   0   -3.51    3.52
   0  10   0  621.20   43.79
   0  11   0   10.74    3.67
   0  12   0  176.60   13.35
   0  13   0    0.83    3.26
   0  14   0  552.40   39.13
   0  15   0    2.06    3.11
   0  16   0  426.60   30.43
   0  17   0    3.35    3.22
   0  18   0   33.28    4.55
   0  19   0   -0.43    3.23
   0  20   0 1326.00   92.55
   0  21   0   -7.17    3.60
   0  22   0   12.19    4.07
   0  23   0    4.04    3.92
   0  24   0  784.80   55.23
   0  25   0    1.31    3.76
   0  26   0  460.60   32.77
   0  27   0    3.25    3.32
   0  28   0  353.70   25.47
   0  29   0    3.57    3.27
   0  30   0    4.03    3.27
   0  31   0   -1.02    2.69
   0  32   0   63.32    5.93
   0  32   1   29.87    4.19
   0  31   1    9.34    3.50
   0  30   1  129.50   10.21
   0  29   1   73.02    6.88
   0  28   1   10.65    4.00
   0  27   1  181.00   13.89
   0  26   1  113.60    9.32
   0  25   1  374.00   26.93
   0  24   1   15.99    3.98
   0  23   1  172.70   13.45
   0  22   1  486.80   34.82
   0  21   1   42.88    5.16
   0  20   1   70.31    6.68
   0  19   1   55.91    6.08
   0  18   1  756.60   53.24
   0  17   1  167.50   13.05
   0  16   1  432.80   30.93
   0  15   1  121.40    9.90
   0  14   1 1999.00  138.90
   0  13   1 1207.00   84.19
   0 -12  -1  224.30   16.51
   0  12   1  221.60   16.43
   0 -11  -1   97.79    8.12
   0  11   1   89.27    7.80
   0 -10  -1 1798.00  124.90
   0  10   1 1884.00  130.90
   0  -9  -1   16.98    3.26
   0   9   1   12.90    3.43
   0  -7  -1  385.80   27.56
   0   7   1  403.30   28.66
   0  -6  -1   55.43    5.44
   0   6   1   62.80    5.86
   0  -5  -1  287.60   20.67
   0   5   1  270.80   19.44
   0  -4  -1 3126.00  216.30
   0   4   1 3229.00  223.40
   0  -3  -1 1897.00  131.30
   0   3   1 2048.00  141.70
   0  -2  -1  347.80   24.34
   0   2   1  377.40   26.38
   0   0  -1    0.41    1.21
   0   0   1    1.78    1.48
   0  11  -1  109.90    9.07
   0  12  -1  242.30   17.78
   0  13  -1 1222.00   85.24
   0  14  -1 2155.00  149.70
   0  15  -1  145.60   11.36
   0  16  -1  366.60   26.49
   0  17  -1  146.60   11.50
   0  18  -1  730.70   51.51
   0  19  -1   74.09    7.20
   0  20  -1   62.05    6.42
   0  21  -1   35.37    4.80
   0  22  -1  440.40   31.53
   0  23  -1  196.30   15.00
   0  24  -1   13.38    4.12
   0  25  -1  401.60   28.82
   0  26  -1  106.60    8.81
   0  27  -1  203.60   15.24
   0  28  -1   15.55    4.30
   0  29  -1   69.76    6.59
   0  30  -1  131.20   10.32
   0  31  -1    7.56    3.43
   0  32  -1   20.42    3.97
   0  32   2    9.19    3.50
   0  31   2  356.40   25.55
   0  30   2   90.66    7.96
   0  29   2  330.10   23.90
   0  28   2   39.40    4.77
   0  27   2  118.20    9.74
   0  26   2   91.70    8.04
   0  25   2  128.40   10.28
   0  24   2  222.80   16.93
   0  23   2  103.90    8.81
   0  22   2  343.50   25.01
   0  21   2    3.11    3.31
   0  20   2   23.92    4.62
   0  19   2  195.50   14.84
   0  18   2  167.70   12.76
   0 -17  -2   81.19    7.06
   0  17   2   72.02    6.71
   0 -16  -2  197.20   14.82
   0  16   2  192.70   14.61
   0 -15  -2  127.10   10.11
   0  15   2   96.76    8.26
   0 -14  -2   64.04    6.41
   0  14   2   63.09    5.76
   0 -13  -2   12.17    3.75
   0  13   2   17.39    3.97
   0 -12  -2  867.50   60.70
   0  12   2  849.60   59.50
   0 -11  -2    5.74    3.41
   0  11   2   16.59    3.71
   0 -10  -2  575.00   40.57
   0  10   2  585.40   41.32
   0  -9  -2  847.20   59.23
   0   9   2  873.10   61.11
   0  -8  -2    8.75    3.19
   0   8   2    3.84    3.33
   0  -7  -2    2.28    3.26
   0   7   2    5.41    3.26
   0  -6  -2  179.80   13.55
   0   6   2  212.90   15.76
   0  -5  -2   96.80    8.11
   0   5   2  124.70    9.81
   0  -4  -2  258.60   18.60
   0   4   2  253.50   18.34
   0  -3  -2    1.76    2.81
   0   3   2    5.82    3.31
   0  -2  -2 1499.00  103.90
   0   2   2 1349.00   93.57
   0  -1  -2 1204.00   83.55
   0   1   2 1234.00   85.72
   0   0  -2  483.60   33.85
   0   0   2  455.50   31.96
   0   1  -2  583.40   40.78
   0  -1   2 1310.00   90.89
   0   2  -2 1376.00   95.50
   0  -2   2 1320.00   91.62
   0   3  -2    5.52    3.72
   0  15  -2  117.30    9.64
   0  16  -2  215.20   16.14
   0  17  -2   60.89    6.33
   0  18  -2  177.90   13.73
   0  19  -2  198.30   15.15
   0  20  -2   14.32    4.12
   0  21  -2   10.89    4.28
   0  22  -2  382.00   27.53
   0  23  -2  109.50    9.34
   0  24  -2  249.50   18.43
   0  25  -2  137.40   11.06
   0  26  -2  100.50    8.60
   0  27  -2  118.80    9.53
   0  28  -2   19.35    4.26
   0  29  -2  279.20   20.31
   0  30  -2   78.94    6.97
   0  31  -2  297.50   21.53
   0  32  -2    8.67    3.73
   0  32   3   13.93    4.36
   0  31   3  174.70   13.30
   0  30   3   94.43    7.99
   0  29   3   28.45    4.58
   0  28   3  209.80   15.69
   0  27   3   71.12    6.76
   0  26   3   17.77    4.06
   0  25   3   14.13    4.01
   0  24   3  178.90   13.56
   0  23   3   31.69    4.90
   0  22   3   14.22    4.26
   0  21   3  200.90   15.24
   0 -20  -3  648.70   45.76
   0  20   3  681.20   48.12
   0 -19  -3   41.41    4.80
   0  19   3   40.82    4.94
   0 -18  -3  654.00   46.19
   0  18   3  786.70   55.26
   0 -17  -3 1093.00   76.43
   0  17   3 1129.00   78.90
   0 -16  -3  713.80   50.20
   0  16   3  749.70   52.76
   0 -15  -3 1384.00   96.34
   0  15   3 1348.00   93.99
   0 -14  -3   75.24    6.86
   0  14   3   97.87    8.40
   0 -13  -3 1540.00  107.20
   0  13   3 1592.00  110.80
   0 -12  -3  406.40   28.97
   0  12   3  353.20   25.45
   0 -11  -3 2114.00  146.70
   0  11   3 2241.00  155.50
   0 -10  -3  306.60   22.11
   0  10   3  285.20   20.70
   0  -9  -3 1132.00   78.87
   0   9   3 1235.00   86.06
   0  -8  -3  122.70    9.53
   0   8   3  108.60    9.01
   0  -7  -3  898.30   62.69
   0   7   3  981.60   68.59
   0  -6  -3   -2.14    2.90
   0   6   3    4.65    3.42
   0  -5  -3  248.00   17.99
   0   5   3  262.50   19.13
   0  -4  -3   22.80    3.74
   0   4   3   23.21    3.91
   0  -3  -3 4051.00  280.50
   0   3   3 3900.00  270.00
   0  -1  -3 2009.00  139.40
   0   1   3 2195.00  152.20
   0   0  -3    3.27    2.94
   0   0   3    5.48    4.64
   0   1  -3 2032.00  141.00
   0  -1   3 1926.00  133.70
   0   3  -3 3691.00  255.60
   0  -3   3 3792.00  262.60
   0   4  -3   29.28    4.84
   0   5  -3  248.90   18.41
   0   6  -3    3.86    3.92
   0  18  -3  800.10   56.33
   0  19  -3   35.79    5.05
   0  20  -3  724.10   51.08
   0  21  -3  190.40   14.69
   0  22  -3   32.16    5.09
   0  23  -3   39.53    4.86
   0  24  -3  157.90   12.33
   0  25  -3    3.90    3.61
   0  26  -3   17.05    4.22
   0  27  -3   67.53    6.32
   0  28  -3  189.90   14.35
   0  29  -3    7.78    2.75
   0  30  -3   99.21    8.43
   0  31  -3  138.10   10.70
   0  32  -3    0.24    3.60
   0  31   4    5.61    3.44
   0  30   4   20.54    4.38
   0  29   4   60.52    5.87
   0  28   4   -1.88    3.92
   0  27   4  111.70    9.26
   0  26   4   19.27    3.90
   0  25   4  101.70    8.82
   0  24   4  216.60   16.32
   0  23   4   67.50    6.57
   0 -22  -4   15.05    3.60
   0  22   4   17.72    3.96
   0 -21  -4   29.89    4.34
   0  21   4   32.29    4.73
   0 -20  -4   25.38    4.14
   0  20   4   13.24    4.18
   0 -19  -4    3.69    3.21
   0  19   4    6.99    4.06
   0 -18  -4   13.92    3.42
   0  18   4    6.72    3.58
   0 -17  -4  296.40   21.62
   0  17   4  303.80   22.08
   0 -16  -4  178.10   13.67
   0  16   4  175.70   13.35
   0 -15  -4  225.50   16.68
   0  15   4  219.10   16.36
   0 -14  -4 1344.00   93.63
   0  14   4 1455.00  101.40
   0 -13  -4   58.83    5.86
   0  13   4   57.46    5.84
   0 -12  -4 1078.00   75.34
   0  12   4 1013.00   70.85
   0 -11  -4  569.60   40.25
   0  11   4  496.70   35.23
   0 -10  -4  422.60   30.11
   0  10   4  406.20   29.05
   0  -9  -4    3.41    3.00
   0   9   4    0.18    3.36
   0  -8  -4  144.30   11.16
   0   8   4  135.10   10.62
   0  -7  -4    9.68    3.25
   0   7   4   12.76    3.85
   0  -6  -4  350.90   25.02
   0   6   4  318.10   23.06
   0  -5  -4   60.25    5.82
   0   5   4   69.60    6.49
   0  -4  -4 4523.00  313.00
   0   4   4 4375.00  302.90
   0  -3  -4 6359.00  439.80
   0   3   4 6470.00  447.60
   0  -2  -4 3299.00  228.50
   0   2   4 3368.00  233.30
   0  -1  -4  622.60   43.82
   0   1   4  593.70   41.78
   0   0  -4 1847.00  128.30
   0   0   4 1877.00  130.40
   0   1  -4  604.30   42.56
   0  -1   4  623.50   43.90
   0   2  -4 3407.00  236.00
   0  -2   4 3482.00  241.20
   0   3  -4 6307.00  436.30
   0  -3   4 6010.00  415.80
   0   4  -4 4288.00  296.80
   0  -4   4 4355.00  301.50
   0   5  -4   60.08    6.29
   0   6  -4  330.20   23.87
   0   7  -4    8.78    4.26
   0   8  -4  144.80   11.72
   0   9  -4    3.90    4.30
   0  21  -4   38.55    5.39
   0  22  -4   12.56    3.98
   0  23  -4   69.68    6.55
   0  24  -4  266.00   19.53
   0  25  -4   85.24    7.57
   0  26  -4   21.00    4.03
   0  27  -4  108.50    9.08
   0  28  -4   -2.56    3.13
   0  29  -4   62.86    6.15
   0  30  -4   12.97    3.46
   0  31  -4    5.90    3.81
   0  31   5    8.63    3.92
   0  30   5   12.05    3.46
   0  29   5   25.49    4.47
   0  28   5   18.11    4.31
   0  27   5   -2.43    3.41
   0  26   5   44.95    5.01
   0  25   5   -4.64    3.50
   0 -24  -5  149.00   11.42
   0  24   5  143.90   11.46
   0 -23  -5   14.56    3.55
   0  23   5    8.28    3.85
   0 -22  -5  122.90    9.74
   0  22   5  114.50    9.35
   0 -21  -5   28.08    4.09
   0  21   5   22.07    3.94
   0 -20  -5  163.50   12.61
   0  20   5  169.10   13.23
   0 -19  -5  354.50   25.62
   0  19   5  364.80   26.42
   0 -18  -5  620.40   43.88
   0  18   5  544.80   38.77
   0 -17  -5    7.38    3.33
   0  17   5    6.58    3.84
   0 -16  -5    2.19    3.71
   0  16   5   -1.72    3.35
   0 -15  -5 1814.00  126.20
   0  15   5 1754.00  122.00
   0 -14  -5   71.37    6.76
   0  14   5   75.07    6.99
   0 -13  -5  944.90   66.15
   0  13   5  956.70   67.01
   0 -12  -5  328.80   23.64
   0  12   5  315.30   22.83
   0 -11  -5  328.70   23.64
   0  11   5  338.80   24.41
   0 -10  -5    2.32    3.37
   0  10   5    3.16    3.01
   0  -9  -5 1731.00  120.40
   0   9   5 1858.00  129.20
   0  -8  -5  730.40   51.32
   0   8   5 1039.00   72.62
   0  -7  -5 1133.00   79.01
   0   7   5 1127.00   78.71
   0  -6  -5  382.50   27.36
   0   6   5  396.00   28.28
   0  -5  -5  283.40   20.58
   0   5   5  294.70   21.33
   0  -4  -5 1146.00   79.93
   0   4   5 1401.00   97.56
   0  -3  -5  390.10   27.88
   0   3   5  375.30   26.87
   0  -2  -5   33.80    4.46
   0   2   5   33.74    4.58
   0  -1  -5 3121.00  216.30
   0   1   5 2973.00  206.10
   0   0  -5    3.93    3.46
   0   0   5    1.90    3.94
   0   1  -5 2267.00  157.30
   0  -1   5 1849.00  128.50
   0   2  -5   30.81    4.57
   0  -2   5   43.30    5.02
   0   3  -5  399.70   28.62
   0  -3   5  401.30   28.73
   0   4  -5 1238.00   86.33
   0  -4   5 1254.00   87.41
   0   5  -5  294.60   21.50
   0  -5   5  333.60   24.13
   0   6  -5  398.10   28.69
   0   7  -5 1178.00   82.25
   0   8  -5 1120.00   78.29
   0   9  -5 1749.00  121.70
   0  10  -5    3.38    4.29
   0  11  -5  351.20   25.50
   0  12  -5  312.60   22.84
   0  13  -5  855.60   60.16
   0  14  -5   58.93    6.53
   0  23  -5    6.01    3.96
   0  24  -5  153.00   11.70
   0  25  -5    3.14    3.37
   0  26  -5   48.54    5.59
   0  27  -5    0.07    3.32
   0  28  -5   15.95    3.72
   0  29  -5   25.65    4.47
   0  30  -5   11.94    3.47
   0  31  -5    6.83    3.56
   0  30   6   70.95    6.64
   0  29   6  103.30    8.64
   0  28   6   15.12    3.89
   0  27   6   23.24    4.05
   0 -26  -6    1.23    3.30
   0  26   6    4.08    3.23
   0 -25  -6   -3.17    3.26
   0  25   6    5.22    3.16
   0 -24  -6  378.70   27.17
   0  24   6  402.40   28.83
   0 -23  -6   27.97    4.29
   0  23   6    3.03    3.61
   0 -22  -6   77.89    7.11
   0  22   6   93.56    8.36
   0 -21  -6   29.76    4.51
   0  21   6   27.06    4.44
   0 -20  -6   90.28    7.81
   0  20   6  145.20   11.46
   0 -19  -6  412.30   29.54
   0  19   6  351.90   25.46
   0 -18  -6  430.60   30.81
   0  18   6  453.20   32.50
   0 -17  -6  858.60   60.26
   0  17   6  823.90   57.97
   0 -16  -6  627.70   44.37
   0  16   6  625.20   44.27
   0 -15  -6  388.00   27.90
   0  15   6  423.50   30.41
   0 -14  -6 1361.00   94.95
   0  14   6 1498.00  104.40
   0 -13  -6    4.54    3.69
   0  13   6    7.57    3.62
   0 -12  -6  209.00   15.65
   0  12   6  215.50   16.10
   0 -11  -6  153.30   11.81
   0  11   6  148.60   11.65
   0 -10  -6  609.10   43.00
   0  10   6  601.70   42.58
   0  -9  -6  490.40   34.75
   0   9   6  521.20   37.09
   0  -8  -6  239.20   17.60
   0   8   6  243.80   18.01
   0  -7  -6    2.26    3.00
   0   7   6    2.90    3.09
   0  -6  -6   21.17    3.56
   0   6   6   18.84    4.04
   0  -5  -6  188.60   14.26
   0   5   6  192.00   14.54
   0  -4  -6 2020.00  140.30
   0   4   6 2026.00  140.80
   0  -3  -6 2313.00  160.50
   0   3   6 2388.00  165.80
   0  -2  -6  127.40   10.18
   0   2   6  137.30   10.91
   0  -1  -6   52.42    5.59
   0   1   6   64.78    6.49
   0   0  -6  118.90    9.68
   0   0   6  118.10    9.87
   0   1  -6   68.63    6.59
   0  -1   6   59.69    6.34
   0   2  -6  129.90   10.37
   0  -2   6  151.00   12.01
   0   3  -6 2397.00  166.40
   0  -3   6 2475.00  171.80
   0   4  -6 1921.00  133.50
   0  -4   6 2323.00  161.30
   0   5  -6  179.00   13.79
   0  -5   6  199.40   15.25
   0   6  -6   10.95    4.15
   0   7  -6   -0.47    3.92
   0   8  -6  253.70   18.96
   0   9  -6  506.30   36.11
   0  10  -6  508.80   36.24
   0  11  -6  148.40   11.75
   0  12  -6  221.00   16.73
   0  13  -6    3.58    4.26
   0  14  -6 1068.00   74.79
   0  15  -6  409.40   29.61
   0  16  -6  674.40   47.78
   0  17  -6  897.10   63.01
   0  18  -6  433.40   31.26
   0  19  -6  363.00   26.43
   0  20  -6  147.30   12.11
   0  21  -6   24.28    5.40
   0  22  -6   60.02    7.02
   0  23  -6   28.24    5.72
   0  24  -6  378.20   27.02
   0  24  -6  369.40   26.79
   0  25  -6    5.35    3.44
   0  25  -6    3.32    4.90
   0  26  -6   -0.54    3.49
   0  26  -6    0.80    4.84
   0  27  -6   24.74    4.27
   0  27  -6   16.48    5.26
   0  28  -6   37.25    5.82
   0  28  -6   20.77    3.55
   0  29  -6   95.41    7.86
   0  29  -6   92.02    8.74
   0  30  -6   65.38    6.39
   0  30  -6   61.68    7.13
   0  29   7   19.23    4.03
   0  28   7   88.64    7.68
   0 -27  -7    3.47    3.24
   0  27   7    5.38    3.67
   0 -26  -7   90.07    7.65
   0  26   7   89.80    7.81
   0 -25  -7    2.04    3.13
   0  25   7    6.12    3.78
   0 -24  -7   20.18    3.68
   0  24   7    9.76    3.62
   0 -23  -7  171.00   13.00
   0  23   7  212.70   15.96
   0 -22  -7    8.79    3.44
   0  22   7    2.05    3.79
   0 -21  -7   28.91    4.34
   0  21   7   29.33    4.61
   0 -20  -7  392.90   28.23
   0  20   7  421.10   30.18
   0 -19  -7    5.74    3.03
   0  19   7    1.69    3.67
   0 -18  -7  309.00   22.61
   0  18   7  297.90   21.81
   0 -17  -7   60.56    5.99
   0  17   7   37.49    4.96
   0 -16  -7 2400.00  166.70
   0  16   7 2560.00  177.80
   0 -15  -7   12.36    3.29
   0  15   7    2.89    3.87
   0 -14  -7  151.50   11.79
   0  14   7  165.30   12.91
   0 -13  -7   25.26    4.11
   0  13   7   11.22    4.00
   0 -12  -7   -1.08    3.05
   0  12   7   -0.66    3.36
   0 -11  -7   40.02    4.60
   0  11   7   35.54    4.88
   0 -10  -7   70.44    6.68
   0  10   7   58.48    6.02
   0  -9  -7   24.01    4.19
   0   9   7   13.70    4.06
   0  -8  -7   98.07    8.30
   0   8   7   96.72    8.38
   0  -7  -7   70.90    6.46
   0   7   7   72.86    7.03
   0  -6  -7   21.77    4.01
   0   6   7   25.39    4.54
   0  -5  -7 1011.00   70.67
   0   5   7  983.80   68.96
   0  -4  -7 1080.00   75.48
   0   4   7 1131.00   79.02
   0  -3  -7  695.00   48.91
   0   3   7 1447.00  100.90
   0  -2  -7   45.00    5.17
   0   2   7   45.72    5.38
   0  -1  -7  266.20   19.51
   0   1   7  274.90   20.27
   0   0  -7    3.37    3.38
   0   0   7  -10.43    4.00
   0   1  -7  273.10   19.97
   0  -1   7  267.80   19.75
   0   2  -7   36.58    4.72
   0  -2   7   46.24    5.34
   0   3  -7 1348.00   94.06
   0  -3   7 1305.00   91.03
   0   4  -7 1158.00   80.96
   0  -4   7 1102.00   77.04
   0   5  -7 1008.00   70.57
   0  -5   7  974.80   68.28
   0   6  -7   15.28    4.23
   0   7  -7   70.58    7.04
   0   8  -7  105.40    9.00
   0   9  -7   14.18    4.40
   0  10  -7   64.61    6.82
   0  11  -7   37.09    5.48
   0  12  -7    1.22    4.35
   0  13  -7   21.57    5.38
   0  14  -7  145.60   11.79
   0  15  -7   16.70    5.19
   0  16  -7 2364.00  164.30
   0  17  -7   58.61    6.97
   0  18  -7  294.60   21.70
   0  19  -7   -3.90    4.92
   0  20  -7  386.00   27.94
   0  21  -7   15.21    5.16
   0  22  -7    5.21    4.72
   0  23  -7  186.40   14.54
   0  24  -7   26.15    5.46
   0  25  -7    8.94    5.09
   0  26  -7   89.20    8.43
   0  26  -7   82.30    6.92
   0  27  -7    5.66    3.15
   0  27  -7    4.27    4.99
   0  28  -7  110.50    9.77
   0  28  -7   95.60    8.03
   0  29  -7   23.38    4.05
   0  29  -7   21.61    5.53
   0 -28  -8    1.81    3.18
   0  28   8    0.68    3.61
   0 -27  -8    5.12    3.29
   0  27   8    4.74    3.81
   0 -26  -8   26.90    4.02
   0  26   8   26.03    4.48
   0 -25  -8    4.94    3.29
   0  25   8    2.86    3.65
   0 -24  -8   10.91    3.53
   0  24   8    3.71    3.77
   0 -23  -8    1.68    3.13
   0  23   8    9.31    3.96
   0 -22  -8  347.00   24.85
   0  22   8  372.20   26.76
   0 -21  -8  269.50   19.63
   0  21   8  253.70   18.76
   0 -20  -8   82.42    7.32
   0  20   8   75.61    7.14
   0 -19  -8  215.80   16.20
   0  19   8  209.60   15.87
   0 -18  -8   -0.67    2.97
   0  18   8    7.72    3.90
   0 -17  -8  525.30   37.35
   0  17   8  530.00   37.64
   0 -16  -8   27.55    3.98
   0  16   8   26.20    4.69
   0 -15  -8  937.90   65.74
   0  15   8  967.20   67.84
   0 -14  -8  101.90    8.64
   0  14   8   78.18    7.49
   0 -13  -8    0.97    3.01
   0  13   8   -1.39    3.63
   0 -12  -8   79.82    6.94
   0  12   8   71.04    7.05
   0 -11  -8  183.20   13.83
   0  11   8  199.50   15.22
   0 -10  -8  518.50   36.85
   0  10   8  506.40   36.09
   0  -9  -8    4.20    3.59
   0   9   8    3.38    3.76
   0  -8  -8  238.70   17.75
   0   8   8  251.30   18.62
   0  -7  -8  362.60   26.11
   0   7   8  381.10   27.51
   0  -6  -8 1585.00  110.40
   0   6   8 1754.00  122.10
   0  -5  -8  663.00   46.80
   0   5   8  634.50   44.90
   0  -4  -8 1346.00   93.90
   0   4   8 1320.00   92.16
   0  -3  -8  596.70   42.25
   0   3   8  639.50   45.42
   0  -2  -8 2372.00  164.70
   0   2   8 1681.00  117.00
   0  -1  -8   16.24    3.86
   0   1   8    8.40    3.82
   0   0  -8 1574.00  109.70
   0   0   8 1616.00  112.50
   0   1  -8   17.92    4.13
   0  -1   8    9.56    4.11
   0   2  -8 2423.00  168.20
   0  -2   8 2619.00  181.70
   0   3  -8  552.60   39.21
   0  -3   8  527.10   37.43
   0   4  -8 1341.00   93.56
   0  -4   8  831.20   58.40
   0   5  -8  663.20   46.85
   0  -5   8  585.20   41.47
   0   6  -8 1773.00  123.50
   0  -6   8 1602.00  111.60
   0   7  -8  353.10   25.56
   0   8  -8  239.40   18.08
   0   9  -8    2.98    4.33
   0  10  -8  433.80   31.30
   0  11  -8  184.30   14.44
   0  12  -8   87.51    8.53
   0  13  -8    3.34    5.03
   0  14  -8   98.78    9.18
   0  15  -8  959.90   67.42
   0  16  -8   32.62    6.09
   0  17  -8  527.10   37.62
   0  18  -8   -0.20    4.40
   0  19  -8  239.10   18.07
   0  20  -8   85.49    8.45
   0  21  -8  277.10   20.38
   0  22  -8  381.00   27.60
   0  23  -8    7.11    4.88
   0  24  -8   10.46    4.45
   0  25  -8    8.42    5.04
   0  26  -8   18.61    5.37
   0  27  -8    4.35    3.48
   0  27  -8    7.66    5.21
   0  28  -8    1.45    3.27
   0  28  -8   -2.11    5.18
   0 -26  -9   -2.04    3.19
   0  26   9    5.80    3.68
   0 -25  -9  120.00    9.56
   0  25   9  128.70   10.30
   0 -24  -9   -0.54    3.05
   0  24   9    1.20    3.60
   0 -23  -9   84.73    7.24
   0  23   9   85.63    7.61
   0 -22  -9   86.03    7.12
   0  22   9   80.60    7.41
   0 -21  -9  543.20   38.30
   0  21   9  590.30   41.74
   0 -20  -9  148.20   11.46
   0  20   9  145.50   11.41
   0 -19  -9  316.30   22.86
   0  19   9  285.10   20.87
   0 -18  -9    6.66    3.00
   0  18   9    2.65    3.75
   0 -17  -9  161.90   12.49
   0  17   9  167.70   13.09
   0 -16  -9  133.70   10.60
   0  16   9  123.50   10.06
   0 -15  -9   23.04    4.14
   0  15   9   17.38    3.82
   0 -14  -9    7.00    3.01
   0  14   9    8.23    3.91
   0 -13  -9  183.80   13.93
   0  13   9  160.70   12.57
   0 -12  -9  128.90   10.38
   0  12   9  130.70   10.67
   0 -11  -9   75.93    6.97
   0  11   9   85.59    7.96
   0 -10  -9  129.40   10.39
   0  10   9  115.10    9.43
   0  -9  -9   34.27    4.53
   0   9   9   31.33    4.39
   0  -8  -9  141.20   11.14
   0   8   9  159.40   12.46
   0  -7  -9 2033.00  141.30
   0   7   9 2058.00  143.10
   0  -6  -9  157.10   12.29
   0   6   9  162.60   12.57
   0  -5  -9  567.90   40.25
   0   5   9  620.00   43.91
   0  -4  -9   71.59    6.82
   0   4   9   75.63    7.28
   0  -3  -9  870.40   61.11
   0   3   9  728.40   51.42
   0  -2  -9  344.20   24.93
   0   2   9  298.50   22.03
   0  -1  -9 2319.00  161.10
   0   1   9 2281.00  158.50
   0   0  -9   -8.89    3.69
   0   0   9   12.71    4.54
   0   1  -9 2261.00  157.10
   0  -1   9 2314.00  160.80
   0   2  -9  352.60   25.57
   0  -2   9  345.30   25.11
   0   3  -9  845.90   59.46
   0  -3   9  826.70   58.15
   0   4  -9   54.32    5.83
   0  -4   9   54.14    6.19
   0   5  -9  581.90   41.25
   0  -5   9  627.50   44.35
   0   6  -9  168.00   13.02
   0  -6   9  185.70   14.12
   0   7  -9 2056.00  142.90
   0   8  -9  123.20    9.92
   0   9  -9   33.79    4.97
   0  10  -9  155.70   12.51
   0  11  -9   51.12    6.31
   0  12  -9  166.60   13.36
   0  13  -9  204.20   15.65
   0  14  -9    6.01    4.80
   0  15  -9   18.02    5.07
   0  16  -9  113.30    9.93
   0  17  -9  175.50   13.91
   0  18  -9   -1.64    4.83
   0  19  -9  358.00   25.97
   0  20  -9  166.60   13.25
   0  21  -9  602.30   42.66
   0  22  -9   81.11    7.67
   0  23  -9  103.50    9.63
   0  24  -9    1.47    4.94
   0  25  -9  129.10   10.63
   0  26  -9    0.22    4.81
   0 -25 -10    4.18    3.29
   0  25  10    9.30    3.40
   0 -24 -10   21.72    3.88
   0  24  10   16.42    4.10
   0 -23 -10    0.06    3.43
   0  23  10    0.60    3.51
   0 -22 -10   -0.30    3.26
   0  22  10    6.33    3.75
   0 -21 -10  337.70   24.19
   0  21  10  362.60   26.03
   0 -20 -10  142.80   11.05
   0  20  10  144.60   11.45
   0 -19 -10  150.30   11.51
   0  19  10  133.80   10.81
   0 -18 -10  110.60    9.03
   0  18  10  114.50    9.62
   0 -17 -10  323.10   23.29
   0  17  10  305.70   22.32
   0 -16 -10   18.60    3.78
   0  16  10   12.07    4.12
   0 -15 -10  402.30   28.75
   0  15  10  418.60   29.98
   0 -14 -10  274.20   20.08
   0  14  10  287.70   21.04
   0 -13 -10    1.00    3.06
   0  13  10   -2.31    3.54
   0 -12 -10  242.60   17.94
   0  12  10  241.10   17.90
   0 -11 -10    4.12    3.17
   0  11  10   -0.50    3.70
   0 -10 -10   58.13    5.43
   0  10  10   59.97    6.33
   0  -9 -10    4.95    3.31
   0   9  10   -2.96    3.61
   0  -8 -10   49.58    5.42
   0   8  10   44.49    5.39
   0  -7 -10   35.04    4.72
   0   7  10   35.09    4.93
   0  -6 -10    7.96    3.52
   0   6  10   19.30    4.24
   0  -5 -10  260.60   19.20
   0   5  10  275.50   20.25
   0  -4 -10    8.53    3.65
   0   4  10   12.77    4.02
   0  -3 -10   70.57    6.69
   0   3  10   54.18    6.08
   0  -2 -10    8.29    3.69
   0   2  10    6.89    3.79
   0  -1 -10  119.90    9.93
   0   1  10  112.90    9.61
   0   0 -10   12.07    3.76
   0   0  10   17.16    4.32
   0   1 -10  105.30    8.89
   0  -1  10  119.50    9.95
   0   2 -10    7.71    3.73
   0  -2  10    4.01    3.84
   0   3 -10   67.28    6.45
   0  -3  10   54.11    5.95
   0   4 -10    1.46    3.53
   0  -4  10    1.72    3.83
   0   5 -10  280.80   20.55
   0  -5  10  259.20   19.18
   0   6 -10   11.04    3.55
   0   7 -10   19.85    3.98
   0   8 -10   43.78    5.15
   0   9 -10    2.98    3.34
   0  10 -10   64.79    6.34
   0  11 -10    2.31    3.46
   0  12 -10  257.20   19.10
   0  13 -10   -3.94    4.52
   0  14 -10  169.40   13.43
   0  15 -10  360.50   26.19
   0  16 -10   16.58    5.02
   0  17 -10  329.10   23.99
   0  18 -10  121.20   10.20
   0  19 -10  168.80   13.21
   0  20 -10  142.40   11.59
   0  21 -10  382.40   27.60
   0  22 -10    3.52    4.90
   0  23 -10   -5.50    4.94
   0  24 -10   18.55    5.28
   0  25 -10    3.51    5.58
   0 -23 -11   75.61    6.78
   0  23  11   78.91    6.98
   0 -22 -11   29.26    3.86
   0  22  11   23.93    4.49
   0 -21 -11   33.92    4.17
   0  21  11   30.54    4.66
   0 -20 -11   72.63    6.47
   0  20  11   69.97    6.59
   0 -19 -11  345.50   24.83
   0  19  11  290.30   21.11
   0 -18 -11  305.90   22.12
   0  18  11  338.40   24.42
   0 -17 -11  218.30   16.04
   0  17  11  233.70   17.35
   0 -16 -11  507.60   35.89
   0  16  11  541.00   38.32
   0 -15 -11  265.60   19.38
   0  15  11  259.90   19.07
   0 -14 -11  174.90   13.18
   0  14  11  168.00   13.03
   0 -13 -11    6.33    3.52
   0  13  11    5.90    3.76
   0 -12 -11   23.83    3.72
   0  12  11   24.93    4.28
   0 -11 -11  441.20   31.52
   0  11  11  466.60   33.20
   0 -10 -11  113.40    9.21
   0  10  11   98.58    8.56
   0  -9 -11  459.70   32.71
   0   9  11  510.70   36.31
   0  -8 -11  770.90   54.14
   0   8  11  760.80   53.58
   0  -7 -11    4.82    2.80
   0   7  11   -3.65    3.34
   0  -6 -11  399.50   28.67
   0   6  11  429.00   30.73
   0  -5 -11  240.20   17.80
   0   5  11  264.80   19.42
   0  -4 -11   53.51    5.69
   0   4  11   52.17    5.64
   0  -3 -11   13.09    3.79
   0   3  11   17.29    4.07
   0  -2 -11  110.10    9.04
   0   2  11  119.60    9.81
   0  -1 -11  122.50    9.98
   0   1  11  114.00    9.44
   0   0 -11   -2.69    3.23
   0   0  11   -2.95    3.62
   0   1 -11  115.10    9.49
   0  -1  11  142.80   11.37
   0   2 -11  109.00    8.82
   0  -2  11  116.40    9.67
   0   3 -11    9.03    3.52
   0  -3  11    4.81    3.90
   0   4 -11   42.68    5.15
   0  -4  11   50.85    6.15
   0   5 -11  279.70   20.53
   0  -5  11  215.80   16.34
   0   6 -11  400.90   28.79
   0   7 -11    2.58    3.40
   0   8 -11  841.60   59.09
   0   9 -11  459.00   32.76
   0  10 -11   78.21    6.99
   0  11 -11  478.50   34.10
   0  12 -11   20.70    4.10
   0  13 -11   10.17    3.79
   0  14 -11  161.10   12.43
   0  15 -11  303.10   22.22
   0  16 -11  526.50   37.40
   0  17 -11  244.60   18.17
   0  18 -11  236.80   17.87
   0  19 -11  377.70   27.26
   0  20 -11   75.27    7.54
   0  21 -11   31.30    5.24
   0  22 -11   24.30    5.19
   0  23 -11   58.92    6.61
   0 -21 -12    3.00    3.07
   0  21  12    3.63    3.44
   0 -20 -12   48.45    4.93
   0  20  12   76.38    7.00
   0 -19 -12  347.60   24.81
   0  19  12  354.00   25.33
   0 -18 -12   71.18    6.41
   0  18  12   70.73    6.52
   0 -17 -12  408.20   29.06
   0  17  12  448.00   31.80
   0 -16 -12  152.60   11.60
   0  16  12  152.20   11.73
   0 -15 -12   50.37    5.20
   0  15  12   42.30    5.22
   0 -14 -12  423.40   30.16
   0  14  12  533.10   37.83
   0 -13 -12  157.80   12.08
   0  13  12  161.80   12.48
   0 -12 -12  307.40   22.14
   0  12  12  318.50   23.08
   0 -11 -12   15.03    3.62
   0  11  12   10.48    3.90
   0 -10 -12  464.00   32.91
   0  10  12  477.20   33.96
   0  -9 -12  120.10    9.72
   0   9  12  142.70   11.31
   0  -8 -12   98.62    8.24
   0   8  12   93.36    8.15
   0  -7 -12  194.00   14.65
   0   7  12  231.40   17.18
   0  -6 -12   15.69    3.59
   0   6  12    5.69    3.70
   0  -5 -12   87.85    7.63
   0   5  12   84.87    7.55
   0  -4 -12   -0.30    3.47
   0   4  12    2.34    3.61
   0  -3 -12   82.08    7.14
   0   3  12   69.75    6.83
   0  -2 -12   47.68    5.28
   0   2  12   55.59    5.80
   0  -1 -12  180.00   13.65
   0   1  12  178.50   13.60
   0   0 -12    5.62    3.16
   0   0  12   -2.42    3.38
   0   1 -12  174.60   13.31
   0  -1  12  210.60   15.74
   0   2 -12   59.60    5.97
   0  -2  12   52.13    5.63
   0   3 -12   72.40    6.70
   0  -3  12   72.12    7.00
   0   4 -12    3.26    3.28
   0  -4  12    1.78    3.71
   0   5 -12   88.51    7.72
   0  -5  12   99.78    8.65
   0   6 -12   12.70    3.57
   0   7 -12  193.50   14.67
   0   8 -12   61.19    6.17
   0   9 -12  144.90   11.27
   0  10 -12  364.10   26.28
   0  11 -12   34.80    4.58
   0  12 -12  333.80   24.12
   0  13 -12  171.40   13.11
   0  14 -12  523.60   37.01
   0  15 -12   55.15    5.42
   0  16 -12  138.10   10.65
   0  17 -12  437.30   31.05
   0  18 -12   73.59    6.76
   0  19 -12  453.70   32.47
   0  20 -12   27.05    5.16
   0  21 -12    9.88    5.01
   0 -18 -13   39.39    4.35
   0  18  13   42.98    4.99
   0 -17 -13   43.09    4.65
   0  17  13   40.83    4.90
   0 -16 -13    4.54    2.84
   0  16  13    1.47    3.57
   0 -15 -13  108.20    8.82
   0  15  13  110.10    9.11
   0 -14 -13    0.67    3.26
   0  14  13    3.77    3.70
   0 -13 -13  365.20   26.08
   0  13  13  337.20   24.29
   0 -12 -13   34.26    3.99
   0  12  13   25.02    3.95
   0 -11 -13    7.70    3.30
   0  11  13    0.78    3.82
   0 -10 -13   15.74    3.80
   0  10  13   14.46    4.21
   0  -9 -13    5.14    2.92
   0   9  13   -1.22    3.49
   0  -8 -13   19.84    3.60
   0   8  13   18.45    4.08
   0  -7 -13   41.04    4.94
   0   7  13   56.76    6.07
   0  -6 -13   70.25    6.47
   0   6  13   64.94    6.43
   0  -5 -13  118.60    9.32
   0   5  13  106.90    8.87
   0  -4 -13   16.85    3.67
   0   4  13   15.58    4.06
   0  -3 -13  282.50   20.56
   0   3  13  275.60   20.06
   0  -2 -13   18.15    3.89
   0   2  13   13.54    3.96
   0  -1 -13  236.90   17.40
   0   1  13  243.20   18.02
   0   0 -13    2.00    3.24
   0   0  13    3.53    4.01
   0   1 -13  241.70   17.74
   0  -1  13  237.80   17.73
   0   2 -13   28.50    4.09
   0  -2  13   22.65    4.52
   0   3 -13  261.60   19.16
   0  -3  13  241.00   17.92
   0   4 -13   13.36    3.10
   0  -4  13   13.21    4.04
   0   5 -13  120.20    9.60
   0   6 -13   70.24    6.61
   0   7 -13   52.94    5.69
   0   8 -13   16.98    3.70
   0   9 -13    9.58    3.82
   0  10 -13   20.31    3.55
   0  11 -13   13.06    3.79
   0  12 -13   40.33    4.85
   0  13 -13  381.70   27.19
   0  14 -13    5.85    3.39
   0  15 -13  107.90    8.75
   0  16 -13    0.26    3.48
   0  17 -13   36.02    4.53
   0  18 -13   33.28    4.26
   0 -14 -14  172.90   12.90
   0  14  14  187.70   14.11
   0 -13 -14  134.20   10.36
   0  13  14  135.20   10.57
   0 -12 -14  168.50   12.74
   0  12  14  168.80   12.90
   0 -11 -14  199.70   14.73
   0  11  14  195.30   14.63
   0 -10 -14  149.20   11.28
   0  10  14  195.30   14.66
   0  -9 -14   16.44    3.44
   0   9  14   11.61    4.03
   0  -8 -14  193.30   14.38
   0   8  14  177.60   13.49
   0  -7 -14   70.21    6.41
   0   7  14   66.76    6.57
   0  -6 -14   49.54    5.26
   0   6  14   44.84    5.35
   0  -5 -14    5.13    3.49
   0   5  14   -0.42    3.95
   0  -4 -14   -1.03    3.30
   0   4  14   -2.97    3.85
   0  -3 -14   -1.86    3.24
   0   3  14   -1.51    3.55
   0  -2 -14   72.32    6.53
   0   2  14   64.56    6.26
   0  -1 -14   22.69    3.81
   0   1  14   28.94    4.69
   0   0 -14    8.36    3.23
   0   0  14    9.76    3.97
   0   1 -14   27.86    4.13
   0  -1  14   24.50    4.53
   0   2 -14   78.21    6.96
   0  -2  14   80.64    7.54
   0   3 -14    0.88    3.37
   0  -3  14   -0.55    3.95
   0   4 -14   -2.02    3.25
   0   5 -14    4.59    3.18
   0   6 -14   53.87    5.57
   0   7 -14   61.94    6.05
   0   8 -14  178.70   13.41
   0   9 -14   10.40    3.66
   0  10 -14  183.20   13.80
   0  11 -14  170.20   12.82
   0  12 -14  155.80   11.85
   0  13 -14  138.90   10.81
   0  14 -14  178.80   13.36
   0  -9 -15   61.88    5.37
   0   9  15   59.46    6.18
   0  -8 -15    6.84    2.96
   0   8  15    6.75    3.65
   0  -7 -15   11.01    3.00
   0   7  15   15.56    4.22
   0  -6 -15  126.20    9.72
   0   6  15  127.30   10.24
   0  -5 -15   36.11    4.11
   0   5  15   33.96    4.71
   0  -4 -15   31.57    3.80
   0   4  15   17.56    3.93
   0  -3 -15  125.00    9.63
   0   3  15  121.80    9.87
   0  -2 -15   14.47    3.38
   0   2  15   12.85    4.09
   0  -1 -15   17.36    3.72
   0   1  15   21.69    4.63
   0   0 -15    4.08    3.29
   0   0  15   -4.02    3.93
   0   1 -15   16.18    3.56
   0  -1  15   11.54    4.05
   0   2 -15   10.35    3.43
   0  -2  15    4.17    3.82
   0   3 -15  108.40    8.80
   0  -3  15  132.00   10.30
   0   4 -15   14.40    3.51
   0   5 -15   35.24    4.31
   0   6 -15  117.50    9.34
   0   7 -15    9.39    3.54
   0   8 -15    6.62    3.10
   0   9 -15   55.87    5.52
   1  11 -15   40.14    4.69
   1  10 -15    3.84    3.16
   1   9 -15  182.30   13.64
   1   8 -15   27.62    4.06
   1   7 -15   32.20    4.27
   1   6 -15   88.13    7.49
   1   5 -15  121.20    9.60
  -1  -4  15    1.81    3.28
   1   4 -15   -4.68    3.17
  -1  -3  15  180.90   13.73
   1   3 -15  180.00   13.40
  -1  -2  15   17.18    4.14
   1   2 -15   11.15    3.56
  -1  -1  15  197.90   14.85
   1   1 -15  221.20   16.36
  -1   0  15    0.25    3.59
   1   0 -15    1.07    3.38
  -1   1  15  207.70   15.39
   1  -1 -15  201.60   14.97
  -1   2  15   11.22    3.66
   1  -2 -15   11.30    3.33
  -1   3  15  198.00   14.85
   1  -3 -15  202.50   15.00
  -1   4  15   -0.26    3.59
   1  -4 -15    6.05    2.87
  -1   5  15  115.60    9.46
   1  -5 -15  111.50    8.79
  -1   6  15   91.66    7.84
   1  -6 -15   84.97    7.13
  -1   7  15   34.18    4.48
   1  -7 -15   37.79    4.36
  -1   8  15   19.79    4.16
   1  -8 -15   18.91    3.48
  -1   9  15  178.00   13.55
   1  -9 -15  193.50   14.21
  -1  10  15    1.30    3.46
   1 -10 -15    1.66    2.78
  -1  11  15   45.77    5.33
   1 -11 -15   58.75    5.65
   1  15 -14   21.17    3.78
   1  14 -14   33.63    4.38
   1  13 -14   62.03    5.90
   1  12 -14    8.73    3.52
   1  11 -14   24.46    3.89
   1  10 -14    1.66    3.35
   1   9 -14   67.48    6.41
   1   8 -14   13.96    3.71
   1   7 -14  239.00   17.58
   1   6 -14    5.94    3.37
   1   5 -14  235.40   17.27
  -1  -4  14    2.38    3.69
   1   4 -14    4.44    3.48
  -1  -3  14   80.58    7.38
   1   3 -14   94.34    8.02
  -1  -2  14   30.78    4.72
   1   2 -14   28.03    4.34
  -1  -1  14   27.14    4.54
   1   1 -14   23.63    4.16
  -1   0  14  176.00   13.61
   1   0 -14  191.90   14.45
  -1   1  14   25.68    4.54
   1  -1 -14   24.53    4.19
  -1   2  14   27.20    4.55
   1  -2 -14   24.42    4.20
  -1   3  14   80.69    7.32
   1  -3 -14   80.16    7.27
  -1   4  14    3.55    3.72
   1  -4 -14    9.76    3.70
  -1   5  14  212.10   15.73
   1  -5 -14  236.80   17.43
  -1   6  14    1.30    3.62
   1  -6 -14    4.56    3.35
  -1   7  14  228.60   17.02
   1  -7 -14  239.70   17.62
  -1   8  14   15.52    4.25
   1  -8 -14   18.07    3.49
  -1   9  14   65.45    6.17
   1  -9 -14   62.83    5.83
  -1  10  14    2.56    3.70
   1 -10 -14    3.26    2.84
  -1  11  14   15.63    4.05
   1 -11 -14   17.68    3.58
  -1  12  14    4.02    3.19
   1 -12 -14    8.47    3.34
  -1  13  14   62.57    6.28
   1 -13 -14   68.97    6.40
  -1  14  14   36.90    5.01
   1 -14 -14   39.64    4.59
  -1  15  14   21.97    4.18
   1 -15 -14   18.15    3.26
  -1  16  14    8.47    4.18
   1 -16 -14   11.50    3.37
   1  19 -13   62.83    5.97
   1  18 -13  109.90    8.82
   1  17 -13  158.90   12.18
   1  16 -13    5.12    3.50
   1  15 -13   55.25    5.67
   1  14 -13    4.88    3.43
   1  13 -13  139.60   10.70
   1  12 -13    6.36    3.43
   1  11 -13   23.84    4.25
   1  10 -13   24.48    3.72
   1   9 -13   50.44    5.53
   1   8 -13  839.70   58.89
   1   7 -13  297.30   21.68
   1   6 -13  425.60   30.44
  -1  -5  13   65.35    6.50
   1   5 -13   57.44    5.95
  -1  -4  13  470.10   33.52
   1   4 -13  478.70   34.03
  -1  -3  13   99.25    8.64
   1   3 -13   83.08    7.32
  -1  -2  13  245.10   18.17
   1   2 -13  240.60   17.75
  -1  -1  13    2.86    3.73
   1   1 -13   11.55    3.68
  -1   0  13   -1.16    3.59
   1   0 -13   -4.28    3.20
  -1   1  13   -4.31    3.50
   1  -1 -13    5.29    3.48
  -1   2  13  216.70   16.11
   1  -2 -13  177.40   13.62
  -1   3  13   75.74    6.92
   1  -3 -13   74.63    6.92
  -1   4  13  487.10   34.57
   1  -4 -13  474.90   33.74
  -1   5  13   79.89    7.32
   1  -5 -13   69.44    6.45
  -1   6  13  338.60   24.54
   1  -6 -13  465.30   33.12
  -1   7  13  296.10   21.67
   1  -7 -13  271.60   19.86
  -1   8  13  882.70   61.86
   1  -8 -13  900.20   63.01
  -1   9  13   46.73    5.42
   1  -9 -13   48.22    5.14
  -1  10  13   22.24    4.00
   1 -10 -13   28.25    4.20
  -1  11  13   20.26    4.28
   1 -11 -13   25.63    3.83
  -1  12  13    9.78    3.97
   1 -12 -13   13.17    3.20
  -1  13  13  143.20   11.13
   1 -13 -13  133.90   10.44
  -1  14  13   10.44    3.70
   1 -14 -13    7.90    3.48
  -1  15  13   68.94    6.62
   1 -15 -13   62.63    5.99
  -1  16  13    8.56    3.81
   1 -16 -13    4.71    2.88
  -1  17  13  105.50    8.82
   1 -17 -13  146.90   11.11
  -1  18  13   98.87    8.28
   1 -18 -13  101.90    8.09
  -1  19  13   80.68    7.15
   1 -19 -13   67.13    6.14
   1  21 -12  170.40   13.26
   1  20 -12  101.50    8.92
   1  19 -12  101.50    8.88
   1  18 -12  124.10    9.90
   1  17 -12   70.51    6.40
   1  16 -12   85.64    7.49
   1  15 -12  211.90   15.71
   1  14 -12  295.20   21.41
   1  13 -12    8.70    3.55
   1  12 -12  323.50   23.42
   1  11 -12   53.62    5.42
   1  10 -12  157.80   12.34
   1   9 -12  247.00   18.19
   1   8 -12  496.10   35.25
   1   7 -12  181.80   13.97
  -1  -6  12  517.60   36.72
   1   6 -12  540.00   38.29
  -1  -5  12  185.00   14.15
   1   5 -12  159.60   12.41
  -1  -4  12    8.66    3.75
   1   4 -12    6.71    3.55
  -1  -3  12  124.20    9.92
   1   3 -12  115.80    9.51
  -1  -2  12   26.51    4.52
   1   2 -12   35.85    4.73
  -1  -1  12   53.86    5.72
   1   1 -12   49.49    5.23
  -1   0  12  117.30    9.66
   1   0 -12  143.20   11.27
  -1   1  12   59.35    6.30
   1  -1 -12   46.49    5.36
  -1   2  12   33.79    4.79
   1  -2 -12   26.91    4.14
  -1   3  12  117.00    9.74
   1  -3 -12  107.10    8.98
  -1   4  12    5.16    3.86
   1  -4 -12    9.98    3.81
  -1   5  12  198.60   15.08
   1  -5 -12  197.40   14.81
  -1   6  12  538.80   38.24
   1  -6 -12  540.70   38.33
  -1   7  12  175.10   13.42
   1  -7 -12  176.40   13.35
  -1   8  12  593.20   41.91
   1  -8 -12  547.30   38.79
  -1   9  12  240.40   17.71
   1  -9 -12  233.10   17.20
  -1  10  12  166.50   12.99
   1 -10 -12  180.60   13.66
  -1  11  12   56.04    5.64
   1 -11 -12   56.63    5.81
  -1  12  12  315.10   22.93
   1 -12 -12  340.40   24.48
  -1  13  12   -7.51    2.91
   1 -13 -12   -6.32    3.34
  -1  14  12  330.40   23.84
   1 -14 -12  280.60   20.35
  -1  15  12  230.80   17.21
   1 -15 -12  229.80   16.85
  -1  16  12  115.80    9.56
   1 -16 -12  106.30    8.75
  -1  17  12   72.32    6.86
   1 -17 -12   68.35    6.40
  -1  18  12  129.10   10.34
   1 -18 -12  117.50    9.35
  -1  19  12  100.80    8.59
   1 -19 -12   92.21    7.48
  -1  20  12  101.80    8.28
   1 -20 -12   96.16    7.78
  -1  21  12  141.30   11.06
   1 -21 -12  158.50   11.88
   1  24 -11    8.12    5.06
   1  23 -11   40.27    5.74
   1  22 -11   21.61    5.35
   1  21 -11   85.99    8.09
   1  20 -11    3.84    4.77
   1  19 -11    8.41    4.61
   1  18 -11   82.38    7.87
   1  17 -11    6.59    4.15
   1  16 -11   -2.52    3.99
   1  15 -11  159.30   12.51
   1  14 -11   -2.34    3.40
   1  13 -11    4.29    3.64
   1  12 -11  502.20   35.66
   1  11 -11  235.50   17.49
   1  10 -11  145.10   11.42
   1   9 -11  256.30   18.92
   1   8 -11   31.85    4.75
   1   7 -11   43.46    5.25
  -1  -6  11    0.71    3.63
   1   6 -11    3.38    3.50
  -1  -5  11   42.66    5.37
   1   5 -11   39.37    4.87
  -1  -4  11  126.90   10.28
   1   4 -11  115.50    9.40
  -1  -3  11  349.20   25.26
   1   3 -11  394.40   28.29
  -1  -2  11   55.06    5.78
   1   2 -11   44.49    5.19
  -1  -1  11   72.43    6.94
   1   1 -11   93.00    8.08
  -1   0  11   -9.46    3.52
   1   0 -11    3.40    3.40
  -1   1  11   79.00    7.30
   1  -1 -11   79.40    7.22
  -1   2  11   57.84    6.02
   1  -2 -11   58.80    6.05
  -1   3  11  344.70   24.99
   1  -3 -11  384.60   27.64
  -1   4  11  106.70    9.22
   1  -4 -11  111.20    9.30
  -1   5  11   34.04    5.11
   1  -5 -11   35.24    4.60
  -1   6  11    1.26    3.75
   1  -6 -11    1.65    3.06
  -1   7  11   33.18    4.82
   1  -7 -11   38.81    4.90
  -1   8  11   37.96    5.05
   1  -8 -11   41.31    4.79
  -1   9  11  221.60   16.61
   1  -9 -11  221.90   16.52
  -1  10  11  144.60   11.48
   1 -10 -11  157.00   12.15
  -1  11  11  203.20   15.19
   1 -11 -11  184.80   13.99
  -1  12  11  529.70   37.60
   1 -12 -11  497.40   35.27
  -1  13  11    2.96    3.56
   1 -13 -11    4.22    3.31
  -1  14  11   10.61    3.92
   1 -14 -11    7.14    3.27
  -1  15  11  145.80   11.81
   1 -15 -11  136.50   10.77
  -1  16  11    2.39    3.60
   1 -16 -11    2.78    2.86
  -1  17  11    8.44    3.84
   1 -17 -11    4.33    3.25
  -1  18  11   92.31    8.16
   1 -18 -11   92.46    7.92
  -1  19  11   16.87    4.09
   1 -19 -11   12.83    3.59
  -1  20  11    5.53    4.08
   1 -20 -11    1.29    2.79
  -1  21  11   72.43    6.53
   1 -21 -11   65.31    5.81
  -1  22  11   33.07    4.62
   1 -22 -11   34.50    4.13
  -1  23  11   36.72    4.78
   1 -23 -11   37.18    4.40
  -1  24  11    2.77    3.67
   1 -24 -11    0.77    3.28
   1  25 -10   -0.16    5.13
   1  24 -10   11.76    5.09
   1  23 -10    4.83    4.84
   1  22 -10   58.00    6.89
   1  21 -10  158.00   12.58
   1  20 -10    6.95    4.82
   1  19 -10  263.70   19.56
   1  18 -10  160.50   12.72
   1  17 -10  191.80   14.70
   1  16 -10  363.50   26.39
   1  15 -10  621.30   43.98
   1  14 -10   74.83    7.46
   1  13 -10  116.70   10.10
   1  12 -10  345.40   25.11
   1  11 -10  313.70   22.93
   1  10 -10 1723.00  120.00
   1   9 -10   20.82    3.82
   1   8 -10  833.40   58.57
   1   7 -10   83.07    7.38
  -1  -6  10  278.80   20.52
   1   6 -10  281.80   20.71
  -1  -5  10   88.97    8.05
   1   5 -10  101.90    8.80
  -1  -4  10  718.00   50.67
   1   4 -10  707.90   49.96
  -1  -3  10  192.20   14.78
   1   3 -10  181.80   13.99
  -1  -2  10  153.00   12.12
   1   2 -10  158.70   12.37
  -1  -1  10  108.60    9.26
   1   1 -10  101.30    8.62
  -1   0  10  364.90   26.37
   1   0 -10  337.20   24.48
  -1   1  10  105.20    8.86
   1  -1 -10  117.10    9.59
  -1   2  10  150.00   11.87
   1  -2 -10  149.20   11.74
  -1   3  10   87.35    7.83
   1  -3 -10  182.00   13.84
  -1   4  10  546.40   38.77
   1  -4 -10  701.20   49.46
  -1   5  10   87.67    7.76
   1  -5 -10   81.85    7.55
  -1   6  10  267.30   19.81
   1  -6 -10  315.10   22.96
  -1   7  10   84.29    7.82
   1  -7 -10   88.40    7.75
  -1   8  10  833.20   58.63
   1  -8 -10  869.00   60.98
  -1   9  10   24.55    4.58
   1  -9 -10   21.80    3.78
  -1  10  10 2078.00  144.50
   1 -10 -10 1682.00  117.00
  -1  11  10  290.70   21.32
   1 -11 -10  317.20   23.01
  -1  12  10  323.70   23.52
   1 -12 -10  333.40   24.06
  -1  13  10  116.60    9.69
   1 -13 -10  100.60    8.58
  -1  14  10   91.95    7.99
   1 -14 -10   84.46    7.41
  -1  15  10  643.20   45.40
   1 -15 -10  675.90   47.64
  -1  16  10  375.00   27.00
   1 -16 -10  338.70   24.29
  -1  17  10  176.40   13.57
   1 -17 -10  178.20   13.54
  -1  18  10  155.90   12.06
   1 -18 -10  144.10   11.21
  -1  19  10  251.00   18.39
   1 -19 -10  270.20   19.52
  -1  20  10    6.03    3.41
   1 -20 -10    8.53    3.20
  -1  21  10  139.90   11.05
   1 -21 -10  139.80   10.79
  -1  22  10   46.34    5.45
   1 -22 -10   44.78    4.95
  -1  23  10    1.11    3.56
   1 -23 -10   -0.31    3.33
  -1  24  10   12.27    3.68
   1 -24 -10    6.14    3.36
  -1  25  10    3.80    3.82
   1 -25 -10    2.92    3.03
   1  27  -9    4.62    5.09
   1  26  -9   43.44    6.15
   1  25  -9   -1.88    4.44
   1  24  -9   54.07    6.66
   1  23  -9   14.48    5.20
   1  22  -9   68.73    7.00
   1  21  -9    3.58    4.79
   1  20  -9  190.20   14.88
   1  19  -9    2.70    4.56
   1  18  -9   10.09    4.98
   1  17  -9  229.40   17.46
   1  16  -9  514.90   36.79
   1  15  -9   62.26    6.96
   1  14  -9    1.49    4.80
   1  13  -9  161.30   13.02
   1  12  -9  224.80   17.26
   1  11  -9  110.00    9.64
   1  10  -9  348.00   25.39
   1   9  -9  334.40   24.21
   1   8  -9  586.30   41.53
   1   7  -9  924.40   64.88
  -1  -6   9  714.40   50.35
   1   6  -9  675.00   47.65
  -1  -5   9  374.90   27.10
   1   5  -9  353.70   25.68
  -1  -4   9 2068.00  143.80
   1   4  -9 2129.00  148.00
  -1  -3   9  706.30   49.90
   1   3  -9  718.00   50.72
  -1  -2   9   15.87    4.66
   1   2  -9   20.54    4.53
  -1  -1   9  523.80   37.40
   1   1  -9  490.80   35.08
  -1   0   9    0.26    4.27
   1   0  -9   -0.68    3.92
  -1   1   9  456.20   32.79
   1  -1  -9  504.10   35.99
  -1   2   9   16.51    4.70
   1  -2  -9   14.63    4.14
  -1   3   9  760.60   53.72
   1  -3  -9  667.80   47.23
  -1   4   9 2054.00  142.80
   1  -4  -9 2267.00  157.50
  -1   5   9  388.60   28.05
   1  -5  -9  379.30   27.43
  -1   6   9  715.90   50.47
   1  -6  -9  737.40   51.95
  -1   7   9  951.70   66.73
   1  -7  -9  994.20   69.65
  -1   8   9  594.60   42.15
   1  -8  -9  559.60   39.72
  -1   9   9  327.70   23.90
   1  -9  -9  311.60   22.71
  -1  10   9  322.10   23.55
   1 -10  -9  327.60   23.88
  -1  11   9  109.60    9.43
   1 -11  -9  104.90    8.86
  -1  12   9  250.20   18.79
   1 -12  -9  243.50   17.99
  -1  13   9  140.80   11.06
   1 -13  -9  164.40   12.53
  -1  14   9    6.84    3.84
   1 -14  -9    6.32    3.52
  -1  15   9   61.26    6.12
   1 -15  -9   69.77    6.48
  -1  16   9  502.10   35.71
   1 -16  -9  482.00   34.34
  -1  17   9  228.40   16.99
   1 -17  -9  174.50   13.15
  -1  18   9    9.96    3.62
   1 -18  -9    7.11    3.52
  -1  19   9   -2.56    3.26
   1 -19  -9    1.39    3.33
  -1  20   9  167.40   12.84
   1 -20  -9  162.90   12.34
  -1  21   9    2.53    3.61
   1 -21  -9   10.53    2.99
  -1  22   9   72.03    6.80
   1 -22  -9   75.16    6.65
  -1  23   9   19.10    4.09
   1 -23  -9   13.66    3.54
  -1  24   9   37.25    5.06
   1 -24  -9   47.79    5.01
  -1  25   9    2.31    3.65
   1 -25  -9    2.77    3.20
  -1  26   9   43.57    4.98
   1 -26  -9   37.58    4.54
  -1  27   9   48.21    5.37
   1 -27  -9   -1.88    3.06
   1  28  -8   41.19    4.77
   1  28  -8   42.44    6.32
   1  27  -8    7.20    3.47
   1  27  -8    0.99    5.12
   1  26  -8  214.20   16.39
   1  25  -8   -1.97    5.03
   1  24  -8   -0.06    4.48
   1  23  -8  111.90    9.70
   1  22  -8  319.30   23.42
   1  21  -8  340.50   24.72
   1  20  -8  120.50   10.50
   1  19  -8  102.30    9.29
   1  18  -8   94.91    8.53
   1  17  -8   84.69    8.32
   1  16  -8  109.60    9.95
   1  15  -8   -3.35    4.38
   1  14  -8    5.00    4.88
   1  13  -8    8.70    4.93
   1  12  -8   48.31    6.16
   1  11  -8  109.60    9.47
   1  10  -8  656.30   46.42
   1   9  -8  395.20   28.51
   1   8  -8  126.00   10.47
   1   7  -8  286.70   21.11
  -1  -6   8  861.10   60.36
   1   6  -8  696.30   49.11
  -1  -5   8 1155.00   80.67
   1   5  -8 1102.00   77.09
  -1  -4   8    3.87    4.01
   1   4  -8    2.71    3.36
  -1  -3   8  134.60   10.94
   1   3  -8  133.60   10.60
  -1  -2   8  191.40   14.77
   1   2  -8  191.20   14.52
  -1  -1   8   15.74    4.59
   1   1  -8   24.51    4.42
  -1   0   8   12.67    4.52
   1   0  -8    7.40    3.59
  -1   1   8    2.56    3.81
   1  -1  -8   14.23    3.99
  -1   2   8  221.70   16.94
   1  -2  -8  202.40   15.27
  -1   3   8  180.20   13.92
   1  -3  -8  174.20   13.44
  -1   4   8    0.76    3.76
   1  -4  -8   -0.96    2.90
  -1   5   8 1259.00   87.88
   1  -5  -8 1216.00   84.98
  -1   6   8  924.40   64.82
   1  -6  -8  860.60   60.36
  -1   7   8  279.50   20.49
   1  -7  -8  274.70   20.23
  -1   8   8  127.80   10.48
   1  -8  -8  141.90   11.39
  -1   9   8  360.80   26.15
   1  -9  -8  371.70   26.76
  -1  10   8  642.30   45.49
   1 -10  -8  620.50   43.82
  -1  11   8  113.30    9.59
   1 -11  -8  113.50    9.15
  -1  12   8   44.42    5.50
   1 -12  -8   48.12    5.03
  -1  13   8    6.57    4.08
   1 -13  -8   12.06    3.89
  -1  14   8    3.11    3.91
   1 -14  -8    6.62    3.64
  -1  15   8    5.50    3.88
   1 -15  -8    6.59    3.20
  -1  16   8  121.00    9.98
   1 -16  -8  118.30    9.65
  -1  17   8   81.74    7.42
   1 -17  -8   89.60    7.72
  -1  18   8   73.71    6.94
   1 -18  -8   81.99    7.48
  -1  19   8   93.67    8.20
   1 -19  -8   97.25    8.15
  -1  20   8  133.30   10.78
   1 -20  -8  119.00    9.45
  -1  21   8  322.00   23.39
   1 -21  -8  324.90   23.47
  -1  22   8  295.40   21.47
   1 -22  -8  340.20   24.53
  -1  23   8  101.20    8.64
   1 -23  -8  113.90    9.31
  -1  24   8    4.08    3.80
   1 -24  -8    2.90    3.34
  -1  25   8    0.66    3.82
   1 -25  -8    2.24    3.16
  -1  26   8  197.70   14.84
   1 -26  -8  225.70   16.55
  -1  27   8    6.55    3.71
   1 -27  -8   -2.35    3.09
  -1  28   8   51.66    5.67
   1 -28  -8   45.50    4.85
   1  29  -7    8.49    5.17
   1  29  -7   10.03    3.61
   1  28  -7    5.09    3.25
   1  28  -7    7.27    5.17
   1  27  -7  205.00   15.21
   1  27  -7  201.70   15.58
   1  26  -7   11.19    5.18
   1  26  -7   14.58    3.60
   1  25  -7  191.40   14.94
   1  24  -7   14.43    5.15
   1  23  -7  511.80   36.56
   1  22  -7   11.09    4.91
   1  21  -7  779.70   54.92
   1  20  -7    1.92    4.80
   1  19  -7  313.30   23.04
   1  18  -7  337.20   24.69
   1  17  -7  169.10   13.51
   1  16  -7  469.50   33.68
   1  15  -7   34.05    5.47
   1  14  -7    4.51    4.77
   1  13  -7   54.68    6.40
   1  12  -7  238.60   17.86
   1  11  -7   83.31    7.59
   1  10  -7  275.30   20.31
   1   9  -7   78.17    7.43
   1   8  -7    0.38    4.16
   1   7  -7  934.00   65.54
  -1  -6   7   89.18    8.04
   1   6  -7   71.61    6.97
  -1  -5   7 1471.00  102.40
   1   5  -7 1582.00  110.20
  -1  -4   7  213.10   16.03
   1   4  -7  221.00   16.60
  -1  -3   7 2636.00  182.90
   1   3  -7 2509.00  174.10
  -1  -2   7 1153.00   80.63
   1   2  -7 1356.00   94.51
  -1  -1   7 1320.00   92.09
   1   1  -7 1201.00   83.85
  -1   0   7    1.57    3.99
   1   0  -7   -1.50    3.25
  -1   1   7  972.00   68.12
   1  -1  -7 1288.00   89.84
  -1   2   7 1453.00  101.30
   1  -2  -7 1160.00   80.95
  -1   3   7 2551.00  177.00
   1  -3  -7 2494.00  173.10
  -1   4   7  209.90   15.75
   1  -4  -7  199.90   15.05
  -1   5   7 1601.00  111.50
   1  -5  -7 1500.00  104.50
  -1   6   7   69.13    6.63
   1  -6  -7   77.50    6.91
  -1   7   7 1133.00   79.21
   1  -7  -7 1139.00   79.57
  -1   8   7    4.94    3.80
   1  -8  -7    4.12    3.45
  -1   9   7   82.95    7.35
   1  -9  -7   95.11    8.21
  -1  10   7  276.90   20.32
   1 -10  -7  295.30   21.48
  -1  11   7   91.67    8.21
   1 -11  -7   94.36    8.18
  -1  12   7  250.40   18.66
   1 -12  -7  256.70   19.00
  -1  13   7   62.68    6.44
   1 -13  -7   73.93    6.97
  -1  14   7   15.78    4.16
   1 -14  -7    6.66    3.09
  -1  15   7   43.39    5.65
   1 -15  -7   40.06    4.89
  -1  16   7  455.60   32.67
   1 -16  -7  447.10   32.01
  -1  17   7  153.00   12.12
   1 -17  -7  145.00   11.38
  -1  18   7  355.30   25.69
   1 -18  -7  356.40   25.73
  -1  19   7  278.90   20.41
   1 -19  -7  300.90   21.97
  -1  20   7    2.18    3.49
   1 -20  -7    2.92    3.32
  -1  21   7  828.30   58.23
   1 -21  -7  841.20   59.00
  -1  22   7   16.43    4.14
   1 -22  -7   11.85    3.35
  -1  23   7  492.30   34.93
   1 -23  -7  507.70   35.95
  -1  24   7   11.60    3.70
   1 -24  -7   -2.84    2.87
  -1  25   7  184.30   14.09
   1 -25  -7  184.90   13.73
  -1  26   7   16.18    4.11
   1 -26  -7   18.18    3.27
  -1  27   7  213.30   15.90
   1 -27  -7  209.10   15.40
  -1  28   7    8.46    3.88
  -1  29   7    7.62    3.54
   1  30  -6   25.80    5.74
   1  30  -6   25.76    4.06
   1  29  -6    7.87    5.17
   1  29  -6    5.73    3.36
   1  28  -6   88.49    8.51
   1  28  -6  101.20    8.47
   1  27  -6   10.78    5.15
   1  27  -6   22.76    4.08
   1  26  -6   46.90    6.37
   1  26  -6   33.71    4.35
   1  25  -6   -2.52    4.83
   1  25  -6    2.70    2.97
   1  24  -6 1001.00   70.12
   1  24  -6  961.10   67.25
   1  23  -6    4.88    5.18
   1  22  -6  502.10   35.93
   1  21  -6  124.20   10.64
   1  20  -6  354.90   25.87
   1  19  -6   33.42    5.74
   1  18  -6  107.20    9.72
   1  17  -6 1596.00  111.30
   1  16  -6   -7.83    4.95
   1  15  -6 1801.00  125.30
   1  14  -6   33.41    5.45
   1  13  -6   -3.05    3.73
   1  12  -6 1081.00   75.64
   1  11  -6   42.76    5.56
   1  10  -6   87.11    8.02
   1   9  -6  627.30   44.35
   1   8  -6   19.68    4.70
   1   7  -6   27.31    4.74
  -1  -6   6  612.40   43.32
   1   6  -6  610.10   43.15
  -1  -5   6   32.92    5.18
   1   5  -6   29.54    4.69
  -1  -4   6 3775.00  261.50
   1   4  -6 3689.00  255.60
  -1  -3   6  404.20   29.02
   1   3  -6  413.60   29.62
  -1  -2   6 6334.00  438.30
   1   2  -6 6292.00  435.30
  -1  -1   6   21.39    4.74
   1   1  -6   21.06    4.06
  -1   0   6 4173.00  289.00
   1   0  -6 4126.00  285.80
  -1   1   6   19.52    4.24
   1  -1  -6   32.48    4.76
  -1   2   6 6575.00  454.90
   1  -2  -6 6354.00  439.70
  -1   3   6  363.50   26.22
   1  -3  -6  374.10   26.93
  -1   4   6 3785.00  262.30
   1  -4  -6 3723.00  258.00
  -1   5   6   35.17    4.95
   1  -5  -6   37.21    4.87
  -1   6   6  563.30   39.94
   1  -6  -6  594.10   41.96
  -1   7   6   19.67    4.02
   1  -7  -6   17.95    3.07
  -1   8   6   22.39    4.13
   1  -8  -6   21.08    3.65
  -1   9   6  667.50   47.07
   1  -9  -6  608.30   42.97
  -1  10   6  112.60    9.44
   1 -10  -6  116.20    9.35
  -1  11   6   36.66    4.96
   1 -11  -6   49.93    5.78
  -1  12   6 1126.00   78.68
   1 -12  -6 1118.00   78.14
  -1  13   6    4.71    3.53
   1 -13  -6    1.44    3.67
  -1  14   6   50.34    5.91
   1 -14  -6   61.91    6.34
  -1  15   6 1740.00  121.20
   1 -15  -6 1754.00  122.00
  -1  16   6    4.10    3.87
   1 -16  -6    0.76    3.40
  -1  17   6 1661.00  115.80
   1 -17  -6 1472.00  102.60
  -1  18   6  113.50    9.54
   1 -18  -6  107.80    9.12
  -1  19   6   44.24    5.10
   1 -19  -6   36.60    4.71
  -1  20   6  358.90   25.90
   1 -20  -6  355.10   25.60
  -1  21   6  115.90    9.62
   1 -21  -6  104.30    8.66
  -1  22   6  541.80   38.46
   1 -22  -6  510.60   36.24
  -1  23   6   13.94    3.90
   1 -23  -6    0.95    2.79
  -1  24   6 1023.00   71.53
   1 -24  -6 1037.00   72.44
  -1  25   6    5.58    3.62
   1 -25  -6    1.28    2.70
  -1  26   6   39.02    5.11
   1 -26  -6   36.73    4.55
  -1  27   6   25.66    4.02
  -1  28   6   86.07    7.50
  -1  29   6   10.80    4.00
  -1  30   6   18.06    4.30
   1  31  -5   -0.51    3.67
   1  30  -5  105.60    8.67
   1  29  -5  184.00   13.83
   1  28  -5  108.90    9.09
   1  27  -5   54.72    5.63
   1  26  -5   17.13    3.74
   1  25  -5  419.50   29.94
   1  24  -5   29.85    4.59
   1  23  -5  662.40   46.79
   1  22  -5   -0.95    2.69
   1  14  -5  160.10   12.61
   1  13  -5  368.00   26.53
   1  12  -5   10.02    4.13
   1  11  -5  160.50   12.55
   1  10  -5  349.20   25.35
   1   9  -5  104.50    9.24
   1   8  -5  935.70   65.56
   1   7  -5 1121.00   78.32
   1   6  -5  395.10   28.36
  -1  -5   5  117.10    9.67
   1   5  -5  118.60    9.79
  -1  -4   5  170.10   13.16
   1   4  -5  159.70   12.37
  -1  -3   5   53.69    5.91
   1   3  -5   52.46    5.55
  -1  -2   5 1305.00   90.96
   1   2  -5 1254.00   87.38
  -1  -1   5  539.20   38.17
   1   1  -5  517.70   36.62
  -1   0   5   -1.22    4.23
   1   0  -5   -0.90    3.36
  -1   1   5  499.90   35.42
   1  -1  -5  509.20   36.05
  -1   2   5 1214.00   84.71
   1  -2  -5 1272.00   88.63
  -1   3   5   56.64    6.10
   1  -3  -5   50.13    5.08
  -1   4   5  163.60   12.54
   1  -4  -5  148.90   11.57
  -1   5   5  108.10    8.98
   1  -5  -5  102.90    8.62
  -1   6   5  391.60   27.98
   1  -6  -5  391.60   28.00
  -1   7   5 1103.00   77.01
   1  -7  -5 1113.00   77.69
  -1   8   5  801.70   56.29
   1  -8  -5  791.50   55.54
  -1   9   5  107.50    9.00
   1  -9  -5  130.00   10.39
  -1  10   5  329.50   23.83
   1 -10  -5  323.90   23.41
  -1  11   5  145.50   11.39
   1 -11  -5  149.50   11.62
  -1  12   5   13.46    3.82
   1 -12  -5   11.37    3.30
  -1  13   5  376.40   27.03
   1 -13  -5  384.80   27.60
  -1  14   5  148.30   11.60
   1 -14  -5  138.80   11.05
  -1  15   5    5.77    3.52
   1 -15  -5    3.24    3.58
  -1  16   5  370.50   26.74
   1 -16  -5  362.90   26.14
  -1  17   5   96.57    8.49
   1 -17  -5  106.00    8.81
  -1  18   5 1282.00   89.59
   1 -18  -5 1120.00   78.37
  -1  19   5   49.24    5.85
   1 -19  -5   79.09    7.36
  -1  20   5   10.84    3.59
   1 -20  -5   13.32    3.80
  -1  21   5    3.25    3.74
   1 -21  -5    8.96    3.54
  -1  22   5    5.27    3.78
   1 -22  -5    6.78    3.50
  -1  23   5  640.70   45.23
   1 -23  -5  660.60   46.62
  -1  24   5   38.04    5.23
   1 -24  -5   31.78    4.50
  -1  25   5  435.60   31.12
  -1  26   5    3.96    3.19
  -1  27   5   60.76    5.96
  -1  28   5  132.10   10.58
  -1  29   5  182.20   13.73
  -1  30   5   96.40    8.20
  -1  31   5    3.57    3.91
   1  31  -4   90.88    7.83
   1  30  -4   41.45    4.73
   1  29  -4  176.40   13.37
   1  28  -4  111.70    9.10
   1  27  -4   19.91    4.28
   1  26  -4  185.80   14.19
   1  25  -4   37.52    4.68
   1  24  -4   16.32    4.32
   1  23  -4   21.45    4.53
   1  22  -4  165.10   12.78
   1  21  -4   31.63    4.36
   1  20  -4  264.00   19.48
   1   9  -4  823.50   57.77
   1   8  -4   30.78    4.94
   1   7  -4 1516.00  105.40
   1   6  -4 1665.00  115.70
   1   5  -4   25.21    4.47
  -1  -4   4   37.49    4.93
   1   4  -4   40.06    4.88
  -1  -3   4  392.90   28.03
   1   3  -4  411.30   29.36
  -1  -2   4 2080.00  144.30
   1   2  -4 2164.00  150.10
  -1  -1   4  989.60   69.13
   1   1  -4  935.40   65.40
  -1   0   4  139.10   10.91
   1   0  -4  134.40   10.74
  -1   1   4 1009.00   70.46
   1  -1  -4  954.20   66.71
  -1   2   4 1899.00  131.90
   1  -2  -4 2493.00  172.90
  -1   3   4  400.30   28.56
   1  -3  -4  412.90   29.42
  -1   4   4   33.28    4.57
   1  -4  -4   25.06    3.92
  -1   5   4   27.30    4.08
   1  -5  -4   25.55    3.74
  -1   6   4 1953.00  135.60
   1  -6  -4 1961.00  136.10
  -1   7   4 1415.00   98.48
   1  -7  -4 1466.00  102.00
  -1   8   4   27.04    3.86
   1  -8  -4   30.09    4.30
  -1   9   4  785.30   55.08
   1  -9  -4  794.80   55.74
  -1  10   4 1066.00   74.46
   1 -10  -4 1063.00   74.26
  -1  11   4   65.60    6.46
   1 -11  -4   72.11    6.71
  -1  12   4 1161.00   80.97
   1 -12  -4 1113.00   77.73
  -1  13   4  169.60   13.04
   1 -13  -4  155.60   12.02
  -1  14   4 2303.00  159.90
   1 -14  -4 2127.00  147.80
  -1  15   4  375.00   26.96
   1 -15  -4  297.40   21.67
  -1  16   4  278.60   20.41
   1 -16  -4  273.30   20.06
  -1  17   4  112.80    9.50
   1 -17  -4  121.20    9.74
  -1  18   4    3.53    3.72
   1 -18  -4    2.46    3.07
  -1  19   4  402.60   28.94
   1 -19  -4  416.50   29.87
  -1  20   4  268.10   19.77
   1 -20  -4  285.50   20.91
  -1  21   4   30.91    4.36
   1 -21  -4   24.82    4.02
  -1  22   4  195.50   14.78
   1 -22  -4  199.00   15.02
  -1  23   4   19.25    3.82
  -1  24   4   30.76    4.65
  -1  25   4   25.73    4.61
  -1  26   4  240.50   17.71
  -1  27   4   26.05    4.55
  -1  28   4  136.10   10.80
  -1  29   4  213.10   15.85
  -1  30   4   51.83    5.53
  -1  31   4   95.51    8.18
   1  32  -3    7.36    3.73
   1  31  -3  138.30   10.70
   1  30  -3    5.38    3.84
   1  29  -3    3.27    3.25
   1  28  -3  124.50   10.10
   1  27  -3   70.44    6.49
   1  26  -3   10.37    3.96
   1  25  -3   13.80    3.79
   1  24  -3    6.33    3.93
   1  23  -3   95.96    8.20
   1  22  -3  517.50   36.93
   1  21  -3   84.77    7.95
   1  20  -3   75.04    7.19
   1  19  -3  250.70   18.62
   1  18  -3   18.32    4.13
   1   6  -3 2624.00  181.90
   1   5  -3  625.10   43.99
   1   4  -3   91.91    8.24
  -1  -3   3 1384.00   96.31
   1   3  -3 1513.00  105.10
  -1  -1   3  113.30    9.29
   1   1  -3   95.92    7.87
  -1   0   3    1.42    3.80
   1   0  -3   -1.28    3.52
  -1   1   3  114.40    9.41
   1  -1  -3   95.77    8.00
  -1   3   3 1384.00   96.25
   1  -3  -3  926.20   64.72
  -1   4   3   91.98    7.81
   1  -4  -3   92.75    7.60
  -1   5   3  702.30   49.31
   1  -5  -3  672.40   47.25
  -1   6   3 1326.00   92.32
   1  -6  -3 2886.00  200.00
  -1   7   3  653.00   45.88
   1  -7  -3  663.90   46.63
  -1   8   3  199.30   14.83
   1  -8  -3  192.50   14.20
  -1   9   3  357.20   25.62
   1  -9  -3  368.80   26.34
  -1  10   3  286.70   20.78
   1 -10  -3  289.60   21.02
  -1  11   3 1374.00   95.68
   1 -11  -3 1439.00  100.20
  -1  12   3  168.20   12.93
   1 -12  -3  179.00   13.53
  -1  13   3 5071.00  351.00
   1 -13  -3 5048.00  349.40
  -1  14   3   21.49    4.17
   1 -14  -3   39.56    4.67
  -1  15   3  676.80   47.68
   1 -15  -3  627.10   44.28
  -1  16   3  242.70   17.91
   1 -16  -3  223.10   16.62
  -1  17   3  125.70   10.29
   1 -17  -3  103.20    8.81
  -1  18   3   26.31    4.80
   1 -18  -3   27.91    4.48
  -1  19   3  280.50   20.68
   1 -19  -3  222.00   16.53
  -1  20   3   78.93    7.38
  -1  21   3  108.10    9.21
  -1  22   3  481.90   34.43
  -1  23   3   98.42    8.62
  -1  24   3   11.48    3.58
  -1  25   3    7.69    4.00
  -1  26   3   -1.52    3.12
  -1  27   3   78.80    7.31
  -1  28   3  145.90   11.25
  -1  29   3    2.59    3.60
  -1  30   3   12.45    4.01
  -1  31   3  132.40   10.31
  -1  32   3    0.81    3.27
   1  32  -2  149.20   11.39
   1  31  -2    8.73    3.90
   1  30  -2   17.49    3.89
   1  29  -2   21.57    3.82
   1  28  -2   24.71    4.53
   1  27  -2   45.93    5.33
   1  26  -2   50.69    5.11
   1  25  -2  146.50   11.70
   1  24  -2  317.00   23.07
   1  23  -2  269.90   19.88
   1  22  -2  130.90   10.87
   1  21  -2    0.84    3.85
   1  20  -2  810.40   57.06
   1  19  -2 1067.00   74.66
   1  18  -2  183.20   14.03
   1  17  -2 1127.00   78.75
   1  16  -2  232.30   17.15
   1  15  -2  632.70   44.64
   1  14  -2   18.61    3.84
   1   4  -2   16.29    4.17
   1   3  -2 2348.00  162.60
  -1  -2   2   73.07    6.07
   1   2  -2   56.27    5.15
  -1  -1   2 1623.00  112.50
   1   1  -2 1662.00  115.10
  -1   0   2  650.30   45.32
   1   0  -2  725.50   50.50
  -1   1   2 1554.00  107.70
   1  -1  -2 1588.00  110.00
  -1   2   2   50.62    4.88
   1  -2  -2   60.78    5.32
  -1   3   2 2339.00  162.00
   1  -3  -2 2439.00  168.90
  -1   4   2   12.11    3.76
   1  -4  -2   22.51    4.01
  -1   5   2 1613.00  112.10
   1  -5  -2 1803.00  125.20
  -1   6   2 3135.00  217.10
   1  -6  -2 3090.00  214.10
  -1   7   2   62.66    5.83
   1  -7  -2   68.53    6.60
  -1   8   2 3773.00  261.20
   1  -8  -2 4003.00  277.10
  -1   9   2   87.96    7.74
   1  -9  -2  103.60    8.66
  -1  10   2 2231.00  154.90
   1 -10  -2 2454.00  170.20
  -1  11   2   33.87    4.65
   1 -11  -2   37.60    4.66
  -1  12   2 3944.00  273.10
   1 -12  -2 3758.00  260.40
  -1  13   2  253.10   18.73
   1 -13  -2  265.90   19.45
  -1  14   2   28.54    4.51
   1 -14  -2   26.45    4.15
  -1  15   2  612.40   43.26
   1 -15  -2  574.50   40.63
  -1  16   2  243.70   18.06
   1 -16  -2  213.00   15.90
  -1  17   2 1119.00   78.25
  -1  18   2  191.80   14.54
  -1  19   2  991.90   69.48
  -1  20   2  834.90   58.73
  -1  21   2    6.88    3.77
  -1  22   2  116.60    9.91
  -1  23   2  232.00   17.39
  -1  24   2  305.90   22.30
  -1  25   2  144.90   11.38
  -1  26   2   59.67    5.93
  -1  27   2   50.86    5.63
  -1  28   2   22.39    4.33
  -1  29   2   15.30    4.31
  -1  30   2   19.77    3.84
  -1  31   2    1.76    3.12
  -1  32   2  189.70   14.10
   1  32  -1    9.18    3.77
   1  31  -1   59.14    6.01
   1  30  -1   57.78    5.86
   1  29  -1   27.58    4.20
   1  28  -1   76.61    6.88
   1  27  -1   47.45    5.37
   1  26  -1    8.54    3.92
   1  25  -1   -0.53    4.01
   1  24  -1   46.18    5.54
   1  23  -1    7.91    3.57
   1  22  -1  576.60   40.86
   1  21  -1  222.40   16.73
   1  20  -1    3.14    3.76
   1  19  -1   91.41    8.11
   1  18  -1  761.70   53.58
   1  17  -1 1564.00  108.90
   1  16  -1   28.49    4.49
   1  15  -1  758.70   53.31
   1  14  -1  242.40   17.91
   1  13  -1 1082.00   75.53
   1  12  -1    1.59    3.20
   1  11  -1 5806.00  401.70
   1  10  -1 2935.00  203.40
   1   2  -1   37.86    3.41
  -1  -1   1  135.30    9.65
   1   1  -1  146.00   10.35
  -1   0   1   -0.35    1.26
   1   0  -1    2.86    1.31
  -1   1   1  142.60   10.21
   1  -1  -1  144.80   10.30
  -1   2   1   25.51    2.86
   1  -2  -1   33.42    3.25
  -1   3   1    5.68    2.59
   1  -3  -1    3.21    2.50
  -1   4   1    5.67    3.06
   1  -4  -1    5.70    2.74
   1  -7  -1 8934.00  617.70
  -1   8   1 3306.00  229.00
   1  -8  -1 3046.00  211.10
  -1   9   1 7662.00  529.90
  -1  10   1 2909.00  201.70
   1 -10  -1 2815.00  195.10
  -1  11   1 6027.00  417.00
   1 -11  -1 6074.00  420.30
  -1  12   1    1.38    3.22
  -1  13   1 1027.00   71.93
  -1  14   1  223.90   16.61
  -1  15   1  702.40   49.47
  -1  16   1   25.47    4.05
  -1  17   1 1675.00  116.60
  -1  18   1  752.50   52.94
  -1  19   1   93.47    8.25
  -1  20   1   -0.32    3.95
  -1  21   1  205.10   15.61
  -1  22   1  539.10   38.31
  -1  23   1    2.41    3.88
  -1  24   1   52.40    6.12
  -1  25   1   -1.57    3.79
  -1  26   1    3.46    3.52
  -1  27   1   48.75    5.43
  -1  28   1   63.77    6.18
  -1  29   1   34.79    4.50
  -1  30   1   73.84    6.52
  -1  31   1   70.10    6.34
  -1  32   1    5.92    3.64
   1  32   0    7.09    3.66
   1  31   0  142.10   11.11
   1  30   0   -2.77    3.57
   1  29   0   34.59    4.97
   1  28   0   18.46    4.33
   1  27   0   21.10    4.40
   1  26   0    8.12    3.92
   1  25   0  205.30   15.70
   1  24   0   83.46    7.73
   1  23   0  131.40   10.73
   1  22   0    4.90    3.88
   1  21   0  199.50   15.13
   1  20   0  797.60   56.06
   1  19   0    0.29    3.68
   1  18   0  147.70   11.56
   1  17   0  186.80   14.17
   1  16   0  508.40   36.10
   1  15   0  110.40    9.12
   1  14   0   55.96    5.67
   1  13   0  368.00   26.32
   1  12   0   -1.12    3.07
   1  11   0 1099.00   76.75
   1  10   0  288.90   20.86
   1   9   0   99.80    8.14
   1   8   0  161.10   12.09
   1   7   0 1244.00   86.54
   1   6   0   77.71    6.68
  -1  -4   0  418.60   29.30
   1   4   0  383.90   26.91
  -1  -3   0 2965.00  205.00
  -1  -2   0    3.32    1.23
   1   2   0    2.08    1.15
  -1  -1   0  470.20   32.58
   1   1   0  514.60   35.66
  -1   3   0 3050.00  211.00
  -1   4   0  440.90   31.02
  -1   6   0   66.88    6.59
  -1   7   0 1376.00   95.76
  -1   8   0  148.40   11.42
  -1   9   0  115.20    9.29
  -1  10   0  250.70   18.40
  -1  11   0 1088.00   75.93
  -1  12   0    3.56    3.65
  -1  13   0  386.50   27.86
  -1  14   0   67.03    6.62
  -1  15   0  126.60   10.29
  -1  16   0  527.20   37.53
  -1  17   0  209.20   15.79
  -1  18   0  143.10   11.51
  -1  19   0    0.93    3.73
  -1  20   0  739.10   52.05
  -1  21   0  212.10   16.14
  -1  22   0   -5.60    4.15
  -1  23   0  132.50   11.03
  -1  24   0   84.34    7.95
  -1  25   0  181.00   14.01
  -1  26   0   -6.95    3.60
  -1  27   0   20.50    4.32
  -1  28   0   13.51    4.08
  -1  29   0   26.59    4.41
  -1  30   0    2.95    3.32
  -1  31   0  149.20   11.45
  -1  32   0    5.82    3.17
   1  32   1    5.53    3.55
   1  31   1   98.74    8.18
   1  30   1   11.62    3.45
   1  29   1   14.32    3.68
   1  28   1  100.10    8.61
   1  27   1  204.40   15.41
   1  26   1   59.53    6.10
   1  25   1  286.70   20.99
   1  24   1   61.16    6.14
   1  23   1  127.10   10.40
   1  22   1   52.55    5.81
   1  21   1  688.80   48.57
   1  20   1  301.00   22.05
   1  19   1 1316.00   91.78
   1  18   1  107.80    9.18
   1  17   1    4.30    3.22
   1  16   1  491.60   34.95
   1  15   1    6.29    3.50
   1  14   1   67.65    6.31
  -1 -13  -1    4.69    2.60
   1  13   1   -3.64    3.01
  -1 -12  -1   36.81    4.27
   1  12   1   25.22    3.92
  -1 -11  -1  178.10   13.25
   1  11   1  169.20   12.81
  -1 -10  -1  299.50   21.46
   1  10   1  285.60   20.65
  -1  -9  -1    7.64    2.91
   1   9   1    6.44    2.86
  -1  -8  -1  453.70   32.02
   1   8   1  418.60   29.67
  -1  -7  -1  410.90   29.08
   1   7   1  435.30   30.77
  -1  -6  -1  686.20   48.00
   1   6   1  716.00   50.09
  -1  -5  -1  803.00   55.96
   1   5   1  782.90   54.59
  -1  -4  -1  571.30   39.87
   1   4   1  550.90   38.50
  -1  -3  -1   15.07    2.40
   1   3   1   11.52    2.50
  -1  -2  -1  637.90   44.34
   1   2   1  626.00   43.50
  -1   0  -1   -2.16    2.06
   1   0   1   -0.93    2.12
  -1  11  -1  171.40   13.09
  -1  12  -1   21.71    4.27
  -1  13  -1    9.96    3.37
  -1  14  -1   66.02    6.59
  -1  15  -1    7.38    2.90
  -1  16  -1  517.20   36.83
  -1  17  -1    8.30    3.52
  -1  18  -1  113.50    9.55
  -1  19  -1 1337.00   93.33
  -1  20  -1  312.70   22.77
  -1  21  -1  813.30   57.15
  -1  22  -1   55.27    6.12
  -1  23  -1  123.50   10.41
  -1  24  -1   65.32    6.67
  -1  25  -1  312.20   22.63
  -1  26  -1   60.33    5.93
  -1  27  -1  184.80   14.01
  -1  28  -1  106.00    9.01
  -1  29  -1    8.62    3.70
  -1  30  -1    3.11    3.10
  -1  31  -1   74.93    6.71
  -1  32  -1   -1.98    3.52
   1  32   2   26.85    3.90
   1  31   2    1.04    3.66
   1  30   2    7.87    3.81
   1  29   2   70.42    6.65
   1  28   2  300.30   21.77
   1  27   2   67.51    6.70
   1  26   2  859.70   60.23
   1  25   2  153.10   11.97
   1  24   2  706.20   49.80
   1  23   2  309.30   22.51
   1  22   2 1216.00   84.88
   1  21   2   28.34    4.74
   1  20   2  554.00   39.34
   1  19   2    9.63    3.67
   1  18   2 1023.00   71.62
  -1 -17  -2    1.41    3.26
   1  17   2    2.62    3.17
  -1 -16  -2   26.56    3.90
   1  16   2   13.13    3.39
  -1 -15  -2  182.40   13.76
   1  15   2  177.10   13.45
  -1 -14  -2    5.60    3.33
   1  14   2   -0.37    3.37
  -1 -13  -2   67.94    6.30
   1  13   2   50.97    5.28
  -1 -12  -2  175.20   13.18
   1  12   2  158.20   12.06
  -1 -11  -2   22.10    3.77
   1  11   2   11.56    3.24
  -1 -10  -2  117.60    9.21
   1  10   2  126.30   10.00
  -1  -9  -2 2011.00  139.60
   1   9   2 1911.00  132.70
  -1  -8  -2  292.70   20.97
   1   8   2  279.90   20.19
  -1  -7  -2  497.20   35.02
   1   7   2  422.90   29.95
  -1  -6  -2    7.14    2.95
   1   6   2    6.36    2.98
  -1  -5  -2   16.03    3.16
   1   5   2    8.47    3.21
  -1  -4  -2  588.70   41.25
   1   4   2  578.00   40.55
  -1  -1  -2  614.20   42.93
   1   1   2  610.00   42.68
  -1   0  -2  972.50   67.66
   1   0   2  920.50   64.07
  -1   1  -2  604.90   42.36
   1  -1   2  603.20   42.25
  -1   3  -2 5535.00  382.80
  -1  15  -2  184.10   14.07
  -1  16  -2   17.02    3.73
  -1  17  -2    7.11    3.84
  -1  18  -2 1003.00   70.35
  -1  19  -2    3.34    3.42
  -1  20  -2  532.70   37.94
  -1  21  -2   27.40    4.28
  -1  22  -2 1192.00   83.22
  -1  23  -2  397.50   28.50
  -1  24  -2  611.50   43.31
  -1  25  -2  149.30   11.88
  -1  26  -2  692.70   48.65
  -1  27  -2   56.69    5.79
  -1  28  -2  266.30   19.59
  -1  29  -2   73.86    6.27
  -1  30  -2    2.52    3.59
  -1  31  -2    4.73    3.83
  -1  32  -2   15.43    3.41
   1  32   3    2.15    3.94
   1  31   3   34.30    4.75
   1  30   3   18.46    3.84
   1  29   3   15.49    4.11
   1  28   3   13.64    3.85
   1  27   3  240.00   17.78
   1  26   3   15.65    3.65
   1  25   3  326.80   23.66
   1  24   3   95.88    8.38
   1  23   3  614.90   43.44
   1  22   3  114.40    9.43
   1  21   3  294.80   21.48
  -1 -20  -3   28.70    4.35
   1  20   3   30.94    4.52
  -1 -19  -3    6.41    3.25
   1  19   3    1.05    3.06
  -1 -18  -3   98.46    8.40
   1  18   3  107.70    8.93
  -1 -17  -3 1260.00   87.96
   1  17   3 1270.00   88.65
  -1 -16  -3  642.00   45.20
   1  16   3  643.30   45.35
  -1 -15  -3  103.00    8.49
   1  15   3  104.10    8.76
  -1 -14  -3   30.70    4.32
   1  14   3   34.19    4.81
  -1 -13  -3  102.70    8.42
   1  13   3   95.49    8.17
  -1 -12  -3  313.80   22.56
   1  12   3  314.30   22.68
  -1 -11  -3   84.92    7.34
   1  11   3   78.09    6.89
  -1 -10  -3   76.99    6.66
   1  10   3   51.81    5.32
  -1  -9  -3  450.90   31.92
   1   9   3  479.90   33.96
  -1  -8  -3   22.64    3.64
   1   8   3   14.97    3.47
  -1  -7  -3   -0.53    2.86
   1   7   3    6.73    3.33
  -1  -6  -3  240.80   17.41
   1   6   3  258.10   18.72
  -1  -5  -3  356.20   25.34
   1   5   3  339.70   24.29
  -1  -4  -3  576.40   40.51
   1   4   3  588.90   41.40
  -1  -3  -3 2839.00  196.70
   1   3   3 3193.00  221.20
  -1  -2  -3 3353.00  232.10
   1   2   3 3458.00  239.40
  -1  -1  -3  139.80   10.79
   1   1   3  145.00   11.07
  -1   0  -3    1.64    3.23
   1   0   3    3.03    3.63
  -1   1  -3  144.60   11.19
   1  -1   3  162.00   12.49
  -1   2  -3 3153.00  218.40
   1  -2   3 3327.00  230.40
  -1   3  -3 2901.00  201.00
   1  -3   3 3610.00  250.00
  -1   4  -3  550.20   38.77
  -1   5  -3  357.20   25.54
  -1   6  -3  251.20   18.46
  -1  18  -3   98.65    8.59
  -1  19  -3    2.05    3.27
  -1  20  -3   44.85    5.61
  -1  21  -3  261.40   19.34
  -1  22  -3  122.10    9.72
  -1  23  -3  641.40   45.27
  -1  24  -3  112.40    9.29
  -1  25  -3  301.10   22.03
  -1  26  -3   11.05    3.58
  -1  27  -3  219.00   16.27
  -1  28  -3    9.25    2.93
  -1  29  -3   10.49    3.71
  -1  30  -3   13.88    3.29
  -1  31  -3   21.60    4.06
  -1  32  -3    3.25    3.90
   1  31   4   42.39    5.16
   1  30   4    9.60    3.89
   1  29   4  377.00   27.05
   1  28   4    7.76    3.80
   1  27   4  155.10   12.04
   1  26   4  129.90   10.49
   1  25   4  193.30   14.55
   1  24   4   79.48    7.34
   1  23   4   10.14    3.43
  -1 -22  -4  249.90   18.33
   1  22   4  245.20   18.02
  -1 -21  -4   96.33    8.10
   1  21   4   88.99    7.76
  -1 -20  -4    9.96    3.41
   1  20   4   17.72    4.10
  -1 -19  -4   62.02    6.03
   1  19   4   52.45    5.82
  -1 -18  -4  181.60   13.80
   1  18   4  196.50   14.85
  -1 -17  -4  361.50   26.08
   1  17   4  379.20   27.34
  -1 -16  -4  629.50   44.41
   1  16   4  611.20   43.26
  -1 -15  -4  101.50    8.37
   1  15   4   87.98    7.77
  -1 -14  -4  569.70   40.24
   1  14   4  661.90   46.69
  -1 -13  -4    8.08    3.45
   1  13   4    3.22    2.90
  -1 -12  -4  573.90   40.58
   1  12   4  552.10   39.11
  -1 -11  -4   10.83    3.05
   1  11   4    2.64    3.26
  -1 -10  -4   57.26    5.56
   1  10   4   48.33    5.06
  -1  -9  -4 1684.00  117.00
   1   9   4 1717.00  119.30
  -1  -8  -4   36.13    4.39
   1   8   4   18.21    3.67
  -1  -7  -4  613.00   43.12
   1   7   4  615.00   43.31
  -1  -6  -4    4.40    3.14
   1   6   4    3.38    3.30
  -1  -5  -4   83.24    6.90
   1   5   4   92.80    7.83
  -1  -4  -4  272.00   19.61
   1   4   4  181.00   13.67
  -1  -3  -4 3087.00  213.80
   1   3   4 4702.00  325.50
  -1  -2  -4    7.58    3.04
   1   2   4    7.89    3.36
  -1  -1  -4  350.10   25.01
   1   1   4  397.30   28.36
  -1   0  -4  273.70   19.75
   1   0   4  278.80   20.18
  -1   1  -4  376.10   26.76
   1  -1   4  397.80   28.42
  -1   2  -4   -1.19    3.39
   1  -2   4    7.78    4.04
  -1   3  -4 4342.00  300.50
   1  -3   4 4876.00  337.50
  -1   4  -4  290.60   21.11
  -1   5  -4   89.48    7.74
  -1   6  -4    9.13    4.07
  -1   7  -4  614.40   43.39
  -1   8  -4   20.53    4.86
  -1   9  -4 1623.00  113.00
  -1  21  -4   91.96    8.18
  -1  22  -4  251.80   18.61
  -1  23  -4   11.51    3.88
  -1  24  -4   86.99    7.74
  -1  25  -4  260.60   19.12
  -1  26  -4  133.90   10.59
  -1  27  -4  122.40    9.81
  -1  28  -4   12.28    3.87
  -1  29  -4  384.90   27.52
  -1  30  -4   15.40    3.83
  -1  31  -4   33.56    4.12
   1  30   5   27.55    4.56
   1  29   5   42.19    5.05
   1  28   5  140.10   10.97
   1  27   5   49.56    5.62
   1  26   5    9.33    3.95
   1  25   5    5.75    3.84
  -1 -24  -5   35.33    4.45
   1  24   5   40.95    5.20
  -1 -23  -5    3.90    3.19
   1  23   5    7.85    3.83
  -1 -22  -5    8.18    3.40
   1  22   5   10.12    3.88
  -1 -21  -5  124.00    9.78
   1  21   5  119.70    9.69
  -1 -20  -5  148.40   11.56
   1  20   5  146.70   11.67
  -1 -19  -5  613.90   43.41
   1  19   5  656.20   46.32
  -1 -18  -5  121.20    9.82
   1  18   5  123.80   10.13
  -1 -17  -5    0.09    3.13
   1  17   5    5.66    3.94
  -1 -16  -5  302.30   22.01
   1  16   5  308.20   22.50
  -1 -15  -5 1076.00   75.26
   1  15   5  986.70   69.11
  -1 -14  -5    2.83    3.53
   1  14   5   -1.24    2.89
  -1 -13  -5 2089.00  145.00
   1  13   5 2108.00  146.50
  -1 -12  -5   53.68    5.54
   1  12   5   53.29    5.66
  -1 -11  -5  899.90   62.98
   1  11   5  852.40   59.82
  -1 -10  -5  329.10   23.73
   1  10   5  338.30   24.48
  -1  -9  -5 2928.00  203.00
   1   9   5 3051.00  211.50
  -1  -8  -5 1524.00  106.00
   1   8   5 1465.00  102.00
  -1  -7  -5 1403.00   97.67
   1   7   5 1617.00  112.40
  -1  -6  -5  849.40   59.44
   1   6   5  891.70   62.38
  -1  -5  -5   97.80    8.08
   1   5   5  103.80    8.78
  -1  -4  -5 6352.00  439.40
   1   4   5 6486.00  448.70
  -1  -3  -5  324.30   23.40
   1   3   5  370.50   26.51
  -1  -2  -5 1613.00  112.20
   1   2   5 1593.00  110.80
  -1  -1  -5  163.90   12.50
   1   1   5  196.90   14.86
  -1   0  -5    2.26    3.28
   1   0   5   -3.10    3.84
  -1   1  -5  160.40   12.27
   1  -1   5  172.90   13.37
  -1   2  -5 1655.00  115.00
   1  -2   5 1660.00  115.40
  -1   3  -5  369.50   26.51
   1  -3   5  323.50   23.47
  -1   4  -5 6965.00  481.80
   1  -4   5 6200.00  428.90
  -1   5  -5   97.08    8.43
  -1   6  -5  914.40   64.10
  -1   7  -5 1618.00  112.60
  -1   8  -5 1476.00  102.80
  -1   9  -5 2865.00  198.70
  -1  10  -5  324.70   23.63
  -1  11  -5  891.90   62.57
  -1  12  -5   57.61    6.33
  -1  13  -5 1915.00  133.20
  -1  14  -5    1.48    4.33
  -1  15  -5 1151.00   80.70
  -1  23  -5   -0.70    3.42
  -1  24  -5   47.91    5.11
  -1  25  -5    0.02    3.49
  -1  26  -5   17.81    3.91
  -1  27  -5   37.68    4.63
  -1  28  -5  129.50   10.14
  -1  29  -5   31.47    4.38
  -1  30  -5   43.39    4.82
   1  29   6    7.92    3.26
   1  28   6    0.94    3.64
   1  27   6    8.44    3.93
  -1 -26  -6  288.50   20.86
   1  26   6  295.60   21.47
  -1 -25  -6   41.39    4.94
   1  25   6   41.56    5.17
  -1 -24  -6   15.76    3.70
   1  24   6   10.15    3.66
  -1 -23  -6   31.02    4.44
   1  23   6   18.40    3.78
  -1 -22  -6  247.90   18.29
   1  22   6  262.10   19.31
  -1 -21  -6   90.36    7.86
   1  21   6   90.41    8.00
  -1 -20  -6   18.96    3.67
   1  20   6   20.91    4.30
  -1 -19  -6  113.80    9.14
   1  19   6  101.50    8.61
  -1 -18  -6   62.57    6.29
   1  18   6   57.46    5.97
  -1 -17  -6   18.07    3.45
   1  17   6   15.92    4.10
  -1 -16  -6    0.68    3.23
   1  16   6    0.75    3.60
  -1 -15  -6  397.40   28.55
   1  15   6  410.80   29.50
  -1 -14  -6  972.80   68.15
   1  14   6  972.70   68.18
  -1 -13  -6   99.07    8.52
   1  13   6   89.15    7.99
  -1 -12  -6  688.30   48.50
   1  12   6  694.50   48.96
  -1 -11  -6  397.00   28.32
   1  11   6  391.70   28.10
  -1 -10  -6  758.60   53.24
   1  10   6  747.40   52.57
  -1  -9  -6   46.14    4.84
   1   9   6   34.59    4.69
  -1  -8  -6  809.40   56.79
   1   8   6  768.20   54.07
  -1  -7  -6  366.90   26.31
   1   7   6  363.80   26.27
  -1  -6  -6   77.65    6.93
   1   6   6   98.69    8.35
  -1  -5  -6 1841.00  128.00
   1   5   6 1386.00   96.60
  -1  -4  -6  236.10   17.32
   1   4   6  201.90   15.11
  -1  -3  -6  278.70   20.25
   1   3   6  242.60   17.87
  -1  -2  -6 1109.00   77.33
   1   2   6 1135.00   79.30
  -1  -1  -6  167.60   12.73
   1   1   6  173.10   13.36
  -1   0  -6   34.31    4.48
   1   0   6   64.12    6.57
  -1   1  -6  186.50   14.10
   1  -1   6  174.00   13.44
  -1   2  -6 1115.00   77.87
   1  -2   6 1110.00   77.58
  -1   3  -6  277.70   20.35
   1  -3   6  262.80   19.40
  -1   4  -6  214.60   16.15
   1  -4   6  225.20   16.90
  -1   5  -6 1645.00  114.50
  -1   6  -6  105.80    8.94
  -1   7  -6  378.70   27.29
  -1   8  -6  759.00   53.47
  -1   9  -6   45.68    5.62
  -1  10  -6  773.20   54.40
  -1  11  -6  362.00   26.21
  -1  12  -6  675.70   47.89
  -1  13  -6   73.90    7.53
  -1  14  -6  975.80   68.51
  -1  15  -6  406.50   29.47
  -1  16  -6    2.10    4.90
  -1  17  -6   22.87    5.62
  -1  18  -6   66.67    7.29
  -1  19  -6  107.60    9.79
  -1  20  -6   15.37    5.12
  -1  21  -6   79.94    8.06
  -1  22  -6  260.20   19.49
  -1  23  -6   23.20    5.40
  -1  25  -6   48.21    5.08
  -1  25  -6   45.59    6.32
  -1  26  -6  279.00   20.22
  -1  26  -6  309.30   22.69
  -1  27  -6   -2.98    3.47
  -1  27  -6    3.36    5.05
  -1  28  -6   -4.24    3.08
  -1  28  -6    2.39    5.17
  -1  29  -6    5.14    5.09
  -1  29  -6   -5.94    3.40
   1  28   7    1.16    3.88
  -1 -27  -7  184.00   13.63
   1  27   7  186.70   14.13
  -1 -26  -7  153.60   11.68
   1  26   7  173.10   13.21
  -1 -25  -7   56.13    5.48
   1  25   7   62.53    6.22
  -1 -24  -7  128.40   10.00
   1  24   7  133.50   10.61
  -1 -23  -7    2.10    3.12
   1  23   7    4.96    3.76
  -1 -22  -7   -1.38    3.19
   1  22   7   -0.57    3.71
  -1 -21  -7   36.15    4.59
   1  21   7   34.10    4.70
  -1 -20  -7   96.05    8.20
   1  20   7   82.76    7.57
  -1 -19  -7   10.13    3.50
   1  19   7   14.20    4.15
  -1 -18  -7    2.12    3.44
   1  18   7   -1.06    3.60
  -1 -17  -7  279.20   20.35
   1  17   7  329.30   23.98
  -1 -16  -7  471.70   33.57
   1  16   7  523.80   37.23
  -1 -15  -7  469.50   33.50
   1  15   7  486.90   34.71
  -1 -14  -7    1.91    3.35
   1  14   7    3.83    3.70
  -1 -13  -7  491.90   34.98
   1  13   7  512.60   36.49
  -1 -12  -7   33.52    4.81
   1  12   7   23.93    4.51
  -1 -11  -7 1264.00   88.27
   1  11   7 1172.00   81.87
  -1 -10  -7   10.52    3.57
   1  10   7   14.55    3.90
  -1  -9  -7  805.30   56.55
   1   9   7  889.20   62.44
  -1  -8  -7   92.65    8.03
   1   8   7   93.55    8.07
  -1  -7  -7   71.89    6.63
   1   7   7   71.92    6.87
  -1  -6  -7  495.90   35.20
   1   6   7  519.70   36.93
  -1  -5  -7  412.30   29.44
   1   5   7  449.10   32.07
  -1  -4  -7   20.23    3.81
   1   4   7   12.88    3.70
  -1  -3  -7  409.80   29.31
   1   3   7  358.00   25.95
  -1  -2  -7   15.56    3.68
   1   2   7   11.31    4.34
  -1  -1  -7  578.00   40.83
   1   1   7  539.20   38.32
  -1   0  -7    0.85    2.98
   1   0   7    0.76    4.05
  -1   1  -7  552.40   39.13
   1  -1   7  544.90   38.74
  -1   2  -7   13.92    3.64
   1  -2   7   16.66    4.44
  -1   3  -7  414.60   29.63
   1  -3   7  420.20   30.13
  -1   4  -7   15.15    3.71
   1  -4   7   30.66    5.04
  -1   5  -7  448.40   31.99
   1  -5   7  483.00   34.44
  -1   6  -7  533.30   37.97
  -1   7  -7   74.14    7.23
  -1   8  -7   97.24    8.44
  -1   9  -7  825.90   58.09
  -1  10  -7   19.39    4.69
  -1  11  -7 1154.00   80.73
  -1  12  -7   40.25    5.76
  -1  13  -7  494.90   35.47
  -1  14  -7  -10.59    4.77
  -1  15  -7  439.80   31.77
  -1  16  -7  457.70   32.90
  -1  17  -7  284.00   21.09
  -1  18  -7    4.49    4.93
  -1  19  -7    8.06    4.97
  -1  20  -7   87.07    8.35
  -1  21  -7   24.44    5.54
  -1  22  -7   -3.60    4.79
  -1  23  -7    3.88    5.21
  -1  24  -7  148.10   12.17
  -1  25  -7   56.33    6.81
  -1  26  -7  168.60   13.40
  -1  26  -7  175.80   13.27
  -1  27  -7  183.00   14.27
  -1  27  -7  177.60   13.22
  -1  28  -7   -2.89    4.93
  -1  28  -7    4.43    3.10
  -1 -27  -8   65.74    6.07
   1  27   8   30.67    4.54
  -1 -26  -8   -2.80    3.40
   1  26   8    6.21    3.69
  -1 -25  -8   17.57    3.73
   1  25   8   20.06    4.09
  -1 -24  -8    8.81    3.55
   1  24   8    4.74    3.62
  -1 -23  -8    5.75    3.38
   1  23   8    5.28    3.72
  -1 -22  -8  121.30    9.65
   1  22   8  125.70   10.09
  -1 -21  -8   35.59    4.46
   1  21   8   29.21    4.57
  -1 -20  -8    6.09    3.50
   1  20   8   13.28    3.72
  -1 -19  -8    9.87    3.63
   1  19   8    9.34    3.64
  -1 -18  -8  335.30   24.18
   1  18   8  336.00   24.42
  -1 -17  -8   59.31    6.09
   1  17   8   74.81    6.97
  -1 -16  -8  696.10   48.96
   1  16   8  705.80   49.71
  -1 -15  -8  475.70   33.80
   1  15   8  484.30   34.55
  -1 -14  -8  223.10   16.60
   1  14   8  232.00   17.21
  -1 -13  -8   90.53    7.95
   1  13   8   84.27    7.71
  -1 -12  -8 1095.00   76.52
   1  12   8 1091.00   76.36
  -1 -11  -8   78.01    7.06
   1  11   8   53.47    5.86
  -1 -10  -8  342.90   24.79
   1  10   8  329.40   23.94
  -1  -9  -8    9.37    3.52
   1   9   8   11.65    3.90
  -1  -8  -8  459.90   32.78
   1   8   8  513.10   36.54
  -1  -7  -8  489.30   34.87
   1   7   8  450.90   32.25
  -1  -6  -8 1587.00  110.50
   1   6   8 1776.00  123.60
  -1  -5  -8  690.20   48.70
   1   5   8  699.40   49.37
  -1  -4  -8 1108.00   77.47
   1   4   8 1003.00   70.27
  -1  -3  -8  242.60   18.07
   1   3   8  411.10   29.56
  -1  -2  -8  874.50   61.39
   1   2   8  866.80   60.87
  -1  -1  -8   -0.59    3.65
   1   1   8    4.61    3.95
  -1   0  -8  264.40   19.52
   1   0   8  262.20   19.36
  -1   1  -8    0.99    3.22
   1  -1   8   -1.73    3.61
  -1   2  -8  841.30   59.11
   1  -2   8  883.30   61.99
  -1   3  -8  387.30   27.90
   1  -3   8  344.80   25.05
  -1   4  -8 1108.00   77.49
   1  -4   8 1070.00   74.95
  -1   5  -8  703.10   49.57
   1  -5   8  721.50   50.96
  -1   6  -8 1756.00  122.20
  -1   7  -8  474.50   33.85
  -1   8  -8  477.00   34.10
  -1   9  -8   13.21    4.80
  -1  10  -8  334.20   24.47
  -1  11  -8   92.33    8.57
  -1  12  -8 1122.00   78.63
  -1  13  -8   92.48    8.97
  -1  14  -8  238.10   18.14
  -1  15  -8  505.90   36.24
  -1  16  -8  687.90   48.67
  -1  17  -8   58.96    6.74
  -1  18  -8  358.50   26.09
  -1  19  -8    7.07    5.04
  -1  20  -8   15.34    4.62
  -1  21  -8   41.64    6.34
  -1  22  -8  108.20    9.30
  -1  23  -8   10.97    4.93
  -1  24  -8   10.15    5.08
  -1  25  -8   12.32    4.98
  -1  26  -8    4.19    4.27
  -1  27  -8   60.29    6.53
  -1  27  -8   66.28    5.61
  -1 -26  -9   87.75    7.26
   1  26   9   94.44    8.07
  -1 -25  -9   30.12    4.09
   1  25   9   21.83    4.16
  -1 -24  -9   59.45    5.74
   1  24   9   61.94    6.10
  -1 -23  -9    4.78    3.27
   1  23   9    9.35    3.64
  -1 -22  -9   27.18    4.19
   1  22   9   31.01    4.61
  -1 -21  -9   54.45    5.28
   1  21   9   55.88    5.96
  -1 -20  -9   36.54    4.65
   1  20   9   43.28    5.08
  -1 -19  -9   18.08    3.74
   1  19   9    9.48    3.60
  -1 -18  -9  113.00    9.07
   1  18   9  117.00    9.61
  -1 -17  -9   10.26    3.48
   1  17   9    5.75    3.40
  -1 -16  -9   32.43    4.22
   1  16   9   28.21    4.39
  -1 -15  -9   37.01    4.81
   1  15   9   28.29    4.60
  -1 -14  -9  188.80   14.35
   1  14   9  194.50   14.76
  -1 -13  -9   26.46    4.13
   1  13   9   19.10    4.52
  -1 -12  -9  340.80   24.57
   1  12   9  325.30   23.57
  -1 -11  -9  150.10   11.69
   1  11   9  159.60   12.36
  -1 -10  -9   36.23    4.68
   1  10   9   37.79    4.97
  -1  -9  -9  103.20    8.60
   1   9   9  118.30    9.75
  -1  -8  -9  261.90   19.22
   1   8   9  263.80   19.39
  -1  -7  -9  123.80    9.94
   1   7   9  133.10   10.60
  -1  -6  -9 1262.00   88.03
   1   6   9 1221.00   85.25
  -1  -5  -9    2.62    3.34
   1   5   9   -0.68    3.53
  -1  -4  -9  311.80   22.66
   1   4   9  327.00   23.88
  -1  -3  -9   70.07    6.59
   1   3   9   74.55    7.29
  -1  -2  -9  198.00   15.01
   1   2   9  215.40   16.25
  -1  -1  -9  120.60    9.88
   1   1   9  130.20   10.73
  -1   0  -9   -3.31    3.32
   1   0   9   -2.15    4.59
  -1   1  -9  130.80   10.54
   1  -1   9  136.40   11.22
  -1   2  -9  216.50   16.25
   1  -2   9  223.40   16.91
  -1   3  -9   61.31    6.07
   1  -3   9   92.04    8.32
  -1   4  -9  320.60   23.30
   1  -4   9  287.40   21.16
  -1   5  -9    0.71    3.17
   1  -5   9    3.88    3.90
  -1   6  -9 1247.00   87.14
  -1   7  -9  134.70   10.72
  -1   8  -9  259.50   19.11
  -1   9  -9   98.84    8.48
  -1  10  -9   55.22    6.77
  -1  11  -9  160.10   12.88
  -1  12  -9  279.00   20.79
  -1  13  -9   23.21    5.29
  -1  14  -9  182.40   14.24
  -1  15  -9   31.94    5.16
  -1  16  -9   32.28    5.54
  -1  17  -9    9.27    4.85
  -1  18  -9  134.50   11.23
  -1  19  -9   13.51    5.03
  -1  20  -9   44.53    6.20
  -1  21  -9   56.19    6.57
  -1  22  -9   30.12    5.79
  -1  23  -9    7.62    4.53
  -1  24  -9   51.14    6.62
  -1  25  -9   22.63    5.60
  -1  26  -9   85.43    8.28
  -1 -24 -10  148.70   11.27
   1  24  10  141.30   11.05
  -1 -23 -10    9.41    3.02
   1  23  10   15.24    3.81
  -1 -22 -10  153.90   11.77
   1  22  10  155.10   12.00
  -1 -21 -10   24.43    4.17
   1  21  10   24.35    4.17
  -1 -20 -10  361.90   25.93
   1  20  10  387.40   27.73
  -1 -19 -10  149.70   11.46
   1  19  10  132.30   10.66
  -1 -18 -10   42.55    5.06
   1  18  10   52.72    5.82
  -1 -17 -10  209.90   15.60
   1  17  10  233.20   17.36
  -1 -16 -10    0.70    3.22
   1  16  10   -2.12    3.63
  -1 -15 -10  120.50    9.63
   1  15  10  125.90   10.11
  -1 -14 -10   56.00    5.71
   1  14  10   46.48    5.34
  -1 -13 -10  557.60   39.51
   1  13  10  513.40   36.46
  -1 -12 -10   54.51    5.69
   1  12  10   45.79    5.45
  -1 -11 -10   34.32    4.55
   1  11  10   23.27    4.13
  -1 -10 -10    5.03    2.87
   1  10  10    1.82    3.42
  -1  -9 -10  297.50   21.57
   1   9  10  287.60   20.98
  -1  -8 -10   85.77    7.54
   1   8  10   94.12    8.17
  -1  -7 -10  208.60   15.73
   1   7  10  227.20   17.09
  -1  -6 -10  534.50   37.98
   1   6  10  552.30   39.16
  -1  -5 -10  176.90   13.59
   1   5  10  140.20   11.17
  -1  -4 -10  156.10   12.19
   1   4  10  161.20   12.66
  -1  -3 -10    3.82    3.48
   1   3  10    9.88    4.05
  -1  -2 -10  458.70   32.81
   1   2  10  450.80   32.33
  -1  -1 -10  171.20   13.22
   1   1  10  178.20   13.83
  -1   0 -10 1361.00   94.92
   1   0  10 1403.00   97.93
  -1   1 -10  170.70   13.13
   1  -1  10  164.70   12.87
  -1   2 -10  429.20   30.77
   1  -2  10  412.50   29.67
  -1   3 -10    6.47    3.58
   1  -3  10   16.35    4.28
  -1   4 -10  130.30   10.57
   1  -4  10  142.90   11.31
  -1   5 -10  173.80   13.22
   1  -5  10  196.20   14.79
  -1   6 -10  493.60   35.07
  -1   7 -10  211.30   15.71
  -1   8 -10   76.54    6.76
  -1   9 -10  302.90   22.08
  -1  10 -10   -3.13    3.40
  -1  11 -10   31.03    4.61
  -1  12 -10   53.50    6.09
  -1  13 -10  553.10   39.36
  -1  14 -10   61.53    6.80
  -1  15 -10  116.70   10.11
  -1  16 -10   -4.60    4.72
  -1  17 -10  243.50   18.26
  -1  18 -10   42.00    5.95
  -1  19 -10  187.00   14.51
  -1  20 -10  382.10   27.64
  -1  21 -10   21.17    5.10
  -1  22 -10  170.50   13.39
  -1  23 -10   14.50    5.00
  -1  24 -10  154.50   12.59
  -1 -22 -11  128.40    9.99
   1  22  11  126.80   10.07
  -1 -21 -11   69.70    6.49
   1  21  11   70.53    6.79
  -1 -20 -11  200.50   14.75
   1  20  11  184.50   13.85
  -1 -19 -11  261.50   18.99
   1  19  11  233.90   17.10
  -1 -18 -11   -1.19    3.38
   1  18  11   -3.65    3.50
  -1 -17 -11  120.80    9.60
   1  17  11  115.10    9.35
  -1 -16 -11   27.65    4.04
   1  16  11   24.84    4.15
  -1 -15 -11   39.84    4.95
   1  15  11   37.33    4.89
  -1 -14 -11   17.86    3.63
   1  14  11    9.86    3.90
  -1 -13 -11  244.00   18.03
   1  13  11  240.60   17.74
  -1 -12 -11    5.77    2.90
   1  12  11    2.97    3.60
  -1 -11 -11   -2.98    3.19
   1  11  11    2.22    3.32
  -1 -10 -11  144.10   11.14
   1  10  11  144.70   11.45
  -1  -9 -11  100.80    8.31
   1   9  11  105.20    9.11
  -1  -8 -11    1.95    3.26
   1   8  11    2.82    3.77
  -1  -7 -11    6.88    3.33
   1   7  11    4.64    3.85
  -1  -6 -11   79.68    7.22
   1   6  11   82.86    7.53
  -1  -5 -11  808.60   56.78
   1   5  11  885.60   62.11
  -1  -4 -11   13.96    3.73
   1   4  11   25.33    4.35
  -1  -3 -11  529.00   37.58
   1   3  11  488.40   34.79
  -1  -2 -11  140.70   11.05
   1   2  11  136.80   10.87
  -1  -1 -11  520.70   37.01
   1   1  11  543.50   38.53
  -1   0 -11    1.80    3.19
   1   0  11    7.68    3.67
  -1   1 -11  503.10   35.82
   1  -1  11  486.90   34.71
  -1   2 -11  125.70   10.10
   1  -2  11  170.70   13.21
  -1   3 -11  508.30   36.11
   1  -3  11  484.00   34.54
  -1   4 -11   11.92    3.69
   1  -4  11   16.93    4.25
  -1   5 -11  971.50   68.03
  -1   6 -11   72.61    6.82
  -1   7 -11    7.11    3.56
  -1   8 -11    3.03    3.47
  -1   9 -11   85.17    7.44
  -1  10 -11  144.90   11.36
  -1  11 -11    5.97    3.60
  -1  12 -11   -0.63    3.36
  -1  13 -11  231.60   17.14
  -1  14 -11   10.68    3.63
  -1  15 -11   42.11    5.88
  -1  16 -11   27.82    5.26
  -1  17 -11  120.10   10.25
  -1  18 -11    8.77    4.61
  -1  19 -11  299.00   21.87
  -1  20 -11  177.10   13.72
  -1  21 -11   68.84    7.08
  -1  22 -11  115.50    9.93
  -1 -19 -12  118.90    9.30
   1  19  12  124.80    9.94
  -1 -18 -12   75.89    6.52
   1  18  12   72.46    6.67
  -1 -17 -12   73.69    6.63
   1  17  12   88.61    7.69
  -1 -16 -12    8.24    3.54
   1  16  12    8.28    3.63
  -1 -15 -12   43.91    4.60
   1  15  12   35.65    4.74
  -1 -14 -12  223.70   16.50
   1  14  12  222.80   16.53
  -1 -13 -12   93.33    7.93
   1  13  12   94.75    8.04
  -1 -12 -12  353.90   25.36
   1  12  12  345.90   24.93
  -1 -11 -12    5.42    3.19
   1  11  12    2.13    3.83
  -1 -10 -12   28.72    3.93
   1  10  12   25.19    4.55
  -1  -9 -12  138.40   10.74
   1   9  12   68.00    6.77
  -1  -8 -12   26.93    4.06
   1   8  12   33.51    4.85
  -1  -7 -12  564.20   39.92
   1   7  12  596.40   42.17
  -1  -6 -12   24.20    4.11
   1   6  12    9.17    3.79
  -1  -5 -12  140.50   10.85
   1   5  12  142.40   11.32
  -1  -4 -12    1.06    3.34
   1   4  12   -0.76    3.70
  -1  -3 -12   43.82    5.06
   1   3  12   51.49    5.61
  -1  -2 -12   10.73    3.44
   1   2  12    9.18    3.85
  -1  -1 -12  123.50    9.91
   1   1  12  122.70   10.10
  -1   0 -12   56.03    5.74
   1   0  12   41.57    5.12
  -1   1 -12  120.70    9.69
   1  -1  12  114.80    9.42
  -1   2 -12   10.49    3.65
   1  -2  12    1.09    3.61
  -1   3 -12   56.00    5.89
   1  -3  12   50.47    5.69
  -1   4 -12    3.72    3.40
   1  -4  12    6.64    3.49
  -1   5 -12  147.80   11.57
  -1   6 -12   15.35    3.85
  -1   7 -12  595.30   42.14
  -1   8 -12   36.28    4.46
  -1   9 -12  196.80   14.88
  -1  10 -12   27.46    4.03
  -1  11 -12   -0.11    3.53
  -1  12 -12  348.60   25.07
  -1  13 -12  104.40    8.59
  -1  14 -12  247.80   18.19
  -1  15 -12   51.80    5.41
  -1  16 -12    4.75    3.60
  -1  17 -12   77.67    7.12
  -1  18 -12   73.12    6.64
  -1  19 -12  112.80    9.28
  -1 -16 -13   15.71    3.47
   1  16  13   14.80    3.90
  -1 -15 -13    8.69    2.93
   1  15  13   11.10    3.85
  -1 -14 -13   51.87    5.27
   1  14  13   51.47    5.88
  -1 -13 -13   27.74    4.27
   1  13  13   37.91    5.03
  -1 -12 -13   10.34    3.38
   1  12  13   -0.10    3.65
  -1 -11 -13   -9.22    3.33
   1  11  13    1.58    3.70
  -1 -10 -13  274.10   19.91
   1  10  13  280.80   20.49
  -1  -9 -13   87.15    7.37
   1   9  13   98.58    8.43
  -1  -8 -13  417.20   29.67
   1   8  13  399.40   28.56
  -1  -7 -13  194.40   14.44
   1   7  13  223.30   16.60
  -1  -6 -13  266.50   19.42
   1   6  13  243.10   18.01
  -1  -5 -13   59.13    5.90
   1   5  13   63.31    6.37
  -1  -4 -13   84.52    7.45
   1   4  13   94.86    8.34
  -1  -3 -13  174.70   13.26
   1   3  13  196.70   14.91
  -1  -2 -13  202.90   15.16
   1   2  13  203.80   15.32
  -1  -1 -13   87.00    7.57
   1   1  13   63.53    6.30
  -1   0 -13   -1.25    3.26
   1   0  13   -2.67    3.54
  -1   1 -13   86.73    7.55
   1  -1  13   82.80    7.50
  -1   2 -13  229.90   17.00
   1  -2  13  202.00   15.22
  -1   3 -13  182.40   13.73
   1  -3  13  172.50   13.26
  -1   4 -13   93.90    7.86
  -1   5 -13   59.64    5.94
  -1   6 -13  256.90   18.74
  -1   7 -13  209.20   15.56
  -1   8 -13  414.30   29.52
  -1   9 -13   81.96    7.27
  -1  10 -13  287.00   20.81
  -1  11 -13   -0.72    3.25
  -1  12 -13    9.32    3.51
  -1  13 -13   28.69    4.39
  -1  14 -13   64.15    6.15
  -1  15 -13    7.20    3.38
  -1  16 -13   24.95    3.81
  -1 -12 -14   77.82    6.81
   1  12  14   75.61    7.23
  -1 -11 -14   49.07    5.14
   1  11  14   35.16    4.81
  -1 -10 -14    4.92    3.55
   1  10  14    7.09    3.87
  -1  -9 -14   17.35    3.68
   1   9  14   15.85    4.00
  -1  -8 -14  209.20   15.52
   1   8  14  186.00   13.97
  -1  -7 -14   54.44    5.39
   1   7  14   54.96    5.83
  -1  -6 -14  148.00   11.23
   1   6  14  156.90   12.14
  -1  -5 -14   45.28    4.97
   1   5  14   34.71    4.86
  -1  -4 -14   10.70    3.64
   1   4  14   -7.49    3.60
  -1  -3 -14   14.26    3.82
   1   3  14   18.83    4.03
  -1  -2 -14  107.10    8.77
   1   2  14  128.90   10.35
  -1  -1 -14   21.86    4.00
   1   1  14   15.55    4.19
  -1   0 -14   41.62    4.84
   1   0  14   43.34    5.41
  -1   1 -14   23.22    4.02
   1  -1  14   22.93    4.39
  -1   2 -14  111.60    9.04
   1  -2  14  124.90   10.12
  -1   3 -14    8.47    3.15
  -1   4 -14    3.38    3.38
  -1   5 -14   42.39    4.87
  -1   6 -14  137.30   10.63
  -1   7 -14   52.07    5.20
  -1   8 -14  183.30   13.66
  -1   9 -14   17.20    3.42
  -1  10 -14    0.60    3.08
  -1  11 -14   40.36    4.70
  -1  12 -14   77.55    6.71
  -1  -5 -15    3.56    3.58
   1   5  15    8.63    4.03
  -1  -4 -15    6.46    3.35
   1   4  15    9.09    3.90
  -1  -3 -15   -2.58    3.39
   1   3  15    6.24    4.04
  -1  -2 -15   64.67    6.11
   1   2  15   51.93    6.02
  -1  -1 -15   10.94    3.47
   1   1  15    3.95    3.83
  -1   0 -15    2.11    3.32
   1   0  15    1.91    3.79
  -1   1 -15   12.12    3.63
   1  -1  15   12.53    3.85
  -1   2 -15   52.45    5.25
  -1   3 -15    0.92    3.31
  -1   4 -15   10.78    3.40
   2   5 -16   39.04    4.68
  -2  -4  16  111.50    8.64
   2   4 -16   93.90    7.89
  -2  -3  16    3.50    3.33
   2   3 -16   10.11    3.61
  -2  -2  16   56.16    5.49
   2   2 -16   64.60    5.97
  -2  -1  16   12.50    3.85
   2   1 -16   19.77    3.34
  -2   0  16  301.00   21.70
   2   0 -16  307.10   22.07
  -2   1  16   20.23    4.18
   2  -1 -16   22.76    4.08
  -2   2  16   62.95    6.24
   2  -2 -16   62.24    5.60
  -2   3  16    6.01    3.75
   2  -3 -16   10.21    2.84
  -2   4  16   83.54    7.44
   2  -4 -16  104.30    8.48
  -2   5  16   45.06    4.87
   2  -5 -16   23.24    4.04
  -2   6  16  145.20   11.10
   2  12 -15   10.74    3.25
   2  11 -15   45.37    4.99
   2  10 -15   30.92    4.45
   2   9 -15    8.59    2.92
   2   8 -15  243.60   17.80
   2   7 -15    4.87    3.19
   2   6 -15    9.68    3.53
  -2  -5  15   15.80    4.13
   2   5 -15   13.86    3.26
  -2  -4  15   81.33    7.52
   2   4 -15   79.06    7.00
  -2  -3  15   -3.08    3.87
   2   3 -15    2.09    3.35
  -2  -2  15   76.72    7.17
   2   2 -15   67.66    6.34
  -2  -1  15   79.89    7.34
   2   1 -15   72.89    6.54
  -2   0  15   -1.10    3.89
   2   0 -15    4.42    3.45
  -2   1  15   73.65    6.88
   2  -1 -15   84.97    7.47
  -2   2  15   81.18    7.24
   2  -2 -15   77.03    7.13
  -2   3  15    8.21    3.83
   2  -3 -15    7.10    3.52
  -2   4  15   75.92    6.89
   2  -4 -15   80.57    7.09
  -2   5  15   15.43    3.92
   2  -5 -15   13.40    3.52
  -2   6  15    7.79    3.98
   2  -6 -15    7.39    3.25
  -2   7  15    0.96    3.52
   2  -7 -15    4.70    3.15
  -2   8  15  267.70   19.41
   2  -8 -15  269.50   19.54
  -2   9  15   19.21    3.99
   2  -9 -15   12.73    3.56
  -2  10  15   36.03    4.83
   2 -10 -15   22.33    3.87
  -2  11  15   39.02    4.75
   2 -11 -15   41.83    4.51
  -2  12  15    7.96    3.59
   2 -12 -15   10.74    3.18
   2  16 -14   63.10    6.02
   2  15 -14   91.50    7.69
   2  14 -14   51.19    5.48
   2  13 -14   21.68    4.00
   2  12 -14   12.76    3.45
   2  11 -14   22.50    3.87
   2  10 -14   56.04    5.78
   2   9 -14   47.78    5.15
   2   8 -14   13.20    3.87
   2   7 -14   14.30    3.60
   2   6 -14   34.24    4.65
  -2  -5  14   -3.41    3.48
   2   5 -14    2.60    3.33
  -2  -4  14  277.70   20.20
   2   4 -14  283.70   20.53
  -2  -3  14  102.90    8.63
   2   3 -14   81.53    7.05
  -2  -2  14  788.30   55.32
   2   2 -14  801.20   56.20
  -2  -1  14   27.74    4.81
   2   1 -14   31.98    4.48
  -2   0  14  231.20   17.20
   2   0 -14  239.00   17.59
  -2   1  14   34.32    4.88
   2  -1 -14   31.50    4.48
  -2   2  14  802.70   56.36
   2  -2 -14  729.40   51.25
  -2   3  14   91.41    8.10
   2  -3 -14   95.33    8.12
  -2   4  14  262.40   19.17
   2  -4 -14  296.90   21.55
  -2   5  14    7.29    3.47
   2  -5 -14   -3.95    2.79
  -2   6  14   41.61    5.00
   2  -6 -14   36.12    4.45
  -2   7  14   14.84    4.00
   2  -7 -14   16.27    3.51
  -2   8  14   20.99    4.38
   2  -8 -14   15.34    3.71
  -2   9  14   47.47    5.33
   2  -9 -14   41.12    4.80
  -2  10  14   47.11    5.19
   2 -10 -14   58.42    5.91
  -2  11  14   18.49    3.44
   2 -11 -14   11.90    3.52
  -2  12  14    1.64    3.68
   2 -12 -14   13.65    3.35
  -2  13  14   16.10    3.96
   2 -13 -14   14.81    3.06
  -2  14  14   44.42    5.41
   2 -14 -14   34.88    3.82
  -2  15  14   91.01    7.70
   2 -15 -14   87.14    7.28
  -2  16  14   60.45    5.86
   2 -16 -14   57.47    5.32
  -2  17  14   93.10    8.09
   2  19 -13    8.34    3.37
   2  18 -13   43.63    5.11
   2  17 -13  122.70    9.63
   2  16 -13    1.34    2.79
   2  15 -13    0.39    2.69
   2  14 -13   -2.67    3.06
   2  13 -13    2.55    3.42
   2  12 -13  151.50   11.77
   2  11 -13   26.40    3.89
   2  10 -13   58.27    5.95
   2   9 -13   -1.77    2.87
   2   8 -13   12.58    3.70
   2   7 -13  155.00   12.00
  -2  -6  13    0.51    3.90
   2   6 -13    7.67    3.00
  -2  -5  13  200.10   15.24
   2   5 -13  202.10   15.14
  -2  -4  13   55.85    6.29
   2   4 -13   68.47    6.55
  -2  -3  13 1381.00   96.35
   2   3 -13 1359.00   94.70
  -2  -2  13  115.20    9.78
   2   2 -13  100.20    8.48
  -2  -1  13  742.60   52.29
   2   1 -13  768.20   53.99
  -2   0  13   -0.94    3.61
   2   0 -13   -2.33    3.28
  -2   1  13  734.10   51.63
   2  -1 -13  772.60   54.27
  -2   2  13  111.70    9.18
   2  -2 -13  107.90    8.88
  -2   3  13 1446.00  100.70
   2  -3 -13 1398.00   97.46
  -2   4  13   49.19    5.49
   2  -4 -13   56.53    5.89
  -2   5  13  201.80   15.24
   2  -5 -13  185.30   13.97
  -2   6  13   -4.81    3.78
   2  -6 -13    4.54    3.10
  -2   7  13  158.50   12.40
   2  -7 -13  161.10   12.44
  -2   8  13   17.56    3.45
   2  -8 -13   26.79    4.35
  -2   9  13   -0.36    3.57
   2  -9 -13    2.63    2.91
  -2  10  13   62.67    5.86
   2 -10 -13   51.18    5.18
  -2  11  13   27.54    4.41
   2 -11 -13   28.79    4.20
  -2  12  13  127.90   10.20
   2 -12 -13  151.40   11.73
  -2  13  13    4.54    3.68
   2 -13 -13   -2.03    3.17
  -2  14  13   -2.04    3.42
   2 -14 -13    2.40    2.45
  -2  15  13    8.78    3.78
   2 -15 -13    9.94    3.24
  -2  16  13   -1.21    3.43
   2 -16 -13    5.16    3.39
  -2  17  13  136.10   10.76
   2 -17 -13  154.80   11.80
  -2  18  13   40.15    4.84
   2 -18 -13   28.43    4.10
  -2  19  13   15.30    4.01
   2 -19 -13   10.10    3.11
  -2  20  13   62.12    5.79
   2 -20 -13   58.95    5.95
   2  22 -12    1.38    4.52
   2  21 -12   34.07    5.63
   2  20 -12   15.97    4.76
   2  19 -12  205.60   15.74
   2  18 -12   -0.31    3.42
   2  17 -12   78.64    7.07
   2  16 -12   46.56    5.25
   2  15 -12   62.56    6.17
   2  14 -12   72.18    6.80
   2  13 -12   64.71    6.13
   2  12 -12   68.49    6.30
   2  11 -12    9.25    3.56
   2  10 -12  511.60   36.31
   2   9 -12  132.90   10.54
   2   8 -12    0.20    3.41
   2   7 -12  224.60   16.70
  -2  -6  12   70.91    6.66
   2   6 -12  103.40    8.59
  -2  -5  12  169.10   12.94
   2   5 -12  172.60   13.29
  -2  -4  12   71.57    6.73
   2   4 -12  105.50    8.84
  -2  -3  12  662.90   46.72
   2   3 -12  697.20   49.20
  -2  -2  12    5.72    3.55
   2   2 -12   10.11    3.74
  -2  -1  12   12.02    4.00
   2   1 -12   25.33    4.27
  -2   0  12   69.48    6.99
   2   0 -12   78.39    7.21
  -2   1  12   11.46    4.11
   2  -1 -12   11.16    3.68
  -2   2  12    3.93    4.11
   2  -2 -12    4.22    3.51
  -2   3  12  657.30   46.50
   2  -3 -12  667.00   47.01
  -2   4  12  121.60   10.13
   2  -4 -12  137.50   11.09
  -2   5  12  181.60   13.95
   2  -5 -12  185.40   13.97
  -2   6  12   59.65    6.16
   2  -6 -12   80.80    7.35
  -2   7  12  212.30   15.90
   2  -7 -12  215.70   16.10
  -2   8  12   -1.02    3.64
   2  -8 -12    3.68    3.09
  -2   9  12  162.90   12.64
   2  -9 -12  150.50   11.74
  -2  10  12  518.50   36.89
   2 -10 -12  539.90   38.16
  -2  11  12    5.22    3.90
   2 -11 -12    9.41    3.60
  -2  12  12   75.34    6.93
   2 -12 -12   65.36    6.28
  -2  13  12   43.75    5.02
   2 -13 -12   46.02    4.69
  -2  14  12   83.58    7.50
   2 -14 -12   76.45    6.86
  -2  15  12   82.38    7.52
   2 -15 -12   67.61    6.44
  -2  16  12   53.99    5.81
   2 -16 -12   72.34    6.66
  -2  17  12   89.13    7.82
   2 -17 -12   80.34    6.71
  -2  18  12   -0.23    3.78
   2 -18 -12    3.23    2.95
  -2  19  12  151.80   11.74
   2 -19 -12  161.80   12.28
  -2  20  12   21.32    4.20
   2 -20 -12   11.86    3.50
  -2  21  12   39.00    4.81
   2 -21 -12   40.71    4.61
  -2  22  12    2.54    3.70
   2 -22 -12    5.64    3.46
   2  24 -11   63.06    6.88
   2  23 -11   -7.52    4.53
   2  22 -11   12.66    4.91
   2  21 -11   -5.92    4.82
   2  20 -11   85.87    8.16
   2  19 -11  183.10   14.23
   2  18 -11    8.86    4.61
   2  17 -11    3.35    4.39
   2  16 -11  145.20   11.76
   2  15 -11  220.30   16.88
   2  14 -11  148.50   11.63
   2  13 -11   78.86    7.00
   2  12 -11    7.70    3.66
   2  11 -11    0.58    3.38
   2  10 -11   85.58    7.61
   2   9 -11  251.30   18.58
   2   8 -11  101.20    8.57
  -2  -7  11  603.70   42.76
   2   7 -11  569.80   40.35
  -2  -6  11  354.50   25.67
   2   6 -11  366.70   26.44
  -2  -5  11 1220.00   85.12
   2   5 -11 1230.00   85.92
  -2  -4  11  385.60   27.67
   2   4 -11  391.20   28.12
  -2  -3  11   59.21    6.08
   2   3 -11   60.35    5.75
  -2  -2  11   32.11    4.56
   2   2 -11   21.78    4.15
  -2  -1  11  891.60   62.54
   2   1 -11  912.40   64.03
  -2   0  11   -4.84    3.83
   2   0 -11    1.53    3.43
  -2   1  11  924.60   64.89
   2  -1 -11  859.10   60.36
  -2   2  11   31.62    4.80
   2  -2 -11   27.20    4.42
  -2   3  11   69.74    6.98
   2  -3 -11   74.57    6.99
  -2   4  11  426.90   30.65
   2  -4 -11  391.60   28.18
  -2   5  11 1329.00   92.76
   2  -5 -11 1289.00   89.94
  -2   6  11  384.50   27.67
   2  -6 -11  352.40   25.37
  -2   7  11  613.10   43.39
   2  -7 -11  711.60   50.14
  -2   8  11  108.60    9.01
   2  -8 -11  123.50    9.88
  -2   9  11  376.30   27.05
   2  -9 -11  336.70   24.35
  -2  10  11   75.90    7.02
   2 -10 -11   62.84    5.98
  -2  11  11    4.71    3.63
   2 -11 -11    6.96    3.31
  -2  12  11    3.60    3.27
   2 -12 -11    0.87    2.99
  -2  13  11   76.16    7.35
   2 -13 -11   94.78    8.23
  -2  14  11  176.60   13.63
   2 -14 -11  143.00   10.94
  -2  15  11  179.20   13.65
   2 -15 -11  169.40   13.00
  -2  16  11  172.60   13.18
   2 -16 -11  160.20   12.34
  -2  17  11    6.49    3.48
   2 -17 -11    1.25    2.83
  -2  18  11   18.97    3.84
   2 -18 -11   28.81    4.12
  -2  19  11  168.00   12.80
   2 -19 -11  162.80   12.44
  -2  20  11   94.17    8.25
   2 -20 -11   86.05    7.42
  -2  21  11   -0.93    3.48
   2 -21 -11    3.33    3.38
  -2  22  11   26.24    4.38
   2 -22 -11   17.92    3.73
  -2  23  11   -0.66    3.48
   2 -23 -11    1.01    3.19
  -2  24  11   60.76    6.07
   2 -24 -11   69.23    6.32
   2  26 -10   -0.59    5.16
   2  25 -10   49.58    6.42
   2  24 -10    6.77    4.98
   2  23 -10  132.30   11.29
   2  22 -10   22.57    5.52
   2  21 -10   81.59    7.93
   2  20 -10   25.14    5.05
   2  19 -10   51.47    6.41
   2  18 -10  243.80   18.38
   2  17 -10  210.20   16.07
   2  16 -10  188.60   14.69
   2  15 -10  567.20   40.36
   2  14 -10  166.10   13.28
   2  13 -10  210.80   16.10
   2  12 -10   70.09    7.16
   2  11 -10   15.69    3.96
   2  10 -10 1261.00   88.08
   2   9 -10  102.50    8.53
   2   8 -10  302.10   21.92
  -2  -7  10   41.72    5.40
   2   7 -10   30.44    4.36
  -2  -6  10   89.46    8.09
   2   6 -10   85.88    7.61
  -2  -5  10  129.60   10.64
   2   5 -10  114.90    9.57
  -2  -4  10   23.82    4.40
   2   4 -10   15.33    3.77
  -2  -3  10  163.70   12.74
   2   3 -10  162.80   12.70
  -2  -2  10   31.38    4.84
   2   2 -10   31.18    4.43
  -2  -1  10   69.35    6.64
   2   1 -10   70.72    6.55
  -2   0  10   12.21    3.74
   2   0 -10   12.01    3.73
  -2   1  10   89.11    7.68
   2  -1 -10   69.75    6.72
  -2   2  10   33.03    4.72
   2  -2 -10   27.89    4.38
  -2   3  10  159.90   12.52
   2  -3 -10  163.60   12.67
  -2   4  10   20.66    4.08
   2  -4 -10   19.44    4.10
  -2   5  10  115.20    9.68
   2  -5 -10  116.30    9.46
  -2   6  10   70.02    6.78
   2  -6 -10   68.46    6.68
  -2   7  10   47.01    5.47
   2  -7 -10   39.77    5.05
  -2   8  10  334.30   24.24
   2  -8 -10  337.80   24.54
  -2   9  10  116.90    9.61
   2  -9 -10  106.70    8.80
  -2  10  10 1157.00   80.79
   2 -10 -10 1249.00   87.22
  -2  11  10   20.16    4.10
   2 -11 -10   22.41    4.11
  -2  12  10   60.13    6.10
   2 -12 -10   88.95    7.63
  -2  13  10  183.60   14.06
   2 -13 -10  192.60   14.67
  -2  14  10  165.60   12.77
   2 -14 -10  172.20   13.17
  -2  15  10  584.50   41.43
   2 -15 -10  598.00   42.31
  -2  16  10  163.00   12.80
   2 -16 -10  167.70   12.80
  -2  17  10  201.60   15.31
   2 -17 -10  203.50   15.15
  -2  18  10  244.00   18.00
   2 -18 -10  222.70   16.60
  -2  19  10   62.67    6.34
   2 -19 -10   68.74    6.48
  -2  20  10   31.38    4.55
   2 -20 -10   37.56    4.52
  -2  21  10   81.82    7.25
   2 -21 -10   77.44    6.56
  -2  22  10   17.84    4.22
   2 -22 -10   22.25    3.45
  -2  23  10   97.28    8.15
   2 -23 -10  106.50    8.49
  -2  24  10   10.15    3.64
   2 -24 -10   13.74    3.20
  -2  25  10   73.21    6.83
   2 -25 -10   61.35    5.52
  -2  26  10   -1.56    3.60
   2 -26 -10   -1.18    2.74
   2  27  -9   42.66    6.35
   2  26  -9   17.66    5.06
   2  25  -9   -1.57    5.00
   2  24  -9   21.14    5.68
   2  23  -9    3.20    4.32
   2  22  -9    3.72    4.80
   2  21  -9    4.36    4.40
   2  20  -9  175.30   13.92
   2  19  -9   43.92    6.06
   2  18  -9    6.88    5.02
   2  17  -9  690.50   48.79
   2  16  -9  293.90   21.74
   2  15  -9  160.10   12.84
   2  14  -9   50.53    6.40
   2  13  -9  312.80   23.05
   2  12  -9   18.14    4.96
   2  11  -9  571.70   40.65
   2  10  -9   -1.92    3.97
   2   9  -9  382.70   27.50
   2   8  -9   12.79    3.67
  -2  -7   9   12.05    4.81
   2   7  -9   18.15    4.35
  -2  -6   9   45.86    6.15
   2   6  -9   38.08    4.75
  -2  -5   9  390.10   28.29
   2   5  -9  413.00   29.69
  -2  -4   9 1194.00   83.55
   2   4  -9 1200.00   83.86
  -2  -3   9  138.60   11.15
   2   3  -9  136.80   10.97
  -2  -2   9    3.56    4.11
   2   2  -9    0.12    3.45
  -2  -1   9 1087.00   76.04
   2   1  -9 1094.00   76.52
  -2   0   9   -2.61    3.85
   2   0  -9    0.02    3.31
  -2   1   9 1185.00   82.76
   2  -1  -9 1110.00   77.66
  -2   2   9    5.94    4.07
   2  -2  -9   -2.87    3.69
  -2   3   9  119.40    9.89
   2  -3  -9  134.90   10.94
  -2   4   9 1152.00   80.60
   2  -4  -9  999.20   69.98
  -2   5   9  393.50   28.31
   2  -5  -9  404.40   28.98
  -2   6   9   37.92    5.21
   2  -6  -9   40.27    4.71
  -2   7   9   14.91    3.71
   2  -7  -9    6.25    3.24
  -2   8   9   30.05    5.07
   2  -8  -9   15.98    3.59
  -2   9   9  388.10   28.09
   2  -9  -9  337.10   24.31
  -2  10   9    1.70    3.94
   2 -10  -9    5.43    3.05
  -2  11   9  611.90   43.39
   2 -11  -9  550.50   39.06
  -2  12   9   16.49    3.88
   2 -12  -9   10.59    3.81
  -2  13   9  295.00   21.62
   2 -13  -9  312.60   22.73
  -2  14   9   37.43    4.80
   2 -14  -9   43.70    5.16
  -2  15   9  141.20   11.30
   2 -15  -9  182.70   13.86
  -2  16   9  269.70   19.92
   2 -16  -9  269.50   19.83
  -2  17   9  750.60   52.89
   2 -17  -9  651.90   45.95
  -2  18   9    9.84    4.05
   2 -18  -9    4.12    3.48
  -2  19   9   34.30    4.49
   2 -19  -9   39.10    4.81
  -2  20   9  109.80    9.04
   2 -20  -9  145.40   11.31
  -2  21   9   10.42    3.93
   2 -21  -9   10.93    3.18
  -2  22   9    4.07    3.48
   2 -22  -9   -2.44    2.45
  -2  23   9    1.20    3.52
   2 -23  -9    1.89    3.12
  -2  24   9    8.45    3.99
   2 -24  -9   16.34    3.27
  -2  25   9    0.83    3.28
   2 -25  -9    1.46    2.98
  -2  26   9   17.69    3.94
   2 -26  -9   31.69    3.92
  -2  27   9   48.59    5.41
   2 -27  -9   45.73    4.82
   2  28  -8   -1.46    3.12
   2  28  -8   -0.14    4.22
   2  27  -8    2.74    4.34
   2  27  -8    3.45    3.09
   2  26  -8   11.50    5.47
   2  25  -8   21.99    5.83
   2  24  -8   48.29    6.42
   2  23  -8   51.87    6.57
   2  22  -8   27.05    6.03
   2  21  -8  555.80   39.60
   2  20  -8   13.96    5.39
   2  19  -8  171.20   13.49
   2  18  -8  233.60   17.72
   2  17  -8  591.40   42.06
   2  16  -8  160.20   12.94
   2  15  -8  508.80   36.42
   2  14  -8  223.80   17.12
   2  13  -8    8.77    4.76
   2  12  -8 2927.00  203.10
   2  11  -8    7.14    3.96
   2  10  -8 1046.00   73.27
   2   9  -8   -0.89    4.21
   2   8  -8 1753.00  122.20
  -2  -7   8   62.57    6.10
   2   7  -8   64.02    6.08
  -2  -6   8  571.90   40.66
   2   6  -8  631.20   44.62
  -2  -5   8  617.00   43.75
   2   5  -8  615.50   43.58
  -2  -4   8   74.77    7.45
   2   4  -8   75.35    7.18
  -2  -3   8  305.70   22.43
   2   3  -8  298.20   21.80
  -2  -2   8  238.00   17.91
   2   2  -8  252.60   18.72
  -2  -1   8   34.62    5.29
   2   1  -8   32.71    4.80
  -2   0   8    4.22    3.80
   2   0  -8    5.02    3.81
  -2   1   8   24.25    4.87
   2  -1  -8   33.04    4.76
  -2   2   8  220.10   16.47
   2  -2  -8  223.90   16.75
  -2   3   8  287.60   20.92
   2  -3  -8  314.80   23.02
  -2   4   8   80.78    7.42
   2  -4  -8   69.95    6.49
  -2   5   8  648.40   45.79
   2  -5  -8  604.50   42.82
  -2   6   8  602.60   42.61
   2  -6  -8  605.60   42.86
  -2   7   8   48.23    5.82
   2  -7  -8   68.66    6.46
  -2   8   8 1440.00  100.40
   2  -8  -8 1434.00   99.99
  -2   9   8    5.02    4.02
   2  -9  -8    2.89    3.91
  -2  10   8 1184.00   82.89
   2 -10  -8 1214.00   84.83
  -2  11   8   14.92    4.34
   2 -11  -8   17.26    4.02
  -2  12   8 2993.00  207.70
   2 -12  -8 3047.00  211.30
  -2  13   8    9.12    4.03
   2 -13  -8    8.54    3.26
  -2  14   8  216.00   16.23
   2 -14  -8  187.60   14.27
  -2  15   8  477.80   34.11
   2 -15  -8  482.60   34.42
  -2  16   8  157.20   12.37
   2 -16  -8  154.00   11.94
  -2  17   8  643.10   45.50
   2 -17  -8  596.00   42.21
  -2  18   8  243.00   18.18
   2 -18  -8  255.00   18.89
  -2  19   8  154.80   12.09
   2 -19  -8  152.00   11.80
  -2  20   8   16.95    4.28
   2 -20  -8   20.81    3.64
  -2  21   8  555.10   39.27
   2 -21  -8  487.40   34.58
  -2  22   8   33.39    4.72
   2 -22  -8   28.07    4.22
  -2  23   8   40.82    5.21
   2 -23  -8   31.74    4.32
  -2  24   8   40.08    5.12
   2 -24  -8   47.13    5.14
  -2  25   8   16.96    4.25
   2 -25  -8   15.67    3.45
  -2  26   8   -3.45    3.60
   2 -26  -8    3.16    2.69
  -2  27   8    1.27    3.89
   2 -27  -8    0.84    2.60
  -2  28   8    7.26    3.94
   2 -28  -8   -1.21    3.03
   2  29  -7    9.64    3.61
   2  29  -7    5.03    4.95
   2  28  -7   51.70    6.67
   2  28  -7   37.47    4.81
   2  27  -7  235.20   17.69
   2  27  -7  218.70   16.17
   2  26  -7   63.12    7.07
   2  26  -7   63.83    6.21
   2  25  -7    9.17    5.27
   2  25  -7    5.77    2.78
   2  24  -7   52.12    6.60
   2  23  -7   15.06    5.63
   2  22  -7   34.68    5.81
   2  21  -7  199.10   15.41
   2  20  -7   98.80    9.06
   2  19  -7  112.80    9.79
   2  18  -7  642.40   45.51
   2  17  -7   28.28    5.59
   2  16  -7    2.31    4.77
   2  15  -7  597.10   42.46
   2  14  -7  395.30   28.50
   2  13  -7 1152.00   80.64
   2  12  -7    5.15    4.02
   2  11  -7  433.10   31.06
   2  10  -7  516.10   36.67
   2   9  -7  379.70   27.33
   2   8  -7  969.00   67.84
   2   7  -7 1915.00  133.10
  -2  -6   7 4909.00  339.90
   2   6  -7 4984.00  345.00
  -2  -5   7  150.40   12.06
   2   5  -7  162.30   12.52
  -2  -4   7  638.50   45.21
   2   4  -7  625.50   44.19
  -2  -3   7   95.25    8.76
   2   3  -7  105.10    8.73
  -2  -2   7   27.17    4.65
   2   2  -7   36.40    4.85
  -2  -1   7    0.38    4.05
   2   1  -7    4.11    3.60
  -2   0   7    1.02    4.10
   2   0  -7   -3.70    3.52
  -2   1   7   -1.92    3.53
   2  -1  -7   -0.33    3.40
  -2   2   7   23.61    4.24
   2  -2  -7   25.12    4.19
  -2   3   7   86.04    7.49
   2  -3  -7   91.17    8.04
  -2   4   7  718.10   50.53
   2  -4  -7  638.40   45.10
  -2   5   7   79.60    7.09
   2  -5  -7  185.40   14.18
  -2   6   7 4949.00  342.60
   2  -6  -7 5279.00  365.50
  -2   7   7 1939.00  134.80
   2  -7  -7 1938.00  134.70
  -2   8   7  978.90   68.64
   2  -8  -7  975.00   68.30
  -2   9   7  411.90   29.59
   2  -9  -7  411.50   29.49
  -2  10   7  544.30   38.67
   2 -10  -7  530.30   37.60
  -2  11   7  359.50   26.05
   2 -11  -7  436.30   31.20
  -2  12   7    5.64    3.87
   2 -12  -7    1.85    3.34
  -2  13   7 1164.00   81.51
   2 -13  -7 1140.00   79.71
  -2  14   7  378.30   27.38
   2 -14  -7  379.80   27.38
  -2  15   7  612.10   43.35
   2 -15  -7  597.70   42.31
  -2  16   7    3.83    3.67
   2 -16  -7   -0.86    3.39
  -2  17   7   26.30    4.12
   2 -17  -7   17.18    3.61
  -2  18   7  635.50   44.87
   2 -18  -7  645.00   45.64
  -2  19   7  108.60    9.25
   2 -19  -7  105.50    8.95
  -2  20   7   92.43    8.08
   2 -20  -7   94.42    8.13
  -2  21   7  189.30   14.52
   2 -21  -7  188.90   14.24
  -2  22   7   50.90    5.75
   2 -22  -7   49.36    5.11
  -2  23   7   16.49    3.63
   2 -23  -7   21.13    3.82
  -2  24   7   46.68    5.05
   2 -24  -7   41.55    4.79
  -2  25   7    8.58    3.60
   2 -25  -7   11.81    3.56
  -2  26   7   60.53    5.93
   2 -26  -7   55.54    5.61
  -2  27   7  207.40   15.34
   2 -27  -7  213.00   15.68
  -2  28   7   46.65    5.09
  -2  29   7    1.78    3.36
   2  30  -6    5.82    4.88
   2  30  -6    2.68    3.61
   2  29  -6   62.86    7.38
   2  29  -6   77.88    6.74
   2  28  -6    6.17    5.14
   2  28  -6    2.66    3.59
   2  27  -6   92.85    8.86
   2  27  -6   98.85    8.47
   2  26  -6   26.74    5.62
   2  26  -6   17.57    4.04
   2  25  -6   -1.29    4.98
   2  25  -6    4.70    3.12
   2  24  -6   67.33    7.44
   2  24  -6   64.51    6.26
   2  23  -6   70.48    7.59
   2  22  -6  147.30   12.08
   2  21  -6  101.30    9.30
   2  20  -6  454.70   32.64
   2  19  -6 1719.00  119.70
   2  18  -6  173.60   13.86
   2  17  -6   85.36    8.43
   2  16  -6   23.11    5.86
   2  15  -6  134.70   11.07
   2  14  -6    6.20    4.23
   2  13  -6  536.60   38.04
   2  12  -6  147.40   11.68
   2  11  -6   13.13    4.14
   2  10  -6    8.49    3.89
   2   9  -6   67.39    6.69
   2   8  -6  154.50   12.08
   2   7  -6 2506.00  173.90
  -2  -6   6   31.17    5.09
   2   6  -6   32.52    4.87
  -2  -5   6  248.30   18.45
   2   5  -6  220.60   16.36
  -2  -4   6   95.06    8.46
   2   4  -6   85.37    7.31
  -2  -3   6   -0.94    3.91
   2   3  -6   -0.93    2.71
  -2  -2   6    4.49    3.84
   2   2  -6    4.04    3.43
  -2  -1   6 1100.00   76.85
   2   1  -6 1155.00   80.55
  -2   0   6  149.10   11.58
   2   0  -6  149.70   11.69
  -2   1   6 1158.00   80.77
   2  -1  -6 1081.00   75.54
  -2   2   6    6.95    3.30
   2  -2  -6    4.73    3.47
  -2   3   6    5.12    3.63
   2  -3  -6    4.84    3.54
  -2   4   6   90.36    8.01
   2  -4  -6   90.74    7.81
  -2   5   6  236.30   17.50
   2  -5  -6  213.30   15.93
  -2   6   6   22.75    4.41
   2  -6  -6   27.68    4.21
  -2   7   6 2381.00  165.20
   2  -7  -6 2431.00  168.70
  -2   8   6   96.25    8.31
   2  -8  -6  149.00   11.69
  -2   9   6   62.70    6.12
   2  -9  -6   63.49    6.08
  -2  10   6    4.76    3.75
   2 -10  -6    6.10    3.75
  -2  11   6    8.25    3.90
   2 -11  -6    9.61    3.82
  -2  12   6  142.20   11.30
   2 -12  -6  118.30    9.75
  -2  13   6  569.50   40.48
   2 -13  -6  561.90   39.90
  -2  14   6   11.46    3.71
   2 -14  -6   12.02    3.96
  -2  15   6  134.90   10.79
   2 -15  -6  147.80   11.60
  -2  16   6   27.47    4.38
   2 -16  -6   26.29    4.19
  -2  17   6   82.58    7.65
   2 -17  -6   85.78    7.69
  -2  18   6  165.10   12.90
   2 -18  -6  168.30   12.94
  -2  19   6 1755.00  122.10
   2 -19  -6 2051.00  142.60
  -2  20   6  502.50   35.76
   2 -20  -6  477.10   33.99
  -2  21   6  139.90   11.23
   2 -21  -6  107.80    8.91
  -2  22   6  145.10   11.47
   2 -22  -6  150.00   11.65
  -2  23   6   63.24    6.17
   2 -23  -6   74.65    6.62
  -2  24   6   36.96    4.50
   2 -24  -6   39.10    4.63
  -2  25   6    1.43    3.56
   2 -25  -6   -3.78    3.35
  -2  26   6   21.95    3.97
  -2  27   6   28.77    4.44
  -2  28   6    5.38    3.77
  -2  29   6  106.20    8.89
  -2  30   6    1.18    3.14
   2  31  -5    1.70    3.58
   2  30  -5   21.76    3.95
   2  29  -5   54.48    5.70
   2  28  -5   42.10    5.17
   2  27  -5   17.76    3.76
   2  26  -5   19.75    4.01
   2  25  -5  388.60   27.92
   2  24  -5  201.60   15.23
   2  23  -5 1664.00  115.90
   2  22  -5   64.52    6.34
   2  15  -5  422.70   30.31
   2  14  -5   72.42    7.04
   2  13  -5  156.90   12.25
   2  12  -5   73.81    7.03
   2  11  -5   52.83    5.80
   2  10  -5   15.57    4.36
   2   9  -5  792.30   55.64
   2   8  -5  111.60    9.21
   2   7  -5    5.36    3.85
   2   6  -5   23.70    4.41
  -2  -5   5 2589.00  179.60
   2   5  -5 2463.00  170.80
  -2  -4   5   23.50    4.84
   2   4  -5   22.55    3.85
  -2  -3   5 5450.00  377.20
   2   3  -5 5085.00  351.90
  -2  -2   5  255.90   18.77
   2   2  -5  263.50   19.15
  -2  -1   5 2716.00  188.30
   2   1  -5 2265.00  157.10
  -2   0   5   -1.85    3.28
   2   0  -5   -3.55    3.33
  -2   1   5 1675.00  116.40
   2  -1  -5 2578.00  178.70
  -2   2   5  238.70   17.53
   2  -2  -5  238.10   17.47
  -2   3   5 5545.00  383.70
   2  -3  -5 5314.00  367.70
  -2   4   5   17.61    3.87
   2  -4  -5   20.76    3.88
  -2   5   5 2524.00  175.10
   2  -5  -5 2667.00  184.90
  -2   6   5   14.77    3.90
   2  -6  -5   19.65    3.89
  -2   7   5   14.15    3.52
   2  -7  -5   13.70    3.22
  -2   8   5   88.81    7.86
   2  -8  -5  102.70    8.41
  -2   9   5  879.20   61.68
   2  -9  -5  931.50   65.26
  -2  10   5   25.27    4.30
   2 -10  -5   20.23    3.28
  -2  11   5   50.04    5.61
   2 -11  -5   77.35    7.03
  -2  12   5   69.45    6.51
   2 -12  -5   72.74    6.73
  -2  13   5  160.70   12.61
   2 -13  -5  145.00   11.16
  -2  14   5   60.89    6.39
   2 -14  -5   71.76    6.89
  -2  15   5  473.30   33.94
   2 -15  -5  487.70   34.74
  -2  16   5   65.69    6.51
   2 -16  -5   64.54    6.78
  -2  17   5   69.51    6.73
   2 -17  -5  122.80   10.00
  -2  18   5   56.81    6.25
   2 -18  -5   48.88    5.24
  -2  19   5  780.20   54.89
   2 -19  -5  742.00   52.27
  -2  20   5  142.10   11.16
   2 -20  -5  148.40   11.65
  -2  21   5  479.60   34.12
   2 -21  -5  473.90   33.76
  -2  22   5   71.44    6.65
   2 -22  -5   58.25    6.01
  -2  23   5 1649.00  114.80
   2 -23  -5 1659.00  115.50
  -2  24   5  173.20   13.32
   2 -24  -5  209.20   15.54
  -2  25   5  369.10   26.45
  -2  26   5   18.52    4.16
  -2  27   5   23.71    4.47
  -2  28   5   43.14    4.81
  -2  29   5   58.99    6.00
  -2  30   5   27.26    4.42
  -2  31   5   -4.76    3.74
   2  31  -4   26.94    4.21
   2  30  -4   18.78    3.99
   2  29  -4    4.68    3.51
   2  28  -4   50.66    5.42
   2  27  -4   33.52    4.90
   2  26  -4  199.40   15.02
   2  25  -4    9.35    3.90
   2  24  -4  497.50   35.48
   2  23  -4    2.18    3.31
   2  22  -4  360.90   26.01
   2  21  -4   12.35    3.95
   2  20  -4  323.50   23.56
   2  10  -4   54.43    6.02
   2   9  -4  108.80    9.06
   2   8  -4  106.70    8.83
   2   7  -4  676.70   47.51
   2   6  -4  445.10   31.58
  -2  -5   4  462.70   32.77
   2   5  -4  491.30   34.74
  -2  -4   4 2506.00  173.70
   2   4  -4 2788.00  193.20
  -2  -3   4  228.00   16.80
   2   3  -4  213.50   15.63
  -2  -2   4  106.40    8.70
   2   2  -4   98.55    8.12
  -2  -1   4   62.75    6.20
   2   1  -4   68.41    6.37
  -2   1   4   56.28    5.46
   2  -1  -4   68.36    6.18
  -2   2   4   97.83    8.04
   2  -2  -4  104.20    8.45
  -2   3   4  238.00   17.29
   2  -3  -4  258.40   18.84
  -2   4   4 2839.00  196.70
   2  -4  -4 3047.00  211.10
  -2   5   4  473.60   33.51
   2  -5  -4  463.90   32.85
  -2   6   4  420.80   29.90
   2  -6  -4  400.90   28.58
  -2   7   4  653.70   45.96
   2  -7  -4  658.80   46.28
  -2   8   4  102.10    8.49
   2  -8  -4  108.40    8.73
  -2   9   4  104.40    8.81
   2  -9  -4  107.70    8.91
  -2  10   4   61.74    6.25
   2 -10  -4   56.98    5.33
  -2  11   4  241.60   17.91
   2 -11  -4  208.60   15.50
  -2  12   4  323.50   23.43
   2 -12  -4  338.10   24.41
  -2  13   4  550.70   39.07
   2 -13  -4  521.20   37.05
  -2  14   4  433.10   31.05
   2 -14  -4  541.30   38.35
  -2  15   4   31.54    4.88
   2 -15  -4   14.32    3.86
  -2  16   4   20.35    4.11
   2 -16  -4   30.78    4.81
  -2  17   4  601.50   42.63
   2 -17  -4  543.40   38.67
  -2  18   4  126.20   10.44
   2 -18  -4  119.60    9.89
  -2  19   4 1994.00  138.70
   2 -19  -4 1997.00  138.80
  -2  20   4  326.40   23.74
   2 -20  -4  335.10   24.36
  -2  21   4   11.08    3.89
   2 -21  -4   -1.08    2.89
  -2  22   4  399.80   28.68
  -2  23   4    9.57    3.93
  -2  24   4  534.50   37.94
  -2  25   4   11.19    3.85
  -2  26   4  179.50   13.64
  -2  27   4   37.62    4.50
  -2  28   4   18.91    4.24
  -2  29   4   -3.91    3.05
  -2  30   4   22.19    4.41
  -2  31   4   35.15    4.34
   2  32  -3   26.99    4.34
   2  31  -3   10.72    3.89
   2  30  -3  196.90   14.79
   2  29  -3   12.46    3.93
   2  28  -3  118.40    9.44
   2  27  -3  378.90   27.19
   2  26  -3  162.60   12.48
   2  25  -3   56.99    5.98
   2  24  -3   44.07    5.36
   2  23  -3   70.78    6.91
   2  22  -3  132.50   10.59
   2  21  -3  498.00   35.55
   2  20  -3   70.25    6.94
   2  19  -3  134.00   10.65
   2  18  -3 1365.00   95.19
   2  17  -3   -0.91    3.16
   2   7  -3  626.50   43.93
   2   6  -3   84.63    7.16
   2   5  -3  416.50   29.50
  -2  -4   3   37.58    4.76
   2   4  -3   31.92    4.31
  -2  -3   3 2364.00  163.90
   2   3  -3 2399.00  166.20
  -2  -2   3   53.69    5.49
   2   2  -3   50.25    5.03
  -2  -1   3  501.10   35.34
   2   1  -3  486.70   34.26
  -2   0   3    0.02    3.19
   2   0  -3   -1.23    2.89
  -2   1   3  463.40   32.70
   2  -1  -3  417.20   29.50
  -2   2   3   53.24    5.38
   2  -2  -3   55.05    5.50
  -2   3   3 2419.00  167.70
   2  -3  -3 2375.00  164.70
  -2   4   3   24.02    4.00
   2  -4  -3   25.27    4.15
  -2   5   3  194.50   14.47
   2  -5  -3  500.60   35.34
  -2   6   3  102.90    8.39
   2  -6  -3   82.66    7.00
  -2   7   3  608.20   42.74
   2  -7  -3  633.20   44.50
  -2   8   3  164.60   12.53
   2  -8  -3  138.00   10.68
  -2   9   3 1517.00  105.50
   2  -9  -3 1441.00  100.30
  -2  10   3 1492.00  103.80
   2 -10  -3 1597.00  111.10
  -2  11   3 1458.00  101.50
   2 -11  -3 1381.00   96.19
  -2  12   3  208.50   15.61
   2 -12  -3  208.40   15.57
  -2  13   3    6.24    3.34
   2 -13  -3   11.13    3.44
  -2  14   3  262.30   19.31
   2 -14  -3  282.80   20.70
  -2  15   3   53.17    5.82
   2 -15  -3   56.15    5.87
  -2  16   3   29.52    4.34
   2 -16  -3   29.36    4.38
  -2  17   3    0.37    2.81
   2 -17  -3    3.82    2.97
  -2  18   3 1341.00   93.62
   2 -18  -3 1421.00   99.12
  -2  19   3  142.60   11.38
  -2  20   3   64.08    6.76
  -2  21   3  511.50   36.50
  -2  22   3  120.00    9.71
  -2  23   3   70.95    6.86
  -2  24   3   43.63    5.39
  -2  25   3   96.41    8.38
  -2  26   3  111.30    9.30
  -2  27   3  409.20   29.19
  -2  28   3  129.40   10.30
  -2  29   3   15.26    3.85
  -2  30   3  239.20   17.57
  -2  31   3    1.04    3.15
  -2  32   3   19.98    4.13
   2  32  -2   53.00    5.60
   2  31  -2  116.30    9.38
   2  30  -2   -1.44    3.18
   2  29  -2   25.22    4.32
   2  28  -2   33.70    4.81
   2  27  -2  103.00    8.59
   2  26  -2  445.50   31.71
   2  25  -2  114.50    9.53
   2  24  -2   74.85    6.96
   2  23  -2   -7.84    3.49
   2  22  -2  381.00   27.51
   2  21  -2  340.50   24.72
   2  20  -2   64.17    6.63
   2  19  -2    0.01    3.27
   2  18  -2   44.16    5.38
   2  17  -2  474.10   33.73
   2  16  -2 1901.00  132.10
   2  15  -2 2533.00  175.80
   2  14  -2 3781.00  261.90
   2  13  -2  932.80   65.27
   2   4  -2 1254.00   87.07
   2   3  -2   58.64    5.35
  -2  -2   2 1211.00   84.03
   2   2  -2 1239.00   85.93
  -2   0   2    0.87    2.55
   2   0  -2    0.91    2.30
  -2   2   2 1310.00   90.94
   2  -2  -2 1308.00   90.73
  -2   3   2   69.97    6.17
   2  -3  -2   65.36    5.85
  -2   4   2 1099.00   76.49
   2  -4  -2 1116.00   77.68
  -2   5   2  208.10   15.34
   2  -5  -2  162.50   12.23
  -2   6   2  634.50   44.53
   2  -6  -2  678.80   47.60
  -2   7   2 2510.00  174.00
   2  -7  -2 2690.00  186.50
  -2   8   2  132.50   10.22
   2  -8  -2  127.50   10.08
  -2   9   2   60.03    5.69
   2  -9  -2   66.82    6.22
  -2  10   2   37.27    4.35
   2 -10  -2   39.93    4.84
  -2  11   2  241.80   17.76
   2 -11  -2  234.20   17.23
  -2  12   2 6968.00  482.00
   2 -12  -2 7083.00  490.00
  -2  13   2  855.40   59.97
   2 -13  -2  941.30   65.92
  -2  14   2 3899.00  270.00
   2 -14  -2 3724.00  258.10
  -2  15   2 2470.00  171.40
   2 -15  -2 2618.00  181.70
  -2  16   2 1817.00  126.40
  -2  17   2  501.50   35.74
  -2  18   2   45.37    5.67
  -2  19   2   -2.06    3.38
  -2  20   2   79.61    7.61
  -2  21   2  342.00   24.81
  -2  22   2  348.80   25.27
  -2  23   2    7.02    3.01
  -2  24   2   89.18    7.92
  -2  25   2   89.78    7.98
  -2  26   2  425.10   30.31
  -2  27   2   88.83    7.76
  -2  28   2   47.52    5.78
  -2  29   2   23.28    4.40
  -2  30   2    0.57    3.33
  -2  31   2  137.00   10.57
  -2  32   2   58.68    5.52
   2  32  -1   20.10    4.00
   2  31  -1   36.94    4.72
   2  30  -1   40.72    4.88
   2  29  -1   -3.02    3.13
   2  28  -1   -2.47    3.14
   2  27  -1   13.76    3.71
   2  26  -1    5.75    3.75
   2  25  -1   19.67    4.39
   2  24  -1   20.89    4.52
   2  23  -1   68.06    6.85
   2  22  -1   97.98    8.56
   2  21  -1  416.00   29.80
   2  20  -1  866.40   60.81
   2  19  -1  370.90   26.73
   2  18  -1  141.70   11.25
   2  17  -1  324.90   23.57
   2  16  -1  433.80   30.95
   2  15  -1 1701.00  118.30
   2  14  -1    6.24    3.21
   2  13  -1 2468.00  171.20
   2  12  -1    2.37    2.93
   2  11  -1 5145.00  356.00
   2  10  -1    1.84    2.72
   2   9  -1 1062.00   73.91
   2   8  -1  286.10   20.43
   2   7  -1   50.68    4.45
   2   2  -1  128.10    9.12
  -2   0   1   -0.99    1.38
   2   0  -1    0.84    1.38
  -2   2   1  132.50    9.67
   2  -2  -1  126.10    9.25
  -2   3   1  679.10   47.33
   2  -3  -1  845.50   58.83
  -2   4   1  340.40   24.18
   2  -4  -1  334.50   23.82
  -2   5   1 1757.00  121.90
   2  -5  -1 1724.00  119.70
  -2   6   1 2122.00  147.20
   2  -6  -1 2052.00  142.30
  -2   7   1   48.85    5.21
   2  -7  -1   58.37    5.79
  -2   8   1  301.50   21.63
   2  -8  -1  320.20   22.92
  -2   9   1 1173.00   81.73
   2  -9  -1 1134.00   79.04
  -2  10   1    3.48    3.05
  -2  11   1 5324.00  368.40
  -2  12   1    4.31    3.51
  -2  13   1 2386.00  165.60
  -2  14   1    5.91    3.54
  -2  15   1 1598.00  111.20
  -2  16   1  461.40   32.87
  -2  17   1  349.40   25.30
  -2  18   1  119.80    9.78
  -2  19   1  348.50   25.28
  -2  20   1  998.30   70.03
  -2  21   1  411.70   29.65
  -2  22   1   98.17    8.27
  -2  23   1   76.10    7.13
  -2  24   1   14.94    4.24
  -2  25   1   29.95    4.64
  -2  26   1   11.06    4.07
  -2  27   1    8.09    3.87
  -2  28   1    5.82    3.23
  -2  29   1    7.62    3.63
  -2  30   1   41.12    4.30
  -2  31   1   28.31    3.49
  -2  32   1   19.03    3.42
   2  32   0    7.77    3.61
   2  31   0    5.65    3.74
   2  30   0   60.47    6.02
   2  29   0   37.19    4.94
   2  28   0    0.07    3.57
   2  27   0   93.21    8.11
   2  26   0   31.68    4.28
   2  25   0   34.04    4.53
   2  24   0    4.03    3.44
   2  23   0   45.92    5.40
   2  22   0  609.30   43.13
   2  21   0   25.41    4.56
   2  20   0  163.70   12.75
   2  19   0   43.00    4.92
   2  18   0  347.20   25.07
   2  17   0  844.60   59.26
   2  16   0 1095.00   76.48
   2  15   0  283.20   20.55
   2  14   0 1530.00  106.40
   2  13   0  507.20   35.82
   2  12   0 1827.00  126.90
   2  11   0  996.00   69.49
   2  10   0 7665.00  530.00
   2   9   0  600.60   42.11
   2   8   0  173.60   12.79
   2   7   0 1351.00   93.75
   2   6   0    4.86    2.45
  -2  -5   0    1.74    2.20
   2   5   0    2.33    2.05
  -2  -4   0  305.50   21.45
   2   4   0  295.80   20.76
  -2  -3   0  422.50   29.42
   2   3   0  425.90   29.63
  -2  -2   0 1540.00  106.70
  -2   4   0  329.10   23.43
  -2   5   0    2.06    3.42
  -2   6   0    2.14    3.37
  -2   7   0 1184.00   82.42
  -2   8   0  151.10   11.50
  -2   9   0  603.00   42.45
  -2  10   0 6770.00  468.30
  -2  11   0  956.60   66.85
  -2  12   0 1825.00  126.90
  -2  13   0  512.90   36.45
  -2  14   0  823.10   57.72
  -2  15   0  313.80   22.77
  -2  16   0  857.30   60.10
  -2  17   0  794.10   55.76
  -2  18   0  405.30   29.05
  -2  19   0   33.07    4.74
  -2  20   0  168.20   13.05
  -2  21   0    8.10    3.79
  -2  22   0  629.90   44.61
  -2  23   0   48.81    5.53
  -2  24   0    7.91    3.65
  -2  25   0   28.30    4.10
  -2  26   0   36.26    4.57
  -2  27   0   82.54    7.26
  -2  28   0    0.87    2.54
  -2  29   0   24.65    4.12
  -2  30   0   77.37    6.65
  -2  31   0    9.76    3.36
  -2  32   0    0.21    3.43
   2  32   1   43.24    4.65
   2  31   1   -0.59    3.48
   2  30   1    3.24    3.72
   2  29   1   85.89    7.70
   2  28   1   13.17    3.98
   2  27   1   16.03    3.73
   2  26   1   72.45    6.75
   2  25   1    0.18    3.91
   2  24   1   92.04    8.03
   2  23   1   59.37    6.15
   2  22   1    6.31    3.81
   2  21   1   10.40    3.52
   2  20   1  149.40   11.82
   2  19   1 1067.00   74.59
   2  18   1    0.71    2.94
   2  17   1  144.10   11.31
   2  16   1 1210.00   84.43
   2  15   1 1944.00  135.10
   2  14   1   85.69    7.31
  -2 -13  -1 2297.00  159.30
   2  13   1 2223.00  154.20
  -2 -12  -1  235.40   17.15
   2  12   1  200.90   14.86
  -2 -11  -1 2258.00  156.60
   2  11   1 2410.00  167.10
  -2 -10  -1  125.40    9.65
   2  10   1  122.20    9.44
  -2  -9  -1 4658.00  322.30
   2   9   1 4267.00  295.30
  -2  -8  -1   15.55    3.08
   2   8   1   18.98    3.08
  -2  -7  -1  589.00   41.22
   2   7   1  620.80   43.41
  -2  -6  -1  241.10   17.26
   2   6   1  214.20   15.39
  -2  -5  -1  223.60   16.00
   2   5   1  220.70   15.79
  -2  -4  -1  279.80   19.80
   2   4   1  288.20   20.39
  -2  -3  -1 1379.00   95.61
   2   3   1 1442.00   99.93
  -2  -2  -1  619.20   43.09
   2   2   1  598.60   41.68
  -2  -1  -1 2368.00  163.90
  -2   0  -1    1.51    2.44
   2   0   1   -0.86    2.61
  -2   1  -1 2348.00  162.60
  -2  11  -1 2396.00  166.20
  -2  12  -1  229.70   17.01
  -2  13  -1 2297.00  159.50
  -2  14  -1   91.77    8.00
  -2  15  -1 1992.00  138.50
  -2  16  -1 1152.00   80.42
  -2  17  -1  124.30   10.16
  -2  18  -1    1.80    3.32
  -2  19  -1 1093.00   76.39
  -2  20  -1  144.50   11.50
  -2  21  -1   13.16    4.28
  -2  22  -1    5.59    3.65
  -2  23  -1   58.59    6.21
  -2  24  -1  114.70    9.68
  -2  25  -1   -1.09    3.66
  -2  26  -1   68.08    6.59
  -2  27  -1   14.38    3.57
  -2  28  -1   20.13    3.65
  -2  29  -1   69.00    6.58
  -2  30  -1    4.20    3.63
  -2  31  -1    7.87    3.50
  -2  32  -1   37.97    4.60
   2  32   2    4.44    4.01
   2  31   2   17.95    3.99
   2  30   2   11.83    3.59
   2  29   2  165.70   12.69
   2  28   2   49.05    5.43
   2  27   2  191.70   14.38
   2  26   2   61.07    6.16
   2  25   2    2.32    3.20
   2  24   2    5.18    3.87
   2  23   2  725.40   51.09
   2  22   2  129.90   10.52
   2  21   2   11.32    3.88
   2  20   2  290.90   21.30
   2  19   2  352.00   25.46
   2  18   2  193.70   14.70
  -2 -17  -2  400.60   28.67
   2  17   2  414.90   29.67
  -2 -16  -2  295.70   21.43
   2  16   2  288.60   20.96
  -2 -15  -2  259.90   18.90
   2  15   2  270.80   19.78
  -2 -14  -2  634.80   44.61
   2  14   2  665.80   46.85
  -2 -13  -2   24.37    3.63
   2  13   2   28.04    3.89
  -2 -12  -2  214.30   15.82
   2  12   2  217.60   16.02
  -2 -11  -2   -2.87    2.84
   2  11   2   -2.93    2.67
  -2 -10  -2   61.52    5.56
   2  10   2   57.97    5.45
  -2  -9  -2 1389.00   96.56
   2   9   2 1398.00   97.16
  -2  -8  -2  338.20   24.07
   2   8   2  268.80   19.30
  -2  -7  -2  124.60    9.47
   2   7   2  106.10    8.31
  -2  -6  -2   76.05    6.23
   2   6   2   76.66    6.31
  -2  -5  -2    6.44    2.40
   2   5   2    4.90    2.58
  -2  -4  -2  323.30   22.93
   2   4   2  314.40   22.30
  -2  -3  -2 1221.00   84.78
   2   3   2 1265.00   87.82
  -2  -2  -2 3344.00  231.40
   2   2   2 3416.00  236.40
  -2  -1  -2 1104.00   76.75
   2   1   2 1113.00   77.34
  -2   0  -2  651.00   45.52
   2   0   2  446.90   31.47
  -2   1  -2 1178.00   81.89
   2  -1   2 1197.00   83.17
  -2   2  -2 3841.00  265.80
  -2   3  -2 1335.00   92.79
  -2   4  -2  349.60   24.92
  -2  15  -2  279.90   20.58
  -2  16  -2  288.20   20.93
  -2  17  -2  353.90   25.63
  -2  18  -2  170.80   13.22
  -2  19  -2  319.40   23.16
  -2  20  -2  235.90   17.53
  -2  21  -2    0.29    3.45
  -2  22  -2  121.30   10.13
  -2  23  -2  373.70   27.07
  -2  24  -2    7.56    3.52
  -2  25  -2   -1.89    3.88
  -2  26  -2   46.81    5.23
  -2  27  -2  185.00   13.96
  -2  28  -2   37.01    4.76
  -2  29  -2  132.60   10.61
  -2  30  -2   11.49    3.34
  -2  31  -2   18.41    3.73
  -2  32  -2    4.78    3.62
   2  31   3   40.20    5.06
   2  30   3   18.23    3.98
   2  29   3   60.40    6.03
   2  28   3   99.75    8.35
   2  27   3  173.30   13.24
   2  26   3    3.69    3.66
   2  25   3   98.71    8.43
   2  24   3   20.63    4.15
   2  23   3  684.90   48.30
   2  22   3  161.50   12.52
   2  21   3  372.00   26.83
  -2 -20  -3   69.18    6.22
   2  20   3   74.77    7.04
  -2 -19  -3  107.00    8.74
   2  19   3  113.20    9.41
  -2 -18  -3  675.10   47.52
   2  18   3  728.10   51.22
  -2 -17  -3  166.60   12.74
   2  17   3  138.50   10.97
  -2 -16  -3  223.90   16.68
   2  16   3  215.70   16.01
  -2 -15  -3 1160.00   80.93
   2  15   3 1082.00   75.57
  -2 -14  -3  102.60    8.40
   2  14   3   84.28    7.30
  -2 -13  -3  495.10   34.97
   2  13   3  492.60   34.93
  -2 -12  -3  976.80   68.19
   2  12   3  844.50   59.12
  -2 -11  -3  190.90   14.17
   2  11   3  162.50   12.31
  -2 -10  -3   27.15    3.83
   2  10   3   28.59    3.76
  -2  -9  -3    1.53    2.65
   2   9   3    5.83    3.14
  -2  -8  -3 1227.00   85.43
   2   8   3 1145.00   79.76
  -2  -7  -3   90.75    7.47
   2   7   3   74.09    6.37
  -2  -6  -3    2.63    2.67
   2   6   3    8.65    2.83
  -2  -5  -3   59.18    5.32
   2   5   3   68.15    5.95
  -2  -4  -3   43.96    4.47
   2   4   3   40.53    4.52
  -2  -3  -3 2172.00  150.50
   2   3   3 2242.00  155.40
  -2  -2  -3   -2.65    2.56
   2   2   3    5.93    2.97
  -2  -1  -3 2779.00  192.50
   2   1   3 2621.00  181.60
  -2   0  -3    2.42    2.58
   2   0   3    2.78    3.18
  -2   1  -3 2713.00  187.90
   2  -1   3 2528.00  175.20
  -2   2  -3   -1.78    3.18
   2  -2   3    4.74    3.40
  -2   3  -3 2200.00  152.50
  -2   4  -3   42.44    4.85
  -2   5  -3   52.02    5.46
  -2   6  -3    1.93    3.77
  -2  18  -3  740.20   52.18
  -2  19  -3  106.50    8.93
  -2  20  -3   49.60    5.33
  -2  21  -3  363.40   26.23
  -2  22  -3  146.90   11.49
  -2  23  -3  724.80   51.10
  -2  24  -3   16.98    4.06
  -2  25  -3  101.00    8.73
  -2  26  -3    0.76    3.05
  -2  27  -3  175.80   13.51
  -2  28  -3  100.80    8.16
  -2  29  -3   53.10    5.67
  -2  30  -3   11.66    3.90
  -2  31  -3   50.20    4.93
   2  31   4   16.84    4.73
   2  30   4  104.80    8.89
   2  29   4   -0.81    3.61
   2  28   4  102.90    8.55
   2  27   4    3.83    3.73
   2  26   4  412.70   29.51
   2  25   4  178.50   13.59
   2  24   4  606.90   42.85
   2  23   4   21.46    4.21
  -2 -22  -4  847.00   59.37
   2  22   4  818.90   57.54
  -2 -21  -4   -0.53    3.04
   2  21   4    4.78    3.71
  -2 -20  -4   98.36    8.21
   2  20   4   85.71    7.65
  -2 -19  -4    6.39    2.90
   2  19   4   -2.04    3.56
  -2 -18  -4   94.52    7.93
   2  18   4  109.10    9.09
  -2 -17  -4    6.98    3.23
   2  17   4    0.87    3.22
  -2 -16  -4  364.90   26.21
   2  16   4  350.40   25.26
  -2 -15  -4  188.90   14.28
   2  15   4  187.30   14.12
  -2 -14  -4  635.40   44.82
   2  14   4  628.30   44.32
  -2 -13  -4  447.40   31.79
   2  13   4  435.40   31.02
  -2 -12  -4   39.32    4.30
   2  12   4   50.40    5.34
  -2 -11  -4  177.40   13.26
   2  11   4  157.50   12.09
  -2 -10  -4    5.49    3.01
   2  10   4    3.84    2.98
  -2  -9  -4   10.72    3.22
   2   9   4   11.09    3.14
  -2  -8  -4  202.00   14.91
   2   8   4  197.20   14.62
  -2  -7  -4  643.20   45.15
   2   7   4  650.20   45.65
  -2  -6  -4   12.71    3.15
   2   6   4    8.07    3.08
  -2  -5  -4  796.50   55.71
   2   5   4  797.20   55.78
  -2  -4  -4 6497.00  449.40
   2   4   4 6670.00  461.40
  -2  -3  -4 1486.00  103.30
   2   3   4 1180.00   82.18
   2   2   4 9936.00  686.90
  -2  -1  -4   52.54    5.10
   2   1   4   60.50    5.95
  -2   0  -4 5229.00  361.70
   2   0   4 5379.00  372.20
  -2   1  -4   67.13    5.92
   2  -1   4   66.79    6.49
  -2   2  -4 8554.00  591.50
  -2   3  -4 1354.00   94.31
  -2   4  -4 6467.00  447.40
  -2   5  -4  893.30   62.60
  -2   6  -4   11.53    3.68
  -2   7  -4  641.50   45.20
  -2   8  -4  178.90   13.84
  -2   9  -4   14.23    4.42
  -2  10  -4    6.94    3.90
  -2  20  -4  103.50    8.42
  -2  21  -4    1.14    3.64
  -2  22  -4  834.70   58.52
  -2  23  -4   23.03    3.92
  -2  24  -4  697.30   49.17
  -2  25  -4  149.00   11.65
  -2  26  -4  413.20   29.41
  -2  27  -4    1.30    3.76
  -2  28  -4  114.50    9.23
  -2  29  -4    0.38    3.52
  -2  30  -4   72.93    6.53
   2  30   5    4.38    3.94
   2  29   5   69.07    6.45
   2  28   5  106.10    8.66
   2  27   5  109.80    9.07
   2  26   5  123.50    9.96
   2  25   5  175.50   13.37
  -2 -24  -5   31.25    4.30
   2  24   5   30.34    4.40
  -2 -23  -5   53.40    5.49
   2  23   5   57.39    5.92
  -2 -22  -5   -1.35    3.18
   2  22   5   -2.11    3.54
  -2 -21  -5   81.78    7.19
   2  21   5   80.19    7.33
  -2 -20  -5  301.60   21.79
   2  20   5  286.60   20.99
  -2 -19  -5   54.03    5.42
   2  19   5   42.06    5.30
  -2 -18  -5  309.10   22.40
   2  18   5  337.80   24.51
  -2 -17  -5   81.22    7.18
   2  17   5   75.75    7.02
  -2 -16  -5  132.40   10.46
   2  16   5  138.40   11.03
  -2 -15  -5    1.03    2.98
   2  15   5   -0.79    3.25
  -2 -14  -5   36.43    4.71
   2  14   5   43.35    5.21
  -2 -13  -5  613.30   43.33
   2  13   5  605.20   42.76
  -2 -12  -5  451.60   32.15
   2  12   5  253.40   18.62
  -2 -11  -5  493.40   35.01
   2  11   5  525.70   37.28
  -2 -10  -5  309.40   22.28
   2  10   5  290.80   21.17
  -2  -9  -5  123.40    9.61
   2   9   5  123.50    9.83
  -2  -8  -5    4.29    2.93
   2   8   5    6.98    3.26
  -2  -7  -5  166.90   12.61
   2   7   5  158.50   12.12
  -2  -6  -5  779.90   54.64
   2   6   5  805.50   56.44
  -2  -5  -5  381.20   27.22
   2   5   5  332.00   23.86
  -2  -4  -5 1669.00  116.00
   2   4   5 1792.00  124.50
  -2  -3  -5  690.90   48.49
   2   3   5  645.20   45.38
  -2  -2  -5  300.50   21.66
   2   2   5  298.30   21.61
  -2  -1  -5 1414.00   98.42
   2   1   5 1168.00   81.50
  -2   0  -5    0.50    3.07
   2   0   5   -3.38    3.60
  -2   1  -5 1612.00  112.10
   2  -1   5 1485.00  103.30
  -2   2  -5  310.20   22.46
   2  -2   5  217.80   16.25
  -2   3  -5  665.30   46.83
   2  -3   5  694.20   48.86
  -2   4  -5 1535.00  106.80
  -2   5  -5  360.10   25.91
  -2   6  -5  846.40   59.37
  -2   7  -5  160.00   12.59
  -2   8  -5    0.96    3.76
  -2   9  -5  107.60    8.97
  -2  10  -5  260.00   19.18
  -2  11  -5  510.00   36.32
  -2  12  -5  405.00   29.16
  -2  13  -5  611.10   43.27
  -2  14  -5   48.61    6.02
  -2  15  -5    1.88    4.92
  -2  16  -5  129.30   10.77
  -2  22  -5   -2.53    2.75
  -2  23  -5   57.30    5.95
  -2  24  -5   26.19    4.60
  -2  25  -5  178.30   13.29
  -2  26  -5  132.50   10.50
  -2  27  -5  104.40    8.56
  -2  28  -5   82.57    7.08
  -2  29  -5   60.15    5.95
  -2  30  -5    0.51    2.67
   2  29   6  146.20   11.43
   2  28   6  145.10   11.27
   2  27   6  144.20   11.27
  -2 -26  -6   47.28    4.67
   2  26   6   39.80    5.23
  -2 -25  -6   44.36    4.89
   2  25   6   40.97    5.01
  -2 -24  -6   39.06    4.69
   2  24   6   34.97    4.83
  -2 -23  -6    7.88    3.19
   2  23   6    8.66    3.74
  -2 -22  -6    4.60    2.67
   2  22   6    5.16    3.55
  -2 -21  -6    1.07    2.92
   2  21   6    4.79    3.68
  -2 -20  -6  561.90   39.74
   2  20   6  597.80   42.27
  -2 -19  -6   94.17    7.94
   2  19   6   90.93    8.17
  -2 -18  -6    9.25    3.42
   2  18   6   15.19    4.06
  -2 -17  -6  190.00   14.32
   2  17   6  189.20   14.49
  -2 -16  -6   11.23    3.41
   2  16   6   18.96    3.99
  -2 -15  -6   53.03    5.50
   2  15   6   51.03    5.63
  -2 -14  -6  290.40   21.10
   2  14   6  307.00   22.33
  -2 -13  -6    1.85    3.15
   2  13   6    0.29    3.25
  -2 -12  -6  120.00    9.73
   2  12   6  116.40    9.57
  -2 -11  -6   46.31    5.15
   2  11   6   56.78    5.76
  -2 -10  -6   -0.04    3.25
   2  10   6    1.25    3.39
  -2  -9  -6  297.00   21.66
   2   9   6  295.30   21.46
  -2  -8  -6  472.00   33.55
   2   8   6  478.90   34.08
  -2  -7  -6  185.00   13.94
   2   7   6  252.60   18.56
  -2  -6  -6  103.40    8.52
   2   6   6  109.80    9.05
  -2  -5  -6 1645.00  114.40
   2   5   6 1668.00  116.00
  -2  -4  -6  317.40   23.01
   2   4   6  343.60   24.80
  -2  -3  -6  731.20   51.42
   2   3   6  677.30   47.72
  -2  -2  -6   -0.27    3.26
   2   2   6    2.32    3.60
  -2  -1  -6  300.10   21.76
   2   1   6  306.40   22.30
  -2   0  -6  284.20   20.74
   2   0   6  403.60   29.04
  -2   1  -6  308.90   22.48
   2  -1   6  317.80   23.11
  -2   2  -6    4.43    3.41
   2  -2   6    2.94    3.91
  -2   3  -6  670.50   47.26
   2  -3   6  630.50   44.53
  -2   4  -6  322.70   23.36
  -2   5  -6 1624.00  113.00
  -2   6  -6   96.36    8.34
  -2   7  -6  245.10   18.12
  -2   8  -6  471.00   33.62
  -2   9  -6  246.60   18.29
  -2  10  -6   -4.30    3.88
  -2  11  -6   58.51    6.46
  -2  12  -6   93.50    8.51
  -2  13  -6    2.31    4.08
  -2  14  -6  300.90   22.34
  -2  15  -6   46.51    6.34
  -2  16  -6   11.55    5.11
  -2  17  -6  168.50   13.42
  -2  18  -6   21.22    5.74
  -2  19  -6   69.15    7.52
  -2  20  -6  594.00   42.15
  -2  21  -6   -0.62    4.99
  -2  22  -6    4.04    4.99
  -2  23  -6   10.31    4.99
  -2  24  -6   51.00    5.37
  -2  24  -6   40.02    6.26
  -2  25  -6   44.75    6.24
  -2  25  -6   26.55    4.27
  -2  26  -6   35.55    5.88
  -2  26  -6   49.62    5.29
  -2  27  -6  142.30   10.93
  -2  27  -6  140.60   11.50
  -2  28  -6  153.10   12.50
  -2  28  -6  141.60   10.83
  -2  29  -6  139.10   10.48
  -2  29  -6  144.80   11.78
   2  28   7    4.70    3.92
  -2 -27  -7   -0.89    3.16
   2  27   7   -4.23    3.51
  -2 -26  -7   97.40    8.08
   2  26   7   93.38    8.09
  -2 -25  -7    8.61    3.47
   2  25   7   10.00    3.76
  -2 -24  -7    5.12    3.22
   2  24   7    4.73    3.80
  -2 -23  -7   54.80    5.54
   2  23   7   47.84    5.40
  -2 -22  -7  279.80   20.29
   2  22   7  225.10   16.72
  -2 -21  -7   54.49    5.41
   2  21   7   59.44    6.07
  -2 -20  -7   78.09    7.02
   2  20   7   75.63    7.15
  -2 -19  -7  302.30   21.93
   2  19   7  266.80   19.61
  -2 -18  -7  167.40   12.79
   2  18   7  157.70   12.27
  -2 -17  -7  164.30   12.52
   2  17   7  157.70   12.33
  -2 -16  -7  392.60   28.18
   2  16   7  365.80   26.46
  -2 -15  -7  324.20   23.39
   2  15   7  349.50   25.27
  -2 -14  -7  767.30   53.85
   2  14   7  756.70   53.25
  -2 -13  -7  954.30   66.74
   2  13   7  903.10   63.34
  -2 -12  -7   59.72    5.85
   2  12   7   61.44    6.30
  -2 -11  -7  851.90   59.77
   2  11   7  894.80   62.79
  -2 -10  -7   49.59    5.01
   2  10   7   47.63    5.39
  -2  -9  -7  812.80   57.02
   2   9   7  711.00   50.11
  -2  -8  -7   10.11    3.00
   2   8   7    8.58    3.62
  -2  -7  -7 1002.00   70.06
   2   7   7 1098.00   76.80
  -2  -6  -7 1709.00  118.90
   2   6   7 1733.00  120.60
  -2  -5  -7 2293.00  159.20
   2   5   7 2260.00  157.00
  -2  -4  -7  605.30   42.78
   2   4   7  709.10   49.97
  -2  -3  -7   81.28    7.23
   2   3   7   97.21    8.37
  -2  -2  -7  188.40   14.19
   2   2   7  190.00   14.44
  -2  -1  -7   86.26    7.47
   2   1   7   87.64    7.81
  -2   0  -7    2.11    3.25
   2   0   7    2.23    3.73
  -2   1  -7   80.69    7.38
   2  -1   7   79.79    7.44
  -2   2  -7  176.40   13.36
   2  -2   7  198.00   15.08
  -2   3  -7   69.34    6.60
   2  -3   7   96.03    8.51
  -2   4  -7  788.20   55.45
   2  -4   7  792.70   55.70
  -2   5  -7 2305.00  160.20
  -2   6  -7 1499.00  104.50
  -2   7  -7  742.10   52.28
  -2   8  -7    0.09    4.08
  -2   9  -7  790.00   55.66
  -2  10  -7   58.88    6.73
  -2  11  -7  804.70   56.69
  -2  12  -7   54.46    6.66
  -2  13  -7 1072.00   75.32
  -2  14  -7  806.60   56.85
  -2  15  -7  385.50   27.82
  -2  16  -7  358.60   25.98
  -2  17  -7  161.50   13.20
  -2  18  -7  165.50   13.35
  -2  19  -7  253.20   19.06
  -2  20  -7   68.96    7.63
  -2  21  -7   51.16    6.61
  -2  22  -7  244.70   18.40
  -2  23  -7   53.13    6.60
  -2  24  -7    6.45    4.78
  -2  25  -7    8.81    3.65
  -2  25  -7    7.53    5.10
  -2  27  -7    2.44    3.15
  -2  27  -7   -2.12    4.81
  -2  28  -7    3.54    3.32
  -2  28  -7    0.91    5.31
  -2 -26  -8   80.57    6.95
   2  26   8   76.33    7.03
  -2 -25  -8   49.95    5.20
   2  25   8   41.95    5.05
  -2 -24  -8   23.55    3.82
   2  24   8   32.64    4.70
  -2 -23  -8   18.37    3.54
   2  23   8   32.20    4.88
  -2 -22  -8   38.73    4.48
   2  22   8   24.42    4.26
  -2 -21  -8   19.98    4.12
   2  21   8   24.52    4.36
  -2 -20  -8  122.90    9.85
   2  20   8  116.60    9.60
  -2 -19  -8   77.47    6.78
   2  19   8   88.72    7.85
  -2 -18  -8   85.14    7.34
   2  18   8   72.68    6.87
  -2 -17  -8   55.69    5.50
   2  17   8   72.37    6.92
  -2 -16  -8  233.40   17.22
   2  16   8  240.30   17.77
  -2 -15  -8   12.56    3.63
   2  15   8    8.27    3.90
  -2 -14  -8   34.43    4.48
   2  14   8   31.53    4.62
  -2 -13  -8  219.70   16.30
   2  13   8  216.70   16.25
  -2 -12  -8  130.00   10.28
   2  12   8  117.60    9.61
  -2 -11  -8   29.89    4.12
   2  11   8   42.42    5.12
  -2 -10  -8  134.70   10.57
   2  10   8   98.86    8.48
  -2  -9  -8    2.92    2.98
   2   9   8    5.78    3.50
  -2  -8  -8   21.62    3.71
   2   8   8   14.13    3.84
  -2  -7  -8    4.78    3.27
   2   7   8    4.95    3.43
  -2  -6  -8   16.61    3.52
   2   6   8   15.08    3.80
  -2  -5  -8  174.20   13.32
   2   5   8  199.40   15.17
  -2  -4  -8   67.74    6.53
   2   4   8   68.10    6.83
  -2  -3  -8   16.88    3.85
   2   3   8   21.45    4.50
  -2  -2  -8  308.00   22.44
   2   2   8  308.00   22.56
  -2  -1  -8   31.52    4.85
   2   1   8   33.18    5.03
  -2   0  -8 2949.00  204.60
   2   0   8 2139.00  148.70
  -2   1  -8   19.10    4.19
   2  -1   8   25.61    4.92
  -2   2  -8  309.70   22.59
   2  -2   8  198.30   15.16
  -2   3  -8   17.78    3.92
   2  -3   8   18.84    4.58
  -2   4  -8   74.07    6.92
   2  -4   8   86.52    8.04
  -2   5  -8  195.40   14.83
  -2   6  -8    8.93    3.39
  -2   7  -8    3.14    3.35
  -2   8  -8   18.97    4.74
  -2   9  -8    5.29    4.45
  -2  10  -8  145.10   11.97
  -2  11  -8   34.32    5.74
  -2  12  -8  127.90   10.67
  -2  13  -8  230.30   17.52
  -2  14  -8   29.83    5.51
  -2  15  -8    9.22    4.45
  -2  16  -8  248.10   18.63
  -2  17  -8   55.78    6.41
  -2  18  -8   93.00    8.58
  -2  19  -8   79.24    8.08
  -2  20  -8  119.30   10.22
  -2  21  -8   17.55    5.10
  -2  22  -8   39.29    5.74
  -2  23  -8   24.85    5.59
  -2  24  -8   23.97    5.36
  -2  25  -8   46.20    5.71
  -2  26  -8   66.20    5.80
  -2  26  -8   68.97    7.31
  -2 -25  -9   15.63    3.79
   2  25   9   16.23    4.09
  -2 -24  -9   34.59    4.49
   2  24   9   22.99    4.02
  -2 -23  -9    8.35    3.36
   2  23   9    2.88    3.67
  -2 -22  -9   90.14    7.58
   2  22   9   95.42    8.24
  -2 -21  -9   13.88    3.60
   2  21   9   11.98    3.62
  -2 -20  -9   66.14    6.27
   2  20   9   64.79    6.42
  -2 -19  -9    6.94    3.31
   2  19   9    5.79    3.83
  -2 -18  -9   62.99    6.02
   2  18   9   53.84    5.78
  -2 -17  -9  531.60   37.53
   2  17   9  628.80   44.40
  -2 -16  -9  120.90    9.76
   2  16   9  115.90    9.48
  -2 -15  -9  290.50   21.01
   2  15   9  307.80   22.35
  -2 -14  -9  119.50    9.52
   2  14   9  120.40    9.82
  -2 -13  -9  453.80   32.34
   2  13   9  473.70   33.79
  -2 -12  -9  101.80    8.51
   2  12   9   97.59    8.34
  -2 -11  -9  247.70   18.18
   2  11   9  252.00   18.57
  -2 -10  -9   51.48    5.38
   2  10   9   50.51    5.57
  -2  -9  -9  111.70    9.16
   2   9   9   72.25    6.82
  -2  -8  -9  407.10   29.14
   2   8   9  434.80   31.07
  -2  -7  -9 1490.00  103.80
   2   7   9 1257.00   87.74
  -2  -6  -9    2.83    3.37
   2   6   9   -2.70    3.66
  -2  -5  -9  582.80   41.27
   2   5   9  631.40   44.62
  -2  -4  -9   90.95    7.95
   2   4   9   99.69    8.69
  -2  -3  -9  195.40   14.80
   2   3   9  199.90   15.18
  -2  -2  -9    8.21    3.71
   2   2   9    9.11    3.99
  -2  -1  -9  193.40   14.64
   2   1   9  154.30   12.14
  -2   0  -9    7.09    3.42
   2   0   9   -0.80    3.35
  -2   1  -9  201.10   15.22
   2  -1   9  183.80   14.04
  -2   2  -9    9.41    3.58
   2  -2   9   22.09    4.24
  -2   3  -9  187.30   14.29
   2  -3   9  191.90   14.58
  -2   4  -9   71.20    6.64
   2  -4   9   92.27    7.97
  -2   5  -9  680.90   48.09
  -2   6  -9    8.13    3.44
  -2   7  -9 1397.00   97.38
  -2   8  -9  438.70   31.39
  -2   9  -9  115.90    9.57
  -2  10  -9   64.66    6.80
  -2  11  -9  241.40   18.11
  -2  12  -9  119.40   10.15
  -2  13  -9  458.00   32.83
  -2  14  -9  113.90    9.65
  -2  15  -9  317.90   23.28
  -2  16  -9  138.10   11.42
  -2  17  -9  677.90   47.96
  -2  18  -9   52.20    6.46
  -2  19  -9    1.41    4.29
  -2  20  -9   71.80    7.56
  -2  21  -9   15.85    5.32
  -2  22  -9  111.60    9.83
  -2  23  -9    1.36    4.88
  -2  24  -9   22.74    5.44
  -2  25  -9    5.67    5.15
  -2 -23 -10   13.83    3.58
   2  23  10   14.79    3.93
  -2 -22 -10    3.68    3.54
   2  22  10    4.18    3.61
  -2 -21 -10   12.41    3.65
   2  21  10    5.90    3.68
  -2 -20 -10   72.30    6.35
   2  20  10   63.17    6.67
  -2 -19 -10   38.57    4.61
   2  19  10   25.89    4.29
  -2 -18 -10   21.55    3.65
   2  18  10    4.58    3.68
  -2 -17 -10   11.66    3.38
   2  17  10   17.73    4.05
  -2 -16 -10    8.68    3.49
   2  16  10   13.35    3.81
  -2 -15 -10    3.73    3.27
   2  15  10    0.61    3.45
  -2 -14 -10  144.00   11.12
   2  14  10  145.90   11.44
  -2 -13 -10    6.79    3.55
   2  13  10    8.06    3.65
  -2 -12 -10  315.40   22.76
   2  12  10  305.20   22.19
  -2 -11 -10  205.40   15.21
   2  11  10  210.20   15.75
  -2 -10 -10  389.00   27.89
   2  10  10  407.30   29.26
  -2  -9 -10    5.12    3.40
   2   9  10   14.98    4.30
  -2  -8 -10  836.00   58.63
   2   8  10  822.20   57.76
  -2  -7 -10  123.80    9.85
   2   7  10  135.80   10.93
  -2  -6 -10  483.00   34.31
   2   6  10  440.30   31.45
  -2  -5 -10 1172.00   81.81
   2   5  10 1112.00   77.66
  -2  -4 -10    3.75    3.30
   2   4  10    8.03    3.76
  -2  -3 -10  832.90   58.47
   2   3  10  691.20   48.73
  -2  -2 -10  130.30   10.45
   2   2  10  187.00   14.14
  -2  -1 -10  362.10   26.10
   2   1  10  336.10   24.33
  -2   0 -10  426.50   30.50
   2   0  10  471.00   33.60
  -2   1 -10  356.20   25.73
   2  -1  10  353.10   25.47
  -2   2 -10  175.10   13.43
   2  -2  10  182.70   13.93
  -2   3 -10  685.90   48.38
   2  -3  10  659.30   46.48
  -2   4 -10    7.63    3.22
  -2   5 -10 1038.00   72.54
  -2   6 -10  475.60   33.87
  -2   7 -10  125.60   10.17
  -2   8 -10  812.00   57.04
  -2   9 -10    9.69    3.52
  -2  10 -10  402.50   28.85
  -2  11 -10  209.50   15.77
  -2  12 -10  302.70   22.05
  -2  13 -10    3.98    4.47
  -2  14 -10  142.10   11.63
  -2  15 -10   -3.56    4.64
  -2  16 -10    0.98    4.24
  -2  17 -10    9.57    4.71
  -2  18 -10   15.90    4.70
  -2  19 -10   28.41    5.71
  -2  20 -10   64.32    6.97
  -2  21 -10    5.45    4.63
  -2  22 -10    0.10    4.87
  -2  23 -10    8.50    5.24
  -2 -21 -11    2.90    3.44
   2  21  11    1.04    3.60
  -2 -20 -11   74.06    6.39
   2  20  11   77.19    6.88
  -2 -19 -11   39.95    4.88
   2  19  11   56.21    5.84
  -2 -18 -11  169.50   12.80
   2  18  11  187.90   14.18
  -2 -17 -11   60.76    5.60
   2  17  11   64.02    6.21
  -2 -16 -11   11.49    3.50
   2  16  11   11.07    3.79
  -2 -15 -11    9.32    2.99
   2  15  11   -2.83    3.23
  -2 -14 -11   25.99    4.36
   2  14  11   31.72    4.72
  -2 -13 -11   14.48    3.28
   2  13  11   18.24    3.92
  -2 -12 -11  184.70   13.87
   2  12  11  188.00   14.18
  -2 -11 -11    7.11    2.97
   2  11  11   12.29    4.17
  -2 -10 -11  233.40   17.28
   2  10  11  216.70   16.19
  -2  -9 -11   19.84    3.71
   2   9  11   48.43    5.53
  -2  -8 -11  369.70   26.45
   2   8  11  398.40   28.56
  -2  -7 -11    7.93    3.45
   2   7  11    8.57    4.00
  -2  -6 -11  558.90   39.54
   2   6  11  439.30   31.38
  -2  -5 -11    3.13    3.33
   2   5  11    4.87    3.68
  -2  -4 -11  626.60   44.30
   2   4  11  632.80   44.65
  -2  -3 -11   69.66    6.64
   2   3  11   67.81    6.30
  -2  -2 -11  370.70   26.80
   2   2  11  385.30   27.71
  -2  -1 -11  166.10   12.94
   2   1  11  172.10   13.30
  -2   0 -11    1.23    3.36
   2   0  11   -0.14    3.70
  -2   1 -11  161.40   12.45
   2  -1  11  173.30   13.41
  -2   2 -11  368.30   26.46
   2  -2  11  366.90   26.55
  -2   3 -11   59.39    5.86
   2  -3  11   65.49    6.64
  -2   4 -11  609.20   43.00
  -2   5 -11   -3.99    3.22
  -2   6 -11  529.30   37.51
  -2   7 -11    7.64    3.24
  -2   8 -11  360.00   25.96
  -2   9 -11   31.84    4.51
  -2  10 -11  229.50   16.91
  -2  11 -11    8.10    3.55
  -2  12 -11  184.30   13.93
  -2  13 -11   14.56    3.69
  -2  14 -11   32.99    4.52
  -2  15 -11   -6.18    3.26
  -2  16 -11    8.40    4.18
  -2  17 -11   52.79    6.23
  -2  18 -11  187.10   14.37
  -2  19 -11   38.03    5.72
  -2  20 -11   90.42    8.26
  -2  21 -11    0.79    4.89
  -2 -18 -12   34.03    4.27
   2  18  12   42.62    5.18
  -2 -17 -12  136.60   10.49
   2  17  12  107.10    8.86
  -2 -16 -12   17.99    3.69
   2  16  12   38.47    4.85
  -2 -15 -12   29.51    4.18
   2  15  12   24.85    4.22
  -2 -14 -12   -3.63    3.39
   2  14  12    3.29    3.56
  -2 -13 -12   13.64    3.32
   2  13  12   13.25    4.03
  -2 -12 -12   -2.51    3.26
   2  12  12    0.19    3.71
  -2 -11 -12    0.95    3.17
   2  11  12    4.23    3.78
  -2 -10 -12  212.10   15.61
   2  10  12  220.70   16.45
  -2  -9 -12   42.02    4.90
   2   9  12   47.65    5.34
  -2  -8 -12   -0.36    2.80
   2   8  12   -7.16    3.48
  -2  -7 -12   92.24    7.86
   2   7  12   86.79    7.66
  -2  -6 -12    2.26    3.15
   2   6  12   -3.41    3.56
  -2  -5 -12   16.73    3.98
   2   5  12   18.22    4.11
  -2  -4 -12  429.70   30.68
   2   4  12  371.40   26.71
  -2  -3 -12  232.80   17.26
   2   3  12  246.60   18.23
  -2  -2 -12  377.40   27.15
   2   2  12  374.10   26.92
  -2  -1 -12   17.23    3.70
   2   1  12   14.58    4.06
  -2   0 -12  522.80   37.06
   2   0  12  509.00   36.14
  -2   1 -12   12.60    3.66
   2  -1  12   20.39    4.33
  -2   2 -12  371.60   26.66
   2  -2  12  322.70   23.44
  -2   3 -12  240.40   17.66
  -2   4 -12  423.20   30.13
  -2   5 -12   22.05    4.04
  -2   6 -12   -2.80    3.33
  -2   7 -12  101.90    8.47
  -2   8 -12    2.73    3.31
  -2   9 -12   39.46    4.75
  -2  10 -12  230.00   16.95
  -2  11 -12    2.00    3.31
  -2  12 -12   -1.39    3.13
  -2  13 -12   12.95    3.73
  -2  14 -12   -3.04    3.35
  -2  15 -12   35.77    4.49
  -2  16 -12   17.14    3.70
  -2  17 -12  149.30   11.43
  -2  18 -12   35.41    4.57
  -2 -14 -13   34.38    4.31
   2  14  13   14.85    4.15
  -2 -13 -13    0.78    3.37
   2  13  13    7.15    3.94
  -2 -12 -13   86.37    7.38
   2  12  13   84.71    7.49
  -2 -11 -13   -4.13    3.22
   2  11  13    1.27    3.51
  -2 -10 -13    0.68    3.56
   2  10  13    8.78    3.68
  -2  -9 -13   60.74    5.90
   2   9  13   69.22    6.61
  -2  -8 -13   -2.61    2.93
   2   8  13    3.81    3.57
  -2  -7 -13    8.71    3.71
   2   7  13   13.06    4.06
  -2  -6 -13    3.96    3.46
   2   6  13   -1.06    4.05
  -2  -5 -13   62.88    6.05
   2   5  13   61.46    6.14
  -2  -4 -13   80.48    7.19
   2   4  13   70.79    6.51
  -2  -3 -13  461.80   32.87
   2   3  13  467.20   33.25
  -2  -2 -13   20.37    4.14
   2   2  13   24.87    4.38
  -2  -1 -13  266.20   19.44
   2   1  13  239.60   17.71
  -2   0 -13   -1.29    3.21
   2   0  13    5.61    3.80
  -2   1 -13  254.80   18.64
   2  -1  13  248.80   18.31
  -2   2 -13   23.26    4.04
   2  -2  13   34.70    4.30
  -2   3 -13  428.10   30.41
  -2   4 -13   83.45    7.25
  -2   5 -13   49.36    5.23
  -2   6 -13    3.50    3.28
  -2   7 -13   14.89    3.58
  -2   8 -13   -1.54    3.18
  -2   9 -13   49.50    5.25
  -2  10 -13   -3.95    3.18
  -2  11 -13    1.27    3.10
  -2  12 -13  108.50    8.73
  -2  13 -13   -5.09    3.15
  -2  14 -13   39.43    4.42
  -2  -9 -14    7.73    3.29
   2   9  14   16.60    4.43
  -2  -8 -14    4.68    3.03
   2   8  14    6.77    4.10
  -2  -7 -14   49.19    4.98
   2   7  14   60.21    6.05
  -2  -6 -14   25.44    4.10
   2   6  14   18.82    4.17
  -2  -5 -14    4.60    3.72
   2   5  14   12.73    3.88
  -2  -4 -14   21.18    4.10
   2   4  14   16.77    4.15
  -2  -3 -14   32.34    4.61
   2   3  14   37.17    5.14
  -2  -2 -14   86.48    7.62
   2   2  14   85.31    7.68
  -2  -1 -14   15.68    3.87
   2   1  14   30.22    4.74
  -2   0 -14  134.20   10.49
   2   0  14  134.80   10.71
  -2   1 -14   30.29    4.29
   2  -1  14   28.29    4.30
  -2   2 -14   94.94    8.08
  -2   3 -14   31.78    4.41
  -2   4 -14   19.14    4.02
  -2   5 -14    2.76    3.28
  -2   6 -14   21.14    3.88
  -2   7 -14   46.72    4.93
  -2   8 -14    4.25    3.28
  -2   9 -14    6.25    3.50
   3   7 -16    5.31    3.10
   3   6 -16   -3.22    3.36
   3   5 -16    5.26    3.49
  -3  -4  16   39.46    5.05
   3   4 -16   32.03    4.35
  -3  -3  16   11.90    3.97
   3   3 -16   12.76    3.41
  -3  -2  16  132.80   10.40
   3   2 -16  121.30    9.68
  -3  -1  16   31.44    4.48
   3   1 -16   26.71    4.33
  -3   0  16   76.56    6.86
   3   0 -16   76.60    6.84
  -3   1  16   29.62    4.19
   3  -1 -16   28.72    3.99
  -3   2  16  134.90   10.46
   3  -2 -16  123.60    9.82
  -3   3  16    9.36    3.87
   3  -3 -16    9.05    3.66
  -3   4  16   39.92    4.90
   3  -4 -16   31.12    4.29
  -3   5  16    2.72    3.59
   3  -5 -16    3.21    3.07
  -3   6  16   -3.26    3.33
   3  -6 -16    6.17    3.11
  -3   7  16   -5.04    3.41
   3  -7 -16    1.19    2.39
   3  13 -15  119.90    9.53
   3  12 -15   58.04    5.64
   3  11 -15  162.80   12.26
   3  10 -15   -0.76    3.10
   3   9 -15  276.20   20.03
   3   8 -15   47.69    5.12
   3   7 -15  254.20   18.58
   3   6 -15    1.58    3.37
  -3  -5  15   63.27    6.05
   3   5 -15   71.85    6.55
  -3  -4  15   11.37    3.60
   3   4 -15   11.04    3.66
  -3  -3  15   16.86    4.33
   3   3 -15    9.30    3.43
  -3  -2  15   28.81    4.82
   3   2 -15   29.48    4.24
  -3  -1  15   27.00    4.44
   3   1 -15   28.14    4.29
  -3   0  15    1.28    3.74
   3   0 -15   -3.22    3.46
  -3   1  15   27.19    4.61
   3  -1 -15   22.61    4.12
  -3   2  15   34.28    4.93
   3  -2 -15   31.10    4.21
  -3   3  15   14.13    3.97
   3  -3 -15   10.63    3.36
  -3   4  15   11.07    3.77
   3  -4 -15   17.44    3.29
  -3   5  15   75.76    6.95
   3  -5 -15   74.66    6.49
  -3   6  15    5.24    3.67
   3  -6 -15    2.67    2.92
  -3   7  15  237.70   17.60
   3  -7 -15  248.10   18.01
  -3   8  15   58.69    5.88
   3  -8 -15   59.42    5.59
  -3   9  15  286.20   20.78
   3  -9 -15  302.60   21.74
  -3  10  15    7.33    3.44
   3 -10 -15    7.35    2.96
  -3  11  15  171.10   12.90
   3 -11 -15  169.30   12.69
  -3  12  15   80.03    7.24
   3 -12 -15   65.69    5.92
  -3  13  15  135.80   10.76
   3 -13 -15  132.70   10.06
   3  17 -14   23.31    3.69
   3  16 -14   89.13    7.38
   3  15 -14   31.84    4.12
   3  14 -14   54.50    5.45
   3  13 -14   -7.34    3.31
   3  12 -14  126.40   10.14
   3  11 -14   12.36    3.50
   3  10 -14  210.90   15.74
   3   9 -14  473.70   33.61
   3   8 -14  509.50   36.13
   3   7 -14  126.80   10.03
  -3  -6  14  462.20   32.94
   3   6 -14  447.90   31.92
  -3  -5  14  105.30    9.02
   3   5 -14  118.70    9.51
  -3  -4  14  222.30   16.68
   3   4 -14  224.70   16.60
  -3  -3  14  273.00   20.05
   3   3 -14  267.50   19.50
  -3  -2  14  140.60   11.14
   3   2 -14  132.90   10.51
  -3  -1  14   45.29    5.60
   3   1 -14   34.90    4.59
  -3   0  14   51.84    5.86
   3   0 -14   52.43    5.53
  -3   1  14   28.14    4.66
   3  -1 -14   32.99    4.64
  -3   2  14  139.50   11.14
   3  -2 -14  141.40   11.15
  -3   3  14  271.50   19.78
   3  -3 -14  274.20   20.03
  -3   4  14  228.00   16.75
   3  -4 -14  161.30   12.35
  -3   5  14  111.30    9.00
   3  -5 -14  117.60    9.36
  -3   6  14  444.20   31.55
   3  -6 -14  446.50   31.67
  -3   7  14  151.60   11.80
   3  -7 -14  136.60   10.61
  -3   8  14  500.20   35.55
   3  -8 -14  471.20   33.39
  -3   9  14  432.20   30.71
   3  -9 -14  438.40   31.12
  -3  10  14  241.50   17.71
   3 -10 -14  156.00   11.99
  -3  11  14   20.36    4.14
   3 -11 -14   17.67    3.72
  -3  12  14  144.10   11.22
   3 -12 -14  135.70   10.58
  -3  13  14   29.80    4.36
   3 -13 -14    0.34    3.19
  -3  14  14   66.53    6.49
   3 -14 -14   72.22    6.39
  -3  15  14   30.58    4.39
   3 -15 -14   31.67    3.95
  -3  16  14   95.15    8.10
   3 -16 -14   99.80    7.93
  -3  17  14    9.16    3.61
   3 -17 -14   35.57    4.12
   3  20 -13    9.32    3.49
   3  19 -13   32.62    4.11
   3  18 -13  196.90   14.69
   3  17 -13   84.77    7.40
   3  16 -13  118.30    9.58
   3  15 -13   35.26    4.68
   3  14 -13   11.31    3.55
   3  13 -13   39.47    4.71
   3  12 -13   28.06    4.34
   3  11 -13   -2.89    3.15
   3  10 -13  144.90   11.35
   3   9 -13   13.61    3.75
   3   8 -13  233.20   17.30
   3   7 -13    5.42    3.31
  -3  -6  13  236.70   17.61
   3   6 -13  216.70   15.96
  -3  -5  13    8.04    4.32
   3   5 -13   10.28    3.40
  -3  -4  13  249.90   18.48
   3   4 -13  275.20   20.10
  -3  -3  13  448.90   32.08
   3   3 -13  457.20   32.59
  -3  -2  13  418.50   29.90
   3   2 -13  428.10   30.59
  -3  -1  13    1.17    3.36
   3   1 -13   -4.47    3.27
  -3   0  13    2.43    3.37
   3   0 -13   -1.88    2.87
  -3   1  13   -0.76    3.44
   3  -1 -13    5.13    3.47
  -3   2  13  438.00   31.24
   3  -2 -13  438.70   31.31
  -3   3  13  437.10   31.19
   3  -3 -13  457.90   32.73
  -3   4  13  252.40   18.70
   3  -4 -13  264.90   19.44
  -3   5  13   16.03    4.30
   3  -5 -13    9.95    3.13
  -3   6  13  223.80   16.82
   3  -6 -13  255.80   18.77
  -3   7  13    2.88    3.53
   3  -7 -13    6.63    3.54
  -3   8  13  264.20   19.44
   3  -8 -13  208.10   15.56
  -3   9  13    9.91    3.86
   3  -9 -13   17.02    3.54
  -3  10  13  163.80   12.44
   3 -10 -13  137.80   10.75
  -3  11  13   -0.79    3.65
   3 -11 -13    2.56    3.22
  -3  12  13   13.25    4.03
   3 -12 -13   21.50    3.92
  -3  13  13   41.18    4.69
   3 -13 -13   50.11    5.36
  -3  14  13   11.20    3.68
   3 -14 -13    7.19    2.82
  -3  15  13   34.93    4.97
   3 -15 -13   38.27    4.08
  -3  16  13  146.00   11.36
   3 -16 -13  132.60   10.31
  -3  17  13   82.83    7.44
   3 -17 -13   67.54    6.16
  -3  18  13  198.40   14.70
   3 -18 -13  192.50   14.34
  -3  19  13   31.36    4.35
   3 -19 -13   32.04    4.20
  -3  20  13   12.01    3.06
   3 -20 -13   11.64    3.61
   3  22 -12  171.50   13.25
   3  21 -12   88.47    8.06
   3  20 -12  117.80   10.17
   3  19 -12   42.75    5.04
   3  18 -12  306.70   22.17
   3  17 -12   68.63    6.56
   3  16 -12   46.40    5.03
   3  15 -12    9.70    3.47
   3  14 -12    0.67    3.36
   3  13 -12   62.31    6.14
   3  12 -12   19.87    3.75
   3  11 -12  400.50   28.71
   3  10 -12   -7.11    3.15
   3   9 -12   37.51    4.68
   3   8 -12  185.40   14.19
  -3  -7  12  190.90   14.50
   3   7 -12  196.40   14.90
  -3  -6  12  119.00    9.92
   3   6 -12  129.20   10.37
  -3  -5  12  596.50   42.32
   3   5 -12  639.20   45.14
  -3  -4  12  652.30   46.14
   3   4 -12  698.80   49.28
  -3  -3  12   -0.29    3.92
   3   3 -12    4.13    3.59
  -3  -2  12  711.90   50.26
   3   2 -12  700.80   49.39
  -3  -1  12   31.14    4.74
   3   1 -12   27.06    4.37
  -3   0  12  516.80   36.85
   3   0 -12  529.40   37.60
  -3   1  12   38.89    5.10
   3  -1 -12   23.06    4.20
  -3   2  12  717.50   50.50
   3  -2 -12  759.00   53.41
  -3   3  12   16.16    4.01
   3  -3 -12   12.80    3.90
  -3   4  12  668.10   47.09
   3  -4 -12  692.40   48.84
  -3   5  12  511.80   36.32
   3  -5 -12  624.20   44.15
  -3   6  12  132.70   10.68
   3  -6 -12  137.60   10.99
  -3   7  12  179.10   13.81
   3  -7 -12  186.30   14.05
  -3   8  12  186.70   14.32
   3  -8 -12  190.80   14.42
  -3   9  12   40.58    5.09
   3  -9 -12   41.90    4.79
  -3  10  12    3.76    3.85
   3 -10 -12    2.56    3.15
  -3  11  12  449.30   32.12
   3 -11 -12  442.90   31.61
  -3  12  12   16.85    4.09
   3 -12 -12   21.25    3.91
  -3  13  12   57.09    5.89
   3 -13 -12   70.40    6.43
  -3  14  12    4.47    3.74
   3 -14 -12   -0.13    3.84
  -3  15  12    5.37    4.32
   3 -15 -12    5.17    3.41
  -3  16  12   63.44    6.38
   3 -16 -12   56.41    5.69
  -3  17  12   69.30    6.63
   3 -17 -12   71.89    6.39
  -3  18  12  261.00   19.18
   3 -18 -12  221.80   16.25
  -3  19  12   47.04    5.16
   3 -19 -12   47.44    4.90
  -3  20  12  113.30    9.18
   3 -20 -12  111.60    8.94
  -3  21  12   79.02    7.02
   3 -21 -12   88.61    7.44
  -3  22  12  176.80   13.28
   3 -22 -12  191.90   14.17
   3  24 -11   -7.59    4.73
   3  23 -11  277.10   20.29
   3  22 -11   11.43    4.83
   3  21 -11  375.00   27.10
   3  20 -11  133.40   11.01
   3  19 -11  608.40   43.10
   3  18 -11   48.00    6.08
   3  17 -11   71.01    7.27
   3  16 -11  137.20   11.55
   3  15 -11  102.70    8.73
   3  14 -11  180.60   13.72
   3  13 -11   11.36    3.56
   3  12 -11  224.60   16.74
   3  11 -11  117.90    9.61
   3  10 -11   76.26    6.76
   3   9 -11    8.83    3.55
   3   8 -11   -1.20    3.36
  -3  -7  11   46.13    5.19
   3   7 -11   38.81    4.80
  -3  -6  11   98.46    8.36
   3   6 -11   88.02    7.70
  -3  -5  11  218.80   16.26
   3   5 -11  241.10   17.83
  -3  -4  11  130.50   10.38
   3   4 -11  137.80   10.99
  -3  -3  11    0.82    3.63
   3   3 -11    3.67    3.51
  -3  -2  11    7.74    3.92
   3   2 -11    4.05    3.40
  -3  -1  11  313.30   22.89
   3   1 -11  304.90   22.28
  -3   0  11    0.73    3.74
   3   0 -11   -0.54    3.25
  -3   1  11  274.90   20.32
   3  -1 -11  302.80   22.16
  -3   2  11   12.26    4.11
   3  -2 -11   15.43    3.96
  -3   3  11    3.80    3.81
   3  -3 -11    9.56    3.82
  -3   4  11  155.30   12.63
   3  -4 -11  146.50   11.49
  -3   5  11  243.60   18.09
   3  -5 -11  220.90   16.50
  -3   6  11  103.00    8.53
   3  -6 -11   80.29    7.38
  -3   7  11   44.71    5.05
   3  -7 -11   46.04    5.07
  -3   8  11    8.30    3.41
   3  -8 -11    4.23    3.58
  -3   9  11   10.19    3.41
   3  -9 -11   11.85    3.32
  -3  10  11   63.68    6.48
   3 -10 -11   78.34    7.10
  -3  11  11  111.70    9.48
   3 -11 -11  124.60    9.96
  -3  12  11  225.80   17.02
   3 -12 -11  204.50   15.41
  -3  13  11   13.79    4.10
   3 -13 -11   15.18    3.25
  -3  14  11  160.10   12.55
   3 -14 -11  166.90   12.78
  -3  15  11   92.03    8.03
   3 -15 -11  101.70    8.55
  -3  16  11  121.40    9.83
   3 -16 -11  110.90    9.08
  -3  17  11   58.57    6.04
   3 -17 -11   67.13    5.97
  -3  18  11   54.53    5.92
   3 -18 -11   54.05    5.42
  -3  19  11  576.60   40.68
   3 -19 -11  603.90   42.52
  -3  20  11   95.68    8.32
   3 -20 -11  117.50    9.43
  -3  21  11  383.10   27.28
   3 -21 -11  377.50   26.96
  -3  22  11   19.72    4.27
   3 -22 -11   11.60    3.55
  -3  23  11  263.50   19.06
   3 -23 -11  259.60   18.85
  -3  24  11    1.35    3.63
   3 -24 -11    3.28    3.20
   3  26 -10   37.27    5.94
   3  25 -10  130.20   10.74
   3  24 -10  123.70   10.50
   3  23 -10   53.85    6.44
   3  22 -10   35.89    5.87
   3  21 -10   94.27    8.65
   3  20 -10  470.60   33.61
   3  19 -10   66.30    7.16
   3  18 -10   72.87    7.59
   3  17 -10  259.00   19.35
   3  16 -10   31.17    5.37
   3  15 -10  221.50   16.77
   3  14 -10    4.25    4.43
   3  13 -10   93.18    8.86
   3  12 -10  355.00   25.62
   3  11 -10  176.40   13.50
   3  10 -10    3.23    3.37
   3   9 -10  430.20   30.79
   3   8 -10    8.90    3.62
  -3  -7  10  537.60   38.20
   3   7 -10  561.10   39.80
  -3  -6  10   19.69    4.47
   3   6 -10   13.39    3.41
  -3  -5  10 1176.00   82.16
   3   5 -10 1229.00   85.86
  -3  -4  10  151.70   11.92
   3   4 -10  166.60   12.92
  -3  -3  10   57.78    6.00
   3   3 -10   52.75    5.67
  -3  -2  10  104.80    8.88
   3   2 -10   98.68    8.39
  -3  -1  10  139.00   11.10
   3   1 -10  146.30   11.49
  -3   0  10  323.20   23.56
   3   0 -10  275.60   20.25
  -3   1  10  129.70   10.63
   3  -1 -10  133.00   10.66
  -3   2  10  104.80    9.05
   3  -2 -10  115.30    9.48
  -3   3  10   61.26    6.37
   3  -3 -10   58.40    6.04
  -3   4  10  164.80   12.89
   3  -4 -10  154.40   11.99
  -3   5  10 1183.00   82.74
   3  -5 -10  719.80   50.74
  -3   6  10   15.09    4.15
   3  -6 -10   12.53    3.85
  -3   7  10  520.20   36.93
   3  -7 -10  445.60   31.83
  -3   8  10    8.37    3.60
   3  -8 -10    1.50    2.99
  -3   9  10  432.40   30.90
   3  -9 -10  456.00   32.54
  -3  10  10    0.69    3.46
   3 -10 -10    3.70    3.42
  -3  11  10  157.00   12.24
   3 -11 -10  186.10   14.12
  -3  12  10  330.90   24.01
   3 -12 -10  364.90   26.38
  -3  13  10   78.97    7.51
   3 -13 -10   79.82    7.20
  -3  14  10    3.88    3.68
   3 -14 -10    2.67    3.61
  -3  15  10  204.90   15.59
   3 -15 -10  207.00   15.45
  -3  16  10   21.70    4.47
   3 -16 -10   42.69    5.04
  -3  17  10  251.20   18.49
   3 -17 -10  252.70   18.62
  -3  18  10   66.61    6.56
   3 -18 -10   68.07    6.50
  -3  19  10   73.33    6.80
   3 -19 -10   60.75    5.79
  -3  20  10  491.10   34.89
   3 -20 -10  488.30   34.58
  -3  21  10   90.78    7.81
   3 -21 -10  101.40    8.20
  -3  22  10   26.23    4.10
   3 -22 -10   30.07    3.90
  -3  23  10   58.40    5.85
   3 -23 -10   55.53    5.25
  -3  24  10  130.20   10.29
   3 -24 -10  115.20    9.15
  -3  25  10  124.40    9.93
   3 -25 -10  129.90    9.94
  -3  26  10   43.33    4.66
   3 -26 -10   36.54    4.28
   3  27  -9    7.43    5.06
   3  27  -9    2.38    2.92
   3  26  -9  157.10   12.45
   3  25  -9   14.05    5.02
   3  24  -9    7.69    5.19
   3  23  -9   63.93    7.02
   3  22  -9  143.80   11.80
   3  21  -9    8.87    4.77
   3  20  -9   14.56    5.13
   3  19  -9  237.20   17.91
   3  18  -9  209.30   15.94
   3  17  -9  784.20   55.15
   3  16  -9   92.93    8.60
   3  15  -9   27.65    5.29
   3  14  -9   13.53    4.68
   3  13  -9   28.54    5.20
   3  12  -9  262.50   19.60
   3  11  -9  241.70   18.11
   3  10  -9  644.70   45.55
   3   9  -9  215.70   16.14
   3   8  -9  143.80   11.32
  -3  -7   9  217.00   16.43
   3   7  -9  218.50   16.51
  -3  -6   9 1584.00  110.40
   3   6  -9 1602.00  111.60
  -3  -5   9  321.30   23.40
   3   5  -9  341.90   24.81
  -3  -4   9  416.20   29.74
   3   4  -9  468.90   33.52
  -3  -3   9  250.60   18.52
   3   3  -9  275.70   20.28
  -3  -2   9   54.48    5.89
   3   2  -9   60.14    6.15
  -3  -1   9   98.35    8.34
   3   1  -9   98.87    8.52
  -3   0   9   -0.60    3.86
   3   0  -9   -2.64    3.61
  -3   1   9   92.61    8.44
   3  -1  -9   84.45    7.68
  -3   2   9   54.94    6.11
   3  -2  -9   59.13    6.13
  -3   3   9  235.30   17.73
   3  -3  -9  262.20   19.33
  -3   4   9  414.90   29.95
   3  -4  -9  438.70   31.32
  -3   5   9  303.80   22.25
   3  -5  -9  289.10   21.09
  -3   6   9 1486.00  103.70
   3  -6  -9 1583.00  110.20
  -3   7   9  219.40   16.53
   3  -7  -9  219.40   16.30
  -3   8   9  123.00   10.31
   3  -8  -9  140.10   10.95
  -3   9   9  157.80   12.48
   3  -9  -9  223.20   16.58
  -3  10   9  613.90   43.43
   3 -10  -9  634.00   44.81
  -3  11   9  230.00   17.13
   3 -11  -9  255.80   18.94
  -3  12   9  247.80   18.22
   3 -12  -9  258.50   19.07
  -3  13   9   23.67    4.53
   3 -13  -9   20.58    3.96
  -3  14   9   11.61    3.86
   3 -14  -9    9.61    3.67
  -3  15   9   27.05    4.51
   3 -15  -9   34.26    4.77
  -3  16   9  105.80    9.12
   3 -16  -9   81.70    7.19
  -3  17   9  851.30   59.86
   3 -17  -9  767.00   53.97
  -3  18   9  154.80   12.16
   3 -18  -9  205.20   15.43
  -3  19   9  205.00   15.35
   3 -19  -9  196.70   14.75
  -3  20   9    6.57    3.85
   3 -20  -9    6.64    3.11
  -3  21   9    5.63    3.80
   3 -21  -9    5.58    2.90
  -3  22   9  151.70   11.87
   3 -22  -9  138.30   10.68
  -3  23   9   26.81    4.13
   3 -23  -9   57.67    5.81
  -3  24   9   11.11    3.68
   3 -24  -9   15.55    3.33
  -3  25   9   21.95    4.32
   3 -25  -9   21.00    3.55
  -3  26   9  161.00   12.25
   3 -26  -9  172.10   12.88
  -3  27   9    1.79    3.68
   3 -27  -9    6.80    3.26
   3  28  -8   -0.74    3.08
   3  28  -8    0.47    4.60
   3  27  -8    6.73    4.69
   3  27  -8    8.63    3.25
   3  26  -8    0.46    4.46
   3  26  -8    3.55    2.76
   3  25  -8   21.48    5.25
   3  24  -8    2.56    4.60
   3  23  -8   15.14    4.85
   3  22  -8  176.90   13.85
   3  21  -8   23.54    5.43
   3  20  -8   10.70    5.21
   3  19  -8  109.50    9.48
   3  18  -8  375.80   27.20
   3  17  -8  513.50   36.64
   3  16  -8  371.40   27.01
   3  15  -8  140.70   11.84
   3  14  -8   83.07    8.24
   3  13  -8  190.00   14.65
   3  12  -8 1268.00   88.59
   3  11  -8  142.90   11.50
   3  10  -8  785.30   55.25
   3   9  -8 1237.00   86.40
   3   8  -8  849.30   59.63
  -3  -7   8 1982.00  137.90
   3   7  -8 1830.00  127.30
  -3  -6   8  256.50   19.06
   3   6  -8  244.60   18.05
  -3  -5   8    7.75    4.16
   3   5  -8    4.16    3.31
  -3  -4   8   33.65    4.96
   3   4  -8   30.60    4.06
  -3  -3   8   15.24    4.12
   3   3  -8   15.01    3.71
  -3  -2   8  249.50   18.43
   3   2  -8  258.40   19.06
  -3  -1   8  136.20   10.81
   3   1  -8  131.80   10.46
  -3   0   8 1847.00  128.40
   3   0  -8 2009.00  139.60
  -3   1   8  136.80   10.92
   3  -1  -8  131.80   10.49
  -3   2   8  242.90   18.09
   3  -2  -8  189.90   14.42
  -3   3   8   17.87    3.72
   3  -3  -8   18.85    3.65
  -3   4   8   27.70    4.79
   3  -4  -8   29.66    4.49
  -3   5   8   14.72    4.30
   3  -5  -8    9.04    3.34
  -3   6   8  241.70   18.06
   3  -6  -8  242.00   18.00
  -3   7   8 1888.00  131.40
   3  -7  -8 1890.00  131.40
  -3   8   8  854.80   60.10
   3  -8  -8  865.40   60.75
  -3   9   8 1200.00   83.93
   3  -9  -8 1224.00   85.44
  -3  10   8  683.70   48.34
   3 -10  -8  775.80   54.53
  -3  11   8  139.50   11.26
   3 -11  -8  163.80   12.67
  -3  12   8 1354.00   94.41
   3 -12  -8 1272.00   88.84
  -3  13   8  199.60   15.10
   3 -13  -8  193.10   14.63
  -3  14   8   60.00    6.11
   3 -14  -8   54.35    5.84
  -3  15   8  158.00   12.36
   3 -15  -8  117.00    9.58
  -3  16   8  357.20   25.87
   3 -16  -8  378.10   27.31
  -3  17   8  502.60   35.86
   3 -17  -8  479.90   34.24
  -3  18   8  392.00   28.32
   3 -18  -8  359.50   25.87
  -3  19   8  118.10    9.93
   3 -19  -8  104.00    8.77
  -3  20   8   12.20    3.99
   3 -20  -8   13.12    3.78
  -3  21   8   26.24    4.28
   3 -21  -8   31.60    4.50
  -3  22   8  188.70   14.32
   3 -22  -8  167.80   12.90
  -3  23   8   17.71    4.35
   3 -23  -8   34.17    4.63
  -3  24   8    0.53    3.46
   3 -24  -8    0.54    3.30
  -3  25   8   26.01    4.27
   3 -25  -8   33.50    4.31
  -3  26   8    1.05    3.07
   3 -26  -8    3.33    2.92
  -3  27   8    7.53    3.20
   3 -27  -8    5.66    3.13
  -3  28   8   -2.24    3.31
   3 -28  -8    0.57    3.17
   3  29  -7  101.80    9.13
   3  29  -7   97.22    8.18
   3  28  -7   -1.56    5.04
   3  28  -7    8.13    3.71
   3  27  -7   43.19    6.09
   3  27  -7   54.63    5.62
   3  26  -7   -4.24    4.69
   3  26  -7    8.40    3.27
   3  25  -7   53.89    6.65
   3  25  -7   68.27    6.28
   3  24  -7    6.43    4.86
   3  23  -7   59.17    7.08
   3  22  -7   72.53    7.62
   3  21  -7   45.71    5.87
   3  20  -7   23.11    5.04
   3  19  -7  267.90   19.97
   3  18  -7   29.15    4.97
   3  17  -7   22.92    4.89
   3  16  -7    9.75    4.16
   3  15  -7  312.40   22.91
   3  14  -7  423.50   30.47
   3  13  -7 1687.00  117.40
   3  12  -7   70.17    6.90
   3  11  -7 1595.00  111.00
   3  10  -7  907.10   63.56
   3   9  -7  109.70    9.13
   3   8  -7  983.00   68.80
   3   7  -7  448.90   31.97
  -3  -6   7  127.40   10.46
   3   6  -7  111.50    9.15
  -3  -5   7   59.04    6.29
   3   5  -7   56.86    5.65
  -3  -4   7    3.28    4.06
   3   4  -7   -0.04    3.27
  -3  -3   7  488.90   34.78
   3   3  -7  465.40   33.07
  -3  -2   7    2.89    3.92
   3   2  -7   -3.37    3.46
  -3  -1   7  930.80   65.18
   3   1  -7  985.70   68.93
  -3   0   7    1.80    3.70
   3   0  -7    0.29    3.09
  -3   1   7  939.80   65.83
   3  -1  -7  999.10   69.86
  -3   2   7    0.20    3.58
   3  -2  -7    2.76    3.21
  -3   3   7  454.20   32.39
   3  -3  -7  468.90   33.34
  -3   4   7    7.41    3.93
   3  -4  -7    0.32    2.81
  -3   5   7   50.45    5.43
   3  -5  -7   51.47    5.49
  -3   6   7  119.40    9.81
   3  -6  -7  122.70   10.04
  -3   7   7  455.30   32.60
   3  -7  -7  438.50   31.27
  -3   8   7  986.00   69.16
   3  -8  -7  945.30   66.22
  -3   9   7  109.60    9.27
   3  -9  -7  104.70    8.94
  -3  10   7  967.90   67.81
   3 -10  -7  931.60   65.34
  -3  11   7 1559.00  108.60
   3 -11  -7 1542.00  107.50
  -3  12   7   80.66    7.47
   3 -12  -7   70.87    6.91
  -3  13   7 1916.00  133.20
   3 -13  -7 1769.00  123.10
  -3  14   7  487.50   34.76
   3 -14  -7  414.00   29.68
  -3  15   7  306.60   22.31
   3 -15  -7  312.50   22.77
  -3  16   7   -0.92    3.51
   3 -16  -7    6.02    3.77
  -3  17   7   14.92    4.11
   3 -17  -7   22.59    3.96
  -3  18   7   20.48    4.30
   3 -18  -7   19.56    3.76
  -3  19   7  278.10   20.46
   3 -19  -7  177.80   13.66
  -3  20   7   20.51    4.60
   3 -20  -7    7.23    3.72
  -3  21   7   16.35    3.98
   3 -21  -7   42.65    5.10
  -3  22   7   64.68    6.03
   3 -22  -7   77.42    7.07
  -3  23   7   65.57    6.47
   3 -23  -7   64.44    6.18
  -3  24   7    9.50    3.97
   3 -24  -7   10.66    3.12
  -3  25   7   66.66    6.42
   3 -25  -7   72.74    6.63
  -3  26   7   15.29    4.21
   3 -26  -7    6.60    3.45
  -3  27   7   49.81    5.38
   3 -27  -7   56.08    5.36
  -3  28   7    6.54    3.64
  -3  29   7  117.80    9.36
   3  30  -6    2.40    5.29
   3  30  -6   12.28    3.71
   3  29  -6   64.62    6.23
   3  29  -6   54.87    6.66
   3  28  -6   81.63    8.11
   3  28  -6   78.19    6.97
   3  27  -6    5.92    5.05
   3  27  -6    4.66    3.15
   3  26  -6   97.93    9.03
   3  26  -6   96.09    8.05
   3  25  -6    5.09    4.88
   3  25  -6    8.01    3.59
   3  24  -6  165.70   13.22
   3  24  -6  167.50   12.92
   3  23  -6   82.78    8.18
   3  23  -6   92.38    8.06
   3  22  -6  140.80   11.53
   3  21  -6   -6.49    4.45
   3  20  -6   48.81    6.22
   3  19  -6  779.00   54.89
   3  18  -6   29.95    5.51
   3  17  -6  246.10   18.50
   3  16  -6  719.60   50.88
   3  15  -6  108.10    9.39
   3  14  -6 3046.00  211.30
   3  13  -6 1054.00   73.73
   3  12  -6 1388.00   96.73
   3  11  -6    5.23    3.67
   3  10  -6 1550.00  107.80
   3   9  -6  364.70   26.20
   3   8  -6 3387.00  234.70
   3   7  -6  264.70   19.41
  -3  -6   6  827.40   57.98
   3   6  -6 1008.00   70.67
  -3  -5   6  332.00   23.94
   3   5  -6  332.50   23.95
  -3  -4   6  593.50   41.80
   3   4  -6  611.00   43.06
  -3  -3   6   93.25    7.92
   3   3  -6   89.71    7.47
  -3  -2   6  331.40   23.76
   3   2  -6  337.00   24.21
  -3  -1   6  737.40   51.70
   3   1  -6  729.30   51.16
  -3   0   6 2036.00  141.30
   3   0  -6 2094.00  145.30
  -3   1   6  731.80   51.33
   3  -1  -6  632.70   44.53
  -3   2   6  346.20   24.89
   3  -2  -6  337.80   24.30
  -3   3   6   58.55    5.86
   3  -3  -6   90.34    7.52
  -3   4   6  592.90   41.86
   3  -4  -6  593.20   41.87
  -3   5   6  303.40   22.12
   3  -5  -6  319.10   23.10
  -3   6   6  798.60   56.11
   3  -6  -6  718.40   50.52
  -3   7   6  286.60   20.93
   3  -7  -6  276.60   20.19
  -3   8   6 3423.00  237.30
   3  -8  -6 3411.00  236.40
  -3   9   6  443.90   31.74
   3  -9  -6  413.20   29.51
  -3  10   6 1620.00  112.90
   3 -10  -6 1542.00  107.30
  -3  11   6    5.03    3.92
   3 -11  -6    5.85    3.76
  -3  12   6 1516.00  105.60
   3 -12  -6 1535.00  106.90
  -3  13   6 1086.00   75.99
   3 -13  -6 1116.00   77.99
  -3  14   6 3119.00  216.30
   3 -14  -6 2969.00  206.00
  -3  15   6   91.81    8.11
   3 -15  -6  112.80    9.22
  -3  16   6  697.40   49.17
   3 -16  -6  611.20   43.25
  -3  17   6  256.20   18.87
   3 -17  -6  239.40   17.99
  -3  18   6   39.79    4.77
   3 -18  -6   31.20    4.64
  -3  19   6  764.80   53.83
   3 -19  -6  777.20   54.71
  -3  20   6   39.56    5.24
   3 -20  -6   50.78    5.67
  -3  21   6    5.31    3.44
   3 -21  -6   -0.12    3.47
  -3  22   6  134.60   10.89
   3 -22  -6  132.00   10.64
  -3  23   6   98.73    8.44
   3 -23  -6   89.40    7.80
  -3  24   6  196.10   14.77
   3 -24  -6  168.20   12.78
  -3  25   6    4.51    3.79
   3 -25  -6    6.38    3.19
  -3  26   6  100.60    8.29
  -3  27   6    8.76    3.44
  -3  28   6   93.93    7.94
  -3  29   6   67.12    6.33
  -3  30   6   10.64    3.51
   3  31  -5   19.47    3.81
   3  30  -5  132.30   10.48
   3  29  -5   83.01    7.32
   3  28  -5  283.10   20.56
   3  27  -5    1.40    3.59
   3  26  -5  335.40   24.22
   3  25  -5    0.69    3.72
   3  24  -5    1.98    3.58
   3  23  -5    3.54    3.81
   3  22  -5    8.11    4.03
   3  21  -5  190.00   14.50
   3  17  -5   78.32    7.42
   3  16  -5   60.23    6.62
   3  15  -5  668.80   47.25
   3  14  -5  218.20   16.38
   3  13  -5  222.30   16.59
   3  12  -5  314.80   22.75
   3  11  -5  625.00   44.01
   3  10  -5  570.70   40.32
   3   9  -5 1742.00  121.10
   3   8  -5 1582.00  110.00
   3   7  -5   40.95    5.02
   3   6  -5 1839.00  127.70
  -3  -5   5 1556.00  108.10
   3   5  -5 1851.00  128.70
  -3  -4   5   14.00    3.84
   3   4  -5    3.70    2.88
  -3  -3   5  401.30   28.53
   3   3  -5  383.40   27.27
  -3  -2   5  754.40   52.84
   3   2  -5  773.10   54.10
  -3  -1   5 2672.00  185.20
   3   1  -5 3169.00  219.50
  -3   0   5    1.61    2.99
   3   0  -5    2.29    2.87
  -3   1   5 3248.00  225.10
   3  -1  -5 3315.00  229.60
  -3   2   5  756.50   53.11
   3  -2  -5  750.30   52.54
  -3   3   5  390.10   27.99
   3  -3  -5  383.50   27.33
  -3   4   5    3.86    3.35
   3  -4  -5    5.72    3.20
  -3   5   5 1671.00  116.30
   3  -5  -5 1504.00  104.60
  -3   6   5 1831.00  127.20
   3  -6  -5 1800.00  125.10
  -3   7   5   38.16    4.81
   3  -7  -5   35.60    4.22
  -3   8   5 1607.00  111.90
   3  -8  -5 1621.00  112.80
  -3   9   5 1844.00  128.30
   3  -9  -5 1954.00  135.80
  -3  10   5  609.40   43.16
   3 -10  -5  576.10   40.75
  -3  11   5  622.50   44.02
   3 -11  -5  587.40   41.50
  -3  12   5  335.90   24.40
   3 -12  -5  322.30   23.29
  -3  13   5  244.40   18.11
   3 -13  -5  240.80   17.88
  -3  14   5  210.90   15.80
   3 -14  -5  183.40   13.94
  -3  15   5  713.80   50.23
   3 -15  -5  749.90   52.88
  -3  16   5   44.45    5.34
   3 -16  -5   52.01    5.62
  -3  17   5   68.41    6.68
   3 -17  -5   63.23    6.21
  -3  18   5  225.20   16.75
   3 -18  -5  231.90   17.26
  -3  19   5   28.92    3.89
   3 -19  -5   27.63    4.44
  -3  20   5  380.60   27.42
   3 -20  -5  390.50   28.16
  -3  21   5  200.70   15.28
   3 -21  -5  191.70   14.65
  -3  22   5   12.07    4.37
   3 -22  -5   16.07    4.02
  -3  23   5    8.75    4.07
   3 -23  -5    5.47    3.06
  -3  24   5    0.25    3.56
  -3  25   5    5.46    2.84
  -3  26   5  328.20   23.76
  -3  27   5    7.82    3.73
  -3  28   5  289.40   21.01
  -3  29   5   74.55    6.99
  -3  30   5  119.70    9.44
  -3  31   5   24.50    4.18
   3  31  -4   10.30    3.91
   3  30  -4   24.23    4.06
   3  29  -4    3.03    3.64
   3  28  -4    3.52    3.15
   3  27  -4    9.82    3.75
   3  26  -4    8.00    3.98
   3  25  -4   35.71    4.78
   3  24  -4  404.60   29.04
   3  23  -4   -1.11    3.29
   3  22  -4  177.40   13.53
   3  21  -4  518.10   36.86
   3  20  -4   23.27    4.39
   3  19  -4   51.52    5.73
   3  11  -4    4.36    3.61
   3  10  -4  785.70   55.08
   3   9  -4 1791.00  124.40
   3   8  -4  556.00   39.18
   3   7  -4  183.40   13.70
   3   6  -4  389.20   27.65
   3   5  -4  543.90   38.20
  -3  -4   4  746.10   52.08
   3   4  -4  777.10   54.25
  -3  -3   4  530.70   37.26
   3   3  -4  532.00   37.34
  -3  -2   4 1302.00   90.52
   3   2  -4 1364.00   94.77
  -3  -1   4   10.13    3.06
   3   1  -4   13.99    3.22
  -3   0   4    2.38    2.79
   3   0  -4    7.10    2.74
  -3   1   4   12.37    3.32
   3  -1  -4   19.71    3.30
  -3   2   4 1321.00   91.88
   3  -2  -4 1246.00   86.65
  -3   3   4  522.60   36.83
   3  -3  -4  561.10   39.38
  -3   4   4  755.60   52.94
   3  -4  -4  676.40   47.42
  -3   5   4  517.50   36.64
   3  -5  -4  522.70   36.88
  -3   6   4  498.90   35.44
   3  -6  -4  348.60   24.89
  -3   7   4  173.50   13.26
   3  -7  -4  195.10   14.49
  -3   8   4  456.20   32.47
   3  -8  -4  514.00   36.36
  -3   9   4 1888.00  131.20
   3  -9  -4 1778.00  123.60
  -3  10   4  745.80   52.53
   3 -10  -4  778.30   54.63
  -3  11   4    4.21    2.95
   3 -11  -4    3.47    3.58
  -3  12   4    7.19    3.65
   3 -12  -4   10.76    3.20
  -3  13   4 1024.00   71.72
   3 -13  -4  999.90   69.96
  -3  14   4   -1.93    3.04
   3 -14  -4   -4.15    3.53
  -3  15   4   91.83    8.09
   3 -15  -4   89.78    7.89
  -3  16   4   75.77    7.16
   3 -16  -4   78.90    7.16
  -3  17   4  106.70    9.09
   3 -17  -4  100.30    8.52
  -3  18   4   91.97    8.08
   3 -18  -4  101.00    8.69
  -3  19   4   57.89    5.79
   3 -19  -4   60.71    6.27
  -3  20   4   32.94    4.31
   3 -20  -4   24.65    3.93
  -3  21   4  486.10   34.61
  -3  22   4  156.90   12.29
  -3  23   4   -2.24    3.90
  -3  24   4  417.20   29.86
  -3  25   4   46.17    5.33
  -3  26   4    0.36    3.66
  -3  27   4   15.37    3.56
  -3  28   4    2.43    3.45
  -3  29   4    2.06    2.93
  -3  30   4   25.89    4.45
  -3  31   4    2.55    3.52
   3  31  -3   38.52    5.13
   3  30  -3   54.15    5.91
   3  29  -3   36.44    4.92
   3  28  -3    5.21    3.58
   3  27  -3  283.10   20.53
   3  26  -3    8.66    3.66
   3  25  -3  757.90   53.22
   3  24  -3  159.70   12.52
   3  23  -3  904.30   63.47
   3  22  -3    2.65    4.04
   3  21  -3 2759.00  191.50
   3  20  -3  127.60   10.23
   3  19  -3  323.60   23.52
   3  18  -3  328.20   23.82
   3  17  -3  112.50    9.25
   3  16  -3  834.20   58.48
   3   8  -3  440.10   31.15
   3   7  -3    9.48    3.04
   3   6  -3  134.80   10.25
   3   5  -3 1947.00  135.00
  -3  -4   3 1376.00   95.55
   3   4  -3 1240.00   86.14
  -3  -3   3 3863.00  267.20
   3   3  -3 3925.00  271.60
  -3  -2   3 1009.00   70.12
   3   2  -3 1086.00   75.49
  -3  -1   3 4660.00  322.30
   3   1  -3 4874.00  337.10
  -3   0   3    2.47    2.75
   3   0  -3   -0.13    2.60
  -3   1   3 4741.00  328.00
   3  -1  -3 4709.00  325.70
  -3   2   3 1050.00   73.14
   3  -2  -3 1014.00   70.53
  -3   3   3 3858.00  267.10
   3  -3  -3 3643.00  252.20
  -3   4   3 1281.00   89.14
   3  -4  -3 1293.00   89.87
  -3   5   3 1977.00  137.20
   3  -5  -3 1943.00  134.70
  -3   6   3  130.20   10.03
   3  -6  -3  107.40    8.49
  -3   7   3    5.46    3.21
   3  -7  -3    7.23    3.14
  -3   8   3  462.30   32.87
   3  -8  -3  467.10   33.04
  -3   9   3   43.30    4.75
   3  -9  -3   39.57    4.54
  -3  10   3    2.85    3.50
   3 -10  -3    3.47    3.43
  -3  11   3   54.69    5.91
   3 -11  -3   75.32    6.67
  -3  12   3  384.30   27.68
   3 -12  -3  318.80   23.06
  -3  13   3  150.20   11.64
   3 -13  -3  153.90   11.83
  -3  14   3  158.70   12.68
   3 -14  -3  147.20   11.38
  -3  15   3   45.66    5.27
   3 -15  -3   45.02    4.90
  -3  16   3  671.90   47.43
   3 -16  -3  782.30   55.02
  -3  17   3  110.90    9.09
   3 -17  -3  126.40   10.30
  -3  18   3  237.00   17.68
  -3  19   3  316.90   23.08
  -3  20   3  111.80    9.54
  -3  21   3 2466.00  171.20
  -3  22   3   -4.26    3.33
  -3  23   3  899.70   63.17
  -3  24   3  170.80   13.18
  -3  25   3  564.90   40.05
  -3  26   3   10.49    3.41
  -3  27   3  366.10   26.37
  -3  28   3   -4.54    3.30
  -3  29   3   47.78    5.24
  -3  30   3   47.46    5.40
  -3  31   3   48.06    5.07
   3  32  -2   20.50    4.07
   3  31  -2    5.05    3.62
   3  30  -2    3.81    3.65
   3  29  -2    0.12    3.06
   3  28  -2  154.80   11.94
   3  27  -2    5.36    3.77
   3  26  -2  741.30   52.06
   3  25  -2   20.80    4.34
   3  24  -2  173.50   13.36
   3  23  -2  174.40   13.40
   3  22  -2  832.20   58.51
   3  21  -2  416.30   29.86
   3  20  -2  466.70   33.32
   3  19  -2  193.30   14.61
   3  18  -2   33.21    4.54
   3  17  -2   94.18    7.95
   3  16  -2  143.50   11.16
   3  15  -2   93.73    7.87
   3  14  -2  520.60   36.79
   3  13  -2  126.80    9.90
   3  12  -2  516.70   36.46
   3  11  -2   65.33    5.81
   3   5  -2 1143.00   79.38
   3   4  -2  150.90   10.97
   3   3  -2   19.14    2.49
  -3  -2   2 3846.00  266.00
  -3  -1   2  295.30   20.78
   3   1  -2  302.40   21.26
  -3   0   2 3605.00  249.40
  -3   1   2  332.50   23.44
   3  -1  -2  297.50   21.02
  -3   2   2 5088.00  351.90
  -3   3   2   19.51    3.11
   3  -3  -2   15.66    2.87
  -3   4   2  147.10   11.07
   3  -4  -2  142.20   10.63
  -3   5   2 1148.00   79.90
   3  -5  -2 1220.00   84.81
  -3   6   2  606.80   42.58
   3  -6  -2  594.90   41.73
  -3   7   2  722.00   50.57
   3  -7  -2  686.10   48.08
  -3   8   2  182.70   13.80
   3  -8  -2  181.70   13.54
  -3   9   2  189.90   14.33
   3  -9  -2  248.80   18.12
  -3  10   2 6130.00  424.10
   3 -10  -2 5450.00  377.10
  -3  11   2   66.43    6.35
   3 -11  -2   62.77    6.15
  -3  12   2  559.10   39.61
   3 -12  -2  549.80   38.92
  -3  13   2  119.20    9.64
   3 -13  -2  111.10    9.12
  -3  14   2  488.80   34.77
  -3  15   2   80.25    7.33
  -3  16   2  141.00   11.18
  -3  17   2   70.62    7.05
  -3  18   2   35.59    4.93
  -3  19   2  165.90   12.99
  -3  20   2  516.50   36.70
  -3  21   2  415.80   29.80
  -3  22   2  871.40   61.06
  -3  23   2  159.30   12.50
  -3  24   2  140.60   11.11
  -3  25   2   27.73    4.71
  -3  26   2  735.20   51.73
  -3  27   2    0.35    3.22
  -3  28   2  143.40   11.20
  -3  29   2    5.12    3.74
  -3  30   2    2.57    3.64
  -3  31   2    2.94    3.59
  -3  32   2   21.29    4.02
   3  32  -1  164.00   12.43
   3  31  -1   51.61    5.18
   3  30  -1   35.95    4.69
   3  29  -1   27.72    4.38
   3  28  -1  138.20   11.01
   3  27  -1  254.40   18.79
   3  26  -1   94.75    8.17
   3  25  -1  466.80   33.25
   3  24  -1   73.39    6.98
   3  23  -1  550.20   39.02
   3  22  -1   26.40    4.53
   3  21  -1   86.06    7.76
   3  20  -1  171.90   13.28
   3  19  -1   29.85    4.37
   3  18  -1  183.00   13.82
   3  17  -1   18.28    3.58
   3  16  -1  928.30   64.93
   3  15  -1  332.40   23.83
   3  14  -1   94.07    7.67
   3  13  -1    7.18    3.10
   3  12  -1  657.30   46.11
   3  11  -1   74.43    6.37
   3  10  -1   17.64    3.07
   3   9  -1  313.90   22.32
   3   8  -1  820.40   57.14
   3   7  -1  776.30   54.04
   3   6  -1  566.60   39.51
   3   5  -1    2.41    1.71
   3   4  -1 1507.00  104.40
   3   3  -1   18.27    1.75
   3   3  -1   17.35    1.81
   3   2  -1   76.51    5.45
  -3  -1   1 1167.00   81.03
   3   1  -1 1411.00   97.97
  -3   0   1    1.54    1.33
   3   0  -1    1.56    1.50
  -3   1   1 1374.00   95.20
   3  -1  -1 1226.00   84.98
  -3   2   1   80.45    6.25
   3  -2  -1   44.80    4.15
  -3   3   1   20.17    2.98
   3  -3  -1   12.26    2.66
  -3   4   1 1836.00  127.30
   3  -4  -1 1941.00  134.60
  -3   5   1    0.98    2.82
   3  -5  -1   -2.74    2.52
  -3   6   1  546.30   38.45
  -3   7   1  769.70   53.81
  -3   8   1  849.00   59.44
  -3   9   1  370.50   26.57
  -3  10   1   16.83    3.80
  -3  11   1   96.62    8.03
  -3  12   1  662.60   46.71
  -3  13   1   -0.19    3.51
  -3  14   1   85.21    7.36
  -3  15   1  351.40   25.47
  -3  16   1 1072.00   74.98
  -3  17   1   21.70    4.17
  -3  18   1  183.00   14.22
  -3  19   1   38.98    5.39
  -3  20   1  171.10   13.22
  -3  21   1   97.65    8.39
  -3  22   1   22.43    4.47
  -3  23   1  552.20   39.12
  -3  24   1   71.86    6.82
  -3  25   1  457.80   32.62
  -3  26   1   83.17    7.17
  -3  27   1  242.60   17.73
  -3  28   1  143.30   11.28
  -3  29   1   29.01    4.33
  -3  30   1   24.70    4.33
  -3  31   1   45.02    5.16
  -3  32   1  148.00   11.21
   3  32   0   22.00    4.33
   3  31   0   23.24    4.35
   3  30   0  249.00   18.34
   3  29   0   37.45    5.08
   3  28   0   12.22    4.31
   3  27   0  151.50   11.78
   3  26   0    1.88    3.14
   3  25   0    7.24    3.18
   3  24   0  821.90   57.74
   3  23   0   77.84    7.29
   3  22   0   35.50    4.77
   3  21   0  167.10   12.80
   3  20   0   14.50    3.95
   3  19   0  232.50   17.21
   3  18   0  234.60   17.33
   3  17   0    5.88    3.14
   3  16   0  346.20   24.85
   3  15   0  315.50   22.70
   3  14   0  289.30   20.82
   3  13   0  428.70   30.35
   3  12   0  426.00   30.12
   3  11   0   64.04    5.62
   3  10   0 2962.00  205.10
   3   9   0  757.90   52.84
   3   8   0    7.99    2.12
   3   7   0  263.00   18.63
   3   6   0 1143.00   79.32
  -3  -4   0 1603.00  111.10
   3   4   0 1381.00   95.64
  -3  -3   0  224.00   15.66
   3   3   0  234.60   16.41
  -3  -2   0  191.20   13.42
  -3  -1   0   19.07    1.74
  -3   0   0 2444.00  169.20
  -3   3   0  217.40   15.57
  -3   4   0 1250.00   86.87
  -3   5   0 4308.00  298.10
  -3   6   0 1009.00   70.27
  -3   7   0  247.40   17.89
  -3   8   0    8.86    3.33
  -3   9   0  795.10   55.66
  -3  10   0 2784.00  193.00
  -3  11   0   68.26    6.32
  -3  12   0  389.40   27.95
  -3  13   0  442.80   31.51
  -3  14   0  115.90    9.50
  -3  15   0  353.10   25.54
  -3  16   0  324.50   23.59
  -3  17   0   10.69    4.07
  -3  18   0  225.90   17.09
  -3  19   0  209.00   15.93
  -3  20   0   25.23    4.71
  -3  21   0  179.10   13.94
  -3  22   0   31.03    4.98
  -3  23   0   74.99    7.11
  -3  24   0  867.70   60.79
  -3  25   0    2.98    3.75
  -3  26   0   -0.62    3.84
  -3  27   0  132.10   10.41
  -3  28   0   13.71    3.80
  -3  29   0   36.83    4.38
  -3  30   0  217.00   16.00
  -3  31   0   12.94    2.88
  -3  32   0   11.38    2.53
   3  31   1   44.11    4.99
   3  30   1   -1.98    3.42
   3  29   1  131.60   10.49
   3  28   1   43.15    5.08
   3  27   1   37.23    4.88
   3  26   1    6.69    3.74
   3  25   1   38.29    4.75
   3  24   1    7.91    3.64
   3  23   1   50.81    5.58
   3  22   1   -0.36    3.64
   3  21   1  161.70   12.55
   3  20   1  139.10   10.98
   3  19   1   56.84    5.85
   3  18   1  908.00   63.61
   3  17   1   -1.39    3.14
   3  16   1   84.76    7.36
   3  15   1  724.10   50.81
   3  14   1   12.32    3.06
   3  13   1  496.00   35.00
  -3 -12  -1  264.60   19.03
   3  12   1  246.00   17.79
  -3 -11  -1 1341.00   93.25
   3  11   1 1222.00   84.98
  -3 -10  -1   27.67    3.52
   3  10   1   20.51    2.97
  -3  -9  -1 4331.00  299.60
   3   9   1 3873.00  268.00
  -3  -8  -1 1113.00   77.32
   3   8   1 1195.00   83.01
  -3  -7  -1    2.41    2.11
   3   7   1    6.35    2.24
  -3  -6  -1  172.00   12.40
   3   6   1  169.30   12.23
  -3  -5  -1  193.20   13.77
   3   5   1  198.80   14.17
  -3  -4  -1  232.20   16.40
   3   4   1  173.10   12.39
  -3  -3  -1   20.27    2.32
   3   3   1   19.71    2.30
  -3  -2  -1  960.40   66.64
   3   2   1 1039.00   72.04
  -3  -1  -1   19.03    2.35
   3   1   1   19.89    2.60
  -3   0  -1   -1.94    2.06
  -3   1  -1   17.87    2.66
  -3   2  -1  860.60   59.92
  -3  11  -1 1240.00   86.39
  -3  12  -1  263.70   19.28
  -3  13  -1  509.50   36.03
  -3  14  -1   13.05    3.68
  -3  15  -1  771.00   54.15
  -3  16  -1   71.55    6.95
  -3  17  -1    7.56    3.79
  -3  18  -1 1017.00   71.30
  -3  19  -1   53.95    6.22
  -3  20  -1  159.40   12.63
  -3  21  -1  119.50   10.15
  -3  22  -1    4.61    3.53
  -3  23  -1   65.39    6.28
  -3  24  -1   -3.15    3.58
  -3  25  -1   24.35    4.41
  -3  26  -1    0.26    3.85
  -3  27  -1   35.93    4.38
  -3  28  -1   22.29    3.86
  -3  29  -1  100.90    8.34
  -3  30  -1    1.23    3.75
  -3  31  -1   46.07    5.24
   3  31   2    6.38    3.76
   3  30   2    2.72    3.50
   3  29   2    6.46    3.99
   3  28   2   59.59    6.07
   3  27   2   14.96    3.97
   3  26   2   38.34    4.88
   3  25   2  180.00   13.66
   3  24   2  271.20   19.79
   3  23   2    3.75    3.35
   3  22   2  251.90   18.53
   3  21   2  213.50   15.96
   3  20   2    5.56    3.48
   3  19   2  110.40    9.00
   3  18   2   38.27    4.62
   3  17   2   61.55    5.88
  -3 -16  -2   21.59    3.65
   3  16   2   14.98    3.50
  -3 -15  -2  677.30   47.62
   3  15   2  627.90   44.21
  -3 -14  -2 2085.00  144.80
   3  14   2 2055.00  142.70
  -3 -13  -2   -2.06    2.66
   3  13   2    0.13    2.68
  -3 -12  -2 1667.00  115.80
   3  12   2 1601.00  111.20
  -3 -11  -2   10.85    2.85
   3  11   2    8.05    2.70
  -3 -10  -2  603.50   42.31
   3  10   2  596.80   41.87
  -3  -9  -2  178.40   13.06
   3   9   2  144.60   10.80
  -3  -8  -2  691.30   48.26
   3   8   2  635.20   44.45
  -3  -7  -2  162.20   11.85
   3   7   2  161.70   11.90
  -3  -6  -2  138.00   10.17
   3   6   2  134.70   10.02
  -3  -5  -2   25.67    3.03
   3   5   2   28.02    3.30
  -3  -4  -2  302.70   21.42
   3   4   2  296.80   21.04
  -3  -3  -2  383.00   26.92
   3   3   2  394.10   27.72
  -3  -2  -2   29.87    3.14
   3   2   2   29.25    3.37
  -3  -1  -2  163.80   11.91
   3   1   2  157.30   11.55
  -3   0  -2   12.14    2.45
   3   0   2   13.80    2.92
  -3   1  -2  160.00   11.82
  -3   2  -2   29.46    3.88
  -3   3  -2  414.40   29.31
  -3   4  -2  314.70   22.55
  -3  15  -2  703.10   49.42
  -3  16  -2   15.56    3.72
  -3  17  -2   51.90    5.87
  -3  18  -2   48.35    5.31
  -3  19  -2   87.77    8.03
  -3  20  -2   -0.31    3.42
  -3  21  -2  220.70   16.69
  -3  22  -2  259.00   19.29
  -3  23  -2    4.41    3.79
  -3  24  -2  265.50   19.40
  -3  25  -2  193.80   14.59
  -3  26  -2   47.31    5.21
  -3  27  -2   11.44    3.48
  -3  28  -2   58.89    6.05
  -3  29  -2    6.51    3.35
  -3  30  -2    5.60    3.27
  -3  31  -2    2.64    3.58
   3  30   3    5.25    3.81
   3  29   3    6.90    4.00
   3  28   3   46.95    5.47
   3  27   3   37.60    4.76
   3  26   3   54.35    5.75
   3  25   3   50.68    5.66
   3  24   3   -3.55    3.43
   3  23   3  104.40    8.78
   3  22   3   97.04    8.26
   3  21   3   95.60    8.32
   3  20   3  357.70   25.80
  -3 -19  -3   59.91    5.60
   3  19   3   67.14    6.36
  -3 -18  -3  539.90   38.13
   3  18   3  551.40   39.06
  -3 -17  -3  586.60   41.41
   3  17   3  589.60   41.62
  -3 -16  -3  432.30   30.72
   3  16   3  475.00   33.75
  -3 -15  -3  435.00   30.95
   3  15   3  486.60   34.50
  -3 -14  -3    1.61    3.12
   3  14   3    6.18    3.21
  -3 -13  -3 1925.00  133.70
   3  13   3 1944.00  135.00
  -3 -12  -3   99.19    8.09
   3  12   3  110.30    8.74
  -3 -11  -3 1023.00   71.28
   3  11   3 1118.00   77.94
  -3 -10  -3  482.30   33.96
   3  10   3  535.70   37.75
  -3  -9  -3 1707.00  118.50
   3   9   3 1707.00  118.50
  -3  -8  -3 1196.00   83.21
   3   8   3 1191.00   82.87
   3   7   3 8052.00  556.80
  -3  -6  -3    7.42    2.53
   3   6   3   -0.96    2.63
  -3  -5  -3  740.10   51.65
   3   5   3  721.00   50.38
  -3  -4  -3  234.50   16.86
   3   4   3  225.90   16.29
  -3  -3  -3 3786.00  262.00
   3   3   3 3887.00  269.10
  -3  -2  -3   28.47    3.33
   3   2   3   41.57    4.45
  -3  -1  -3  196.20   14.25
   3   1   3  187.20   13.79
  -3   0  -3   -1.60    2.55
   3   0   3    0.08    3.28
  -3   1  -3  194.50   14.31
   3  -1   3  185.80   13.76
  -3   2  -3   30.99    4.13
  -3   3  -3 3612.00  250.10
  -3   4  -3  236.50   17.32
  -3   5  -3  707.90   49.66
  -3   6  -3    7.88    3.75
  -3   7  -3 6485.00  448.70
  -3  17  -3  756.90   53.50
  -3  18  -3  527.30   37.48
  -3  19  -3   65.70    6.36
  -3  20  -3  374.20   27.08
  -3  21  -3   75.86    7.09
  -3  22  -3   98.92    8.79
  -3  23  -3  131.40   10.47
  -3  24  -3   -2.00    3.55
  -3  25  -3   56.32    5.59
  -3  26  -3   53.64    6.01
  -3  27  -3   40.78    4.53
  -3  28  -3   25.46    4.33
  -3  29  -3    1.91    3.41
  -3  30  -3   10.16    2.70
   3  30   4    9.23    3.87
   3  29   4  122.20    9.93
   3  28   4    7.75    3.95
   3  27   4   89.88    7.94
   3  26   4   27.75    4.34
   3  25   4  102.30    8.62
   3  24   4    0.65    3.29
   3  23   4   12.57    3.70
  -3 -22  -4   65.25    6.14
   3  22   4   62.95    6.26
  -3 -21  -4  127.50   10.02
   3  21   4  127.10   10.17
  -3 -20  -4    3.56    2.97
   3  20   4    2.15    3.43
  -3 -19  -4  442.60   31.49
   3  19   4  429.20   30.69
  -3 -18  -4   79.93    6.93
   3  18   4   92.55    7.97
  -3 -17  -4   21.40    3.61
   3  17   4   17.59    3.91
  -3 -16  -4  368.60   26.34
   3  16   4  358.20   25.73
  -3 -15  -4   58.39    5.57
   3  15   4   63.20    6.09
  -3 -14  -4  627.40   44.16
   3  14   4  646.70   45.52
  -3 -13  -4   56.30    5.56
   3  13   4   55.90    5.56
  -3 -12  -4   47.99    5.16
   3  12   4   40.09    4.71
  -3 -11  -4  127.60   10.06
   3  11   4  116.30    9.35
  -3 -10  -4   96.49    7.90
   3  10   4   92.79    7.65
  -3  -9  -4 1233.00   85.78
   3   9   4 1307.00   91.02
  -3  -8  -4  589.90   41.41
   3   8   4  589.30   41.47
  -3  -7  -4 2462.00  170.70
   3   7   4 2484.00  172.20
  -3  -6  -4   16.37    3.00
   3   6   4   12.79    2.87
  -3  -5  -4 1436.00   99.83
   3   5   4 1221.00   84.96
  -3  -4  -4  107.20    8.46
   3   4   4  101.80    8.10
  -3  -3  -4  849.80   59.37
   3   3   4  964.90   67.36
  -3  -2  -4  210.70   15.45
   3   2   4  232.40   17.01
  -3  -1  -4 1617.00  112.40
   3   1   4 1757.00  122.10
  -3   0  -4   27.02    3.91
   3   0   4   29.93    4.53
  -3   1  -4 1456.00  101.30
   3  -1   4 1546.00  107.50
  -3   2  -4  205.90   15.25
  -3   3  -4  867.50   60.71
  -3   4  -4   90.44    7.81
  -3   5  -4 1434.00   99.83
  -3   6  -4   11.91    3.84
  -3   7  -4 2540.00  176.30
  -3   8  -4  573.50   40.59
  -3   9  -4 1159.00   80.97
  -3  10  -4   90.66    8.01
  -3  11  -4  102.70    8.82
  -3  20  -4    2.57    3.36
  -3  21  -4  109.70    9.44
  -3  22  -4   55.18    5.76
  -3  23  -4    8.59    3.81
  -3  24  -4   -0.43    3.38
  -3  25  -4  102.70    8.59
  -3  26  -4   19.06    4.18
  -3  27  -4   94.05    7.83
  -3  28  -4    8.82    3.62
  -3  29  -4   80.08    7.04
  -3  30  -4    5.66    2.87
   3  29   5   10.78    4.07
   3  28   5   26.78    4.61
   3  27   5   79.20    7.33
   3  26   5   90.23    8.09
   3  25   5  263.90   19.38
   3  24   5   14.37    3.75
  -3 -23  -5  296.80   21.46
   3  23   5  268.60   19.74
  -3 -22  -5  355.40   25.48
   3  22   5  359.40   25.82
  -3 -21  -5  251.30   18.32
   3  21   5  243.60   18.04
  -3 -20  -5  163.10   12.38
   3  20   5  172.30   13.18
  -3 -19  -5  106.80    8.68
   3  19   5  124.00   10.02
  -3 -18  -5  202.70   15.09
   3  18   5  281.70   20.70
  -3 -17  -5   67.79    6.29
   3  17   5   75.32    7.04
  -3 -16  -5  181.10   13.57
   3  16   5  160.30   12.40
  -3 -15  -5    6.77    3.19
   3  15   5   10.36    3.51
  -3 -14  -5  634.90   44.69
   3  14   5  734.80   51.63
  -3 -13  -5  600.60   42.30
   3  13   5  628.70   44.32
  -3 -12  -5   59.23    5.69
   3  12   5   56.53    5.77
  -3 -11  -5  142.00   10.94
   3  11   5  139.80   10.92
  -3 -10  -5   48.77    5.14
   3  10   5   35.84    4.44
  -3  -9  -5  233.90   17.22
   3   9   5  250.90   18.35
  -3  -8  -5  352.50   25.31
   3   8   5  368.60   26.41
  -3  -7  -5   83.60    7.25
   3   7   5   64.90    5.95
  -3  -6  -5 4010.00  277.70
   3   6   5 3843.00  266.10
  -3  -5  -5  188.80   14.10
   3   5   5  172.00   12.90
  -3  -4  -5  153.10   11.78
   3   4   5  135.00   10.54
  -3  -3  -5 1545.00  107.50
   3   3   5 1672.00  116.20
  -3  -2  -5  141.00   10.97
   3   2   5  134.30   10.55
  -3  -1  -5  327.30   23.59
   3   1   5  350.60   25.19
  -3   0  -5   -1.25    3.12
   3   0   5    1.85    3.59
  -3   1  -5  312.50   22.53
   3  -1   5  351.60   25.26
  -3   2  -5  140.10   10.87
   3  -2   5  165.20   12.70
  -3   3  -5 1438.00  100.10
  -3   4  -5   78.68    7.24
  -3   5  -5  189.20   14.42
  -3   6  -5 3946.00  273.50
  -3   7  -5   80.61    7.49
  -3   8  -5  326.20   23.62
  -3   9  -5  227.20   16.94
  -3  10  -5   31.06    5.19
  -3  11  -5  119.80   10.11
  -3  12  -5   63.41    6.65
  -3  13  -5  634.10   44.97
  -3  14  -5  657.60   46.59
  -3  15  -5   14.56    5.05
  -3  16  -5  156.90   12.77
  -3  17  -5   67.46    7.25
  -3  18  -5  277.80   20.47
  -3  22  -5  339.80   24.47
  -3  23  -5  327.10   23.57
  -3  24  -5   12.65    3.67
  -3  25  -5  243.50   17.90
  -3  26  -5   89.62    7.66
  -3  27  -5   65.61    6.02
  -3  28  -5   15.93    3.58
  -3  29  -5   15.63    3.52
   3  28   6  149.30   11.68
   3  27   6   31.73    4.80
   3  26   6  196.30   14.75
  -3 -25  -6   56.06    5.50
   3  25   6   56.83    6.05
  -3 -24  -6  438.40   31.21
   3  24   6  484.40   34.36
  -3 -23  -6   19.25    3.64
   3  23   6   17.38    3.95
  -3 -22  -6  355.40   25.46
   3  22   6  370.10   26.60
  -3 -21  -6   74.90    6.62
   3  21   6   70.81    6.72
  -3 -20  -6  985.20   68.81
   3  20   6 1261.00   87.94
  -3 -19  -6   46.74    5.01
   3  19   6   36.00    4.83
  -3 -18  -6  229.90   16.95
   3  18   6  199.90   15.04
  -3 -17  -6   13.00    3.24
   3  17   6    6.61    3.52
  -3 -16  -6   -0.33    3.15
   3  16   6   -2.76    3.42
  -3 -15  -6   54.04    5.43
   3  15   6   55.84    5.84
  -3 -14  -6  144.20   11.15
   3  14   6  159.10   12.28
  -3 -13  -6   23.08    3.69
   3  13   6   17.76    3.85
  -3 -12  -6   26.12    3.70
   3  12   6   32.27    4.41
  -3 -11  -6  351.60   25.21
   3  11   6  399.90   28.62
  -3 -10  -6    2.79    2.51
   3  10   6    4.43    3.18
  -3  -9  -6   35.36    4.22
   3   9   6   32.32    4.59
  -3  -8  -6   46.53    4.83
   3   8   6   52.83    5.51
  -3  -7  -6  828.10   57.98
   3   7   6  815.00   57.15
  -3  -6  -6  926.80   64.80
   3   6   6  962.60   67.34
  -3  -5  -6  679.40   47.76
   3   5   6  713.30   50.17
  -3  -4  -6 1379.00   95.99
   3   4   6 1559.00  108.50
  -3  -3  -6   47.95    5.10
   3   3   6   53.69    5.60
  -3  -2  -6 1202.00   83.82
   3   2   6 1191.00   83.09
  -3  -1  -6   33.24    4.16
   3   1   6   39.80    4.91
  -3   0  -6 4292.00  297.10
   3   0   6 4064.00  281.50
  -3   1  -6   30.58    4.25
   3  -1   6   38.00    5.02
  -3   2  -6  913.40   63.99
   3  -2   6 1206.00   84.13
  -3   3  -6   41.70    4.97
  -3   4  -6 1362.00   95.00
  -3   5  -6  689.90   48.61
  -3   6  -6  786.20   55.16
  -3   7  -6  657.10   46.32
  -3   8  -6   42.77    5.48
  -3   9  -6   47.70    5.87
  -3  10  -6   -4.37    4.02
  -3  11  -6  294.20   21.68
  -3  12  -6   38.27    5.68
  -3  13  -6    9.82    4.79
  -3  14  -6  139.90   11.81
  -3  15  -6   37.02    5.78
  -3  16  -6    6.72    4.86
  -3  17  -6   15.45    4.90
  -3  18  -6  218.80   16.71
  -3  19  -6   38.61    5.91
  -3  20  -6 1098.00   76.84
  -3  21  -6   73.71    7.69
  -3  22  -6  346.70   25.36
  -3  23  -6   17.85    3.27
  -3  23  -6   28.68    5.85
  -3  24  -6  427.60   30.47
  -3  24  -6  433.70   31.12
  -3  25  -6   72.42    6.70
  -3  25  -6   49.15    6.51
  -3  26  -6  187.50   13.83
  -3  26  -6  198.80   15.33
  -3  27  -6   41.73    4.70
  -3  27  -6   35.79    5.78
  -3  28  -6  144.80   11.10
  -3  28  -6  149.40   12.02
   3  27   7   73.42    6.90
  -3 -26  -7    8.47    3.41
   3  26   7   14.15    3.85
  -3 -25  -7  106.70    8.66
   3  25   7  112.40    9.15
  -3 -24  -7    5.71    3.39
   3  24   7    5.39    3.61
  -3 -23  -7  101.20    8.31
   3  23   7   89.06    7.99
  -3 -22  -7    5.23    3.14
   3  22   7    3.80    3.49
  -3 -21  -7  215.60   15.86
   3  21   7  216.50   16.02
  -3 -20  -7    6.29    3.09
   3  20   7    9.75    3.74
  -3 -19  -7  138.30   10.75
   3  19   7  135.40   10.64
  -3 -18  -7   52.43    5.21
   3  18   7   52.06    5.60
  -3 -17  -7   79.06    6.91
   3  17   7   71.51    6.71
  -3 -16  -7   14.47    3.49
   3  16   7   23.73    4.18
  -3 -15  -7   15.13    3.52
   3  15   7   11.56    3.77
  -3 -14  -7  249.00   18.23
   3  14   7  291.70   21.34
  -3 -13  -7    5.48    3.11
   3  13   7   -2.77    3.29
  -3 -12  -7    9.23    3.22
   3  12   7   -1.47    3.12
  -3 -11  -7  430.80   30.66
   3  11   7  437.10   31.18
  -3 -10  -7   39.90    4.38
   3  10   7   56.21    5.75
  -3  -9  -7  262.20   19.01
   3   9   7  261.50   19.16
  -3  -8  -7    1.05    2.82
   3   8   7    0.60    3.01
  -3  -7  -7   61.53    5.82
   3   7   7   60.37    5.82
  -3  -6  -7  435.60   30.95
   3   6   7  506.70   35.97
  -3  -5  -7  172.40   13.06
   3   5   7  175.50   13.47
  -3  -4  -7    1.52    3.33
   3   4   7    6.48    3.72
  -3  -3  -7  396.00   28.39
   3   3   7  321.10   23.26
  -3  -2  -7    2.81    3.39
   3   2   7    1.58    3.59
  -3  -1  -7   28.24    4.41
   3   1   7   25.98    4.52
  -3   0  -7    4.20    3.29
   3   0   7    2.55    3.89
  -3   1  -7   33.12    4.66
   3  -1   7   38.22    5.14
  -3   2  -7   -2.53    3.11
   3  -2   7    5.78    4.02
  -3   3  -7  320.00   23.16
  -3   4  -7    5.50    3.42
  -3   5  -7  183.90   14.00
  -3   6  -7  430.80   30.82
  -3   7  -7   51.98    5.87
  -3   8  -7    0.63    4.52
  -3   9  -7  277.20   20.51
  -3  10  -7   47.12    6.08
  -3  11  -7  432.80   31.27
  -3  12  -7   -1.31    4.75
  -3  13  -7    1.52    4.70
  -3  14  -7  285.50   21.37
  -3  15  -7    6.91    4.91
  -3  16  -7    8.99    4.72
  -3  17  -7   70.76    7.50
  -3  18  -7   49.72    6.40
  -3  19  -7  139.90   11.41
  -3  20  -7    5.11    5.03
  -3  21  -7  213.40   16.22
  -3  22  -7   -5.64    4.77
  -3  23  -7   79.20    8.19
  -3  24  -7    4.57    4.87
  -3  26  -7   13.26    3.41
  -3  26  -7   13.50    5.13
  -3  27  -7   48.76    4.97
  -3  27  -7   45.83    6.57
  -3 -25  -8  173.30   13.05
   3  25   8  186.20   14.02
  -3 -24  -8   49.17    5.15
   3  24   8   42.21    5.22
  -3 -23  -8   23.82    3.87
   3  23   8   21.44    4.03
  -3 -22  -8  120.10    9.47
   3  22   8  132.80   10.58
  -3 -21  -8   20.96    3.69
   3  21   8   15.10    4.00
  -3 -20  -8   22.37    3.77
   3  20   8   12.58    3.82
  -3 -19  -8    3.77    2.60
   3  19   8    5.27    3.64
  -3 -18  -8  146.00   11.26
   3  18   8  144.10   11.42
  -3 -17  -8    0.82    2.85
   3  17   8    9.39    3.57
  -3 -16  -8   47.31    4.87
   3  16   8   51.47    5.56
  -3 -15  -8   40.48    4.76
   3  15   8   45.65    5.30
  -3 -14  -8   33.01    4.42
   3  14   8   41.58    4.82
  -3 -13  -8   23.94    4.05
   3  13   8   11.76    3.64
  -3 -12  -8  326.70   23.57
   3  12   8  345.40   24.97
  -3 -11  -8  874.40   61.22
   3  11   8  857.90   60.20
  -3 -10  -8  443.10   31.53
   3  10   8  385.10   27.67
  -3  -9  -8  108.40    8.74
   3   9   8  111.70    9.22
  -3  -8  -8    5.63    3.09
   3   8   8    4.68    3.53
  -3  -7  -8  834.30   58.56
   3   7   8  810.60   56.93
  -3  -6  -8  151.20   11.69
   3   6   8  126.10   10.29
  -3  -5  -8  873.10   61.26
   3   5   8  773.70   54.44
  -3  -4  -8    7.62    3.33
   3   4   8   12.25    3.75
  -3  -3  -8   -1.64    3.26
   3   3   8    2.18    3.38
  -3  -2  -8  636.50   44.96
   3   2   8  592.90   41.93
  -3  -1  -8    5.01    3.29
   3   1   8    2.43    3.69
  -3   0  -8  794.10   55.79
   3   0   8  743.70   52.34
  -3   1  -8    7.22    3.38
   3  -1   8    2.99    3.87
  -3   2  -8  616.70   43.52
   3  -2   8  634.00   44.81
  -3   3  -8    2.59    3.12
  -3   4  -8    5.91    3.32
  -3   5  -8  839.80   58.97
  -3   6  -8  145.10   11.42
  -3   7  -8  780.80   54.87
  -3   8  -8    9.35    4.37
  -3   9  -8   93.57    8.72
  -3  10  -8  491.30   35.22
  -3  11  -8  910.10   63.91
  -3  12  -8  292.10   21.49
  -3  13  -8    9.00    4.53
  -3  14  -8   34.06    5.57
  -3  15  -8   50.24    6.40
  -3  16  -8   49.25    6.29
  -3  17  -8    1.95    4.67
  -3  18  -8  157.00   12.71
  -3  19  -8   -0.64    5.04
  -3  20  -8   25.15    5.31
  -3  21  -8   15.61    5.07
  -3  22  -8  154.10   12.65
  -3  23  -8   28.63    5.48
  -3  24  -8   38.70    6.05
  -3  25  -8  200.90   15.38
  -3 -23  -9   45.96    4.97
   3  23   9   53.15    5.62
  -3 -22  -9   36.33    4.42
   3  22   9   29.80    4.65
  -3 -21  -9    1.43    3.39
   3  21   9    6.07    3.83
  -3 -20  -9  163.70   12.49
   3  20   9  174.80   13.40
  -3 -19  -9    4.78    2.92
   3  19   9   -2.31    3.68
  -3 -18  -9  281.20   20.36
   3  18   9  273.60   20.00
  -3 -17  -9  643.90   45.23
   3  17   9  539.00   38.16
  -3 -16  -9  255.80   18.72
   3  16   9  225.60   16.86
  -3 -15  -9  322.20   23.13
   3  15   9  340.20   24.50
  -3 -14  -9   74.15    6.52
   3  14   9   78.73    7.06
  -3 -13  -9  165.40   12.60
   3  13   9  143.40   11.29
  -3 -12  -9  107.30    8.89
   3  12   9  106.60    8.84
  -3 -11  -9  466.30   33.14
   3  11   9  565.50   40.03
  -3 -10  -9    3.66    3.32
   3  10   9   -3.77    3.45
  -3  -9  -9  183.70   13.83
   3   9   9  188.40   14.32
  -3  -8  -9   47.11    5.12
   3   8   9   33.51    4.62
  -3  -7  -9  144.50   11.33
   3   7   9  145.50   11.48
  -3  -6  -9  130.50   10.39
   3   6   9  153.50   11.97
  -3  -5  -9   62.94    6.13
   3   5   9   67.46    6.64
  -3  -4  -9  977.40   68.38
   3   4   9  945.20   66.26
  -3  -3  -9  565.60   40.02
   3   3   9  631.20   44.66
  -3  -2  -9  599.30   42.33
   3   2   9  671.40   47.34
  -3  -1  -9    7.01    3.23
   3   1   9    4.99    3.60
  -3   0  -9    1.08    3.16
   3   0   9   -5.08    3.35
  -3   1  -9   16.31    3.64
   3  -1   9   12.41    3.81
  -3   2  -9  536.60   38.05
   3  -2   9  411.10   29.47
  -3   3  -9  694.40   48.92
  -3   4  -9  852.60   59.76
  -3   5  -9   57.47    5.79
  -3   6  -9  159.60   12.24
  -3   7  -9  110.30    8.95
  -3   8  -9   32.67    4.44
  -3   9  -9  167.50   12.79
  -3  10  -9    0.78    3.43
  -3  11  -9  463.30   33.23
  -3  12  -9  112.90    9.81
  -3  13  -9  160.70   12.86
  -3  14  -9   59.73    6.77
  -3  15  -9  346.20   25.10
  -3  16  -9  242.90   18.08
  -3  17  -9  634.00   44.84
  -3  18  -9  332.10   24.14
  -3  19  -9    2.05    4.80
  -3  20  -9  142.80   11.78
  -3  21  -9    7.90    4.42
  -3  22  -9   38.52    6.00
  -3  23  -9   46.35    6.11
  -3 -21 -10    4.51    3.48
   3  21  10    0.17    3.56
  -3 -20 -10    8.90    3.41
   3  20  10   12.57    3.93
  -3 -19 -10   21.33    3.82
   3  19  10   13.81    4.04
  -3 -18 -10   12.85    3.63
   3  18  10    2.45    3.57
  -3 -17 -10   33.65    3.95
   3  17  10   29.68    4.66
  -3 -16 -10  193.50   14.53
   3  16  10  190.90   14.42
  -3 -15 -10    4.11    3.25
   3  15  10    7.83    3.73
  -3 -14 -10  172.00   13.02
   3  14  10  202.70   15.23
  -3 -13 -10    3.15    3.25
   3  13  10    5.54    3.49
  -3 -12 -10  383.70   27.42
   3  12  10  348.40   25.06
  -3 -11 -10  110.50    8.91
   3  11  10  104.90    8.86
  -3 -10 -10   27.19    4.11
   3  10  10   39.83    4.94
  -3  -9 -10  211.30   15.74
   3   9  10  195.80   14.74
  -3  -8 -10  176.50   13.42
   3   8  10  208.70   15.62
  -3  -7 -10  291.40   21.17
   3   7  10  254.40   18.74
  -3  -6 -10   93.55    7.89
   3   6  10   79.79    7.32
  -3  -5 -10    0.23    3.12
   3   5  10   10.03    3.57
  -3  -4 -10   47.40    5.18
   3   4  10   47.17    5.49
  -3  -3 -10  137.90   10.91
   3   3  10   99.67    8.40
  -3  -2 -10  355.00   25.57
   3   2  10  320.30   23.24
  -3  -1 -10  103.10    8.76
   3   1  10   89.86    7.93
  -3   0 -10  793.60   55.74
   3   0  10  873.50   61.28
  -3   1 -10  109.00    9.08
   3  -1  10  117.30    9.71
  -3   2 -10  321.40   23.28
   3  -2  10  303.60   22.11
  -3   3 -10  135.70   10.78
  -3   4 -10   39.05    4.77
  -3   5 -10   10.10    3.32
  -3   6 -10   78.00    7.18
  -3   7 -10  265.30   19.53
  -3   8 -10  180.40   13.63
  -3   9 -10  195.00   14.64
  -3  10 -10   28.56    4.29
  -3  11 -10  100.10    8.49
  -3  12 -10  342.30   24.59
  -3  13 -10    5.47    3.94
  -3  14 -10  175.50   13.68
  -3  15 -10   10.92    4.58
  -3  16 -10  139.20   11.26
  -3  17 -10   34.71    5.40
  -3  18 -10   17.09    4.93
  -3  19 -10    9.92    4.77
  -3  20 -10   -1.54    4.42
  -3  21 -10    7.53    4.67
  -3 -19 -11   53.42    5.21
   3  19  11   52.71    5.67
  -3 -18 -11   17.37    3.91
   3  18  11   22.53    4.24
  -3 -17 -11    6.26    3.27
   3  17  11    5.61    3.58
  -3 -16 -11   20.68    3.85
   3  16  11   27.02    4.45
  -3 -15 -11  267.00   19.39
   3  15  11  289.00   20.97
  -3 -14 -11   84.41    7.43
   3  14  11   79.04    7.34
  -3 -13 -11  501.70   35.51
   3  13  11  492.60   35.01
  -3 -12 -11   57.21    5.65
   3  12  11   50.16    5.50
  -3 -11 -11  316.70   22.83
   3  11  11  303.60   22.09
  -3 -10 -11   18.86    3.77
   3  10  11   15.99    3.92
  -3  -9 -11  331.00   23.79
   3   9  11  337.90   24.35
  -3  -8 -11   16.76    3.74
   3   8  11   32.03    4.78
  -3  -7 -11  396.00   28.28
   3   7  11  459.90   32.78
  -3  -6 -11    5.39    3.10
   3   6  11    5.41    3.59
  -3  -5 -11  354.40   25.43
   3   5  11  333.50   24.07
  -3  -4 -11   19.44    3.95
   3   4  11   11.59    3.78
  -3  -3 -11   30.37    4.37
   3   3  11   35.36    4.74
  -3  -2 -11   12.13    3.69
   3   2  11   11.93    3.99
  -3  -1 -11    6.44    3.19
   3   1  11    2.62    3.77
  -3   0 -11    1.42    3.28
   3   0  11   -2.82    3.62
  -3   1 -11    4.83    3.27
   3  -1  11    2.80    3.69
  -3   2 -11   19.81    3.82
  -3   3 -11   29.54    4.45
  -3   4 -11   21.87    4.29
  -3   5 -11  302.10   21.91
  -3   6 -11    7.36    3.53
  -3   7 -11  461.70   32.92
  -3   8 -11   21.98    4.00
  -3   9 -11  339.10   24.44
  -3  10 -11   14.25    3.48
  -3  11 -11  316.60   22.92
  -3  12 -11   41.22    4.88
  -3  13 -11  431.30   30.61
  -3  14 -11   89.15    7.59
  -3  15 -11  278.50   20.28
  -3  16 -11   16.62    3.90
  -3  17 -11    6.44    4.61
  -3  18 -11   12.96    4.47
  -3  19 -11   43.94    6.11
  -3 -16 -12   18.65    3.82
   3  16  12   29.81    4.76
  -3 -15 -12    3.32    2.78
   3  15  12    3.90    4.14
  -3 -14 -12  139.00   10.89
   3  14  12  169.80   12.95
  -3 -13 -12    2.16    3.35
   3  13  12    4.07    3.79
  -3 -12 -12  113.00    9.05
   3  12  12  134.90   10.65
  -3 -11 -12   -2.49    3.31
   3  11  12    0.10    3.68
  -3 -10 -12  428.20   30.41
   3  10  12  473.80   33.71
  -3  -9 -12  166.30   12.68
   3   9  12  183.90   14.07
  -3  -8 -12  203.20   15.18
   3   8  12  202.30   15.23
  -3  -7 -12  106.70    8.69
   3   7  12  115.40    9.53
  -3  -6 -12  118.40    9.41
   3   6  12  112.90    9.32
  -3  -5 -12   44.56    5.23
   3   5  12   63.63    6.20
  -3  -4 -12  115.60    9.35
   3   4  12   97.65    8.30
  -3  -3 -12  265.30   19.33
   3   3  12  287.10   20.97
  -3  -2 -12    7.65    3.58
   3   2  12   10.93    3.99
  -3  -1 -12  111.80    9.10
   3   1  12  119.90    9.81
  -3   0 -12  228.40   16.95
   3   0  12  235.60   17.38
  -3   1 -12  103.30    8.65
   3  -1  12  109.20    8.86
  -3   2 -12   10.16    3.73
  -3   3 -12  286.60   20.85
  -3   4 -12  107.00    8.96
  -3   5 -12   56.44    5.97
  -3   6 -12  129.10   10.28
  -3   7 -12  102.70    8.58
  -3   8 -12  209.30   15.53
  -3   9 -12  179.10   13.55
  -3  10 -12  414.60   29.48
  -3  11 -12    2.51    3.36
  -3  12 -12  113.50    9.14
  -3  13 -12   -2.84    3.28
  -3  14 -12  126.20   10.03
  -3  15 -12    9.89    3.68
  -3  16 -12   20.97    4.06
  -3 -11 -13   -4.77    2.95
   3  11  13    0.73    4.02
  -3 -10 -13   11.45    3.65
   3  10  13   12.78    4.24
  -3  -9 -13   96.50    8.17
   3   9  13   92.39    8.00
  -3  -8 -13  203.90   15.07
   3   8  13  200.40   14.91
  -3  -7 -13    9.70    3.56
   3   7  13   -2.11    3.64
  -3  -6 -13  127.90   10.24
   3   6  13  104.10    8.64
  -3  -5 -13   -0.19    3.43
   3   5  13    5.89    3.70
  -3  -4 -13  128.50   10.05
   3   4  13  129.70   10.45
  -3  -3 -13   30.13    4.50
   3   3  13   17.40    4.11
  -3  -2 -13   32.72    4.63
   3   2  13   17.90    4.46
  -3  -1 -13   48.36    5.41
   3   1  13   44.52    5.14
  -3   0 -13    3.49    3.49
   3   0  13    4.91    3.77
  -3   1 -13   38.61    4.73
  -3   2 -13   30.02    4.27
  -3   3 -13   25.68    3.97
  -3   4 -13  124.40    9.90
  -3   5 -13   -1.38    3.62
  -3   6 -13  121.00    9.72
  -3   7 -13   15.99    3.65
  -3   8 -13  172.50   12.97
  -3   9 -13   90.44    7.68
  -3  10 -13   20.54    3.84
  -3  11 -13    7.14    2.98
  -3  -3 -14   61.80    6.34
   3   3  14   65.65    6.76
  -3  -2 -14  126.90   10.05
   3   2  14  118.40    9.69
  -3  -1 -14    2.12    3.38
   3   1  14   -0.40    3.47
  -3   0 -14    1.58    3.47
  -3   1 -14    2.20    3.37
  -3   2 -14  110.70    8.92
   4   8 -16    9.49    3.52
   4   7 -16  150.80   11.57
   4   6 -16   31.67    4.34
  -4  -5  16  122.10    9.90
   4   5 -16  118.30    9.40
  -4  -4  16  185.20   13.92
   4   4 -16  175.20   13.12
  -4  -3  16  134.60   10.64
   4   3 -16  123.50    9.73
  -4  -2  16   50.24    5.76
   4   2 -16   62.69    5.95
  -4  -1  16   29.99    4.56
   4   1 -16   26.11    4.28
  -4   0  16   16.74    4.13
   4   0 -16   20.97    4.12
  -4   1  16   29.42    4.20
   4  -1 -16   30.66    3.93
  -4   2  16   65.54    5.94
   4  -2 -16   51.05    5.26
  -4   3  16  139.30   10.72
   4  -3 -16  141.10   10.96
  -4   4  16  174.20   13.08
   4  -4 -16  194.00   14.47
  -4   5  16  127.70   10.25
   4  -5 -16  126.70    9.94
  -4   6  16   35.68    4.88
   4  -6 -16   29.08    3.94
  -4   7  16  168.10   12.64
   4  -7 -16  161.60   12.01
  -4   8  16    9.52    3.51
   4  -8 -16    6.19    3.11
   4  14 -15   -3.47    3.74
   4  13 -15  181.70   13.61
   4  12 -15   12.73    3.58
   4  11 -15  145.00   11.00
   4  10 -15   13.28    3.56
   4   9 -15  289.10   20.89
   4   8 -15   92.52    7.73
   4   7 -15   85.46    7.38
  -4  -6  15  257.10   18.98
   4   6 -15  231.60   17.03
  -4  -5  15  212.70   15.90
   4   5 -15  192.80   14.38
  -4  -4  15    5.75    4.23
   4   4 -15    4.19    3.46
  -4  -3  15   43.98    5.54
   4   3 -15   42.07    4.82
  -4  -2  15  176.00   13.60
   4   2 -15  181.20   13.55
  -4  -1  15  136.70   10.89
   4   1 -15  133.10   10.53
  -4   0  15    2.31    3.67
   4   0 -15    6.38    3.61
  -4   1  15  134.20   10.72
   4  -1 -15  142.40   11.28
  -4   2  15  176.80   13.51
   4  -2 -15  172.80   13.12
  -4   3  15   49.07    5.45
   4  -3 -15   49.02    5.27
  -4   4  15    4.69    3.35
   4  -4 -15    3.15    3.20
  -4   5  15  201.30   14.99
   4  -5 -15  198.30   14.75
  -4   6  15  245.10   18.15
   4  -6 -15  226.40   16.61
  -4   7  15   70.46    6.51
   4  -7 -15   70.68    6.28
  -4   8  15   87.69    7.62
   4  -8 -15   93.28    7.75
  -4   9  15  301.60   21.63
   4  -9 -15  304.30   21.88
  -4  10  15   11.10    4.00
   4 -10 -15   17.92    3.72
  -4  11  15  148.30   11.61
   4 -11 -15  138.80   10.56
  -4  12  15   12.59    3.32
   4 -12 -15   21.16    3.23
  -4  13  15  184.60   13.76
   4 -13 -15  182.60   13.47
  -4  14  15    1.47    3.32
   4  17 -14    0.94    3.14
   4  16 -14    3.93    3.03
   4  15 -14   -0.52    3.21
   4  14 -14   54.50    5.57
   4  13 -14   70.36    6.62
   4  12 -14  159.10   12.23
   4  11 -14   51.92    5.52
   4  10 -14  197.40   14.86
   4   9 -14   44.42    4.79
   4   8 -14  240.00   17.73
   4   7 -14   88.80    7.59
  -4  -6  14   40.47    5.06
   4   6 -14   47.87    5.18
  -4  -5  14   30.08    4.74
   4   5 -14   33.20    4.51
  -4  -4  14  141.30   11.24
   4   4 -14  143.60   11.18
  -4  -3  14   -0.55    3.67
   4   3 -14    4.99    3.14
  -4  -2  14   75.67    7.03
   4   2 -14   67.87    6.25
  -4  -1  14    3.02    3.64
   4   1 -14    2.93    3.30
  -4   0  14   18.21    3.87
   4   0 -14   21.84    4.03
  -4   1  14    2.57    3.40
   4  -1 -14    4.58    3.44
  -4   2  14   73.72    6.69
   4  -2 -14   72.41    6.48
  -4   3  14    7.05    3.26
   4  -3 -14   10.09    3.22
  -4   4  14  149.10   11.47
   4  -4 -14  163.30   12.40
  -4   5  14   32.59    4.72
   4  -5 -14   17.58    3.65
  -4   6  14   42.93    5.44
   4  -6 -14   33.79    4.44
  -4   7  14   93.26    8.29
   4  -7 -14   95.40    8.05
  -4   8  14  165.00   12.75
   4  -8 -14  240.00   17.59
  -4   9  14   34.83    4.62
   4  -9 -14   52.36    5.52
  -4  10  14  209.90   15.60
   4 -10 -14  216.00   15.91
  -4  11  14   24.05    4.07
   4 -11 -14   43.65    4.84
  -4  12  14  188.20   14.31
   4 -12 -14  214.70   15.77
  -4  13  14   79.97    7.01
   4 -13 -14   72.21    6.23
  -4  14  14   45.22    4.89
   4 -14 -14   48.22    4.72
  -4  15  14   -5.45    2.86
   4 -15 -14    0.89    2.78
  -4  16  14   11.11    3.53
   4 -16 -14   -0.92    2.76
  -4  17  14    3.28    2.79
   4 -17 -14   -1.47    2.74
   4  20 -13    1.15    3.29
   4  19 -13    1.98    3.35
   4  18 -13   22.74    3.72
   4  17 -13  220.20   16.25
   4  16 -13   -0.36    3.18
   4  15 -13  132.50   10.29
   4  14 -13   10.41    3.32
   4  13 -13  660.00   46.50
   4  12 -13   77.67    7.03
   4  11 -13  676.00   47.57
   4  10 -13   16.15    3.88
   4   9 -13  376.60   27.04
   4   8 -13  149.20   11.62
  -4  -7  13  550.70   38.96
   4   7 -13  531.10   37.64
  -4  -6  13   -2.57    3.61
   4   6 -13    5.54    3.43
  -4  -5  13    7.23    3.60
   4   5 -13    4.56    3.41
  -4  -4  13    7.83    3.53
   4   4 -13    3.83    3.26
  -4  -3  13   46.70    5.43
   4   3 -13   40.80    4.91
  -4  -2  13  108.20    8.93
   4   2 -13  100.30    8.49
  -4  -1  13   77.42    6.92
   4   1 -13   73.13    6.86
  -4   0  13    3.65    3.51
   4   0 -13   -1.46    3.39
  -4   1  13   84.99    7.67
   4  -1 -13   67.43    6.54
  -4   2  13  113.20    9.52
   4  -2 -13  110.10    9.08
  -4   3  13   50.61    5.82
   4  -3 -13   50.10    5.25
  -4   4  13    0.27    3.82
   4  -4 -13    7.29    3.49
  -4   5  13    7.92    3.91
   4  -5 -13    4.50    3.42
  -4   6  13    3.20    3.71
   4  -6 -13    6.00    3.28
  -4   7  13  535.80   37.90
   4  -7 -13  553.50   39.06
  -4   8  13  155.70   11.84
   4  -8 -13  154.00   11.81
  -4   9  13  383.80   27.51
   4  -9 -13  390.00   27.92
  -4  10  13    8.61    3.98
   4 -10 -13   13.86    3.63
  -4  11  13  664.80   46.91
   4 -11 -13  663.70   46.71
  -4  12  13   97.79    8.30
   4 -12 -13   91.18    7.51
  -4  13  13  574.60   40.56
   4 -13 -13  600.30   42.29
  -4  14  13   10.15    3.78
   4 -14 -13   10.64    3.45
  -4  15  13  109.10    9.00
   4 -15 -13  150.70   11.59
  -4  16  13    3.62    2.94
   4 -16 -13    5.50    3.39
  -4  17  13  210.60   15.64
   4 -17 -13  204.10   15.17
  -4  18  13   25.45    4.31
   4 -18 -13   18.61    3.71
  -4  19  13    7.12    3.78
   4 -19 -13   10.23    3.42
  -4  20  13    0.70    3.14
   4 -20 -13    5.78    3.37
   4  22 -12   33.72    5.67
   4  21 -12    4.16    3.60
   4  20 -12    4.76    3.51
   4  19 -12    7.33    3.55
   4  18 -12  280.40   20.40
   4  17 -12  159.60   12.29
   4  16 -12  389.00   27.88
   4  15 -12    0.05    3.46
   4  14 -12   22.90    4.04
   4  13 -12   80.32    7.15
   4  12 -12  402.90   28.89
   4  11 -12   20.02    3.69
   4  10 -12  171.40   13.06
   4   9 -12    3.07    3.38
   4   8 -12  365.70   26.30
  -4  -7  12  360.90   26.16
   4   7 -12  352.20   25.36
  -4  -6  12   14.46    4.24
   4   6 -12   18.18    3.82
  -4  -5  12  112.30    9.44
   4   5 -12  109.60    9.06
  -4  -4  12  178.40   13.62
   4   4 -12  176.10   13.44
  -4  -3  12  113.40    9.24
   4   3 -12  114.50    9.41
  -4  -2  12  104.20    8.70
   4   2 -12   99.55    8.43
  -4  -1  12  118.60    9.54
   4   1 -12  129.00   10.23
  -4   0  12  161.70   12.37
   4   0 -12  178.30   13.59
  -4   1  12  133.30   10.47
   4  -1 -12  104.80    8.87
  -4   2  12   97.28    8.27
   4  -2 -12   94.34    8.08
  -4   3  12  110.60    9.17
   4  -3 -12  126.30   10.21
  -4   4  12  169.60   13.15
   4  -4 -12  143.90   11.37
  -4   5  12  118.80    9.93
   4  -5 -12  115.80    9.39
  -4   6  12   16.23    4.16
   4  -6 -12   21.53    4.04
  -4   7  12  365.30   26.47
   4  -7 -12  369.70   26.53
  -4   8  12  352.30   25.57
   4  -8 -12  380.90   27.31
  -4   9  12    4.24    3.95
   4  -9 -12   -2.81    3.42
  -4  10  12  207.10   15.39
   4 -10 -12  189.10   14.22
  -4  11  12   12.00    3.81
   4 -11 -12   19.96    3.75
  -4  12  12  441.60   31.41
   4 -12 -12  420.90   30.02
  -4  13  12   70.77    6.96
   4 -13 -12   64.70    6.25
  -4  14  12   20.91    4.80
   4 -14 -12   21.93    3.60
  -4  15  12    2.60    3.51
   4 -15 -12    6.67    2.56
  -4  16  12  413.80   29.47
   4 -16 -12  411.90   29.39
  -4  17  12  161.30   12.49
   4 -17 -12  143.90   11.18
  -4  18  12  279.50   20.39
   4 -18 -12  257.50   18.76
  -4  19  12    0.01    3.53
   4 -19 -12   -6.50    3.42
  -4  20  12    2.60    3.69
   4 -20 -12    2.18    3.46
  -4  21  12    7.64    3.33
   4 -21 -12    3.45    3.51
  -4  22  12   22.06    3.84
   4 -22 -12   33.11    4.27
   4  24 -11    0.27    4.54
   4  23 -11    9.70    4.60
   4  22 -11  113.80    9.68
   4  21 -11    4.58    4.47
   4  20 -11   38.34    5.55
   4  19 -11   36.48    5.77
   4  18 -11   54.91    6.30
   4  17 -11    9.02    4.10
   4  16 -11   22.31    3.95
   4  15 -11   -0.10    3.31
   4  14 -11  108.80    9.10
   4  13 -11   65.63    6.30
   4  12 -11   23.74    4.05
   4  11 -11  244.30   17.97
   4  10 -11  125.40   10.09
   4   9 -11   11.86    3.66
   4   8 -11   18.46    3.87
  -4  -7  11   -4.73    3.70
   4   7 -11   -1.48    3.20
  -4  -6  11  900.70   63.20
   4   6 -11  874.50   61.31
  -4  -5  11  143.80   11.48
   4   5 -11  155.50   11.98
  -4  -4  11  159.70   12.43
   4   4 -11  153.90   11.93
  -4  -3  11  107.10    9.13
   4   3 -11   81.47    7.32
  -4  -2  11   16.48    4.23
   4   2 -11   22.41    4.18
  -4  -1  11  139.00   11.14
   4   1 -11  135.80   10.85
  -4   0  11   -1.97    3.47
   4   0 -11   -0.45    3.25
  -4   1  11  122.10    9.99
   4  -1 -11  127.40   10.30
  -4   2  11   19.69    3.44
   4  -2 -11   26.46    4.21
  -4   3  11   90.09    7.78
   4  -3 -11   85.95    7.65
  -4   4  11  160.20   12.32
   4  -4 -11  154.50   12.10
  -4   5  11   94.69    8.03
   4  -5 -11  154.50   11.92
  -4   6  11  895.20   62.81
   4  -6 -11  944.00   66.20
  -4   7  11    2.41    3.89
   4  -7 -11    1.44    3.04
  -4   8  11   18.48    4.27
   4  -8 -11   22.69    4.16
  -4   9  11   10.71    4.12
   4  -9 -11    7.53    3.10
  -4  10  11  129.50   10.54
   4 -10 -11  133.40   10.64
  -4  11  11  295.50   21.87
   4 -11 -11  260.10   19.00
  -4  12  11   27.05    4.51
   4 -12 -11   26.24    4.28
  -4  13  11   53.84    5.79
   4 -13 -11   76.72    7.20
  -4  14  11  113.60    9.20
   4 -14 -11  110.50    8.90
  -4  15  11   -1.36    2.77
   4 -15 -11   -0.58    2.93
  -4  16  11   23.20    4.52
   4 -16 -11   28.00    4.24
  -4  17  11    3.34    3.73
   4 -17 -11    4.70    3.40
  -4  18  11   60.73    5.56
   4 -18 -11   70.07    6.51
  -4  19  11   34.00    4.37
   4 -19 -11   38.06    4.67
  -4  20  11   38.67    5.02
   4 -20 -11   44.12    4.85
  -4  21  11   13.05    3.75
   4 -21 -11   11.42    3.43
  -4  22  11  106.60    8.77
   4 -22 -11   99.14    8.19
  -4  23  11   15.52    3.90
   4 -23 -11   27.24    4.29
  -4  24  11    1.37    3.27
   4 -24 -11    4.24    3.33
   4  26 -10  154.50   12.53
   4  25 -10   14.22    4.87
   4  24 -10  329.30   23.92
   4  23 -10   88.26    8.27
   4  22 -10  103.30    9.26
   4  21 -10  183.10   14.21
   4  20 -10  403.80   29.04
   4  19 -10  115.40    9.85
   4  18 -10   36.66    5.35
   4  17 -10    3.40    4.15
   4  16 -10   35.41    5.39
   4  15 -10   11.71    4.37
   4  14 -10   76.17    7.18
   4  13 -10    2.13    3.17
   4  12 -10   97.84    8.23
   4  11 -10   -0.47    3.42
   4  10 -10    9.94    3.67
   4   9 -10   15.17    3.88
   4   8 -10    7.53    3.57
  -4  -7  10  147.70   11.80
   4   7 -10  129.60   10.41
  -4  -6  10  697.40   49.21
   4   6 -10  702.80   49.53
  -4  -5  10  140.50   11.29
   4   5 -10  132.50   10.62
  -4  -4  10   91.93    8.14
   4   4 -10   97.21    8.29
  -4  -3  10  127.70   10.70
   4   3 -10  121.70    9.88
  -4  -2  10  144.20   11.64
   4   2 -10  143.80   11.38
  -4  -1  10    7.23    3.93
   4   1 -10    1.67    3.30
  -4   0  10 2320.00  161.20
   4   0 -10 2271.00  157.70
  -4   1  10    2.87    3.03
   4  -1 -10    1.51    3.04
  -4   2  10  147.30   11.57
   4  -2 -10  152.10   11.95
  -4   3  10  111.00    9.27
   4  -3 -10  113.10    9.51
  -4   4  10  103.30    8.58
   4  -4 -10  102.80    8.79
  -4   5  10  146.50   11.55
   4  -5 -10  147.00   11.53
  -4   6  10  731.60   51.49
   4  -6 -10  741.70   52.17
  -4   7  10  176.60   13.63
   4  -7 -10  127.70   10.26
  -4   8  10    3.88    3.71
   4  -8 -10   11.28    3.68
  -4   9  10   20.16    4.25
   4  -9 -10   22.47    4.17
  -4  10  10   12.06    4.02
   4 -10 -10   10.68    3.70
  -4  11  10    0.57    3.38
   4 -11 -10   -4.26    3.22
  -4  12  10   94.97    8.49
   4 -12 -10   95.93    8.28
  -4  13  10   -4.24    3.52
   4 -13 -10   -1.62    2.45
  -4  14  10   69.53    6.86
   4 -14 -10   61.38    6.09
  -4  15  10   17.24    4.01
   4 -15 -10   14.97    3.70
  -4  16  10   27.32    4.35
   4 -16 -10   29.12    3.66
  -4  17  10    2.56    3.52
   4 -17 -10   -5.66    3.05
  -4  18  10   59.32    6.31
   4 -18 -10   59.22    5.82
  -4  19  10  108.70    9.28
   4 -19 -10  120.30    9.73
  -4  20  10  397.00   28.26
   4 -20 -10  417.80   29.81
  -4  21  10  186.50   14.11
   4 -21 -10  217.10   16.13
  -4  22  10  106.80    8.82
   4 -22 -10   97.44    8.09
  -4  23  10   87.57    7.63
   4 -23 -10   51.29    5.38
  -4  24  10  297.00   21.43
   4 -24 -10  301.50   21.74
  -4  25  10   23.76    4.10
   4 -25 -10   16.92    3.36
  -4  26  10  154.70   11.67
   4 -26 -10  145.10   10.94
   4  27  -9  102.30    8.27
   4  27  -9   98.40    9.15
   4  26  -9   39.24    5.95
   4  25  -9  321.20   23.47
   4  24  -9   12.76    4.85
   4  23  -9  369.30   26.78
   4  22  -9  200.50   15.33
   4  21  -9  266.90   19.88
   4  20  -9    1.43    4.70
   4  19  -9  285.70   21.02
   4  18  -9   77.83    7.56
   4  17  -9   18.76    4.49
   4  16  -9    2.57    4.38
   4  15  -9   87.31    8.11
   4  14  -9   60.20    6.59
   4  13  -9   94.78    8.61
   4  12  -9  111.50    9.57
   4  11  -9   71.57    6.57
   4  10  -9   41.12    4.79
   4   9  -9  201.10   15.12
   4   8  -9  307.30   22.43
  -4  -7   9   21.23    4.57
   4   7  -9   27.37    4.38
  -4  -6   9  516.00   36.71
   4   6  -9  591.10   41.87
  -4  -5   9  378.30   27.31
   4   5  -9  395.00   28.39
  -4  -4   9   13.81    4.38
   4   4  -9   15.92    3.89
  -4  -3   9  752.60   53.03
   4   3  -9  782.80   55.01
  -4  -2   9    0.94    4.14
   4   2  -9    2.28    3.37
  -4  -1   9 1944.00  135.20
   4   1  -9 1946.00  135.30
  -4   0   9   -1.40    3.97
   4   0  -9   -0.27    3.51
  -4   1   9 1489.00  103.80
   4  -1  -9 2257.00  156.80
  -4   2   9    1.29    3.52
   4  -2  -9    4.80    3.60
  -4   3   9  701.20   49.41
   4  -3  -9  717.20   50.49
  -4   4   9    8.39    3.70
   4  -4  -9    6.86    3.11
  -4   5   9  349.70   25.36
   4  -5  -9  348.90   25.20
  -4   6   9  549.00   38.91
   4  -6  -9  556.50   39.45
  -4   7   9   19.63    4.30
   4  -7  -9   16.79    3.53
  -4   8   9  327.80   23.80
   4  -8  -9  333.80   24.18
  -4   9   9  214.50   16.05
   4  -9  -9  220.30   16.47
  -4  10   9   40.64    5.07
   4 -10  -9   34.17    4.68
  -4  11   9   74.37    7.19
   4 -11  -9   70.72    6.37
  -4  12   9   96.05    8.46
   4 -12  -9   89.81    7.98
  -4  13   9   65.81    6.68
   4 -13  -9   93.32    7.77
  -4  14   9   59.64    6.44
   4 -14  -9   37.01    4.95
  -4  15   9   97.02    8.59
   4 -15  -9   90.20    7.81
  -4  16   9    1.84    3.87
   4 -16  -9    0.11    3.22
  -4  17   9   16.53    4.00
   4 -17  -9   16.15    3.84
  -4  18   9   61.68    6.13
   4 -18  -9   84.51    7.60
  -4  19   9  241.50   17.87
   4 -19  -9  261.30   19.22
  -4  20   9    3.15    3.98
   4 -20  -9    3.03    3.42
  -4  21   9  219.70   16.40
   4 -21  -9  251.30   18.43
  -4  22   9  173.60   13.15
   4 -22  -9  176.00   13.36
  -4  23   9  356.60   25.72
   4 -23  -9  348.20   25.03
  -4  24   9   -2.55    3.58
   4 -24  -9    0.85    3.30
  -4  25   9  323.00   23.35
   4 -25  -9  315.60   22.70
  -4  26   9   40.80    5.01
   4 -26  -9   49.00    4.82
  -4  27   9  104.00    8.31
   4 -27  -9  107.10    8.64
   4  28  -8   26.96    5.63
   4  28  -8   36.95    4.74
   4  27  -8   84.86    7.35
   4  27  -8   77.14    7.72
   4  26  -8   64.68    6.20
   4  26  -8   77.80    7.82
   4  25  -8   64.01    7.08
   4  24  -8   33.24    5.46
   4  23  -8  150.90   12.20
   4  22  -8  154.20   12.40
   4  21  -8   59.04    6.68
   4  20  -8   10.49    4.71
   4  19  -8    8.43    4.55
   4  18  -8  164.80   13.09
   4  17  -8   -0.95    4.41
   4  16  -8    6.13    4.44
   4  15  -8    1.73    4.44
   4  14  -8 1065.00   74.62
   4  13  -8  387.00   27.96
   4  12  -8  571.00   40.54
   4  11  -8  262.80   19.47
   4  10  -8  521.40   37.37
   4   9  -8  201.70   15.26
   4   8  -8   87.84    7.74
  -4  -7   8 2475.00  171.70
   4   7  -8 2272.00  157.80
  -4  -6   8    3.12    3.75
   4   6  -8    5.62    3.36
  -4  -5   8 1530.00  106.50
   4   5  -8 1585.00  110.30
  -4  -4   8  537.10   38.09
   4   4  -8  522.10   37.04
  -4  -3   8   94.60    8.34
   4   3  -8  111.50    9.18
  -4  -2   8  603.80   42.70
   4   2  -8  633.50   44.64
  -4  -1   8    4.50    3.55
   4   1  -8   -0.16    3.23
  -4   0   8    1.76    4.12
   4   0  -8   -3.28    3.19
  -4   1   8   -3.01    3.56
   4  -1  -8    1.75    3.30
  -4   2   8  631.70   44.65
   4  -2  -8  635.80   44.82
  -4   3   8   70.91    6.93
   4  -3  -8  102.80    8.58
  -4   4   8  443.40   31.79
   4  -4  -8  505.20   35.83
  -4   5   8 1730.00  120.50
   4  -5  -8 1595.00  111.00
  -4   6   8    4.67    3.64
   4  -6  -8    1.16    3.50
  -4   7   8 2384.00  165.50
   4  -7  -8 2361.00  163.90
  -4   8   8  108.20    9.06
   4  -8  -8   86.45    7.58
  -4   9   8  198.10   14.94
   4  -9  -8  198.30   15.03
  -4  10   8  428.90   30.75
   4 -10  -8  426.10   30.53
  -4  11   8  287.50   21.07
   4 -11  -8  312.20   22.73
  -4  12   8  636.70   45.11
   4 -12  -8  646.90   45.62
  -4  13   8  337.00   24.54
   4 -13  -8  321.10   23.31
  -4  14   8 1057.00   73.97
   4 -14  -8  696.20   49.02
  -4  15   8   -2.54    3.90
   4 -15  -8   -0.14    3.59
  -4  16   8   -1.36    3.94
   4 -16  -8    2.89    3.78
  -4  17   8   -4.40    3.89
   4 -17  -8    5.79    3.19
  -4  18   8  144.60   11.52
   4 -18  -8  165.30   12.67
  -4  19   8    5.10    3.24
   4 -19  -8   10.43    3.28
  -4  20   8   -2.73    3.60
   4 -20  -8   12.73    3.37
  -4  21   8   61.03    6.00
   4 -21  -8   67.81    6.15
  -4  22   8  151.30   12.02
   4 -22  -8  141.20   10.93
  -4  23   8  154.60   11.91
   4 -23  -8  137.60   10.72
  -4  24   8   33.21    4.78
   4 -24  -8   29.78    4.24
  -4  25   8   60.56    5.81
   4 -25  -8   60.06    5.85
  -4  26   8   81.00    7.20
   4 -26  -8   75.08    6.70
  -4  27   8   79.08    6.81
   4 -27  -8   82.41    6.88
  -4  28   8   39.22    4.42
   4  29  -7    1.02    3.31
   4  29  -7    3.08    5.18
   4  28  -7  435.60   31.30
   4  28  -7  419.40   29.80
   4  27  -7  229.60   17.47
   4  27  -7  216.80   16.12
   4  26  -7   82.78    8.31
   4  26  -7   63.06    6.27
   4  25  -7   12.51    5.02
   4  25  -7   19.93    4.07
   4  24  -7   10.82    5.02
   4  24  -7   11.11    3.68
   4  23  -7   56.53    6.61
   4  22  -7   13.52    5.28
   4  21  -7  262.20   19.53
   4  20  -7    9.06    4.90
   4  19  -7   -4.38    4.60
   4  18  -7   29.70    5.09
   4  17  -7  226.80   17.07
   4  16  -7   72.65    7.41
   4  15  -7   13.93    4.71
   4  14  -7   40.94    5.95
   4  13  -7   11.35    4.23
   4  12  -7   21.36    4.41
   4  11  -7  853.60   59.89
   4  10  -7  623.50   44.02
   4   9  -7 1200.00   83.71
   4   8  -7 4061.00  281.30
   4   7  -7 1562.00  108.70
  -4  -6   7  546.60   38.63
   4   6  -7  541.10   38.21
  -4  -5   7  428.20   30.58
   4   5  -7  466.70   33.10
  -4  -4   7  474.30   33.78
   4   4  -7  437.80   31.15
  -4  -3   7 3952.00  273.80
   4   3  -7 4108.00  284.50
  -4  -2   7  624.70   44.18
   4   2  -7  593.50   41.83
  -4  -1   7  976.30   68.40
   4   1  -7  829.80   58.12
  -4   0   7    2.36    3.37
   4   0  -7    2.54    3.11
  -4   1   7  842.10   59.16
   4  -1  -7  887.20   62.14
  -4   2   7  595.70   42.17
   4  -2  -7  585.40   41.32
  -4   3   7 4558.00  315.70
   4  -3  -7 4049.00  280.40
  -4   4   7  426.40   30.56
   4  -4  -7  443.40   31.52
  -4   5   7  438.10   31.35
   4  -5  -7  357.10   25.65
  -4   6   7  539.70   38.23
   4  -6  -7  540.90   38.26
  -4   7   7 1355.00   94.51
   4  -7  -7 1546.00  107.60
  -4   8   7 4252.00  294.50
   4  -8  -7 4114.00  284.90
  -4   9   7 1434.00   99.97
   4  -9  -7 1194.00   83.32
  -4  10   7  690.90   48.64
   4 -10  -7  669.70   47.24
  -4  11   7  922.10   64.61
   4 -11  -7  914.30   64.13
  -4  12   7   23.51    4.25
   4 -12  -7   30.32    4.74
  -4  13   7    1.76    3.80
   4 -13  -7    2.18    2.85
  -4  14   7   43.50    5.42
   4 -14  -7   46.31    5.35
  -4  15   7   13.62    3.76
   4 -15  -7   15.04    3.88
  -4  16   7   69.51    6.59
   4 -16  -7   63.66    6.10
  -4  17   7  235.30   17.65
   4 -17  -7  251.60   18.61
  -4  18   7   31.16    4.90
   4 -18  -7   24.47    4.23
  -4  19   7    0.38    3.32
   4 -19  -7   -4.56    3.40
  -4  20   7    4.18    3.58
   4 -20  -7    7.96    3.48
  -4  21   7  242.20   17.77
   4 -21  -7  240.90   17.75
  -4  22   7   21.00    3.87
   4 -22  -7   28.38    3.69
  -4  23   7   66.84    6.76
   4 -23  -7   71.70    6.53
  -4  24   7   18.89    4.13
   4 -24  -7   13.58    3.73
  -4  25   7   34.44    4.77
   4 -25  -7   25.28    4.15
  -4  26   7   74.75    6.98
   4 -26  -7   65.55    5.90
  -4  27   7  221.20   16.49
  -4  28   7  467.10   32.98
  -4  29   7   -1.08    2.95
   4  30  -6    1.79    3.86
   4  30  -6    7.29    5.52
   4  29  -6   68.76    6.40
   4  29  -6   55.25    6.87
   4  28  -6    9.77    5.47
   4  28  -6   -1.99    3.51
   4  27  -6   21.53    3.90
   4  27  -6   17.15    5.22
   4  26  -6    8.70    4.98
   4  26  -6   -0.20    3.58
   4  25  -6   64.09    6.18
   4  25  -6   59.22    7.00
   4  24  -6   79.20    8.10
   4  24  -6   77.19    6.98
   4  23  -6    0.26    3.38
   4  23  -6    8.97    5.15
   4  22  -6    4.98    4.77
   4  22  -6   -0.55    3.45
   4  21  -6  181.20   14.15
   4  20  -6   65.06    6.95
   4  19  -6   89.70    8.46
   4  18  -6  141.60   11.52
   4  17  -6  576.60   40.93
   4  16  -6   61.15    6.61
   4  15  -6  551.60   39.19
   4  14  -6  426.30   30.55
   4  13  -6   25.64    4.44
   4  12  -6  735.70   51.74
   4  11  -6  279.50   20.37
   4  10  -6  809.90   56.77
   4   9  -6  997.10   69.68
   4   8  -6 1643.00  114.30
   4   7  -6  193.60   14.38
  -4  -6   6 1597.00  111.00
   4   6  -6 1585.00  110.10
  -4  -5   6  690.30   48.50
   4   5  -6  704.90   49.43
  -4  -4   6  572.00   40.36
   4   4  -6  617.50   43.43
  -4  -3   6  314.80   22.75
   4   3  -6  323.90   23.20
  -4  -2   6   87.86    7.62
   4   2  -6   91.44    7.53
  -4  -1   6   89.89    7.84
   4   1  -6   83.21    7.04
  -4   0   6 1096.00   76.48
   4   0  -6 1012.00   70.64
  -4   1   6   89.96    7.50
   4  -1  -6   94.28    7.80
  -4   2   6   62.80    5.85
   4  -2  -6   80.32    6.94
  -4   3   6  295.00   21.30
   4  -3  -6  320.20   23.01
  -4   4   6  580.50   40.97
   4  -4  -6  581.60   41.05
  -4   5   6  623.60   43.97
   4  -5  -6  727.30   51.07
  -4   6   6 1580.00  110.00
   4  -6  -6 1506.00  104.80
  -4   7   6  185.00   14.10
   4  -7  -6  222.00   16.42
  -4   8   6 1683.00  117.00
   4  -8  -6 1592.00  110.70
  -4   9   6  862.70   60.44
   4  -9  -6  912.00   63.79
  -4  10   6  819.80   57.51
   4 -10  -6  825.00   57.81
  -4  11   6  295.00   21.51
   4 -11  -6  300.90   21.84
  -4  12   6  846.80   59.33
   4 -12  -6  829.40   58.28
  -4  13   6   27.33    4.47
   4 -13  -6   25.73    3.78
  -4  14   6  434.50   31.11
   4 -14  -6  420.00   30.14
  -4  15   6  555.10   39.45
   4 -15  -6  523.50   37.19
  -4  16   6   89.38    8.20
   4 -16  -6   66.84    6.32
  -4  17   6  570.60   40.52
   4 -17  -6  630.50   44.52
  -4  18   6  145.30   11.50
   4 -18  -6  153.60   12.00
  -4  19   6  119.50    9.98
   4 -19  -6  113.20    9.32
  -4  20   6   68.46    6.86
   4 -20  -6   66.48    6.42
  -4  21   6  183.00   13.81
   4 -21  -6  169.70   13.10
  -4  22   6   -0.11    3.07
   4 -22  -6    6.47    3.52
  -4  23   6   -1.49    3.15
   4 -23  -6    1.48    2.88
  -4  24   6   80.61    7.33
   4 -24  -6   82.50    7.22
  -4  25   6   76.43    6.51
  -4  26   6   -0.56    3.02
  -4  27   6   22.58    4.19
  -4  28   6    0.14    3.83
  -4  29   6   65.33    5.96
  -4  30   6    6.40    3.33
   4  30  -5   12.26    5.45
   4  30  -5    7.90    3.66
   4  29  -5   32.86    5.78
   4  29  -5   40.47    4.97
   4  28  -5   -1.15    4.15
   4  28  -5    5.55    3.69
   4  27  -5   65.68    6.30
   4  26  -5    6.97    3.76
   4  25  -5   25.07    4.45
   4  24  -5  180.20   13.72
   4  23  -5  131.90   10.49
   4  22  -5   12.91    3.82
   4  21  -5    3.78    3.38
   4  21  -5    5.92    4.22
   4  20  -5    4.22    4.32
   4  20  -5    4.81    3.59
   4  19  -5   78.29    7.62
   4  18  -5   11.63    4.50
   4  17  -5   77.52    7.77
   4  16  -5  192.20   14.84
   4  15  -5  556.30   39.44
   4  14  -5    4.07    3.91
   4  13  -5  987.70   69.06
   4  12  -5   60.05    5.96
   4  11  -5  621.50   43.74
   4  10  -5   12.81    3.77
   4   9  -5  615.00   43.28
   4   8  -5  310.70   22.37
   4   7  -5   68.10    6.21
   4   6  -5   44.54    4.62
  -4  -5   5   32.67    4.63
   4   5  -5   28.22    3.68
  -4  -4   5   14.71    3.85
   4   4  -5   22.71    3.33
  -4  -3   5  822.60   57.58
   4   3  -5  788.70   55.11
  -4  -2   5  448.70   31.82
   4   2  -5  484.10   34.12
  -4  -1   5   -1.87    3.58
   4   1  -5   -0.44    2.75
  -4   0   5    2.72    2.81
   4   0  -5   -0.91    2.83
  -4   1   5   -0.01    3.08
   4  -1  -5    3.08    2.86
  -4   2   5  481.70   34.07
   4  -2  -5  500.50   35.30
  -4   3   5  791.20   55.40
   4  -3  -5  710.30   49.76
  -4   4   5   10.25    3.24
   4  -4  -5   14.07    3.24
  -4   5   5   25.13    3.98
   4  -5  -5   23.91    3.81
  -4   6   5   28.18    4.05
   4  -6  -5   17.28    3.62
  -4   7   5   73.58    6.63
   4  -7  -5   76.97    6.68
  -4   8   5  318.90   23.05
   4  -8  -5  362.40   26.03
  -4   9   5  631.70   44.52
   4  -9  -5  650.50   45.78
  -4  10   5   12.00    3.60
   4 -10  -5   20.55    3.88
  -4  11   5  615.10   43.39
   4 -11  -5  617.60   43.51
  -4  12   5   57.13    5.62
   4 -12  -5   58.74    5.91
  -4  13   5  965.70   67.55
   4 -13  -5 1020.00   71.33
  -4  14   5    2.68    3.07
   4 -14  -5    3.26    3.58
  -4  15   5  529.80   37.59
   4 -15  -5  264.00   19.54
  -4  16   5  161.70   12.66
   4 -16  -5  175.60   13.51
  -4  17   5   68.15    6.60
   4 -17  -5   73.65    6.97
  -4  18   5    6.77    4.03
   4 -18  -5   -0.30    3.41
  -4  19   5   63.33    6.51
   4 -19  -5   69.52    6.49
  -4  20   5    5.99    2.96
   4 -20  -5    6.18    3.59
  -4  21   5    0.15    3.22
   4 -21  -5   -0.18    3.52
  -4  22   5   10.55    3.50
   4 -22  -5   18.57    3.30
  -4  23   5  128.60   10.11
  -4  24   5  169.50   12.94
  -4  25   5   31.26    4.93
  -4  26   5   11.85    3.74
  -4  27   5   58.49    5.81
  -4  28   5   -2.52    3.40
  -4  29   5   61.56    6.16
  -4  30   5    4.47    3.50
   4  31  -4   28.33    4.46
   4  30  -4  106.10    8.79
   4  29  -4  232.30   17.15
   4  28  -4   29.89    4.48
   4  27  -4  114.20    9.23
   4  26  -4   41.27    5.09
   4  25  -4   27.14    4.27
   4  24  -4   17.21    4.00
   4  23  -4  111.10    9.23
   4  22  -4   18.24    4.20
   4  21  -4  194.60   14.82
   4  20  -4  102.50    8.70
   4  19  -4   31.75    4.44
   4  18  -4  377.70   27.10
   4  17  -4  156.10   11.99
   4  13  -4   26.58    4.27
   4  12  -4 1022.00   71.27
   4  11  -4  129.90   10.15
   4  10  -4 6442.00  445.60
   4   9  -4 1052.00   73.31
   4   8  -4 1296.00   90.14
   4   7  -4  237.20   17.24
   4   6  -4  657.60   46.05
   4   5  -4    9.51    2.74
  -4  -4   4 1070.00   74.55
   4   4  -4 1061.00   73.83
  -4  -3   4 2509.00  173.90
   4   3  -4 2645.00  183.20
  -4  -2   4   91.54    7.48
   4   2  -4   83.26    6.69
  -4  -1   4  131.80    9.98
   4   1  -4  138.50   10.30
  -4   0   4  918.20   64.00
   4   0  -4  942.20   65.59
  -4   1   4  121.90    9.34
   4  -1  -4  144.50   10.75
  -4   2   4   84.21    6.84
   4  -2  -4   83.34    6.74
  -4   3   4 2998.00  207.60
   4  -3  -4 2580.00  178.70
  -4   4   4 1055.00   73.47
   4  -4  -4 1068.00   74.34
  -4   5   4   15.96    3.19
   4  -5  -4   14.64    2.82
  -4   6   4  670.60   47.09
   4  -6  -4  692.90   48.53
  -4   7   4  219.30   16.11
   4  -7  -4  216.50   15.95
  -4   8   4 1316.00   91.62
   4  -8  -4 1071.00   74.77
  -4   9   4 1041.00   72.69
   4  -9  -4 1016.00   70.97
  -4  10   4 5374.00  372.00
   4 -10  -4 6327.00  437.80
  -4  11   4  137.90   10.62
   4 -11  -4  140.00   11.04
  -4  12   4 1118.00   78.01
   4 -12  -4 1123.00   78.37
  -4  13   4   30.25    4.18
   4 -13  -4   30.23    4.05
  -4  14   4 1756.00  122.10
   4 -14  -4 1718.00  119.50
  -4  15   4   63.22    6.23
   4 -15  -4   76.70    7.02
  -4  16   4  609.10   43.03
   4 -16  -4  626.60   44.35
  -4  17   4  149.20   11.72
   4 -17  -4  160.20   12.49
  -4  18   4  395.10   28.45
   4 -18  -4  407.40   29.20
  -4  19   4   31.98    4.87
   4 -19  -4   22.13    4.29
  -4  20   4   93.82    8.46
  -4  21   4  227.90   17.15
  -4  22   4   31.20    4.65
  -4  23   4  125.80    9.93
  -4  24   4   16.84    3.94
  -4  25   4   29.75    4.53
  -4  26   4   44.63    4.93
  -4  27   4  123.40    9.86
  -4  28   4   49.12    5.10
  -4  29   4  236.60   17.37
  -4  30   4  108.60    8.71
  -4  31   4   31.84    4.26
   4  31  -3   30.93    4.03
   4  30  -3   53.09    5.55
   4  29  -3   36.05    4.85
   4  28  -3  268.00   19.57
   4  27  -3    2.45    3.57
   4  26  -3   84.58    7.56
   4  25  -3   12.59    3.33
   4  24  -3  113.00    9.28
   4  23  -3    7.34    3.65
   4  22  -3  266.10   19.55
   4  21  -3   15.18    4.01
   4  20  -3   73.04    6.92
   4  19  -3   79.86    7.41
   4  18  -3   13.25    3.70
   4  17  -3  255.10   18.63
   4  16  -3  234.20   17.28
   4  15  -3   21.12    3.53
   4  14  -3   68.47    6.11
   4   9  -3  927.60   64.69
   4   8  -3 5191.00  359.10
   4   7  -3  958.90   66.73
   4   6  -3 2288.00  158.50
   4   5  -3  348.30   24.57
   4   4  -3 5305.00  366.80
  -4  -3   3  100.90    7.72
   4   3  -3  103.60    7.73
  -4  -2   3  257.90   18.32
   4   2  -3  266.20   18.79
  -4  -1   3  251.70   17.87
   4   1  -3  283.30   20.00
  -4   0   3   -1.17    2.02
   4   0  -3    3.19    2.02
  -4   1   3  257.90   18.40
   4  -1  -3  257.80   18.30
  -4   2   3  225.30   16.24
   4  -2  -3  276.60   19.65
  -4   3   3   90.86    7.19
   4  -3  -3   62.84    5.29
  -4   4   3 5664.00  391.70
   4  -4  -3 4797.00  331.80
  -4   5   3  350.50   24.86
   4  -5  -3  372.50   26.38
  -4   6   3 3143.00  217.70
   4  -6  -3 2270.00  157.40
  -4   7   3  948.20   66.18
   4  -7  -3 1021.00   71.19
  -4   8   3 5149.00  356.30
   4  -8  -3 4896.00  338.90
  -4   9   3 1063.00   74.13
   4  -9  -3  855.60   59.88
  -4  10   3  166.10   12.67
   4 -10  -3  148.50   11.42
  -4  11   3 2502.00  173.60
   4 -11  -3 2600.00  180.40
  -4  12   3   92.97    7.61
   4 -12  -3   95.75    8.01
  -4  13   3  394.90   28.40
   4 -13  -3  370.30   26.54
  -4  14   3   69.60    6.28
   4 -14  -3   85.58    7.57
  -4  15   3   25.87    4.15
   4 -15  -3   26.89    4.06
  -4  16   3  220.00   16.46
  -4  17   3  238.40   17.76
  -4  18   3    5.25    3.88
  -4  19   3   58.99    5.93
  -4  20   3   78.04    7.19
  -4  21   3   13.53    4.53
  -4  22   3  287.40   21.32
  -4  23   3    8.46    3.75
  -4  24   3  114.10    9.46
  -4  25   3    6.49    3.31
  -4  26   3  102.40    8.78
  -4  27   3    8.45    3.77
  -4  28   3  275.90   20.04
  -4  29   3   40.18    4.95
  -4  30   3   75.80    6.88
  -4  31   3   38.28    4.40
   4  31  -2   51.54    5.51
   4  30  -2   -3.75    3.49
   4  29  -2   -0.17    3.54
   4  28  -2   28.75    4.42
   4  27  -2   27.50    4.50
   4  26  -2  298.30   21.64
   4  25  -2   17.79    4.01
   4  24  -2   58.39    6.07
   4  23  -2   27.55    4.76
   4  22  -2  497.00   35.40
   4  21  -2  384.30   27.70
   4  20  -2   81.37    7.26
   4  19  -2   63.87    6.26
   4  18  -2   58.22    5.67
   4  17  -2  302.40   21.84
   4  16  -2   58.79    5.65
   4  15  -2  843.10   58.98
   4  14  -2   65.42    5.80
   4  13  -2   65.90    5.85
   4  12  -2  447.40   31.58
   4  11  -2  204.10   14.86
   4  10  -2 1452.00  100.80
   4   9  -2  223.70   16.07
   4   7  -2 1803.00  124.90
   4   6  -2  233.20   16.56
   4   5  -2 2511.00  173.80
   4   4  -2  285.90   20.01
   4   3  -2   14.01    1.70
  -4  -2   2 1161.00   80.44
   4   2  -2 1285.00   89.02
  -4  -1   2  534.60   37.19
   4   1  -2  352.90   24.62
  -4   0   2   48.19    3.93
   4   0  -2   56.01    4.34
  -4   1   2  458.90   32.04
   4  -1  -2  514.80   35.89
  -4   2   2 1354.00   93.91
   4  -2  -2  856.40   59.53
  -4   3   2   19.75    2.91
   4  -3  -2   18.94    2.79
  -4   4   2  279.10   19.94
   4  -4  -2  295.20   20.96
  -4   5   2 2222.00  154.00
   4  -5  -2 2592.00  179.50
  -4   6   2  159.40   11.84
   4  -6  -2  207.20   15.06
  -4   7   2 1983.00  137.60
   4  -7  -2 1559.00  108.20
  -4   8   2   29.85    4.04
   4  -8  -2   45.15    4.72
  -4   9   2  206.70   15.27
   4  -9  -2  178.30   13.29
  -4  10   2 1605.00  111.60
   4 -10  -2 1559.00  108.50
  -4  11   2  216.80   16.09
  -4  12   2  471.00   33.47
  -4  13   2   61.82    6.05
  -4  14   2   79.60    7.34
  -4  15   2  763.70   53.66
  -4  16   2   63.41    6.08
  -4  17   2  322.60   23.43
  -4  18   2   83.41    7.56
  -4  19   2   80.40    7.18
  -4  20   2   71.59    6.88
  -4  21   2  363.50   26.22
  -4  22   2  523.70   37.35
  -4  23   2   19.59    4.55
  -4  24   2   63.02    6.09
  -4  25   2    9.21    3.72
  -4  26   2  289.30   21.06
  -4  27   2   35.86    4.31
  -4  28   2   27.49    4.16
  -4  29   2    0.76    4.05
  -4  30   2   -2.08    3.49
  -4  31   2   40.53    4.53
   4  31  -1    2.54    3.58
   4  30  -1   42.54    5.13
   4  29  -1    3.46    3.11
   4  28  -1   -0.12    3.11
   4  27  -1  574.10   40.49
   4  26  -1   18.48    3.90
   4  25  -1  443.10   31.57
   4  24  -1   12.68    3.69
   4  23  -1  952.50   66.71
   4  22  -1   19.09    4.18
   4  21  -1  149.50   11.74
   4  20  -1    4.30    3.47
   4  19  -1  378.20   27.13
   4  18  -1  467.90   33.27
   4  17  -1  121.20    9.62
   4  16  -1   29.95    3.96
   4  15  -1    5.52    2.98
   4  14  -1  158.90   11.86
   4  13  -1  357.40   25.38
   4  12  -1   70.06    5.82
   4  11  -1  179.20   13.11
   4  10  -1  156.80   11.54
   4   9  -1 1357.00   94.19
   4   8  -1  132.30    9.68
   4   7  -1 2024.00  140.20
   4   6  -1  614.30   42.71
   4   5  -1  509.30   35.42
   4   5  -1  397.00   27.64
  -4   0   1    0.20    1.07
  -4   1   1 2525.00  174.80
  -4   2   1  382.20   26.76
  -4   3   1 1120.00   77.80
  -4   4   1  314.50   22.35
  -4   5   1  484.50   34.09
  -4   6   1  543.40   38.16
  -4   7   1 1672.00  116.20
  -4   8   1  170.80   12.82
  -4   9   1 1402.00   97.55
  -4  10   1  174.50   13.06
  -4  11   1  182.40   13.84
  -4  12   1   51.55    5.57
  -4  13   1  420.50   30.04
  -4  14   1  182.20   14.03
  -4  15   1    3.12    3.30
  -4  16   1   39.58    5.13
  -4  17   1  141.50   11.23
  -4  18   1  506.80   35.99
  -4  19   1  424.60   30.47
  -4  20   1    7.00    3.56
  -4  21   1  183.60   13.94
  -4  22   1   29.32    4.64
  -4  23   1  940.90   66.06
  -4  24   1   12.22    4.25
  -4  25   1  435.50   30.96
  -4  26   1   14.57    2.97
  -4  27   1  606.80   42.87
  -4  28   1    2.78    3.21
  -4  29   1    8.22    3.85
  -4  30   1   50.02    5.26
  -4  31   1    2.90    3.42
   4  31   0   18.53    4.13
   4  30   0   16.68    4.04
   4  29   0   16.89    3.94
   4  28   0  146.80   11.40
   4  27   0   37.48    4.90
   4  26   0  589.60   41.64
   4  25   0    1.75    3.41
   4  24   0 1002.00   70.11
   4  23   0    7.69    3.79
   4  22   0  343.10   24.79
   4  21   0   93.86    8.14
   4  20   0  136.50   10.81
   4  19   0    9.41    3.35
   4  18   0   60.21    5.87
   4  17   0   26.10    3.92
   4  16   0   14.88    3.26
   4  15   0  413.40   29.39
   4  14   0   -2.09    2.48
   4  13   0  212.20   15.40
   4  12   0  672.90   47.06
   4  11   0  125.10    9.42
   4  10   0  716.20   49.97
   4   9   0  196.80   14.14
   4   8   0   29.18    2.97
   4   7   0  100.00    7.38
   4   6   0   20.59    2.14
   4   5   0  502.20   34.93
   4   4   0  876.70   61.01
  -4  -1   0  489.50   34.05
  -4  -1   0  491.20   34.18
  -4   0   0  622.50   43.25
  -4   0   0  787.50   54.66
  -4   1   0  355.10   24.84
  -4   2   0 1532.00  106.20
  -4   3   0  619.20   43.26
  -4   4   0  797.90   55.66
  -4   5   0  494.80   34.78
  -4   6   0   14.73    3.01
  -4   7   0   95.20    7.75
  -4   8   0   25.84    3.71
  -4   9   0  246.70   18.00
  -4  10   0  861.00   60.28
  -4  11   0  119.40    9.74
  -4  12   0  637.70   45.01
  -4  13   0  212.90   15.95
  -4  14   0    2.21    3.64
  -4  15   0  392.10   28.24
  -4  16   0   10.64    4.08
  -4  17   0   21.50    4.28
  -4  18   0   59.80    6.08
  -4  19   0   11.53    3.59
  -4  20   0  158.10   12.11
  -4  21   0  105.90    8.75
  -4  22   0  344.40   24.83
  -4  23   0   16.02    3.34
  -4  24   0  916.00   64.22
  -4  25   0   -6.83    3.08
  -4  26   0  549.70   38.73
  -4  27   0   26.61    4.18
  -4  28   0  125.60    9.64
  -4  29   0   15.23    3.11
  -4  30   0   15.61    3.30
  -4  31   0   15.64    3.32
   4  31   1    0.63    3.95
   4  30   1  105.50    8.69
   4  29   1  141.10   11.07
   4  28   1  177.90   13.49
   4  27   1   13.03    3.58
   4  26   1  121.90    9.75
   4  25   1  365.80   26.23
   4  24   1  137.50   10.79
   4  23   1  400.70   28.67
   4  22   1    1.44    3.25
   4  21   1    7.67    3.29
   4  20   1    9.44    3.50
   4  19   1   81.47    7.15
   4  18   1    7.73    3.28
   4  17   1   31.48    4.11
   4  16   1   17.96    3.53
   4  15   1   94.43    7.73
   4  14   1  102.40    8.20
   4  13   1  358.30   25.48
   4  12   1  108.70    8.44
  -4 -11  -1   32.02    3.62
   4  11   1   24.82    3.20
  -4 -10  -1  110.70    8.35
   4  10   1   83.83    6.68
  -4  -9  -1   43.46    3.94
   4   9   1   38.03    3.70
  -4  -8  -1 1529.00  106.00
   4   8   1 1507.00  104.50
  -4  -7  -1  176.10   12.57
   4   7   1  165.10   11.91
  -4  -6  -1 1226.00   84.99
   4   6   1 1318.00   91.40
  -4  -5  -1 1589.00  110.10
   4   5   1 1420.00   98.44
  -4  -4  -1 1061.00   73.53
   4   4   1  940.60   65.28
  -4  -3  -1  650.10   45.17
   4   3   1  598.90   41.67
  -4  -2  -1   60.81    4.65
  -4  -1  -1  220.10   15.54
  -4   0  -1    3.27    1.98
  -4   1  -1  217.60   15.55
  -4   2  -1   56.67    5.07
  -4   9  -1   37.79    4.13
  -4  10  -1   98.90    8.32
  -4  11  -1   24.16    4.01
  -4  12  -1  122.10    9.78
  -4  13  -1  425.00   30.46
  -4  14  -1   85.59    7.60
  -4  15  -1  105.10    8.88
  -4  16  -1   15.09    4.26
  -4  17  -1   27.67    4.71
  -4  18  -1   11.40    3.77
  -4  19  -1  102.70    8.60
  -4  20  -1    6.29    3.87
  -4  21  -1    5.95    3.90
  -4  22  -1   11.75    3.99
  -4  23  -1  346.40   25.01
  -4  24  -1  113.80    9.28
  -4  25  -1  335.80   24.09
  -4  26  -1  134.00   10.43
  -4  27  -1    5.65    3.65
  -4  28  -1  129.50   10.22
  -4  29  -1  118.70    9.64
  -4  30  -1   90.74    7.49
  -4  31  -1    5.62    2.90
   4  30   2   -3.13    3.80
   4  29   2  167.90   12.92
   4  28   2   24.27    4.41
   4  27   2   74.87    6.92
   4  26   2    8.71    3.47
   4  25   2   75.94    6.76
   4  24   2   10.06    3.55
   4  23   2   69.27    6.46
   4  22   2   30.16    4.33
   4  21   2   -0.12    3.14
   4  20   2  222.10   16.49
   4  19   2  140.50   11.09
   4  18   2  383.10   27.41
   4  17   2  732.00   51.44
   4  16   2  289.70   20.92
  -4 -15  -2  279.40   20.18
   4  15   2  285.80   20.65
  -4 -14  -2 2037.00  141.40
   4  14   2 1897.00  131.70
  -4 -13  -2  826.30   57.79
   4  13   2  723.70   50.74
  -4 -12  -2 1134.00   78.98
   4  12   2 1207.00   84.03
  -4 -11  -2   29.76    3.66
   4  11   2   22.86    3.21
  -4 -10  -2 2481.00  171.90
   4  10   2 2824.00  195.60
  -4  -9  -2  614.10   42.92
   4   9   2  645.70   45.17
  -4  -8  -2 2089.00  144.80
   4   8   2 2177.00  150.90
  -4  -7  -2 2192.00  151.80
   4   7   2 2501.00  173.20
  -4  -6  -2  263.20   18.65
   4   6   2  306.40   21.67
  -4  -5  -2    2.90    1.84
   4   5   2    7.51    2.04
  -4  -4  -2  964.50   66.99
   4   4   2 1180.00   81.97
  -4  -3  -2  136.90   10.02
   4   3   2  150.30   11.03
  -4  -2  -2 3281.00  227.00
   4   2   2 3201.00  221.60
  -4  -1  -2  643.10   44.90
  -4   0  -2 2007.00  139.10
  -4   1  -2  509.90   35.78
  -4   2  -2 3455.00  239.20
  -4   3  -2  160.50   11.91
  -4   4  -2  771.70   53.98
  -4   5  -2    5.76    3.46
  -4  14  -2 1702.00  118.40
  -4  15  -2  353.20   25.67
  -4  16  -2  316.10   23.07
  -4  17  -2  749.20   52.86
  -4  18  -2  409.90   29.49
  -4  19  -2  152.30   12.04
  -4  20  -2  238.40   17.75
  -4  21  -2    1.01    3.28
  -4  22  -2   25.92    4.41
  -4  23  -2   79.38    7.20
  -4  24  -2   18.59    3.30
  -4  25  -2   72.85    6.81
  -4  26  -2    7.86    3.57
  -4  27  -2   81.65    7.23
  -4  28  -2   13.74    3.21
  -4  29  -2  148.60   11.49
  -4  30  -2   -1.43    3.45
   4  30   3   27.29    4.82
   4  29   3   19.10    4.25
   4  28   3   13.10    3.98
   4  27   3   25.25    4.61
   4  26   3   60.50    6.21
   4  25   3  150.50   11.76
   4  24   3   60.37    5.95
   4  23   3  120.70    9.78
   4  22   3  363.40   26.05
   4  21   3    1.04    3.37
   4  20   3  125.30   10.10
   4  19   3   25.08    4.20
  -4 -18  -3  248.50   18.12
   4  18   3  261.40   19.09
  -4 -17  -3  196.00   14.52
   4  17   3  187.10   14.03
  -4 -16  -3  211.70   15.62
   4  16   3  204.90   15.26
  -4 -15  -3  162.20   12.23
   4  15   3  154.60   11.77
  -4 -14  -3  326.10   23.36
   4  14   3  328.50   23.60
  -4 -13  -3 2317.00  160.70
   4  13   3 2278.00  158.00
  -4 -12  -3  415.00   29.46
   4  12   3  423.20   30.06
  -4 -11  -3  652.80   45.87
   4  11   3  634.60   44.59
  -4 -10  -3   21.35    3.21
   4  10   3   17.76    3.05
  -4  -9  -3  268.20   19.28
   4   9   3  279.70   20.06
  -4  -8  -3   18.11    2.96
   4   8   3   16.54    3.02
  -4  -7  -3  733.90   51.24
   4   7   3  741.90   51.82
  -4  -6  -3  692.80   48.37
   4   6   3  609.90   42.70
  -4  -5  -3  155.60   11.40
   4   5   3  169.10   12.44
  -4  -4  -3  133.00    9.90
   4   4   3  130.70    9.88
  -4  -3  -3  505.60   35.48
   4   3   3  525.70   36.92
  -4  -2  -3 1174.00   81.61
   4   2   3 1191.00   82.83
  -4  -1  -3   -0.79    2.16
   4   1   3    2.21    2.87
  -4   0  -3    2.82    2.35
  -4   1  -3   -3.78    2.38
  -4   2  -3 1089.00   75.87
  -4   3  -3  448.40   31.76
  -4   4  -3  124.30    9.79
  -4   5  -3  164.50   12.61
  -4   6  -3  564.10   39.87
  -4   7  -3  783.10   54.91
  -4   8  -3   11.15    3.59
  -4  17  -3  175.40   13.49
  -4  18  -3  281.00   20.67
  -4  19  -3   26.96    4.74
  -4  20  -3  132.80   10.65
  -4  21  -3   21.46    4.21
  -4  22  -3  318.70   22.97
  -4  23  -3  143.80   11.09
  -4  24  -3   72.76    6.95
  -4  25  -3  155.50   11.90
  -4  26  -3   54.30    5.50
  -4  27  -3   19.83    4.30
  -4  28  -3   11.23    2.71
  -4  29  -3   12.34    3.74
  -4  30  -3   10.33    3.55
   4  29   4   26.24    5.03
   4  28   4    7.26    3.98
   4  27   4   48.67    5.62
   4  26   4    0.84    3.75
   4  25   4   25.83    4.41
   4  24   4  353.30   25.37
   4  23   4   24.30    4.00
   4  22   4    3.85    3.46
  -4 -21  -4   31.84    3.87
   4  21   4   24.95    4.22
  -4 -20  -4    2.39    2.80
   4  20   4    1.21    3.62
  -4 -19  -4  127.80    9.94
   4  19   4  136.80   10.86
  -4 -18  -4   34.94    4.24
   4  18   4   28.13    4.23
  -4 -17  -4  144.00   11.07
   4  17   4  148.40   11.49
  -4 -16  -4  833.20   58.33
   4  16   4  821.50   57.64
  -4 -15  -4   45.19    4.61
   4  15   4   31.24    4.44
  -4 -14  -4  678.60   47.65
   4  14   4  702.30   49.34
  -4 -13  -4    4.98    2.83
   4  13   4    5.67    3.01
  -4 -12  -4 2037.00  141.40
   4  12   4 2140.00  148.50
  -4 -11  -4   29.66    3.78
   4  11   4   34.08    4.07
  -4 -10  -4  735.00   51.51
   4  10   4  666.60   46.86
  -4  -9  -4    2.74    2.90
   4   9   4    1.37    2.97
  -4  -8  -4 1982.00  137.60
   4   8   4 1948.00  135.20
  -4  -7  -4   55.55    5.17
   4   7   4   53.56    4.90
  -4  -6  -4   37.81    4.25
   4   6   4   38.28    4.06
  -4  -5  -4  575.50   40.49
   4   5   4  595.90   41.83
  -4  -4  -4   27.50    3.74
   4   4   4   28.57    3.74
  -4  -3  -4   65.59    5.93
   4   3   4   71.32    6.19
  -4  -2  -4  355.20   25.38
   4   2   4  396.90   28.15
  -4  -1  -4  145.50   11.02
   4   1   4  162.30   12.17
  -4   0  -4  536.60   37.80
   4   0   4  456.20   32.23
  -4   1  -4  145.60   11.00
  -4   2  -4  334.90   23.90
  -4   3  -4   64.99    6.17
  -4   4  -4   19.43    3.86
  -4   5  -4  556.50   39.38
  -4   6  -4   33.30    4.51
  -4   7  -4   66.51    6.36
  -4   8  -4 1936.00  134.60
  -4   9  -4   -0.82    4.06
  -4  10  -4  635.80   44.83
  -4  11  -4   18.69    4.49
  -4  12  -4 1795.00  124.90
  -4  13  -4    9.30    4.42
  -4  19  -4  144.80   11.57
  -4  20  -4    3.58    3.78
  -4  21  -4   17.72    3.77
  -4  22  -4    4.77    3.65
  -4  23  -4   24.75    3.87
  -4  24  -4  350.80   25.26
  -4  25  -4   30.45    4.04
  -4  26  -4   -1.31    3.59
  -4  27  -4   28.03    4.15
  -4  28  -4    7.64    3.54
  -4  29  -4   38.01    4.46
   4  28   5   55.82    6.19
   4  27   5   20.12    4.34
   4  26   5  164.80   12.61
   4  25   5   11.28    3.71
   4  24   5   38.79    4.80
  -4 -23  -5   16.32    3.19
   4  23   5   10.44    3.76
  -4 -22  -5  119.90    9.45
   4  22   5  123.50    9.86
  -4 -21  -5   66.21    6.17
   4  21   5   74.51    6.78
  -4 -20  -5   96.31    7.97
   4  20   5   81.95    7.42
  -4 -19  -5   45.02    4.87
   4  19   5   47.47    5.31
  -4 -18  -5  138.10   10.68
   4  18   5  157.30   12.13
  -4 -17  -5  916.90   64.09
   4  17   5  957.80   67.03
  -4 -16  -5    4.38    2.98
   4  16   5    1.23    3.49
  -4 -15  -5 1209.00   84.27
   4  15   5 1204.00   84.02
  -4 -14  -5   52.37    5.19
   4  14   5   52.47    5.39
  -4 -13  -5  516.00   36.46
   4  13   5  538.20   38.10
  -4 -12  -5   23.84    3.44
   4  12   5   23.69    3.77
  -4 -11  -5 2253.00  156.30
   4  11   5 2353.00  163.30
  -4 -10  -5  391.80   27.89
   4  10   5  422.30   30.09
  -4  -9  -5 1588.00  110.40
   4   9   5 1650.00  114.80
  -4  -8  -5  393.20   27.93
   4   8   5  425.60   30.29
  -4  -7  -5  506.40   35.69
   4   7   5  493.20   34.94
  -4  -6  -5  678.30   47.58
   4   6   5  723.00   50.74
  -4  -5  -5  658.10   46.16
   4   5   5  686.00   48.16
  -4  -4  -5   19.17    3.31
   4   4   5   18.27    3.64
  -4  -3  -5  271.20   19.55
   4   3   5  296.40   21.37
  -4  -2  -5  527.20   37.15
   4   2   5  577.70   40.70
  -4  -1  -5  184.40   13.75
   4   1   5  174.60   13.17
  -4   0  -5   -2.39    2.84
   4   0   5   -3.30    3.28
  -4   1  -5  193.00   14.42
  -4   2  -5  581.50   41.09
  -4   3  -5  317.60   22.97
  -4   4  -5   12.84    3.78
  -4   5  -5  631.60   44.47
  -4   6  -5  644.50   45.42
  -4   7  -5  471.20   33.65
  -4   8  -5  389.00   28.02
  -4   9  -5 1294.00   90.28
  -4  10  -5  374.40   27.01
  -4  11  -5 2269.00  157.70
  -4  12  -5   17.62    5.43
  -4  13  -5  511.70   36.57
  -4  14  -5   52.90    6.37
  -4  15  -5 1128.00   78.96
  -4  16  -5    3.72    4.71
  -4  17  -5  886.60   62.24
  -4  18  -5  141.00   11.60
  -4  19  -5   37.94    5.90
  -4  20  -5   73.31    7.57
  -4  21  -5   65.55    6.36
  -4  21  -5   57.58    6.83
  -4  22  -5  127.50   10.02
  -4  22  -5  147.40   11.97
  -4  24  -5   50.81    5.47
  -4  24  -5   55.72    6.67
  -4  25  -5    1.56    3.02
  -4  25  -5   -0.12    4.60
  -4  26  -5  196.50   15.18
  -4  26  -5  151.00   11.75
  -4  28  -5   40.89    5.86
  -4  28  -5   33.38    4.41
   4  27   6  100.20    8.60
   4  26   6   34.22    4.80
   4  25   6  206.80   15.41
  -4 -24  -6   17.05    3.63
   4  24   6   17.04    4.30
  -4 -23  -6   -2.55    3.17
   4  23   6   -1.12    3.38
  -4 -22  -6    6.63    3.12
   4  22   6    6.97    3.68
  -4 -21  -6   14.48    3.39
   4  21   6   12.35    3.86
  -4 -20  -6   70.15    6.24
   4  20   6   65.08    6.28
  -4 -19  -6    6.39    3.30
   4  19   6    5.07    3.73
  -4 -18  -6   29.11    3.94
   4  18   6   27.23    4.20
  -4 -17  -6  187.60   13.99
   4  17   6  183.70   13.86
  -4 -16  -6    4.86    2.92
   4  16   6    5.65    3.64
  -4 -15  -6  367.00   26.21
   4  15   6  327.40   23.66
  -4 -14  -6   15.26    3.26
   4  14   6   18.62    3.65
  -4 -13  -6  108.90    8.73
   4  13   6  128.30   10.26
  -4 -12  -6  203.50   15.06
   4  12   6  191.40   14.40
  -4 -11  -6  408.30   29.05
   4  11   6  397.40   28.39
  -4 -10  -6  275.60   19.96
   4  10   6  304.10   21.98
  -4  -9  -6    4.07    2.68
   4   9   6    7.93    3.00
  -4  -8  -6   78.60    6.66
   4   8   6   82.29    7.05
  -4  -7  -6  451.70   32.01
   4   7   6  491.80   34.86
  -4  -6  -6  177.60   13.23
   4   6   6  149.90   11.61
  -4  -5  -6  409.60   29.15
   4   5   6  461.30   32.80
  -4  -4  -6   13.41    3.28
   4   4   6    4.32    3.65
  -4  -3  -6   18.07    3.72
   4   3   6   24.49    4.30
  -4  -2  -6   25.52    3.90
   4   2   6   31.57    4.50
  -4  -1  -6    5.40    3.20
   4   1   6    7.28    3.67
  -4   0  -6    9.54    3.53
   4   0   6   12.35    3.96
  -4   1  -6    2.21    3.05
   4  -1   6   10.80    3.67
  -4   2  -6   31.56    4.36
  -4   3  -6   10.19    3.31
  -4   4  -6    4.31    3.05
  -4   5  -6  418.20   29.92
  -4   6  -6  164.10   12.76
  -4   7  -6  506.40   36.05
  -4   8  -6   96.87    8.63
  -4   9  -6   -3.48    4.28
  -4  10  -6  322.80   23.63
  -4  11  -6  418.40   30.29
  -4  12  -6  203.40   15.72
  -4  13  -6   78.97    7.92
  -4  14  -6    6.14    5.03
  -4  15  -6  322.00   23.52
  -4  16  -6    4.26    4.32
  -4  17  -6  178.30   14.07
  -4  18  -6   29.56    5.55
  -4  19  -6   -4.15    4.82
  -4  20  -6   67.21    7.40
  -4  21  -6   10.31    4.90
  -4  22  -6    6.42    2.55
  -4  22  -6   12.69    4.95
  -4  23  -6   -0.92    3.53
  -4  23  -6   -2.72    5.26
  -4  24  -6   18.53    3.56
  -4  24  -6   24.14    5.30
  -4  25  -6  214.50   16.26
  -4  25  -6  211.50   15.65
  -4  26  -6   26.95    4.03
  -4  26  -6   23.45    5.50
  -4  27  -6   70.15    6.12
  -4  27  -6   75.61    7.82
  -4 -25  -7   42.77    4.80
   4  25   7   49.29    5.51
  -4 -24  -7    2.73    3.20
   4  24   7    6.08    3.81
  -4 -23  -7   48.81    5.16
   4  23   7   47.36    5.31
  -4 -22  -7  183.10   13.67
   4  22   7  204.20   15.29
  -4 -21  -7  172.10   12.95
   4  21   7  179.90   13.58
  -4 -20  -7  103.80    8.48
   4  20   7  126.50   10.14
  -4 -19  -7  369.00   26.40
   4  19   7  487.80   34.63
  -4 -18  -7   11.41    3.23
   4  18   7    6.21    3.45
  -4 -17  -7   16.72    3.45
   4  17   7   15.75    4.08
  -4 -16  -7  364.80   26.03
   4  16   7  358.00   25.82
  -4 -15  -7   41.34    4.57
   4  15   7   43.08    4.91
  -4 -14  -7   78.17    6.71
   4  14   7   86.37    7.50
  -4 -13  -7   57.29    5.39
   4  13   7   49.06    5.34
  -4 -12  -7  103.30    8.27
   4  12   7  101.30    8.37
  -4 -11  -7   47.46    4.95
   4  11   7   60.67    6.02
  -4 -10  -7   84.15    7.13
   4  10   7   69.08    6.51
  -4  -9  -7   27.80    3.92
   4   9   7   30.95    4.43
  -4  -8  -7  542.30   38.33
   4   8   7  559.30   39.60
  -4  -7  -7  631.00   44.48
   4   7   7  546.10   38.72
  -4  -6  -7  287.20   20.92
   4   6   7  258.20   19.01
  -4  -5  -7 1066.00   74.52
   4   5   7 1054.00   73.68
  -4  -4  -7   42.61    5.08
   4   4   7   47.49    5.34
  -4  -3  -7    5.45    3.31
   4   3   7   12.28    3.58
  -4  -2  -7  545.80   38.63
   4   2   7  538.90   38.14
  -4  -1  -7  445.00   31.68
   4   1   7  453.90   32.30
  -4   0  -7    2.42    2.88
   4   0   7    2.40    3.48
  -4   1  -7  474.20   33.62
   4  -1   7  432.20   30.84
  -4   2  -7  534.00   37.74
  -4   3  -7    6.12    3.08
  -4   4  -7   37.02    4.58
  -4   5  -7 1114.00   77.87
  -4   6  -7  297.10   21.69
  -4   7  -7  679.80   47.88
  -4   8  -7  565.20   40.09
  -4   9  -7   35.33    5.62
  -4  10  -7   93.98    8.81
  -4  11  -7   61.34    6.76
  -4  12  -7   94.20    8.74
  -4  13  -7   60.65    7.07
  -4  14  -7   84.96    8.12
  -4  15  -7   41.03    6.06
  -4  16  -7  326.10   23.88
  -4  17  -7   16.43    5.40
  -4  18  -7   15.33    4.94
  -4  19  -7  455.80   32.63
  -4  20  -7   96.31    8.51
  -4  21  -7  163.90   12.96
  -4  22  -7  211.60   16.21
  -4  23  -7   41.93    6.05
  -4  24  -7   -6.96    3.14
  -4  24  -7   -3.57    5.18
  -4  25  -7   51.36    5.10
  -4  25  -7   32.58    5.95
  -4 -24  -8  129.10   10.08
   4  24   8  139.50   11.09
  -4 -23  -8    9.91    3.59
   4  23   8    7.19    4.14
  -4 -22  -8  361.40   25.77
   4  22   8  388.60   27.85
  -4 -21  -8   20.08    3.79
   4  21   8    6.71    3.91
  -4 -20  -8  460.50   32.58
   4  20   8  443.70   31.69
  -4 -19  -8   22.72    3.85
   4  19   8   10.02    3.76
  -4 -18  -8  195.80   14.60
   4  18   8  204.20   15.25
  -4 -17  -8   -0.37    3.04
   4  17   8   -1.34    3.38
  -4 -16  -8    3.97    2.90
   4  16   8    3.99    3.15
  -4 -15  -8   30.84    4.03
   4  15   8   17.30    3.85
  -4 -14  -8   -0.12    2.90
   4  14   8   -4.00    3.47
  -4 -13  -8   27.36    3.75
   4  13   8   26.77    4.18
  -4 -12  -8   53.78    5.30
   4  12   8   24.23    4.26
  -4 -11  -8  334.20   23.98
   4  11   8  329.90   23.86
  -4 -10  -8  116.20    9.24
   4  10   8  110.40    9.09
  -4  -9  -8   18.09    3.52
   4   9   8   31.99    4.52
  -4  -8  -8   28.94    4.00
   4   8   8   24.89    4.41
  -4  -7  -8   99.77    8.38
   4   7   8  115.20    9.47
  -4  -6  -8  993.10   69.49
   4   6   8  976.00   68.29
  -4  -5  -8   88.87    7.64
   4   5   8   87.96    7.65
  -4  -4  -8  254.00   18.66
   4   4   8  278.00   20.36
  -4  -3  -8  604.00   42.62
   4   3   8  588.50   41.61
  -4  -2  -8  200.50   14.97
   4   2   8  219.50   16.35
  -4  -1  -8   53.42    5.40
   4   1   8   51.34    5.55
  -4   0  -8  324.40   23.38
   4   0   8  286.20   20.86
  -4   1  -8   57.54    5.59
   4  -1   8   64.39    6.22
  -4   2  -8  210.40   15.68
  -4   3  -8  584.10   41.30
  -4   4  -8  277.90   20.25
  -4   5  -8   69.69    6.45
  -4   6  -8  808.00   56.67
  -4   7  -8   83.59    7.47
  -4   8  -8   19.38    3.93
  -4   9  -8   36.59    5.33
  -4  10  -8  126.00   10.47
  -4  11  -8  368.10   26.66
  -4  12  -8   51.90    6.27
  -4  13  -8   35.01    5.77
  -4  14  -8   -0.92    4.34
  -4  15  -8   32.95    5.36
  -4  16  -8   -0.41    4.93
  -4  17  -8    1.55    4.41
  -4  18  -8  209.30   16.13
  -4  19  -8   17.63    5.03
  -4  20  -8  418.70   30.09
  -4  21  -8   15.14    5.53
  -4  22  -8  407.70   29.37
  -4  23  -8    7.94    4.87
  -4  24  -8  101.20    9.06
  -4 -22  -9   26.54    4.05
   4  22   9   18.47    4.31
  -4 -21  -9   66.81    6.24
   4  21   9   62.70    6.32
  -4 -20  -9    8.59    3.57
   4  20   9    1.22    3.74
  -4 -19  -9   22.94    3.88
   4  19   9   26.87    4.55
  -4 -18  -9   -2.83    3.09
   4  18   9    9.04    3.70
  -4 -17  -9   97.78    8.03
   4  17   9  109.50    9.03
  -4 -16  -9   34.09    4.28
   4  16   9   35.78    4.78
  -4 -15  -9   20.59    3.88
   4  15   9   13.42    3.79
  -4 -14  -9    3.89    2.98
   4  14   9   -4.13    3.22
  -4 -13  -9   75.09    6.56
   4  13   9   72.45    6.58
  -4 -12  -9   80.27    6.96
   4  12   9   86.18    7.69
  -4 -11  -9  106.90    8.72
   4  11   9  103.10    8.67
  -4 -10  -9  336.90   24.24
   4  10   9  364.10   26.16
  -4  -9  -9  234.30   17.26
   4   9   9  202.70   15.28
  -4  -8  -9  125.30    9.91
   4   8   9  120.10    9.69
  -4  -7  -9    6.22    3.35
   4   7   9    4.93    3.53
  -4  -6  -9  491.10   34.87
   4   6   9  462.40   32.92
  -4  -5  -9   13.72    3.55
   4   5   9   14.81    3.86
  -4  -4  -9   91.06    7.76
   4   4   9  115.30    9.44
  -4  -3  -9  533.40   37.80
   4   3   9  531.70   37.72
  -4  -2  -9    3.85    3.21
   4   2   9   15.55    3.89
  -4  -1  -9  135.70   10.69
   4   1   9  143.60   11.23
  -4   0  -9   -0.24    3.18
   4   0   9    4.86    3.50
  -4   1  -9  141.40   11.14
  -4   2  -9    7.32    3.40
  -4   3  -9  524.80   37.19
  -4   4  -9   93.96    8.16
  -4   5  -9   18.05    3.85
  -4   6  -9  463.20   32.98
  -4   7  -9   13.47    3.76
  -4   8  -9  119.50    9.71
  -4   9  -9  227.30   16.93
  -4  10  -9  330.40   23.91
  -4  11  -9  109.60    9.12
  -4  12  -9   70.17    7.27
  -4  13  -9   72.86    7.57
  -4  14  -9   -4.71    4.55
  -4  15  -9   20.37    4.75
  -4  16  -9   32.92    5.37
  -4  17  -9  102.00    9.04
  -4  18  -9    4.13    4.88
  -4  19  -9   12.74    5.04
  -4  20  -9   -1.92    4.87
  -4  21  -9   58.41    6.73
  -4  22  -9   16.07    5.30
  -4 -20 -10    1.55    3.59
   4  20  10    0.78    4.13
  -4 -19 -10   35.06    4.70
   4  19  10   32.53    4.64
  -4 -18 -10   38.57    4.63
   4  18  10   40.39    5.04
  -4 -17 -10  110.00    8.95
   4  17  10  114.70    9.36
  -4 -16 -10  142.00   10.99
   4  16  10  146.90   11.44
  -4 -15 -10   25.46    4.08
   4  15  10   24.67    4.54
  -4 -14 -10   -1.82    2.85
   4  14  10   -5.76    3.58
  -4 -13 -10    0.28    3.29
   4  13  10    2.08    3.96
  -4 -12 -10   30.43    4.30
   4  12  10   39.55    4.98
  -4 -11 -10    0.15    2.94
   4  11  10    5.77    3.50
  -4 -10 -10    4.59    3.10
   4  10  10   10.37    3.65
  -4  -9 -10  601.60   42.34
   4   9  10  576.00   40.71
  -4  -8 -10  129.40   10.13
   4   8  10  144.00   11.26
  -4  -7 -10  873.40   61.19
   4   7  10  879.50   61.59
  -4  -6 -10   44.08    5.05
   4   6  10   32.68    4.62
  -4  -5 -10  152.60   11.76
   4   5  10  219.90   16.32
  -4  -4 -10  604.70   42.62
   4   4  10  576.30   40.69
  -4  -3 -10  132.10   10.37
   4   3  10  122.70    9.93
  -4  -2 -10  451.00   32.06
   4   2  10  439.50   31.39
  -4  -1 -10   -2.94    3.30
   4   1  10    3.00    3.59
  -4   0 -10  133.30   10.55
   4   0  10  141.70   11.15
  -4   1 -10   -4.42    3.29
  -4   2 -10  453.30   32.25
  -4   3 -10  144.80   11.26
  -4   4 -10  683.30   48.05
  -4   5 -10  181.10   13.82
  -4   6 -10   43.01    5.08
  -4   7 -10  998.80   69.88
  -4   8 -10  110.90    9.21
  -4   9 -10  588.40   41.56
  -4  10 -10   -2.28    3.47
  -4  11 -10   -0.82    3.44
  -4  12 -10   29.01    4.32
  -4  13 -10   -1.02    3.53
  -4  14 -10    1.04    3.69
  -4  15 -10   28.27    4.93
  -4  16 -10  132.10   10.82
  -4  17 -10  103.10    9.08
  -4  18 -10   49.66    6.17
  -4  19 -10   27.95    5.25
  -4 -17 -11   16.17    3.58
   4  17  11   18.51    4.59
  -4 -16 -11  154.30   11.74
   4  16  11  160.70   12.42
  -4 -15 -11  149.90   11.44
   4  15  11   76.65    7.29
  -4 -14 -11   12.89    3.60
   4  14  11   10.18    4.18
  -4 -13 -11  163.00   12.35
   4  13  11  138.40   10.84
  -4 -12 -11    0.77    3.40
   4  12  11    3.15    3.92
  -4 -11 -11  168.20   12.66
   4  11  11  104.50    8.84
  -4 -10 -11    5.65    3.33
   4  10  11   -1.52    3.62
  -4  -9 -11  164.00   12.52
   4   9  11  192.10   14.54
  -4  -8 -11  345.40   24.76
   4   8  11  351.80   25.31
  -4  -7 -11  279.80   20.26
   4   7  11  241.00   17.68
  -4  -6 -11   21.61    3.97
   4   6  11   12.75    3.71
  -4  -5 -11  279.40   20.26
   4   5  11  269.30   19.69
  -4  -4 -11   50.98    5.34
   4   4  11   35.67    4.60
  -4  -3 -11  123.20    9.86
   4   3  11  146.80   11.61
  -4  -2 -11  129.70   10.31
   4   2  11  127.70   10.33
  -4  -1 -11  262.00   19.19
   4   1  11  234.50   17.40
  -4   0 -11    0.99    3.40
  -4   1 -11  244.90   17.96
  -4   2 -11  109.60    8.93
  -4   3 -11  151.20   11.72
  -4   4 -11   45.29    5.17
  -4   5 -11  269.80   19.66
  -4   6 -11   23.24    4.13
  -4   7 -11  276.40   20.10
  -4   8 -11  361.90   25.98
  -4   9 -11  168.30   12.85
  -4  10 -11    3.97    3.50
  -4  11 -11  177.20   13.50
  -4  12 -11    1.86    3.34
  -4  13 -11  203.50   15.25
  -4  14 -11   16.99    3.81
  -4  15 -11  125.70    9.89
  -4  16 -11  156.00   11.95
  -4  17 -11   14.24    3.80
  -4 -13 -12   12.74    3.45
   4  13  12    5.05    4.34
  -4 -12 -12   43.75    5.03
   4  12  12   36.39    5.10
  -4 -11 -12    2.23    3.34
   4  11  12    5.04    4.17
  -4 -10 -12   28.22    4.30
   4  10  12   26.30    4.43
  -4  -9 -12   17.66    3.78
   4   9  12   16.24    4.22
  -4  -8 -12    3.90    3.39
   4   8  12    1.72    3.62
  -4  -7 -12   41.22    4.97
   4   7  12   38.74    4.85
  -4  -6 -12    6.31    3.43
   4   6  12   12.39    4.24
  -4  -5 -12   16.42    3.96
   4   5  12    9.07    3.92
  -4  -4 -12   30.44    4.17
   4   4  12   21.44    4.32
  -4  -3 -12   15.72    4.01
   4   3  12   18.93    4.38
  -4  -2 -12   47.24    5.41
   4   2  12   58.51    6.33
  -4  -1 -12    6.34    3.38
   4   1  12    2.77    3.33
  -4   0 -12    6.00    3.53
  -4   1 -12   -0.10    3.39
  -4   2 -12   43.18    5.09
  -4   3 -12   19.28    3.81
  -4   4 -12   23.49    3.88
  -4   5 -12    8.34    3.43
  -4   6 -12   11.62    3.68
  -4   7 -12   31.09    4.51
  -4   8 -12    3.98    3.50
  -4   9 -12   10.33    3.63
  -4  10 -12   35.78    4.64
  -4  11 -12    1.47    2.93
  -4  12 -12   44.86    5.02
  -4  13 -12    9.31    3.82
  -4  -7 -13   20.82    4.13
   4   7  13   30.88    5.27
  -4  -6 -13   32.44    4.44
   4   6  13   32.52    4.90
  -4  -5 -13    4.37    3.63
   4   5  13  -11.51    4.03
  -4  -4 -13    3.70    3.62
   4   4  13   -2.03    3.99
  -4  -3 -13   13.74    3.87
   4   3  13    9.34    4.09
  -4  -2 -13   19.29    3.96
   4   2  13   21.90    4.11
  -4  -1 -13    6.50    3.73
  -4   0 -13   -4.04    3.74
  -4   1 -13    3.03    3.73
  -4   2 -13   11.75    3.62
  -4   3 -13    9.09    3.89
  -4   4 -13   -0.16    3.15
  -4   5 -13   -3.68    3.18
  -4   6 -13   22.36    4.05
  -4   7 -13   22.83    4.15
   5   8 -16   14.28    3.93
   5   7 -16   -2.37    3.32
   5   6 -16   50.09    5.29
  -5  -5  16    4.65    3.91
   5   5 -16   -0.91    3.32
  -5  -4  16  382.80   27.38
   5   4 -16  379.80   27.08
  -5  -3  16    7.11    3.93
   5   3 -16    4.44    3.54
  -5  -2  16  356.00   25.55
   5   2 -16  399.80   28.48
  -5  -1  16   18.62    4.19
   5   1 -16   15.96    3.49
  -5   0  16  284.00   20.53
   5   0 -16  273.10   19.85
  -5   1  16   25.32    3.97
   5  -1 -16   27.80    4.34
  -5   2  16  336.60   24.02
   5  -2 -16  363.80   25.98
  -5   3  16   -3.02    3.34
   5  -3 -16    5.95    3.40
  -5   4  16  362.50   25.85
   5  -4 -16  411.10   29.16
  -5   5  16    0.68    3.68
   5  -5 -16   -1.22    3.31
  -5   6  16   42.00    5.17
   5  -6 -16   62.48    5.87
  -5   7  16    9.48    3.42
   5  -7 -16    4.57    3.32
  -5   8  16   11.94    3.59
   5  -8 -16    0.50    2.98
   5  13 -15   84.64    7.23
   5  12 -15    4.20    3.20
   5  11 -15   65.85    6.12
   5  10 -15   -1.63    3.19
   5   9 -15    0.75    3.21
   5   8 -15    7.31    3.36
   5   7 -15   93.05    7.84
  -5  -6  15   13.52    3.84
   5   6 -15   33.30    4.34
  -5  -5  15   36.43    4.93
   5   5 -15   41.95    5.00
  -5  -4  15    8.22    3.91
   5   4 -15    6.20    3.45
  -5  -3  15  126.00   10.26
   5   3 -15  128.10   10.16
  -5  -2  15   99.86    8.56
   5   2 -15   97.43    8.37
  -5  -1  15   70.45    6.79
   5   1 -15   71.78    6.81
  -5   0  15   12.18    3.97
   5   0 -15    5.46    3.55
  -5   1  15   70.68    6.76
   5  -1 -15   61.81    6.00
  -5   2  15  112.50    9.20
   5  -2 -15  100.80    8.26
  -5   3  15  150.30   11.66
   5  -3 -15  161.40   12.32
  -5   4  15    0.29    3.63
   5  -4 -15    1.90    3.29
  -5   5  15   40.70    5.30
   5  -5 -15   40.57    4.76
  -5   6  15   32.41    4.79
   5  -6 -15   19.76    3.86
  -5   7  15   93.86    7.83
   5  -7 -15   99.81    8.28
  -5   8  15    5.44    3.52
   5  -8 -15    8.21    3.58
  -5   9  15    4.24    2.93
   5  -9 -15    4.05    3.35
  -5  10  15    5.75    4.26
   5 -10 -15   -2.20    3.31
  -5  11  15   76.84    7.06
   5 -11 -15   86.46    7.46
  -5  12  15    2.24    2.91
   5 -12 -15   -3.71    3.24
  -5  13  15   77.24    6.72
   5 -13 -15   78.02    6.90
  -5  14  15    1.83    3.36
   5  17 -14    7.13    3.38
   5  16 -14   43.13    4.86
   5  15 -14   31.95    4.28
   5  14 -14   22.58    3.98
   5  13 -14   22.75    4.01
   5  12 -14   14.16    3.71
   5  11 -14   22.11    4.02
   5  10 -14   10.46    3.54
   5   9 -14   68.39    6.41
   5   8 -14   78.12    7.04
   5   7 -14  541.80   38.35
  -5  -6  14  148.20   11.62
   5   6 -14  138.20   10.91
  -5  -5  14  188.50   14.24
   5   5 -14  192.20   14.46
  -5  -4  14   89.19    7.82
   5   4 -14   65.04    6.13
  -5  -3  14   64.98    6.38
   5   3 -14   78.11    6.95
  -5  -2  14   77.65    7.11
   5   2 -14   83.51    7.19
  -5  -1  14  200.80   14.99
   5   1 -14  207.10   15.45
  -5   0  14  213.30   15.79
   5   0 -14  190.30   14.33
  -5   1  14  202.80   15.03
   5  -1 -14  203.90   15.21
  -5   2  14   82.00    7.12
   5  -2 -14   90.16    7.64
  -5   3  14   77.45    6.94
   5  -3 -14   84.55    7.17
  -5   4  14   76.96    7.10
   5  -4 -14   65.99    6.05
  -5   5  14  209.80   15.77
   5  -5 -14  189.40   14.25
  -5   6  14  157.20   12.21
   5  -6 -14  158.70   12.06
  -5   7  14  539.90   38.20
   5  -7 -14  543.50   38.32
  -5   8  14   83.56    7.36
   5  -8 -14   38.08    4.57
  -5   9  14   68.02    6.50
   5  -9 -14   64.51    5.99
  -5  10  14    3.45    3.79
   5 -10 -14    4.46    3.31
  -5  11  14   19.51    4.02
   5 -11 -14   28.89    4.27
  -5  12  14   16.62    3.71
   5 -12 -14    7.76    3.44
  -5  13  14   30.87    4.37
   5 -13 -14   34.03    4.71
  -5  14  14   21.15    3.83
   5 -14 -14   20.01    3.70
  -5  15  14   34.04    4.45
   5 -15 -14   32.15    4.23
  -5  16  14   50.04    5.24
   5 -16 -14   45.13    4.83
  -5  17  14    8.50    2.96
   5 -17 -14   16.66    3.57
   5  20 -13   46.86    5.05
   5  19 -13   13.72    3.75
   5  18 -13   56.15    5.76
   5  17 -13   38.11    4.89
   5  16 -13   16.74    3.93
   5  15 -13   -2.16    3.48
   5  14 -13   59.74    5.81
   5  13 -13  259.20   19.00
   5  12 -13    3.93    3.58
   5  11 -13  235.80   17.39
   5  10 -13  145.50   11.45
   5   9 -13  194.40   14.63
   5   8 -13   69.50    6.42
  -5  -7  13 1056.00   73.68
   5   7 -13 1095.00   76.52
  -5  -6  13  359.60   25.81
   5   6 -13  391.50   28.09
  -5  -5  13  100.30    8.51
   5   5 -13  107.00    8.89
  -5  -4  13  301.40   21.95
   5   4 -13  321.50   23.30
  -5  -3  13  118.10    9.82
   5   3 -13  120.90    9.79
  -5  -2  13   -5.20    3.63
   5   2 -13   10.45    3.60
  -5  -1  13  181.40   13.96
   5   1 -13  175.90   13.47
  -5   0  13   -2.83    3.78
   5   0 -13   -2.64    3.35
  -5   1  13  171.70   13.30
   5  -1 -13  164.40   12.62
  -5   2  13    5.99    3.83
   5  -2 -13    6.18    2.90
  -5   3  13  119.20    9.81
   5  -3 -13  111.90    9.09
  -5   4  13  322.80   23.35
   5  -4 -13  316.30   22.92
  -5   5  13  105.30    8.76
   5  -5 -13  106.90    8.90
  -5   6  13  429.70   30.82
   5  -6 -13  350.90   25.27
  -5   7  13 1134.00   79.08
   5  -7 -13 1156.00   80.67
  -5   8  13   69.01    6.49
   5  -8 -13   59.67    5.68
  -5   9  13  195.30   14.80
   5  -9 -13  177.50   13.46
  -5  10  13  149.80   11.76
   5 -10 -13  147.90   11.45
  -5  11  13  260.80   19.07
   5 -11 -13  292.70   21.25
  -5  12  13    1.99    3.38
   5 -12 -13    3.04    3.14
  -5  13  13  264.10   19.39
   5 -13 -13  265.50   19.31
  -5  14  13   63.68    6.41
   5 -14 -13   61.16    5.76
  -5  15  13    1.73    3.21
   5 -15 -13    3.38    2.35
  -5  16  13   12.61    3.31
   5 -16 -13   12.57    2.71
  -5  17  13   34.93    4.69
   5 -17 -13   18.35    3.03
  -5  18  13   51.32    5.35
   5 -18 -13   60.27    5.37
  -5  19  13    3.88    3.70
   5 -19 -13    6.39    3.07
  -5  20  13   48.80    4.95
   5 -20 -13   57.48    5.54
   5  22 -12   34.76    4.47
   5  21 -12   94.91    8.11
   5  20 -12   82.40    7.34
   5  19 -12   -0.61    3.45
   5  18 -12    7.85    3.48
   5  17 -12    3.29    3.35
   5  16 -12    9.39    3.74
   5  15 -12  356.30   25.67
   5  14 -12    3.60    3.38
   5  13 -12    4.71    3.40
   5  12 -12  302.50   21.98
   5  11 -12    3.95    3.40
   5  10 -12  112.90    9.31
   5   9 -12    1.64    3.34
   5   8 -12  461.90   32.88
  -5  -7  12   75.79    6.87
   5   7 -12   89.35    7.76
  -5  -6  12    2.41    3.46
   5   6 -12    3.88    3.20
  -5  -5  12   56.27    5.78
   5   5 -12   69.66    6.46
  -5  -4  12    4.41    3.30
   5   4 -12    0.28    3.11
  -5  -3  12   22.76    4.09
   5   3 -12   20.22    3.78
  -5  -2  12    7.23    3.69
   5   2 -12   18.10    3.76
  -5  -1  12  129.40   10.47
   5   1 -12  143.70   11.27
  -5   0  12  547.60   38.93
   5   0 -12  507.20   36.05
  -5   1  12  136.10   11.00
   5  -1 -12  124.30    9.88
  -5   2  12   16.97    4.02
   5  -2 -12   17.37    3.83
  -5   3  12   13.54    4.08
   5  -3 -12   14.66    3.73
  -5   4  12   -0.11    3.71
   5  -4 -12   -0.97    3.31
  -5   5  12   66.21    6.64
   5  -5 -12   72.52    6.78
  -5   6  12   -3.81    3.71
   5  -6 -12    1.52    3.23
  -5   7  12   79.31    7.28
   5  -7 -12   99.14    8.24
  -5   8  12  531.70   37.65
   5  -8 -12  490.00   34.86
  -5   9  12    8.56    3.58
   5  -9 -12    0.04    3.24
  -5  10  12  116.60    9.54
   5 -10 -12  108.60    8.82
  -5  11  12   -0.34    3.78
   5 -11 -12    7.33    3.42
  -5  12  12  326.50   23.62
   5 -12 -12  332.70   24.04
  -5  13  12    8.04    4.22
   5 -13 -12    3.37    3.40
  -5  14  12    8.05    3.90
   5 -14 -12    4.38    3.16
  -5  15  12  353.70   25.42
   5 -15 -12  343.20   24.62
  -5  16  12   11.83    4.12
   5 -16 -12    8.26    2.69
  -5  17  12   -1.08    3.45
   5 -17 -12    1.08    2.97
  -5  18  12    0.05    3.31
   5 -18 -12    7.82    3.21
  -5  19  12    2.39    3.70
   5 -19 -12    2.58    3.04
  -5  20  12   66.59    6.23
   5 -20 -12   85.05    6.97
  -5  21  12   89.23    7.38
   5 -21 -12   99.86    8.11
  -5  22  12   26.41    3.98
   5 -22 -12   15.07    3.36
   5  24 -11   12.02    5.15
   5  23 -11   49.06    6.07
   5  22 -11   82.17    7.87
   5  21 -11    4.24    4.67
   5  20 -11   22.71    4.50
   5  19 -11   54.49    6.03
   5  18 -11  135.10   10.74
   5  17 -11  310.10   22.48
   5  16 -11   15.32    3.82
   5  15 -11  358.70   25.77
   5  14 -11  130.10   10.42
   5  13 -11  134.10   10.63
   5  12 -11    2.20    3.32
   5  11 -11  363.80   26.16
   5  10 -11   65.02    6.18
   5   9 -11  549.80   38.95
   5   8 -11   13.60    3.42
  -5  -7  11   77.43    7.17
   5   7 -11   77.99    6.96
  -5  -6  11  316.80   22.96
   5   6 -11  306.00   22.22
  -5  -5  11  256.90   18.83
   5   5 -11  252.60   18.67
  -5  -4  11   15.55    4.32
   5   4 -11   14.18    3.68
  -5  -3  11   34.48    5.12
   5   3 -11   40.30    5.02
  -5  -2  11    0.72    3.42
   5   2 -11    2.20    3.41
  -5  -1  11  160.40   12.41
   5   1 -11  165.10   12.75
  -5   0  11    3.05    3.61
   5   0 -11   -4.06    3.21
  -5   1  11  177.00   13.69
   5  -1 -11  184.60   14.08
  -5   2  11    7.04    3.76
   5  -2 -11    9.04    3.19
  -5   3  11   39.91    5.35
   5  -3 -11   43.53    5.08
  -5   4  11   14.59    4.18
   5  -4 -11    6.93    3.14
  -5   5  11  280.60   20.68
   5  -5 -11  253.40   18.71
  -5   6  11  329.90   24.06
   5  -6 -11  329.30   23.79
  -5   7  11   80.44    7.55
   5  -7 -11   68.32    6.48
  -5   8  11   21.92    4.35
   5  -8 -11   28.00    3.92
  -5   9  11  647.80   45.64
   5  -9 -11  572.90   40.54
  -5  10  11   65.81    6.29
   5 -10 -11   64.83    6.05
  -5  11  11  421.10   30.10
   5 -11 -11  363.40   26.17
  -5  12  11    0.24    3.26
   5 -12 -11   -1.63    3.77
  -5  13  11  140.80   11.21
   5 -13 -11  144.70   11.27
  -5  14  11  109.60    9.19
   5 -14 -11  132.40   10.20
  -5  15  11  384.80   27.63
   5 -15 -11  388.50   27.79
  -5  16  11   18.23    3.84
   5 -16 -11   18.04    3.77
  -5  17  11  329.30   23.60
   5 -17 -11  310.80   22.47
  -5  18  11  123.80    9.97
   5 -18 -11  124.80   10.02
  -5  19  11   41.51    5.22
   5 -19 -11   49.95    5.38
  -5  20  11   15.43    3.80
   5 -20 -11   27.40    4.20
  -5  21  11    8.70    3.50
   5 -21 -11   19.53    3.93
  -5  22  11  108.50    8.73
   5 -22 -11   92.27    7.76
  -5  23  11   42.97    4.71
   5 -23 -11   47.53    4.97
  -5  24  11   16.28    3.48
   5 -24 -11   11.99    3.21
   5  25 -10   27.10    5.41
   5  24 -10   26.25    5.12
   5  23 -10   44.13    5.94
   5  22 -10   -0.71    4.63
   5  21 -10   91.75    8.46
   5  20 -10  159.60   12.62
   5  19 -10   55.11    6.40
   5  18 -10  322.30   23.47
   5  17 -10    3.67    4.38
   5  16 -10  102.10    9.35
   5  15 -10   72.64    6.82
   5  14 -10  317.90   23.09
   5  13 -10   49.31    5.41
   5  12 -10   25.13    4.17
   5  11 -10  440.30   31.42
   5  10 -10  894.30   62.68
   5   9 -10    2.16    3.21
   5   8 -10  406.70   29.16
  -5  -7  10  124.10   10.06
   5   7 -10  102.10    8.58
  -5  -6  10 1522.00  106.00
   5   6 -10 1616.00  112.60
  -5  -5  10  932.10   65.22
   5   5 -10  952.70   66.75
  -5  -4  10  312.10   22.66
   5   4 -10  296.80   21.63
  -5  -3  10  411.70   29.45
   5   3 -10  416.40   29.76
  -5  -2  10   41.46    5.04
   5   2 -10   46.19    5.28
  -5  -1  10   22.18    4.26
   5   1 -10   15.86    3.87
  -5   0  10  111.20    9.38
   5   0 -10  113.60    9.40
  -5   1  10   25.97    4.73
   5  -1 -10   27.14    4.22
  -5   2  10   46.91    6.00
   5  -2 -10   44.07    4.98
  -5   3  10  385.00   27.71
   5  -3 -10  282.60   20.68
  -5   4  10  285.20   20.87
   5  -4 -10  310.00   22.60
  -5   5  10  969.90   68.07
   5  -5 -10  860.20   60.38
  -5   6  10 1521.00  106.10
   5  -6 -10 1531.00  106.60
  -5   7  10  132.40   10.82
   5  -7 -10  104.70    8.75
  -5   8  10  459.60   32.90
   5  -8 -10  423.80   30.32
  -5   9  10    2.00    3.65
   5  -9 -10    0.55    3.03
  -5  10  10  897.20   62.93
   5 -10 -10  886.50   62.15
  -5  11  10  457.70   32.61
   5 -11 -10  440.10   31.40
  -5  12  10   30.46    4.48
   5 -12 -10   37.92    4.53
  -5  13  10   38.75    4.65
   5 -13 -10   32.39    4.63
  -5  14  10  317.20   22.97
   5 -14 -10  306.30   22.29
  -5  15  10   54.57    5.88
   5 -15 -10   53.25    5.12
  -5  16  10   75.68    7.21
   5 -16 -10   72.61    6.62
  -5  17  10    0.65    3.72
   5 -17 -10    6.79    3.38
  -5  18  10  325.40   23.57
   5 -18 -10  309.40   22.41
  -5  19  10   67.74    6.28
   5 -19 -10   63.37    6.17
  -5  20  10  153.20   11.89
   5 -20 -10  135.90   10.64
  -5  21  10  126.60   10.30
   5 -21 -10   85.23    7.33
  -5  22  10    1.25    3.27
   5 -22 -10   -1.39    3.04
  -5  23  10   36.38    4.78
   5 -23 -10   40.09    4.49
  -5  24  10   30.77    4.31
   5 -24 -10   47.41    4.89
  -5  25  10   22.10    4.14
   5 -25 -10   27.78    4.11
   5  26  -9    8.82    3.66
   5  26  -9   -2.44    5.23
   5  25  -9   18.73    5.28
   5  24  -9   44.44    6.23
   5  23  -9    2.41    4.82
   5  22  -9  161.50   12.78
   5  21  -9  101.50    9.04
   5  20  -9  778.30   54.76
   5  19  -9  249.70   18.60
   5  18  -9   35.77    5.45
   5  17  -9  169.50   13.27
   5  16  -9   66.06    6.78
   5  15  -9   24.55    4.82
   5  14  -9   13.87    4.28
   5  13  -9   -0.74    3.39
   5  12  -9   51.53    5.37
   5  11  -9   42.61    4.94
   5  10  -9    4.35    3.30
   5   9  -9   17.32    3.70
   5   8  -9  563.20   39.88
  -5  -7   9   62.78    6.69
   5   7  -9   69.99    6.54
  -5  -6   9 1385.00   96.59
   5   6  -9 1329.00   92.65
  -5  -5   9   23.70    4.45
   5   5  -9   15.33    3.81
  -5  -4   9 1647.00  114.50
   5   4  -9 1783.00  124.10
  -5  -3   9  710.70   49.95
   5   3  -9  703.80   49.62
  -5  -2   9  488.80   34.69
   5   2  -9  511.20   36.38
  -5  -1   9  301.80   21.89
   5   1  -9  295.60   21.58
  -5   0   9    2.72    3.66
   5   0  -9   -0.20    3.60
  -5   1   9  347.70   25.12
   5  -1  -9  337.40   24.45
  -5   2   9  510.00   36.17
   5  -2  -9  514.00   36.54
  -5   3   9  732.50   51.56
   5  -3  -9  722.90   50.92
  -5   4   9 1333.00   93.06
   5  -4  -9 1943.00  135.10
  -5   5   9   26.80    4.61
   5  -5  -9   14.67    4.10
  -5   6   9 1359.00   94.86
   5  -6  -9 1359.00   94.77
  -5   7   9   65.90    6.83
   5  -7  -9   54.71    5.67
  -5   8   9  552.00   39.27
   5  -8  -9  551.70   39.15
  -5   9   9   24.84    4.54
   5  -9  -9   38.68    4.85
  -5  10   9   -1.29    3.82
   5 -10  -9    2.63    3.48
  -5  11   9   39.27    5.31
   5 -11  -9   34.86    4.38
  -5  12   9   44.75    5.27
   5 -12  -9   52.45    5.59
  -5  13   9    1.25    3.76
   5 -13  -9    2.46    3.24
  -5  14   9   34.08    4.60
   5 -14  -9   22.34    3.36
  -5  15   9   19.71    3.95
   5 -15  -9   23.46    4.24
  -5  16   9   71.22    6.78
   5 -16  -9   72.56    6.98
  -5  17   9  176.80   13.48
   5 -17  -9  174.30   13.39
  -5  18   9   46.22    5.60
   5 -18  -9   47.99    5.30
  -5  19   9  192.20   14.56
   5 -19  -9  230.60   17.05
  -5  20   9  756.60   53.11
   5 -20  -9  725.70   50.99
  -5  21   9   80.74    7.02
   5 -21  -9   97.85    8.24
  -5  22   9  211.60   15.93
   5 -22  -9  190.10   14.32
  -5  23   9   -6.41    3.56
   5 -23  -9    3.75    3.33
  -5  24   9   60.40    6.09
   5 -24  -9   42.31    4.63
  -5  25   9   13.68    3.59
   5 -25  -9   15.78    3.35
  -5  26   9    2.05    3.56
   5 -26  -9   -1.43    3.29
  -5  27   9    0.41    3.29
   5  28  -8    8.81    3.82
   5  28  -8    8.39    5.76
   5  27  -8    4.10    4.88
   5  27  -8   -0.38    3.45
   5  26  -8  107.10    8.79
   5  26  -8  106.60    9.44
   5  25  -8  188.50   14.67
   5  25  -8  197.00   14.82
   5  24  -8  158.30   12.66
   5  23  -8   56.47    6.59
   5  22  -8  593.70   42.06
   5  21  -8  455.80   32.64
   5  20  -8  498.00   35.55
   5  19  -8  606.20   42.94
   5  18  -8  138.40   11.25
   5  17  -8  157.80   12.56
   5  16  -8  199.80   15.24
   5  15  -8   57.74    6.30
   5  14  -8   64.12    6.64
   5  13  -8   20.13    4.43
   5  12  -8  294.50   21.53
   5  11  -8  896.20   62.79
   5  10  -8   17.14    3.57
   5   9  -8  583.10   41.21
   5   8  -8   38.18    4.78
  -5  -7   8  223.60   16.79
   5   7  -8  183.90   13.88
  -5  -6   8  165.40   12.87
   5   6  -8  173.60   13.18
  -5  -5   8  319.40   23.16
   5   5  -8  311.30   22.54
  -5  -4   8  811.70   56.91
   5   4  -8  895.70   62.75
  -5  -3   8  363.90   26.02
   5   3  -8  380.70   27.25
  -5  -2   8 2560.00  177.50
   5   2  -8 2909.00  201.70
  -5  -1   8   85.11    7.37
   5   1  -8   86.11    7.39
  -5   0   8 1597.00  111.00
   5   0  -8 1581.00  110.00
  -5   1   8   84.93    7.30
   5  -1  -8   85.28    7.39
  -5   2   8 3047.00  211.30
   5  -2  -8 2894.00  200.70
  -5   3   8  391.70   28.04
   5  -3  -8  373.30   26.76
  -5   4   8  989.00   69.25
   5  -4  -8  825.40   57.90
  -5   5   8  359.40   25.98
   5  -5  -8  319.50   23.13
  -5   6   8  162.10   12.65
   5  -6  -8  196.50   14.84
  -5   7   8  204.90   15.49
   5  -7  -8  205.80   15.42
  -5   8   8   35.10    5.05
   5  -8  -8   40.11    5.04
  -5   9   8  549.20   39.10
   5  -9  -8  598.00   42.32
  -5  10   8   11.38    4.00
   5 -10  -8   15.39    3.46
  -5  11   8  921.20   64.69
   5 -11  -8  922.80   64.71
  -5  12   8  323.20   23.62
   5 -12  -8  346.20   25.00
  -5  13   8   18.35    4.33
   5 -13  -8   23.60    4.18
  -5  14   8   64.43    6.30
   5 -14  -8   78.71    7.02
  -5  15   8   66.41    6.39
   5 -15  -8   64.25    6.25
  -5  16   8  229.20   16.93
   5 -16  -8  208.20   15.67
  -5  17   8  157.60   12.07
   5 -17  -8  141.00   11.26
  -5  18   8  111.50    9.13
   5 -18  -8  144.70   11.58
  -5  19   8  589.80   41.74
   5 -19  -8  614.80   43.43
  -5  20   8  497.90   35.40
   5 -20  -8  500.10   35.48
  -5  21   8  453.30   32.36
   5 -21  -8  474.80   33.73
  -5  22   8  585.30   41.21
   5 -22  -8  602.50   42.42
  -5  23   8   52.57    5.67
   5 -23  -8   61.29    5.84
  -5  24   8  156.10   12.13
   5 -24  -8  158.80   12.21
  -5  25   8  178.10   13.42
   5 -25  -8  216.20   15.89
  -5  26   8  110.20    9.16
   5 -26  -8  117.10    9.15
  -5  27   8   -1.88    3.50
  -5  28   8    9.01    3.46
   5  28  -7   -4.24    5.37
   5  28  -7   -1.18    3.52
   5  27  -7   92.26    8.87
   5  27  -7   92.69    7.87
   5  26  -7   15.44    5.38
   5  26  -7    4.66    3.47
   5  25  -7  148.10   11.96
   5  25  -7  158.90   12.15
   5  24  -7   -4.46    4.35
   5  24  -7    1.61    3.47
   5  23  -7  437.00   31.37
   5  23  -7  499.50   35.41
   5  22  -7   53.72    6.21
   5  21  -7  369.70   26.67
   5  20  -7    5.75    4.19
   5  19  -7   31.97    5.06
   5  18  -7   33.95    5.20
   5  17  -7  274.00   20.25
   5  16  -7  224.70   16.95
   5  15  -7  131.90   10.85
   5  14  -7  167.50   13.15
   5  13  -7   45.05    5.55
   5  12  -7    3.61    3.63
   5  11  -7   96.61    8.32
   5  10  -7   73.51    7.15
   5   9  -7   51.42    5.28
   5   8  -7    6.79    3.14
   5   7  -7   33.93    4.25
  -5  -6   7    6.90    3.65
   5   6  -7    0.19    3.01
  -5  -5   7   86.14    7.73
   5   5  -7   86.67    7.31
  -5  -4   7  165.70   12.70
   5   4  -7  169.10   12.79
  -5  -3   7 2963.00  205.40
   5   3  -7 2940.00  203.80
  -5  -2   7    1.79    3.45
   5   2  -7    1.91    2.91
  -5  -1   7  620.30   43.72
   5   1  -7  692.00   48.61
  -5   0   7    1.84    2.98
   5   0  -7   -1.40    2.87
  -5   1   7  694.70   48.80
   5  -1  -7  644.20   45.29
  -5   2   7    4.09    3.26
   5  -2  -7   -3.77    2.88
  -5   3   7 3027.00  209.90
   5  -3  -7 2873.00  199.20
  -5   4   7  168.10   12.75
   5  -4  -7  165.30   12.54
  -5   5   7   93.15    7.86
   5  -5  -7   69.59    6.47
  -5   6   7    6.75    3.45
   5  -6  -7    2.93    3.06
  -5   7   7   38.65    4.88
   5  -7  -7   36.18    4.33
  -5   8   7    7.72    3.66
   5  -8  -7    8.00    3.19
  -5   9   7   56.56    5.95
   5  -9  -7   53.37    5.38
  -5  10   7   63.26    6.35
   5 -10  -7   35.31    4.77
  -5  11   7  102.20    8.74
   5 -11  -7   95.47    8.24
  -5  12   7   -2.08    3.69
   5 -12  -7    5.54    3.61
  -5  13   7   37.11    4.99
   5 -13  -7   43.35    5.04
  -5  14   7  139.50   11.43
   5 -14  -7  150.90   11.92
  -5  15   7  102.90    8.86
   5 -15  -7  122.40    9.98
  -5  16   7  187.50   14.24
   5 -16  -7  143.00   11.32
  -5  17   7  253.80   18.67
   5 -17  -7  255.10   18.82
  -5  18   7   23.01    3.73
   5 -18  -7   29.69    4.38
  -5  19   7    2.91    3.62
   5 -19  -7   14.22    4.00
  -5  20   7   10.21    3.85
   5 -20  -7    9.58    3.73
  -5  21   7  398.50   28.68
   5 -21  -7  376.90   27.03
  -5  22   7   51.87    5.82
   5 -22  -7   49.55    5.16
  -5  23   7  456.00   32.39
   5 -23  -7  454.50   32.24
  -5  24   7    3.12    3.46
   5 -24  -7   -0.56    3.28
  -5  25   7  177.60   13.49
   5 -25  -7  175.10   13.10
  -5  26   7   -0.14    3.20
  -5  27   7  116.80    9.46
  -5  28   7   -3.05    3.60
   5  29  -6  101.10    8.37
   5  29  -6   87.88    8.61
   5  28  -6   25.33    6.09
   5  28  -6   30.01    4.52
   5  27  -6  176.50   14.02
   5  27  -6  163.00   12.56
   5  26  -6  321.10   23.54
   5  26  -6  308.70   22.35
   5  25  -6    9.32    3.52
   5  25  -6   12.08    5.05
   5  24  -6  249.40   18.26
   5  24  -6  258.60   19.35
   5  23  -6  100.90    8.49
   5  23  -6   91.52    8.41
   5  22  -6  144.10   11.79
   5  22  -6  130.00   10.32
   5  21  -6   57.63    5.91
   5  21  -6   53.57    6.29
   5  20  -6    9.12    4.81
   5  19  -6   85.42    7.82
   5  18  -6   -1.06    3.90
   5  17  -6   45.19    5.50
   5  16  -6  160.40   12.49
   5  15  -6    1.26    3.71
   5  14  -6   46.07    5.49
   5  13  -6   35.87    4.84
   5  12  -6   -1.86    3.36
   5  11  -6  245.50   18.04
   5  10  -6   28.47    4.09
   5   9  -6 2459.00  170.50
   5   8  -6   63.16    5.82
   5   7  -6  991.10   69.13
   5   6  -6    8.86    2.98
  -5  -5   6  179.30   13.34
   5   5  -6  170.90   12.70
  -5  -4   6  222.30   16.19
   5   4  -6  224.00   16.34
  -5  -3   6  134.00   10.28
   5   3  -6  135.00   10.34
  -5  -2   6   56.40    5.41
   5   2  -6   51.17    4.89
  -5  -1   6   26.57    3.82
   5   1  -6   37.85    4.14
  -5   0   6  332.80   23.72
   5   0  -6  344.90   24.62
  -5   1   6   35.69    3.97
   5  -1  -6   25.79    3.57
  -5   2   6   53.96    5.08
   5  -2  -6   51.51    5.11
  -5   3   6  129.40   10.00
   5  -3  -6  135.70   10.42
  -5   4   6  217.60   16.01
   5  -4  -6  243.00   17.67
  -5   5   6  178.80   13.43
   5  -5  -6  169.10   12.65
  -5   6   6    8.87    3.33
   5  -6  -6    8.07    3.10
  -5   7   6  980.90   68.57
   5  -7  -6  965.30   67.42
  -5   8   6   51.53    5.39
   5  -8  -6   59.94    5.80
  -5   9   6 2885.00  200.10
   5  -9  -6 2461.00  170.80
  -5  10   6   14.68    4.13
   5 -10  -6   22.07    4.08
  -5  11   6  233.90   17.38
   5 -11  -6  252.70   18.57
  -5  12   6   -3.17    3.39
   5 -12  -6    2.38    3.54
  -5  13   6   28.66    4.26
   5 -13  -6   31.39    4.69
  -5  14   6   44.18    5.48
   5 -14  -6   29.68    4.29
  -5  15   6    9.74    3.94
   5 -15  -6    2.10    3.29
  -5  16   6  155.60   12.19
   5 -16  -6  169.90   13.07
  -5  17   6   48.55    5.43
   5 -17  -6   41.84    5.07
  -5  18   6    6.69    3.76
   5 -18  -6    9.18    3.65
  -5  19   6   76.95    6.87
   5 -19  -6   75.71    7.03
  -5  20   6    8.39    3.26
   5 -20  -6    1.29    3.49
  -5  21   6   45.58    5.26
   5 -21  -6   43.30    4.85
  -5  22   6  139.50   11.35
   5 -22  -6  147.00   11.50
  -5  23   6  120.00    9.99
   5 -23  -6  115.20    9.16
  -5  24   6  280.60   20.45
  -5  25   6    9.83    4.05
  -5  26   6  316.50   22.89
  -5  27   6  163.00   12.21
  -5  28   6   29.08    4.38
  -5  29   6   83.38    7.45
   5  30  -5   59.56    7.45
   5  30  -5   46.06    5.57
   5  29  -5   75.54    6.86
   5  29  -5   72.44    7.86
   5  28  -5  246.20   18.55
   5  28  -5  211.70   15.70
   5  27  -5   73.92    7.68
   5  27  -5   80.31    7.22
   5  26  -5    0.83    4.70
   5  26  -5   -5.18    3.60
   5  25  -5  288.60   21.25
   5  25  -5  265.10   19.32
   5  24  -5    6.30    4.56
   5  24  -5   -3.43    3.43
   5  23  -5    6.75    4.64
   5  23  -5    8.28    3.57
   5  22  -5    1.15    3.36
   5  22  -5    2.18    4.61
   5  21  -5   80.06    7.32
   5  21  -5   97.21    8.68
   5  20  -5  397.30   28.63
   5  20  -5  433.20   30.97
   5  19  -5  113.40    9.69
   5  19  -5  111.60    9.28
   5  18  -5  150.70   11.95
   5  17  -5   -6.85    3.80
   5  16  -5  213.00   16.03
   5  15  -5  463.30   33.06
   5  14  -5    4.48    4.03
   5  13  -5 1650.00  114.70
   5  12  -5    0.05    3.25
   5  11  -5  250.80   18.29
   5  10  -5   40.23    4.56
   5   9  -5 1381.00   96.01
   5   8  -5 1355.00   94.23
   5   7  -5  407.60   28.84
   5   6  -5  235.30   17.00
  -5  -5   5  997.10   69.51
   5   5  -5  982.70   68.43
  -5  -4   5 1641.00  113.90
   5   4  -5 1598.00  110.90
  -5  -3   5  349.60   24.83
   5   3  -5  355.90   25.20
  -5  -2   5  149.90   11.25
   5   2  -5  133.00   10.01
  -5  -1   5 5728.00  396.30
   5   1  -5 5135.00  355.30
  -5   0   5   -1.81    2.51
   5   0  -5   -1.61    2.29
  -5   1   5 5329.00  368.70
   5  -1  -5 5219.00  361.10
  -5   2   5  152.40   11.52
   5  -2  -5  135.20   10.25
  -5   3   5  320.80   23.03
   5  -3  -5  323.30   23.10
  -5   4   5 1607.00  111.70
   5  -4  -5 1446.00  100.50
  -5   5   5  980.90   68.42
   5  -5  -5  967.80   67.52
  -5   6   5  247.50   17.96
   5  -6  -5  211.90   15.58
  -5   7   5  424.30   30.20
   5  -7  -5  417.00   29.59
  -5   8   5 1350.00   94.04
   5  -8  -5 1360.00   94.66
  -5   9   5 1351.00   94.11
   5  -9  -5 1359.00   94.61
  -5  10   5   42.54    4.78
   5 -10  -5   38.35    4.33
  -5  11   5  266.40   19.59
   5 -11  -5  246.30   18.15
  -5  12   5   -1.26    3.51
   5 -12  -5    2.87    3.50
  -5  13   5 1933.00  134.40
   5 -13  -5 2026.00  140.80
  -5  14   5    1.45    3.75
   5 -14  -5    3.56    3.49
  -5  15   5  454.10   32.52
   5 -15  -5  472.00   33.68
  -5  16   5  209.50   15.81
   5 -16  -5  202.90   15.40
  -5  17   5    0.38    3.98
   5 -17  -5   -3.54    3.61
  -5  18   5  153.70   12.04
   5 -18  -5  177.80   13.49
  -5  19   5  139.00   10.91
   5 -19  -5  118.20    9.65
  -5  20   5  543.00   38.33
   5 -20  -5  442.20   31.57
  -5  21   5   68.14    6.48
  -5  22   5   -3.08    3.56
  -5  23   5    9.71    3.79
  -5  24   5    3.56    3.21
  -5  25   5  283.60   20.48
  -5  26   5   -1.66    3.73
  -5  27   5   91.47    7.84
  -5  28   5  272.70   19.77
  -5  29   5   84.30    7.22
  -5  30   5   40.85    4.15
   5  30  -4   -0.95    3.61
   5  29  -4    8.15    3.59
   5  28  -4   24.97    4.37
   5  27  -4   -4.00    3.45
   5  26  -4   44.52    4.97
   5  25  -4    1.92    3.19
   5  24  -4   -2.32    3.29
   5  23  -4   34.68    4.60
   5  22  -4   50.89    5.52
   5  21  -4  209.80   15.70
   5  20  -4   85.82    7.50
   5  19  -4  720.80   50.69
   5  18  -4   37.15    4.71
   5  17  -4  150.10   11.61
   5  16  -4   23.06    4.53
   5  16  -4   23.32    3.71
   5  15  -4  835.90   58.61
   5  15  -4  804.40   56.39
   5  14  -4 1454.00  101.20
   5  13  -4  456.30   32.29
   5  12  -4  413.10   29.34
   5  11  -4  154.00   11.62
   5  10  -4 1050.00   73.17
   5   9  -4  645.50   45.19
   5   8  -4  126.60    9.58
   5   7  -4    3.09    2.74
   5   6  -4  503.00   35.25
   5   5  -4 3214.00  222.50
  -5  -4   4   42.58    4.05
   5   4  -4   44.27    4.01
  -5  -3   4  255.60   18.21
   5   3  -4  280.60   19.93
  -5  -2   4  192.00   13.88
   5   2  -4  226.00   16.17
  -5  -1   4  122.20    9.11
   5   1  -4  133.60    9.91
  -5   0   4    6.56    2.26
   5   0  -4   17.24    2.65
  -5   1   4  125.10    9.42
   5  -1  -4  127.20    9.53
  -5   2   4  191.20   13.92
   5  -2  -4  207.80   15.06
  -5   3   4  214.70   15.64
   5  -3  -4  278.70   19.93
  -5   4   4   39.62    4.32
   5  -4  -4   51.72    4.87
  -5   5   4 3217.00  222.90
   5  -5  -4 3489.00  241.60
  -5   6   4  487.50   34.39
   5  -6  -4  408.80   29.01
  -5   7   4    7.15    2.84
   5  -7  -4    0.23    2.75
  -5   8   4   98.85    8.01
   5  -8  -4  110.90    8.85
  -5   9   4  589.20   41.58
   5  -9  -4  898.80   62.79
  -5  10   4 1038.00   72.49
   5 -10  -4 1179.00   82.17
  -5  11   4  164.70   12.47
   5 -11  -4  155.20   11.86
  -5  12   4  423.10   30.26
   5 -12  -4  400.00   28.57
  -5  13   4  426.00   30.55
   5 -13  -4  464.50   33.02
  -5  14   4 1357.00   94.61
   5 -14  -4 1487.00  103.60
  -5  15   4  793.80   55.90
   5 -15  -4  873.30   61.29
  -5  16   4   20.76    4.02
   5 -16  -4   17.39    3.82
  -5  17   4  186.80   14.41
   5 -17  -4  194.70   14.84
  -5  18   4   31.72    5.03
  -5  19   4  758.50   53.41
  -5  20   4   89.12    8.01
  -5  21   4  199.60   15.01
  -5  22   4   39.48    4.75
  -5  23   4   41.03    4.63
  -5  24   4    1.30    3.69
  -5  25   4    4.14    3.67
  -5  26   4   34.60    4.12
  -5  27   4    6.59    3.89
  -5  28   4   30.44    4.09
  -5  29   4    2.23    3.74
  -5  30   4   11.21    3.04
   5  30  -3   21.07    3.84
   5  29  -3   11.80    3.66
   5  28  -3   48.94    5.46
   5  27  -3   11.54    3.60
   5  26  -3  150.20   11.67
   5  25  -3   68.69    6.42
   5  24  -3   -0.50    3.31
   5  23  -3   26.11    4.30
   5  22  -3   -1.69    3.21
   5  21  -3   32.78    4.45
   5  20  -3    3.93    3.25
   5  19  -3   -7.17    3.16
   5  18  -3    9.32    3.47
   5  17  -3   84.14    7.37
   5  16  -3   41.14    4.60
   5  15  -3  724.20   50.77
   5  14  -3  234.50   17.08
   5  13  -3  733.30   51.28
   5  12  -3   57.39    5.18
   5  12  -3   51.63    4.70
   5  11  -3 1677.00  116.40
   5  11  -3 1680.00  116.60
   5  10  -3   14.34    2.88
   5   9  -3 1737.00  120.50
   5   8  -3  567.70   39.68
   5   7  -3   20.52    2.70
   5   6  -3 1104.00   76.62
   5   5  -3  128.20    9.30
   5   4  -3   78.28    5.89
  -5  -3   3    7.36    1.91
   5   3  -3    8.09    1.67
  -5  -2   3    2.93    1.81
   5   2  -3    1.81    1.51
  -5  -1   3 1633.00  113.20
   5   1  -3 1603.00  111.00
  -5   0   3    1.63    1.91
   5   0  -3    2.92    1.69
  -5   1   3 1662.00  115.20
   5  -1  -3 1799.00  124.60
  -5   2   3    0.97    2.19
   5  -2  -3   -2.16    2.04
  -5   3   3    6.28    2.32
   5  -3  -3    4.87    2.14
  -5   4   3   73.24    6.11
   5  -4  -3   73.24    6.04
  -5   5   3  164.30   12.22
   5  -5  -3  115.10    8.85
  -5   6   3 1462.00  101.60
   5  -6  -3 1147.00   79.85
  -5   7   3   26.66    3.67
   5  -7  -3   20.72    3.58
  -5   8   3  559.00   39.27
   5  -8  -3  561.10   39.51
  -5   9   3 2092.00  145.20
   5  -9  -3 1816.00  126.10
  -5  10   3   14.67    3.05
   5 -10  -3   12.94    3.28
  -5  11   3 1689.00  117.40
   5 -11  -3 1636.00  113.70
  -5  12   3   60.29    5.82
   5 -12  -3   61.81    5.97
  -5  13   3  791.20   55.70
   5 -13  -3  714.00   50.18
  -5  14   3  286.20   21.00
  -5  15   3  664.00   46.81
  -5  16   3   35.64    4.72
  -5  17   3   78.98    7.25
  -5  18   3   19.12    4.01
  -5  19   3    2.69    3.38
  -5  20   3    9.26    4.18
  -5  21   3   39.43    5.44
  -5  22   3    7.73    3.45
  -5  23   3   19.89    4.00
  -5  24   3    3.08    3.53
  -5  25   3   86.31    7.73
  -5  26   3  178.10   13.47
  -5  27   3   -0.37    3.88
  -5  28   3   44.80    4.74
  -5  29   3   11.79    3.89
  -5  30   3   15.07    3.78
   5  30  -2   84.66    7.30
   5  29  -2    8.54    3.77
   5  28  -2    1.58    3.60
   5  27  -2    4.28    3.64
   5  26  -2    6.86    3.62
   5  25  -2    4.86    3.39
   5  24  -2    0.67    3.24
   5  23  -2   17.65    3.75
   5  22  -2   28.03    4.19
   5  21  -2  101.40    8.43
   5  20  -2   23.71    4.23
   5  19  -2   31.21    4.51
   5  18  -2  790.70   55.42
   5  17  -2  137.70   10.64
   5  16  -2 1231.00   85.78
   5  15  -2  302.50   21.74
   5  14  -2  300.20   21.47
   5  13  -2  115.00    8.78
   5  12  -2 3815.00  264.10
   5  11  -2  156.90   11.46
   5  10  -2 1769.00  122.60
   5   9  -2   61.50    5.03
   5   9  -2   48.00    4.13
   5   8  -2 1370.00   95.00
   5   8  -2 1559.00  108.10
   5   7  -2  323.20   22.65
   5   7  -2  289.90   20.34
   5   6  -2   24.50    2.44
   5   6  -2   22.58    2.12
   5   5  -2 1024.00   71.08
   5   5  -2  938.90   65.20
   5   4  -2   -0.15    0.63
   5   4  -2    1.05    0.64
   5   2  -2    5.91    0.86
  -5  -1   2   63.51    4.75
   5   1  -2   61.71    4.53
  -5   0   2  310.60   21.72
   5   0  -2  319.00   22.30
  -5   1   2   71.27    5.46
   5  -1  -2   51.14    4.07
  -5   2   2    4.72    2.01
   5  -2  -2    9.10    1.97
  -5   3   2  106.40    8.04
   5  -3  -2  119.40    8.87
  -5   4   2    1.11    2.16
   5  -4  -2    4.56    2.31
  -5   5   2  971.10   67.59
   5  -5  -2  942.00   65.62
  -5   6   2   23.65    3.34
  -5   7   2  310.30   22.23
  -5   8   2 1254.00   87.26
  -5   9   2   42.94    4.38
  -5  10   2 1633.00  113.50
  -5  11   2  204.70   15.11
  -5  12   2 3401.00  235.60
  -5  13   2  115.40    9.38
  -5  14   2  341.30   24.67
  -5  15   2  262.70   19.31
  -5  16   2 1271.00   88.73
  -5  17   2  127.50   10.29
  -5  18   2  807.00   56.81
  -5  19   2   24.05    4.69
  -5  20   2   17.15    4.15
  -5  21   2  107.20    9.26
  -5  22   2   28.33    4.42
  -5  23   2   19.98    4.02
  -5  24   2   -1.16    3.33
  -5  25   2   -2.16    3.14
  -5  26   2   14.11    4.07
  -5  27   2    7.45    3.56
  -5  28   2    3.30    3.37
  -5  29   2   19.58    3.62
  -5  30   2   80.66    7.18
   5  30  -1  116.70    9.62
   5  29  -1    1.42    3.86
   5  28  -1    9.48    3.63
   5  27  -1   73.46    6.85
   5  26  -1  277.50   20.16
   5  25  -1    6.86    3.58
   5  24  -1   84.37    7.33
   5  23  -1   22.66    3.81
   5  22  -1    4.26    3.35
   5  21  -1   33.04    4.49
   5  20  -1   67.98    6.25
   5  19  -1  244.20   17.90
   5  18  -1   92.06    7.70
   5  17  -1  438.40   31.06
   5  16  -1  450.00   31.83
   5  15  -1  536.80   37.82
   5  14  -1  360.30   25.60
   5  13  -1 1643.00  114.10
   5  12  -1  116.80    8.82
   5  11  -1  414.20   29.12
   5  10  -1  285.60   20.18
   5   9  -1   51.55    4.21
   5   8  -1   12.66    1.76
   5   7  -1 1695.00  117.40
   5   6  -1 1681.00  117.50
   5   6  -1 1733.00  121.00
  -5   0   1   -0.98    1.01
  -5   1   1  353.00   24.65
  -5   2   1  110.80    8.10
  -5   3   1   55.93    4.63
  -5   4   1  867.20   60.34
  -5   5   1 1875.00  130.00
  -5   6   1 1583.00  109.90
  -5   7   1 1723.00  119.60
  -5   8   1    5.21    2.63
  -5   9   1   35.54    4.05
  -5  10   1  246.60   17.98
  -5  11   1  432.70   30.71
  -5  12   1  108.30    8.62
  -5  13   1 1831.00  127.20
  -5  14   1  257.20   18.93
  -5  15   1  485.50   34.41
  -5  16   1  477.00   34.01
  -5  17   1  375.50   27.07
  -5  18   1   98.98    8.78
  -5  19   1  209.30   15.88
  -5  20   1   75.18    7.14
  -5  21   1   39.16    5.41
  -5  22   1   -3.02    4.05
  -5  23   1   20.26    3.73
  -5  24   1   85.57    7.31
  -5  25   1    6.16    3.61
  -5  26   1  222.00   16.59
  -5  27   1   47.61    5.28
  -5  28   1    8.13    3.72
  -5  29   1    2.38    2.98
  -5  30   1  100.70    8.21
   5  30   0    0.19    3.68
   5  29   0   75.69    6.91
   5  28   0    6.72    3.60
   5  27   0   13.79    3.87
   5  26   0   80.00    7.03
   5  25   0   61.46    5.87
   5  24   0   89.98    7.58
   5  23   0  129.50   10.31
   5  22   0   27.33    3.98
   5  21   0   -1.79    3.28
   5  20   0  150.80   11.59
   5  19   0  805.80   56.42
   5  18   0   49.65    5.10
   5  17   0  790.90   55.38
   5  16   0    7.63    2.95
   5  15   0  573.70   40.30
   5  14   0  115.30    8.80
   5  13   0  931.30   64.89
   5  12   0   11.83    2.43
   5  11   0    3.72    2.19
   5  10   0   83.78    6.45
   5   9   0   42.30    3.64
   5   8   0  105.20    7.70
   5   7   0    6.24    1.40
   5   6   0   87.86    6.29
  -5  -1   0  227.00   15.89
  -5  -1   0  233.80   16.38
  -5   0   0 2987.00  206.80
  -5   0   0 2753.00  190.70
  -5   1   0  198.70   14.04
  -5   1   0  231.50   16.35
  -5   2   0   61.29    4.84
  -5   3   0   13.52    2.24
  -5   4   0  349.40   24.59
  -5   5   0   73.80    5.98
  -5   6   0   81.29    6.61
  -5   7   0    6.76    2.75
  -5   8   0  100.70    7.94
  -5   9   0   38.45    4.19
  -5  10   0   87.94    7.50
  -5  11   0    6.08    3.05
  -5  12   0   14.26    3.20
  -5  13   0  955.00   66.76
  -5  14   0  102.10    8.34
  -5  15   0  625.20   44.05
  -5  16   0   29.95    4.45
  -5  17   0  787.60   55.29
  -5  18   0   58.38    6.15
  -5  19   0  798.00   56.10
  -5  20   0  143.10   11.47
  -5  21   0    1.58    3.37
  -5  22   0   15.23    3.97
  -5  23   0  116.70    9.64
  -5  24   0   84.56    7.41
  -5  25   0   75.91    6.89
  -5  26   0   67.59    6.58
  -5  27   0    5.13    3.65
  -5  28   0    1.54    3.72
  -5  29   0   78.19    6.70
  -5  30   0    1.79    3.45
   5  30   1    3.77    3.81
   5  29   1  161.50   12.45
   5  28   1   35.84    4.98
   5  27   1  102.00    8.50
   5  26   1    1.48    3.34
   5  25   1  641.90   45.18
   5  24   1    1.23    3.15
   5  23   1  363.50   26.01
   5  22   1  125.50    9.97
   5  21   1  374.40   26.75
   5  20   1   28.59    4.26
   5  19   1  359.50   25.80
   5  18   1  120.20    9.50
   5  17   1   10.71    2.82
   5  16   1   13.26    3.09
   5  15   1  123.20    9.54
   5  14   1  366.90   26.04
   5  13   1   63.95    5.40
   5  12   1  309.60   22.00
   5  11   1    5.96    2.25
   5  10   1  101.50    7.75
  -5  -9  -1 1521.00  105.50
   5   9   1 1507.00  104.50
  -5  -8  -1  451.30   31.58
   5   8   1  574.10   40.06
  -5  -7  -1   77.75    5.91
   5   7   1   89.24    6.66
  -5  -6  -1   27.07    2.58
   5   6   1   39.33    3.39
   5   5   1 5085.00  352.00
  -5  -4  -1 1022.00   70.89
   5   4   1 1120.00   77.71
  -5  -3  -1 2673.00  185.10
  -5  -2  -1  238.90   16.81
  -5  -1  -1 3497.00  242.00
  -5   0  -1    0.43    1.44
  -5   1  -1 3421.00  236.70
  -5   2  -1  227.10   16.25
  -5   3  -1 2870.00  198.70
  -5   4  -1 1359.00   94.53
  -5   7  -1  101.20    7.96
  -5   8  -1  554.20   38.98
  -5   9  -1 1275.00   88.78
  -5  10  -1   61.00    5.71
  -5  11  -1    7.68    2.97
  -5  12  -1  331.90   23.85
  -5  13  -1   61.24    5.97
  -5  14  -1  287.10   20.77
  -5  15  -1  131.30   10.29
  -5  16  -1    8.85    3.67
  -5  17  -1    7.31    3.42
  -5  18  -1  131.00   10.56
  -5  19  -1  375.50   27.04
  -5  20  -1   27.89    4.95
  -5  21  -1  489.10   34.95
  -5  22  -1  111.50    9.47
  -5  23  -1  388.50   27.96
  -5  24  -1   -0.74    3.09
  -5  25  -1  623.90   43.82
  -5  26  -1   -0.66    2.57
  -5  27  -1   84.09    7.05
  -5  28  -1   51.07    5.54
  -5  29  -1  158.60   11.94
  -5  30  -1    0.13    3.29
   5  29   2   11.18    4.18
   5  28   2   93.58    8.12
   5  27   2   26.80    4.54
   5  26   2    0.68    3.44
   5  25   2    0.39    3.60
   5  24   2  465.30   33.09
   5  23   2  268.20   19.52
   5  22   2  266.10   19.37
   5  21   2   15.94    3.79
   5  20   2  145.40   11.21
   5  19   2   27.27    4.00
   5  18   2  126.00    9.90
   5  17   2  163.00   12.31
   5  16   2   40.17    4.35
   5  15   2    3.03    2.70
  -5 -14  -2  679.60   47.62
   5  14   2  702.90   49.29
  -5 -13  -2   10.86    2.69
   5  13   2   15.66    3.04
  -5 -12  -2 1156.00   80.47
   5  12   2  939.70   65.48
  -5 -11  -2    6.52    2.33
   5  11   2    4.41    2.35
  -5 -10  -2   -0.92    2.20
   5  10   2    2.50    2.15
  -5  -9  -2   15.60    2.55
   5   9   2   11.57    2.45
  -5  -8  -2  193.90   14.06
   5   8   2  195.40   14.11
  -5  -7  -2   49.51    4.22
   5   7   2   42.78    3.88
  -5  -6  -2   94.39    7.14
   5   6   2   89.03    6.87
  -5  -5  -2   20.56    2.57
   5   5   2   19.81    2.64
  -5  -4  -2 2012.00  139.40
   5   4   2 2099.00  145.40
  -5  -3  -2  280.30   19.79
   5   3   2  242.70   17.26
  -5  -2  -2  623.70   43.49
  -5  -1  -2  317.80   22.41
  -5   0  -2  643.60   44.89
  -5   1  -2  323.30   22.84
  -5   2  -2  607.90   42.53
  -5   3  -2  271.70   19.55
  -5   4  -2 2018.00  140.00
  -5   5  -2   15.10    3.38
  -5   6  -2   83.28    6.97
  -5  12  -2 1075.00   75.08
  -5  13  -2    8.25    3.35
  -5  14  -2  694.60   48.89
  -5  15  -2    0.94    3.49
  -5  16  -2   27.01    4.33
  -5  17  -2  156.90   12.24
  -5  18  -2  129.50   10.31
  -5  19  -2   31.00    4.64
  -5  20  -2  141.00   11.10
  -5  21  -2    4.29    3.89
  -5  22  -2  302.00   22.05
  -5  23  -2  205.10   15.31
  -5  24  -2  307.00   22.17
  -5  25  -2    4.34    3.39
  -5  26  -2    5.07    3.70
  -5  27  -2   37.05    4.56
  -5  28  -2   70.00    6.23
  -5  29  -2    8.16    3.31
   5  28   3   60.43    6.17
   5  27   3   19.76    4.40
   5  26   3  103.00    8.77
   5  25   3    8.54    3.58
   5  24   3    1.06    3.36
   5  23   3  205.80   15.46
   5  22   3   35.90    4.64
   5  21   3  370.70   26.57
   5  20   3   -1.06    3.04
   5  19   3   52.75    5.35
   5  18   3  364.70   26.09
  -5 -17  -3   37.23    4.28
   5  17   3   42.65    4.88
  -5 -16  -3   13.74    3.22
   5  16   3   16.33    3.55
  -5 -15  -3   80.22    6.79
   5  15   3   68.12    6.03
  -5 -14  -3    4.92    2.53
   5  14   3    4.13    2.93
  -5 -13  -3   16.06    2.94
   5  13   3   15.38    3.08
  -5 -12  -3   67.77    5.75
   5  12   3   71.08    6.14
  -5 -11  -3  173.40   12.77
   5  11   3  155.10   11.60
  -5 -10  -3  508.20   35.72
   5  10   3  569.20   39.96
  -5  -9  -3    2.97    2.31
   5   9   3    3.57    2.43
  -5  -8  -3  671.30   46.95
   5   8   3  660.20   46.19
  -5  -7  -3  399.80   28.22
   5   7   3  404.10   28.52
  -5  -6  -3  883.90   61.58
   5   6   3  971.60   67.64
  -5  -5  -3  555.00   38.87
   5   5   3  600.30   42.00
  -5  -4  -3  205.00   14.76
   5   4   3  216.90   15.61
  -5  -3  -3 1525.00  105.80
   5   3   3 1557.00  108.00
  -5  -2  -3 1331.00   92.43
   5   2   3 1603.00  111.20
  -5  -1  -3 1107.00   76.97
  -5   0  -3   -1.70    2.07
  -5   1  -3 1136.00   79.06
  -5   2  -3 1324.00   92.16
  -5   3  -3 1453.00  101.10
  -5   4  -3  195.80   14.61
  -5   5  -3  592.00   41.68
  -5   6  -3  823.30   57.61
  -5   7  -3  367.70   26.45
  -5   8  -3  626.40   44.18
  -5   9  -3   -3.07    3.52
  -5  10  -3  450.70   32.13
  -5  15  -3   71.87    6.47
  -5  16  -3   16.04    4.02
  -5  17  -3   42.39    4.97
  -5  18  -3  351.80   25.42
  -5  19  -3   52.91    5.52
  -5  20  -3    2.66    3.59
  -5  21  -3  351.50   25.22
  -5  22  -3   37.50    4.85
  -5  23  -3  214.90   16.11
  -5  24  -3   -4.71    3.04
  -5  25  -3    7.07    3.49
  -5  26  -3  112.20    9.28
  -5  27  -3   20.27    3.86
  -5  28  -3   59.20    5.62
   5  28   4    6.55    4.34
   5  27   4   30.75    4.98
   5  26   4  171.70   13.21
   5  25   4   14.36    3.96
   5  24   4   17.11    3.85
   5  23   4   29.92    4.56
   5  22   4  123.80    9.89
   5  21   4  276.20   20.08
   5  20   4  260.50   19.02
  -5 -19  -4  505.70   35.71
   5  19   4  521.50   36.83
  -5 -18  -4   38.94    4.43
   5  18   4   38.50    4.53
  -5 -17  -4  285.00   20.57
   5  17   4  285.30   20.71
  -5 -16  -4  304.50   21.89
   5  16   4  324.80   23.39
  -5 -15  -4  319.00   22.90
   5  15   4  310.90   22.37
  -5 -14  -4   86.89    7.18
   5  14   4   79.55    6.89
  -5 -13  -4  450.10   31.85
   5  13   4  300.90   21.62
  -5 -12  -4  602.20   42.33
   5  12   4  620.80   43.64
  -5 -11  -4    5.06    2.48
   5  11   4    4.07    2.45
  -5 -10  -4   80.18    6.57
   5  10   4   93.61    7.59
  -5  -9  -4  267.40   19.23
   5   9   4  245.70   17.79
  -5  -8  -4 1632.00  113.30
   5   8   4 1838.00  127.60
  -5  -7  -4  892.80   62.23
   5   7   4  802.90   56.08
  -5  -6  -4 1488.00  103.30
   5   6   4 1485.00  103.10
  -5  -5  -4 1185.00   82.41
   5   5   4 1140.00   79.37
  -5  -4  -4  326.50   23.21
   5   4   4  220.40   16.00
  -5  -3  -4  120.40    9.22
   5   3   4  102.40    8.08
  -5  -2  -4  867.90   60.57
   5   2   4  875.90   61.09
  -5  -1  -4    9.95    2.96
  -5   0  -4 1782.00  123.80
  -5   1  -4    7.38    3.05
  -5   2  -4  863.30   60.39
  -5   3  -4  107.60    8.58
  -5   4  -4  346.70   24.81
  -5   5  -4 1227.00   85.58
  -5   6  -4 1562.00  108.70
  -5   7  -4  834.50   58.51
  -5   8  -4 1370.00   95.40
  -5   9  -4  250.20   18.52
  -5  10  -4   76.67    7.47
  -5  11  -4    3.53    4.94
  -5  12  -4  605.20   42.93
  -5  13  -4  300.90   22.08
  -5  14  -4   82.33    8.14
  -5  15  -4  271.80   20.26
  -5  16  -4  324.50   23.62
  -5  18  -4   51.73    5.48
  -5  19  -4  417.20   29.77
  -5  20  -4  353.40   25.23
  -5  21  -4  251.60   18.39
  -5  22  -4  127.40   10.04
  -5  23  -4   31.75    4.69
  -5  24  -4   25.04    3.82
  -5  25  -4   12.58    3.77
  -5  26  -4   99.57    8.23
  -5  27  -4   24.28    3.79
  -5  28  -4   15.83    3.92
   5  27   5    9.97    4.48
   5  26   5    4.79    3.88
   5  25   5   17.42    3.99
   5  24   5   14.04    3.93
   5  23   5  216.50   16.11
   5  22   5   95.11    8.06
  -5 -21  -5   17.91    3.36
   5  21   5   25.58    4.11
  -5 -20  -5  211.80   15.51
   5  20   5  223.40   16.56
  -5 -19  -5   37.13    4.34
   5  19   5   31.10    4.28
  -5 -18  -5   97.75    7.93
   5  18   5   75.62    6.84
  -5 -17  -5   41.90    4.61
   5  17   5   34.61    4.41
  -5 -16  -5  732.70   51.38
   5  16   5  726.10   51.01
  -5 -15  -5  162.50   12.23
   5  15   5  158.10   12.13
  -5 -14  -5   94.20    7.70
   5  14   5   91.43    7.84
  -5 -13  -5    8.16    2.91
   5  13   5    2.55    2.58
  -5 -12  -5   53.32    5.03
   5  12   5   61.51    5.76
  -5 -11  -5  150.70   11.37
   5  11   5  154.40   11.63
  -5 -10  -5   -2.44    2.43
   5  10   5   -3.57    2.77
  -5  -9  -5  210.50   15.41
   5   9   5  233.00   17.01
  -5  -8  -5   -0.48    2.40
   5   8   5   -0.55    2.89
  -5  -7  -5  417.50   29.55
   5   7   5  363.70   25.89
  -5  -6  -5   -0.30    2.33
   5   6   5    4.97    2.73
  -5  -5  -5   65.36    5.78
   5   5   5   75.14    6.39
  -5  -4  -5  755.90   52.92
   5   4   5  949.20   66.30
  -5  -3  -5   33.47    4.22
   5   3   5   45.05    4.99
  -5  -2  -5  184.90   13.82
   5   2   5  176.70   13.31
  -5  -1  -5  465.10   32.96
   5   1   5  605.50   42.59
  -5   0  -5    0.33    3.09
  -5   1  -5  445.60   31.64
  -5   2  -5  183.10   13.70
  -5   3  -5   28.92    4.13
  -5   4  -5  749.80   52.63
  -5   5  -5   74.86    7.13
  -5   6  -5    6.48    3.90
  -5   7  -5  412.70   29.53
  -5   8  -5    3.52    3.95
  -5   9  -5  258.40   19.22
  -5  10  -5   -0.88    5.15
  -5  11  -5  100.20    8.98
  -5  12  -5   57.07    6.42
  -5  13  -5    7.99    5.13
  -5  14  -5  100.10    9.05
  -5  15  -5  147.40   12.01
  -5  16  -5  806.30   56.73
  -5  17  -5   30.06    6.03
  -5  18  -5   90.04    8.57
  -5  19  -5   30.17    5.48
  -5  20  -5  212.30   15.57
  -5  20  -5  207.10   15.87
  -5  21  -5   29.56    4.22
  -5  21  -5   23.27    5.48
  -5  22  -5   97.24    8.14
  -5  22  -5   79.60    7.89
  -5  23  -5  207.20   15.40
  -5  23  -5  228.00   17.21
  -5  24  -5   15.06    3.63
  -5  24  -5   21.14    5.22
  -5  25  -5    7.56    3.51
  -5  25  -5    7.72    4.93
  -5  26  -5   -2.44    4.78
  -5  26  -5    0.07    3.16
  -5  27  -5    2.67    3.69
  -5  27  -5    0.37    5.09
   5  25   6   10.47    4.35
   5  24   6   12.62    3.92
  -5 -23  -6   56.36    5.54
   5  23   6   50.29    5.68
  -5 -22  -6   17.34    3.50
   5  22   6   20.92    4.31
  -5 -21  -6    9.12    3.33
   5  21   6   12.59    3.92
  -5 -20  -6   10.19    3.20
   5  20   6   10.09    3.99
  -5 -19  -6    3.08    2.87
   5  19   6    7.39    3.84
  -5 -18  -6   97.12    7.98
   5  18   6  107.30    8.89
  -5 -17  -6    7.49    3.00
   5  17   6    5.63    3.53
  -5 -16  -6  579.00   40.76
   5  16   6  497.30   35.23
  -5 -15  -6  223.60   16.51
   5  15   6  234.30   17.22
  -5 -14  -6  688.90   48.38
   5  14   6  614.20   43.27
  -5 -13  -6    3.73    2.70
   5  13   6   -1.33    2.85
  -5 -12  -6  297.00   21.38
   5  12   6  325.50   23.41
  -5 -11  -6    3.88    2.63
   5  11   6    4.06    2.96
  -5 -10  -6  803.30   56.19
   5  10   6  791.70   55.48
  -5  -9  -6  121.80    9.48
   5   9   6  110.80    8.92
  -5  -8  -6   -0.21    2.65
   5   8   6    7.22    3.34
  -5  -7  -6  113.00    8.90
   5   7   6  105.40    8.63
  -5  -6  -6   74.81    6.49
   5   6   6   79.98    6.89
  -5  -5  -6   97.48    7.99
   5   5   6  109.70    8.79
  -5  -4  -6  111.20    9.02
   5   4   6   97.95    8.01
  -5  -3  -6  327.20   23.59
   5   3   6  298.00   21.57
  -5  -2  -6    5.43    3.15
   5   2   6    6.20    3.33
  -5  -1  -6   84.56    7.26
   5   1   6   74.45    6.65
  -5   0  -6  598.30   42.15
  -5   1  -6   80.90    6.92
  -5   2  -6    1.17    2.79
  -5   3  -6  319.50   23.05
  -5   4  -6  108.20    8.85
  -5   5  -6   95.15    7.98
  -5   6  -6   86.03    7.76
  -5   7  -6  104.50    9.01
  -5   8  -6    1.81    4.37
  -5   9  -6  126.30   10.62
  -5  10  -6  898.40   63.08
  -5  11  -6    0.52    4.41
  -5  12  -6  365.40   26.50
  -5  13  -6   -5.15    4.67
  -5  14  -6  682.90   48.27
  -5  15  -6  171.30   13.44
  -5  16  -6  497.60   35.51
  -5  17  -6   -3.75    4.84
  -5  18  -6  119.70   10.41
  -5  19  -6    3.95    4.51
  -5  20  -6    2.79    4.67
  -5  21  -6    5.11    3.42
  -5  21  -6    3.58    4.94
  -5  22  -6   23.71    3.85
  -5  22  -6   22.22    5.26
  -5  23  -6   55.36    5.55
  -5  23  -6   61.09    7.27
  -5  24  -6   17.70    3.31
  -5  24  -6   11.42    4.99
  -5  25  -6    0.41    3.32
  -5  25  -6    2.38    5.23
  -5 -24  -7   35.33    4.69
   5  24   7   37.24    5.44
  -5 -23  -7   46.71    5.14
   5  23   7   51.64    5.78
  -5 -22  -7   85.31    7.42
   5  22   7   62.59    6.31
  -5 -21  -7    9.15    3.29
   5  21   7    2.92    3.99
  -5 -20  -7    8.34    3.13
   5  20   7    3.56    3.77
  -5 -19  -7   80.19    6.79
   5  19   7   60.64    6.05
  -5 -18  -7   -2.50    3.25
   5  18   7   -2.26    3.31
  -5 -17  -7   95.50    7.95
   5  17   7   94.42    8.04
  -5 -16  -7  194.30   14.46
   5  16   7  117.10    9.43
  -5 -15  -7  371.60   26.53
   5  15   7  343.40   24.65
  -5 -14  -7    0.58    2.71
   5  14   7    1.77    3.36
  -5 -13  -7  904.50   63.22
   5  13   7  805.20   56.47
  -5 -12  -7   26.18    3.67
   5  12   7   23.31    4.03
  -5 -11  -7  855.50   59.88
   5  11   7  811.20   56.87
  -5 -10  -7   36.53    4.33
   5  10   7   19.26    3.95
  -5  -9  -7  569.60   40.14
   5   9   7  481.20   34.20
  -5  -8  -7   28.22    3.72
   5   8   7   27.27    4.15
  -5  -7  -7    4.87    2.98
   5   7   7    7.50    3.48
  -5  -6  -7   47.49    4.85
   5   6   7   58.53    5.75
  -5  -5  -7  115.60    9.25
   5   5   7  102.30    8.40
  -5  -4  -7   91.69    7.72
   5   4   7   81.82    7.12
  -5  -3  -7   27.69    3.92
   5   3   7   28.70    4.14
  -5  -2  -7  176.20   13.30
   5   2   7  161.50   12.39
  -5  -1  -7    9.61    3.09
   5   1   7    8.03    3.57
  -5   0  -7    5.01    3.28
  -5   1  -7    6.14    3.13
  -5   2  -7  135.90   10.63
  -5   3  -7   34.27    4.29
  -5   4  -7   84.08    7.26
  -5   5  -7  115.60    9.32
  -5   6  -7   51.14    5.37
  -5   7  -7    4.62    3.15
  -5   8  -7   19.27    4.51
  -5   9  -7  557.10   39.55
  -5  10  -7   32.91    5.42
  -5  11  -7 1013.00   70.91
  -5  12  -7   19.28    5.00
  -5  13  -7  909.10   63.74
  -5  14  -7    0.36    4.81
  -5  15  -7  361.00   26.23
  -5  16  -7  202.30   15.56
  -5  17  -7   85.66    8.29
  -5  18  -7    3.45    5.03
  -5  19  -7   65.59    7.05
  -5  20  -7    2.11    5.33
  -5  21  -7   10.11    4.91
  -5  22  -7   89.52    7.21
  -5  22  -7  119.50   10.34
  -5  23  -7   48.96    5.13
  -5  23  -7   38.29    5.85
  -5  24  -7   33.86    3.99
  -5  24  -7   26.85    5.58
  -5 -22  -8    1.99    3.38
   5  22   8   -7.27    4.05
  -5 -21  -8   57.64    5.69
   5  21   8   61.52    6.20
  -5 -20  -8   10.74    3.51
   5  20   8   25.04    4.43
  -5 -19  -8   32.71    4.45
   5  19   8   40.87    5.16
  -5 -18  -8    2.93    3.25
   5  18   8   14.43    3.89
  -5 -17  -8  205.40   15.27
   5  17   8  213.60   15.86
  -5 -16  -8   77.27    6.85
   5  16   8   68.55    6.61
  -5 -15  -8  352.30   25.16
   5  15   8  364.40   26.13
  -5 -14  -8   21.24    3.68
   5  14   8   23.48    3.95
  -5 -13  -8   21.41    3.55
   5  13   8   12.67    3.65
  -5 -12  -8   14.47    3.30
   5  12   8   19.79    4.00
  -5 -11  -8   47.97    5.00
   5  11   8   33.96    4.46
  -5 -10  -8    2.98    2.86
   5  10   8   -3.24    3.06
  -5  -9  -8  161.00   12.17
   5   9   8  124.20    9.89
  -5  -8  -8  145.40   11.15
   5   8   8  155.20   12.01
  -5  -7  -8   33.03    4.12
   5   7   8   37.39    4.62
  -5  -6  -8  141.20   10.93
   5   6   8  157.60   12.04
  -5  -5  -8  455.90   32.38
   5   5   8  446.90   31.80
  -5  -4  -8    5.32    3.03
   5   4   8    0.95    3.50
  -5  -3  -8  286.50   20.75
   5   3   8  279.00   20.36
  -5  -2  -8   57.01    5.57
   5   2   8   48.20    5.39
  -5  -1  -8   -1.98    2.83
   5   1   8    0.96    3.23
  -5   0  -8  158.10   12.14
  -5   1  -8   -3.51    3.10
  -5   2  -8   47.99    5.39
  -5   3  -8  265.50   19.48
  -5   4  -8    6.16    3.28
  -5   5  -8  471.30   33.48
  -5   6  -8  161.00   12.36
  -5   7  -8   25.33    4.11
  -5   8  -8  126.00   10.19
  -5   9  -8  170.60   13.16
  -5  10  -8    5.78    3.99
  -5  11  -8   45.62    5.98
  -5  12  -8    5.18    4.65
  -5  13  -8   13.73    5.21
  -5  14  -8   27.19    5.33
  -5  15  -8  301.90   22.10
  -5  16  -8   60.33    6.64
  -5  17  -8  235.20   17.67
  -5  18  -8   -9.56    5.38
  -5  19  -8   46.52    6.20
  -5  20  -8   25.56    5.45
  -5  21  -8   58.17    7.03
  -5  22  -8    7.79    5.29
  -5 -20  -9  192.20   14.42
   5  20   9  168.90   13.02
  -5 -19  -9   31.01    4.47
   5  19   9   35.85    4.91
  -5 -18  -9  261.00   19.07
   5  18   9  302.40   21.95
  -5 -17  -9   15.48    3.61
   5  17   9   13.20    4.04
  -5 -16  -9   90.47    7.74
   5  16   9  103.50    8.78
  -5 -15  -9   48.98    5.30
   5  15   9   45.86    5.34
  -5 -14  -9   55.85    5.48
   5  14   9   49.63    5.45
  -5 -13  -9    2.21    3.10
   5  13   9    5.97    3.96
  -5 -12  -9   67.73    6.39
   5  12   9   46.36    5.32
  -5 -11  -9   16.49    3.46
   5  11   9    5.74    3.26
  -5 -10  -9   43.74    4.63
   5  10   9   45.44    5.15
  -5  -9  -9   -0.45    2.82
   5   9   9    3.45    3.45
  -5  -8  -9  223.50   16.41
   5   8   9  215.40   15.94
  -5  -7  -9  186.60   13.98
   5   7   9  199.60   14.91
  -5  -6  -9   52.94    5.30
   5   6   9   68.59    6.45
  -5  -5  -9   23.41    3.94
   5   5   9   23.73    4.13
  -5  -4  -9  116.20    9.28
   5   4   9   79.32    7.22
  -5  -3  -9  261.30   19.05
   5   3   9  264.40   19.39
  -5  -2  -9  133.70   10.48
   5   2   9  154.30   11.93
  -5  -1  -9  610.60   43.06
  -5   0  -9    1.99    3.13
  -5   1  -9  598.40   42.29
  -5   2  -9  147.40   11.56
  -5   3  -9  256.80   18.83
  -5   4  -9  135.60   10.59
  -5   5  -9   18.24    3.82
  -5   6  -9   56.30    5.59
  -5   7  -9  173.80   13.17
  -5   8  -9  230.80   17.12
  -5   9  -9   -0.93    3.18
  -5  10  -9   31.32    4.61
  -5  11  -9    6.20    3.55
  -5  12  -9   63.24    6.17
  -5  13  -9    9.58    4.49
  -5  14  -9   51.52    6.37
  -5  15  -9   47.78    6.14
  -5  16  -9  107.20    9.47
  -5  17  -9   13.94    5.13
  -5  18  -9  270.80   20.07
  -5  19  -9   28.22    5.51
  -5  20  -9  156.60   12.63
  -5 -17 -10    8.07    3.65
   5  17  10   10.04    4.76
  -5 -16 -10   97.53    8.25
   5  16  10  119.60    9.84
  -5 -15 -10    6.96    3.60
   5  15  10   -0.09    3.73
  -5 -14 -10    4.04    3.30
   5  14  10   -0.27    3.88
  -5 -13 -10    4.70    3.44
   5  13  10    0.34    3.49
  -5 -12 -10   25.46    4.09
   5  12  10   26.44    4.60
  -5 -11 -10   37.10    4.31
   5  11  10   34.40    5.06
  -5 -10 -10    4.93    3.27
   5  10  10    0.35    3.65
  -5  -9 -10    3.27    2.90
   5   9  10    9.74    3.82
  -5  -8 -10   79.08    7.03
   5   8  10   70.80    6.64
  -5  -7 -10    9.36    3.36
   5   7  10   13.04    3.79
  -5  -6 -10  142.30   10.92
   5   6  10  141.40   11.16
  -5  -5 -10    8.29    3.53
   5   5  10   13.79    3.82
  -5  -4 -10  699.20   49.04
   5   4  10  713.00   50.09
  -5  -3 -10   62.24    5.90
   5   3  10   57.43    5.81
  -5  -2 -10 1033.00   72.08
   5   2  10  900.20   62.96
  -5  -1 -10   61.92    5.88
  -5   0 -10  264.50   19.29
  -5   1 -10   45.31    5.04
  -5   2 -10 1036.00   72.36
  -5   3 -10   52.01    5.40
  -5   4 -10  773.00   54.18
  -5   5 -10   22.08    4.04
  -5   6 -10  176.90   13.43
  -5   7 -10    9.62    3.66
  -5   8 -10   80.30    7.17
  -5   9 -10    7.01    3.57
  -5  10 -10   -0.53    3.22
  -5  11 -10   40.37    4.80
  -5  12 -10   21.98    4.04
  -5  13 -10   -4.75    3.61
  -5  14 -10    4.98    3.63
  -5  15 -10   -6.25    3.55
  -5  16 -10   92.75    8.24
  -5  17 -10   10.77    4.84
  -5 -14 -11    5.75    3.31
   5  14  11    5.01    4.28
  -5 -13 -11  105.80    8.56
   5  13  11   95.38    8.59
  -5 -12 -11   14.91    3.72
   5  12  11   10.29    3.94
  -5 -11 -11   16.54    3.64
   5  11  11   14.26    4.41
  -5 -10 -11   17.12    3.75
   5  10  11   18.00    4.08
  -5  -9 -11   16.85    3.78
   5   9  11   13.91    4.17
  -5  -8 -11   69.46    6.51
   5   8  11   68.80    6.72
  -5  -7 -11   38.75    4.74
   5   7  11   40.67    5.21
  -5  -6 -11    3.47    3.43
   5   6  11    1.64    3.65
  -5  -5 -11    7.95    3.42
   5   5  11    9.66    3.83
  -5  -4 -11    9.18    3.56
   5   4  11    0.93    4.13
  -5  -3 -11  105.20    8.64
   5   3  11  102.50    8.77
  -5  -2 -11   38.92    4.70
  -5  -1 -11   63.00    6.03
  -5   0 -11   -2.23    3.37
  -5   1 -11   65.94    6.51
  -5   2 -11   22.38    4.16
  -5   3 -11  112.10    9.03
  -5   4 -11    3.45    3.35
  -5   5 -11    8.47    3.40
  -5   6 -11   -2.97    3.56
  -5   7 -11   47.95    5.34
  -5   8 -11   71.40    6.72
  -5   9 -11   18.06    4.06
  -5  10 -11   17.24    4.03
  -5  11 -11   17.60    4.04
  -5  12 -11   16.19    3.74
  -5  13 -11   94.94    7.90
  -5  14 -11    0.55    3.48
  -5  -8 -12    0.53    3.18
   5   8  12   15.97    4.47
  -5  -7 -12   45.62    5.08
   5   7  12   50.92    5.93
  -5  -6 -12  133.80   10.43
   5   6  12  127.40   10.33
  -5  -5 -12    1.45    3.55
   5   5  12    7.26    3.85
  -5  -4 -12  127.00   10.07
   5   4  12  119.60    9.73
  -5  -3 -12   46.39    5.26
  -5  -2 -12  219.30   16.33
  -5  -1 -12   10.81    4.03
  -5   0 -12  441.00   31.37
  -5   1 -12   23.18    4.26
  -5   2 -12  207.50   15.48
  -5   3 -12   47.47    5.35
  -5   4 -12  108.40    8.87
  -5   5 -12   -2.21    3.36
  -5   6 -12  139.00   10.85
  -5   7 -12   40.32    4.93
  -5   8 -12   10.20    3.52
   6   7 -16   75.93    6.71
   6   6 -16   13.78    3.41
  -6  -5  16    4.25    3.68
   6   5 -16    5.84    3.40
  -6  -4  16    4.37    3.63
   6   4 -16    5.06    2.93
  -6  -3  16   39.90    5.21
   6   3 -16   41.40    4.91
  -6  -2  16   21.52    4.32
   6   2 -16   14.33    3.60
  -6  -1  16  118.80    9.46
   6   1 -16  122.70    9.60
  -6   0  16   91.29    7.76
   6   0 -16   81.59    7.18
  -6   1  16  112.20    9.11
   6  -1 -16  112.90    9.13
  -6   2  16   14.63    3.77
   6  -2 -16   12.10    3.31
  -6   3  16   44.05    4.93
   6  -3 -16   34.05    4.20
  -6   4  16   -4.73    3.66
   6  -4 -16    0.48    3.23
  -6   5  16    9.61    4.11
   6  -5 -16    7.11    3.45
  -6   6  16   12.46    3.80
   6  -6 -16   25.48    3.88
  -6   7  16   67.49    6.26
   6  -7 -16   59.15    5.51
  -6   8  16   10.29    3.42
   6  13 -15   57.97    5.52
   6  12 -15   20.18    3.75
   6  11 -15   29.04    4.41
   6  10 -15    6.17    3.42
   6   9 -15   53.60    5.51
   6   8 -15   22.77    3.95
   6   7 -15   27.37    4.17
  -6  -6  15    7.84    3.67
   6   6 -15    2.30    3.08
  -6  -5  15  140.40   10.99
   6   5 -15  154.90   11.92
  -6  -4  15   90.33    7.90
   6   4 -15   99.62    8.27
  -6  -3  15  233.10   17.22
   6   3 -15  266.90   19.42
  -6  -2  15   51.07    5.55
   6   2 -15   45.93    5.30
  -6  -1  15   79.65    7.13
   6   1 -15   91.29    8.05
  -6   0  15    0.50    3.45
   6   0 -15   -1.29    3.38
  -6   1  15   85.12    7.48
   6  -1 -15   92.30    7.76
  -6   2  15   55.34    5.78
   6  -2 -15   45.10    4.94
  -6   3  15  237.00   17.48
   6  -3 -15  250.60   18.28
  -6   4  15   88.21    7.76
   6  -4 -15  103.80    8.50
  -6   5  15  130.80   10.40
   6  -5 -15  102.10    8.39
  -6   6  15   -2.40    3.57
   6  -6 -15    2.59    3.33
  -6   7  15   28.40    4.32
   6  -7 -15   28.07    4.36
  -6   8  15   20.33    3.95
   6  -8 -15   24.70    4.03
  -6   9  15   50.98    5.59
   6  -9 -15   60.22    5.85
  -6  10  15    5.83    3.44
   6 -10 -15   -0.70    3.42
  -6  11  15   46.46    5.14
   6 -11 -15   41.18    4.76
  -6  12  15   18.16    3.94
   6 -12 -15   16.20    3.49
  -6  13  15   46.04    5.05
   6 -13 -15   60.14    5.47
   6  16 -14   23.20    4.10
   6  15 -14   57.84    5.71
   6  14 -14   30.82    4.09
   6  13 -14   68.73    6.39
   6  12 -14   13.87    3.77
   6  11 -14    4.65    3.26
   6  10 -14   10.86    3.73
   6   9 -14   26.02    4.04
   6   8 -14   18.41    3.93
   6   7 -14    4.06    3.36
  -6  -6  14  105.40    8.92
   6   6 -14  100.40    8.46
  -6  -5  14   91.48    8.14
   6   5 -14   70.35    6.62
  -6  -4  14  723.70   50.84
   6   4 -14  768.40   53.96
  -6  -3  14   83.68    7.48
   6   3 -14   82.03    7.31
  -6  -2  14  612.40   43.17
   6   2 -14  664.50   46.81
  -6  -1  14   44.98    5.04
   6   1 -14   37.25    4.76
  -6   0  14  810.70   56.74
   6   0 -14  862.90   60.46
  -6   1  14   40.59    4.94
   6  -1 -14   49.91    5.31
  -6   2  14  631.00   44.45
   6  -2 -14  679.80   47.84
  -6   3  14   66.96    6.42
   6  -3 -14   86.33    7.51
  -6   4  14  766.40   53.76
   6  -4 -14  669.30   47.13
  -6   5  14   75.89    7.10
   6  -5 -14   89.07    7.64
  -6   6  14  100.70    8.46
   6  -6 -14   99.94    8.33
  -6   7  14    8.39    3.56
   6  -7 -14   -0.94    3.21
  -6   8  14   18.73    4.01
   6  -8 -14   20.70    3.85
  -6   9  14   38.82    4.88
   6  -9 -14   20.10    3.89
  -6  10  14    7.26    3.89
   6 -10 -14    4.67    3.55
  -6  11  14    7.17    3.49
   6 -11 -14    4.04    3.44
  -6  12  14   12.97    3.28
   6 -12 -14   20.26    4.20
  -6  13  14   74.24    7.07
   6 -13 -14   59.36    5.77
  -6  14  14   34.69    4.87
   6 -14 -14   31.53    4.20
  -6  15  14   66.37    6.01
   6 -15 -14   69.24    6.17
  -6  16  14   16.65    3.90
   6 -16 -14   23.59    3.78
  -6  17  14   -0.78    3.19
   6  19 -13   69.55    6.45
   6  18 -13  131.90   10.39
   6  17 -13    4.33    3.49
   6  16 -13    0.12    3.39
   6  15 -13   60.22    5.90
   6  14 -13   80.38    7.13
   6  13 -13   -0.04    3.47
   6  12 -13   85.84    7.50
   6  11 -13   51.05    5.58
   6  10 -13   17.82    3.86
   6   9 -13  181.00   13.72
   6   8 -13    0.80    3.41
  -6  -7  13   74.69    6.75
   6   7 -13   71.94    6.65
  -6  -6  13    8.77    4.09
   6   6 -13    8.79    3.33
  -6  -5  13    6.55    4.15
   6   5 -13   12.47    3.41
  -6  -4  13    6.94    4.11
   6   4 -13    6.08    3.35
  -6  -3  13   16.86    4.65
   6   3 -13   16.63    3.77
  -6  -2  13    7.21    4.15
   6   2 -13    9.90    3.52
  -6  -1  13   80.40    7.47
   6   1 -13   91.33    7.86
  -6   0  13    2.32    3.54
   6   0 -13   -1.99    3.49
  -6   1  13   76.29    6.93
   6  -1 -13   68.36    6.54
  -6   2  13    1.81    3.29
   6  -2 -13    8.81    3.59
  -6   3  13   18.73    3.82
   6  -3 -13   17.37    3.72
  -6   4  13   -0.15    3.09
   6  -4 -13    4.64    2.93
  -6   5  13   10.85    3.69
   6  -5 -13   12.39    3.33
  -6   6  13   19.40    3.56
   6  -6 -13   11.04    3.52
  -6   7  13   57.21    5.97
   6  -7 -13   64.21    6.23
  -6   8  13   -6.13    3.74
   6  -8 -13    7.26    3.38
  -6   9  13  175.20   13.36
   6  -9 -13  171.50   13.03
  -6  10  13   19.05    3.67
   6 -10 -13   26.75    3.86
  -6  11  13   50.89    5.48
   6 -11 -13   40.33    4.46
  -6  12  13   79.11    7.16
   6 -12 -13   82.69    6.93
  -6  13  13    3.09    3.19
   6 -13 -13    8.29    2.74
  -6  14  13   58.65    5.97
   6 -14 -13   67.78    6.20
  -6  15  13   53.74    5.68
   6 -15 -13   71.76    6.38
  -6  16  13   -4.03    4.09
   6 -16 -13    2.25    2.40
  -6  17  13   -1.53    3.66
   6 -17 -13    1.45    2.42
  -6  18  13  126.90    9.89
   6 -18 -13  121.40    9.43
  -6  19  13   80.00    7.00
   6 -19 -13   73.22    6.48
   6  21 -12   36.59    4.88
   6  20 -12   33.16    4.73
   6  19 -12    3.52    3.58
   6  18 -12  150.40   11.67
   6  17 -12    5.96    3.50
   6  16 -12   55.14    5.68
   6  15 -12   81.34    7.21
   6  14 -12  102.60    8.64
   6  13 -12   15.82    3.77
   6  12 -12  271.40   19.88
   6  11 -12  112.10    9.21
   6  10 -12   18.07    3.85
   6   9 -12  677.20   47.68
   6   8 -12  566.10   40.04
  -6  -7  12  349.60   25.14
   6   7 -12  324.70   23.49
  -6  -6  12  165.90   12.84
   6   6 -12  163.00   12.52
  -6  -5  12  511.10   36.31
   6   5 -12  494.90   35.19
  -6  -4  12   -1.10    3.91
   6   4 -12    6.59    3.47
  -6  -3  12    3.33    4.03
   6   3 -12   15.32    3.62
  -6  -2  12  183.90   14.13
   6   2 -12  174.20   13.24
  -6  -1  12  185.40   14.27
   6   1 -12  171.70   13.12
  -6   0  12   71.33    7.02
   6   0 -12   60.21    5.99
  -6   1  12  186.20   14.24
   6  -1 -12  186.80   13.96
  -6   2  12  182.90   13.94
   6  -2 -12  173.00   13.17
  -6   3  12    3.40    3.44
   6  -3 -12    3.20    3.46
  -6   4  12    7.81    3.34
   6  -4 -12   -2.80    2.74
  -6   5  12  501.30   35.51
   6  -5 -12  555.70   39.32
  -6   6  12  105.90    8.82
   6  -6 -12  153.00   11.82
  -6   7  12  327.30   23.68
   6  -7 -12  335.00   24.13
  -6   8  12  539.00   38.23
   6  -8 -12  564.20   39.88
  -6   9  12  701.80   49.45
   6  -9 -12  697.10   49.08
  -6  10  12   21.63    4.55
   6 -10 -12   29.50    4.39
  -6  11  12  125.10   10.13
   6 -11 -12  116.10    9.44
  -6  12  12  242.90   17.93
   6 -12 -12  247.40   18.11
  -6  13  12    7.86    3.51
   6 -13 -12   20.29    3.64
  -6  14  12   72.34    6.68
   6 -14 -12  104.60    8.49
  -6  15  12   70.12    6.83
   6 -15 -12   86.21    7.42
  -6  16  12   42.36    5.26
   6 -16 -12   41.98    4.93
  -6  17  12   -0.21    3.70
   6 -17 -12    8.08    3.35
  -6  18  12  147.20   11.54
   6 -18 -12  136.30   10.60
  -6  19  12    3.32    3.28
   6 -19 -12    7.85    2.97
  -6  20  12   34.45    4.30
   6 -20 -12   34.28    3.88
  -6  21  12   35.36    4.79
   6 -21 -12   20.71    3.46
   6  23 -11   12.57    4.90
   6  22 -11  101.70    8.73
   6  21 -11    1.92    3.61
   6  20 -11  203.10   15.19
   6  19 -11   30.43    4.35
   6  18 -11   18.92    3.95
   6  17 -11  287.30   20.93
   6  16 -11  690.80   48.64
   6  15 -11  211.80   15.76
   6  14 -11  120.90    9.78
   6  13 -11  374.70   26.88
   6  12 -11   34.06    4.66
   6  11 -11 1066.00   74.48
   6  10 -11   11.79    3.48
   6   9 -11 1174.00   81.97
   6   8 -11  205.90   15.42
  -6  -7  11   87.58    7.72
   6   7 -11   92.19    7.97
  -6  -6  11   16.12    4.15
   6   6 -11   24.30    4.11
  -6  -5  11    8.29    4.03
   6   5 -11   11.88    3.67
  -6  -4  11  430.40   30.93
   6   4 -11  455.00   32.47
  -6  -3  11  182.80   14.26
   6   3 -11  152.90   11.93
  -6  -2  11   23.89    4.76
   6   2 -11   24.90    4.12
  -6  -1  11  483.90   34.70
   6   1 -11  490.40   34.90
  -6   0  11    3.91    4.11
   6   0 -11    0.77    3.30
  -6   1  11  485.20   34.73
   6  -1 -11  458.00   32.63
  -6   2  11   20.58    4.49
   6  -2 -11   24.80    4.11
  -6   3  11  206.00   15.90
   6  -3 -11  155.70   12.04
  -6   4  11  451.60   32.14
   6  -4 -11  385.30   27.66
  -6   5  11    5.13    3.61
   6  -5 -11    7.00    3.08
  -6   6  11   13.37    3.86
   6  -6 -11   16.48    3.73
  -6   7  11   82.16    7.37
   6  -7 -11   95.39    7.97
  -6   8  11  209.90   15.71
   6  -8 -11  193.40   14.43
  -6   9  11 1118.00   78.09
   6  -9 -11 1338.00   93.25
  -6  10  11    9.86    4.20
   6 -10 -11   11.88    3.40
  -6  11  11 1026.00   71.83
   6 -11 -11 1005.00   70.23
  -6  12  11   34.26    5.06
   6 -12 -11   38.17    4.65
  -6  13  11  344.00   24.92
   6 -13 -11  425.80   30.40
  -6  14  11  140.40   11.20
   6 -14 -11  126.60   10.12
  -6  15  11  194.00   14.57
   6 -15 -11  194.40   14.58
  -6  16  11  695.70   48.83
   6 -16 -11  668.70   47.03
  -6  17  11  295.00   21.47
   6 -17 -11  276.30   20.11
  -6  18  11   23.72    4.35
   6 -18 -11   16.60    3.71
  -6  19  11   30.11    4.46
   6 -19 -11   34.88    4.54
  -6  20  11  218.60   16.17
   6 -20 -11  229.70   16.95
  -6  21  11    0.87    3.36
   6 -21 -11    5.18    3.43
  -6  22  11  100.60    8.17
   6 -22 -11   43.53    4.84
  -6  23  11    1.84    3.61
   6 -23 -11    5.38    3.06
   6  25 -10    8.85    5.66
   6  24 -10    7.81    5.07
   6  23 -10   -4.72    4.73
   6  22 -10   89.71    8.32
   6  21 -10    2.34    4.28
   6  20 -10  102.00    8.98
   6  19 -10   46.92    5.60
   6  18 -10    5.40    3.80
   6  17 -10  348.60   25.02
   6  16 -10  123.00    9.85
   6  15 -10   -3.53    3.28
   6  14 -10  236.40   17.45
   6  13 -10   60.09    5.94
   6  12 -10   51.71    5.42
   6  11 -10   18.77    3.79
   6  10 -10 1002.00   70.08
   6   9 -10   19.34    3.86
   6   8 -10   55.50    5.61
  -6  -7  10  108.80    8.98
   6   7 -10  101.70    8.43
  -6  -6  10   -2.56    3.67
   6   6 -10    2.19    2.90
  -6  -5  10   22.59    4.14
   6   5 -10   11.78    3.56
  -6  -4  10   93.95    8.39
   6   4 -10   84.80    7.43
  -6  -3  10 1141.00   79.84
   6   3 -10 1153.00   80.60
  -6  -2  10  800.00   56.38
   6   2 -10  775.10   54.50
  -6  -1  10  123.10   10.42
   6   1 -10  109.60    9.12
  -6   0  10  586.40   41.73
   6   0 -10  569.50   40.32
  -6   1  10  126.80   10.50
   6  -1 -10  137.70   10.88
  -6   2  10  902.10   63.48
   6  -2 -10  755.10   53.10
  -6   3  10 1146.00   79.97
   6  -3 -10 1052.00   73.65
  -6   4  10   88.43    7.70
   6  -4 -10   92.03    8.00
  -6   5  10    8.70    3.64
   6  -5 -10   21.85    3.60
  -6   6  10    2.43    3.46
   6  -6 -10    2.38    3.56
  -6   7  10  120.10    9.81
   6  -7 -10   95.11    8.10
  -6   8  10   50.72    5.65
   6  -8 -10   57.04    5.93
  -6   9  10   23.25    4.03
   6  -9 -10   22.08    3.88
  -6  10  10 1070.00   74.85
[truncated: 217,573 more chars]
