# Supplementary material for: 3D Metal–Organic Frameworks Based on Co(II) and Bithiophendicarboxylate: Synthesis, Crystal Structures, Gas Adsorption, and Magnetic Properties
Source: Molecules. 2021 Feb 26;26(5):1269. doi: 10.3390/molecules26051269 (PMC7956319; doi:10.3390/molecules26051269)
Supplement: Supplementary file 1 [file molecules-26-01269-s001.zip › 2.cif]

# [Co3(dmf)2(pz)(C10H4S2O4)3]*4DMF*1.5H2O
data_pz-8_sq

_audit_creation_method           SHELXL-2018/3
_shelx_SHELXL_version_number     2018/3
_chemical_name_systematic        ?
_chemical_name_common            ?
_chemical_melting_point          ?
_chemical_formula_moiety         ?
_chemical_formula_sum            'C52 H61 Co3 N8 O19.50 S6'
_chemical_formula_weight         1479.23

loop_
_atom_type_symbol
_atom_type_description
_atom_type_scat_dispersion_real
_atom_type_scat_dispersion_imag
_atom_type_scat_source
C C 0.0046 0.0022 'International Tables Vol C Tables 4.2.6.8 and 6.1.1.4'
H H 0.0000 0.0000 'International Tables Vol C Tables 4.2.6.8 and 6.1.1.4'
N N 0.0087 0.0044 'International Tables Vol C Tables 4.2.6.8 and 6.1.1.4'
O O 0.0147 0.0080 'International Tables Vol C Tables 4.2.6.8 and 6.1.1.4'
S S 0.1503 0.1565 'International Tables Vol C Tables 4.2.6.8 and 6.1.1.4'
Co Co 0.3455 1.1930 'International Tables Vol C Tables 4.2.6.8 and 6.1.1.4'

_space_group_crystal_system      orthorhombic
_space_group_IT_number           70
_space_group_name_H-M_alt        'F d d d'
_space_group_name_Hall           '-F 2uv 2vw'

_shelx_space_group_comment       
;
The symmetry employed for this shelxl refinement is uniquely defined
by the following loop, which should always be used as a source of
symmetry information in preference to the above space-group names.
They are only intended as comments.
;

loop_
_space_group_symop_operation_xyz
'x, y, z'
'-x+3/4, -y+3/4, z'
'-x+3/4, y, -z+3/4'
'x, -y+3/4, -z+3/4'
'x, y+1/2, z+1/2'
'-x+3/4, -y+5/4, z+1/2'
'-x+3/4, y+1/2, -z+5/4'
'x, -y+5/4, -z+5/4'
'x+1/2, y, z+1/2'
'-x+5/4, -y+3/4, z+1/2'
'-x+5/4, y, -z+5/4'
'x+1/2, -y+3/4, -z+5/4'
'x+1/2, y+1/2, z'
'-x+5/4, -y+5/4, z'
'-x+5/4, y+1/2, -z+3/4'
'x+1/2, -y+5/4, -z+3/4'
'-x, -y, -z'
'x-3/4, y-3/4, -z'
'x-3/4, -y, z-3/4'
'-x, y-3/4, z-3/4'
'-x, -y+1/2, -z+1/2'
'x-3/4, y-1/4, -z+1/2'
'x-3/4, -y+1/2, z-1/4'
'-x, y-1/4, z-1/4'
'-x+1/2, -y, -z+1/2'
'x-1/4, y-3/4, -z+1/2'
'x-1/4, -y, z-1/4'
'-x+1/2, y-3/4, z-1/4'
'-x+1/2, -y+1/2, -z'
'x-1/4, y-1/4, -z'
'x-1/4, -y+1/2, z-3/4'
'-x+1/2, y-1/4, z-3/4'

_cell_length_a                   11.746(2)
_cell_length_b                   42.150(4)
_cell_length_c                   51.849(2)
_cell_angle_alpha                90
_cell_angle_beta                 90
_cell_angle_gamma                90
_cell_volume                     25670(5)
_cell_formula_units_Z            16
_cell_measurement_temperature    100(2)
_cell_measurement_reflns_used    34823
_cell_measurement_theta_min      1.4
_cell_measurement_theta_max      31.0

_exptl_crystal_description       stick
_exptl_crystal_colour            purple
_exptl_crystal_density_meas      ?
_exptl_crystal_density_method    ?
_exptl_crystal_density_diffrn    1.531
_exptl_crystal_F_000             12192
_exptl_transmission_factor_min   ?
_exptl_transmission_factor_max   ?
_exptl_crystal_size_max          0.10
_exptl_crystal_size_mid          0.05
_exptl_crystal_size_min          0.05
_exptl_absorpt_coefficient_mu    1.392
_shelx_estimated_absorpt_T_min   0.873
_shelx_estimated_absorpt_T_max   0.934
_exptl_absorpt_correction_type   multi-scan
_exptl_absorpt_correction_T_min  0.7845
_exptl_absorpt_correction_T_max  1.0000
_exptl_absorpt_process_details   'XDS (Kabsch, 2010)'
_exptl_absorpt_special_details   ?

_diffrn_radiation_source         synchrotron
_diffrn_radiation_monochromator  'Double Crystal Monochromator'
_diffrn_ambient_temperature      100(2)
_diffrn_radiation_wavelength     0.79313
_diffrn_radiation_type           synchrotron
_diffrn_source                   synchrotron
_diffrn_measurement_device_type  'Rayonix SX-165 CCD'
_diffrn_measurement_method       '\f scan'
_diffrn_detector_area_resol_mean 12.4
_diffrn_reflns_number            50295
_diffrn_reflns_av_unetI/netI     0.0337
_diffrn_reflns_av_R_equivalents  0.0585
_diffrn_reflns_limit_h_min       -15
_diffrn_reflns_limit_h_max       15
_diffrn_reflns_limit_k_min       -54
_diffrn_reflns_limit_k_max       54
_diffrn_reflns_limit_l_min       -59
_diffrn_reflns_limit_l_max       64
_diffrn_reflns_theta_min         1.390
_diffrn_reflns_theta_max         31.034
_diffrn_reflns_theta_full        28.500
_diffrn_measured_fraction_theta_max 0.973
_diffrn_measured_fraction_theta_full 0.981
_diffrn_reflns_Laue_measured_fraction_max 0.973
_diffrn_reflns_Laue_measured_fraction_full 0.981
_diffrn_reflns_point_group_measured_fraction_max 0.973
_diffrn_reflns_point_group_measured_fraction_full 0.981
_reflns_number_total             7189
_reflns_number_gt                6073
_reflns_threshold_expression     'I > 2\s(I)'
_reflns_Friedel_coverage         0.000
_reflns_Friedel_fraction_max     .
_reflns_Friedel_fraction_full    .

_reflns_special_details          
;
 Reflections were merged by SHELXL according to the crystal
 class for the calculation of statistics and refinement.
 
 Structure factors included contributions from the .fab file.
 
 _reflns_Friedel_fraction is defined as the number of unique
 Friedel pairs measured divided by the number that would be
 possible theoretically, ignoring centric projections and
 systematic absences.
;
_computing_data_collection       'Marccd (Doyle, 2011)'
_computing_cell_refinement       'XDS (Kabsch, 2010)'
_computing_data_reduction        'XDS (Kabsch, 2010)'
_computing_structure_solution    'SHELXT-2018 (Sheldrick, 2015)'
_computing_structure_refinement  'SHELXL-2018 (Sheldrick, 2015)'
_computing_molecular_graphics    'ShelXle (H\"ubschle, 2011)'
_computing_publication_material  'CIFTAB (Sheldrick, 2015)'

_refine_special_details          ?
_refine_ls_structure_factor_coef Fsqd
_refine_ls_matrix_type           full
_refine_ls_weighting_scheme      calc
_refine_ls_weighting_details     
'w=1/[\s^2^(Fo^2^)+(0.0555P)^2^+38.4600P] where P=(Fo^2^+2Fc^2^)/3'
_atom_sites_solution_primary     dual
_atom_sites_solution_secondary   difmap
_atom_sites_solution_hydrogens   geom
_refine_ls_hydrogen_treatment    constr
_refine_ls_extinction_method     'SHELXL-2018/3 (Sheldrick 2018)'
_refine_ls_extinction_coef       0.000244(16)
_refine_ls_extinction_expression Fc^*^=kFc[1+0.001xFc^2^\l^3^/sin(2\q)]^-1/4^
_refine_ls_number_reflns         7189
_refine_ls_number_parameters     307
_refine_ls_number_restraints     6
_refine_ls_R_factor_all          0.0442
_refine_ls_R_factor_gt           0.0361
_refine_ls_wR_factor_ref         0.0997
_refine_ls_wR_factor_gt          0.0961
_refine_ls_goodness_of_fit_ref   1.073
_refine_ls_restrained_S_all      1.078
_refine_ls_shift/su_max          0.004
_refine_ls_shift/su_mean         0.000

loop_
_atom_site_label
_atom_site_type_symbol
_atom_site_fract_x
_atom_site_fract_y
_atom_site_fract_z
_atom_site_U_iso_or_equiv
_atom_site_adp_type
_atom_site_occupancy
_atom_site_site_symmetry_order
_atom_site_calc_flag
_atom_site_refinement_flags_posn
_atom_site_refinement_flags_adp
_atom_site_refinement_flags_occupancy
_atom_site_disorder_assembly
_atom_site_disorder_group
Co1 Co 0.49059(2) 0.45282(2) 0.74160(2) 0.02286(9) Uani 1 1 d . . . . .
Co2 Co 0.250000 0.500000 0.750000 0.02210(10) Uani 1 2 d S . P . .
N1 N 0.42183(15) 0.40556(4) 0.74213(3) 0.0282(3) Uani 1 1 d . . . . .
C1 C 0.48745(18) 0.37953(5) 0.74201(5) 0.0335(5) Uani 1 1 d . . . . .
H1 H 0.567852 0.381932 0.741629 0.040 Uiso 1 1 calc R U . . .
C2 C 0.44145(19) 0.34908(5) 0.74242(4) 0.0333(4) Uani 1 1 d . . . . .
H2 H 0.490973 0.331275 0.742907 0.040 Uiso 1 1 calc R U . . .
O11 O 0.42166(12) 0.45918(4) 0.70643(3) 0.0307(3) Uani 1 1 d . . . . .
O12 O 0.24111(11) 0.47173(3) 0.71721(3) 0.0264(3) Uani 1 1 d . . . . .
C11 C 0.31748(17) 0.46351(5) 0.70151(4) 0.0260(4) Uani 1 1 d . . . . .
C12 C 0.28263(17) 0.45814(5) 0.67443(4) 0.0276(4) Uani 1 1 d . . . . .
C13 C 0.34927(19) 0.45309(6) 0.65341(4) 0.0376(5) Uani 1 1 d . . . . .
H13 H 0.429901 0.451582 0.654130 0.045 Uiso 1 1 calc R U . . .
C14 C 0.2858(2) 0.45032(6) 0.63035(4) 0.0394(5) Uani 1 1 d . . . . .
H14 H 0.319037 0.446908 0.613886 0.047 Uiso 1 1 calc R U . . .
C15 C 0.17085(18) 0.45310(5) 0.63439(4) 0.0303(4) Uani 1 1 d . . . . .
S1 S 0.14091(4) 0.45943(2) 0.66645(2) 0.02823(12) Uani 1 1 d . . . . .
O21 O 0.55218(12) 0.49843(3) 0.74111(3) 0.0303(3) Uani 1 1 d . . . . .
O22 O 0.38790(12) 0.52573(3) 0.73636(3) 0.0267(3) Uani 1 1 d . . . . .
C21 C 0.49429(16) 0.52283(4) 0.73632(4) 0.0266(4) Uani 1 1 d . . . . .
C22 C 0.56140(17) 0.55190(5) 0.73059(4) 0.0307(4) Uani 1 1 d . . . . .
C23 C 0.67522(19) 0.55481(5) 0.72553(5) 0.0394(5) Uani 1 1 d . . . . .
H23 H 0.725546 0.537226 0.724333 0.047 Uiso 1 1 calc R U . . .
C24 C 0.71017(19) 0.58647(5) 0.72227(5) 0.0397(5) Uani 1 1 d . . . . .
H24 H 0.786602 0.592448 0.718762 0.048 Uiso 1 1 calc R U . . .
C25 C 0.62283(19) 0.60786(5) 0.72468(5) 0.0355(5) Uani 1 1 d . . . . .
S2 S 0.49572(4) 0.58853(2) 0.73081(2) 0.03445(14) Uani 1 1 d . . . . .
O31 O 0.14373(11) 0.53510(3) 0.73186(3) 0.0251(3) Uani 1 1 d . . . . .
O32 O -0.02372(12) 0.54991(4) 0.71722(3) 0.0316(3) Uani 1 1 d . . . . .
C31 C 0.07744(17) 0.54126(5) 0.71299(4) 0.0271(4) Uani 1 1 d . . . . .
C32 C 0.12064(19) 0.53963(5) 0.68652(4) 0.0291(4) Uani 1 1 d . . . . .
C33 C 0.23095(19) 0.53734(5) 0.67826(4) 0.0328(4) Uani 1 1 d . . . . .
H33 H 0.294421 0.535867 0.689551 0.039 Uiso 1 1 calc R U . . .
C34 C 0.2401(2) 0.53742(6) 0.65111(4) 0.0355(5) Uani 1 1 d . . . . .
H34 H 0.310748 0.536190 0.642237 0.043 Uiso 1 1 calc R U . . .
C35 C 0.1365(2) 0.53947(5) 0.63873(4) 0.0321(4) Uani 1 1 d . . . . .
S3 S 0.02707(5) 0.54217(2) 0.66085(2) 0.03240(13) Uani 1 1 d . . . . .
O1D O 0.64025(12) 0.43567(3) 0.72646(3) 0.0307(3) Uani 1 1 d . . . . .
C11D C 0.7135(2) 0.45465(6) 0.71849(6) 0.0511(7) Uani 1 1 d . . . . .
H11D H 0.698506 0.476586 0.720998 0.061 Uiso 1 1 calc R U . . .
N1D N 0.8085(2) 0.44732(6) 0.70705(5) 0.0543(6) Uani 1 1 d . . . . .
C12D C 0.8898(3) 0.47139(10) 0.69907(8) 0.0912(15) Uani 1 1 d . U . . .
H12A H 0.966176 0.465396 0.704924 0.137 Uiso 1 1 calc R U . . .
H12B H 0.868743 0.491846 0.706687 0.137 Uiso 1 1 calc R U . . .
H12C H 0.889355 0.473162 0.680227 0.137 Uiso 1 1 calc R U . . .
C13D C 0.8401(3) 0.41490(9) 0.70276(8) 0.0796(11) Uani 1 1 d . . . . .
H13A H 0.917419 0.411328 0.709268 0.119 Uiso 1 1 calc R U . . .
H13B H 0.837766 0.410302 0.684241 0.119 Uiso 1 1 calc R U . . .
H13C H 0.786892 0.400913 0.711838 0.119 Uiso 1 1 calc R U . . .

loop_
_atom_site_aniso_label
_atom_site_aniso_U_11
_atom_site_aniso_U_22
_atom_site_aniso_U_33
_atom_site_aniso_U_23
_atom_site_aniso_U_13
_atom_site_aniso_U_12
Co1 0.02267(14) 0.02215(14) 0.02377(16) 0.00045(9) -0.00033(9) -0.00076(9)
Co2 0.02199(17) 0.02139(17) 0.0229(2) 0.00003(13) -0.00002(13) -0.00091(12)
N1 0.0293(8) 0.0228(8) 0.0325(9) 0.0005(6) 0.0015(7) -0.0022(6)
C1 0.0283(10) 0.0264(10) 0.0457(13) -0.0005(8) 0.0006(9) -0.0007(8)
C2 0.0285(10) 0.0253(9) 0.0460(13) -0.0005(8) 0.0004(9) 0.0003(7)
O11 0.0270(7) 0.0380(8) 0.0270(8) -0.0003(6) -0.0039(5) 0.0015(6)
O12 0.0284(7) 0.0272(7) 0.0236(7) -0.0031(5) 0.0003(5) -0.0004(5)
C11 0.0277(9) 0.0257(9) 0.0245(10) 0.0002(7) -0.0012(7) -0.0002(7)
C12 0.0275(9) 0.0299(9) 0.0253(10) -0.0004(7) -0.0034(7) 0.0022(7)
C13 0.0282(10) 0.0542(14) 0.0303(12) -0.0048(9) -0.0025(8) 0.0039(9)
C14 0.0335(11) 0.0593(15) 0.0254(12) -0.0051(9) -0.0001(8) 0.0060(10)
C15 0.0316(10) 0.0324(10) 0.0270(11) -0.0016(8) -0.0025(8) 0.0016(8)
S1 0.0261(2) 0.0345(3) 0.0241(3) -0.00163(18) -0.00187(17) 0.00175(18)
O21 0.0279(7) 0.0223(7) 0.0409(9) 0.0005(6) -0.0033(6) -0.0015(5)
O22 0.0243(6) 0.0249(6) 0.0311(8) 0.0014(5) 0.0015(5) -0.0036(5)
C21 0.0262(9) 0.0226(9) 0.0309(11) -0.0013(7) 0.0002(7) -0.0024(7)
C22 0.0249(9) 0.0236(9) 0.0435(12) 0.0004(8) -0.0015(8) -0.0034(7)
C23 0.0291(10) 0.0251(10) 0.0640(16) -0.0004(10) 0.0016(10) -0.0013(8)
C24 0.0253(10) 0.0274(10) 0.0665(16) -0.0003(10) 0.0020(10) -0.0048(8)
C25 0.0271(10) 0.0277(11) 0.0516(14) 0.0002(9) -0.0001(9) -0.0050(8)
S2 0.0238(2) 0.0232(2) 0.0564(4) 0.0006(2) 0.0023(2) -0.00258(17)
O31 0.0273(7) 0.0244(6) 0.0237(7) 0.0009(5) 0.0002(5) 0.0026(5)
O32 0.0291(7) 0.0386(8) 0.0270(8) 0.0009(6) -0.0009(6) 0.0048(6)
C31 0.0322(10) 0.0240(9) 0.0251(10) 0.0008(7) 0.0006(7) 0.0008(7)
C32 0.0368(10) 0.0275(9) 0.0229(10) 0.0016(7) -0.0004(8) -0.0001(8)
C33 0.0374(11) 0.0344(11) 0.0268(11) 0.0006(8) 0.0004(8) -0.0020(8)
C34 0.0389(11) 0.0409(12) 0.0268(12) -0.0006(9) 0.0037(8) -0.0034(9)
C35 0.0420(11) 0.0282(9) 0.0259(11) -0.0011(8) 0.0029(8) -0.0014(8)
S3 0.0369(3) 0.0367(3) 0.0237(3) 0.00085(19) -0.00058(19) 0.0046(2)
O1D 0.0255(7) 0.0309(7) 0.0357(8) -0.0024(6) 0.0035(6) 0.0002(5)
C11D 0.0437(14) 0.0414(13) 0.0682(19) -0.0183(12) 0.0267(13) -0.0114(11)
N1D 0.0376(11) 0.0654(15) 0.0598(15) -0.0228(12) 0.0165(10) -0.0120(10)
C12D 0.068(2) 0.101(3) 0.104(3) -0.048(2) 0.056(2) -0.043(2)
C13D 0.066(2) 0.085(3) 0.088(3) 0.006(2) 0.0316(19) 0.0315(19)

_geom_special_details            
;
 All esds (except the esd in the dihedral angle between two l.s. planes)
 are estimated using the full covariance matrix.  The cell esds are taken
 into account individually in the estimation of esds in distances, angles
 and torsion angles; correlations between esds in cell parameters are only
 used when they are defined by crystal symmetry.  An approximate (isotropic)
 treatment of cell esds is used for estimating esds involving l.s. planes.
;

loop_
_geom_bond_atom_site_label_1
_geom_bond_atom_site_label_2
_geom_bond_distance
_geom_bond_site_symmetry_2
_geom_bond_publ_flag
Co1 N1 2.1498(17) . yes
Co1 O11 2.0129(14) . yes
Co1 O21 2.0540(14) . yes
Co1 O31 2.1547(14) 25_566 yes
Co1 O32 2.1732(15) 25_566 yes
Co1 C31 2.499(2) 25_566 ?
Co1 O1D 2.0564(15) . yes
Co2 O12 2.0786(14) . yes
Co2 O12 2.0786(14) 25_566 ?
Co2 O22 2.0737(14) . yes
Co2 O22 2.0737(14) 25_566 ?
Co2 O31 2.1519(13) . yes
Co2 O31 2.1520(13) 25_566 ?
N1 C1 1.341(3) . ?
N1 C2 1.345(3) 2 ?
C1 H1 0.9500 . ?
C1 C2 1.393(3) . ?
C2 H2 0.9500 . ?
O11 C11 1.263(2) . ?
O12 C11 1.260(2) . ?
C11 C12 1.480(3) . ?
C12 C13 1.359(3) . ?
C12 S1 1.716(2) . ?
C13 H13 0.9500 . ?
C13 C14 1.414(3) . ?
C14 H14 0.9500 . ?
C14 C15 1.371(3) . ?
C15 C15 1.452(4) 11_455 ?
C15 S1 1.720(2) . ?
O21 C21 1.258(2) . ?
O22 C21 1.256(2) . ?
C21 C22 1.487(3) . ?
C22 C23 1.368(3) . ?
C22 S2 1.726(2) . ?
C23 H23 0.9500 . ?
C23 C24 1.407(3) . ?
C24 H24 0.9500 . ?
C24 C25 1.371(3) . ?
C25 C25 1.446(4) 14 ?
C25 S2 1.730(2) . ?
O31 C31 1.277(2) . ?
O32 C31 1.262(3) . ?
C31 C32 1.465(3) . ?
C32 C33 1.368(3) . ?
C32 S3 1.730(2) . ?
C33 H33 0.9500 . ?
C33 C34 1.412(3) . ?
C34 H34 0.9500 . ?
C34 C35 1.378(3) . ?
C35 C35 1.449(4) 11_455 ?
C35 S3 1.727(2) . ?
O1D C11D 1.245(3) . ?
C11D H11D 0.9500 . ?
C11D N1D 1.301(3) . ?
N1D C12D 1.454(4) . ?
N1D C13D 1.434(4) . ?
C12D H12A 0.9800 . ?
C12D H12B 0.9800 . ?
C12D H12C 0.9800 . ?
C13D H13A 0.9800 . ?
C13D H13B 0.9800 . ?
C13D H13C 0.9800 . ?

loop_
_geom_angle_atom_site_label_1
_geom_angle_atom_site_label_2
_geom_angle_atom_site_label_3
_geom_angle
_geom_angle_site_symmetry_1
_geom_angle_site_symmetry_3
_geom_angle_publ_flag
N1 Co1 O31 86.32(6) . 25_566 yes
N1 Co1 O32 90.32(6) . 25_566 yes
N1 Co1 C31 87.73(7) . 25_566 yes
O11 Co1 N1 89.07(7) . . yes
O11 Co1 O21 90.34(6) . . yes
O11 Co1 O31 104.63(6) . 25_566 yes
O11 Co1 O32 165.69(6) . 25_566 yes
O11 Co1 C31 135.36(7) . 25_566 ?
O11 Co1 O1D 92.57(6) . . yes
O21 Co1 N1 178.55(6) . . yes
O21 Co1 O31 92.55(6) . 25_566 yes
O21 Co1 O32 89.92(6) . 25_566 yes
O21 Co1 C31 91.76(6) . 25_566 ?
O21 Co1 O1D 91.33(6) . . yes
O31 Co1 O32 61.06(5) 25_566 25_566 yes
O31 Co1 C31 30.73(6) 25_566 25_566 ?
O32 Co1 C31 30.33(6) 25_566 25_566 ?
O1D Co1 N1 90.01(6) . . yes
O1D Co1 O31 162.33(6) . 25_566 yes
O1D Co1 O32 101.73(6) . 25_566 yes
O1D Co1 C31 131.92(6) . 25_566 ?
O12 Co2 O12 180.0 25_566 . yes
O12 Co2 O31 89.57(5) . 25_566 yes
O12 Co2 O31 89.57(5) 25_566 . ?
O12 Co2 O31 90.43(5) . . yes
O12 Co2 O31 90.43(5) 25_566 25_566 ?
O22 Co2 O12 86.55(5) . 25_566 yes
O22 Co2 O12 86.55(5) 25_566 . ?
O22 Co2 O12 93.45(5) . . yes
O22 Co2 O12 93.45(5) 25_566 25_566 ?
O22 Co2 O22 180.0 25_566 . yes
O22 Co2 O31 86.81(5) . . yes
O22 Co2 O31 86.81(5) 25_566 25_566 ?
O22 Co2 O31 93.19(5) . 25_566 yes
O22 Co2 O31 93.19(5) 25_566 . ?
O31 Co2 O31 180.0 . 25_566 yes
C1 N1 Co1 122.84(14) . . ?
C1 N1 C2 116.72(18) . 2 ?
C2 N1 Co1 120.44(14) 2 . ?
N1 C1 H1 119.0 . . ?
N1 C1 C2 122.1(2) . . ?
C2 C1 H1 119.0 . . ?
N1 C2 C1 121.19(19) 2 . ?
N1 C2 H2 119.4 2 . ?
C1 C2 H2 119.4 . . ?
C11 O11 Co1 126.29(14) . . ?
C11 O12 Co2 130.57(13) . . ?
O11 C11 C12 115.95(18) . . ?
O12 C11 O11 126.79(19) . . ?
O12 C11 C12 117.27(18) . . ?
C11 C12 S1 119.50(15) . . ?
C13 C12 C11 128.73(19) . . ?
C13 C12 S1 111.73(16) . . ?
C12 C13 H13 123.6 . . ?
C12 C13 C14 112.8(2) . . ?
C14 C13 H13 123.6 . . ?
C13 C14 H14 123.7 . . ?
C15 C14 C13 112.5(2) . . ?
C15 C14 H14 123.7 . . ?
C14 C15 C15 128.9(3) . 11_455 ?
C14 C15 S1 111.23(16) . . ?
C15 C15 S1 119.8(2) 11_455 . ?
C12 S1 C15 91.72(10) . . ?
C21 O21 Co1 125.27(13) . . ?
C21 O22 Co2 136.64(13) . . ?
O21 C21 C22 115.26(17) . . ?
O22 C21 O21 128.11(18) . . ?
O22 C21 C22 116.61(17) . . ?
C21 C22 S2 119.92(15) . . ?
C23 C22 C21 129.08(19) . . ?
C23 C22 S2 110.97(15) . . ?
C22 C23 H23 123.4 . . ?
C22 C23 C24 113.2(2) . . ?
C24 C23 H23 123.4 . . ?
C23 C24 H24 123.4 . . ?
C25 C24 C23 113.2(2) . . ?
C25 C24 H24 123.4 . . ?
C24 C25 C25 129.1(3) . 14 ?
C24 C25 S2 110.66(16) . . ?
C25 C25 S2 120.1(2) 14 . ?
C22 S2 C25 91.97(10) . . ?
Co2 O31 Co1 107.94(6) . 25_566 ?
C31 O31 Co1 89.70(12) . 25_566 ?
C31 O31 Co2 145.93(13) . . ?
C31 O32 Co1 89.25(12) . 25_566 ?
O31 C31 Co1 59.56(10) . 25_566 ?
O31 C31 C32 119.80(18) . . ?
O32 C31 Co1 60.42(11) . 25_566 ?
O32 C31 O31 119.97(18) . . ?
O32 C31 C32 120.18(18) . . ?
C32 C31 Co1 176.60(15) . 25_566 ?
C31 C32 S3 119.87(16) . . ?
C33 C32 C31 128.7(2) . . ?
C33 C32 S3 111.42(16) . . ?
C32 C33 H33 123.7 . . ?
C32 C33 C34 112.6(2) . . ?
C34 C33 H33 123.7 . . ?
C33 C34 H34 123.3 . . ?
C35 C34 C33 113.4(2) . . ?
C35 C34 H34 123.3 . . ?
C34 C35 C35 128.5(3) . 11_455 ?
C34 C35 S3 110.62(16) . . ?
C35 C35 S3 120.9(2) 11_455 . ?
C35 S3 C32 91.95(11) . . ?
C11D O1D Co1 119.42(16) . . ?
O1D C11D H11D 116.9 . . ?
O1D C11D N1D 126.2(3) . . ?
N1D C11D H11D 116.9 . . ?
C11D N1D C12D 121.8(3) . . ?
C11D N1D C13D 121.3(3) . . ?
C13D N1D C12D 116.8(3) . . ?
N1D C12D H12A 109.5 . . ?
N1D C12D H12B 109.5 . . ?
N1D C12D H12C 109.5 . . ?
H12A C12D H12B 109.5 . . ?
H12A C12D H12C 109.5 . . ?
H12B C12D H12C 109.5 . . ?
N1D C13D H13A 109.5 . . ?
N1D C13D H13B 109.5 . . ?
N1D C13D H13C 109.5 . . ?
H13A C13D H13B 109.5 . . ?
H13A C13D H13C 109.5 . . ?
H13B C13D H13C 109.5 . . ?

_refine_diff_density_max         0.390
_refine_diff_density_min         -0.517
_refine_diff_density_rms         0.069

_shelx_res_file                  
;
TITL pz-8 in Fddd; 100K; Moscow
    pz-8_sq.res
    created by SHELXL-2018/3 at 16:23:07 on 10-Mar-2020
CELL 0.79313  11.746  42.150  51.849  90.00  90.00  90.00
ZERR  16.000   0.002   0.004   0.002   0      0      0
LATT 4
SYMM 0.75-X,0.75-Y,+Z
SYMM 0.75-X,+Y,0.75-Z
SYMM +X,0.75-Y,0.75-Z
SFAC C   H   N   O   S  Co
DISP C  0.00462  0.00217 14.32469
DISP Co  0.34553  1.19303 5397.21997
DISP N  0.00868  0.00437 25.35309
DISP O  0.01466  0.00796 42.75456
DISP S  0.15032  0.15653 721.34853
UNIT 832 976 128 312 96 48
 
LIST 4 ! automatically inserted. Change 6 to 4 for CHECKCIF!!
TEMP -173
 
L.S. 6 0 98
BOND $H
FMAP 2
PLAN 5
 
OMIT 0
 
ISOR 0.01 0.01 C12D
 
ACTA 57
 
SIZE 0.10 0.05 0.05
 
ABIN
 
WGHT    0.055500   38.460018
EXTI    0.000244
FVAR       0.05809
CO1   6    0.490593    0.452824    0.741599    11.00000    0.02267    0.02215 =
         0.02377    0.00045   -0.00033   -0.00076
CO2   6    0.250000    0.500000    0.750000    10.50000    0.02199    0.02139 =
         0.02291    0.00003   -0.00002   -0.00091
N1    3    0.421832    0.405560    0.742128    11.00000    0.02925    0.02279 =
         0.03251    0.00049    0.00150   -0.00223
C1    1    0.487451    0.379529    0.742006    11.00000    0.02830    0.02644 =
         0.04571   -0.00045    0.00057   -0.00068
AFIX  43
H1    2    0.567852    0.381932    0.741629    11.00000   -1.20000
AFIX   0
C2    1    0.441450    0.349084    0.742415    11.00000    0.02855    0.02534 =
         0.04598   -0.00047    0.00040    0.00030
AFIX  43
H2    2    0.490973    0.331275    0.742907    11.00000   -1.20000
AFIX   0
O11   4    0.421662    0.459180    0.706433    11.00000    0.02705    0.03797 =
         0.02700   -0.00032   -0.00385    0.00155
O12   4    0.241108    0.471729    0.717214    11.00000    0.02836    0.02723 =
         0.02360   -0.00313    0.00031   -0.00042
C11   1    0.317481    0.463508    0.701511    11.00000    0.02774    0.02574 =
         0.02447    0.00021   -0.00121   -0.00020
C12   1    0.282628    0.458138    0.674434    11.00000    0.02755    0.02989 =
         0.02530   -0.00035   -0.00341    0.00215
C13   1    0.349266    0.453090    0.653414    11.00000    0.02816    0.05422 =
         0.03028   -0.00481   -0.00251    0.00394
AFIX  43
H13   2    0.429901    0.451582    0.654130    11.00000   -1.20000
AFIX   0
C14   1    0.285752    0.450320    0.630353    11.00000    0.03349    0.05931 =
         0.02544   -0.00506   -0.00007    0.00597
AFIX  43
H14   2    0.319037    0.446908    0.613886    11.00000   -1.20000
AFIX   0
C15   1    0.170849    0.453102    0.634387    11.00000    0.03156    0.03240 =
         0.02700   -0.00163   -0.00255    0.00160
S1    5    0.140912    0.459428    0.666447    11.00000    0.02612    0.03450 =
         0.02408   -0.00163   -0.00187    0.00175
O21   4    0.552181    0.498427    0.741113    11.00000    0.02787    0.02229 =
         0.04086    0.00047   -0.00327   -0.00154
O22   4    0.387896    0.525733    0.736358    11.00000    0.02428    0.02487 =
         0.03108    0.00138    0.00155   -0.00358
C21   1    0.494291    0.522835    0.736315    11.00000    0.02622    0.02255 =
         0.03093   -0.00125    0.00021   -0.00240
C22   1    0.561399    0.551896    0.730589    11.00000    0.02491    0.02360 =
         0.04351    0.00040   -0.00148   -0.00344
C23   1    0.675216    0.554807    0.725528    11.00000    0.02908    0.02506 =
         0.06396   -0.00044    0.00163   -0.00130
AFIX  43
H23   2    0.725546    0.537226    0.724333    11.00000   -1.20000
AFIX   0
C24   1    0.710171    0.586475    0.722274    11.00000    0.02533    0.02737 =
         0.06646   -0.00025    0.00204   -0.00475
AFIX  43
H24   2    0.786602    0.592448    0.718762    11.00000   -1.20000
AFIX   0
C25   1    0.622831    0.607857    0.724679    11.00000    0.02714    0.02775 =
         0.05163    0.00021   -0.00012   -0.00504
S2    5    0.495721    0.588529    0.730812    11.00000    0.02378    0.02319 =
         0.05638    0.00061    0.00228   -0.00258
O31   4    0.143733    0.535095    0.731861    11.00000    0.02731    0.02438 =
         0.02371    0.00092    0.00024    0.00264
O32   4   -0.023720    0.549913    0.717222    11.00000    0.02913    0.03861 =
         0.02696    0.00088   -0.00088    0.00478
C31   1    0.077438    0.541261    0.712989    11.00000    0.03218    0.02402 =
         0.02507    0.00082    0.00065    0.00078
C32   1    0.120638    0.539625    0.686523    11.00000    0.03679    0.02755 =
         0.02292    0.00156   -0.00041   -0.00007
C33   1    0.230949    0.537344    0.678259    11.00000    0.03741    0.03437 =
         0.02676    0.00061    0.00039   -0.00199
AFIX  43
H33   2    0.294421    0.535867    0.689551    11.00000   -1.20000
AFIX   0
C34   1    0.240113    0.537423    0.651105    11.00000    0.03890    0.04092 =
         0.02682   -0.00064    0.00368   -0.00341
AFIX  43
H34   2    0.310748    0.536190    0.642237    11.00000   -1.20000
AFIX   0
C35   1    0.136528    0.539467    0.638730    11.00000    0.04202    0.02824 =
         0.02592   -0.00113    0.00289   -0.00144
S3    5    0.027068    0.542172    0.660850    11.00000    0.03688    0.03666 =
         0.02367    0.00085   -0.00058    0.00459
O1D   4    0.640247    0.435671    0.726459    11.00000    0.02552    0.03087 =
         0.03569   -0.00236    0.00354    0.00021
C11D  1    0.713461    0.454652    0.718489    11.00000    0.04372    0.04141 =
         0.06818   -0.01833    0.02666   -0.01144
AFIX  43
H11D  2    0.698506    0.476586    0.720998    11.00000   -1.20000
AFIX   0
N1D   3    0.808483    0.447321    0.707054    11.00000    0.03765    0.06535 =
         0.05976   -0.02278    0.01653   -0.01203
C12D  1    0.889815    0.471393    0.699073    11.00000    0.06844    0.10086 =
         0.10433   -0.04803    0.05565   -0.04335
AFIX 137
H12A  2    0.966176    0.465396    0.704924    11.00000   -1.50000
H12B  2    0.868743    0.491846    0.706687    11.00000   -1.50000
H12C  2    0.889355    0.473162    0.680227    11.00000   -1.50000
AFIX   0
C13D  1    0.840145    0.414902    0.702760    11.00000    0.06620    0.08514 =
         0.08759    0.00575    0.03156    0.03148
AFIX 137
H13A  2    0.917419    0.411328    0.709268    11.00000   -1.50000
H13B  2    0.837766    0.410302    0.684241    11.00000   -1.50000
H13C  2    0.786892    0.400913    0.711838    11.00000   -1.50000
AFIX   0
HKLF 4
 
 
 
 
REM  pz-8 in Fddd; 100K; Moscow
REM wR2 = 0.0997, GooF = S = 1.073, Restrained GooF = 1.078 for all data
REM R1 = 0.0361 for 6073 Fo > 4sig(Fo) and 0.0442 for all 7189 data
REM 307 parameters refined using 6 restraints
 
END
 
WGHT      0.0555     38.4574
 
REM Highest difference peak  0.390,  deepest hole -0.517,  1-sigma level  0.069
Q1    1   0.2533  0.5305  0.7500  11.00000  0.05    0.39
Q2    1   0.2583  0.4766  0.7298  11.00000  0.05    0.38
Q3    1   0.4822  0.4802  0.7400  11.00000  0.05    0.32
Q4    1   0.0924  0.5409  0.6997  11.00000  0.05    0.30
Q5    1  -0.0171  0.5519  0.7308  11.00000  0.05    0.29
;
_shelx_res_checksum              39399

_shelx_hkl_file                  
;
   0   0   6    0.65    1.07
   0   0  -6    0.81    0.96
   0   0  10   -0.96    1.38
   0   0 -10    0.86    1.62
   0   0  14   -0.45    1.67
   0   0  14    0.46    1.62
   0   0  18    0.61    1.49
   0   0  18    2.84    1.55
   0   0  20  102.70    6.42
   0   0  20   93.19    5.84
   0   0  22   -0.65    1.33
   0   0  22   -0.42    1.46
   0   0  24  926.10   53.93
   0   0  24  983.90   57.28
   0   0  26   -1.09    1.26
   0   0  26    0.12    1.27
   0   0  28  347.60   20.47
   0   0  28  353.30   20.72
   0   0  30    0.71    0.99
   0   0  30   -0.53    1.00
   0   0  32    9.27    1.12
   0   0  32    7.98    1.12
   0  -2   0   -0.69    0.73
   0   2   0   -0.50    0.80
   0   2   2    4.10    1.18
   0  -2   2    4.81    1.21
   0  -2  -2    7.82    0.95
   0   2  -2    5.24    1.20
   0   2   4    0.57    1.25
   0  -2   4    0.35    1.27
   0  -2  -4    1.34    1.36
   0   2  -4    0.32    1.18
   0   2   6   53.59    3.79
   0  -2   6   49.86    3.48
   0  -2  -6   50.03    3.40
   0   2  -6   41.95    3.04
   0   2   8   -0.12    1.51
   0  -2   8   -1.29    1.75
   0  -2  -8   -0.52    1.46
   0   2  -8    0.02    1.85
   0   2  10    1.86    1.76
   0  -2  10    4.01    1.94
   0  -2 -10    2.62    1.77
   0   2 -10    2.29    1.85
   0   2  12    2.14    1.83
   0  -2  12    4.09    2.21
   0  -2  12    1.08    1.90
   0  -2 -12   -0.16    1.84
   0   2  14 1140.00   66.29
   0  -2  14 1213.00   70.53
   0  -2  14 1134.00   65.97
   0  -2 -14 1169.00   68.00
   0   2  16    1.04    1.53
   0  -2  16    0.41    1.93
   0  -2  16    0.96    1.77
   0  -2 -16    1.67    1.95
   0   2  18   32.06    2.67
   0  -2  18   25.11    2.40
   0  -2  18   30.85    2.65
   0  -2 -18   30.19    2.66
   0   2  20    0.76    1.40
   0  -2  20   -0.18    1.49
   0  -2  20   -1.08    1.86
   0  -2 -20    0.37    1.50
   0   2  22  128.10    7.81
   0  -2  22  134.60    8.27
   0  -2  22  116.50    7.19
   0  -2 -22  123.90    7.62
   0   2  24    0.05    1.19
   0   2  24    0.11    1.22
   0  -2  24    2.13    1.34
   0  -2  24    1.09    1.53
   0  -2 -24   -0.47    1.72
   0   2  26 2111.00  122.60
   0   2  26 2151.00  125.00
   0  -2  26 2185.00  126.90
   0  -2  26 2008.00  116.50
   0   2  28   -0.18    1.09
   0   2  28    1.05    1.29
   0  -2  28   -1.06    1.15
   0  -2  28    0.47    1.39
   0   2  32   -1.68    0.88
   0   2  32    1.02    1.00
   0  -2  32    1.46    1.08
   0  -2  32    0.31    1.23
   0  -2  34  467.60   27.49
   0  -2  34  556.60   32.65
   0  -2  36   -0.11    0.74
   0  -2  36   -0.80    0.70
   0   4   2   -2.23    2.47
   0  -4   2    0.51    1.94
   0  -4  -2    1.76    2.23
   0   4  -2    0.45    2.25
   0  -4   4 1266.00   73.56
   0  -4  -4 1489.00   86.39
   0   4   6    0.65    2.21
   0  -4   6   -1.92    2.52
   0  -4  -6    0.53    2.59
   0   4  -6   -1.55    2.29
   0   4   8   18.81    2.75
   0  -4   8   16.22    2.86
   0  -4  -8   20.20    2.57
   0   4  -8   17.28    2.95
   0   4  10   -1.72    2.21
   0  -4  10    0.02    2.51
   0  -4 -10   -3.44    2.34
   0   4 -10   -0.52    2.70
   0   4  12 1408.00   81.84
   0  -4  12 1329.00   77.29
   0  -4 -12 1254.00   72.94
   0   4 -12 1396.00   81.22
   0   4  14   -2.37    2.09
   0  -4  14    2.55    2.09
   0  -4 -14   -0.11    2.23
   0   4 -14   -3.27    2.50
   0   4  16    1.56    1.89
   0  -4  16    5.02    2.24
   0  -4 -16    4.74    2.16
   0   4 -16    3.50    2.45
   0   4  18   -1.12    1.76
   0  -4  18    0.19    1.79
   0  -4  18    0.17    1.84
   0  -4 -18   -0.89    1.87
   0   4  20  534.30   31.29
   0  -4  20  625.50   36.63
   0  -4  20  613.90   35.94
   0  -4 -20  638.00   37.29
   0   4  22   -1.10    1.39
   0  -4  22   -0.45    1.90
   0  -4  22    0.29    1.73
   0  -4 -22   -1.07    1.84
   0   4  24 1442.00   83.80
   0  -4  24 1531.00   88.98
   0  -4  24 1300.00   75.56
   0  -4 -24 1411.00   82.02
   0   4  26    0.62    1.15
   0  -4  26    1.30    1.50
   0  -4  26   -0.36    1.67
   0  -4 -26    1.39    1.60
   0  -4  28  105.90    6.68
   0  -4  28   96.87    6.27
   0  -4 -28   98.68    6.19
   0   4  30    2.43    1.21
   0  -4  30    0.39    1.55
   0  -4  30    1.40    1.69
   0  -4 -30    1.74    1.47
   0   4  32   52.46    3.50
   0   4  32   50.33    3.33
   0  -4  32   52.13    3.75
   0  -4  32   43.11    3.22
   0   4  34   -0.16    1.03
   0   4  34    2.26    1.03
   0  -4  34    1.81    1.24
   0  -4  34   -0.64    1.40
   0  -4  36   30.46    2.33
   0  -4  36   35.85    2.63
   0  -4  38   -0.04    0.96
   0  -4  38    0.83    1.14
   0  -6   0    3.28    2.38
   0   6   0   -2.22    3.54
   0  -6   2  156.90   10.08
   0   6  -2  134.10    8.89
   0   6   4   -2.17    3.09
   0  -6   4    1.01    3.17
   0  -6  -4    0.48    3.12
   0   6  -4    1.88    3.55
   0   6   6  866.60   50.69
   0  -6   6  850.00   49.75
   0  -6  -6  843.90   49.39
   0   6  -6  819.20   47.97
   0   6   8    0.02    3.07
   0  -6   8   -0.18    2.41
   0  -6  -8   -1.04    2.97
   0   6  -8   -3.77    3.14
   0   6  10  355.60   21.32
   0  -6  10  302.30   18.43
   0  -6 -10  305.40   18.45
   0   6 -10  292.80   17.86
   0   6  12   -1.08    2.55
   0  -6  12    0.89    3.44
   0  -6 -12   -0.86    2.66
   0   6 -12    2.45    2.89
   0  -6  14 1582.00   92.07
   0  -6 -14 1784.00  103.60
   0   6 -14 1577.00   91.74
   0   6  16   -1.77    1.95
   0  -6  16    0.34    2.71
   0  -6 -16    0.25    2.49
   0   6 -16    0.96    2.58
   0  -6  18   15.88    2.82
   0  -6 -18   17.95    2.75
   0   6 -18   12.22    2.62
   0   6  20    2.25    2.05
   0  -6  20    1.01    2.27
   0  -6 -20    0.48    2.05
   0   6 -20   -0.99    2.31
   0   6  22  267.00   15.99
   0  -6  22  255.20   15.45
   0  -6 -22  272.40   16.32
   0   6 -22  237.40   14.40
   0   6  24   -1.80    1.58
   0  -6  24   -1.36    1.87
   0  -6  24   -3.49    2.35
   0  -6 -24    1.66    1.90
   0   6  26  826.50   48.16
   0  -6  26  843.80   49.26
   0  -6  26  855.40   49.93
   0  -6 -26  870.90   50.82
   0   6  28    0.25    1.50
   0  -6  28    1.53    1.69
   0  -6  28    0.10    1.88
   0  -6 -28    2.86    1.90
   0   6  30 1148.00   66.90
   0  -6  30 1153.00   67.25
   0  -6  30 1117.00   65.19
   0  -6 -30 1160.00   67.50
   0   6  32    0.02    1.46
   0  -6  32   -1.59    1.89
   0  -6  32   -1.15    1.90
   0  -6 -32    0.41    1.54
   0   6  34   11.80    1.68
   0  -6  34    7.44    1.80
   0  -6  34    6.78    1.75
   0  -6 -34    8.95    1.64
   0   6  36    1.72    1.22
   0   6  36    1.28    1.05
   0  -6  36    2.35    1.55
   0  -6  36   -1.29    1.53
   0  -6  38   87.56    5.59
   0  -6  38   90.29    5.72
   0  -6  40    1.10    1.13
   0  -6  40    1.70    1.27
   0   8   0 3739.00  216.80
   0   8   2    3.64    4.18
   0  -8   2    0.92    3.82
   0  -8  -2    8.99    4.20
   0   8  -2   -2.67    3.86
   0   8   4  143.50    9.51
   0  -8   4  181.80   12.05
   0  -8  -4  159.80   10.32
   0   8  -4  168.50   11.13
   0   8   6   -0.81    3.49
   0  -8   6    0.34    4.33
   0  -8  -6    0.45    2.80
   0   8  -6    1.11    3.87
   0   8   8  231.70   14.34
   0  -8   8  230.30   14.57
   0  -8  -8  243.00   15.25
   0   8  -8  230.90   14.61
   0   8  10    0.59    3.48
   0  -8  10    2.62    3.83
   0  -8 -10    4.33    3.42
   0   8 -10    0.47    3.33
   0   8  12  899.20   52.72
   0  -8  12  906.50   53.31
   0  -8 -12  941.00   55.14
   0   8 -12  935.10   54.84
   0   8  14    3.87    2.72
   0  -8  14    2.22    2.84
   0  -8 -14    1.71    2.75
   0   8 -14   -1.60    3.43
   0  -8  16 2953.00  171.30
   0  -8 -16 3139.00  182.10
   0   8 -16 3134.00  181.80
   0   8  18    0.98    2.56
   0  -8  18    1.82    2.46
   0  -8 -18    0.04    2.53
   0   8 -18   -0.80    2.76
   0   8  20  866.80   50.75
   0  -8  20  833.50   48.87
   0  -8 -20  697.40   40.96
   0   8 -20  825.20   48.35
   0   8  22    1.03    2.17
   0  -8  22    0.13    2.29
   0  -8 -22   -3.33    2.21
   0   8 -22   -0.66    2.52
   0   8  24   37.46    3.30
   0  -8  24   32.25    3.34
   0  -8 -24   31.81    3.26
   0   8 -24   37.37    3.67
   0   8  26   -0.71    1.73
   0  -8  26   -0.29    2.12
   0  -8 -26   -0.91    1.95
   0   8 -26    1.04    2.23
   0   8  28  577.50   34.02
   0  -8  28  617.20   36.31
   0  -8  28  636.00   37.47
   0   8  30   -0.03    2.05
   0  -8  30    2.15    2.24
   0  -8  30    1.59    2.06
   0  -8 -30    0.00    1.89
   0   8  32  127.20    8.10
   0  -8  32  112.70    7.40
   0  -8  32  146.50    9.18
   0   8  34    1.02    1.45
   0  -8  34    2.87    1.82
   0  -8  34   -1.55    1.74
   0  -8 -34   -0.70    1.63
   0   8  36  101.60    6.34
   0  -8  36   96.39    6.33
   0  -8  36  116.60    7.41
   0   8  38    0.43    1.26
   0  -8  38    1.24    1.84
   0  -8  38    1.42    1.81
   0  -8 -38    2.12    1.47
   0   8  40  406.60   24.06
   0   8  40  340.30   20.19
   0  -8  40  413.90   24.47
   0  -8  42    1.03    1.38
   0  -8  42    1.50    1.45
   0  -8  44    4.86    1.38
   0  -8  44    4.14    1.26
   0 -10   0   -0.80    4.22
   0  10   0    3.81    4.95
   0  10   2   31.62    5.72
   0 -10   2   36.99    4.67
   0 -10  -2   41.55    5.40
   0  10  -2   40.92    5.37
   0  10   4    3.67    4.74
   0 -10   4   -2.62    4.51
   0 -10  -4   -3.43    4.18
   0  10  -4   -0.66    3.59
   0  10   6  340.90   21.16
   0 -10   6  283.80   17.73
   0  10  -6  291.90   18.10
   0  10   8   -0.10    3.07
   0 -10   8    0.80    4.37
   0 -10  -8   -3.53    4.21
   0  10  -8    0.06    3.54
   0  10  10    2.05    3.56
   0 -10  10    3.40    4.08
   0 -10 -10    4.05    3.72
   0  10 -10    4.33    4.08
   0  10  12   -0.85    3.11
   0 -10  12    1.39    3.63
   0 -10 -12   -4.95    3.39
   0  10 -12    4.12    3.19
   0  10  14   48.13    4.69
   0 -10  14   36.00    4.29
   0 -10 -14   45.89    4.56
   0  10 -14   41.83    4.49
   0  10  16    1.61    2.86
   0 -10  16   -3.61    2.78
   0 -10 -16   -0.28    2.85
   0  10 -16   -0.67    3.50
   0  10  18  200.30   12.67
   0 -10  18  202.10   12.69
   0 -10 -18  191.30   12.16
   0  10 -18  192.40   12.21
   0  10  20   -0.60    2.71
   0 -10  20    1.25    2.56
   0 -10 -20   -0.95    2.38
   0  10 -20    1.44    2.72
   0  10  22  571.70   33.73
   0 -10  22  544.70   32.27
   0  10 -22  571.80   33.83
   0  10  24    0.32    2.27
   0 -10  24   -2.38    2.47
   0 -10 -24   -3.68    2.30
   0  10 -24    1.43    2.71
   0  10  26   84.37    5.83
   0 -10  26   85.81    6.12
   0 -10 -26   88.69    6.18
   0  10 -26  107.60    7.34
   0  10  28   -2.17    2.21
   0 -10  28    1.03    2.41
   0 -10 -28   -1.02    2.01
   0  10 -28   -2.58    2.50
   0  10  30   33.37    3.36
   0 -10  30   34.42    3.42
   0 -10 -30   40.66    3.52
   0  10  32   -0.35    1.82
   0 -10  32   -0.05    2.04
   0 -10  32    2.66    2.44
   0 -10 -32    1.90    2.06
   0  10  34   18.65    2.17
   0 -10  34   20.54    2.72
   0 -10  34   22.31    2.84
   0 -10 -34   18.90    2.47
   0  10  36    1.38    1.54
   0 -10  36    0.10    2.10
   0 -10  36    3.33    2.03
   0 -10 -36   -4.61    1.91
   0  10  38   58.15    4.13
   0 -10  38   63.57    4.75
   0 -10  38   64.80    4.86
   0 -10 -38   69.20    4.79
   0  10  40   -0.34    1.51
   0 -10  40    2.02    1.94
   0 -10  40   -1.69    1.97
   0 -10 -40    0.66    1.51
   0  10  42  229.90   13.67
   0 -10  42  237.60   14.29
   0 -10  42  231.50   13.98
   0 -10 -42  241.90   14.44
   0 -10  44    0.09    1.69
   0 -10  44   -2.15    1.70
   0 -10  46   -0.12    1.43
   0 -10  46   -1.92    1.47
   0  12   2   -1.92    4.79
   0 -12   2   -2.85    4.98
   0 -12  -2   -1.65    5.04
   0  12  -2   -1.87    3.51
   0  12   4 2473.00  144.00
   0 -12   4 2394.00  139.40
   0 -12  -4 2310.00  134.50
   0  12  -4 2341.00  136.30
   0  12   6    4.49    4.75
   0 -12   6    4.78    4.27
   0 -12  -6   -2.75    4.43
   0  12  -6   -1.74    4.44
   0 -12   8  607.70   36.28
   0 -12  -8  654.20   38.96
   0  12  -8  577.80   34.59
   0  12  10   -1.85    4.14
   0 -12  10    0.11    3.02
   0 -12 -10    0.87    3.62
   0  12 -10   -2.53    3.90
   0  12  12   85.37    6.95
   0 -12  12   73.05    6.47
   0 -12 -12   74.05    6.22
   0  12 -12   79.53    6.63
   0  12  14    1.91    2.92
   0 -12  14    4.97    3.49
   0 -12 -14   -4.28    3.24
   0  12 -14    4.41    3.52
   0  12  16 1737.00  101.20
   0 -12  16 1632.00   95.26
   0 -12 -16 1836.00  106.90
   0  12 -16 1583.00   92.32
   0  12  18    6.50    2.95
   0 -12  18    0.23    3.26
   0 -12 -18   -0.26    2.92
   0  12 -18    0.59    3.00
   0  12  20   68.71    5.49
   0 -12  20   69.69    5.59
   0 -12 -20   69.11    5.67
   0  12 -20   80.63    6.30
   0  12  22   -1.28    2.42
   0 -12  22    4.50    2.85
   0 -12 -22    0.01    2.70
   0  12 -22   -2.89    2.77
   0 -12  24  608.90   36.11
   0  12 -24  588.50   34.88
   0  12  26   -0.50    2.67
   0 -12  26   -0.68    2.61
   0 -12 -26    3.95    2.49
   0  12 -26   -1.12    2.73
   0  12  28  231.10   14.31
   0 -12  28  257.30   15.81
   0 -12 -28  224.30   13.92
   0  12 -28  229.80   14.35
   0  12  30    1.39    2.36
   0 -12  30    2.05    2.55
   0 -12 -30   -3.38    2.27
   0  12 -30   -0.58    2.32
   0  12  32   92.85    6.29
   0 -12  32   96.42    6.85
   0 -12 -32   92.65    6.35
   0  12 -32   95.30    6.75
   0  12  34   -1.29    2.00
   0 -12  34    1.00    2.45
   0 -12  34   -0.66    2.29
   0 -12 -34    2.02    2.25
   0  12  36  184.70   11.52
   0 -12  36  195.60   12.24
   0 -12  36  205.60   12.78
   0 -12 -36  200.50   12.32
   0  12  38   -0.76    1.96
   0 -12  38    1.32    2.19
   0 -12  38    0.36    2.38
   0 -12 -38    2.94    2.11
   0  12  40 1206.00   70.30
   0 -12  40 1225.00   71.56
   0 -12  40 1124.00   65.62
   0 -12 -40 1350.00   78.63
   0  12  42    0.51    1.72
   0 -12  42    1.91    2.02
   0 -12  42   -3.48    2.11
   0 -12 -42    0.48    1.87
   0  12  44  253.80   15.20
   0 -12  44  282.90   17.21
   0 -12 -44  261.90   15.66
   0 -12  46    1.90    2.04
   0 -12  46    0.65    2.00
   0 -12  48  396.00   23.44
   0 -12  48  454.70   26.84
   0 -14   0   -4.57    4.70
   0  14   0    0.43    3.26
   0  14   2  374.20   23.03
   0 -14   2  349.10   21.71
   0 -14  -2  349.50   21.73
   0  14  -2  391.40   24.07
   0  14   4   -2.35    4.22
   0 -14   4    3.42    3.99
   0 -14  -4   -0.12    4.65
   0  14  -4   -3.85    4.95
   0  14   6    0.83    4.50
   0 -14   6    2.38    3.28
   0 -14  -6    1.78    4.35
   0  14  -6    2.05    4.08
   0  14   8   -8.00    4.37
   0 -14   8    0.67    3.06
   0 -14  -8   -4.82    3.76
   0  14  -8    1.59    3.59
   0  14  10 1659.00   96.88
   0 -14  10 1543.00   90.18
   0 -14 -10 1572.00   91.79
   0  14 -10 1518.00   88.78
   0  14  12   -1.03    2.50
   0 -14  12    6.20    4.25
   0 -14 -12    0.26    3.23
   0  14 -12    2.09    3.81
   0  14  14 1859.00  108.20
   0 -14  14 1530.00   89.35
   0 -14 -14 1750.00  102.00
   0  14 -14 1540.00   89.93
   0  14  16   -1.49    3.18
   0 -14  16   -0.92    3.27
   0 -14 -16    6.37    3.82
   0  14 -16    0.81    3.45
   0  14  18 1649.00   96.17
   0 -14  18 1849.00  107.80
   0 -14 -18 1652.00   96.32
   0  14 -18 1817.00  105.90
   0  14  20    3.95    3.11
   0 -14  20    0.85    3.04
   0 -14 -20   -3.71    2.98
   0  14 -20    1.77    3.54
   0  14  22  777.00   45.77
   0 -14  22  694.80   41.17
   0 -14 -22  718.10   42.38
   0  14 -22  731.60   43.30
   0  14  24    1.21    2.90
   0 -14  24   -5.68    2.84
   0 -14 -24    1.78    2.86
   0  14 -24   -1.88    3.05
   0  14  26  907.80   53.49
   0 -14  26 1101.00   64.70
   0 -14 -26 1060.00   62.08
   0  14 -26 1148.00   67.23
   0  14  28    1.68    2.76
   0 -14  28   -3.37    2.85
   0 -14 -28    2.10    2.81
   0  14 -28   -1.76    2.93
   0  14  30  547.10   32.46
   0 -14  30  589.70   34.95
   0 -14 -30  522.40   31.09
   0  14 -30  557.40   33.15
   0  14  32   -1.77    2.19
   0 -14  32   -1.44    2.58
   0 -14 -32    1.46    2.39
   0  14 -32    4.04    2.77
   0  14  34    5.25    2.21
   0 -14  34    7.80    2.88
   0 -14 -34    8.29    2.44
   0  14 -34    5.17    2.80
   0  14  36   -2.32    2.32
   0 -14  36    0.70    2.86
   0 -14  36   -0.83    2.40
   0 -14 -36    2.26    2.40
   0  14  38   14.38    2.70
   0 -14  38   10.35    2.92
   0 -14  38    9.46    2.63
   0 -14 -38    9.04    2.59
   0  14  40   -1.16    1.99
   0 -14  40    0.40    2.30
   0 -14  40    1.31    2.72
   0 -14 -40   -0.31    2.21
   0  14  42   47.41    3.84
   0 -14  42   49.31    4.19
   0 -14  42   48.13    4.31
   0 -14 -42   38.04    3.43
   0  14  44   -1.34    1.95
   0 -14  44   -1.53    2.18
   0 -14  44   -1.56    2.34
   0 -14 -44    2.46    2.01
   0  14  46    1.06    1.57
   0 -14  46    2.67    2.18
   0 -14  46   -1.28    2.51
   0 -14 -46   -0.25    1.77
   0 -14  48   -1.35    2.12
   0 -14  48   -0.86    2.14
   0 -14  50   22.08    2.54
   0 -14  50   19.26    2.65
   0 -14  52    1.26    1.49
   0 -14  52    2.56    1.77
   0 -16   0 2235.00  130.20
   0  16   0 2387.00  139.00
   0  16   2    1.57    4.53
   0 -16   2    2.70    3.30
   0 -16  -2   -1.27    3.15
   0  16  -2    4.37    4.70
   0  16   4  237.80   15.30
   0 -16   4  256.10   16.59
   0  16  -4  241.90   15.62
   0  16   6    1.63    3.77
   0 -16   6   -0.80    4.57
   0 -16  -6   -0.01    3.00
   0  16  -6   -2.17    3.87
   0  16   8  991.00   58.49
   0 -16   8  975.00   57.55
   0 -16  -8 1038.00   61.08
   0  16  -8 1006.00   59.36
   0  16  10   -0.09    4.07
   0 -16  10    0.19    3.03
   0 -16 -10    1.09    4.02
   0  16 -10    2.25    4.29
   0  16  12  113.10    7.96
   0 -16  12  119.00    9.00
   0 -16 -12  119.00    8.48
   0  16 -12  112.70    8.58
   0  16  14    5.19    3.75
   0 -16  14   -0.74    2.73
   0 -16 -14    3.83    3.13
   0  16 -14    1.77    3.65
   0  16  16  797.20   47.24
   0 -16  16  935.20   55.05
   0 -16 -16  915.90   53.93
   0  16 -16  955.30   56.30
   0  16  18    1.98    3.53
   0 -16  18    1.63    3.44
   0 -16 -18    0.44    2.88
   0  16 -18   -4.97    3.39
   0  16  20  406.90   24.68
   0 -16  20  369.60   22.61
   0 -16 -20  356.60   21.76
   0  16 -20  386.20   23.76
   0  16  22   -0.87    2.92
   0 -16  22    0.22    3.30
   0 -16 -22   -2.10    3.08
   0  16 -22    3.67    3.43
   0  16  24  219.40   14.18
   0 -16  24  205.80   13.20
   0 -16 -24  217.40   13.86
   0  16 -24  228.60   14.53
   0  16  26    4.72    3.20
   0 -16  26    0.72    3.07
   0 -16 -26    1.78    3.12
   0  16 -26    3.32    3.25
   0  16  28  693.10   41.05
   0 -16  28  622.60   37.10
   0 -16 -28  731.50   43.24
   0  16 -28  648.00   38.48
   0  16  30    1.19    2.50
   0 -16  30    5.68    2.91
   0 -16 -30   -1.31    2.88
   0  16 -30    4.50    2.73
   0  16  32  729.30   42.87
   0 -16  32  736.30   43.47
   0 -16 -32  672.10   39.73
   0  16 -32  716.50   42.42
   0  16  34    0.21    2.35
   0 -16  34    1.48    2.46
   0 -16 -34   -2.88    2.68
   0  16 -34    2.08    2.90
   0  16  36  213.00   13.52
   0 -16  36  224.80   14.18
   0 -16 -36  201.00   12.70
   0  16 -36  228.80   14.36
   0  16  38   -1.24    2.46
   0 -16  38    5.26    2.74
   0 -16  38   -0.45    2.54
   0 -16 -38   -0.56    2.55
   0  16  40  446.40   26.65
   0 -16  40  489.00   29.04
   0 -16  40  455.90   27.45
   0 -16 -40  439.40   26.20
   0  16  42    6.18    2.51
   0 -16  42   -0.62    2.78
   0 -16  42    2.04    2.52
   0 -16 -42    1.81    2.44
   0  16  44   42.89    3.90
   0 -16  44   54.28    4.58
   0 -16  44   53.48    4.39
   0  16  46    1.47    2.09
   0 -16  46    4.65    2.66
   0 -16  46   -6.07    2.39
   0 -16 -46   -2.78    1.87
   0  16  48   28.16    2.87
   0 -16  48   24.30    3.07
   0 -16  48   25.09    3.32
   0 -16 -48   34.71    3.13
   0 -16  50    1.63    2.38
   0 -16  50   -0.99    2.45
   0 -16  52   80.61    5.70
   0 -16  52   87.68    6.04
   0 -16  54    1.40    2.03
   0 -16  54   -0.22    1.69
   0 -18   0    0.10    4.56
   0  18   0    1.84    3.42
   0  18   2    8.11    4.23
   0 -18   2    6.69    4.16
   0 -18  -2   -0.85    3.10
   0  18  -2    0.67    4.85
   0  18   4   -0.38    4.23
   0 -18   4   -0.56    3.20
   0 -18  -4    3.44    4.20
   0  18  -4    1.86    3.25
   0  18   6   -0.47    4.32
   0 -18   6    2.29    3.22
   0 -18  -6   -4.25    4.37
   0  18  -6   -3.08    4.45
   0  18   8    2.63    3.09
   0 -18   8    5.02    4.31
   0 -18  -8    4.03    4.26
   0  18  -8   -3.53    4.48
   0  18  10  102.90    7.95
   0 -18  10  106.40    8.37
   0 -18 -10   88.44    7.33
   0  18 -10   91.74    7.55
   0  18  12    1.13    3.57
   0 -18  12    0.09    3.63
   0 -18 -12    0.73    2.65
   0  18 -12    0.68    4.06
   0  18  14  167.30   11.43
   0 -18  14  154.10   10.76
   0 -18 -14  169.20   11.46
   0  18 -14  168.70   11.43
   0  18  16   -0.40    3.69
   0 -18  16   -6.34    3.88
   0 -18 -16   -0.48    3.62
   0  18 -16   -3.11    3.09
   0  18  18  221.40   14.23
   0 -18  18  213.10   13.92
   0 -18 -18  212.70   13.80
   0  18 -18  222.10   14.33
   0  18  20    2.61    3.21
   0 -18  20    2.15    3.75
   0 -18 -20   -1.62    3.40
   0  18 -20    3.65    3.18
   0  18  22   70.22    5.82
   0 -18  22   65.52    5.72
   0 -18 -22   62.23    5.54
   0  18 -22   56.25    5.53
   0  18  24    2.69    3.22
   0 -18  24    2.31    3.46
   0 -18 -24   -1.76    2.99
   0  18 -24    0.39    3.52
   0  18  26 2243.00  130.60
   0 -18  26 2214.00  128.90
   0 -18 -26 1977.00  115.20
   0  18 -26 2184.00  127.30
   0  18  28    0.79    2.60
   0 -18  28    0.12    2.80
   0 -18 -28    0.56    3.01
   0  18 -28    1.97    3.13
   0  18  30 1986.00  115.50
   0 -18  30 1941.00  113.10
   0  18 -30 1994.00  116.30
   0  18  32    0.49    2.60
   0 -18  32    0.36    2.83
   0 -18 -32   -3.49    2.98
   0  18 -32    0.82    3.08
   0  18  34  131.00    9.21
   0 -18  34  132.50    9.11
   0 -18 -34  124.70    8.51
   0  18 -34  141.20    9.55
   0  18  36   -0.75    2.76
   0 -18  36   -3.42    3.00
   0 -18 -36    1.12    2.89
   0  18 -36   -1.34    3.15
   0  18  38  337.40   20.40
   0 -18  38  354.40   21.57
   0 -18 -38  302.00   18.50
   0  18 -38  343.10   20.90
   0  18  40    0.30    2.62
   0 -18  40    2.22    2.82
   0 -18  40   -0.11    2.95
   0 -18 -40    0.76    2.60
   0  18  42  799.30   46.99
   0 -18  42  736.60   43.60
   0 -18  42  792.90   46.83
   0 -18 -42  650.30   38.43
   0  18  44    2.11    2.32
   0 -18  44    4.18    2.72
   0 -18  44   -2.00    2.71
   0 -18 -44    2.32    2.54
   0  18  46   23.17    3.26
   0 -18  46   20.79    3.32
   0 -18  46   21.87    3.42
   0 -18 -46   17.38    2.78
   0  18  48   -2.03    2.33
   0 -18  48    0.84    2.65
   0 -18  48    3.03    2.59
   0 -18 -48   -0.08    1.98
   0  18  50  126.20    8.03
   0 -18  50  130.90    8.61
   0 -18  50  125.20    8.56
   0 -18 -50  130.50    8.25
   0 -18  52   -1.79    2.62
   0 -18  52   -0.58    2.75
   0 -18  54   88.84    6.25
   0 -18  54   93.85    6.47
   0 -18  56    0.91    1.95
   0 -18  56   -0.02    1.79
   0 -20   0 7197.00  417.00
   0  20   2    1.15    3.04
   0 -20   2    5.11    4.49
   0 -20  -2    5.02    3.33
   0  20  -2    4.89    4.54
   0  20   4 2345.00  136.60
   0 -20   4 2517.00  146.60
   0 -20  -4 2419.00  141.00
   0  20  -4 2279.00  132.80
   0  20   6   -0.67    3.15
   0 -20   6    0.89    4.39
   0 -20  -6   -1.12    3.15
   0  20  -6    1.59    4.09
   0  20   8 2212.00  128.90
   0 -20   8 2409.00  140.40
   0 -20  -8 2258.00  131.60
   0  20  -8 2548.00  148.40
   0  20  10    4.42    3.61
   0 -20  10   -1.93    3.63
   0 -20 -10   -3.15    3.78
   0  20 -10    5.60    4.16
   0  20  12 1348.00   79.03
   0 -20  12 1411.00   82.72
   0 -20 -12 1341.00   78.57
   0  20 -12 1361.00   79.86
   0  20  14    2.02    3.52
   0 -20  14   -7.48    4.06
   0 -20 -14   -2.11    3.51
   0  20 -14    0.68    3.84
   0  20  16  356.60   21.91
   0 -20  16  361.60   22.35
   0 -20 -16  335.20   20.85
   0  20 -16  350.10   21.60
   0  20  18   -1.51    2.54
   0 -20  18   -3.99    3.57
   0 -20 -18   -5.04    3.14
   0  20 -18    2.46    2.68
   0  20  20  511.20   30.63
   0 -20  20  474.10   28.64
   0 -20 -20  550.20   33.02
   0  20 -20  504.30   30.43
   0  20  22   -4.23    3.62
   0 -20  22    1.51    3.71
   0 -20 -22    1.75    3.37
   0  20 -22    1.53    3.85
   0  20  24 1403.00   82.27
   0 -20  24 1195.00   70.29
   0 -20 -24 1255.00   73.59
   0  20 -24 1198.00   70.41
   0  20  26    1.91    3.32
   0 -20  26   -1.41    3.46
   0 -20 -26    2.57    3.14
   0  20 -26    1.74    3.28
   0  20  28  205.90   13.17
   0 -20  28  203.90   13.18
   0 -20 -28  223.30   14.11
   0  20 -28  215.40   13.88
   0  20  30    2.16    2.97
   0 -20  30   -0.83    2.82
   0 -20 -30   -1.58    3.09
   0  20 -30    1.72    3.32
   0  20  32  239.00   15.27
   0 -20  32  249.80   15.73
   0 -20 -32  246.20   15.68
   0  20 -32  238.10   15.25
   0  20  34    1.48    3.40
   0 -20  34   -1.12    2.99
   0 -20 -34   -0.90    3.34
   0  20 -34   -0.39    3.25
   0  20  36  129.60    8.73
   0 -20  36  100.70    7.58
   0 -20 -36  105.60    7.57
   0  20 -36  111.00    8.17
   0  20  38   -0.13    2.89
   0 -20  38   -2.59    3.35
   0 -20 -38    1.38    2.91
   0  20 -38    1.73    2.91
   0  20  40   16.39    3.56
   0 -20  40   25.45    3.80
   0 -20 -40   16.85    3.27
   0  20 -40   22.12    3.65
   0  20  42    0.40    2.67
   0 -20  42   -1.90    2.99
   0 -20  42    0.69    3.11
   0 -20 -42    1.48    2.92
   0  20  44   31.46    3.85
   0 -20  44   26.51    3.59
   0 -20  44   19.37    3.41
   0 -20 -44   30.17    3.66
   0  20  46   -0.65    2.58
   0 -20  46   -2.31    3.13
   0 -20  46    0.22    2.87
   0 -20 -46    1.74    2.62
   0  20  48    3.99    2.74
   0 -20  48    5.43    2.93
   0 -20  48    5.40    3.25
   0 -20 -48    4.46    2.56
   0  20  50   -1.29    2.47
   0 -20  50   -2.21    2.59
   0 -20  50    2.71    3.06
   0 -20 -50    0.45    2.32
   0  20  52   16.02    2.64
   0 -20  52   26.64    3.81
   0 -20  52   25.51    3.35
   0 -20 -52   23.30    2.85
   0 -20  54    0.48    2.92
   0 -20  54   -2.66    3.07
   0 -20  56   74.51    5.66
   0 -20  56   81.22    6.41
   0 -22   0   -4.08    3.89
   0  22   0   -2.02    3.59
   0  22   2  127.70    9.48
   0 -22   2  113.30    8.86
   0 -22  -2  132.00    9.45
   0  22  -2  137.20   10.34
   0  22   4    0.61    4.43
   0 -22   4    3.61    4.14
   0 -22  -4   -3.58    4.43
   0  22  -4    2.45    4.59
   0  22   6   84.14    7.68
   0 -22   6   92.07    7.21
   0 -22  -6   90.20    7.64
   0  22   8   -2.45    3.03
   0 -22   8    0.74    3.92
   0 -22  -8   -0.89    4.37
   0  22  -8    0.20    4.45
   0  22  10   98.94    8.05
   0 -22  10   99.15    8.21
   0 -22 -10   86.20    7.19
   0  22 -10  101.60    7.92
   0  22  12    2.30    3.13
   0 -22  12   -0.82    4.05
   0 -22 -12    0.60    2.83
   0  22 -12    1.85    3.77
   0  22  14  257.70   16.77
   0 -22  14  241.10   15.40
   0 -22 -14  227.50   14.68
   0  22 -14  249.40   16.00
   0  22  16    1.19    4.09
   0 -22  16   -6.69    3.52
   0 -22 -16    1.00    3.68
   0  22 -16   -0.59    3.84
   0  22  18  461.50   28.07
   0 -22  18  477.20   29.02
   0 -22 -18  447.70   27.24
   0  22 -18  511.70   31.02
   0  22  20   -5.78    3.36
   0 -22  20    0.14    3.29
   0 -22 -20   -0.55    3.09
   0  22 -20    0.99    3.50
   0  22  22  659.10   39.39
   0 -22  22  639.00   38.08
   0 -22 -22  707.80   42.13
   0  22 -22  678.00   40.47
   0  22  24    6.20    3.81
   0 -22  24    2.19    3.53
   0 -22 -24    0.73    3.14
   0  22 -24   -3.64    3.59
   0  22  26    2.49    2.96
   0 -22  26    2.22    2.62
   0 -22 -26   -1.02    3.27
   0  22 -26   -0.94    3.66
   0  22  28    0.93    2.85
   0 -22  28    4.39    3.58
   0 -22 -28    0.94    3.36
   0  22 -28   -1.28    3.49
   0  22  30    2.28    3.16
   0 -22  30   14.71    3.86
   0 -22 -30    5.41    3.56
   0  22 -30    5.41    3.54
   0  22  32   -4.11    3.37
   0 -22  32   -0.53    3.41
   0 -22 -32   -0.78    3.29
   0  22 -32    3.11    3.42
   0  22  34  153.70   10.56
   0 -22 -34  155.60   10.70
   0  22  36    3.66    2.96
   0 -22  36   -1.05    3.38
   0 -22 -36    3.80    3.27
   0  22 -36   -4.25    3.29
   0  22  38    1.75    3.43
   0 -22  38    3.62    3.68
   0 -22 -38    5.52    3.15
   0  22 -38   -0.83    3.40
   0  22  40   -0.03    3.21
   0 -22  40    5.34    3.43
   0 -22 -40    4.06    3.12
   0  22 -40    1.69    3.02
   0  22  42   78.64    6.04
   0 -22  42   67.83    5.89
   0 -22 -42   71.93    5.72
   0  22 -42   80.94    6.50
   0  22  44    2.99    2.96
   0 -22  44    3.95    3.00
   0 -22  44   -0.25    3.01
   0 -22 -44   -2.77    2.96
   0  22  46   21.76    3.24
   0 -22  46   17.61    3.37
   0 -22  46   19.77    3.50
   0 -22 -46   20.41    3.39
   0  22  48    2.24    2.72
   0 -22  48   -1.01    2.98
   0 -22  48   -0.65    3.42
   0 -22 -48   -2.50    2.75
   0 -22  50   17.55    3.69
   0 -22  50   22.60    3.68
   0 -22 -50   20.88    3.31
   0  22  52    2.11    2.66
   0 -22  52   -2.00    3.33
   0 -22  52    3.42    2.95
   0 -22 -52    2.24    2.53
   0  22  54    1.67    2.30
   0 -22  54    3.76    3.03
   0 -22  54    4.57    3.49
   0 -22 -54    3.49    2.34
   0 -22  56    9.58    3.66
   0 -22  56    4.54    3.21
   0 -22  58   36.05    4.08
   0 -22  58   33.09    4.11
   0  24   2    2.55    4.39
   0 -24   2   -1.81    3.35
   0 -24  -2    5.37    3.54
   0  24  -2    3.92    4.60
   0 -24   4  118.60    8.78
   0 -24  -4  108.60    8.64
   0  24  -4  132.20    9.88
   0  24   6    3.82    3.18
   0 -24   6   -0.32    3.94
   0 -24  -6   -4.45    4.44
   0  24  -6   -3.54    3.83
   0  24   8  249.70   16.06
   0 -24   8  247.00   16.03
   0 -24  -8  265.90   16.89
   0  24  -8  233.90   15.16
   0  24  10    0.04    3.94
   0 -24  10    2.39    3.15
   0 -24 -10    0.18    4.03
   0  24 -10   -2.18    4.32
   0  24  12 2089.00  122.10
   0 -24  12 2162.00  126.10
   0 -24 -12 2101.00  122.70
   0  24 -12 2181.00  127.30
   0  24  14   -0.44    3.89
   0 -24  14    4.77    4.22
   0 -24 -14   -1.75    3.95
   0  24 -14   -3.25    2.93
   0  24  16   73.67    6.38
   0 -24  16   72.12    6.76
   0 -24 -16   82.30    7.10
   0  24 -16   75.96    6.80
   0  24  18   -0.02    3.10
   0 -24  18    7.29    4.18
   0 -24 -18   -2.02    4.01
   0  24 -18   -3.19    4.07
   0  24  20  478.80   28.99
   0 -24  20  508.80   31.04
   0 -24 -20  501.30   30.45
   0  24 -20  438.20   26.87
   0  24  22   -0.74    3.85
   0 -24  22    3.25    3.93
   0 -24 -22   -2.36    3.17
   0  24 -22    2.58    3.78
   0  24  24 1246.00   73.26
   0 -24  24 1341.00   78.61
   0 -24 -24 1404.00   82.29
   0  24  26   -2.89    3.28
   0 -24  26   -0.13    3.78
   0 -24 -26    0.21    3.05
   0  24 -26    2.05    3.72
   0  24  28    7.70    3.29
   0 -24  28    2.05    2.82
   0 -24 -28    4.11    3.57
   0  24 -28    4.84    3.84
   0  24  30    2.37    3.15
   0 -24  30   -3.05    3.64
   0 -24 -30    1.35    3.43
   0  24 -30    0.62    3.98
   0 -24  32   21.74    4.31
   0 -24 -32   37.90    4.67
   0  24 -32   32.69    4.64
   0  24  34   -1.85    3.29
   0 -24  34   -1.92    3.68
   0 -24 -34   -0.88    3.87
   0  24 -34    6.32    3.69
   0  24  36   63.12    5.52
   0 -24  36   53.17    5.50
   0 -24 -36   50.64    5.21
   0  24 -36   50.47    5.12
   0  24  38    2.77    3.52
   0 -24  38   -2.71    3.14
   0 -24 -38    1.42    3.29
   0  24 -38   -0.05    3.13
   0  24  40   71.36    5.92
   0 -24  40   73.12    6.27
   0 -24 -40   67.29    5.74
   0  24 -40   71.46    6.18
   0  24  42    0.68    3.34
   0 -24  42   -1.82    3.32
   0 -24 -42   -0.16    3.39
   0  24 -42   -1.32    3.13
   0  24  44   79.71    6.45
   0 -24  44   78.06    6.34
   0 -24 -44   64.22    5.53
   0  24 -44   76.32    6.10
   0  24  46   -5.07    2.93
   0 -24  46    0.39    3.30
   0 -24  46    2.52    3.12
   0 -24 -46    4.73    3.10
   0  24  48   11.05    3.27
   0 -24  48   18.79    3.96
   0 -24  48    7.39    3.17
   0 -24 -48   14.97    3.36
   0  24  50   -3.11    3.01
   0 -24  50    1.96    2.95
   0 -24  50    6.54    3.55
   0 -24 -50    3.58    2.90
   0  24  52    4.91    3.18
   0 -24  52   14.61    3.38
   0 -24  52    6.14    3.56
   0 -24 -52    7.18    3.31
   0  24  54    0.86    3.18
   0 -24  54    3.83    3.08
   0 -24  54    3.65    3.50
   0 -24 -54    5.31    3.29
   0  24  56   -0.42    1.91
   0 -24  56    1.32    3.18
   0 -24  56   -0.40    3.67
   0 -24 -56   -0.76    2.09
   0 -24  58   -1.45    3.79
   0 -24  58   -0.46    3.56
   0 -24  60    2.12    3.90
   0 -24  60   -0.08    3.84
   0 -26   0   -2.03    3.14
   0  26   0   -0.65    4.38
   0  26   2   18.71    5.08
   0 -26   2   27.36    4.31
   0 -26  -2   18.92    3.85
   0  26  -2   23.04    5.04
   0  26   4   -7.17    4.40
   0 -26   4   -1.47    4.03
   0 -26  -4   -1.73    3.19
   0  26  -4   -0.33    4.53
   0  26   6  204.00   13.67
   0 -26   6  201.40   13.72
   0 -26  -6  198.10   13.58
   0  26  -6  192.00   13.05
   0  26   8   -5.16    4.56
   0 -26   8    0.59    3.23
   0 -26  -8    3.25    4.21
   0  26  -8   -1.57    3.11
   0  26  10    2.44    3.78
   0 -26  10    8.46    4.61
   0 -26 -10    1.90    4.14
   0  26 -10   -1.99    4.30
   0  26  12    0.68    3.25
   0 -26  12    3.75    3.21
   0 -26 -12   -1.99    3.05
   0  26 -12    1.33    3.89
   0  26  14    5.77    4.48
   0 -26  14   -0.70    3.14
   0 -26 -14    8.26    4.63
   0  26 -14    8.15    4.33
   0  26  16    9.81    4.24
   0 -26  16    5.26    3.83
   0 -26 -16    3.52    4.25
   0  26 -16   -1.56    2.93
   0  26  18  643.60   38.55
   0 -26  18  547.30   33.00
   0 -26 -18  591.30   35.70
   0  26 -18  568.10   34.30
   0  26  20    1.36    3.85
   0 -26  20    0.00    2.84
   0 -26 -20    1.01    3.97
   0  26 -20   -4.00    4.16
   0  26  22  787.70   47.05
   0 -26  22  758.80   45.22
   0 -26 -22  756.10   45.07
   0  26 -22  776.70   46.39
   0  26  24    0.51    4.18
   0 -26  24   -3.60    4.01
   0 -26 -24   -1.71    2.76
   0  26 -24   -1.73    4.19
   0  26  26 1257.00   73.71
   0 -26  26 1293.00   75.95
   0 -26 -26 1337.00   78.56
   0  26 -26 1376.00   80.87
   0  26  28    0.37    3.55
   0 -26  28    4.97    4.04
   0 -26 -28    4.39    3.80
   0  26 -28   -3.67    3.70
   0 -26  30 1241.00   73.04
   0 -26 -30 1248.00   73.42
   0  26 -30 1315.00   77.33
   0  26  32   -4.02    3.52
   0 -26  32    7.99    3.68
   0 -26 -32    4.62    3.88
   0  26 -32    0.50    3.83
   0  26  34  573.10   34.23
   0 -26  34  534.00   32.22
   0 -26 -34  672.40   40.14
   0  26 -34  530.20   31.95
   0  26  36   -0.60    3.42
   0 -26  36   -1.57    3.59
   0 -26 -36   -0.14    3.45
   0  26 -36    2.60    3.31
   0  26  38  168.00   11.38
   0 -26  38  158.30   10.80
   0 -26 -38  161.80   11.00
   0  26 -38  159.80   10.88
   0  26  40   -0.41    3.07
   0 -26  40    0.17    3.55
   0 -26 -40    0.20    3.41
   0  26 -40   -0.34    3.17
   0  26  42  293.40   18.31
   0 -26  42  279.80   17.55
   0 -26 -42  267.30   16.78
   0  26 -42  285.00   17.84
   0  26  44    0.63    3.07
   0 -26  44   -1.69    3.48
   0 -26 -44    3.43    3.25
   0  26 -44   -1.79    3.25
   0  26  46   62.86    5.58
   0 -26  46   64.24    5.69
   0 -26 -46   62.27    5.69
   0  26  48    1.32    3.01
   0 -26  48    3.20    3.40
   0 -26  48    1.01    3.23
   0 -26 -48   -2.72    3.57
   0  26  50   19.37    3.73
   0 -26  50   19.74    3.69
   0 -26  50   22.92    4.44
   0 -26 -50   19.65    3.92
   0  26  52   -0.74    3.58
   0 -26  52    4.81    3.81
   0 -26  52    1.85    3.33
   0 -26 -52   -4.77    3.25
   0  26  54   64.62    5.59
   0 -26  54   73.05    5.92
   0 -26  54   77.29    6.49
   0 -26 -54   69.49    5.92
   0  26  56   -0.86    3.61
   0 -26  56    2.18    3.75
   0 -26  56    2.76    3.26
   0 -26 -56   -1.44    3.57
   0 -26  58   34.15    4.48
   0 -26  58   37.31    5.11
   0 -28   0   17.31    3.98
   0  28   0   10.06    4.63
   0  28   2   -3.48    4.30
   0 -28   2   -0.89    4.20
   0 -28  -2    2.50    3.46
   0  28  -2   -0.34    4.65
   0  28   4  225.80   14.89
   0 -28   4  232.00   15.69
   0 -28  -4  226.60   14.82
   0  28  -4  210.40   14.36
   0  28   6   -2.55    4.75
   0 -28   6   -3.43    3.49
   0 -28  -6   -0.54    4.25
   0  28  -6    3.05    4.45
   0 -28   8  385.70   24.25
   0 -28  -8  355.70   22.35
   0  28  -8  381.00   23.69
   0  28  10   -4.30    4.57
   0 -28  10   -1.85    3.67
   0 -28 -10   -1.35    3.17
   0  28 -10    0.38    3.11
   0  28  12  306.80   19.71
   0 -28  12  352.60   22.48
   0 -28 -12  336.80   21.27
   0  28 -12  301.50   19.20
   0  28  14   -3.10    3.80
   0 -28  14   -2.65    4.51
   0 -28 -14   -3.33    3.72
   0  28 -14   -5.71    3.93
   0  28  16    8.91    3.21
   0 -28  16    7.85    4.27
   0 -28 -16   11.75    4.45
   0  28 -16    9.36    4.53
   0  28  18   -3.74    3.24
   0 -28  18    7.62    4.04
   0 -28 -18    3.65    4.16
   0  28 -18   -0.09    3.40
   0  28  20  307.80   19.42
   0 -28  20  292.40   18.60
   0 -28 -20  338.90   21.26
   0  28 -20  321.10   20.25
   0  28  22   -1.51    4.27
   0 -28  22    6.43    4.53
   0 -28 -22   -3.23    3.98
   0  28 -22    0.60    4.18
   0  28  24  486.50   29.57
   0 -28  24  504.90   30.92
   0 -28 -24  505.80   30.76
   0  28 -24  486.20   29.73
   0  28  26    3.78    3.63
   0 -28  26   -0.84    3.66
   0 -28 -26    5.97    3.53
   0  28 -26   -3.07    4.15
   0  28  28  169.40   11.39
   0 -28  28  169.50   11.65
   0 -28 -28  186.10   12.59
   0  28 -28  184.30   12.58
   0  28  30   -2.75    3.88
   0 -28  30    4.41    3.99
   0 -28 -30    1.14    4.25
   0  28 -30    4.35    3.95
   0  28  32   80.10    6.93
   0 -28  32   84.84    6.76
   0 -28 -32   98.65    7.79
   0  28 -32   84.39    7.49
   0  28  34    1.74    3.31
   0 -28  34   -1.00    3.32
   0 -28 -34    2.18    3.65
   0  28 -34   -0.73    3.60
   0  28  36  226.20   14.58
   0 -28  36  236.70   15.24
   0 -28 -36  235.30   15.15
   0  28 -36  229.90   14.78
   0  28  38   -0.12    3.45
   0 -28  38    0.53    2.62
   0 -28 -38    6.87    3.65
   0  28 -38    2.09    3.47
   0  28  40   37.23    4.78
   0 -28  40   31.14    4.54
   0 -28 -40   40.60    4.64
   0  28 -40   43.44    4.85
   0  28  42   -2.61    3.00
   0 -28  42    0.66    3.66
   0 -28 -42    0.84    3.61
   0  28 -42   -0.26    3.57
   0  28  44  168.10   11.29
   0 -28  44  138.80    9.62
   0 -28 -44  172.50   11.47
   0  28 -44  151.20   10.35
   0  28  46    0.34    3.29
   0 -28  46    4.21    3.72
   0 -28 -46    0.23    3.33
   0  28 -46    2.19    3.25
   0  28  48  149.20   10.05
   0 -28  48  161.90   10.94
   0 -28  48  146.80   10.36
   0 -28 -48  153.80   10.52
   0  28  50    2.75    3.52
   0 -28  50   -0.89    4.00
   0 -28  50    3.08    3.26
   0 -28 -50    5.07    3.52
   0  28  52    7.34    3.61
   0 -28  52    8.46    3.90
   0 -28  52    3.67    3.83
   0 -28 -52    1.61    3.56
   0  28  54   -3.33    3.47
   0 -28  54    2.25    3.72
   0 -28  54    3.43    4.06
   0 -28 -54   -2.78    4.10
   0  28  56   42.08    4.89
   0 -28  56   39.88    4.80
   0 -28  56   46.65    5.44
   0 -28 -56   49.73    5.18
   0 -30   0    0.06    4.17
   0  30   0   -6.59    4.28
   0  30   2    8.37    3.44
   0 -30   2    6.96    5.04
   0 -30  -2    6.43    3.49
   0  30  -2    2.15    4.56
   0  30   4    2.29    4.58
   0 -30   4   -0.87    4.67
   0 -30  -4   -1.38    3.23
   0  30  -4    1.42    4.59
   0  30   6  206.50   13.99
   0 -30   6  264.60   17.18
   0 -30  -6  201.10   13.67
   0  30  -6  205.20   13.92
   0  30   8    6.46    4.24
   0 -30   8    2.01    4.87
   0 -30  -8    3.71    4.45
   0  30  -8    1.60    4.64
   0  30  10  166.10   11.34
   0 -30  10  158.10   11.37
   0 -30 -10  170.80   11.98
   0  30 -10  151.90   11.08
   0  30  12   -0.20    4.49
   0 -30  12    0.78    3.27
   0 -30 -12   -7.46    4.11
   0  30 -12    1.17    3.23
   0  30  14  305.70   19.59
   0 -30  14  260.40   16.97
   0 -30 -14  252.30   16.50
   0  30 -14  262.30   17.08
   0  30  16   -0.34    4.15
   0 -30  16    4.99    4.41
   0 -30 -16    2.42    4.23
   0  30 -16   -0.80    3.97
   0  30  18  732.20   43.67
   0 -30  18  668.50   40.23
   0 -30 -18  685.10   40.98
   0  30 -18  627.90   37.83
   0  30  20    2.47    4.46
   0 -30  20   -1.96    4.52
   0 -30 -20    0.88    3.83
   0  30 -20    0.37    3.69
   0  30  22   71.56    6.98
   0 -30  22   85.33    7.43
   0 -30 -22   84.47    7.28
   0  30 -22   97.43    8.08
   0  30  24   -5.09    4.03
   0 -30  24   -0.12    3.04
   0 -30 -24   -3.73    3.94
   0  30 -24    3.36    4.20
   0  30  26  362.10   22.37
   0 -30  26  350.20   22.13
   0 -30 -26  305.80   19.25
   0  30 -26  314.50   19.93
   0  30  28   -1.06    3.87
   0 -30  28    0.19    2.99
   0 -30 -28    4.03    3.29
   0  30 -28    0.69    4.04
   0  30  30  241.40   15.69
   0 -30  30  238.60   15.58
   0 -30 -30  287.10   18.23
   0  30 -30  240.50   15.66
   0  30  32   -4.34    3.34
   0 -30  32   -0.96    3.97
   0 -30 -32    0.91    3.54
   0  30 -32   -0.57    4.01
   0  30  34  124.50    9.00
   0 -30  34  118.30    8.65
   0 -30 -34  107.10    8.40
   0  30 -34  116.00    8.76
   0  30  36   -5.00    3.36
   0 -30  36    0.10    2.70
   0 -30 -36   -5.34    3.65
   0  30 -36    3.67    3.70
   0  30  38   21.74    3.90
   0 -30  38   21.18    3.88
   0 -30 -38   27.72    4.51
   0  30 -38   19.72    4.08
   0  30  40    4.58    3.53
   0 -30  40   -1.56    3.62
   0 -30 -40    0.75    3.48
   0  30 -40   -3.35    3.56
   0  30  42   46.77    5.42
   0 -30  42   47.41    5.30
   0 -30 -42   41.89    5.07
   0  30 -42   53.23    5.36
   0  30  44   -0.97    3.61
   0 -30  44    0.17    3.21
   0 -30 -44    0.17    4.02
   0  30 -44   -0.04    3.56
   0  30  46   59.89    5.60
   0 -30  46   59.34    6.09
   0 -30 -46   80.83    6.83
   0  30 -46   60.25    5.77
   0  30  48    0.04    3.65
   0 -30  48    2.86    3.77
   0 -30  48    3.58    3.20
   0 -30 -48    2.95    3.74
   0  30  50    7.03    4.06
   0 -30  50   10.37    3.55
   0 -30  50   10.86    4.21
   0 -30 -50    9.27    3.83
   0  30  52    0.69    3.83
   0 -30  52    4.88    3.81
   0 -30  52   -0.41    3.67
   0 -30 -52   -3.00    3.86
   0  30  54   16.59    4.04
   0 -30  54   28.40    4.69
   0 -30  54   17.34    4.34
   0 -30 -54   17.49    4.86
   0  30  56    2.53    4.39
   0 -30  56    1.33    4.48
   0 -30  56  -11.95    4.16
   0 -32   0    1.86    4.41
   0  32   0    4.47    4.21
   0  32   2   -0.01    3.73
   0 -32   2   -1.79    4.52
   0 -32  -2    4.41    4.15
   0  32  -2   -3.52    4.56
   0  32   4  212.00   14.53
   0 -32   4  217.30   14.32
   0 -32  -4  185.50   12.57
   0  32  -4  221.30   14.97
   0  32   6    4.52    3.32
   0 -32   6    1.74    4.48
   0 -32  -6    1.27    3.24
   0  32  -6   -2.22    4.59
   0  32   8   42.30    5.49
   0 -32   8   46.99    5.24
   0 -32  -8   47.74    5.89
   0  32  -8   58.98    6.59
   0  32  10   10.26    4.39
   0 -32  10    1.28    4.72
   0 -32 -10    3.80    4.74
   0  32 -10   -2.65    4.55
   0  32  12    4.00    3.39
   0 -32  12    1.00    4.19
   0 -32 -12    0.43    3.28
   0  32 -12   -2.69    4.10
   0  32  14    0.51    4.02
   0 -32  14   -3.26    3.35
   0 -32 -14   -3.33    4.36
   0  32 -14   -2.98    3.19
   0  32  16   67.07    6.20
   0 -32  16   80.69    6.94
   0 -32 -16   59.14    6.34
   0  32 -16   76.01    7.40
   0  32  18    1.58    3.65
   0 -32  18   -2.55    3.22
   0 -32 -18   -1.02    5.07
   0  32 -18   -1.88    4.09
   0  32  20    2.26    3.17
   0 -32  20    2.91    3.50
   0 -32 -20    2.48    3.11
   0  32 -20    5.61    4.54
   0  32  22    2.52    4.27
   0 -32  22    1.42    4.26
   0 -32 -22   -2.78    3.60
   0  32 -22   -0.38    3.33
   0  32  24   97.29    8.04
   0 -32 -24  100.50    7.96
   0  32 -24   95.01    7.93
   0  32  26   -1.79    3.27
   0 -32  26    5.14    4.11
   0 -32 -26   -2.06    3.73
   0  32 -26   -2.09    4.30
   0  32  28   37.96    5.29
   0 -32  28   21.73    4.89
   0 -32 -28   29.66    4.65
   0  32 -28   26.01    4.81
   0  32  30    3.00    3.81
   0 -32  30    0.40    3.70
   0 -32 -30   -2.74    3.99
   0  32 -30    4.47    3.93
   0  32  32    3.13    3.01
   0 -32  32    1.51    4.05
   0 -32 -32   -0.57    3.92
   0  32 -32   -1.33    4.05
   0  32  34   -4.44    3.78
   0 -32  34   -2.18    3.68
   0 -32 -34    4.48    4.08
   0  32 -34    1.59    3.88
   0  32  36   18.51    4.06
   0 -32  36   26.09    4.07
   0 -32 -36   23.21    4.43
   0  32 -36   31.09    4.63
   0  32  38    2.68    3.66
   0 -32  38    0.38    3.38
   0 -32 -38   -0.55    3.85
   0  32 -38    3.39    4.16
   0  32  40  317.40   19.77
   0 -32  40  308.50   19.30
   0 -32 -40  333.30   20.69
   0  32 -40  304.60   19.09
   0  32  42   -2.18    3.93
   0 -32  42    1.32    4.04
   0 -32 -42    3.31    3.86
   0  32 -42    8.15    4.06
   0  32  44   94.22    7.28
   0 -32  44   97.88    7.70
   0 -32 -44   86.68    7.44
   0  32 -44   99.56    7.83
   0  32  46    1.25    3.40
   0 -32  46    0.52    3.52
   0 -32 -46    0.82    3.64
   0  32 -46   -1.03    3.50
   0  32  48  169.60   11.48
   0 -32  48  159.90   11.12
   0 -32 -48  193.30   12.90
   0  32 -48  161.30   11.06
   0  32  50   -3.51    4.07
   0 -32  50   -1.20    3.48
   0 -32  50    0.32    4.20
   0 -32 -50    2.63    3.98
   0  32  52  137.80    9.79
   0 -32  52  129.00    9.22
   0 -32  52  138.50    9.81
   0 -32 -52  145.50   10.38
   0  32  54   -0.03    3.75
   0 -32  54    0.15    3.79
   0 -32  54    6.44    4.21
   0 -32 -54    1.09    4.41
   0 -34   0   -4.54    4.77
   0  34   0   -2.10    3.03
   0  34   2   38.54    5.48
   0 -34   2   32.97    5.11
   0 -34  -2   35.45    5.48
   0  34  -2   35.25    5.54
   0  34   4   -5.13    4.35
   0 -34   4   -1.24    3.29
   0 -34  -4   -1.75    3.29
   0  34  -4    2.46    4.89
   0  34   6  164.30   11.58
   0 -34   6  149.30   10.97
   0 -34  -6  150.60   10.60
   0  34  -6  149.20   11.02
   0  34   8    3.35    3.80
   0 -34   8    0.02    3.25
   0 -34  -8    2.02    4.02
   0  34  -8    2.18    4.68
   0  34  10   42.40    5.93
   0 -34  10   41.24    5.01
   0 -34 -10   44.85    6.01
   0  34 -10   30.04    5.64
   0  34  12   10.74    4.78
   0 -34  12   -6.88    4.72
   0 -34 -12   -1.43    4.51
   0  34 -12    1.69    4.48
   0  34  14   61.07    6.32
   0 -34  14   62.00    6.66
   0 -34 -14   52.12    6.01
   0  34 -14   57.60    6.14
   0  34  16    9.68    3.92
   0 -34  16    1.36    4.19
   0 -34 -16   -5.72    4.48
   0  34 -16   -3.41    3.84
   0  34  18   -0.76    3.98
   0 -34  18    1.75    4.15
   0 -34 -18   -0.31    3.60
   0  34 -18    8.79    4.68
   0  34  20    2.43    4.63
   0 -34  20    0.31    4.56
   0 -34 -20   -2.52    4.26
   0  34 -20    2.09    4.09
   0  34  22   95.78    8.36
   0 -34  22   81.92    7.65
   0 -34 -22  107.50    8.36
   0  34 -22   88.63    8.37
   0  34  24   -2.23    3.46
   0 -34  24   -2.28    4.07
   0 -34 -24   -3.18    2.96
   0  34 -24    6.09    3.57
   0  34  26   -0.38    3.94
   0 -34  26   -1.01    3.16
   0 -34 -26   -0.74    3.37
   0  34 -26    8.07    4.32
   0  34  28   -2.67    3.48
   0 -34  28    7.45    4.42
   0 -34 -28    2.88    3.88
   0  34 -28    3.31    4.10
   0  34  30   18.81    4.33
   0 -34  30   12.58    3.37
   0 -34 -30   15.39    4.11
   0  34 -30    8.75    4.25
   0  34  32    0.49    3.90
   0 -34  32    1.24    3.76
   0 -34 -32   -0.67    3.70
   0  34 -32   -3.94    3.80
   0  34  34  188.70   12.46
   0 -34  34  229.60   14.99
   0 -34 -34  221.20   14.48
   0  34 -34  198.80   13.21
   0  34  36    0.11    3.62
   0 -34  36    1.57    3.80
   0 -34 -36   -2.61    4.02
   0  34 -36   -3.80    3.73
   0  34  38    8.41    3.97
   0 -34  38    8.77    3.81
   0 -34 -38   11.18    4.19
   0  34 -38   11.65    3.94
   0  34  40    8.87    3.92
   0 -34  40   -0.38    3.71
   0 -34 -40    3.81    4.31
   0  34 -40   -5.19    3.73
   0  34  42    2.97    3.88
   0 -34  42    7.17    4.05
   0 -34 -42    9.49    4.40
   0  34 -42   13.82    4.04
   0  34  44    2.46    3.89
   0 -34  44   -0.43    3.82
   0 -34 -44    4.91    4.24
   0  34 -44    0.59    3.82
   0  34  46   16.23    4.00
   0 -34  46   18.25    4.38
   0 -34 -46   18.44    4.30
   0  34 -46   23.86    4.34
   0  34  48   -2.29    3.68
   0 -34  48    0.25    3.94
   0 -34 -48    3.03    4.08
   0  34 -48   -2.60    3.77
   0  34  50   13.63    4.50
   0 -34  50   31.12    4.37
   0 -34  50   23.32    4.42
   0 -34 -50   16.84    4.36
   0  34  52   -5.86    4.11
   0 -34  52   -2.48    3.80
   0 -34  52    7.40    4.11
   0 -34 -52   -1.92    4.97
   0 -36   0  296.60   19.02
   0  36   0  310.10   19.45
   0  36   2    5.77    4.62
   0 -36   2   -0.87    3.29
   0 -36  -2    9.70    4.86
   0  36  -2    1.01    4.36
   0  36   4  993.20   58.90
   0 -36   4  976.80   58.04
   0 -36  -4 1107.00   65.46
   0  36  -4 1089.00   64.52
   0  36   6    3.41    4.57
   0 -36   6    6.93    3.67
   0 -36  -6   -2.60    3.38
   0  36  -6    1.58    4.53
   0  36   8  416.60   25.46
   0 -36   8  372.20   23.48
   0 -36  -8  367.60   23.02
   0  36  -8  364.60   22.88
   0  36  10   -3.08    3.98
   0 -36  10   -1.89    3.34
   0 -36 -10   -3.12    4.57
   0  36 -10    3.43    4.58
   0  36  12  228.10   15.35
   0 -36  12  207.60   13.84
   0 -36 -12  192.70   13.34
   0  36 -12  216.40   14.50
   0  36  14   -7.09    4.28
   0 -36  14   -5.15    4.42
   0 -36 -14    0.40    4.27
   0  36 -14    3.31    4.84
   0  36  16   81.52    6.98
   0 -36  16   73.58    7.28
   0 -36 -16   65.48    5.97
   0  36 -16   80.97    7.40
   0  36  18   -1.70    4.12
   0 -36  18    4.05    4.70
   0 -36 -18    1.90    4.29
   0  36 -18    0.15    3.66
   0  36  20    1.38    4.28
   0 -36  20    6.67    4.53
   0 -36 -20    1.83    3.08
   0  36 -20    4.16    4.51
   0  36  22   -2.41    2.91
   0 -36  22   -6.06    4.04
   0 -36 -22   -3.29    4.19
   0  36 -22   -0.26    4.04
   0  36  24  196.40   12.97
   0 -36  24  197.20   13.10
   0 -36 -24  210.40   14.02
   0  36 -24  239.10   15.63
   0  36  26    0.00    4.24
   0 -36  26   -5.99    4.38
   0 -36 -26    4.69    3.49
   0  36 -26    2.07    3.34
   0  36  28   73.97    6.59
   0 -36  28   53.62    5.68
   0 -36 -28   54.28    5.38
   0  36 -28   54.46    5.83
   0  36  30   -2.26    3.28
   0 -36  30    8.81    4.23
   0 -36 -30   -4.63    3.84
   0  36 -30    0.32    4.00
   0  36  32   27.68    4.82
   0 -36  32   28.75    3.85
   0 -36 -32   26.66    4.58
   0  36 -32   33.44    4.82
   0  36  34   -0.12    3.81
   0 -36  34   -0.80    3.73
   0 -36 -34   -3.97    4.03
   0  36 -34    2.35    3.56
   0  36  36    2.63    3.95
   0 -36  36   10.72    4.01
   0 -36 -36    4.93    4.04
   0  36 -36    9.28    3.85
   0  36  38   -2.17    3.87
   0 -36  38   -0.11    4.03
   0 -36 -38    5.70    3.98
   0  36 -38    0.21    3.91
   0  36  40  294.60   18.42
   0 -36  40  271.40   17.12
   0 -36 -40  269.60   17.27
   0  36 -40  246.20   15.73
   0  36  42   -3.96    3.92
   0 -36  42   -4.10    3.95
   0 -36 -42   -7.04    3.88
   0  36 -42    2.45    4.05
   0  36  44   12.60    3.87
   0 -36  44    8.62    4.33
   0 -36 -44    7.15    3.93
   0  36 -44   19.38    4.22
   0  36  46   -0.83    3.98
   0 -36  46    1.99    4.17
   0 -36 -46    2.95    3.80
   0  36 -46    2.14    3.83
   0  36  48   11.52    4.34
   0 -36  48    9.33    4.14
   0 -36 -48    8.15    3.84
   0  36 -48    7.64    3.81
   0  36  50   -4.69    4.31
   0 -36  50    0.85    3.31
   0 -36  50   -0.05    4.19
   0 -36 -50   -0.88    4.40
   0 -38   0    1.17    4.05
   0  38   0   -3.42    4.10
   0  38   2   58.89    6.40
   0 -38   2   40.19    4.85
   0 -38  -2   46.58    6.07
   0  38  -2   60.12    5.85
   0  38   4   -0.93    3.94
   0 -38   4   -5.65    4.72
   0 -38  -4   -0.86    4.15
   0  38  -4   -2.90    4.63
   0  38   6   67.87    6.72
   0 -38   6   59.04    5.84
   0 -38  -6   70.87    6.78
   0  38  -6   59.90    6.46
   0  38   8    0.39    4.25
   0 -38   8    5.34    4.38
   0 -38  -8    3.17    4.20
   0  38  -8   -0.89    4.75
   0  38  10  407.70   25.19
   0 -38  10  411.40   25.63
   0 -38 -10  428.00   26.36
   0  38 -10  444.30   27.49
   0  38  12    1.78    3.43
   0 -38  12    0.75    3.37
   0 -38 -12    4.95    4.37
   0  38 -12    1.89    4.33
   0  38  14  483.70   29.53
   0 -38  14  458.40   28.09
   0 -38 -14  420.20   25.96
   0  38 -14  432.70   26.73
   0  38  16    1.03    3.85
   0 -38  16    3.16    3.46
   0 -38 -16    2.38    4.08
   0  38 -16    1.82    4.56
   0  38  18  737.60   44.04
   0 -38  18  673.40   40.32
   0 -38 -18  677.20   40.53
   0  38 -18  678.00   40.61
   0  38  20    1.67    3.35
   0 -38  20    1.51    3.18
   0 -38 -20   -1.33    4.29
   0  38 -20   -0.90    3.51
   0  38  22  298.70   18.87
   0 -38  22  298.70   18.88
   0 -38 -22  296.20   18.63
   0  38 -22  278.70   17.97
   0  38  24   -0.52    4.09
   0 -38  24   -1.86    4.31
   0 -38 -24    7.87    3.65
   0  38 -24   -2.31    3.73
   0  38  26   94.83    7.46
   0 -38  26   97.14    8.00
   0 -38 -26   96.16    7.81
   0  38 -26   99.77    8.19
   0  38  28   -2.86    3.98
   0 -38  28    1.40    3.08
   0 -38 -28    1.24    3.99
   0  38 -28   -3.53    3.23
   0  38  30  175.60   11.83
   0 -38  30  170.00   11.75
   0 -38 -30  175.90   11.98
   0  38 -30  170.00   11.68
   0  38  32   -2.44    3.57
   0 -38  32    3.33    3.48
   0 -38 -32    0.30    3.94
   0  38 -32    6.50    3.96
   0  38  34   52.99    5.72
   0 -38  34   48.91    5.15
   0 -38 -34   51.63    5.86
   0  38 -34   44.80    5.20
   0  38  36    3.54    4.00
   0 -38  36   -0.62    3.90
   0 -38 -36    1.43    4.15
   0  38 -36    0.43    3.78
   0  38  38   13.25    4.02
   0 -38  38   10.07    3.98
   0 -38 -38   17.03    4.59
   0  38 -38   12.70    3.85
   0  38  40    3.84    3.70
   0 -38  40    2.97    4.04
   0 -38 -40   -2.37    4.04
   0  38 -40    0.90    3.61
   0  38  42   91.43    7.29
   0 -38  42   85.23    7.29
   0 -38 -42   81.41    6.97
   0  38 -42   81.24    6.65
   0  38  44   -0.31    3.59
   0 -38  44   -0.28    4.51
   0 -38 -44   -1.09    3.79
   0  38 -44    5.69    4.05
   0  38  46    8.71    4.25
   0 -38  46   11.20    4.23
   0 -38 -46    9.71    4.55
   0  38 -46   14.73    4.12
   0  38  48   -1.75    4.38
   0 -38  48   -2.78    4.23
   0 -38 -48    2.64    4.61
   0  38 -48    5.57    4.27
   0 -40   0   70.82    6.33
   0  40   0   79.67    7.39
   0  40   2    1.39    3.14
   0 -40   2   -1.30    4.36
   0 -40  -2    5.20    4.78
   0  40  -2    0.31    3.32
   0  40   4  719.20   43.24
   0 -40   4  685.70   41.03
   0 -40  -4  708.20   42.53
   0  40  -4  716.50   42.96
   0  40   6    7.51    3.64
   0 -40   6    2.31    4.44
   0 -40  -6    3.08    4.46
   0  40  -6    4.27    4.36
   0  40   8 1016.00   60.02
   0 -40   8 1043.00   61.63
   0 -40  -8 1156.00   68.24
   0  40  -8 1041.00   61.70
   0  40  10    7.07    4.54
   0 -40  10   -1.73    4.44
   0 -40 -10    4.54    4.29
   0  40 -10    3.12    4.22
   0  40  12  235.30   15.66
   0 -40  12  241.50   16.04
   0 -40 -12  222.50   14.72
   0  40 -12  233.00   15.11
   0  40  14   -0.18    3.74
   0 -40  14    4.78    4.27
   0 -40 -14   13.35    5.27
   0  40 -14    8.08    4.40
   0  40  16  746.40   44.46
   0 -40  16  748.80   44.70
   0 -40 -16  721.00   43.08
   0  40 -16  754.20   45.03
   0  40  18    4.46    4.26
   0 -40  18    1.61    3.98
   0 -40 -18    4.26    3.18
   0  40 -18    0.27    4.36
   0  40  20  427.00   26.41
   0 -40  20  376.30   23.38
   0 -40 -20  434.00   26.62
   0  40 -20  438.40   27.00
   0  40  22    0.09    4.23
   0 -40  22   -3.60    4.50
   0 -40 -22    8.47    3.90
   0  40 -22   -5.81    3.37
   0  40  24  180.80   12.17
   0 -40  24  213.60   14.29
   0 -40 -24  201.20   13.42
   0  40 -24  208.80   13.94
   0  40  26    5.82    4.19
   0 -40  26    2.60    3.16
   0 -40 -26   -1.81    2.96
   0  40 -26   -1.53    3.59
   0  40  28  222.40   14.44
   0 -40  28  251.80   16.23
   0 -40 -28  231.20   15.15
   0  40 -28  249.30   16.06
   0  40  30    0.53    4.10
   0 -40  30   -3.89    2.92
   0 -40 -30   -3.46    3.92
   0  40 -30   -3.37    3.63
   0  40  32  141.50    9.86
   0 -40  32  141.00   10.27
   0 -40 -32  166.40   11.51
   0  40 -32  141.10    9.97
   0  40  34    0.75    3.80
   0 -40  34    2.47    3.01
   0 -40 -34   -0.59    4.09
   0  40 -34   -0.92    3.72
   0  40  36    1.98    3.88
   0 -40  36    1.21    3.85
   0 -40 -36    0.81    4.29
   0  40 -36    4.81    3.71
   0  40  38    1.05    3.59
   0 -40  38    3.36    4.05
   0 -40 -38    0.25    4.56
   0  40 -38   -6.46    3.72
   0  40  40    4.86    3.74
   0 -40  40   -0.06    4.19
   0 -40 -40    4.21    4.11
   0  40 -40    6.57    3.65
   0  40  42    0.51    3.86
   0 -40  42    2.99    4.17
   0 -40 -42   -1.97    3.68
   0  40 -42   -0.71    3.64
   0  40  44   70.18    6.33
   0 -40  44   73.64    6.52
   0 -40 -44   63.51    6.08
   0  40  46    0.24    4.82
   0 -42   0   -5.21    3.96
   0  42   0   -2.37    4.20
   0  42   2   13.41    3.35
   0 -42   2   15.14    4.89
   0 -42  -2   15.53    4.48
   0  42  -2   18.64    4.24
   0  42   4    3.09    4.30
   0 -42   4    1.10    3.10
   0 -42  -4    7.09    4.55
   0  42  -4   -2.54    3.73
   0  42   6   -5.04    4.16
   0 -42   6    3.86    4.27
   0 -42  -6    0.59    4.39
   0  42  -6    1.12    4.01
   0  42   8   -1.60    2.89
   0 -42   8   -5.27    3.72
   0 -42  -8   -4.10    4.28
   0  42  -8   -4.75    4.47
   0  42  10   56.90    5.77
   0 -42  10   61.94    5.70
   0 -42 -10   57.07    6.22
   0  42 -10   55.09    5.86
   0  42  12   -6.81    4.31
   0 -42  12   -1.51    3.82
   0 -42 -12    1.89    3.37
   0  42 -12   -1.94    3.63
   0  42  14   24.83    4.97
   0 -42  14    9.59    4.57
   0 -42 -14   21.01    4.58
   0  42 -14   14.01    4.11
   0  42  16    4.05    3.98
   0 -42  16   -1.89    4.38
   0 -42 -16    7.81    4.35
   0  42 -16   -3.15    3.78
   0  42  18    3.89    4.31
   0 -42  18    3.69    4.45
   0 -42 -18    3.90    4.14
   0  42 -18    7.03    4.62
   0  42  20   -0.20    4.29
   0 -42  20   -1.97    4.39
   0 -42 -20   -3.62    2.94
   0  42 -20    5.60    4.22
   0  42  22   35.59    4.29
   0 -42  22   40.06    5.12
   0 -42 -22   41.95    5.64
   0  42 -22   34.56    4.92
   0  42  24    3.45    3.97
   0 -42  24    3.45    3.17
   0 -42 -24    2.34    3.11
   0  42 -24   -2.13    3.11
   0  42  26   -3.66    3.84
   0 -42  26   -2.68    3.90
   0 -42 -26    5.72    4.27
   0  42 -26   -5.09    4.11
   0  42  28    0.84    3.38
   0 -42  28    1.16    4.10
   0 -42 -28   -2.38    3.68
   0  42 -28    1.54    3.14
   0  42  30   21.24    4.37
   0 -42  30   25.06    3.86
   0 -42 -30   31.21    4.76
   0  42 -30   20.63    4.40
   0  42  32    4.89    4.06
   0 -42  32    4.36    3.77
   0 -42 -32    5.94    3.95
   0  42 -32   -7.09    3.69
   0  42  34   70.47    6.05
   0 -42  34   68.23    6.36
   0 -42 -34   56.52    5.87
   0  42 -34   62.26    6.04
   0  42  36   -0.94    3.58
   0 -42  36    0.31    3.54
   0 -42 -36    2.41    4.07
   0  42 -36    0.36    3.78
   0  42  38   -0.15    3.51
   0 -42  38   -2.31    4.14
   0 -42 -38    2.41    4.20
   0  42 -38    3.51    3.74
   0  42  40   -0.69    3.74
   0 -42  40   -2.25    4.01
   0 -42 -40   -6.48    4.27
   0  42 -40   -3.11    3.63
   0  42  42   41.06    4.70
   0 -42  42   28.92    4.73
   0 -42 -42   24.41    4.90
   0  42 -42   30.03    4.75
   0 -44   0 1279.00   75.15
   0  44   0 1241.00   73.03
   0  44   2    5.25    4.09
   0 -44   2    4.47    4.08
   0 -44  -2    5.00    3.90
   0  44  -2    4.90    4.30
   0  44   4  724.70   43.03
   0 -44   4  649.20   38.90
   0 -44  -4  745.60   44.53
   0  44  -4  614.50   36.65
   0  44   6    1.53    4.40
   0 -44   6   -3.78    2.98
   0 -44  -6    0.53    4.52
   0  44  -6   -1.16    4.42
   0  44   8  674.90   40.34
   0 -44   8  652.50   39.14
   0 -44  -8  646.10   38.75
   0  44  -8  630.00   37.88
   0  44  10   -0.44    2.92
   0 -44  10    6.65    3.99
   0 -44 -10    4.99    3.33
   0  44 -10    3.85    4.02
   0  44  12  472.80   28.59
   0 -44  12  413.60   25.30
   0 -44 -12  463.60   28.18
   0  44 -12  486.70   29.55
   0  44  14   -1.44    3.82
   0 -44  14    2.08    3.09
   0 -44 -14   -2.18    3.93
   0  44 -14    1.06    3.55
   0  44  16   96.87    7.60
   0 -44  16  110.40    8.13
   0 -44 -16   84.36    7.45
   0  44 -16   89.27    7.18
   0  44  18   -3.17    3.71
   0 -44  18    2.09    2.96
   0 -44 -18    4.92    4.24
   0  44 -18    2.69    3.31
   0  44  20   59.62    5.56
   0 -44  20   62.43    5.53
   0 -44 -20   52.17    5.53
   0  44 -20   46.85    5.30
   0  44  22   -3.07    3.84
   0 -44  22   -0.43    3.09
   0 -44 -22   -1.95    3.55
   0  44 -22    5.44    3.93
   0  44  24   75.18    6.82
   0 -44  24   96.73    7.91
   0 -44 -24   95.19    7.85
   0  44 -24  100.00    7.74
   0  44  26    2.65    2.97
   0 -44  26    1.90    4.22
   0 -44 -26   -3.14    3.66
   0  44 -26    1.74    3.49
   0  44  28   -5.09    3.99
   0 -44  28    2.83    3.24
   0 -44 -28   -2.27    3.98
   0  44 -28   -3.99    3.77
   0  44  30    0.60    2.78
   0 -44  30    2.97    4.10
   0 -44 -30   -6.32    4.02
   0  44 -30    0.17    3.03
   0  44  32    7.33    4.02
   0 -44  32    8.43    3.52
   0 -44 -32    3.75    3.87
   0  44 -32   12.80    4.06
   0  44  34   -5.06    3.90
   0 -44  34   -6.38    4.26
   0 -44 -34    3.33    3.75
   0  44 -34    6.54    4.20
   0  44  36    5.49    3.69
   0 -44  36    6.39    4.30
   0 -44 -36    2.67    3.83
   0  44 -36    6.17    3.42
   0  44  38   -2.28    3.29
   0 -44  38    0.46    3.98
   0 -44 -38    5.35    4.36
   0  44 -38   -3.36    3.47
   0  44  40   24.35    4.51
   0 -46   0    3.72    4.35
   0  46   0    0.43    2.91
   0  46   2   28.94    5.07
   0 -46   2   25.08    4.66
   0 -46  -2   22.55    4.36
   0  46  -2   24.29    4.86
   0  46   4    3.16    3.26
   0 -46   4    3.12    4.40
   0 -46  -4    0.80    4.16
   0  46  -4   -2.64    3.47
   0  46   6   -0.92    3.61
   0 -46   6    2.93    3.72
   0 -46  -6    3.85    4.45
   0  46  -6    7.62    4.13
   0  46   8   -7.48    4.39
   0 -46   8   -0.93    3.86
   0 -46  -8    5.00    4.92
   0  46  -8    1.85    4.17
   0  46  10   40.43    5.22
   0 -46  10   24.40    4.92
   0 -46 -10   34.69    4.98
   0  46 -10   33.00    5.31
   0  46  12    1.00    3.12
   0 -46  12    1.30    4.42
   0 -46 -12   -0.79    2.91
   0  46 -12    4.62    3.63
   0  46  14    3.76    3.34
   0 -46  14    8.52    4.36
   0 -46 -14    2.13    2.96
   0  46 -14    4.83    2.95
   0  46  16    1.88    3.30
   0 -46  16   -4.30    3.95
   0 -46 -16    3.18    3.74
   0  46 -16   -2.65    2.80
   0  46  18   33.35    4.60
   0 -46  18   46.63    5.59
   0 -46 -18   45.69    5.47
   0  46  20    2.57    4.06
   0 -46  20    3.53    3.95
   0 -46 -20   -0.62    4.22
   0  46 -20   -7.01    3.31
   0  46  22  111.00    8.53
   0 -46  22  106.40    8.08
   0 -46 -22  101.80    7.65
   0  46 -22   93.22    7.63
   0  46  24    1.14    3.79
   0 -46  24    3.27    4.18
   0 -46 -24    5.06    4.09
   0  46 -24    0.14    3.99
   0  46  26    7.50    3.88
   0 -46  26    3.67    3.05
   0 -46 -26    2.40    3.78
   0  46 -26    6.44    3.65
   0  46  28    2.72    3.77
   0 -46  28    1.80    4.11
   0 -46 -28    1.44    4.08
   0  46 -28   -2.98    3.78
   0  46  30   54.47    5.37
   0 -46  30   50.00    5.69
   0 -46 -30   61.95    6.07
   0  46 -30   61.81    5.83
   0  46  32    3.73    3.49
   0 -46  32    0.67    4.04
   0 -46 -32    5.72    4.14
   0  46 -32    6.00    3.86
   0  46  34  214.70   13.89
   0 -46  34  180.80   11.88
   0 -46 -34  183.90   12.39
   0  46 -34  186.20   12.13
   0  46  36    2.74    3.91
   0 -46  36   -0.15    4.34
   0 -46 -36    0.28    4.83
   0  46 -36   -1.76    3.96
   0 -48   0  511.70   31.00
   0  48   0  490.20   29.45
   0  48   2    2.59    3.69
   0 -48   2   -0.18    4.14
   0 -48  -2   -4.50    4.20
   0  48  -2    1.77    4.18
   0  48   4    6.28    4.25
   0 -48   4   -5.93    4.15
   0 -48  -4    2.53    3.46
   0  48  -4    3.79    4.03
   0  48   6    2.51    2.74
   0 -48   6   -5.33    4.30
   0 -48  -6   -4.14    3.98
   0  48  -6    6.67    3.81
   0  48   8    1.62    3.36
   0 -48   8    5.54    3.57
   0 -48  -8    5.41    4.11
   0  48  -8   -0.03    4.24
   0  48  10    1.42    3.97
   0 -48  10   -1.01    3.86
   0 -48 -10   -4.24    3.81
   0  48 -10   -7.07    3.82
   0  48  12  220.80   14.42
   0 -48  12  209.20   13.72
   0 -48 -12  218.80   14.27
   0  48 -12  225.20   14.49
   0  48  14    4.13    3.88
   0 -48  14    7.19    4.14
   0 -48 -14    1.34    3.04
   0  48 -14   -0.26    2.88
   0  48  16   -0.21    3.98
   0 -48  16    8.77    4.33
   0 -48 -16    5.83    3.88
   0  48 -16    4.11    3.68
   0  48  18   -3.15    3.94
   0 -48  18   -0.47    4.11
   0 -48 -18   -0.04    3.88
   0  48 -18    0.75    3.58
   0  48  20   19.82    4.10
   0 -48  20   19.69    4.48
   0 -48 -20   20.99    4.55
   0  48 -20   14.21    3.40
   0  48  22    3.61    2.83
   0 -48  22   -5.96    3.93
   0 -48 -22   -2.53    3.68
   0  48 -22    4.88    3.59
   0  48  24  128.90    9.08
   0 -48  24  137.00    9.52
   0 -48 -24  127.50    9.05
   0  48 -24  140.80    9.89
   0 -48  26   -5.39    3.85
   0 -48 -26   -9.02    3.98
   0  48 -26   -5.72    3.83
   0  48  28    2.64    3.01
   0 -48  28   -0.59    3.98
   0 -48 -28    0.84    3.87
   0  48 -28    0.55    3.44
   0  48  30   -3.21    3.56
   0 -48  30   -2.13    3.43
   0 -48 -30    6.78    4.01
   0  48 -30    3.79    3.69
   0  48  32   13.73    3.64
   0 -48  32   14.20    4.66
   0  48 -32   10.62    3.97
   0 -50   0   -5.19    3.43
   0  50   0    1.02    4.12
   0  50   2    3.87    2.96
   0 -50   2   12.09    4.33
   0 -50  -2    9.32    4.70
   0  50  -2    5.31    3.73
   0  50   4    0.68    3.54
   0 -50   4   -1.89    3.97
   0 -50  -4    2.04    2.95
   0  50  -4    3.70    4.44
   0  50   6   -3.38    3.67
   0 -50   6  -11.43    4.27
   0 -50  -6    4.39    3.45
   0  50  -6    0.48    2.91
   0  50   8    0.98    2.91
   0 -50   8    7.22    4.33
   0 -50  -8   -1.84    4.04
   0  50  -8    2.57    3.92
   0  50  10   11.40    3.06
   0 -50  10   11.72    3.70
   0 -50 -10    7.66    4.02
   0  50 -10    5.46    4.74
   0  50  12   -0.83    3.36
   0 -50  12   -5.68    3.42
   0 -50 -12    2.28    3.59
   0  50 -12    5.08    3.31
   0  50  14    4.20    3.67
   0 -50  14    5.80    4.00
   0 -50 -14   12.04    3.82
   0  50 -14    0.59    2.84
   0  50  16   -1.10    3.38
   0 -50  16   -2.66    3.96
   0 -50 -16   -2.97    3.50
   0  50 -16   -2.50    3.41
   0  50  18   32.43    4.22
   0 -50  18   20.27    4.47
   0 -50 -18   35.14    4.64
   0  50 -18   39.69    4.57
   0  50  20    3.41    2.72
   0 -50  20   -0.40    3.67
   0 -50 -20   -6.98    3.93
   0  50 -20    1.75    3.42
   0  50  22   13.56    3.72
   0 -50  22   10.08    3.98
   0 -50 -22   10.62    4.16
   0  50 -22   12.34    3.39
   0  50  24    0.07    3.72
   0 -50  24   -1.77    3.77
   0 -50 -24    0.55    2.80
   0  50 -24   -1.24    3.27
   0  50  26    1.52    3.22
   0 -50  26    1.37    4.06
   0 -50 -26   -2.36    4.04
   0  50 -26   -0.25    3.64
   0 -52   0    6.78    2.92
   0  52   0    5.70    3.76
   0  52   2   -2.75    3.22
   0 -52   2    1.48    3.89
   0 -52  -2   -1.84    3.63
   0  52  -2    0.40    3.13
   0  52   4  102.60    7.64
   0 -52   4  103.40    8.07
   0 -52  -4  106.30    7.89
   0  52  -4   86.60    7.08
   0  52   6    2.39    3.65
   0 -52   6    0.22    3.31
   0 -52  -6    0.52    2.63
   0  52  -6    2.90    3.27
   0  52   8   84.75    6.49
   0 -52   8   73.56    6.41
   0 -52  -8   75.78    6.41
   0  52  -8   75.54    6.16
   0  52  10   -5.18    3.20
   0 -52  10    8.35    3.99
   0 -52 -10   -1.57    3.74
   0  52 -10   -7.84    3.92
   0  52  12   23.30    3.70
   0 -52  12   33.61    4.57
   0 -52 -12   37.79    4.63
   0  52 -12   32.04    4.39
   0  52  14   -3.48    2.45
   0 -52  14    3.50    3.48
   0 -52 -14    2.43    3.23
   0  52 -14    5.80    3.18
   0  52  16   10.55    3.31
   0 -52  16   10.91    3.48
   0 -52 -16   16.35    3.57
   0  52 -16   11.80    2.78
   0  52  18   -2.99    3.08
   0 -52  18    3.10    3.24
   0 -52 -18    4.19    3.43
   0  52 -18    0.11    3.17
   0 -52  20   37.92    4.67
   0 -52 -20   45.74    5.10
   0  52 -20   42.59    4.42
   0 -54   0   -2.03    3.82
   0  54   0    3.10    3.18
   0  54   2    8.77    3.78
   0 -54   2   -0.92    2.98
   0 -54  -2   -3.45    2.77
   0  54  -2    1.22    3.70
   0  54   4    2.59    3.24
   0 -54   4   -1.28    4.10
   0 -54  -4   -2.88    3.99
   0  54  -4    3.04    3.05
   0  54   6   43.97    4.57
   0 -54   6   60.32    5.77
   0 -54  -6   49.14    4.43
   0  54  -6   50.36    5.40
   0  54   8   -1.77    3.59
   0 -54   8    6.45    3.59
   0 -54  -8   -1.48    2.99
   0  54  -8    3.54    2.43
   0  54  10   10.22    4.16
   0 -54  10   17.23    4.45
   0  54 -10   16.76    3.98
   1   1  -1 1507.00   87.38
  -1  -1  -1 1711.00   99.18
  -1   1  -1 1408.00   81.62
   1  -1   3  352.80   20.69
  -1   1   3  386.40   22.81
   1   1  -3  337.10   19.94
  -1  -1  -3  386.20   22.61
   1   1   3  365.00   21.41
  -1  -1   3  301.60   18.01
   1  -1  -3  346.70   20.49
  -1   1  -3  362.70   21.26
   1  -1   5  183.00   10.97
   1   1  -5  204.50   12.40
  -1  -1  -5  180.70   10.77
   1   1   5  190.70   11.38
   1  -1  -5  190.00   11.65
  -1   1  -5  172.90   10.32
   1  -1   7  669.10   38.95
  -1   1   7  663.00   38.87
   1   1  -7  661.40   38.73
  -1  -1  -7  669.20   38.91
  -1  -1  -7  694.80   40.40
  -1  -1   7  649.20   38.11
   1  -1  -7  631.10   36.98
  -1   1  -7  717.80   41.72
   1  -1   9  182.60   10.85
  -1   1   9  197.30   12.27
   1   1  -9  189.10   11.79
  -1  -1  -9  179.50   10.62
  -1  -1  -9  191.40   11.31
   1  -1  -9  214.60   13.55
  -1   1  -9  200.60   11.85
   1  -1  13  117.60    7.04
  -1   1  13  106.60    7.38
   1   1 -13  113.50    7.79
  -1  -1  13  120.10    8.21
   1  -1 -13  112.00    7.59
  -1   1 -13  119.80    7.16
  -1   1  17  252.60   15.26
   1   1 -17  229.70   14.10
  -1  -1  17  238.90   14.49
   1  -1 -17  243.40   14.85
  -1   1  19 3000.00  173.90
   1  -1 -19 2777.00  161.10
  -1   1  21  369.00   22.03
  -1  -1  21  403.80   24.03
  -1  -1  21  410.70   24.41
   1  -1 -21  421.90   25.06
  -1   1  23 2979.00  172.80
  -1  -1  23 3145.00  182.40
  -1  -1  23 3172.00  183.90
   1  -1 -23 3377.00  195.80
  -1   1  25    7.10    2.10
  -1  -1  25    9.73    2.35
  -1  -1  25    8.96    2.33
   1  -1 -25   14.42    2.87
  -1   1  27 1596.00   92.73
  -1   1  27 1676.00   97.50
  -1  -1  27 1895.00  110.10
  -1  -1  27 1555.00   90.37
  -1   1  29   72.10    5.10
  -1   1  29   65.34    4.67
  -1  -1  29   72.67    5.17
  -1  -1  29   70.70    5.03
  -1   1  31  574.10   33.83
  -1   1  31  614.70   36.15
  -1  -1  31  622.70   36.64
  -1  -1  31  621.50   36.54
  -1   1  33  170.00   10.55
  -1   1  33  165.60   10.31
  -1  -1  33  156.90    9.86
  -1  -1  33  188.60   11.57
  -1   1  35  156.20    9.57
  -1   1  35  152.40    9.44
  -1  -1  35  154.70    9.62
  -1  -1  35  160.70    9.86
  -1   1  37    8.15    1.77
  -1   1  37   12.03    2.16
  -1  -1  37   15.68    2.49
  -1  -1  37    9.26    1.92
  -1   1  39   16.43    2.12
  -1   1  39   15.51    2.27
  -1  -1  39   17.87    2.45
  -1  -1  39   15.65    2.16
  -1   1  41  192.20   11.59
  -1   1  41  217.90   13.08
  -1  -1  41  186.10   11.30
  -1  -1  41  200.80   12.11
  -1   1  43  234.10   13.97
  -1   1  43  226.30   13.59
  -1  -1  43  220.70   13.18
  -1  -1  43  209.80   12.67
  -1  -1  45  264.10   15.66
  -1  -1  45  253.20   15.08
   1  -3   1  132.60    8.36
  -1   3   1  141.90    8.91
   1   3  -1  136.20    8.71
  -1  -3  -1  132.10    8.39
   1   3   1  146.30    9.15
  -1  -3   1  129.60    8.38
   1  -3  -1  143.00    8.97
  -1   3  -1  151.30    9.47
   1  -3   3  143.50    9.00
  -1   3   3  152.10    9.60
   1   3  -3  153.20    9.77
  -1  -3  -3  166.40   10.24
   1   3   3  161.80   10.07
  -1  -3   3  138.90    8.96
   1  -3  -3  150.90    9.45
  -1   3  -3  158.80    9.84
   1  -3   5   33.84    3.32
  -1   3   5   36.87    4.02
   1   3  -5   34.13    4.05
  -1  -3  -5   38.74    3.33
   1   3   5   31.78    3.35
  -1  -3   5   37.87    3.71
   1  -3  -5   35.68    3.70
  -1   3  -5   36.12    3.28
   1  -3   7  125.20    7.98
  -1   3   7  122.40    8.20
  -1  -3  -7  110.60    6.99
   1   3   7  128.20    8.06
  -1  -3   7  116.40    7.90
   1  -3  -7   95.18    6.74
  -1   3  -7  114.30    7.22
   1  -3   9  418.60   24.64
  -1   3   9  420.30   25.03
  -1  -3  -9  416.10   24.42
   1   3   9  430.50   25.26
  -1  -3   9  420.50   25.07
  -1  -3   9  417.30   24.89
   1  -3  -9  397.90   23.72
  -1   3  -9  396.40   23.31
   1  -3  11   23.43    2.55
  -1   3  11   25.26    3.54
  -1  -3 -11   21.69    2.32
   1   3  11   24.54    2.40
  -1  -3  11   22.19    3.68
  -1  -3  11   24.12    3.77
   1  -3 -11   29.33    3.94
  -1   3 -11   23.84    2.53
   1  -3  13    0.17    1.69
  -1   3  13    1.56    3.05
  -1  -3 -13    2.71    1.44
   1   3  13    1.01    1.54
  -1  -3  13    2.22    3.14
  -1  -3  13   -2.58    2.91
   1  -3 -13    2.27    2.86
  -1   3 -13   -0.05    1.77
   1  -3  15   29.89    2.48
  -1   3  15   25.10    3.15
  -1  -3 -15   29.63    2.24
   1   3  15   29.79    2.26
  -1  -3  15   33.61    4.09
  -1  -3  15   23.87    3.37
   1  -3 -15   33.75    3.56
  -1   3 -15   30.90    2.58
   1  -3  17  108.50    6.65
  -1   3  17  103.50    6.92
  -1  -3 -17  104.10    6.29
   1   3  17   94.80    5.73
  -1  -3  17  104.00    7.13
  -1  -3  17   91.09    6.33
   1  -3 -17   88.42    6.33
  -1   3 -17   92.17    5.75
   1  -3  19   74.24    4.62
  -1   3  19   66.16    4.99
  -1  -3  19   72.59    5.45
  -1  -3  19   72.29    5.34
  -1   3 -19   70.07    4.49
  -1   3  21 2612.00  151.60
  -1  -3  21 2595.00  150.70
  -1  -3  21 2385.00  138.50
   1  -3 -21 2536.00  147.20
   1  -3  23  304.30   17.95
   1  -3  23  300.50   17.72
  -1  -3  23  309.00   18.68
  -1  -3  23  297.30   17.96
   1  -3 -23  324.00   19.45
  -1   3  25   84.83    5.93
  -1  -3  25   58.13    4.47
  -1  -3  25   70.72    5.14
   1  -3 -25   58.29    4.62
  -1   3  27    4.13    1.85
  -1  -3  27    1.19    2.12
  -1  -3  27    3.75    2.08
   1  -3 -27    1.31    2.16
  -1   3  29  408.30   24.22
  -1  -3  29  394.80   23.46
  -1  -3  29  379.40   22.60
   1  -3 -29  386.20   22.96
  -1   3  31  152.30    9.64
  -1  -3  31  123.50    8.03
  -1  -3  31  125.70    8.16
   1  -3 -31  135.20    8.59
  -1   3  33  378.10   22.44
  -1   3  33  382.80   22.75
  -1   3  35   57.72    4.09
  -1   3  35   58.23    4.27
  -1  -3  35   52.97    3.92
  -1  -3  35   58.75    4.32
  -1   3  37  381.60   22.65
  -1   3  37  323.80   19.19
  -1  -3  37  412.30   24.46
  -1  -3  37  387.40   22.96
  -1   3  39   30.08    2.84
  -1   3  39   34.58    3.00
  -1  -3  39   33.82    3.19
  -1  -3  39   29.72    2.98
  -1   3  41   62.87    4.33
  -1   3  41   58.46    4.08
  -1  -3  41   62.49    4.36
  -1  -3  41   64.59    4.60
  -1   3  43  151.30    9.36
  -1   3  43  124.20    7.59
  -1  -3  43  129.20    7.99
  -1  -3  43  136.60    8.52
  -1   3  45   48.53    3.23
  -1   3  45   54.48    3.52
  -1  -3  45   59.14    4.11
  -1  -3  45   56.68    3.89
  -1  -3  47  220.30   13.22
  -1  -3  47  220.30   13.21
   1  -5  -1 2963.00  171.70
   1  -5   3 1145.00   66.75
  -1   5   3 1032.00   60.27
   1   5  -3 1137.00   66.32
  -1  -5  -3 1098.00   63.95
   1   5   3 1125.00   65.57
  -1  -5   3 1063.00   62.02
   1  -5  -3 1145.00   66.76
  -1   5  -3 1030.00   60.08
   1  -5   5 1417.00   82.45
  -1   5   5 1512.00   88.06
   1   5  -5 1370.00   79.81
  -1  -5  -5 1445.00   83.97
   1   5   5 1351.00   78.59
  -1  -5   5 1566.00   91.14
   1  -5  -5 1424.00   82.91
  -1   5  -5 1311.00   76.32
   1  -5   7    2.82    3.30
  -1   5   7    7.22    3.45
   1   5  -7    3.41    3.76
  -1  -5  -7    2.61    2.60
   1   5   7    3.82    2.63
  -1  -5   7    4.59    3.71
   1  -5  -7    6.15    3.40
  -1   5  -7    2.24    3.04
   1  -5   9  985.80   57.57
   1   5  -9 1003.00   58.76
  -1  -5  -9  932.70   54.39
   1   5   9  998.30   58.18
  -1  -5   9  971.30   56.94
   1  -5  -9  920.60   53.87
  -1   5  -9  997.80   58.24
   1  -5  11   87.06    6.03
  -1   5  11   94.38    7.05
   1   5 -11  100.00    7.46
  -1  -5 -11   87.52    6.05
   1   5  11   93.18    6.29
  -1  -5  11   93.42    7.11
   1  -5 -11   71.08    5.72
  -1   5 -11   83.88    5.96
   1  -5  13   26.41    2.95
  -1   5  13   29.86    3.85
   1   5 -13   32.01    4.15
  -1  -5 -13   28.79    2.97
   1   5  13   32.01    3.08
  -1  -5  13   35.02    4.35
   1  -5 -13   33.61    4.32
  -1   5 -13   33.32    3.41
   1  -5  15  382.30   22.59
  -1   5  15  387.60   23.17
  -1  -5 -15  431.90   25.39
   1   5  15  422.20   24.82
  -1  -5  15  409.50   24.56
  -1  -5  15  405.10   24.26
   1  -5 -15  401.50   24.04
  -1   5 -15  397.80   23.53
   1  -5  17   57.54    4.12
  -1   5  17   73.49    5.39
  -1  -5 -17   55.25    3.81
   1   5  17   63.65    4.34
  -1  -5  17   64.98    5.18
  -1  -5  17   70.15    5.44
   1  -5 -17   67.06    5.29
  -1   5 -17   61.62    4.42
   1  -5  19    3.12    1.58
  -1   5  19    7.46    2.66
  -1  -5 -19    1.60    1.44
   1   5  19    2.76    1.39
  -1  -5  19    4.87    2.65
  -1  -5  19    5.85    2.55
   1  -5 -19    0.33    2.54
  -1   5 -19    4.32    1.82
   1  -5  21  663.10   38.71
  -1   5  21  655.50   38.61
  -1  -5 -21  558.30   32.63
   1   5  21  607.80   35.50
  -1  -5  21  598.00   35.27
  -1  -5  21  646.00   38.18
   1  -5 -21  612.40   36.10
  -1   5 -21  614.30   35.92
   1  -5  23    2.04    1.49
  -1   5  23    1.24    2.24
  -1  -5 -23    1.30    1.17
   1   5  23    3.25    1.16
  -1  -5  23    0.69    2.46
  -1  -5  23    0.57    2.69
   1  -5 -23   -0.45    2.51
  -1   5 -23    0.29    1.59
   1  -5  25   26.53    2.34
   1  -5  25   25.66    2.19
  -1   5  25   29.69    2.98
   1   5  25   21.66    1.64
  -1  -5  25   27.40    3.18
  -1  -5  25   21.95    3.05
   1  -5  27  946.80   55.12
   1  -5  27  919.10   53.62
  -1   5  27  919.00   53.68
  -1  -5  27  952.80   55.62
  -1  -5  27 1088.00   63.61
   1  -5 -27  880.10   51.50
   1  -5  29   14.54    1.45
   1  -5  29   17.90    1.60
  -1   5  29   21.58    2.74
  -1  -5  29   15.64    2.46
  -1  -5  29   17.60    2.84
   1  -5 -29   19.37    2.67
   1  -5  31  412.30   24.32
   1  -5  31  417.90   24.66
  -1   5  31  431.30   25.62
  -1  -5  31  421.00   25.09
  -1  -5  31  406.80   24.22
   1  -5 -31  392.70   23.34
  -1   5  33  118.10    7.53
  -1  -5  33  113.20    7.56
  -1  -5  33  125.00    8.01
   1  -5 -33  119.80    7.75
  -1   5  35  135.20    8.44
  -1  -5  35  128.20    8.24
  -1  -5  35  134.90    8.59
   1  -5 -35  138.20    8.77
  -1   5  37   49.75    3.75
  -1  -5  37   49.08    3.85
  -1  -5  37   57.63    4.42
  -1   5  39   28.35    2.96
  -1   5  39   32.27    2.87
  -1  -5  39   24.15    2.99
  -1  -5  39   30.57    3.11
  -1   5  41   57.14    4.09
  -1   5  41   64.41    4.44
  -1  -5  41   76.88    5.29
  -1  -5  41   65.79    4.79
  -1   5  43  157.20    9.68
  -1   5  43  147.20    8.99
  -1  -5  43  150.20    9.35
  -1  -5  43  166.40   10.18
  -1   5  45    0.69    1.25
  -1   5  45    3.90    1.47
  -1  -5  45   -2.68    1.76
  -1  -5  45    0.88    1.72
  -1  -5  47    8.44    1.60
  -1  -5  47    5.78    1.48
   1  -7   1    4.06    3.57
  -1   7   1    6.06    4.14
   1   7  -1   -1.71    3.53
  -1  -7  -1   -0.99    2.76
   1   7   1    3.97    3.72
  -1  -7   1   -5.32    3.70
   1  -7  -1    3.32    3.58
  -1   7  -1   -3.31    2.88
   1  -7   3   50.57    5.31
  -1   7   3   36.10    4.60
   1   7  -3   43.88    4.75
  -1  -7  -3   38.13    4.68
   1   7   3   38.30    4.78
  -1  -7   3   44.28    4.25
   1  -7  -3   50.35    4.70
  -1   7  -3   41.79    5.22
   1  -7   5   44.05    4.75
  -1   7   5   45.77    4.99
   1   7  -5   45.35    5.28
  -1  -7  -5   48.84    5.04
   1   7   5   45.80    4.82
  -1  -7   5   45.50    5.24
   1  -7  -5   49.69    5.40
  -1   7  -5   43.88    5.08
   1  -7   7  107.20    7.63
  -1   7   7   88.03    6.93
   1   7  -7  110.40    8.38
  -1  -7  -7  109.70    7.67
   1   7   7  104.90    7.44
  -1  -7   7  100.50    7.24
   1  -7  -7  109.60    8.05
  -1   7  -7  101.10    7.47
   1  -7   9   24.88    3.81
  -1   7   9   14.21    3.80
   1   7  -9   17.53    4.49
  -1  -7  -9   21.96    3.74
   1   7   9   16.93    3.35
  -1  -7   9   17.58    3.73
   1  -7  -9   23.04    4.43
  -1   7  -9   22.37    3.94
   1  -7  11   35.77    4.23
  -1   7  11   37.84    4.48
   1   7 -11   35.41    4.82
  -1  -7 -11   33.28    3.75
   1   7  11   33.45    3.98
  -1  -7  11   28.16    4.43
   1  -7 -11   32.34    4.40
  -1   7 -11   31.60    4.11
   1  -7  13  125.30    8.36
  -1   7  13  127.00    8.81
   1   7 -13  124.10    8.67
  -1  -7 -13  128.00    8.38
   1   7  13  119.90    7.79
  -1  -7  13  127.30    8.81
   1  -7 -13  138.00    9.41
  -1   7 -13  123.40    8.18
   1  -7  15   37.36    3.77
  -1   7  15   40.15    4.31
   1   7 -15   42.52    4.55
  -1  -7 -15   43.40    3.65
   1   7  15   36.80    3.36
  -1  -7  15   42.39    4.47
   1  -7 -15   41.02    4.23
  -1   7 -15   42.24    3.78
   1  -7  17   17.13    2.74
  -1   7  17   12.93    3.07
   1   7 -17   15.04    3.45
  -1  -7 -17   14.47    2.39
   1   7  17   12.39    2.23
  -1  -7  17   14.13    3.29
   1  -7 -17   13.67    3.10
  -1   7 -17   12.50    2.73
   1  -7  19   -0.65    2.14
  -1   7  19    2.26    2.77
   1   7 -19    1.89    2.83
  -1  -7 -19    0.62    1.83
   1   7  19    1.78    1.86
  -1  -7  19    1.53    2.66
   1  -7 -19    2.71    2.71
  -1   7 -19    3.93    2.09
   1  -7  21   48.29    3.70
  -1   7  21   49.76    4.49
  -1  -7 -21   50.74    3.81
   1   7  21   46.35    3.47
  -1  -7  21   53.56    4.59
  -1  -7  21   54.93    5.07
   1  -7 -21   57.54    4.88
  -1   7 -21   47.90    3.93
   1  -7  23   44.02    3.42
  -1  -7 -23   48.44    3.63
   1   7  23   44.62    3.22
  -1  -7  23   49.46    4.41
  -1  -7  23   39.96    4.02
   1  -7 -23   47.57    4.21
  -1   7 -23   48.26    3.79
   1  -7  25   72.49    4.86
  -1  -7 -25   82.52    5.32
   1   7  25   72.69    4.66
  -1  -7  25   67.17    5.16
  -1  -7  25   66.61    5.05
   1  -7 -25   64.03    5.02
  -1   7 -25   67.95    4.77
   1  -7  27    7.31    1.87
  -1   7  27    7.40    2.50
  -1  -7 -27    6.75    1.50
   1   7  27    4.67    1.33
  -1  -7  27    4.61    2.36
  -1  -7  27    7.67    2.36
   1  -7 -27    7.74    2.46
  -1   7 -27    9.51    1.91
   1  -7  29   57.01    4.08
   1  -7  29   58.47    4.25
  -1   7  29   53.02    4.33
  -1  -7 -29   55.18    3.65
   1   7  29   48.22    3.22
  -1  -7  29   54.17    4.50
  -1  -7  29   61.35    4.67
   1  -7 -29   51.38    4.29
   1  -7  31   88.02    5.67
   1  -7  31   79.27    5.24
  -1   7  31   87.26    6.05
  -1  -7 -31   78.87    4.88
   1   7  31   72.47    4.49
  -1  -7  31   74.75    5.54
  -1  -7  31   82.02    5.81
   1  -7 -31   82.17    5.80
   1  -7  33   42.02    2.99
   1  -7  33   49.25    3.46
  -1   7  33   46.72    3.74
  -1  -7  33   34.77    3.61
  -1  -7  33   41.85    3.79
   1  -7 -33   36.35    3.48
   1  -7  35  224.10   13.31
   1  -7  35  223.30   13.32
  -1  -7  35  199.70   12.50
   1  -7 -35  189.30   11.73
  -1   7  37  154.80    9.71
  -1  -7  37  189.00   11.84
  -1  -7  37  168.70   10.60
   1  -7 -37  200.50   12.29
  -1   7  39  377.30   22.51
  -1  -7  39  243.90   14.89
  -1  -7  39  256.50   15.72
   1  -7 -39  251.30   15.20
  -1   7  41  171.00   10.53
  -1   7  41  176.80   10.85
  -1  -7  41  158.40   10.04
  -1  -7  41  190.10   11.71
  -1   7  43   -0.47    1.73
  -1   7  43    0.54    1.83
  -1  -7  43    0.93    1.85
  -1  -7  43    2.24    2.01
  -1   7  45   42.94    3.31
  -1   7  45   44.48    3.34
  -1  -7  45   41.56    3.49
  -1  -7  45   39.09    3.42
  -1   7  47   54.62    3.62
  -1   7  47   66.68    4.28
  -1  -7  47   59.83    4.23
  -1  -7  47   65.14    4.50
  -1  -7  49  161.30    9.81
  -1  -7  49  157.00    9.51
   1  -9   1  315.80   19.56
  -1   9   1  297.20   18.59
   1   9  -1  322.50   19.98
  -1  -9  -1  306.30   19.01
   1   9   1  314.10   19.56
  -1  -9   1  337.00   20.81
   1  -9  -1  318.50   19.85
  -1   9  -1  327.00   20.23
   1  -9   3 3439.00  199.60
  -1  -9   3 3791.00  219.90
   1  -9   5 1199.00   70.24
  -1   9   5 1193.00   69.87
   1   9  -5 1052.00   61.85
  -1  -9  -5 1206.00   70.61
   1   9   5 1108.00   64.82
  -1  -9   5 1009.00   59.35
   1  -9  -5 1006.00   59.20
  -1   9  -5 1074.00   62.98
   1  -9   7  141.60    9.54
  -1   9   7  161.00   11.20
   1   9  -7  149.80   10.32
  -1  -9  -7  156.80   10.63
   1   9   7  138.20    9.70
  -1  -9   7  143.20   10.13
   1  -9  -7  141.40    9.87
  -1   9  -7  140.60   10.00
   1  -9   9  576.10   34.32
  -1   9   9  613.30   36.72
   1   9  -9  605.60   36.10
  -1  -9  -9  601.10   35.72
   1   9   9  627.20   37.21
  -1  -9   9  606.60   36.09
   1  -9  -9  605.40   36.07
  -1   9  -9  633.40   37.62
   1  -9  11   10.95    3.76
  -1   9  11   12.54    4.22
   1   9 -11    8.67    3.93
  -1  -9 -11   17.79    3.80
   1   9  11   13.52    3.45
  -1  -9  11    9.91    4.01
   1  -9 -11   14.24    4.13
  -1   9 -11    9.54    3.74
   1  -9  13    6.17    3.25
  -1   9  13    7.85    3.65
   1   9 -13   16.07    3.85
  -1  -9 -13    5.29    2.91
   1   9  13    8.15    2.81
  -1  -9  13    3.02    3.41
   1  -9 -13    3.60    3.13
  -1   9 -13    9.48    2.95
   1  -9  15    7.24    2.87
  -1   9  15    8.93    3.33
   1   9 -15    9.68    3.56
  -1  -9 -15    9.33    2.81
   1   9  15    5.71    2.56
  -1  -9  15    8.38    3.33
   1  -9 -15    5.93    3.31
  -1   9 -15    5.82    2.85
   1  -9  17   41.43    3.80
  -1   9  17   43.19    4.35
   1   9 -17   46.38    4.55
  -1  -9 -17   48.59    4.09
   1   9  17   38.52    3.65
  -1  -9  17   41.19    4.51
   1  -9 -17   45.15    4.56
  -1   9 -17   48.31    4.27
   1  -9  19  320.10   19.30
  -1   9  19  329.40   20.00
   1   9 -19  382.30   23.07
   1   9  19  377.90   22.56
  -1  -9  19  351.90   21.34
   1  -9 -19  361.10   21.80
  -1   9 -19  356.80   21.37
   1  -9  21 2204.00  128.10
  -1   9  21 2303.00  133.80
   1   9 -21 2122.00  123.50
  -1  -9 -21 2569.00  149.10
   1   9  21 2070.00  120.20
  -1  -9  21 2193.00  127.50
   1  -9 -21 2142.00  124.50
  -1   9 -21 2091.00  121.50
   1  -9  23  217.00   13.28
  -1   9  23  235.90   14.44
   1   9 -23  235.30   14.64
  -1  -9 -23  245.80   14.86
   1   9  23  217.90   13.19
  -1  -9  23  231.40   14.33
   1  -9 -23  207.90   12.97
  -1   9 -23  235.80   14.42
   1  -9  25    1.96    1.78
  -1   9  25   -2.76    2.05
  -1  -9 -25    1.90    1.93
   1   9  25   -0.25    1.56
  -1  -9  25    0.04    2.94
  -1  -9  25   -0.61    2.67
   1  -9 -25   -1.13    2.56
  -1   9 -25    1.16    2.18
   1  -9  27   22.73    2.65
  -1   9  27   13.61    2.42
  -1  -9 -27   21.02    2.42
   1   9  27   26.54    2.46
  -1  -9  27   19.59    3.25
  -1  -9  27   23.81    3.41
   1  -9 -27   21.46    3.15
  -1   9 -27   26.06    2.86
   1  -9  29  155.90    9.74
  -1   9  29  168.10   10.62
  -1  -9 -29  185.70   11.23
   1   9  29  164.30   10.11
  -1  -9  29  173.60   10.97
  -1  -9  29  169.20   10.99
   1  -9 -29  162.10   10.41
  -1   9 -29  170.30   10.58
   1  -9  31    0.13    1.80
  -1   9  31    3.40    2.26
  -1  -9 -31   -0.55    1.59
   1   9  31    0.29    1.67
  -1  -9  31    0.46    2.50
  -1  -9  31    0.31    2.49
   1  -9 -31   -1.89    2.32
  -1   9 -31   -0.25    1.98
   1  -9  33  596.60   34.97
   1  -9  33  598.60   35.13
  -1   9  33  585.60   34.48
  -1  -9 -33  589.60   34.53
   1   9  33  536.00   31.43
  -1  -9  33  606.10   35.95
  -1  -9  33  563.50   33.31
   1  -9 -33  591.70   34.95
   1  -9  35    6.67    1.61
   1  -9  35    9.44    1.91
  -1   9  35   15.79    2.70
  -1  -9 -35    9.27    1.29
   1   9  35    7.32    1.06
  -1  -9  35    5.41    2.87
  -1  -9  35   10.47    2.55
   1  -9 -35   11.69    2.49
   1  -9  37   40.92    3.04
   1  -9  37   42.10    3.16
  -1   9  37   45.05    3.92
  -1  -9  37   44.44    3.99
  -1  -9  37   44.65    4.13
   1  -9 -37   37.78    3.41
   1  -9  39   51.12    3.51
   1  -9  39   59.17    3.95
  -1   9  39   50.13    4.12
  -1  -9  39   65.37    5.35
  -1  -9  39   49.57    4.18
   1  -9 -39   61.82    4.67
  -1   9  41  117.20    7.49
  -1  -9  41  124.20    8.24
  -1  -9  41  121.80    7.95
   1  -9 -41  115.00    7.54
  -1   9  43    5.69    2.02
  -1  -9  43    7.04    2.38
  -1  -9  43    3.84    2.32
   1  -9 -43    5.77    2.37
  -1   9  45  311.40   18.54
  -1   9  45  317.50   18.91
  -1  -9  45  286.20   17.33
  -1  -9  45  330.00   19.92
  -1   9  47    2.72    1.56
  -1   9  47    4.31    1.44
  -1  -9  47    3.07    2.06
  -1  -9  47    4.63    1.89
  -1  -9  49   -0.05    1.91
  -1  -9  49   -0.42    1.97
  -1  -9  51    0.08    1.49
  -1  -9  51    0.55    1.67
   1 -11   1 2184.00  127.30
  -1  11   1 1779.00  103.80
   1  11  -1 2172.00  126.60
  -1 -11  -1 2209.00  128.70
   1  11   1 2389.00  139.10
  -1 -11   1 2144.00  125.00
   1 -11  -1 2066.00  120.50
  -1  11  -1 2226.00  129.60
   1 -11   3 1692.00   98.84
  -1  11   3 2032.00  118.50
   1  11  -3 1725.00  100.70
  -1 -11  -3 1620.00   94.59
   1  11   3 1719.00  100.40
  -1 -11   3 1644.00   96.18
   1 -11  -3 1680.00   98.16
  -1  11  -3 1614.00   94.37
   1 -11   5 1917.00  111.80
  -1  11   5 1528.00   89.41
   1  11  -5 1902.00  111.00
  -1 -11  -5 1856.00  108.30
   1  11   5 1758.00  102.60
  -1 -11   5 2124.00  123.80
   1 -11  -5 1883.00  109.90
  -1  11  -5 1953.00  113.80
   1 -11   7  425.80   25.97
  -1  11   7  410.20   24.91
   1  11  -7  470.20   28.80
  -1 -11  -7  366.00   22.50
   1  11   7  453.20   27.42
  -1 -11   7  409.90   25.04
   1 -11  -7  416.60   25.26
  -1  11  -7  416.80   25.31
   1 -11   9  443.30   26.85
  -1  11   9  483.20   29.03
   1  11  -9  452.40   27.29
  -1 -11  -9  438.50   26.38
   1  11   9  489.90   29.45
  -1 -11   9  465.80   28.24
   1 -11  -9  476.50   28.70
  -1  11  -9  484.70   29.20
   1 -11  11    7.50    3.88
  -1  11  11    5.60    3.69
   1  11 -11    2.77    3.96
  -1 -11 -11    6.91    3.57
   1  11  11   10.41    3.69
  -1 -11  11    6.63    4.27
   1 -11 -11    7.84    3.54
  -1  11 -11    9.53    3.53
   1 -11  13   16.31    3.59
  -1  11  13   18.93    4.09
   1  11 -13   13.94    3.94
  -1 -11 -13   13.40    3.45
   1  11  13   20.92    3.65
  -1 -11  13   14.25    3.97
   1 -11 -13   19.57    4.00
  -1  11 -13   12.52    3.57
   1 -11  15  421.40   25.36
  -1  11  15  458.80   27.44
   1  11 -15  398.90   24.12
  -1 -11 -15  450.50   26.89
   1  11  15  381.20   22.95
  -1 -11  15  426.90   25.75
   1 -11 -15  394.60   23.88
  -1  11 -15  404.60   24.34
   1 -11  17    1.28    2.85
  -1  11  17    4.35    2.75
   1  11 -17    3.57    3.39
  -1 -11 -17    1.50    2.65
   1  11  17    3.25    2.82
  -1 -11  17    1.73    3.04
   1 -11 -17   -0.09    3.11
  -1  11 -17    1.22    2.96
   1 -11  19  102.90    7.15
  -1  11  19  131.20    8.80
   1  11 -19  119.60    8.49
  -1 -11 -19  107.10    7.32
   1  11  19  105.20    7.31
  -1 -11  19  103.60    7.71
   1 -11 -19  109.20    7.88
  -1  11 -19  112.70    7.82
   1 -11  21  135.60    8.96
  -1  11  21  139.90    9.28
   1  11 -21  151.00   10.14
  -1 -11 -21  153.40   10.02
   1  11  21  149.50    9.55
  -1 -11  21  136.90    9.26
   1 -11 -21  132.70    9.01
  -1  11 -21  126.20    8.39
   1 -11  23   28.18    3.38
  -1  11  23   23.75    3.12
   1  11 -23   35.93    4.04
  -1 -11 -23   32.37    3.37
   1  11  23   30.45    3.12
  -1 -11  23   26.67    3.73
   1 -11 -23   29.30    3.78
  -1  11 -23   27.03    3.47
   1 -11  25   38.57    3.59
  -1  11  25   55.19    4.52
   1  11 -25   38.31    4.03
  -1 -11 -25   45.02    3.86
   1  11  25   43.80    3.62
  -1 -11  25   49.56    4.70
   1 -11 -25   49.93    4.42
  -1  11 -25   45.97    4.33
   1 -11  27   24.37    2.86
  -1  11  27   23.28    3.44
   1  11 -27   21.56    3.16
   1  11  27   22.33    2.80
  -1 -11  27   24.76    3.59
   1 -11 -27   18.68    2.92
  -1  11 -27   20.59    3.12
   1 -11  29  520.70   30.84
  -1  11  29  544.00   32.36
  -1 -11 -29  568.30   33.47
   1  11  29  447.70   26.55
  -1 -11  29  525.30   31.44
  -1 -11  29  499.00   29.80
  -1  11 -29  525.90   31.11
   1  11  31   47.52    3.69
  -1 -11  31   40.08    4.16
  -1 -11  31   45.44    4.28
  -1  11 -31   40.72    3.70
   1 -11  33  500.20   29.58
  -1  11  33  612.40   36.25
  -1 -11 -33  500.40   29.43
   1  11  33  493.70   28.97
  -1 -11  33  485.70   28.95
  -1 -11  33  519.30   30.82
   1 -11 -33  477.00   28.40
  -1  11 -33  502.10   29.73
   1 -11  35    2.31    2.15
   1 -11  35    2.73    2.14
  -1  11  35    0.66    2.12
  -1 -11 -35    0.78    1.67
   1  11  35   -0.33    1.47
  -1 -11  35   -2.48    2.57
  -1 -11  35   -0.34    2.41
   1 -11 -35    0.57    2.40
   1 -11  37   63.48    4.73
   1 -11  37   72.33    5.13
  -1  11  37   62.36    4.96
  -1 -11 -37   81.96    5.33
   1  11  37   58.89    3.96
  -1 -11  37   61.71    5.10
   1 -11  39   22.41    2.50
   1 -11  39   23.23    2.44
  -1  11  39   20.98    2.83
  -1 -11 -39   19.34    1.67
   1  11  39   17.94    1.57
  -1 -11  39   11.63    2.93
  -1 -11  39   20.79    3.13
   1 -11 -39   19.95    2.95
   1 -11  41  363.90   21.51
   1 -11  41  369.30   21.90
  -1  11  41  386.60   22.96
  -1 -11  41  302.60   18.53
  -1 -11  41  334.50   20.16
   1 -11 -41  364.40   21.80
   1 -11  43  291.00   17.29
   1 -11  43  264.80   15.74
  -1 -11  43  304.00   18.39
  -1 -11  43  266.20   16.28
   1 -11 -43  244.10   14.84
  -1  11  45  167.70   10.46
  -1 -11  45  194.70   12.26
  -1 -11  45  160.20   10.26
   1 -11 -45  176.40   10.93
  -1  11  47    7.70    1.90
  -1  11  47    5.46    2.05
  -1 -11  47    5.48    2.21
  -1 -11  47    7.18    2.26
   1 -11 -47   -0.05    2.24
  -1  11  49   36.94    2.92
  -1  11  49   37.01    2.91
  -1 -11  49   36.38    3.33
  -1 -11  49   48.87    3.92
  -1 -11  51   48.26    3.74
  -1 -11  51   52.88    4.07
  -1 -11  53  100.40    6.49
  -1 -11  53  103.70    6.59
   1  13   1 5686.00  329.60
  -1  13  -1 6024.00  349.10
   1 -13   3  127.80    9.63
  -1  13   3  171.30   11.57
   1  13  -3  146.10   10.32
  -1 -13  -3  141.10   10.10
   1  13   3  124.80    9.43
  -1 -13   3  145.30   10.49
   1 -13  -3  154.10   10.74
  -1  13  -3  149.10   10.70
   1 -13   5    5.99    3.33
  -1  13   5    3.40    4.50
   1  13  -5    5.39    3.50
  -1 -13  -5    4.62    4.53
   1  13   5    2.86    3.09
  -1 -13   5    3.15    5.03
   1 -13  -5    9.06    3.94
  -1  13  -5    8.18    3.54
   1 -13   7  198.90   12.84
  -1  13   7  202.60   13.49
   1  13  -7  208.10   13.55
  -1 -13  -7  220.90   14.09
   1  13   7  201.50   12.96
  -1 -13   7  199.60   13.24
   1 -13  -7  202.50   13.42
  -1  13  -7  197.30   13.17
   1 -13   9   -0.45    2.88
  -1  13   9    4.82    4.46
   1  13  -9    5.19    4.28
  -1 -13  -9    4.06    3.72
   1  13   9    3.33    3.28
  -1 -13   9    4.41    4.29
   1 -13  -9    7.54    3.81
  -1  13  -9    5.84    3.71
   1 -13  11   91.57    7.11
   1  13 -11   99.46    7.77
  -1 -13 -11   91.93    6.74
   1  13  11  100.00    7.45
  -1 -13  11   92.29    7.00
   1 -13 -11  102.30    7.95
  -1  13 -11   95.93    7.23
   1 -13  13  108.80    8.09
  -1  13  13  114.20    8.06
   1  13 -13  107.70    7.84
  -1 -13 -13  112.20    8.11
   1  13  13   94.41    6.95
  -1 -13  13  125.20    9.16
   1 -13 -13  104.50    7.95
  -1  13 -13   99.79    7.36
   1 -13  15  337.50   20.71
  -1  13  15  365.50   22.12
   1  13 -15  358.00   21.95
  -1 -13 -15  354.70   21.51
   1  13  15  369.50   22.33
  -1 -13  15  355.80   21.81
   1 -13 -15  353.70   21.63
  -1  13 -15  324.80   19.94
   1 -13  17  420.20   25.35
  -1  13  17  494.00   29.61
   1  13 -17  461.70   27.82
  -1 -13 -17  463.20   27.64
   1  13  17  512.90   30.58
  -1 -13  17  431.80   26.15
   1 -13 -17  473.00   28.45
  -1  13 -17  444.00   26.70
   1 -13  19    7.98    2.93
  -1  13  19   13.39    3.43
   1  13 -19    6.55    3.67
  -1 -13 -19   11.04    2.82
   1  13  19    6.00    2.88
  -1 -13  19   13.06    3.97
   1 -13 -19    5.14    3.19
  -1  13 -19   16.39    3.47
   1 -13  21 1054.00   61.78
  -1  13  21 1018.00   59.78
   1  13 -21  898.60   52.95
   1  13  21 1014.00   59.27
  -1 -13  21  918.80   54.13
   1 -13 -21 1019.00   59.86
  -1  13 -21  952.70   55.92
   1 -13  23   92.42    6.87
   1  13 -23   94.09    7.07
  -1 -13 -23   95.18    6.74
   1  13  23  101.70    6.85
  -1 -13  23   84.34    6.57
   1 -13 -23   88.07    6.66
  -1  13 -23   80.58    6.04
   1 -13  25  437.70   26.17
   1  13 -25  435.50   26.24
  -1 -13 -25  467.40   27.83
   1  13  25  398.50   23.81
  -1 -13  25  407.70   24.61
   1 -13 -25  424.20   25.54
  -1  13 -25  491.40   29.45
   1 -13  27    1.70    2.27
  -1  13  27    0.09    2.90
   1  13 -27    2.01    3.16
  -1 -13 -27    3.96    2.49
   1  13  27    0.62    2.28
  -1 -13  27    2.04    3.23
   1 -13 -27    4.15    2.91
  -1  13 -27   -0.50    2.73
   1 -13  29  846.50   49.68
   1  13 -29  858.10   50.55
   1  13  29  903.80   52.88
  -1 -13  29  846.90   50.01
   1 -13 -29  981.80   57.57
  -1  13 -29  880.60   51.67
   1 -13  31    2.82    2.43
  -1  13  31    2.43    2.52
  -1 -13 -31    5.74    2.36
   1  13  31    2.39    1.84
  -1 -13  31    7.11    2.97
  -1 -13  31    2.48    2.85
   1 -13 -31    5.15    2.86
  -1  13 -31    4.22    2.62
   1 -13  33  555.40   33.00
  -1  13  33  543.50   32.15
  -1 -13 -33  646.50   38.03
   1  13  33  625.70   36.75
  -1 -13  33  542.10   32.21
  -1 -13  33  602.50   35.59
  -1  13 -33  554.70   32.85
   1 -13  35   35.61    3.50
  -1  13  35   39.67    3.80
  -1 -13 -35   38.36    3.37
   1  13  35   39.61    3.43
  -1 -13  35   38.92    4.03
  -1 -13  35   42.90    4.27
   1 -13 -35   37.76    3.80
  -1  13 -35   39.05    3.79
   1 -13  37   57.32    4.59
  -1  13  37   53.03    4.69
  -1 -13 -37   58.31    4.34
   1  13  37   61.17    4.52
  -1 -13  37   58.43    4.95
  -1 -13  37   52.35    4.97
   1 -13 -37   52.00    4.54
   1 -13  39  311.40   18.79
   1 -13  39  293.90   17.65
  -1  13  39  354.80   21.40
  -1 -13 -39  304.80   18.14
   1  13  39  317.60   18.84
  -1 -13  39  305.00   18.72
  -1 -13  39  324.30   19.79
   1 -13 -39  319.60   19.38
   1 -13  41  293.20   17.66
   1 -13  41  268.90   16.14
  -1 -13 -41  260.60   15.54
   1  13  41  249.80   14.84
  -1 -13  41  239.40   15.07
  -1 -13  41  271.60   16.59
   1 -13 -41  265.00   16.20
   1 -13  43   18.81    2.39
   1 -13  43   18.22    2.45
  -1  13  43   18.96    2.99
  -1 -13  43   17.10    3.26
  -1 -13  43   22.05    3.03
   1 -13 -43   20.32    2.87
  -1 -13  45  331.90   20.06
   1 -13 -45  338.50   20.34
   1 -13  47   93.11    5.79
   1 -13  47   83.12    5.23
  -1  13  47   95.56    6.46
  -1 -13  47   98.16    6.85
  -1 -13  47  105.50    7.26
   1 -13 -47   86.99    5.98
  -1  13  49   10.65    2.32
  -1 -13  49   12.72    2.86
  -1 -13  49   17.63    2.78
   1 -13 -49   13.70    2.24
  -1  13  51   18.57    2.17
  -1  13  51   25.26    2.37
  -1 -13  51   24.21    3.13
  -1 -13  51   19.56    2.74
  -1 -13  53  214.80   13.18
  -1 -13  53  226.20   13.79
  -1 -13  55    8.49    1.96
  -1 -13  55    6.93    2.07
   1 -15   1  145.80   10.48
  -1  15   1  164.80   11.50
   1  15  -1  136.40   10.17
  -1 -15  -1  146.60   10.10
   1  15   1  142.10    9.88
  -1 -15   1  150.90   10.78
   1 -15  -1  159.00   10.77
  -1  15  -1  122.70    9.53
   1 -15   3 1859.00  108.50
  -1  15   3 1879.00  109.70
   1  15  -3 1819.00  106.20
  -1 -15  -3 1555.00   91.02
   1  15   3 1759.00  102.70
  -1 -15   3 1941.00  113.20
   1 -15  -3 1987.00  116.00
  -1  15  -3 1804.00  105.40
   1 -15   5  608.30   36.42
  -1  15   5  624.60   37.28
   1  15  -5  648.30   38.81
  -1 -15  -5  615.70   36.80
   1  15   5  634.80   37.93
  -1 -15   5  650.80   38.91
   1 -15  -5  648.60   38.75
  -1  15  -5  697.00   41.62
   1 -15   7   34.23    5.03
  -1  15   7   30.79    4.14
   1  15  -7   26.46    5.34
  -1 -15  -7   35.82    4.27
   1  15   7   40.16    5.19
  -1 -15   7   30.31    4.18
   1 -15  -7   30.71    4.99
  -1  15  -7   37.44    5.66
   1 -15   9 1411.00   82.60
  -1  15   9 1325.00   77.69
   1  15  -9 1320.00   77.50
  -1 -15  -9 1318.00   77.26
   1  15   9 1412.00   82.54
  -1 -15   9 1257.00   73.70
   1 -15  -9 1289.00   75.49
  -1  15  -9 1336.00   78.27
   1 -15  11   72.34    5.89
  -1  15  11   78.04    6.96
   1  15 -11   83.41    7.78
  -1 -15 -11   82.76    6.72
  -1 -15  11   81.09    7.21
   1 -15 -11   86.69    7.15
  -1  15 -11   86.49    7.16
   1 -15  13  102.90    7.86
  -1  15  13  108.80    7.71
   1  15 -13  113.10    8.50
  -1 -15 -13   98.60    7.33
   1  15  13   90.10    6.82
  -1 -15  13  113.00    8.23
   1 -15 -13  114.60    8.28
  -1  15 -13  113.40    8.02
   1 -15  15  344.90   21.24
  -1  15  15  413.00   25.06
   1  15 -15  382.10   23.39
  -1 -15 -15  381.80   23.26
   1  15  15  414.00   25.07
  -1 -15  15  379.70   23.25
   1 -15 -15  336.00   20.68
  -1  15 -15  354.00   21.69
   1 -15  17   53.39    5.29
   1  15 -17   52.36    5.54
  -1 -15 -17   57.86    5.18
   1  15  17   61.42    5.49
  -1 -15  17   57.38    5.49
   1 -15 -17   50.12    5.02
  -1  15 -17   54.28    5.40
   1 -15  19  136.70    9.51
   1  15 -19  143.60    9.82
  -1 -15 -19  116.60    8.20
   1  15  19  130.30    8.89
  -1 -15  19  143.80    9.66
   1 -15 -19  147.10    9.96
  -1  15 -19  145.90    9.96
   1 -15  21  927.80   54.62
  -1  15  21 1025.00   60.22
   1  15 -21  894.40   52.76
  -1 -15 -21  937.70   55.04
   1  15  21  754.70   44.47
  -1 -15  21  889.70   52.49
  -1  15 -21  885.90   52.18
   1 -15  23   73.84    5.93
  -1  15  23   81.31    6.40
   1  15 -23   77.85    6.42
  -1 -15 -23   84.83    6.83
   1  15  23   80.69    6.19
  -1 -15  23   72.81    6.03
   1 -15 -23   75.47    6.24
  -1  15 -23   71.34    5.67
   1 -15  25    4.66    3.12
  -1  15  25    6.76    2.94
   1  15 -25    7.12    3.32
  -1 -15 -25    1.60    2.55
   1  15  25    0.88    2.85
  -1 -15  25    3.68    3.20
   1 -15 -25    7.96    3.44
  -1  15 -25    2.91    3.01
   1 -15  27   80.73    6.28
  -1  15  27   67.61    5.73
   1  15 -27   76.47    6.26
  -1 -15 -27   87.93    6.39
   1  15  27   69.80    5.62
  -1 -15  27   72.22    5.81
   1 -15 -27   67.51    5.52
  -1  15 -27   76.18    5.97
   1 -15  29   71.87    5.57
  -1  15  29   68.41    5.44
   1  15 -29   78.17    6.15
  -1 -15 -29   84.68    6.22
   1  15  29   74.83    5.52
  -1 -15  29   72.24    5.84
  -1  15 -29   75.20    5.77
   1 -15  31    8.75    2.89
  -1  15  31   12.29    2.75
   1  15 -31   14.11    3.21
  -1 -15 -31   10.58    2.80
   1  15  31    9.18    2.61
  -1 -15  31   13.22    3.26
   1 -15 -31   14.51    3.01
  -1  15 -31    9.09    2.92
   1 -15  33  545.90   32.60
  -1  15  33  523.20   31.07
  -1 -15 -33  533.40   31.64
   1  15  33  518.80   30.78
  -1 -15  33  500.40   30.04
   1 -15 -33  494.20   29.53
  -1  15 -33  459.70   27.53
   1 -15  35    2.03    2.64
  -1  15  35    3.75    3.04
  -1 -15 -35    0.53    2.44
   1  15  35    4.51    2.55
  -1 -15  35    2.07    2.91
  -1 -15  35   -0.30    2.70
   1 -15 -35    1.69    2.50
  -1  15 -35    5.78    2.75
   1 -15  37   84.59    6.21
  -1  15  37   78.37    6.15
   1  15  37   84.54    5.88
  -1 -15  37   86.60    6.75
  -1 -15  37   76.28    6.17
   1 -15 -37   87.29    6.46
  -1  15 -37   84.95    6.22
   1 -15  39   16.24    3.10
  -1  15  39   11.47    2.98
  -1 -15 -39   11.75    2.43
   1  15  39   11.15    2.25
  -1 -15  39   13.67    2.96
  -1 -15  39    9.79    3.07
   1 -15 -39   14.88    2.95
  -1  15 -39   10.05    2.44
   1 -15  41   20.23    2.85
   1 -15  41   17.39    2.98
  -1  15  41   14.79    2.97
  -1 -15 -41   20.60    2.46
   1  15  41   18.01    2.28
  -1 -15  41   17.51    3.27
  -1 -15  41   19.31    3.05
   1 -15 -41   20.14    3.22
   1 -15  43    8.32    2.52
   1 -15  43    7.87    2.64
  -1  15  43    4.30    2.62
  -1 -15 -43    2.41    2.08
   1  15  43    4.44    1.73
  -1 -15  43    4.73    2.97
  -1 -15  43    3.09    3.11
   1 -15 -43    3.31    2.85
   1 -15  45    3.60    2.15
   1 -15  45    8.00    2.24
  -1  15  45    2.12    2.29
  -1 -15 -45    4.85    1.21
  -1 -15  45    6.71    2.84
  -1 -15  45    4.01    2.64
   1 -15 -45    3.38    2.37
   1 -15  47   23.22    2.86
   1 -15  47   27.91    2.90
  -1  15  47   31.03    3.47
  -1 -15  47   27.42    3.52
  -1 -15  47   26.16    3.38
   1 -15 -47   21.96    2.93
   1 -15  49   41.57    3.26
   1 -15  49   33.71    2.89
  -1  15  49   40.65    3.69
  -1 -15  49   40.99    3.89
  -1 -15  49   44.62    4.13
   1 -15 -49   51.15    4.08
  -1  15  51    1.07    2.22
  -1 -15  51    1.92    2.57
  -1 -15  51    6.33    2.60
   1 -15 -51    1.91    2.37
  -1 -15  53   -0.51    2.52
  -1 -15  53    1.89    2.58
  -1 -15  55    0.80    2.39
  -1 -15  55    2.23    2.49
  -1 -15  57    4.31    1.88
  -1 -15  57    6.52    1.92
   1 -17   1 2307.00  134.40
  -1  17   1 2272.00  132.50
   1  17  -1 2215.00  129.10
  -1 -17  -1 2520.00  146.70
   1  17   1 2413.00  140.60
  -1 -17   1 2448.00  142.50
   1 -17  -1 1997.00  116.50
  -1  17  -1 2272.00  132.50
   1 -17   3 1226.00   72.05
  -1  17   3 1152.00   67.79
   1  17  -3 1177.00   69.29
  -1 -17  -3 1295.00   75.95
   1  17   3 1301.00   76.40
  -1 -17   3 1230.00   72.24
   1 -17  -3 1175.00   68.98
  -1  17  -3 1291.00   75.89
   1 -17   5  190.30   12.87
  -1  17   5  209.20   13.59
   1  17  -5  197.40   12.89
  -1 -17  -5  192.60   12.63
   1  17   5  181.50   12.59
  -1 -17   5  197.40   13.31
   1 -17  -5  190.30   12.77
  -1  17  -5  178.60   12.32
   1 -17   7  147.70   10.42
  -1  17   7  147.10   10.45
   1  17  -7  150.60   11.02
  -1 -17  -7  133.30    9.27
   1  17   7  165.40   11.55
  -1 -17   7  160.40   11.23
   1 -17  -7  146.00   10.43
  -1  17  -7  153.90   10.71
   1 -17   9   13.97    3.44
  -1  17   9    8.46    4.50
   1  17  -9   18.14    4.64
  -1 -17  -9   10.45    3.08
   1  17   9   19.32    3.58
  -1 -17   9   15.60    3.61
   1 -17  -9   20.94    4.77
  -1  17  -9   17.68    4.48
   1 -17  11  330.00   20.65
  -1  17  11  298.70   18.67
   1  17 -11  283.00   17.75
  -1 -17 -11  320.20   19.87
   1  17  11  317.40   19.72
  -1 -17  11  279.60   17.86
   1 -17 -11  300.80   18.80
   1 -17  13    0.73    2.82
  -1  17  13    5.91    3.71
   1  17 -13    5.04    3.75
  -1 -17 -13    3.69    2.72
   1  17  13    0.13    3.33
  -1 -17  13    2.75    3.65
   1 -17 -13    2.71    2.75
  -1  17 -13    5.66    2.98
   1 -17  15   40.70    4.91
  -1  17  15   41.16    4.34
   1  17 -15   48.34    5.50
  -1 -17 -15   51.85    5.12
   1  17  15   37.61    4.64
  -1 -17  15   47.42    4.81
   1 -17 -15   46.91    5.35
  -1  17 -15   49.36    5.44
   1 -17  17  188.90   12.54
  -1  17  17  201.50   12.95
   1  17 -17  197.30   13.12
  -1 -17 -17  175.70   11.56
   1  17  17  181.90   12.04
  -1 -17  17  186.20   12.12
   1 -17 -17  191.30   12.52
  -1  17 -17  214.00   13.77
   1 -17  19    3.50    3.66
  -1  17  19    5.32    2.53
   1  17 -19    1.89    3.35
  -1 -17 -19    2.23    2.32
   1  17  19    3.92    3.06
  -1 -17  19    2.34    2.61
   1 -17 -19    7.34    3.60
  -1  17 -19    1.78    2.90
   1 -17  21   27.63    4.02
  -1  17  21   28.10    3.70
   1  17 -21   34.28    4.54
  -1 -17 -21   27.20    3.93
   1  17  21   27.66    3.89
  -1 -17  21   28.17    4.26
   1 -17 -21   33.97    4.39
  -1  17 -21   30.83    3.81
   1 -17  23    3.41    3.10
  -1  17  23    4.82    3.21
   1  17 -23    4.89    3.44
  -1 -17 -23   10.82    3.53
   1  17  23    8.46    3.16
  -1 -17  23    5.49    3.68
   1 -17 -23    2.33    3.28
  -1  17 -23    5.88    3.20
   1 -17  25   21.20    3.52
  -1  17  25   16.63    3.36
   1  17 -25   23.01    4.01
  -1 -17 -25   12.30    2.96
   1  17  25   24.95    3.80
  -1 -17  25   21.16    3.94
   1 -17 -25   13.42    3.52
  -1  17 -25   15.33    3.50
   1 -17  27    1.73    3.15
  -1  17  27    3.69    3.01
   1  17 -27    0.48    3.14
  -1 -17 -27   -0.96    2.55
   1  17  27    1.48    2.89
  -1 -17  27   -0.27    3.02
   1 -17 -27   -2.62    3.00
  -1  17 -27    0.08    3.27
   1 -17  29   77.21    6.18
  -1  17  29   62.35    5.21
   1  17 -29   77.17    6.44
  -1 -17 -29   78.36    5.95
   1  17  29   59.14    4.92
  -1 -17  29   66.42    5.64
   1 -17 -29   74.80    6.10
  -1  17 -29   59.83    5.16
   1 -17  31   78.00    6.00
  -1  17  31   77.04    5.88
   1  17 -31   80.68    6.61
  -1 -17 -31   92.95    6.54
   1  17  31   79.13    5.80
  -1 -17  31   73.80    6.08
   1 -17 -31   65.84    5.55
  -1  17 -31   76.15    6.20
   1 -17  33    2.06    2.79
  -1  17  33   -7.06    2.99
   1  17 -33    0.88    3.41
  -1 -17 -33   -2.53    2.96
   1  17  33   -0.46    2.39
  -1 -17  33    2.34    3.24
   1 -17 -33    1.53    3.31
  -1  17 -33   -1.50    2.92
   1 -17  35  368.00   22.32
  -1  17  35  446.60   27.13
   1  17 -35  463.80   28.01
  -1 -17 -35  430.40   25.84
   1  17  35  396.00   23.86
  -1 -17  35  405.40   24.63
  -1  17 -35  431.80   26.00
   1 -17  37  122.50    8.41
  -1  17  37  100.60    7.34
  -1 -17 -37  119.80    8.06
   1  17  37  105.70    7.17
  -1 -17  37  115.50    8.16
  -1 -17  37   95.50    7.34
   1 -17 -37  123.70    8.62
  -1  17 -37  123.30    8.43
   1 -17  39  559.00   33.42
  -1  17  39  503.00   29.91
   1  17  39  512.20   30.33
  -1 -17  39  512.00   30.53
  -1 -17  39  530.70   31.90
   1 -17 -39  638.90   37.86
  -1  17 -39  517.10   30.83
   1 -17  41  207.90   13.23
  -1  17  41  200.50   12.76
   1  17  41  217.20   13.49
  -1 -17  41  171.00   11.24
  -1 -17  41  206.00   13.17
   1 -17 -41  190.60   12.12
  -1  17 -41  193.60   12.22
   1 -17  43  143.60    9.36
   1 -17  43  126.10    8.25
  -1 -17 -43  129.70    8.34
   1  17  43  125.40    8.09
  -1 -17  43  116.80    8.22
  -1 -17  43  115.90    8.20
   1 -17 -43  125.60    8.52
   1 -17  45   22.77    3.17
   1 -17  45   21.46    2.96
  -1  17  45   14.62    2.78
  -1 -17 -45   19.35    2.61
   1  17  45   17.35    2.45
  -1 -17  45   19.34    3.00
  -1 -17  45   24.98    3.42
   1 -17 -45   20.54    3.70
   1 -17  47  203.30   12.57
   1 -17  47  194.50   12.10
  -1  17  47  210.40   13.27
  -1 -17 -47  181.00   10.96
   1  17  47  189.00   11.40
  -1 -17  47  200.10   12.70
  -1 -17  47  214.50   13.44
   1 -17 -47  199.80   12.49
   1 -17  49  130.50    8.45
   1 -17  49  124.20    7.96
  -1  17  49  121.40    8.18
  -1 -17  49  125.50    8.56
  -1 -17  49  125.50    8.50
   1 -17 -49  136.60    8.89
   1 -17  51  225.30   13.59
  -1  17  51  194.70   12.09
  -1 -17  51  179.20   11.45
  -1 -17  51  208.60   13.08
   1 -17 -51  194.70   12.04
  -1  17  53   98.57    6.58
  -1 -17  53  132.90    8.84
  -1 -17  53  119.00    7.96
   1 -17 -53  109.20    7.20
  -1 -17  55   21.09    3.39
  -1 -17  55   20.13    3.15
  -1 -17  57    2.79    2.70
  -1 -17  57    1.02    2.91
   1 -19   1   57.89    5.52
   1  19  -1   51.27    5.96
  -1 -19  -1   67.85    6.64
   1  19   1   51.40    5.93
  -1 -19   1   69.18    6.89
   1 -19  -1   68.32    6.40
  -1  19  -1   60.34    5.60
   1 -19   3   98.37    7.59
  -1  19   3  108.10    8.46
   1  19  -3  100.70    7.58
  -1 -19  -3  110.70    8.17
   1  19   3   91.01    7.75
  -1 -19   3  101.40    8.13
   1 -19  -3   94.74    7.83
  -1  19  -3   98.59    8.01
   1 -19   5   59.36    5.56
  -1  19   5   66.15    6.45
   1  19  -5   68.02    6.42
  -1 -19  -5   65.52    6.41
   1  19   5   72.52    6.88
  -1 -19   5   70.19    6.33
   1 -19  -5   60.17    6.12
  -1  19  -5   59.80    5.47
   1 -19   7  131.70    9.28
  -1  19   7  138.70    9.92
   1  19  -7  124.10    8.69
  -1 -19  -7  117.20    8.93
   1  19   7  146.80   10.06
  -1 -19   7  152.30   10.92
   1 -19  -7  126.50    9.18
  -1  19  -7  139.00    9.89
   1 -19   9   75.58    6.92
  -1  19   9   73.15    6.16
   1  19  -9   89.05    7.56
  -1 -19  -9   64.59    6.24
   1  19   9   76.93    6.73
  -1 -19   9   80.35    7.17
   1 -19  -9   82.11    7.10
  -1  19  -9   73.32    6.53
   1 -19  11  480.90   29.20
  -1  19  11  399.90   24.46
   1  19 -11  505.10   30.56
  -1 -19 -11  447.70   27.19
   1  19  11  434.90   26.33
  -1 -19  11  444.50   27.13
   1 -19 -11  457.90   27.80
  -1  19 -11  463.20   28.14
   1 -19  13   36.28    5.19
  -1  19  13   37.19    4.52
   1  19 -13   35.86    4.75
  -1 -19 -13   21.56    3.56
   1  19  13   37.46    5.02
  -1 -19  13   28.87    4.01
   1 -19 -13   35.32    4.77
  -1  19 -13   32.85    4.07
   1 -19  15  860.60   50.94
  -1  19  15  881.50   52.15
   1  19  15  794.80   47.11
  -1 -19  15  898.20   53.19
   1 -19 -15  888.00   52.47
  -1  19 -15  874.40   51.69
   1 -19  17  103.40    7.54
  -1  19  17   92.56    7.40
   1  19 -17  108.30    8.21
  -1 -19 -17  106.70    7.82
   1  19  17   89.34    6.91
  -1 -19  17   93.29    7.59
   1 -19 -17   91.82    7.44
  -1  19 -17  111.00    8.41
   1 -19  19 1253.00   73.58
  -1  19  19 1230.00   72.09
   1  19 -19 1290.00   75.67
  -1 -19 -19 1234.00   72.31
   1  19  19 1351.00   78.97
  -1 -19  19 1198.00   70.38
   1 -19 -19 1285.00   75.37
  -1  19 -19 1214.00   71.26
   1 -19  21  311.60   19.48
  -1  19  21  291.60   18.04
   1  19 -21  297.80   18.71
  -1 -19 -21  295.20   18.25
   1  19  21  281.70   17.53
  -1 -19  21  301.90   18.79
  -1  19 -21  288.90   18.04
   1 -19  23  925.70   54.65
  -1  19  23  967.70   57.11
   1  19 -23  913.30   53.99
  -1 -19 -23  909.60   53.61
   1  19  23  886.00   52.32
  -1 -19  23  951.40   56.23
  -1  19 -23  938.10   55.35
   1 -19  25    7.32    3.43
  -1  19  25   10.69    3.52
   1  19 -25    9.38    3.63
  -1 -19 -25   13.19    3.29
   1  19  25    3.86    2.94
  -1 -19  25   10.07    3.90
   1 -19 -25    9.71    3.68
  -1  19 -25   13.80    3.62
   1 -19  27  798.40   47.17
  -1  19  27  810.00   48.15
   1  19 -27  818.80   48.44
  -1 -19 -27  834.20   49.17
   1  19  27  804.10   47.33
  -1 -19  27  804.40   47.83
   1 -19 -27  927.10   54.81
  -1  19 -27  790.30   46.78
   1 -19  29   23.69    3.82
  -1  19  29   40.78    4.47
   1  19 -29   35.51    4.44
  -1 -19 -29   33.48    4.09
   1  19  29   30.73    3.52
  -1 -19  29   29.73    4.17
   1 -19 -29   40.10    4.63
  -1  19 -29   34.42    4.43
   1 -19  31  344.80   21.10
  -1  19  31  370.60   22.55
   1  19 -31  344.50   21.28
  -1 -19 -31  410.70   24.79
   1  19  31  354.70   21.65
  -1 -19  31  345.90   21.27
   1 -19 -31  383.60   23.40
  -1  19 -31  355.80   21.80
   1 -19  33   38.28    4.37
  -1  19  33   47.07    4.96
   1  19 -33   49.10    5.31
  -1 -19 -33   42.67    4.41
   1  19  33   47.85    4.93
  -1 -19  33   43.57    4.80
   1 -19 -33   40.46    4.53
  -1  19 -33   48.68    4.80
   1 -19  35   76.34    6.29
  -1  19  35   89.26    7.06
   1  19 -35   80.13    6.56
  -1 -19 -35   86.64    6.47
   1  19  35   76.02    6.15
  -1 -19  35   83.58    6.84
   1 -19 -35   82.27    6.67
  -1  19 -35   83.78    6.45
   1 -19  37   96.36    7.24
   1  19 -37  112.80    8.11
  -1 -19 -37   97.85    6.98
   1  19  37   88.87    6.47
  -1 -19  37   78.63    6.43
   1 -19 -37   92.88    6.99
  -1  19 -37   90.37    6.71
   1 -19  39   14.53    3.50
  -1  19  39    9.56    3.28
  -1 -19 -39    9.81    2.95
   1  19  39   11.85    2.71
  -1 -19  39   10.92    3.65
  -1 -19  39   14.02    3.49
   1 -19 -39    9.86    3.09
  -1  19 -39   14.33    3.16
   1 -19  41  214.80   13.68
  -1  19  41  221.40   14.19
   1  19  41  198.60   12.52
  -1 -19  41  210.60   13.57
  -1 -19  41  208.10   13.38
   1 -19 -41  228.60   14.30
  -1  19 -41  206.60   13.12
   1 -19  43  236.60   14.80
  -1  19  43  243.10   15.01
   1  19  43  223.80   13.71
  -1 -19  43  236.30   15.08
  -1 -19  43  246.30   15.43
   1 -19 -43  257.00   16.01
   1 -19  45   16.65    3.00
   1 -19  45   16.75    3.27
  -1  19  45   27.44    3.65
  -1 -19 -45   20.82    2.83
   1  19  45   19.54    2.72
  -1 -19  45   19.80    3.47
  -1 -19  45   13.00    3.38
   1 -19 -45   22.25    3.59
   1 -19  47   12.60    2.83
   1 -19  47   10.26    2.79
  -1  19  47   14.54    3.07
  -1 -19 -47    9.55    2.29
   1  19  47   10.23    2.61
  -1 -19  47   15.51    3.35
  -1 -19  47   13.87    3.03
   1 -19 -47   12.08    3.36
   1 -19  49  150.20    9.82
   1 -19  49  161.10   10.27
  -1  19  49  164.90   10.60
  -1 -19 -49  148.90    9.12
   1  19  49  142.90    8.78
  -1 -19  49  152.20    9.93
  -1 -19  49  137.70    9.29
   1 -19 -49  134.80    8.94
   1 -19  51   41.23    3.89
   1 -19  51   30.99    3.42
  -1  19  51   34.36    3.93
  -1 -19  51   40.42    4.30
  -1 -19  51   43.12    4.31
   1 -19 -51   37.71    3.90
   1 -19  53   80.83    5.54
   1 -19  53   79.65    5.70
  -1  19  53   78.42    5.84
  -1 -19  53   85.88    6.66
  -1 -19  53   86.39    6.53
   1 -19 -53   79.87    5.70
  -1  19  55   22.83    3.01
  -1 -19  55   29.32    4.17
  -1 -19  55   28.62    3.89
   1 -19 -55   23.40    3.23
  -1 -19  57   -1.04    3.40
  -1 -19  57   -0.77    2.86
  -1 -19  59   20.76    3.49
  -1 -19  59   13.38    3.22
   1 -21   1   95.24    7.40
  -1  21   1  119.20    8.89
   1  21  -1  104.40    8.51
  -1 -21  -1  122.80    9.30
   1  21   1  100.00    8.07
  -1 -21   1  112.20    8.98
   1 -21  -1  106.90    8.44
  -1  21  -1  134.50    9.68
   1 -21   3   42.41    4.81
  -1  21   3   47.77    5.01
   1  21  -3   44.81    4.97
  -1 -21  -3   40.56    4.64
   1  21   3   40.11    5.32
  -1 -21   3   42.17    5.60
   1 -21  -3   35.45    5.08
  -1  21  -3   36.89    5.67
   1 -21   5    1.80    3.98
  -1  21   5    0.84    3.37
   1  21  -5    2.79    3.92
  -1 -21  -5    5.58    4.41
   1  21   5   -2.00    3.12
  -1 -21   5    4.26    4.64
   1 -21  -5    1.23    3.67
  -1  21  -5   -1.75    3.91
   1 -21   7  334.70   21.15
  -1  21   7  330.90   20.88
   1  21  -7  326.10   20.41
  -1 -21  -7  335.60   20.76
   1  21   7  316.00   19.87
  -1 -21   7  375.40   23.33
   1 -21  -7  329.30   20.68
  -1  21  -7  365.90   22.78
   1 -21   9    5.56    3.33
  -1  21   9    3.77    4.73
   1  21  -9    6.37    3.64
  -1 -21  -9   10.82    3.91
   1  21   9    0.19    3.71
  -1 -21   9    4.90    4.13
   1 -21  -9   -4.77    4.21
  -1  21  -9    1.40    3.08
   1 -21  11 1031.00   60.87
  -1  21  11 1081.00   63.72
   1  21 -11 1036.00   61.15
  -1 -21 -11 1010.00   59.60
   1  21  11 1091.00   64.29
  -1 -21  11 1038.00   61.46
   1 -21 -11 1002.00   59.14
  -1  21 -11  979.50   57.78
   1 -21  13   94.04    7.21
  -1  21  13   97.42    8.25
   1  21 -13   88.39    7.49
  -1 -21 -13   96.42    7.39
   1  21  13  100.30    7.82
  -1 -21  13   87.07    7.76
   1 -21 -13   92.33    7.09
  -1  21 -13   85.60    7.00
   1 -21  15  418.60   25.60
  -1  21  15  458.20   28.28
   1  21 -15  445.60   27.20
  -1 -21 -15  450.60   27.39
   1  21  15  403.80   24.64
  -1 -21  15  440.20   26.92
   1 -21 -15  388.20   23.72
  -1  21 -15  377.50   23.16
   1 -21  17   11.42    3.94
  -1  21  17   25.27    4.96
   1  21 -17    7.53    3.70
  -1 -21 -17   14.77    4.02
   1  21  17   10.28    3.33
  -1 -21  17   16.02    3.53
   1 -21 -17    7.75    3.52
  -1  21 -17   10.39    3.43
   1 -21  19 1185.00   69.59
  -1  21  19 1331.00   78.13
   1  21 -19 1225.00   72.00
   1  21  19 1301.00   76.24
  -1 -21  19 1278.00   75.20
   1 -21 -19 1204.00   70.78
  -1  21 -19 1274.00   74.80
   1 -21  21 1021.00   60.15
   1  21 -21  972.60   57.46
  -1 -21 -21 1071.00   63.02
   1  21  21  892.50   52.87
  -1 -21  21  989.70   58.50
   1 -21 -21  956.50   56.45
  -1  21 -21  911.40   53.89
   1 -21  23  762.60   45.48
  -1  21  23  757.20   45.06
   1  21 -23  713.00   42.52
   1  21  23  778.60   46.34
  -1 -21  23  732.40   43.57
   1 -21 -23  757.50   44.97
  -1  21 -23  736.70   43.82
   1 -21  25    5.47    3.65
  -1  21  25    1.78    3.79
   1  21 -25    0.79    3.48
  -1 -21 -25    0.80    3.15
   1  21  25   -1.27    3.32
  -1 -21  25    1.66    3.31
   1 -21 -25    3.34    3.01
  -1  21 -25    4.72    3.35
   1 -21  27   69.78    6.16
  -1  21  27   62.91    5.60
   1  21 -27   67.84    6.19
  -1 -21 -27   67.42    5.57
   1  21  27   69.63    5.79
  -1 -21  27   68.98    6.27
   1 -21 -27   49.92    5.41
  -1  21 -27   69.52    6.10
   1 -21  29  102.50    7.61
   1  21 -29  106.60    8.14
  -1 -21 -29  114.00    8.23
   1  21  29  101.10    7.46
  -1 -21  29  110.30    8.45
   1 -21 -29  106.60    8.15
   1 -21  31  195.20   12.68
  -1  21  31  255.40   16.02
   1  21 -31  225.60   14.59
  -1 -21 -31  217.70   14.01
   1  21  31  232.30   14.99
  -1 -21  31  184.70   12.27
   1 -21 -31  206.90   13.56
  -1  21 -31  206.20   13.54
   1 -21  33  178.80   11.75
  -1  21  33  177.30   11.91
   1  21 -33  182.30   12.20
   1  21  33  185.80   12.26
  -1 -21  33  175.90   11.77
   1 -21 -33  165.40   11.11
  -1  21 -33  196.10   12.95
   1 -21  35  195.30   12.82
  -1  21  35  210.20   13.72
   1  21 -35  209.10   13.64
  -1 -21 -35  206.50   13.23
   1  21  35  215.10   13.48
  -1 -21  35  190.70   12.77
   1 -21 -35  237.60   15.18
  -1  21 -35  186.50   12.26
   1 -21  37  131.50    9.40
  -1  21  37  125.40    8.77
   1  21 -37  127.80    9.11
  -1 -21 -37  129.90    8.85
   1  21  37  145.30    9.67
  -1 -21  37  141.10    9.91
   1 -21 -37  156.80   10.83
  -1  21 -37  138.60    9.65
   1 -21  39   29.24    3.99
  -1  21  39   35.94    4.33
  -1 -21 -39   37.47    4.08
   1  21  39   31.82    3.94
  -1 -21  39   33.82    4.55
   1 -21 -39   32.88    4.25
  -1  21 -39   35.21    4.06
   1 -21  41    3.29    3.42
  -1  21  41    0.80    2.90
  -1 -21 -41    1.60    2.86
   1  21  41    3.38    2.85
  -1 -21  41    3.69    3.29
  -1 -21  41    9.64    3.67
   1 -21 -41    4.49    3.36
  -1  21 -41    3.94    3.12
   1 -21  43  142.30    9.62
  -1  21  43  125.30    8.53
  -1 -21 -43  152.90    9.92
   1  21  43  134.50    9.07
  -1 -21  43  141.10    9.74
  -1 -21  43  147.50    9.85
   1 -21 -43  157.50   10.52
  -1  21 -43  137.60    9.38
   1 -21  45   43.04    4.30
  -1  21  45   39.82    4.64
  -1 -21 -45   41.80    3.99
   1  21  45   41.79    4.01
  -1 -21  45   35.05    4.34
  -1 -21  45   36.04    4.14
   1 -21 -45   39.95    4.41
   1 -21  47   82.40    6.30
   1 -21  47   80.05    6.22
  -1  21  47   84.56    6.46
  -1 -21 -47   84.08    5.97
   1  21  47   76.29    5.68
  -1 -21  47   73.58    5.98
  -1 -21  47   83.44    6.49
   1 -21 -47   71.77    5.76
   1 -21  49   54.87    4.94
   1 -21  49   66.54    5.24
  -1  21  49   59.71    5.06
  -1 -21 -49   51.70    4.21
   1  21  49   58.91    4.64
  -1 -21  49   69.80    5.80
  -1 -21  49   62.18    5.30
   1 -21 -49   77.43    6.45
   1 -21  51   70.32    5.40
   1 -21  51   73.79    6.01
  -1  21  51   68.58    5.53
  -1 -21 -51   63.65    4.55
   1  21  51   58.69    4.08
  -1 -21  51   67.12    5.40
  -1 -21  51   67.68    5.47
   1 -21 -51   55.48    4.84
   1 -21  53    9.40    3.24
   1 -21  53    8.58    2.96
  -1  21  53   14.39    3.35
  -1 -21  53   15.38    3.34
  -1 -21  53   16.70    3.23
   1 -21 -53    9.26    2.64
   1 -21  55   22.37    3.42
   1 -21  55   27.32    3.24
  -1  21  55   22.52    3.55
  -1 -21  55   30.64    4.25
  -1 -21  55   29.86    3.99
   1 -21 -55   24.53    3.66
  -1 -21  57   14.69    3.45
  -1 -21  57   19.07    4.32
   1 -21 -57   18.72    2.80
  -1 -21  59   27.39    3.98
  -1 -21  59   20.59    3.74
  -1 -21  61   10.49    3.06
  -1 -21  61    3.79    3.14
   1 -23   1  776.00   46.29
  -1  23   1  791.20   47.20
   1  23  -1  799.40   47.53
  -1 -23  -1  714.00   42.80
   1  23   1  877.50   52.00
  -1 -23   1 1014.00   60.07
   1 -23  -1  800.80   47.73
  -1  23  -1  805.30   47.94
   1 -23   3  242.00   15.88
  -1  23   3  273.40   17.34
   1  23  -3  247.90   15.93
  -1 -23  -3  270.80   17.42
   1  23   3  268.10   17.26
  -1 -23   3  256.50   16.85
   1 -23  -3  299.30   18.88
  -1  23  -3  259.20   16.56
   1 -23   5  294.50   18.68
  -1  23   5  307.30   19.46
   1  23  -5  299.80   18.98
  -1 -23  -5  288.80   18.15
   1  23   5  309.30   19.75
  -1 -23   5  313.50   20.01
   1 -23  -5  291.50   18.44
  -1  23  -5  283.80   18.09
   1 -23   7   41.81    4.80
  -1  23   7   39.38    5.92
   1  23  -7   27.91    4.79
  -1 -23  -7   40.01    5.45
   1  23   7   49.36    5.01
  -1 -23   7   47.20    5.10
   1 -23  -7   37.50    5.48
  -1  23  -7   32.58    4.28
   1 -23   9  124.80    9.68
  -1  23   9  131.40    9.69
   1  23  -9  108.60    8.03
  -1 -23  -9  104.00    8.11
   1  23   9  115.20    8.91
  -1 -23   9  110.70    8.85
   1 -23  -9  131.40    9.74
  -1  23  -9  111.60    8.71
   1 -23  11  164.70   11.22
  -1  23  11  182.60   12.52
   1  23 -11  137.70   10.15
   1  23  11  142.80   10.09
  -1 -23  11  130.90    9.38
   1 -23 -11  125.00    9.40
  -1  23 -11  126.90    9.01
   1 -23  13   56.36    5.97
  -1  23  13   66.20    6.06
   1  23 -13   67.85    5.86
  -1 -23 -13   80.00    6.50
   1  23  13   62.42    6.36
  -1 -23  13   58.79    6.47
   1 -23 -13   58.55    6.11
  -1  23 -13   54.34    5.62
   1 -23  15   -0.59    4.20
  -1  23  15   -0.36    4.11
   1  23 -15   -0.37    4.61
  -1 -23 -15    5.98    2.95
   1  23  15    2.50    3.90
  -1 -23  15    3.97    4.36
   1 -23 -15   -0.16    3.74
  -1  23 -15    0.41    3.90
   1 -23  17    0.63    4.21
  -1  23  17    3.95    3.99
   1  23 -17    6.56    4.33
  -1 -23 -17   -3.35    3.41
   1  23  17    5.94    3.72
  -1 -23  17   -1.80    4.14
   1 -23 -17    0.08    3.65
  -1  23 -17    1.94    3.78
   1 -23  19   12.16    4.35
  -1  23  19   15.93    3.91
   1  23 -19   16.34    4.43
  -1 -23 -19   13.92    4.08
   1  23  19   19.08    3.93
  -1 -23  19   14.78    4.57
   1 -23 -19   18.03    4.39
  -1  23 -19   23.86    4.35
   1 -23  21  105.50    8.21
   1  23 -21  103.60    8.15
  -1 -23 -21   99.03    7.51
   1  23  21   98.70    7.67
  -1 -23  21  103.10    8.48
   1 -23 -21   77.63    6.95
  -1  23 -21  105.00    7.99
   1 -23  23  123.80    8.67
  -1  23  23  125.10    9.21
   1  23 -23  128.80    9.48
  -1 -23 -23  106.30    8.12
   1  23  23  109.70    8.42
  -1 -23  23  134.20    9.72
   1 -23 -23  143.60   10.09
  -1  23 -23  123.70    9.15
   1 -23  25   37.83    4.92
  -1  23  25   38.73    5.08
   1  23 -25   34.77    4.76
  -1 -23 -25   41.64    5.35
   1  23  25   42.79    4.63
  -1 -23  25   25.69    4.32
   1 -23 -25   34.89    4.61
  -1  23 -25   31.70    4.18
   1 -23  27  103.20    7.56
  -1  23  27  108.40    8.07
   1  23 -27  113.60    8.57
  -1 -23 -27  111.20    8.16
   1  23  27   91.99    6.79
  -1 -23  27  103.70    8.01
  -1  23 -27  106.60    8.19
   1 -23  29  202.80   13.26
  -1  23  29  194.10   12.66
   1  23 -29  185.30   12.43
  -1 -23 -29  226.10   14.51
   1  23  29  180.10   11.77
  -1 -23  29  212.70   14.19
  -1  23 -29  193.70   12.86
   1 -23  31  143.10   10.12
  -1  23  31  142.70   10.02
   1  23 -31  138.90   10.01
  -1 -23 -31  136.80    9.60
   1  23  31  133.70    9.55
  -1 -23  31  134.50    9.72
   1 -23 -31  140.00    9.91
  -1  23 -31  153.00   10.59
   1 -23  33   83.71    6.99
  -1  23  33   84.39    7.17
   1  23 -33   82.10    6.87
  -1 -23 -33   69.91    6.14
   1  23  33   81.05    6.49
  -1 -23  33   82.86    6.80
   1 -23 -33   75.03    6.35
  -1  23 -33   74.00    6.42
   1 -23  35   65.49    5.83
  -1  23  35   71.99    6.32
   1  23 -35   74.47    6.40
  -1 -23 -35   79.36    6.64
   1  23  35   80.31    6.31
  -1 -23  35   77.62    6.60
   1 -23 -35   75.15    6.34
  -1  23 -35   74.50    6.56
   1 -23  37   63.07    5.70
  -1  23  37   60.19    5.55
   1  23 -37   54.91    5.42
  -1 -23 -37   59.28    5.63
   1  23  37   59.37    5.51
  -1 -23  37   58.74    5.68
   1 -23 -37   44.30    4.77
  -1  23 -37   50.28    5.06
   1 -23  39   74.47    6.28
  -1  23  39   69.41    6.08
   1  23 -39   70.59    6.18
  -1 -23 -39   71.21    5.98
   1  23  39   77.07    6.29
  -1 -23  39   76.78    6.43
   1 -23 -39   73.40    6.18
  -1  23 -39   77.48    6.23
   1 -23  41   -0.21    3.40
  -1  23  41   -0.58    2.95
  -1 -23 -41    3.08    3.32
   1  23  41   -2.66    2.74
  -1 -23  41    0.58    3.42
  -1 -23  41   -0.33    3.28
   1 -23 -41    2.02    3.15
  -1  23 -41   -6.94    3.01
   1 -23  43  565.40   33.95
  -1  23  43  481.40   28.97
  -1 -23 -43  543.70   32.41
  -1 -23  43  480.10   28.77
  -1 -23  43  498.60   30.00
   1 -23 -43  556.10   33.18
  -1  23 -43  495.50   29.74
   1 -23  45   45.44    4.62
  -1 -23 -45   53.52    4.68
   1  23  45   49.57    4.62
  -1 -23  45   50.13    5.04
  -1 -23  45   50.48    5.13
   1 -23 -45   38.03    4.55
  -1  23 -45   53.75    5.08
   1 -23  47  211.80   13.50
   1 -23  47  177.00   11.44
  -1  23  47  218.90   13.87
  -1 -23 -47  201.60   12.77
   1  23  47  190.30   12.04
  -1 -23  47  192.50   12.54
  -1 -23  47  201.50   12.94
   1 -23 -47  181.70   11.74
   1 -23  49   89.01    6.54
   1 -23  49   79.47    6.30
  -1  23  49   67.54    5.73
  -1 -23 -49   88.51    6.25
   1  23  49   90.32    6.54
  -1 -23  49   88.09    6.84
  -1 -23  49   71.32    5.92
   1 -23 -49   93.08    6.88
   1 -23  51  264.30   16.65
   1 -23  51  220.70   13.83
  -1  23  51  225.30   14.22
   1  23  51  243.40   14.88
  -1 -23  51  222.30   13.97
  -1 -23  51  238.60   15.06
   1 -23  53    5.76    3.04
   1 -23  53    7.71    3.76
  -1 -23 -53    1.44    1.86
  -1 -23  53    6.11    3.40
  -1 -23  53    7.17    3.11
   1 -23 -53   12.60    3.20
   1 -23  55   68.41    5.66
   1 -23  55   64.05    6.06
  -1  23  55   68.62    5.73
  -1 -23  55   69.05    5.74
  -1 -23  55   73.57    6.36
   1 -23 -55   64.03    5.60
   1 -23  57    9.70    3.11
   1 -23  57    6.47    2.98
  -1  23  57    6.35    3.20
  -1 -23  57    3.48    3.28
  -1 -23  57   13.02    4.17
   1 -23 -57    9.66    3.41
  -1 -23  59    8.70    3.81
  -1 -23  59   11.01    3.73
   1 -25   1 1518.00   89.02
  -1  25   1 1685.00   98.69
   1  25  -1 1414.00   83.02
  -1 -25  -1 1470.00   86.26
   1  25   1 1537.00   90.17
  -1 -25   1 1505.00   88.31
   1 -25  -1 1596.00   93.52
  -1  25  -1 1443.00   84.77
   1 -25   3  120.90    8.91
  -1  25   3  123.50    9.32
   1  25  -3  118.40    9.21
  -1 -25  -3  137.40   10.11
   1  25   3  113.90    8.98
  -1 -25   3  127.60    9.83
   1 -25  -3  127.40    9.45
  -1  25  -3  127.20    9.60
   1 -25   5   20.32    4.72
  -1  25   5   26.43    4.31
   1  25  -5   26.34    5.16
  -1 -25  -5   30.36    5.15
   1  25   5   29.06    4.15
  -1 -25   5   25.44    5.35
   1 -25  -5   26.77    4.98
  -1  25  -5   29.24    4.05
   1 -25   7   10.88    4.58
  -1  25   7    3.40    4.64
   1  25  -7   14.95    4.47
  -1 -25  -7   10.98    3.41
   1  25   7   15.78    4.52
  -1 -25   7   12.72    3.68
   1 -25  -7   12.73    4.57
  -1  25  -7    8.27    4.09
   1 -25   9   37.41    4.48
  -1  25   9   50.02    5.03
   1  25  -9   35.52    4.52
  -1 -25  -9   41.55    5.73
   1  25   9   33.19    4.14
  -1 -25   9   42.30    5.81
   1 -25  -9   36.28    5.29
  -1  25  -9   52.81    6.25
   1 -25  11  855.10   50.77
  -1  25  11  761.20   45.46
   1  25 -11  931.70   55.27
  -1 -25 -11  911.40   53.99
   1  25  11  846.20   50.35
  -1 -25  11  865.90   51.34
   1 -25 -11  959.80   57.14
  -1  25 -11  992.10   58.64
   1 -25  13  275.70   17.76
  -1  25  13  274.40   17.71
   1  25 -13  298.60   18.88
  -1 -25 -13  320.90   19.99
   1  25  13  256.10   16.65
  -1 -25  13  292.20   18.64
   1 -25 -13  261.40   16.64
  -1  25 -13  283.70   18.07
   1 -25  15  121.30    9.05
  -1  25  15  132.30    9.62
   1  25 -15  134.00   10.12
  -1 -25 -15  125.00    9.28
   1  25  15  139.40    9.94
  -1 -25  15  137.00   10.24
   1 -25 -15  141.90   10.15
  -1  25 -15  125.40    9.51
   1 -25  17    2.07    3.82
  -1  25  17    5.47    3.84
   1  25 -17   -2.64    3.58
  -1 -25 -17    0.31    3.80
   1  25  17    2.61    3.77
  -1 -25  17    5.26    4.31
   1 -25 -17   -2.06    3.92
  -1  25 -17    1.16    4.15
   1 -25  19  663.40   39.87
  -1  25  19  656.40   39.15
   1  25 -19  682.60   40.88
  -1 -25 -19  718.80   42.81
   1  25  19  602.60   36.18
  -1 -25  19  675.90   40.37
   1 -25 -19  673.20   40.34
  -1  25 -19  669.30   40.21
   1 -25  21    0.29    4.16
  -1  25  21   -1.42    3.28
   1  25 -21    0.75    4.21
  -1 -25 -21    0.14    3.81
   1  25  21    4.20    3.70
  -1 -25  21    2.35    3.99
   1 -25 -21    3.51    3.76
  -1  25 -21   -1.53    3.99
   1 -25  23  696.30   41.49
  -1  25  23  619.10   37.47
   1  25 -23  671.90   40.34
   1  25  23  758.70   45.19
  -1 -25  23  705.30   42.21
   1 -25 -23  723.60   43.20
  -1  25 -23  769.90   45.85
   1 -25  25  153.60   10.61
  -1  25  25  162.60   11.35
   1  25 -25  144.60   10.43
  -1 -25 -25  159.70   11.32
   1  25  25  137.30    9.49
  -1 -25  25  143.70   10.26
   1 -25 -25  152.70   10.77
  -1  25 -25  145.60   10.23
   1 -25  27  251.10   16.27
  -1  25  27  240.20   15.39
   1  25 -27  216.60   14.38
   1  25  27  236.70   15.14
  -1 -25  27  234.60   15.28
   1 -25 -27  248.10   15.99
  -1  25 -27  248.20   16.04
   1 -25  29    2.58    3.80
  -1  25  29    2.01    2.97
   1  25 -29    0.34    3.86
  -1 -25 -29    1.58    3.04
   1  25  29   -3.47    3.74
  -1 -25  29   -0.42    3.90
   1 -25 -29    1.89    3.70
  -1  25 -29   -0.59    3.54
   1 -25  31  310.40   19.31
  -1  25  31  268.90   17.05
   1  25 -31  283.80   18.20
  -1 -25 -31  294.40   18.35
   1  25  31  283.60   18.06
  -1 -25  31  297.80   18.85
   1 -25 -31  303.10   19.21
  -1  25 -31  289.00   18.25
   1 -25  33    4.02    3.41
  -1  25  33    5.68    3.77
   1  25 -33    5.02    3.91
  -1 -25 -33    1.75    3.57
   1  25  33    3.20    3.37
  -1 -25  33    0.85    3.39
   1 -25 -33    7.16    3.71
  -1  25 -33    2.43    3.45
   1 -25  35   64.29    5.63
  -1  25  35   48.64    4.98
   1  25 -35   57.75    5.54
  -1 -25 -35   67.75    5.98
   1  25  35   44.57    4.79
  -1 -25  35   56.44    5.37
   1 -25 -35   65.90    5.99
  -1  25 -35   56.49    5.78
   1 -25  37   32.98    4.49
  -1  25  37   32.31    4.04
   1  25 -37   36.36    4.67
  -1 -25 -37   33.55    4.50
   1  25  37   28.86    4.39
  -1 -25  37   37.21    4.91
   1 -25 -37   28.50    4.34
  -1  25 -37   37.36    4.86
   1 -25  39   30.82    4.64
  -1  25  39   23.85    4.06
   1  25 -39   33.29    4.61
  -1 -25 -39   28.31    4.41
   1  25  39   29.30    3.95
  -1 -25  39   33.52    4.33
   1 -25 -39   29.01    4.14
  -1  25 -39   28.35    4.52
   1 -25  41   41.09    4.84
  -1  25  41   46.58    4.79
   1  25 -41   38.43    4.57
  -1 -25 -41   42.34    4.64
   1  25  41   59.81    5.56
  -1 -25  41   54.10    5.57
  -1  25 -41   61.61    5.65
   1 -25  43   80.21    6.92
  -1  25  43   77.19    6.56
  -1 -25 -43   60.43    5.44
   1  25  43   63.69    5.63
  -1 -25  43   82.99    6.56
  -1 -25  43   67.91    5.92
   1 -25 -43   72.03    5.88
  -1  25 -43   79.98    6.50
   1 -25  45   82.13    6.57
  -1  25  45   92.63    7.17
  -1 -25 -45   85.17    6.44
   1  25  45   85.53    6.64
  -1 -25  45   94.51    7.36
  -1 -25  45   97.27    7.26
   1 -25 -45   88.25    7.02
  -1  25 -45   93.06    7.12
   1 -25  47   11.18    3.44
  -1  25  47   13.39    3.68
  -1 -25 -47    7.68    3.25
   1  25  47   -1.41    2.83
  -1 -25  47    4.80    3.59
  -1 -25  47   11.08    3.46
   1 -25 -47    7.84    3.62
  -1  25 -47   10.14    3.15
   1 -25  49   -0.89    3.39
   1 -25  49    0.49    3.12
  -1  25  49    2.15    2.88
  -1 -25 -49    0.91    2.77
   1  25  49   -3.23    2.95
  -1 -25  49   -0.11    3.20
  -1 -25  49    1.27    3.48
   1 -25 -49   -0.89    3.32
   1 -25  51    5.62    3.48
   1 -25  51    4.97    3.17
  -1  25  51    3.96    3.43
  -1 -25 -51    3.59    2.90
   1  25  51    1.66    3.31
  -1 -25  51    8.81    3.41
  -1 -25  51    3.01    3.04
   1 -25 -51    5.76    3.37
   1 -25  53  124.00    8.89
   1 -25  53  111.20    7.87
  -1  25  53  104.10    7.70
  -1 -25 -53  100.60    7.28
   1  25  53  110.40    7.49
  -1 -25  53   97.32    7.41
  -1 -25  53   98.73    7.34
   1 -25  55   -2.27    3.75
   1 -25  55    0.42    3.31
  -1  25  55   -1.54    3.42
  -1 -25  55    7.90    4.23
  -1 -25  55    2.13    3.38
   1 -25 -55    2.82    3.60
   1 -25  57    8.28    3.42
   1 -25  57    6.72    3.72
  -1  25  57    7.14    3.70
  -1 -25  57    7.77    3.90
  -1 -25  57   12.08    3.80
   1 -25 -57    8.83    3.68
   1 -25  59    0.71    3.14
   1 -25  59    3.11    3.04
  -1  25  59    2.56    2.86
  -1 -25  59    0.18    4.05
  -1 -25  59    3.57    4.36
   1 -25 -59    3.62    3.75
   1 -27   1   75.42    7.18
  -1  27   1   73.68    7.08
   1  27  -1   72.77    6.39
  -1 -27  -1   72.12    6.31
   1  27   1   70.17    6.58
  -1 -27   1   67.61    6.13
   1 -27  -1   61.74    6.74
  -1  27  -1   67.43    6.68
   1 -27   3  246.60   16.05
  -1  27   3  217.40   14.70
   1  27  -3  258.80   16.82
  -1 -27  -3  240.70   15.56
   1  27   3  268.70   17.66
  -1 -27   3  212.60   13.98
   1 -27  -3  237.60   15.75
  -1  27  -3  256.20   16.75
   1 -27   5    7.31    3.36
  -1  27   5    6.78    3.68
   1  27  -5   12.18    4.49
  -1 -27  -5   13.66    3.59
   1  27   5    8.20    4.57
  -1 -27   5   -4.10    4.43
   1 -27  -5    6.38    4.68
  -1  27  -5    6.09    4.51
   1 -27   7   47.57    6.05
  -1  27   7   50.70    6.19
   1  27  -7   43.57    4.82
  -1 -27  -7   62.80    6.81
   1  27   7   48.53    5.66
  -1 -27   7   44.43    5.39
   1 -27  -7   40.80    5.47
  -1  27  -7   54.29    6.50
   1 -27   9  168.50   11.56
  -1  27   9  152.90   10.90
   1  27  -9  158.30   11.04
  -1 -27  -9  161.50   11.59
   1  27   9  167.60   11.83
  -1 -27   9  158.70   11.27
   1 -27  -9  147.80   10.66
  -1  27  -9  150.70   10.46
   1 -27  11  304.00   19.50
  -1  27  11  291.30   18.67
   1  27 -11  315.50   19.98
   1  27  11  335.20   21.35
  -1 -27  11  280.30   17.85
   1 -27 -11  345.80   22.00
  -1  27 -11  308.20   19.55
   1 -27  13  219.20   14.68
  -1  27  13  228.40   15.13
   1  27 -13  201.40   13.44
  -1 -27 -13  229.70   14.96
   1  27  13  243.10   16.04
   1 -27 -13  214.90   14.08
  -1  27 -13  201.80   13.52
   1 -27  15  624.60   37.62
  -1  27  15  623.70   37.55
   1  27 -15  604.50   36.44
  -1 -27 -15  607.70   36.60
   1  27  15  646.70   38.77
  -1 -27  15  649.60   39.14
   1 -27 -15  596.80   36.00
  -1  27 -15  603.10   36.41
   1 -27  17  121.30    8.85
  -1  27  17  128.10    9.16
   1  27 -17  125.10    9.43
  -1 -27 -17  116.60    8.99
   1  27  17  126.10    9.28
  -1 -27  17  131.90   10.01
   1 -27 -17  113.50    9.00
  -1  27 -17  139.70   10.22
   1 -27  19  361.20   22.29
  -1  27  19  366.90   22.50
   1  27 -19  361.10   22.59
  -1 -27 -19  406.70   25.13
   1  27  19  398.70   24.65
  -1 -27  19  362.40   22.75
   1 -27 -19  354.90   22.13
  -1  27 -19  363.20   22.56
   1 -27  21   26.26    4.66
  -1  27  21   18.58    4.00
   1  27 -21   14.97    4.20
  -1 -27 -21   25.33    4.91
   1  27  21   13.85    4.62
  -1 -27  21   16.33    4.79
   1 -27 -21   23.85    4.37
  -1  27 -21   21.96    3.74
   1 -27  23  112.90    8.94
  -1  27  23  109.60    8.83
   1  27 -23  106.50    8.29
  -1 -27 -23   94.05    7.56
   1  27  23  101.80    7.86
  -1 -27  23   99.36    8.19
   1 -27 -23   90.78    7.51
  -1  27 -23   97.57    7.68
   1 -27  25   68.92    5.80
  -1  27  25   66.02    6.22
   1  27 -25   66.96    6.44
  -1 -27 -25   68.81    7.00
   1  27  25   72.82    6.33
  -1 -27  25   71.29    6.84
  -1  27 -25   67.99    6.45
   1 -27  27   25.88    4.67
  -1  27  27   24.29    4.30
   1  27 -27   29.63    4.82
  -1 -27 -27   23.70    4.05
   1  27  27   30.84    4.36
  -1 -27  27   22.91    4.97
   1 -27 -27   35.97    5.07
  -1  27 -27   32.93    4.94
   1 -27  29    2.73    2.97
  -1  27  29    3.25    3.30
   1  27 -29    7.67    4.10
  -1 -27 -29   -2.70    3.74
   1  27  29   -5.09    3.69
  -1 -27  29    3.46    3.66
   1 -27 -29   -1.29    4.19
  -1  27 -29   -0.60    4.20
   1 -27  31   19.08    4.03
  -1  27  31   16.26    4.45
   1  27 -31   22.91    4.62
  -1 -27 -31   20.49    4.09
   1  27  31   22.49    4.45
  -1 -27  31   20.58    4.12
   1 -27 -31   12.55    4.52
  -1  27 -31   18.40    4.09
   1 -27  33  115.80    8.63
  -1  27  33  122.50    9.12
   1  27 -33  114.50    8.71
  -1 -27 -33  126.10    9.12
   1  27  33  129.10    9.19
  -1 -27  33  127.80    9.41
   1 -27 -33  121.80    9.05
  -1  27 -33  130.80    9.38
   1 -27  35  123.50    9.07
   1  27 -35  117.80    8.67
  -1 -27 -35  134.20    9.50
   1  27  35  126.60    9.13
  -1 -27  35  130.00    9.30
   1 -27 -35  113.40    8.40
  -1  27 -35  123.30    8.96
   1 -27  37  194.80   13.12
  -1  27  37  166.50   11.33
   1  27 -37  177.90   11.92
   1  27  37  190.30   12.58
  -1 -27  37  185.00   12.40
   1 -27 -37  170.20   11.46
  -1  27 -37  180.30   11.96
   1 -27  39  289.10   18.16
  -1  27  39  301.00   18.61
   1  27 -39  307.20   19.10
  -1 -27 -39  301.30   18.73
   1  27  39  316.10   19.46
  -1 -27  39  275.20   17.36
   1 -27 -39  281.40   17.63
  -1  27 -39  287.00   18.09
   1 -27  41   24.76    4.21
  -1  27  41   25.63    4.24
   1  27 -41   37.74    4.58
  -1 -27 -41   27.06    4.27
   1  27  41   25.77    4.14
  -1 -27  41   27.73    3.69
   1 -27 -41   30.68    4.31
  -1  27 -41   26.56    4.11
   1 -27  43  321.20   20.12
  -1  27  43  281.60   17.56
   1  27 -43  296.10   18.37
  -1 -27 -43  284.60   17.71
   1  27  43  252.80   15.96
  -1 -27  43  271.80   17.14
   1 -27 -43  288.90   17.94
  -1  27 -43  273.50   17.12
   1 -27  45   55.34    5.28
  -1  27  45   62.42    5.76
  -1 -27 -45   56.34    5.43
   1  27  45   53.58    5.05
  -1 -27  45   60.25    5.58
  -1 -27  45   68.93    6.05
   1 -27 -45   55.50    5.37
  -1  27 -45   57.94    5.61
   1 -27  47  327.90   20.29
  -1  27  47  354.90   21.78
  -1 -27 -47  339.00   20.72
   1  27  47  404.70   24.40
  -1 -27  47  349.80   21.44
  -1 -27  47  344.60   21.14
   1 -27 -47  339.20   20.86
  -1  27 -47  354.80   21.78
   1 -27  49  186.50   12.35
  -1  27  49  183.10   11.90
   1  27  49  209.30   13.30
  -1 -27  49  215.90   13.96
  -1 -27  49  209.70   13.45
   1 -27 -49  187.50   12.31
   1 -27  51   97.05    7.51
   1 -27  51  109.40    7.82
  -1  27  51  101.10    7.77
  -1 -27 -51   99.04    7.26
   1  27  51  102.90    7.61
  -1 -27  51   86.80    6.94
  -1 -27  51   99.83    7.47
   1 -27 -51  101.60    7.66
   1 -27  53   81.63    6.84
   1 -27  53   85.13    6.54
  -1  27  53   91.49    7.07
  -1 -27 -53   80.00    6.35
   1  27  53   77.91    6.33
  -1 -27  53   84.04    6.67
  -1 -27  53   91.25    7.17
   1 -27 -53   98.22    7.65
   1 -27  55   15.37    4.21
   1 -27  55   24.84    4.09
  -1  27  55   23.34    3.97
  -1 -27 -55   23.64    3.81
   1  27  55   22.45    3.43
  -1 -27  55   24.46    4.12
  -1 -27  55   23.66    4.88
   1 -27 -55   21.67    4.78
   1 -27  57   32.96    4.56
   1 -27  57   20.43    4.70
  -1  27  57   20.34    4.37
  -1 -27  57   21.85    4.81
  -1 -27  57   22.81    3.96
   1 -27 -57   28.53    4.57
  -1  29   1 1371.00   80.44
   1  29  -1 1157.00   68.19
  -1 -29  -1 1380.00   81.20
   1  29   1 1352.00   79.44
  -1 -29   1 1378.00   81.07
   1 -29  -1 1333.00   78.48
  -1  29  -1 1265.00   74.54
   1 -29   3  736.10   44.11
  -1  29   3  686.70   41.07
   1  29  -3  656.90   39.60
  -1 -29  -3  778.70   46.69
   1  29   3  768.10   45.88
  -1 -29   3  719.90   43.07
   1 -29  -3  716.50   42.89
  -1  29  -3  732.60   43.96
   1 -29   5  497.00   30.34
  -1  29   5  507.70   31.02
   1  29  -5  530.90   32.41
  -1 -29  -5  604.30   36.79
   1  29   5  504.10   30.77
  -1 -29   5  482.60   29.36
   1 -29  -5  503.70   30.80
  -1  29  -5  511.20   30.99
   1 -29   7   17.99    4.57
  -1  29   7   12.56    3.60
   1  29  -7   12.44    4.73
  -1 -29  -7   11.56    4.92
   1  29   7   11.54    3.36
  -1 -29   7   16.06    4.77
   1 -29  -7    8.95    4.73
  -1  29  -7   17.33    3.83
   1 -29   9  356.40   22.35
  -1  29   9  349.40   21.75
   1  29  -9  337.10   21.28
   1  29   9  370.70   23.13
  -1 -29   9  345.20   21.47
   1 -29  -9  364.10   22.87
  -1  29  -9  354.40   22.14
   1 -29  11   -1.51    4.52
  -1  29  11    3.35    4.01
   1  29 -11    4.07    4.41
  -1 -29 -11   -2.23    4.69
   1  29  11    1.95    4.61
  -1 -29  11    6.50    4.39
   1 -29 -11    5.58    4.46
  -1  29 -11    9.77    4.60
   1 -29  13  424.60   26.01
  -1  29  13  488.10   29.76
   1  29 -13  446.20   27.25
  -1 -29 -13  456.00   27.81
   1  29  13  461.40   28.22
  -1 -29  13  470.00   28.91
   1 -29 -13  469.10   28.72
  -1  29 -13  482.50   29.31
   1 -29  15   83.06    6.83
  -1  29  15   79.96    7.18
   1  29 -15   92.54    8.04
  -1 -29 -15   79.64    7.10
   1  29  15   84.21    6.87
  -1 -29  15   81.47    7.36
   1 -29 -15   81.54    7.31
  -1  29 -15   79.77    7.35
   1 -29  17  199.60   13.30
  -1  29  17  196.00   13.06
   1  29 -17  200.90   13.66
  -1 -29 -17  184.70   12.59
   1  29  17  177.20   11.83
  -1 -29  17  193.90   13.05
   1 -29 -17  181.10   12.39
  -1  29 -17  193.20   13.03
   1 -29  19    5.37    3.24
  -1  29  19   10.12    3.92
   1  29 -19   14.97    4.67
  -1 -29 -19   12.80    4.13
   1  29  19    7.77    4.14
  -1 -29  19    7.94    4.32
   1 -29 -19   12.48    3.43
  -1  29 -19   12.58    4.34
   1 -29  21  489.60   29.81
  -1  29  21  529.20   32.06
   1  29 -21  508.70   30.98
  -1 -29 -21  503.60   30.66
   1  29  21  500.60   30.70
  -1 -29  21  508.90   31.08
   1 -29 -21  496.20   30.14
  -1  29 -21  467.70   28.70
   1 -29  23    4.50    4.77
  -1  29  23    0.74    4.59
   1  29 -23    0.79    4.28
  -1 -29 -23    4.66    4.18
   1  29  23    5.32    3.73
  -1 -29  23    0.69    4.34
   1 -29 -23   -2.75    3.74
  -1  29 -23    7.54    4.34
   1 -29  25   87.33    7.52
  -1  29  25   71.87    6.86
   1  29 -25   70.33    6.86
  -1 -29 -25   82.90    7.19
   1  29  25   78.46    6.73
  -1 -29  25   80.17    6.68
   1 -29 -25   88.36    7.43
  -1  29 -25   78.65    7.21
   1 -29  27    4.62    3.70
  -1  29  27    4.12    3.32
   1  29 -27    0.84    4.20
  -1 -29 -27    2.69    3.35
   1  29  27   -0.70    3.22
  -1 -29  27    4.52    4.33
   1 -29 -27    2.60    3.47
  -1  29 -27    0.90    4.01
   1 -29  29   16.04    4.03
  -1  29  29   17.28    4.20
   1  29 -29    9.39    4.30
  -1 -29 -29   21.18    4.39
   1  29  29   14.88    4.45
  -1 -29  29   20.08    4.21
   1 -29 -29   13.38    4.11
  -1  29 -29   19.60    4.80
   1 -29  31    3.71    3.99
  -1  29  31    2.45    4.05
   1  29 -31    7.99    3.99
  -1 -29 -31    9.26    3.74
   1  29  31    3.87    3.74
  -1 -29  31    1.14    3.83
   1 -29 -31   -2.63    3.95
  -1  29 -31    0.88    3.85
   1 -29  33   57.42    5.70
  -1  29  33   50.24    5.30
   1  29 -33   54.38    5.83
  -1 -29 -33   52.39    5.83
   1  29  33   59.83    5.55
  -1 -29  33   50.24    5.72
   1 -29 -33   51.87    5.73
  -1  29 -33   41.24    5.10
   1 -29  35   68.68    6.43
  -1  29  35   82.74    6.81
   1  29 -35   83.67    7.06
  -1 -29 -35   70.89    6.31
   1  29  35   76.54    6.49
  -1 -29  35   71.83    6.15
   1 -29 -35   74.38    6.56
  -1  29 -35   73.04    6.31
   1 -29  37   -1.90    3.60
  -1  29  37    3.76    3.76
   1  29 -37    8.46    3.73
  -1 -29 -37    7.36    3.57
   1  29  37   -1.29    2.98
  -1 -29  37    0.96    3.20
   1 -29 -37    7.48    3.56
  -1  29 -37    2.41    3.51
   1 -29  39   38.37    4.93
  -1  29  39   40.08    4.84
   1  29 -39   43.20    4.89
  -1 -29 -39   47.83    5.28
   1  29  39   34.49    4.46
  -1 -29  39   30.94    4.30
   1 -29 -39   36.53    4.89
  -1  29 -39   37.08    4.78
   1 -29  41   11.52    4.26
  -1  29  41   10.31    3.75
   1  29 -41   10.86    3.91
  -1 -29 -41    3.95    3.30
   1  29  41    8.40    3.23
  -1 -29  41   21.18    4.30
   1 -29 -41   10.60    3.98
   1 -29  43    4.96    3.95
  -1  29  43    7.07    3.58
   1  29 -43    2.99    3.36
  -1 -29 -43    2.98    3.59
   1  29  43    5.53    3.63
  -1 -29  43    1.07    3.86
   1 -29 -43    4.59    3.75
  -1  29 -43    4.90    3.32
   1 -29  45   13.67    3.79
  -1  29  45   15.87    3.85
  -1 -29 -45   19.48    4.35
   1  29  45   13.25    3.80
  -1 -29  45   14.21    3.86
  -1 -29  45    4.46    3.67
   1 -29 -45   11.95    3.69
  -1  29 -45   14.08    3.56
   1 -29  47    1.78    3.54
  -1  29  47   -1.63    3.25
  -1 -29 -47    1.96    3.71
   1  29  47   -2.84    3.56
  -1 -29  47    2.15    3.50
  -1 -29  47   -0.36    3.50
   1 -29 -47   -1.57    3.74
  -1  29 -47   -0.07    3.54
   1 -29  49    3.37    3.89
  -1  29  49    2.50    3.53
  -1 -29 -49    0.86    3.51
   1  29  49    0.32    3.43
  -1 -29  49    3.52    3.76
  -1 -29  49   11.64    3.69
   1 -29 -49    7.78    4.10
  -1  29 -49    9.37    3.54
   1 -29  51    8.85    3.42
   1 -29  51    3.52    3.67
  -1  29  51    6.24    3.97
  -1 -29 -51   11.81    4.10
   1  29  51    4.64    3.58
  -1 -29  51    2.16    3.65
  -1 -29  51    4.74    3.79
   1 -29 -51    3.90    4.23
   1 -29  53    6.50    3.51
   1 -29  53   -0.07    3.82
  -1  29  53    1.44    3.85
  -1 -29 -53   -4.10    4.08
   1  29  53   -0.95    3.74
  -1 -29  53    1.79    4.28
  -1 -29  53   -3.20    3.77
   1 -29 -53    3.20    3.98
   1 -29  55    6.55    4.11
   1 -29  55    5.24    3.97
  -1  29  55    8.73    4.04
  -1 -29 -55    4.46    3.67
   1  29  55   12.37    3.86
  -1 -29  55    7.65    4.54
  -1 -29  55   10.15    4.16
   1 -29 -55   16.96    4.54
  -1  29  57    6.41    5.35
   1 -31   1   29.16    4.34
  -1  31   1   22.98    4.99
   1  31  -1   23.58    4.42
  -1 -31  -1   22.62    4.08
   1  31   1   19.88    5.34
  -1 -31   1   30.54    4.44
   1 -31  -1   25.27    5.54
  -1  31  -1   21.60    5.33
   1 -31   3   15.57    3.83
  -1  31   3   11.48    3.58
   1  31  -3   11.87    3.77
  -1 -31  -3    6.92    3.52
   1  31   3   12.78    4.80
  -1 -31   3   12.83    4.80
   1 -31  -3   21.25    5.21
  -1  31  -3    8.81    4.52
   1 -31   5   10.18    4.76
  -1  31   5   12.35    4.84
   1  31  -5   14.37    4.48
  -1 -31  -5   15.35    3.83
   1  31   5   14.34    4.88
  -1 -31   5   23.69    4.72
   1 -31  -5   14.84    5.00
  -1  31  -5   14.71    4.27
   1 -31   7   -2.17    3.30
  -1  31   7    5.80    4.33
   1  31  -7   -0.55    4.21
  -1 -31  -7    1.44    3.27
   1  31   7    7.25    4.01
  -1 -31   7    5.47    4.12
   1 -31  -7    5.34    4.67
  -1  31  -7   -0.93    4.49
   1 -31   9   15.34    4.93
  -1  31   9   16.49    4.65
   1  31  -9    7.58    4.19
  -1 -31  -9   13.86    4.59
   1  31   9    3.73    4.66
  -1 -31   9    9.22    4.43
   1 -31  -9   12.84    4.62
  -1  31  -9    8.00    4.81
   1 -31  11   16.26    4.58
  -1  31  11   13.06    3.50
   1  31 -11   21.82    4.13
  -1 -31 -11   16.22    4.62
   1  31  11   23.94    5.12
  -1 -31  11   15.54    4.96
   1 -31 -11   22.22    4.03
  -1  31 -11   25.78    5.09
   1 -31  13   81.26    6.89
  -1  31  13   89.35    7.79
   1  31 -13   73.36    6.86
  -1 -31 -13   94.52    7.40
   1  31  13   85.92    7.38
  -1 -31  13   84.09    7.38
   1 -31 -13   77.92    7.33
  -1  31 -13   87.82    7.14
   1 -31  15    5.36    3.30
  -1  31  15    4.83    4.53
   1  31 -15   13.16    5.64
  -1 -31 -15    2.40    4.27
   1  31  15    9.93    3.28
  -1 -31  15    1.57    3.25
   1 -31 -15   -3.00    3.82
  -1  31 -15    6.18    4.64
   1 -31  17  203.80   13.59
  -1  31  17  207.10   13.85
  -1 -31 -17  195.50   13.13
   1  31  17  210.10   13.84
  -1 -31  17  202.70   13.53
   1 -31 -17  179.20   12.49
  -1  31 -17  187.70   12.65
   1 -31  19   15.52    3.87
  -1  31  19   14.51    4.37
   1  31 -19    8.68    4.50
  -1 -31 -19   11.07    3.62
   1  31  19   11.66    4.53
  -1 -31  19   11.99    3.59
   1 -31 -19   14.94    3.54
  -1  31 -19   13.43    4.77
   1 -31  21  173.80   11.85
  -1  31  21  161.60   11.08
   1  31 -21  156.10   11.11
  -1 -31 -21  178.20   12.30
   1  31  21  168.30   12.12
  -1 -31  21  157.40   11.36
   1 -31 -21  168.50   11.80
  -1  31 -21  160.90   11.41
   1 -31  23    2.30    4.13
  -1  31  23    3.23    3.73
   1  31 -23    1.20    4.37
  -1 -31 -23   -0.49    4.13
   1  31  23   -1.16    3.79
  -1 -31  23    7.77    4.79
   1 -31 -23    3.83    4.30
  -1  31 -23    3.12    3.71
   1 -31  25  551.30   33.41
   1  31 -25  562.00   34.00
  -1 -31 -25  542.60   32.67
   1  31  25  541.20   32.58
  -1 -31  25  536.00   32.56
   1 -31 -25  603.60   36.35
  -1  31 -25  508.30   30.99
   1 -31  27    2.89    3.01
  -1  31  27    5.52    2.99
   1  31 -27    8.78    4.24
  -1 -31 -27    8.87    3.50
   1  31  27    2.47    3.90
  -1 -31  27    9.64    3.25
   1 -31 -27   10.02    4.16
  -1  31 -27    2.53    3.90
   1 -31  29  538.20   32.51
  -1  31  29  533.30   32.41
   1  31 -29  554.60   33.50
  -1 -31 -29  511.90   31.07
  -1 -31  29  551.30   33.46
   1 -31 -29  555.30   33.51
  -1  31 -29  531.00   32.15
   1 -31  31    4.95    4.18
  -1  31  31    6.89    3.59
   1  31 -31   17.21    4.35
  -1 -31 -31   12.80    3.59
   1  31  31    5.05    3.72
  -1 -31  31    9.11    3.66
   1 -31 -31    7.10    3.93
  -1  31 -31    4.05    3.85
   1 -31  33   53.58    5.74
  -1  31  33   67.00    5.70
   1  31 -33   71.36    6.71
  -1 -31 -33   50.14    5.57
   1  31  33   64.59    6.12
  -1 -31  33   66.19    5.68
   1 -31 -33   68.73    6.38
  -1  31 -33   68.55    6.31
   1 -31  35   87.61    6.96
  -1  31  35   80.38    6.73
   1  31 -35   89.71    7.16
  -1 -31 -35   94.99    7.62
   1  31  35   86.67    7.19
  -1 -31  35   81.95    6.93
   1 -31 -35   76.36    6.76
  -1  31 -35   88.53    7.27
   1 -31  37  125.20    9.17
  -1  31  37   99.48    7.72
   1  31 -37  129.40    9.22
   1  31  37  126.30    9.02
  -1 -31  37  118.60    8.77
   1 -31 -37  115.90    8.43
  -1  31 -37  125.20    9.01
   1 -31  39   63.92    6.19
  -1  31  39   66.59    6.11
   1  31 -39   71.03    6.37
  -1 -31 -39   74.69    6.65
   1  31  39   56.75    5.49
  -1 -31  39   63.83    6.15
   1 -31 -39   63.82    5.98
  -1  31 -39   61.62    5.83
   1 -31  41  104.00    8.14
  -1  31  41  103.90    7.93
   1  31 -41   86.11    7.01
   1  31  41  101.00    7.67
  -1 -31  41   90.73    7.47
   1 -31 -41   95.84    7.57
  -1  31 -41   92.55    7.30
   1 -31  43    9.99    3.93
  -1  31  43    7.66    3.93
   1  31 -43   13.09    3.79
  -1 -31 -43   12.61    3.95
   1  31  43   11.80    3.61
  -1 -31  43   11.94    3.84
   1 -31 -43   14.80    3.98
  -1  31 -43   15.68    3.85
   1 -31  45    0.12    3.73
  -1  31  45   -1.29    3.43
   1  31 -45    3.94    3.21
  -1 -31 -45   -0.32    4.11
   1  31  45    9.57    3.49
  -1 -31  45   -3.07    3.73
   1 -31 -45    4.63    3.63
  -1  31 -45   -2.64    3.52
   1 -31  47    0.00    3.70
  -1  31  47    0.67    3.66
  -1 -31 -47    6.82    4.61
   1  31  47    8.09    3.90
  -1 -31  47   -1.78    3.19
  -1 -31  47    0.55    3.48
   1 -31 -47   -1.48    3.87
  -1  31 -47    6.39    3.55
   1 -31  49   26.40    4.47
  -1  31  49   21.26    4.20
  -1 -31 -49   26.36    4.53
   1  31  49   30.50    4.22
  -1 -31  49   24.58    4.30
  -1 -31  49   30.43    4.44
   1 -31 -49   26.37    4.37
  -1  31 -49   34.26    4.85
   1 -31  51   12.31    4.03
   1 -31  51   12.91    3.78
  -1  31  51   -1.73    3.88
  -1 -31 -51    3.50    3.82
   1  31  51    7.19    3.73
  -1 -31  51    8.78    3.75
  -1 -31  51   -0.25    3.85
   1 -31 -51    0.10    4.02
   1 -31  53    7.85    3.78
   1 -31  53    0.61    4.60
  -1  31  53   12.60    3.72
  -1 -31 -53    7.86    4.45
   1  31  53   10.04    4.24
  -1 -31  53    0.96    4.12
  -1 -31  53    6.27    4.44
   1 -31 -53   15.29    4.68
   1 -31  55    6.25    4.76
   1 -31  55   -3.03    4.28
  -1  31  55   -4.40    3.75
   1  31  55    3.94    4.22
  -1 -31  55    7.09    4.03
  -1 -31  55    6.46    4.73
   1 -33   1  153.00   11.49
  -1  33   1  150.60   10.56
   1  33  -1  136.80    9.67
  -1 -33  -1  159.90   11.62
   1  33   1  144.30   10.55
  -1 -33   1  121.60    9.48
   1 -33  -1  154.60   11.39
  -1  33  -1  155.40   11.02
   1 -33   3  438.70   27.03
  -1  33   3  459.50   28.40
   1  33  -3  443.10   27.34
  -1 -33  -3  473.70   29.13
  -1 -33   3  460.40   28.13
   1 -33  -3  495.50   30.35
  -1  33  -3  503.50   30.86
   1 -33   5  157.80   11.52
  -1  33   5  150.60   10.71
   1  33  -5  153.40   11.53
   1  33   5  150.40   10.63
  -1 -33   5  138.20   10.48
   1 -33  -5  135.80   10.19
  -1  33  -5  140.40   10.49
   1 -33   7   99.12    7.91
   1  33  -7   73.02    7.19
  -1 -33  -7   90.59    8.04
   1  33   7   74.22    6.85
  -1 -33   7   75.52    6.58
   1 -33  -7   71.55    6.93
  -1  33  -7   59.44    6.56
   1 -33   9  140.70   10.66
  -1  33   9  134.10    9.44
   1  33  -9  163.30   11.72
  -1 -33  -9  132.20   10.20
   1  33   9  135.10   10.16
  -1 -33   9  151.50   11.29
   1 -33  -9  149.00   11.13
  -1  33  -9  144.40   10.77
   1 -33  11   12.16    4.35
  -1  33  11   18.59    4.55
   1  33 -11   12.02    5.03
  -1 -33 -11   15.19    4.35
   1  33  11   20.16    4.46
  -1 -33  11   15.12    3.91
   1 -33 -11   19.44    5.03
  -1  33 -11   16.76    4.57
   1 -33  13    4.45    3.31
  -1  33  13    7.68    4.86
   1  33 -13    8.75    4.77
  -1 -33 -13    2.27    3.15
   1  33  13    4.96    3.30
  -1 -33  13    0.96    3.27
   1 -33 -13    6.64    4.22
  -1  33 -13   -1.30    3.69
   1 -33  15   20.82    4.03
  -1  33  15   31.13    5.53
   1  33 -15   20.17    4.80
  -1 -33 -15   32.37    5.23
   1  33  15   24.37    3.86
  -1 -33  15   24.16    5.00
   1 -33 -15   25.10    4.04
  -1  33 -15   22.53    5.15
   1 -33  17    9.93    4.20
  -1  33  17    8.37    4.46
   1  33 -17    7.34    3.80
  -1 -33 -17   -1.06    3.88
   1  33  17   -0.16    2.98
  -1 -33  17    2.93    4.43
   1 -33 -17   -1.52    4.55
  -1  33 -17    7.72    4.14
   1 -33  19   27.34    4.33
  -1  33  19   17.25    4.86
   1  33 -19   19.25    4.89
  -1 -33 -19   22.92    4.66
   1  33  19   20.85    4.44
  -1 -33  19   15.31    4.78
   1 -33 -19   23.66    3.98
  -1  33 -19   14.04    4.76
   1 -33  21  126.30    9.32
  -1  33  21  116.10    9.39
   1  33 -21  121.90    9.17
  -1 -33 -21  112.40    8.91
   1  33  21  119.00    9.44
  -1 -33  21  127.00    9.57
   1 -33 -21  122.00    9.35
  -1  33 -21  116.70    8.60
   1 -33  23   30.96    4.76
  -1  33  23   22.57    4.80
   1  33 -23   34.63    5.34
  -1 -33 -23   38.21    5.37
   1  33  23   33.47    5.12
  -1 -33  23   20.44    3.89
   1 -33 -23   25.15    5.05
  -1  33 -23   37.72    5.55
   1 -33  25  118.90    9.20
  -1  33  25  154.70   10.79
   1  33 -25  141.90   10.12
  -1 -33 -25  137.00    9.95
   1  33  25  141.20   10.09
  -1 -33  25  143.00   10.38
   1 -33 -25  128.30    9.58
  -1  33 -25  139.80   10.42
   1 -33  27   22.24    3.95
  -1  33  27   18.34    4.25
   1  33 -27   17.27    4.46
  -1 -33 -27   20.57    4.42
   1  33  27   13.76    4.54
  -1 -33  27   17.18    4.40
   1 -33 -27   19.62    4.37
  -1  33 -27   22.08    4.61
   1 -33  29    2.56    4.32
  -1  33  29    4.23    3.83
   1  33 -29    7.13    4.34
  -1 -33 -29    3.94    3.91
   1  33  29    8.31    4.13
  -1 -33  29    3.09    3.57
   1 -33 -29   -0.55    3.94
  -1  33 -29    1.90    3.88
   1 -33  31   16.83    4.25
  -1  33  31   25.12    4.18
   1  33 -31   20.81    4.66
  -1 -33 -31   18.84    3.83
   1  33  31   20.29    3.88
  -1 -33  31   24.19    4.48
  -1  33 -31   24.40    4.57
   1 -33  33  115.50    8.59
  -1  33  33  129.20    9.44
   1  33 -33  109.00    8.40
  -1 -33 -33  120.40    8.87
   1  33  33  117.00    8.49
  -1 -33  33  116.70    8.80
   1 -33 -33   90.23    7.75
  -1  33 -33  114.40    8.67
   1 -33  35   45.18    5.17
  -1  33  35   47.48    5.46
   1  33 -35   47.55    5.52
  -1 -33 -35   51.72    5.48
   1  33  35   43.47    4.68
  -1 -33  35   45.13    5.02
   1 -33 -35   32.96    5.10
  -1  33 -35   52.45    5.57
   1 -33  37   -2.46    3.96
  -1  33  37    1.39    3.78
   1  33 -37    5.56    4.01
  -1 -33 -37   -2.64    3.71
   1  33  37   -2.38    3.56
  -1 -33  37    3.56    3.36
   1 -33 -37   -0.48    3.61
  -1  33 -37    3.35    3.46
   1 -33  39    2.17    4.22
  -1  33  39    3.28    3.67
   1  33 -39    5.11    3.66
  -1 -33 -39   -1.17    3.90
   1  33  39    0.72    3.63
  -1 -33  39    4.52    3.65
   1 -33 -39    2.18    3.65
  -1  33 -39    2.94    3.63
   1 -33  41   67.36    6.25
  -1  33  41   52.63    5.42
   1  33 -41   61.58    5.86
  -1 -33 -41   57.02    5.81
   1  33  41   65.25    6.04
  -1 -33  41   56.24    5.58
   1 -33 -41   42.68    5.40
  -1  33 -41   61.44    5.74
   1 -33  43    4.38    3.73
  -1  33  43   -2.66    3.58
   1  33 -43   -0.77    3.67
  -1 -33 -43   -1.74    4.04
   1  33  43    6.80    3.72
  -1 -33  43   -0.15    3.84
   1 -33 -43   -1.31    3.87
  -1  33 -43   -3.17    3.46
   1 -33  45  174.00   11.76
  -1  33  45  147.30   10.39
   1  33 -45  158.30   10.92
  -1 -33 -45  153.20   10.76
   1  33  45  175.00   11.84
  -1 -33  45  171.40   11.52
   1 -33 -45  182.00   12.34
  -1  33 -45  163.70   11.10
   1 -33  47    7.84    4.11
  -1  33  47   -1.52    3.65
  -1 -33 -47    8.70    4.60
   1  33  47    2.62    4.09
  -1 -33  47    2.51    3.28
  -1 -33  47    4.76    3.69
   1 -33 -47    4.86    3.82
  -1  33 -47    5.84    3.77
   1 -33  49    1.25    3.72
  -1  33  49   -1.26    3.78
  -1 -33 -49   -2.49    4.20
   1  33  49    0.07    3.97
  -1 -33  49    0.12    3.46
  -1 -33  49    1.44    3.60
   1 -33 -49   -0.43    4.18
  -1  33 -49   -2.02    3.86
   1 -33  51   12.55    4.18
  -1  33  51    4.75    4.33
  -1 -33 -51    1.65    4.09
   1  33  51    8.40    4.31
  -1 -33  51    4.95    4.36
  -1 -33  51   -0.62    3.37
   1 -33 -51   12.79    4.37
  -1  33 -51    6.44    3.64
   1 -33  53   35.92    4.46
   1 -33  53   30.07    5.56
  -1  33  53   38.39    5.10
  -1 -33 -53   42.28    5.47
   1  33  53   38.03    5.43
  -1 -33  53   43.27    5.25
  -1 -33  53   36.57    5.25
   1 -33 -53   37.20    6.24
   1 -35   1  124.20    9.91
  -1  35   1  126.20    9.52
   1  35  -1  140.90   10.21
  -1 -35  -1  162.90   11.30
   1  35   1  130.90    9.44
  -1 -35   1  134.30   10.05
   1 -35  -1  144.10   10.73
  -1  35  -1  136.00   10.23
   1 -35   3  286.50   18.37
  -1  35   3  235.10   15.28
   1  35  -3  298.10   19.16
  -1 -35  -3  272.50   17.61
   1  35   3  286.10   18.64
  -1 -35   3  279.20   18.29
   1 -35  -3  279.40   18.07
  -1  35  -3  254.80   16.47
   1 -35   5  101.90    8.59
  -1  35   5  112.40    9.29
   1  35  -5  106.00    8.54
  -1 -35  -5   91.88    7.94
   1  35   5  115.70    8.72
   1 -35  -5  102.00    8.35
  -1  35  -5  102.20    7.92
   1 -35   7  107.60    8.25
  -1  35   7  100.90    7.90
   1  35  -7   86.88    7.11
  -1 -35  -7  115.10    9.04
  -1 -35   7  117.40    9.52
   1 -35  -7   94.49    8.07
  -1  35  -7   93.36    7.91
   1 -35   9   52.41    6.38
  -1  35   9   54.87    6.27
   1  35  -9   60.62    5.95
  -1 -35  -9   55.06    5.96
   1  35   9   45.23    5.96
  -1 -35   9   45.14    5.11
   1 -35  -9   43.43    5.53
  -1  35  -9   48.71    5.38
  -1  35  11  175.70   12.38
   1  35 -11  164.40   11.49
  -1 -35 -11  162.00   11.14
   1  35  11  171.50   12.10
  -1 -35  11  158.90   11.38
   1 -35 -11  136.60    9.78
  -1  35 -11  178.90   12.16
   1 -35  13   41.26    4.91
  -1  35  13   39.95    5.41
   1  35 -13   37.87    4.64
  -1 -35 -13   27.44    4.70
   1  35  13   37.07    4.65
  -1 -35  13   36.40    5.72
   1 -35 -13   31.75    4.95
  -1  35 -13   39.87    5.23
   1 -35  15  272.10   17.58
  -1  35  15  252.70   16.46
   1  35 -15  251.30   16.25
  -1 -35 -15  274.40   17.70
   1  35  15  270.10   17.11
  -1 -35  15  255.30   16.77
   1 -35 -15  259.30   16.89
  -1  35 -15  257.60   16.86
   1 -35  17   -4.01    3.93
  -1  35  17   -0.09    3.00
   1  35 -17   -2.45    4.41
  -1 -35 -17    2.09    3.92
   1  35  17    5.66    3.26
  -1 -35  17    5.28    4.37
   1 -35 -17    4.51    3.88
  -1  35 -17    5.19    4.14
   1 -35  19   92.39    7.38
  -1  35  19   79.66    6.81
   1  35 -19   86.96    7.64
  -1 -35 -19   92.70    7.85
   1  35  19   84.89    7.45
  -1 -35  19   74.99    7.13
   1 -35 -19   90.30    7.71
  -1  35 -19   87.49    7.67
   1 -35  21   50.65    5.12
  -1  35  21   55.00    6.20
   1  35 -21   52.81    5.51
  -1 -35 -21   56.02    6.14
   1  35  21   43.03    5.81
  -1 -35  21   55.09    6.38
   1 -35 -21   56.54    5.77
  -1  35 -21   46.13    5.53
   1 -35  23    5.08    4.00
  -1  35  23    2.82    4.65
   1  35 -23    6.14    4.38
  -1 -35 -23    2.56    3.55
   1  35  23    3.92    3.82
  -1 -35  23    2.72    4.26
   1 -35 -23    8.61    4.52
  -1  35 -23    3.25    4.32
   1 -35  25  105.40    8.64
  -1  35  25  105.10    7.67
   1  35 -25   94.90    7.56
  -1 -35 -25   83.40    6.62
   1  35  25   91.71    7.35
  -1 -35  25   94.70    7.43
   1 -35 -25   96.60    7.88
  -1  35 -25  101.70    7.99
   1 -35  27    4.45    3.41
  -1  35  27    6.93    4.22
   1  35 -27   -3.41    4.05
  -1 -35 -27    1.37    3.38
   1  35  27    3.07    4.12
  -1 -35  27    4.38    4.18
   1 -35 -27    5.51    4.07
  -1  35 -27    4.52    4.03
   1 -35  29  265.90   17.02
  -1  35  29  254.90   16.43
   1  35 -29  261.90   16.87
  -1 -35 -29  270.40   16.99
   1  35  29  284.70   17.89
  -1 -35  29  283.70   17.99
   1 -35 -29  243.10   15.72
  -1  35 -29  270.60   17.40
   1 -35  31    5.99    3.50
  -1  35  31    6.17    3.85
   1  35 -31    9.52    3.96
  -1 -35 -31    6.32    3.42
   1  35  31   10.07    3.51
  -1 -35  31    6.87    4.16
   1 -35 -31    8.49    4.45
  -1  35 -31   14.58    4.32
   1 -35  33  200.30   13.19
  -1  35  33  186.50   12.60
   1  35 -33  181.80   12.31
  -1 -35 -33  157.50   10.90
   1  35  33  169.70   11.36
  -1 -35  33  187.50   12.25
   1 -35 -33  200.70   13.26
  -1  35 -33  187.30   12.63
   1 -35  35    3.92    3.92
  -1  35  35    1.46    3.16
   1  35 -35    3.70    3.66
  -1 -35 -35    1.63    3.99
   1  35  35   -1.51    3.53
  -1 -35  35   -2.04    3.69
   1 -35 -35    3.20    3.87
  -1  35 -35    1.90    3.75
   1 -35  37    7.21    4.10
  -1  35  37   14.01    4.26
   1  35 -37   12.10    3.92
  -1 -35 -37   16.06    4.36
   1  35  37   14.66    4.04
  -1 -35  37    8.73    4.25
   1 -35 -37   12.46    4.09
  -1  35 -37   11.76    3.82
   1 -35  39   10.72    4.09
  -1  35  39    5.79    3.40
   1  35 -39    5.93    3.80
  -1 -35 -39    9.13    4.13
   1  35  39    5.74    3.72
  -1 -35  39    5.39    4.15
   1 -35 -39    9.76    4.04
  -1  35 -39    6.27    3.74
   1 -35  41   70.11    6.27
  -1  35  41   74.03    6.40
   1  35 -41   77.12    6.80
  -1 -35 -41   79.31    7.18
   1  35  41   93.18    7.45
  -1 -35  41   82.89    6.95
   1 -35 -41   82.33    7.09
  -1  35 -41   77.53    6.65
   1 -35  43   94.22    7.29
  -1  35  43   94.84    7.55
   1  35 -43  102.40    8.02
  -1 -35 -43   83.47    7.25
   1  35  43  105.10    8.06
  -1 -35  43   99.33    7.80
  -1  35 -43   96.89    7.56
   1 -35  45    4.66    3.98
  -1  35  45    4.01    3.63
   1  35 -45    0.25    3.58
  -1 -35 -45    7.29    4.32
   1  35  45   -1.12    4.23
  -1 -35  45    7.24    2.95
   1 -35 -45    6.19    4.38
  -1  35 -45   -1.05    3.83
   1 -35  47    7.47    3.86
  -1  35  47    8.59    4.19
  -1 -35 -47   16.13    4.85
   1  35  47    5.94    4.22
  -1 -35  47    2.55    3.06
  -1 -35  47    8.97    4.13
   1 -35 -47    8.32    4.04
  -1  35 -47   12.79    4.37
   1 -35  49    2.52    3.75
  -1  35  49   -2.16    3.78
  -1 -35 -49    4.59    4.07
   1  35  49   -1.48    3.84
  -1 -35  49    6.26    3.77
  -1 -35  49   -3.33    3.38
   1 -35 -49    9.55    3.84
  -1  35 -49    0.65    4.02
   1 -35  51    8.56    4.24
  -1  35  51    3.02    4.32
  -1 -35 -51    5.94    4.93
   1  35  51   -5.84    4.22
  -1 -35  51    3.60    4.29
  -1 -35  51    6.91    4.21
   1 -35 -51    7.44    4.95
  -1  35 -51    7.73    4.16
   1 -37   1  431.80   26.81
  -1  37   1  380.60   23.40
   1  37  -1  404.80   25.11
  -1 -37  -1  430.90   26.68
   1  37   1  427.00   26.28
  -1 -37   1  431.60   26.73
   1 -37  -1  381.10   23.86
  -1  37  -1  474.40   29.14
   1 -37   3   39.76    5.73
  -1  37   3   46.38    5.98
   1  37  -3   52.33    5.84
  -1 -37  -3   42.20    4.99
   1  37   3   40.75    6.06
  -1 -37   3   53.07    5.56
   1 -37  -3   43.36    5.91
  -1  37  -3   45.64    6.14
   1 -37   5    7.70    4.66
  -1  37   5    9.33    3.72
   1  37  -5    3.22    4.29
  -1 -37  -5    6.47    3.45
   1  37   5    9.40    3.47
  -1 -37   5   17.70    5.16
   1 -37  -5    7.79    4.76
  -1  37  -5    8.34    4.43
   1 -37   7    0.97    4.35
  -1  37   7    8.29    4.80
   1  37  -7    9.82    4.66
  -1 -37  -7    9.82    3.56
   1  37   7   -1.00    4.30
  -1 -37   7    8.59    3.65
   1 -37  -7   -2.37    5.04
  -1  37  -7    6.24    3.93
   1 -37   9    2.84    4.63
  -1  37   9    4.63    4.14
   1  37  -9   12.15    5.03
  -1 -37  -9    4.60    3.30
   1  37   9    3.46    4.59
  -1 -37   9    7.52    4.74
   1 -37  -9    3.96    4.50
  -1  37  -9    4.42    3.86
  -1  37  11   65.45    6.06
   1  37 -11   91.81    8.26
  -1 -37 -11   69.13    6.18
   1  37  11   91.16    7.85
  -1 -37  11   91.23    8.12
   1 -37 -11   94.18    8.07
  -1  37 -11   77.28    6.84
   1 -37  13   86.04    7.33
  -1  37  13   82.64    7.61
   1  37 -13  107.20    9.46
  -1 -37 -13   84.99    7.44
   1  37  13   92.26    7.40
  -1 -37  13   69.99    6.39
   1 -37 -13   79.70    7.21
  -1  37 -13   82.01    7.64
   1 -37  15   46.12    5.01
  -1  37  15   43.36    5.85
   1  37 -15   48.44    6.00
  -1 -37 -15   47.05    5.63
   1  37  15   49.24    4.86
  -1 -37  15   40.12    4.93
   1 -37 -15   43.56    4.80
  -1  37 -15   51.19    6.15
   1 -37  17   39.04    5.04
  -1  37  17   26.68    4.88
   1  37 -17   29.64    4.95
  -1 -37 -17   23.83    4.35
   1  37  17   29.40    4.22
  -1 -37  17   15.95    3.84
   1 -37 -17   25.17    4.70
  -1  37 -17   29.94    4.86
   1 -37  19    4.77    3.37
  -1  37  19    1.29    4.18
   1  37 -19    3.38    3.54
  -1 -37 -19   -2.18    4.39
   1  37  19    2.37    3.95
  -1 -37  19   -0.44    3.10
   1 -37 -19   11.22    4.64
  -1  37 -19    1.72    3.68
   1 -37  21   36.59    5.01
  -1  37  21   39.55    5.47
   1  37 -21   38.62    5.53
  -1 -37 -21   43.75    5.52
   1  37  21   47.80    5.70
  -1 -37  21   38.63    4.53
   1 -37 -21   47.29    5.39
  -1  37 -21   28.87    5.10
   1 -37  23   13.37    4.40
  -1  37  23    8.00    3.80
   1  37 -23   -0.35    3.82
  -1 -37 -23    5.76    4.05
   1  37  23    2.36    4.04
  -1 -37  23    6.24    4.25
   1 -37 -23   12.58    4.65
  -1  37 -23    8.09    3.67
   1 -37  25   -2.68    4.14
  -1  37  25   -5.78    4.10
   1  37 -25   -4.55    4.07
  -1 -37 -25   -1.46    3.85
   1  37  25    0.16    3.44
  -1 -37  25    0.50    4.32
   1 -37 -25   -0.18    3.89
  -1  37 -25    2.95    4.04
   1 -37  27   19.50    3.79
  -1  37  27   18.80    4.43
   1  37 -27   30.93    4.76
  -1 -37 -27   30.66    4.79
   1  37  27   15.87    4.10
  -1 -37  27   20.89    3.77
   1 -37 -27   22.02    4.13
  -1  37 -27   20.19    5.25
   1 -37  29   92.85    7.59
  -1  37  29   92.23    7.65
   1  37 -29   89.69    7.63
  -1 -37 -29   94.67    7.62
   1  37  29   93.09    7.40
  -1 -37  29   98.00    8.02
   1 -37 -29  109.10    8.24
   1 -37  31   -0.84    3.30
  -1  37  31    1.66    3.44
   1  37 -31    1.11    3.65
  -1 -37 -31    5.05    3.94
   1  37  31   -1.97    3.71
  -1 -37  31   -0.06    3.00
   1 -37 -31   -0.80    3.67
  -1  37 -31   -3.96    3.35
   1 -37  33   88.96    7.25
  -1  37  33   77.99    6.75
   1  37 -33   87.99    7.11
  -1 -37 -33   73.98    6.80
   1  37  33   88.27    7.21
   1 -37 -33   80.29    7.30
  -1  37 -33   78.96    6.57
   1 -37  35   12.77    4.46
   1  37 -35   22.81    4.15
  -1 -37 -35   10.71    4.08
   1  37  35   12.82    4.05
  -1 -37  35    6.67    3.61
   1 -37 -35   18.17    4.72
  -1  37 -35   17.90    4.05
   1 -37  37    2.55    3.92
  -1  37  37   -3.94    3.87
   1  37 -37    3.10    3.82
  -1 -37 -37   -3.61    3.91
   1  37  37    4.31    3.67
  -1 -37  37    1.84    2.91
   1 -37 -37   -0.48    4.24
  -1  37 -37   -6.38    3.74
   1 -37  39   82.00    7.26
  -1  37  39   60.28    5.90
   1  37 -39   71.61    6.30
  -1 -37 -39   85.86    7.36
   1  37  39   76.47    6.57
  -1 -37  39   69.80    5.73
   1 -37 -39   68.81    6.53
  -1  37 -39   81.97    6.81
   1 -37  41   40.42    5.34
  -1  37  41   47.65    5.21
   1  37 -41   49.97    5.39
   1  37  41   39.75    5.04
  -1 -37  41   36.04    4.32
   1 -37 -41   47.34    5.57
  -1  37 -41   40.55    5.07
   1 -37  43    0.87    4.10
  -1  37  43    0.29    3.68
   1  37 -43    3.98    3.71
  -1 -37 -43    6.24    4.03
   1  37  43    0.00    4.04
  -1 -37  43    3.55    2.88
   1 -37 -43    7.17    4.13
  -1  37 -43   -0.82    3.73
   1 -37  45   42.20    4.78
  -1  37  45   42.60    5.03
   1  37 -45   40.09    4.92
  -1 -37 -45   41.90    5.00
   1  37  45   52.91    5.57
  -1 -37  45   41.00    5.22
   1 -37 -45   48.45    5.64
  -1  37 -45   47.74    5.28
   1 -37  47    7.42    4.18
  -1  37  47    0.58    4.37
   1  37 -47   12.40    3.82
  -1 -37 -47    9.25    4.53
   1  37  47    6.91    3.88
  -1 -37  47    1.90    4.13
   1 -37 -47   13.71    4.18
  -1  37 -47    9.90    3.97
   1 -37  49    2.08    3.81
  -1  37  49    4.64    4.28
  -1 -37 -49    1.40    4.80
   1  37  49   -2.28    3.95
  -1 -37  49   -2.13    3.54
  -1 -37  49    1.79    4.01
   1 -37 -49    3.13    4.45
  -1  37 -49    2.31    4.47
   1 -39   1  147.50   10.78
  -1  39   1  164.30   11.68
   1  39  -1  174.80   12.18
  -1 -39  -1  170.10   11.89
   1  39   1  152.60   10.96
  -1 -39   1  166.00   11.53
   1 -39  -1  151.90   10.84
  -1  39  -1  167.50   11.73
   1 -39   3  413.00   25.63
  -1  39   3  357.40   22.10
   1  39  -3  346.70   21.72
  -1 -39  -3  387.40   24.18
   1  39   3  401.60   25.08
  -1 -39   3  371.00   23.33
   1 -39  -3  403.20   25.06
  -1  39  -3  408.00   25.28
   1 -39   5  325.60   20.60
  -1  39   5  367.40   23.16
   1  39  -5  290.80   18.76
  -1 -39  -5  285.80   18.42
   1  39   5  292.50   18.51
  -1 -39   5  304.70   19.30
   1 -39  -5  328.50   21.16
  -1  39  -5  267.70   17.27
   1 -39   7  100.90    8.37
   1  39  -7  108.10    8.73
  -1 -39  -7   90.34    7.64
   1  39   7   82.17    7.18
  -1 -39   7   69.70    7.26
   1 -39  -7   87.56    7.53
  -1  39  -7   92.04    8.38
   1 -39   9  592.10   35.84
  -1  39   9  555.60   33.40
   1  39  -9  571.20   34.71
  -1 -39  -9  508.90   30.94
   1  39   9  635.80   38.26
  -1 -39   9  705.80   42.30
   1 -39  -9  562.00   34.00
  -1  39  -9  597.60   36.28
   1 -39  11   89.47    7.84
  -1  39  11   81.99    7.27
   1  39 -11   81.67    7.26
  -1 -39 -11   78.65    7.25
   1  39  11   74.91    6.75
  -1 -39  11   92.54    7.46
   1 -39 -11   72.43    6.87
   1 -39  13    0.08    3.84
  -1  39  13    4.94    4.47
   1  39 -13   -0.86    3.54
  -1 -39 -13   13.01    4.79
   1  39  13   -1.89    3.00
  -1 -39  13    0.34    4.25
   1 -39 -13    2.81    4.17
  -1  39 -13    1.70    4.62
   1 -39  15  178.10   12.11
  -1  39  15  178.00   12.31
   1  39 -15  188.40   12.97
  -1 -39 -15  174.10   12.13
   1  39  15  159.60   10.80
  -1 -39  15  191.70   13.23
   1 -39 -15  172.20   12.01
  -1  39 -15  146.00   10.77
   1 -39  17    4.01    3.36
  -1  39  17    3.05    3.99
   1  39 -17    3.81    4.47
  -1 -39 -17    3.41    3.72
   1  39  17    1.94    3.31
  -1 -39  17   -0.50    4.47
   1 -39 -17    1.30    3.92
  -1  39 -17   -1.67    3.92
   1 -39  19  171.20   11.53
  -1  39  19  170.40   11.98
   1  39 -19  182.50   12.64
  -1 -39 -19  204.80   13.84
   1  39  19  174.20   11.98
  -1 -39  19  160.00   11.48
   1 -39 -19  178.50   11.95
  -1  39 -19  185.20   12.53
   1 -39  21    6.12    3.52
  -1  39  21   10.26    4.89
   1  39 -21    8.80    4.04
  -1 -39 -21    2.87    3.58
   1  39  21   12.17    4.41
  -1 -39  21    4.22    4.31
   1 -39 -21    6.12    4.46
  -1  39 -21   -1.47    4.22
   1 -39  23  172.30   11.93
  -1  39  23  194.70   13.08
   1  39 -23  191.50   12.87
  -1 -39 -23  184.60   12.46
   1  39  23  180.20   12.31
  -1 -39  23  206.30   13.55
   1 -39 -23  181.60   12.24
  -1  39 -23  193.80   13.03
   1 -39  25   55.42    6.09
  -1  39  25   44.23    5.18
   1  39 -25   68.77    6.68
  -1 -39 -25   51.54    5.43
   1  39  25   60.31    5.89
  -1 -39  25   55.52    5.41
   1 -39 -25   66.23    6.45
  -1  39 -25   66.28    6.41
   1 -39  27  241.80   15.56
  -1  39  27  288.80   18.32
   1  39 -27  252.40   16.08
  -1 -39 -27  243.90   15.45
   1  39  27  277.30   17.59
   1 -39 -27  239.10   15.47
  -1  39 -27  243.40   15.54
   1 -39  29   12.72    4.27
  -1  39  29   19.24    3.44
   1  39 -29   16.31    4.43
  -1 -39 -29   20.60    4.09
   1  39  29   14.11    4.09
  -1 -39  29   10.46    3.49
   1 -39 -29   11.58    3.83
  -1  39 -29   24.94    4.61
   1 -39  31  194.30   12.79
  -1  39  31  197.40   13.28
   1  39 -31  184.50   12.47
  -1 -39 -31  188.60   12.51
   1  39  31  173.00   11.54
  -1 -39  31  188.50   12.77
  -1  39 -31  190.40   12.71
   1 -39  33    6.21    4.30
  -1  39  33    3.62    3.97
   1  39 -33    7.72    3.77
  -1 -39 -33   11.01    3.71
   1  39  33    4.71    3.94
  -1 -39  33   10.94    3.33
   1 -39 -33   -0.24    3.96
  -1  39 -33    6.43    3.89
   1 -39  35   91.05    7.43
  -1  39  35   85.77    6.94
   1  39 -35  100.30    7.88
  -1 -39 -35  108.80    8.33
   1  39  35   81.53    6.86
  -1 -39  35  106.60    8.46
   1 -39 -35   97.10    7.78
  -1  39 -35   88.38    7.12
   1 -39  37   73.69    6.96
  -1  39  37   73.95    6.30
   1  39 -37   76.35    6.40
  -1 -39 -37   79.94    7.05
   1  39  37   64.46    6.09
  -1 -39  37   66.34    6.44
   1 -39 -37   71.01    6.83
  -1  39 -37   67.99    6.06
   1 -39  39    7.30    4.05
  -1  39  39    9.82    4.02
   1  39 -39    9.91    3.93
  -1 -39 -39    9.80    4.48
   1  39  39    6.63    4.21
  -1 -39  39   16.11    4.18
   1 -39 -39   11.70    4.22
  -1  39 -39   13.11    3.97
   1 -39  41    0.79    3.71
  -1  39  41    1.29    3.55
   1  39 -41    1.24    3.56
  -1 -39 -41   -2.03    4.50
   1  39  41   -6.83    4.13
  -1 -39  41   -1.60    3.90
   1 -39 -41   -1.62    3.76
  -1  39 -41    4.13    3.73
   1 -39  43    5.34    4.21
  -1  39  43    0.82    3.83
   1  39 -43    0.30    3.63
  -1 -39 -43   -2.22    4.09
   1  39  43    1.16    3.85
  -1 -39  43    6.33    4.10
   1 -39 -43    8.03    4.08
  -1  39 -43    2.01    3.67
   1 -39  45    4.66    4.17
  -1  39  45    1.81    3.82
   1  39 -45   -1.87    3.54
  -1 -39 -45    0.00    4.03
   1  39  45    4.51    4.24
  -1 -39  45    2.70    4.01
   1 -39 -45    4.33    3.90
  -1  39 -45    4.17    3.83
  -1  39  47   11.87    4.50
   1  39  47    6.55    4.61
   1 -41   1   17.83    4.71
  -1  41   1    9.26    3.38
   1  41  -1    9.47    4.12
  -1 -41  -1   10.58    3.48
   1  41   1    5.95    4.13
  -1 -41   1    0.90    4.58
   1 -41  -1   18.93    4.84
  -1  41  -1    8.42    4.71
   1 -41   3   25.32    5.32
  -1  41   3   21.84    4.65
   1  41  -3   18.03    4.61
  -1 -41  -3   22.96    3.97
   1  41   3   21.78    4.78
  -1 -41   3   17.14    3.81
   1 -41  -3   16.70    5.78
  -1  41  -3   17.41    4.12
   1 -41   5   23.02    4.71
  -1  41   5   28.76    4.15
   1  41  -5   27.61    5.12
  -1 -41  -5   27.20    5.08
   1  41   5   19.53    3.90
  -1 -41   5   21.24    5.13
   1 -41  -5   19.79    4.56
  -1  41  -5   23.37    4.00
   1 -41   7  114.10    8.94
  -1  41   7  146.60   10.81
   1  41  -7  147.70   10.57
  -1 -41  -7  141.30   10.51
   1  41   7  128.80    9.72
  -1 -41   7  141.90    9.98
   1 -41  -7  129.70    9.36
  -1  41  -7  136.20   10.20
   1 -41   9    1.99    4.50
  -1  41   9    8.61    4.05
   1  41  -9   -1.89    3.19
  -1 -41  -9   -2.60    4.41
   1  41   9    0.13    4.13
  -1 -41   9    0.87    4.03
   1 -41  -9    0.95    3.22
  -1  41  -9    2.94    4.43
   1 -41  11  106.40    8.44
  -1  41  11  100.00    7.69
   1  41 -11   97.82    7.58
  -1 -41 -11   85.48    7.52
   1  41  11   94.60    7.78
  -1 -41  11   89.81    7.87
   1 -41 -11   99.95    7.72
  -1  41 -11   79.34    7.28
   1 -41  13   37.53    5.18
  -1  41  13   32.06    4.50
   1  41 -13   21.83    4.53
  -1 -41 -13   35.51    5.52
   1  41  13   33.83    4.36
  -1 -41  13   27.81    4.78
   1 -41 -13   30.59    4.22
  -1  41 -13   31.38    5.33
   1 -41  15  123.00    9.12
  -1  41  15  106.70    8.47
   1  41 -15  138.20   10.10
  -1 -41 -15  121.30    9.08
   1  41  15  115.70    8.32
  -1 -41  15  134.70    9.57
   1 -41 -15  108.80    8.10
  -1  41 -15  123.90    9.25
   1 -41  17    6.07    3.69
  -1  41  17    8.51    3.78
   1  41 -17    8.77    4.03
  -1 -41 -17   12.82    4.20
   1  41  17   15.04    4.13
  -1 -41  17   13.72    3.54
   1 -41 -17    9.34    4.28
  -1  41 -17   10.50    4.25
   1 -41  19   83.08    7.25
  -1  41  19   65.64    5.72
   1  41 -19   72.45    6.61
   1  41  19   77.99    6.90
  -1 -41  19   80.83    6.56
   1 -41 -19   73.70    6.94
  -1  41 -19   74.22    6.48
   1 -41  21  165.60   11.33
  -1  41  21  197.10   13.20
   1  41 -21  163.10   11.41
  -1 -41 -21  151.90   10.58
   1  41  21  175.90   12.00
  -1 -41  21  147.30   10.49
   1 -41 -21  149.10   10.28
  -1  41 -21  155.70   11.03
   1 -41  23   75.05    6.91
   1  41 -23   54.01    6.00
  -1 -41 -23   71.07    6.76
   1  41  23   69.05    6.68
  -1 -41  23   64.64    6.58
   1 -41 -23   67.39    6.60
  -1  41 -23   64.90    6.28
   1 -41  25   44.50    5.54
  -1  41  25   42.39    5.51
   1  41 -25   46.21    5.26
  -1 -41 -25   35.90    4.36
   1  41  25   38.70    4.79
  -1 -41  25   45.58    5.91
   1 -41 -25   38.12    4.96
  -1  41 -25   39.04    4.99
   1 -41  27   57.73    5.70
  -1  41  27   54.40    5.40
   1  41 -27   46.14    5.56
  -1 -41 -27   60.43    6.06
   1  41  27   61.19    6.13
  -1 -41  27   56.87    5.36
   1 -41 -27   71.79    6.87
  -1  41 -27   52.64    5.60
   1 -41  29   21.80    4.85
  -1  41  29    3.78    4.12
   1  41 -29   19.06    4.12
  -1 -41 -29   17.64    4.42
   1  41  29   13.99    3.82
  -1 -41  29   12.72    4.52
   1 -41 -29    2.11    3.91
  -1  41 -29   14.20    4.19
   1 -41  31   82.31    6.90
  -1  41  31   82.72    6.68
   1  41 -31   73.75    6.49
  -1 -41 -31   76.25    6.76
   1  41  31  106.40    7.97
  -1 -41  31   81.80    6.67
  -1  41 -31   77.97    6.53
   1 -41  33   29.80    5.14
  -1  41  33   32.65    4.51
   1  41 -33   24.16    3.79
  -1 -41 -33   36.19    5.10
   1  41  33   34.80    4.92
  -1 -41  33   34.79    5.20
   1 -41 -33   29.00    4.71
  -1  41 -33   37.43    4.74
   1 -41  35  190.70   12.91
  -1  41  35  194.50   12.97
   1  41 -35  180.90   12.11
  -1 -41 -35  155.60   10.97
   1  41  35  175.30   11.82
  -1 -41  35  177.80   11.93
   1 -41 -35  176.60   12.00
  -1  41 -35  181.70   12.19
   1 -41  37   11.00    4.15
  -1  41  37   20.50    4.53
   1  41 -37   13.59    4.09
  -1 -41 -37   23.98    4.49
   1  41  37    9.69    4.38
  -1 -41  37   10.16    3.71
   1 -41 -37   16.07    4.42
  -1  41 -37   14.37    3.97
   1 -41  39  110.00    7.92
  -1  41  39  122.30    8.94
   1  41 -39  101.10    7.65
  -1 -41 -39  112.00    8.27
   1  41  39   99.62    7.73
  -1 -41  39  108.30    8.18
   1 -41 -39  101.00    7.88
  -1  41 -39  109.00    8.24
   1 -41  41   -3.87    2.80
  -1  41  41   -2.57    3.91
   1  41 -41   -0.89    3.68
  -1 -41 -41   -4.30    4.30
   1  41  41    6.56    3.97
  -1 -41  41    7.48    4.26
   1 -41 -41   -2.52    3.65
  -1  41 -41   -3.00    3.79
   1 -41  43   17.81    4.01
  -1  41  43   20.49    4.07
   1  41 -43   18.58    4.54
  -1 -41 -43   14.05    4.90
   1  41  43   15.21    4.29
  -1 -41  43    6.60    3.87
   1 -41 -43   16.54    4.46
  -1  41 -43   17.66    4.10
   1 -43   1    0.44    3.12
  -1  43   1    3.88    4.47
   1  43  -1    5.02    3.78
  -1 -43  -1    3.25    4.53
   1  43   1    0.63    3.94
  -1 -43   1   -1.29    3.09
   1 -43  -1    0.75    4.34
  -1  43  -1   -2.96    3.13
   1 -43   3   -1.95    4.48
  -1  43   3    6.72    3.11
   1  43  -3   -0.30    4.20
  -1 -43  -3   -6.08    3.95
   1  43   3    5.61    3.98
  -1 -43   3   -5.79    4.26
   1 -43  -3    1.98    4.31
  -1  43  -3    5.51    4.21
   1 -43   5   37.18    5.24
  -1  43   5   28.02    4.98
   1  43  -5   34.42    5.11
  -1 -43  -5   30.63    4.24
   1  43   5   23.78    4.73
  -1 -43   5   25.81    4.10
   1 -43  -5   29.60    4.30
  -1  43  -5   29.89    5.02
   1 -43   7   18.52    4.66
  -1  43   7   18.68    3.82
   1  43  -7   17.83    4.08
  -1 -43  -7   23.57    3.92
   1  43   7   20.98    4.66
  -1 -43   7   28.36    5.24
   1 -43  -7   13.71    3.61
  -1  43  -7   16.79    3.72
   1 -43   9   -1.16    4.41
  -1  43   9    3.37    3.90
   1  43  -9   15.14    4.51
  -1 -43  -9    6.09    3.93
   1  43   9    2.47    4.00
  -1 -43   9    1.17    4.01
   1 -43  -9    2.67    4.05
  -1  43  -9   -1.56    2.89
   1 -43  11   15.13    4.55
  -1  43  11   11.89    4.17
   1  43 -11   25.28    4.84
  -1 -43 -11   23.23    4.82
   1  43  11   24.35    4.39
  -1 -43  11   12.72    3.61
   1 -43 -11    9.37    4.58
  -1  43 -11   20.61    4.53
   1 -43  13   55.57    5.58
  -1  43  13   54.52    6.11
   1  43 -13   69.95    6.88
  -1 -43 -13   64.74    6.43
   1  43  13   64.52    6.12
  -1 -43  13   58.08    6.00
   1 -43 -13   66.70    6.64
  -1  43 -13   65.87    6.33
   1 -43  15  129.50    9.51
  -1  43  15  142.90   10.42
   1  43 -15  129.50    9.72
  -1 -43 -15  119.30    9.03
   1  43  15  133.20    9.36
  -1 -43  15  141.00   10.25
   1 -43 -15  136.20    9.97
  -1  43 -15  132.90    9.70
   1 -43  17   81.91    7.10
  -1  43  17   80.83    6.97
   1  43 -17   82.49    7.30
  -1 -43 -17   82.52    7.07
   1  43  17   72.24    6.35
  -1 -43  17   79.19    7.21
   1 -43 -17   72.00    6.13
  -1  43 -17   69.95    6.15
   1 -43  19  178.90   12.20
  -1  43  19  186.10   12.62
   1  43 -19  200.50   13.48
  -1 -43 -19  231.20   15.56
   1  43  19  186.90   12.74
  -1 -43  19  192.00   13.04
   1 -43 -19  206.80   13.70
  -1  43 -19  169.40   11.59
   1 -43  21    9.52    4.25
  -1  43  21   18.92    4.89
   1  43 -21    8.63    3.86
  -1 -43 -21   10.07    3.89
   1  43  21    8.42    4.07
  -1 -43  21   12.94    4.18
   1 -43 -21    5.23    4.31
  -1  43 -21    9.90    4.41
   1 -43  23  220.20   14.65
  -1  43  23  210.40   13.52
   1  43 -23  212.70   13.85
  -1 -43 -23  234.60   15.27
   1  43  23  220.70   14.29
  -1 -43  23  209.50   13.59
   1 -43 -23  236.00   15.27
  -1  43 -23  227.10   14.75
   1 -43  25   38.90    5.51
  -1  43  25   41.05    5.08
   1  43 -25   49.24    5.58
  -1 -43 -25   27.89    4.45
   1  43  25   41.66    4.80
  -1 -43  25   42.79    5.13
   1 -43 -25   36.79    5.23
  -1  43 -25   35.62    4.08
   1 -43  27  233.70   14.99
  -1  43  27  219.20   14.32
   1  43 -27  227.20   14.65
  -1 -43 -27  241.70   15.69
  -1 -43  27  244.30   16.01
   1 -43 -27  207.20   13.65
  -1  43 -27  254.60   16.26
   1 -43  29   57.81    6.06
  -1  43  29   55.85    5.46
   1  43 -29   46.75    5.24
  -1 -43 -29   41.62    4.96
   1  43  29   51.52    5.36
  -1 -43  29   45.64    4.74
   1 -43 -29   45.57    5.59
  -1  43 -29   41.46    5.15
   1 -43  31  144.50    9.99
  -1  43  31  177.00   11.94
   1  43 -31  172.10   11.70
  -1 -43 -31  152.10   10.50
   1  43  31  162.30   10.85
  -1 -43  31  148.10   10.41
   1 -43 -31  165.30   11.32
  -1  43 -31  151.20   10.63
   1 -43  33    1.99    4.16
  -1  43  33    4.87    3.93
   1  43 -33    1.48    3.70
  -1 -43 -33   -3.56    4.00
   1  43  33    6.02    3.97
  -1 -43  33    3.41    2.85
   1 -43 -33    2.56    4.41
  -1  43 -33    2.63    3.81
   1 -43  35   20.80    4.45
  -1  43  35   27.12    4.15
   1  43 -35   26.50    4.14
  -1 -43 -35   30.81    4.72
   1  43  35   27.75    4.99
  -1 -43  35   17.48    4.49
   1 -43 -35   30.91    4.80
  -1  43 -35   26.94    4.18
   1 -43  37    2.68    2.96
  -1  43  37   -1.49    3.51
   1  43 -37   -3.72    3.86
  -1 -43 -37    4.47    4.26
   1  43  37   -5.92    3.81
  -1 -43  37   -0.57    3.98
   1 -43 -37    1.81    3.81
  -1  43 -37    7.15    3.73
   1 -43  39    8.16    3.44
  -1  43  39    8.27    3.74
   1  43 -39    7.14    4.01
  -1 -43 -39    1.89    4.35
   1  43  39   10.00    4.06
  -1 -43  39    4.80    3.03
   1 -43 -39    5.06    3.99
  -1  43 -39    4.68    3.75
   1 -43  41    5.81    3.40
  -1  43  41    6.18    4.29
   1  43 -41   14.30    4.71
   1  43  41   12.91    3.93
  -1 -43  41    1.96    2.89
   1 -43 -41    0.88    4.23
  -1  43 -41    3.95    4.11
   1 -45   1   41.52    4.70
  -1  45   1   45.70    5.54
   1  45  -1   38.01    4.99
  -1 -45  -1   49.30    5.03
   1  45   1   42.45    5.45
  -1 -45   1   30.76    5.16
   1 -45  -1   46.10    5.74
  -1  45  -1   40.12    5.19
   1 -45   3   43.48    5.62
  -1  45   3   35.45    5.18
   1  45  -3   38.86    5.13
  -1 -45  -3   29.21    5.02
   1  45   3   33.05    4.63
  -1 -45   3   28.89    4.15
   1 -45  -3   33.46    5.04
  -1  45  -3   33.29    4.15
   1 -45   5   16.71    3.81
  -1  45   5   13.90    3.27
   1  45  -5   23.07    4.49
  -1 -45  -5   15.13    4.36
   1  45   5   20.89    4.51
  -1 -45   5   19.16    4.76
   1 -45  -5    9.83    3.36
  -1  45  -5   11.01    4.56
   1 -45   7  222.00   14.65
  -1  45   7  239.80   15.66
   1  45  -7  218.40   14.10
  -1 -45  -7  227.30   14.82
  -1 -45   7  234.70   15.03
   1 -45  -7  216.50   14.18
  -1  45  -7  244.40   15.75
   1 -45   9   13.91    4.91
  -1  45   9   15.76    4.60
   1  45  -9   19.27    4.33
  -1 -45  -9   13.07    3.90
   1  45   9   13.00    4.30
  -1 -45   9   16.33    4.50
   1 -45  -9    8.51    4.59
  -1  45  -9   18.08    4.02
   1 -45  11  482.10   29.44
  -1  45  11  466.70   28.30
   1  45 -11  538.80   32.52
  -1 -45 -11  524.00   31.67
   1  45  11  529.20   31.92
  -1 -45  11  462.70   28.30
   1 -45 -11  487.50   29.69
  -1  45 -11  461.60   28.07
   1 -45  13   16.36    4.64
  -1  45  13    8.48    3.09
   1  45 -13   14.26    4.54
  -1 -45 -13   15.57    4.42
   1  45  13   13.94    3.97
  -1 -45  13   11.64    4.13
   1 -45 -13    6.97    4.46
  -1  45 -13   14.13    3.32
   1 -45  15  162.00   11.20
  -1  45  15  148.40   10.20
   1  45 -15  149.00   10.40
  -1 -45 -15  153.00   10.62
   1  45  15  184.80   12.20
  -1 -45  15  164.40   11.18
   1 -45 -15  166.70   11.62
  -1  45 -15  169.90   11.46
   1 -45  17    4.70    3.79
  -1  45  17    6.72    3.08
   1  45 -17    9.37    4.10
  -1 -45 -17   12.21    4.44
   1  45  17    8.93    3.99
  -1 -45  17    2.51    3.16
   1 -45 -17    5.56    4.19
  -1  45 -17    8.23    3.14
   1 -45  19  251.20   16.21
  -1  45  19  234.50   14.85
   1  45 -19  249.50   15.92
  -1 -45 -19  277.60   17.78
   1  45  19  264.10   16.74
  -1 -45  19  252.70   16.03
   1 -45 -19  242.50   15.46
  -1  45 -19  236.00   15.09
   1 -45  21   47.89    5.55
  -1  45  21   46.75    5.23
   1  45 -21   47.05    5.48
  -1 -45 -21   51.54    5.44
   1  45  21   30.15    4.79
  -1 -45  21   49.11    5.45
   1 -45 -21   40.99    4.97
  -1  45 -21   52.29    5.60
   1 -45  23  176.90   12.20
  -1  45  23  178.70   12.12
   1  45 -23  162.00   11.13
  -1 -45 -23  166.00   11.36
   1  45  23  170.50   11.47
  -1 -45  23  163.40   11.41
   1 -45 -23  180.70   12.34
  -1  45 -23  197.30   13.57
   1 -45  25   45.30    5.61
  -1  45  25   59.83    5.97
   1  45 -25   52.08    5.43
  -1 -45 -25   62.35    6.24
   1  45  25   55.78    5.63
  -1 -45  25   64.94    6.19
   1 -45 -25   55.87    5.78
  -1  45 -25   43.15    4.93
   1 -45  27   20.73    3.66
  -1  45  27   20.44    3.94
   1  45 -27   17.99    4.25
  -1 -45 -27   20.82    4.40
   1  45  27   17.73    4.16
  -1 -45  27   25.66    3.87
   1 -45 -27   24.96    4.57
  -1  45 -27   12.03    4.25
   1 -45  29   -0.92    4.61
  -1  45  29    2.87    4.00
   1  45 -29   -4.64    4.06
  -1 -45 -29   -0.49    3.43
   1  45  29   -0.18    3.76
  -1 -45  29   -5.01    3.92
   1 -45 -29    2.77    3.60
  -1  45 -29    0.24    3.91
   1 -45  31   53.59    5.25
  -1  45  31   54.35    5.48
   1  45 -31   55.96    5.30
  -1 -45 -31   46.64    5.57
   1  45  31   51.92    5.20
  -1 -45  31   48.64    5.31
   1 -45 -31   36.13    5.20
  -1  45 -31   56.30    5.85
   1 -45  33   13.03    4.29
  -1  45  33    7.03    3.56
   1  45 -33   11.49    4.12
  -1 -45 -33   17.42    4.49
   1  45  33   11.41    4.28
  -1 -45  33   14.35    4.45
   1 -45 -33   12.34    4.05
  -1  45 -33   15.00    4.08
   1 -45  35   40.34    5.07
  -1  45  35   29.31    4.74
   1  45 -35   43.22    4.85
  -1 -45 -35   40.87    5.24
   1  45  35   29.84    4.73
  -1 -45  35   36.28    4.19
   1 -45 -35   34.69    5.02
  -1  45 -35   33.83    4.61
   1 -45  37    8.26    3.19
  -1  45  37    3.17    3.86
   1  45 -37    5.85    3.46
  -1 -45 -37   12.73    4.50
   1  45  37   13.80    4.13
  -1 -45  37    4.50    4.05
   1 -45 -37   15.11    4.70
  -1  45 -37    9.39    4.03
   1 -47   1   52.57    5.16
  -1  47   1   61.69    5.54
   1  47  -1   58.27    5.34
  -1 -47  -1   57.08    5.89
   1  47   1   62.30    6.21
  -1 -47   1   71.06    6.44
   1 -47  -1   63.72    6.38
  -1  47  -1   63.05    6.25
   1 -47   3   26.40    4.93
  -1  47   3   24.85    4.59
   1  47  -3   36.07    5.31
  -1 -47  -3   34.05    4.24
   1  47   3   32.89    4.82
  -1 -47   3   22.51    4.33
   1 -47  -3   25.70    4.55
  -1  47  -3   31.50    5.06
   1 -47   5   28.03    4.71
  -1  47   5   36.30    5.24
   1  47  -5   21.73    4.45
  -1 -47  -5   28.57    5.12
   1  47   5   37.48    4.14
  -1 -47   5   27.56    4.54
   1 -47  -5   28.42    4.00
  -1  47  -5   32.49    3.98
   1 -47   7   14.79    4.01
  -1  47   7   14.79    3.32
   1  47  -7    8.78    3.44
  -1 -47  -7   13.05    4.60
   1  47   7   16.68    4.37
  -1 -47   7   10.69    4.57
   1 -47  -7   14.36    4.20
  -1  47  -7   16.03    4.58
   1 -47   9   69.97    6.67
  -1  47   9   55.26    5.58
   1  47  -9   67.88    6.38
  -1 -47  -9   68.70    6.64
   1  47   9   62.29    6.32
  -1 -47   9   67.80    5.98
   1 -47  -9   76.80    6.89
  -1  47  -9   64.96    6.40
   1 -47  11   25.00    5.53
   1  47 -11   12.66    4.17
  -1 -47 -11   19.20    4.49
   1  47  11   14.57    4.26
  -1 -47  11   12.49    3.50
   1 -47 -11   18.14    4.43
  -1  47 -11   12.23    3.57
   1 -47  13    3.84    4.31
  -1  47  13    0.20    4.14
   1  47 -13   -3.65    3.14
  -1 -47 -13   -1.27    3.98
   1  47  13    2.24    3.90
  -1 -47  13   -1.36    3.74
   1 -47 -13    0.38    3.87
  -1  47 -13   -7.00    3.45
   1 -47  15    6.97    4.21
  -1  47  15   -4.20    3.88
   1  47 -15    2.40    3.46
  -1 -47 -15    4.58    4.11
   1  47  15    3.86    3.93
  -1 -47  15   -1.50    4.20
   1 -47 -15   -1.38    3.87
  -1  47 -15    3.19    2.92
   1 -47  17    5.09    4.38
  -1  47  17    7.84    4.17
   1  47 -17   14.48    3.63
  -1 -47 -17    8.35    4.20
   1  47  17   13.30    4.26
  -1 -47  17    9.80    4.38
   1 -47 -17    7.01    4.29
  -1  47 -17   15.71    3.97
   1 -47  19    1.33    4.27
  -1  47  19   12.22    4.40
   1  47 -19    3.14    3.52
  -1 -47 -19    5.31    4.32
   1  47  19   -5.51    3.99
  -1 -47  19   -1.85    3.99
   1 -47 -19    3.13    4.21
  -1  47 -19    1.43    3.51
   1 -47  21   11.96    4.97
  -1  47  21   17.05    4.35
   1  47 -21   26.44    4.18
  -1 -47 -21   19.69    4.10
   1  47  21   17.23    4.03
  -1 -47  21   23.86    4.14
   1 -47 -21   18.98    4.42
  -1  47 -21   22.29    4.76
   1 -47  23    7.94    4.25
  -1  47  23    8.93    2.86
   1  47 -23    8.21    3.96
  -1 -47 -23    4.50    3.50
   1  47  23    6.86    2.84
  -1 -47  23    5.25    2.90
   1 -47 -23    3.99    3.96
  -1  47 -23   -5.98    4.16
   1 -47  25    2.46    3.67
  -1  47  25    7.64    3.77
   1  47 -25    7.62    4.10
  -1 -47 -25    4.66    4.04
   1  47  25    8.21    3.94
  -1 -47  25    2.59    2.91
   1 -47 -25    5.27    3.96
  -1  47 -25    1.35    3.91
   1 -47  27   -2.81    3.58
  -1  47  27    3.25    3.87
   1  47 -27    4.52    3.93
  -1 -47 -27   -2.71    3.38
   1  47  27    0.46    3.31
  -1 -47  27   -0.21    4.14
   1 -47 -27    6.18    3.85
  -1  47 -27    3.50    3.09
   1 -47  29   11.26    4.26
  -1  47  29   15.56    3.70
   1  47 -29   10.55    3.70
  -1 -47 -29   20.73    4.37
   1  47  29    9.20    3.95
  -1 -47  29   15.50    3.29
   1 -47 -29   10.96    4.25
  -1  47 -29   12.24    4.11
   1 -47  31   -0.32    2.81
  -1  47  31    7.67    3.53
   1  47 -31   -0.51    3.82
  -1 -47 -31    0.89    4.07
   1  47  31   -2.29    3.02
  -1 -47  31   -2.59    3.81
   1 -47 -31   -2.33    3.62
  -1  47 -31   -5.35    2.92
   1 -47  33   -5.70    3.89
  -1  47  33   -2.66    3.65
   1  47 -33    3.24    3.69
  -1 -47 -33    0.70    3.92
   1  47  33    3.43    3.91
  -1 -47  33   -2.18    3.51
   1 -47 -33    5.69    4.96
  -1  47 -33   -2.63    3.53
   1 -49   1   88.46    6.89
  -1  49   1   73.46    6.88
   1  49  -1   87.60    7.00
  -1 -49  -1   85.03    7.40
   1  49   1  100.70    7.83
  -1 -49   1   82.52    6.80
   1 -49  -1   93.31    7.67
  -1  49  -1   94.14    7.20
   1 -49   3    2.69    4.11
  -1  49   3    3.20    3.15
   1  49  -3    2.70    4.30
  -1 -49  -3    0.34    3.88
   1  49   3    0.81    4.07
  -1 -49   3    0.75    3.82
   1 -49  -3    1.63    3.97
  -1  49  -3   -1.69    4.01
   1 -49   5   11.83    4.23
  -1  49   5    7.23    3.64
   1  49  -5   -3.73    3.54
  -1 -49  -5    7.59    3.87
   1  49   5    8.76    3.21
  -1 -49   5    0.77    3.57
   1 -49  -5    1.50    2.98
  -1  49  -5   -0.53    3.79
   1 -49   7   -0.38    2.99
  -1  49   7    0.93    4.12
   1  49  -7    5.69    3.91
  -1 -49  -7    1.14    3.88
   1  49   7   -4.27    3.68
  -1 -49   7   -1.87    2.90
   1 -49  -7    7.58    4.25
  -1  49  -7   -3.08    2.72
   1 -49   9    4.53    4.07
  -1  49   9   12.27    4.06
   1  49  -9    6.90    4.15
  -1 -49  -9    6.80    4.37
   1  49   9    8.18    4.10
  -1 -49   9    4.91    4.15
   1 -49  -9    8.17    4.25
  -1  49  -9   14.91    4.51
   1 -49  11   64.77    6.50
  -1  49  11   65.88    5.59
   1  49 -11   60.39    5.94
  -1 -49 -11   73.16    6.68
   1  49  11   53.28    5.92
  -1 -49  11   53.69    5.65
   1 -49 -11   61.88    5.95
  -1  49 -11   71.95    6.53
   1 -49  13  156.00   10.92
  -1  49  13  163.40   10.76
   1  49 -13  163.60   10.98
  -1 -49 -13  174.00   12.30
   1  49  13  156.90   10.78
  -1 -49  13  162.70   10.97
   1 -49 -13  152.40   10.30
  -1  49 -13  175.30   11.78
   1 -49  15   -0.82    4.06
  -1  49  15    1.31    2.60
   1  49 -15   -2.81    3.37
  -1 -49 -15    2.17    4.14
   1  49  15    8.67    4.15
  -1 -49  15    4.18    2.99
   1 -49 -15    0.71    2.94
  -1  49 -15    1.96    3.62
   1 -49  17   44.03    5.32
  -1  49  17   41.13    4.10
   1  49 -17   41.67    4.76
  -1 -49 -17   55.29    5.80
   1  49  17   30.60    4.82
  -1 -49  17   42.89    4.55
   1 -49 -17   43.42    4.98
  -1  49 -17   42.34    4.86
   1 -49  19   14.42    4.25
  -1  49  19   21.79    3.63
   1  49 -19   17.05    4.04
  -1 -49 -19    5.40    4.16
   1  49  19   12.88    4.27
  -1 -49  19   20.95    3.53
   1 -49 -19    7.82    4.09
  -1  49 -19   16.93    4.06
   1 -49  21   58.56    5.79
  -1  49  21   55.65    5.37
   1  49 -21   60.21    5.62
  -1 -49 -21   56.91    5.36
   1  49  21   59.51    5.41
  -1 -49  21   64.38    5.82
   1 -49 -21   60.09    6.09
  -1  49 -21   66.92    6.03
   1 -49  23   31.71    4.41
  -1  49  23   28.66    4.63
   1  49 -23   30.16    4.00
  -1 -49 -23   26.63    4.07
   1  49  23   23.36    3.66
  -1 -49  23   29.06    4.74
   1 -49 -23   25.85    4.60
  -1  49 -23   30.78    4.54
   1 -49  25  166.30   10.91
  -1  49  25  159.10   10.66
   1  49 -25  155.10   10.47
  -1 -49 -25  157.90   10.79
   1  49  25  149.80   10.40
  -1 -49  25  162.30   10.93
   1 -49 -25  142.70    9.77
  -1  49 -25  143.00    9.80
   1 -49  27   -0.51    3.94
  -1  49  27    2.41    3.28
   1  49 -27    2.00    3.67
  -1 -49 -27    0.50    2.89
   1  49  27    2.38    2.65
  -1 -49  27   -1.42    2.88
   1 -49 -27   -0.37    3.96
  -1  49 -27    2.05    2.88
   1 -49  29    8.23    4.18
  -1  49  29   11.89    3.83
   1  49 -29   12.01    3.99
  -1 -49 -29    5.79    4.68
   1  49  29    3.26    3.77
  -1 -49  29    6.20    4.03
   1 -49 -29   16.35    4.24
  -1  49 -29   16.13    3.78
   1 -51   1   34.82    4.53
  -1  51   1   22.70    3.38
   1  51  -1   17.57    3.80
  -1 -51  -1   19.16    3.85
   1  51   1   25.10    4.54
  -1 -51   1   25.04    4.65
   1 -51  -1   29.60    4.40
  -1  51  -1   24.32    4.63
   1 -51   3    4.92    3.42
  -1  51   3   19.88    4.33
   1  51  -3   20.07    4.51
  -1 -51  -3   14.93    4.24
   1  51   3   13.75    4.14
  -1 -51   3    9.45    3.56
   1 -51  -3   13.44    3.98
  -1  51  -3    4.99    2.82
   1 -51   5    6.15    4.10
  -1  51   5    9.73    3.53
   1  51  -5    8.82    3.75
  -1 -51  -5   11.99    4.13
   1  51   5   12.30    3.22
  -1 -51   5    0.79    4.23
   1 -51  -5    5.76    2.90
  -1  51  -5    2.59    4.39
   1 -51   7   -2.87    2.73
  -1  51   7   -3.37    2.48
   1  51  -7   -6.04    3.69
  -1 -51  -7    1.36    3.77
   1  51   7    1.66    3.72
  -1 -51   7   -7.45    3.90
   1 -51  -7   -2.49    3.84
  -1  51  -7   -1.74    3.37
   1 -51   9    1.63    2.69
  -1  51   9   -2.81    3.51
   1  51  -9    5.34    4.05
  -1 -51  -9    1.40    3.82
   1  51   9    3.60    4.08
  -1 -51   9   -0.82    3.27
   1 -51  -9    2.86    3.74
  -1  51  -9    6.24    3.62
   1 -51  11    6.05    3.74
  -1  51  11    6.07    3.97
   1  51 -11    5.24    3.63
  -1 -51 -11   -1.65    4.02
   1  51  11   13.40    4.29
  -1 -51  11    6.11    2.98
   1 -51 -11    6.81    3.69
  -1  51 -11    5.86    3.97
   1 -51  13   83.58    6.98
  -1  51  13   82.37    6.64
   1  51 -13   63.93    5.43
  -1 -51 -13   81.55    6.92
   1  51  13   84.33    7.18
  -1 -51  13   79.01    6.75
   1 -51 -13   84.19    6.42
  -1  51 -13   80.95    6.71
   1 -51  15   19.89    4.40
  -1  51  15   24.93    4.12
   1  51 -15   27.20    4.20
  -1 -51 -15   23.17    4.35
   1  51  15   31.91    4.98
  -1 -51  15   24.28    4.63
   1 -51 -15   25.47    3.54
  -1  51 -15   22.55    4.42
   1 -51  17   48.20    5.43
  -1  51  17   43.11    4.97
   1  51 -17   55.44    5.51
  -1 -51 -17   55.77    5.43
   1  51  17   52.62    5.40
  -1 -51  17   60.66    6.09
   1 -51 -17   58.75    5.07
  -1  51 -17   46.61    5.32
   1 -51  19    7.62    4.13
  -1  51  19    5.58    3.60
   1  51 -19    3.14    3.65
  -1 -51 -19    9.43    3.61
   1  51  19    2.28    3.37
  -1 -51  19    7.97    4.07
   1 -51 -19    5.85    3.11
  -1  51 -19   -1.97    3.58
   1 -51  21   -1.97    3.53
  -1  51  21    3.87    3.37
   1  51 -21    2.85    3.40
  -1 -51 -21    3.33    2.69
   1  51  21    7.44    3.11
  -1 -51  21   -0.87    3.70
   1 -51 -21    3.30    3.44
  -1  51 -21    2.03    3.85
   1 -51  23    3.33    2.67
  -1  51  23   -1.04    2.65
   1  51 -23    0.82    3.77
  -1 -51 -23    3.28    3.15
   1  51  23    2.90    3.71
  -1 -51  23    0.99    2.59
   1 -51 -23   -1.84    3.85
  -1  51 -23   -0.66    3.66
   1 -53   1  102.40    7.64
  -1  53   1  122.70    8.61
   1  53  -1  102.50    7.51
  -1 -53  -1  111.00    8.36
   1  53   1  110.90    7.85
  -1 -53   1  100.10    7.61
   1 -53  -1  119.30    8.42
  -1  53  -1  123.80    8.69
   1 -53   3   29.32    3.67
  -1  53   3   23.15    3.35
   1  53  -3   26.26    4.09
  -1 -53  -3   13.02    4.01
   1  53   3   29.75    4.26
  -1 -53   3   25.42    4.75
   1 -53  -3   31.22    4.53
  -1  53  -3   33.55    4.46
   1 -53   5   41.73    5.05
  -1  53   5   36.48    4.47
   1  53  -5   37.72    4.66
  -1 -53  -5   35.67    4.80
   1  53   5   46.29    5.07
  -1 -53   5   39.75    4.77
   1 -53  -5   42.01    4.26
  -1  53  -5   36.15    4.33
   1 -53   7    6.26    3.63
  -1  53   7    3.44    3.82
   1  53  -7    1.29    3.03
  -1 -53  -7    1.05    4.13
   1  53   7   -3.48    2.62
  -1 -53   7    3.54    4.22
   1 -53  -7   -3.93    3.79
  -1  53  -7   -3.82    3.95
   1 -53   9   48.74    4.53
  -1  53   9   52.52    4.95
   1  53  -9   45.53    5.20
  -1 -53  -9   44.57    4.22
   1  53   9   46.62    4.59
  -1 -53   9   38.70    5.23
   1 -53  -9   57.60    5.45
  -1  53  -9   48.59    4.53
   1 -53  11    4.15    3.27
  -1  53  11    2.45    2.60
   1  53 -11    0.77    2.77
  -1 -53 -11    2.07    2.53
   1  53  11    0.02    3.64
  -1 -53  11    1.37    3.92
   1 -53 -11    4.67    2.78
  -1  53 -11    4.50    2.87
   1 -53  13   55.72    5.36
  -1  53  13   54.56    4.78
   1  53 -13   48.04    4.90
  -1 -53 -13   51.74    4.87
   1  53  13   51.02    5.33
  -1 -53  13   39.08    4.64
   1 -53 -13   50.29    4.56
  -1  53 -13   49.90    4.98
   1 -53  15   12.31    3.85
  -1  53  15    8.16    3.01
   1  53 -15    3.97    3.51
  -1 -53 -15    9.11    3.52
   1  53  15   10.09    3.84
  -1 -53  15   10.39    3.40
   1 -53 -15   12.26    3.11
  -1  53 -15   19.08    4.86
   2   0   0   -0.88    3.52
  -2   0   0   -1.25    3.55
   2   0   2 2216.00  128.70
  -2   0   2 2150.00  124.90
   2   0  -2 2347.00  136.20
  -2   0  -2 2363.00  137.10
   2   0   4   -0.14    3.18
  -2   0   4    3.82    3.74
   2   0  -4    3.63    3.94
  -2   0  -4    0.08    3.08
   2   0   6  193.30   12.11
  -2   0   6  192.30   12.51
   2   0  -6  207.60   13.43
  -2   0  -6  198.90   12.37
   2   0   8    0.32    2.98
  -2   0   8    3.11    4.28
   2   0  -8   -1.46    4.21
  -2   0  -8    1.20    2.90
   2   0  10   12.11    2.80
  -2   0  10    6.74    3.98
   2   0 -10    4.40    3.73
  -2   0 -10    6.75    2.46
   2   0  12   -1.41    1.91
  -2   0  12   -1.96    3.71
   2   0 -12    1.68    3.83
  -2   0 -12    0.41    2.07
   2   0  16   -0.11    1.40
  -2   0  16    3.06    3.17
   2   0 -16    0.57    3.23
  -2   0 -16   -0.07    1.33
  -2   0  18  317.60   19.35
   2   0 -18  299.20   18.30
  -2   0 -18  302.00   17.78
  -2   0 -18  335.00   19.70
  -2   0  20    1.41    3.19
   2   0 -20    4.98    2.91
  -2   0  24    2.85    2.72
   2   0 -24    0.40    2.82
  -2   0  26  725.80   42.62
   2   0 -26  674.10   39.87
  -2   0  28   -3.92    2.45
   2   0 -28   -5.37    2.96
  -2   0  30 1379.00   80.48
  -2   0  30 1230.00   71.77
  -2   0  32    2.50    2.38
  -2   0  32    0.78    2.49
  -2   0  34  662.40   39.00
  -2   0  34  738.20   43.55
  -2   0  36    0.58    2.32
  -2   0  36   -0.75    2.71
  -2   0  38  355.70   21.43
  -2   0  38  329.40   19.88
  -2   0  40    0.67    2.38
  -2   0  40    2.84    2.51
  -2   0  42  316.80   18.99
  -2   0  42  272.50   16.63
  -2   0  44    0.33    2.24
  -2   0  44    0.77    2.32
  -2   0  46   70.09    5.19
  -2   0  46   88.01    6.34
  -2   0  48   -0.63    2.01
  -2   0  48    0.84    1.99
  -2   0  50   64.35    4.63
  -2   0  50   63.63    4.64
  -2   0  52    1.30    1.75
  -2   0  52    0.13    1.69
   2  -2   2  397.70   23.85
  -2   2   2  397.60   23.97
   2   2  -2  379.80   22.85
  -2  -2  -2  490.70   29.23
   2   2   2  433.50   25.92
  -2  -2   2  408.70   24.65
   2  -2  -2  389.80   23.47
  -2   2  -2  420.00   25.13
   2  -2   4  777.20   45.59
  -2   2   4  822.70   48.39
   2   2  -4  809.60   47.56
  -2  -2  -4  876.50   51.37
   2   2   4  744.90   43.71
   2  -2  -4  782.90   46.05
  -2   2  -4  889.60   52.14
   2  -2   6 1994.00  115.80
  -2   2   6 2064.00  120.00
   2   2  -6 2150.00  125.00
  -2  -2  -6 1762.00  102.40
   2   2   6 1979.00  114.90
  -2  -2   6 2363.00  137.30
   2  -2  -6 2056.00  119.60
   2  -2   8   10.17    2.94
  -2   2   8    5.78    3.82
   2   2  -8    8.48    4.30
  -2  -2  -8    5.22    3.19
   2   2   8    2.34    2.60
  -2  -2   8    7.03    4.25
   2  -2  -8    3.43    4.28
  -2   2  -8    5.68    3.03
   2  -2  10  554.00   32.59
  -2   2  10  479.00   28.79
   2   2 -10  535.70   32.08
  -2  -2 -10  589.30   34.62
  -2  -2 -10  554.80   32.64
  -2  -2  10  583.30   34.79
   2  -2 -10  588.00   35.04
  -2   2 -10  546.80   32.18
   2  -2  12   40.64    3.50
  -2   2  12   53.86    5.48
   2   2 -12   39.89    4.99
  -2  -2 -12   38.33    3.41
  -2  -2 -12   44.10    3.67
  -2  -2  12   37.12    4.88
   2  -2 -12   50.07    5.47
  -2   2 -12   49.92    3.99
   2  -2  14  820.60   47.85
  -2   2  14  803.30   47.42
   2   2 -14  877.00   51.60
  -2  -2 -14  861.70   50.22
  -2  -2 -14  849.40   49.48
  -2  -2  14  793.40   46.91
   2  -2 -14  957.70   56.38
  -2   2 -14  843.30   49.17
   2  -2  16    1.55    1.59
  -2   2  16   -0.08    3.23
   2   2 -16   -1.50    3.45
  -2  -2 -16    0.60    1.41
  -2  -2 -16    1.41    1.43
  -2  -2  16   -2.40    4.02
   2  -2 -16   -0.04    3.37
  -2   2 -16   -1.62    1.73
   2  -2  18  165.30    9.97
  -2   2  18  160.00   10.40
   2   2 -18  160.70   10.52
  -2  -2 -18  179.10   10.65
  -2  -2 -18  162.30    9.66
   2  -2 -18  174.20   11.21
  -2   2 -18  155.80    9.34
   2  -2  20  349.90   20.54
  -2   2  20  311.20   19.02
  -2  -2  20  369.30   22.36
   2  -2 -20  398.50   23.93
  -2   2 -20  354.60   20.82
  -2   2  22  207.90   13.05
  -2  -2  22  286.20   17.58
  -2  -2  22  293.50   17.87
  -2   2  24   -1.30    2.30
  -2  -2  24    1.62    2.54
  -2  -2  24   -1.40    2.65
   2  -2 -24   -0.64    2.86
  -2   2  26  672.20   39.51
  -2  -2  26  712.70   41.89
  -2  -2  26  635.50   37.56
   2  -2 -26  710.70   41.91
  -2   2  28   -1.12    2.37
  -2  -2  28   -0.78    2.52
  -2  -2  28   -2.37    2.62
   2  -2 -28    1.04    2.34
  -2   2  30  903.80   53.04
  -2  -2  30  855.70   50.19
  -2  -2  30  870.40   51.19
   2  -2 -30  894.80   52.49
  -2   2  32    9.62    2.74
  -2  -2  32    7.65    2.68
  -2  -2  32    3.08    2.68
   2  -2 -32    8.61    2.55
  -2   2  34  237.10   14.56
  -2  -2  34  230.20   14.20
  -2  -2  34  207.00   13.06
  -2   2  36  203.50   12.70
  -2   2  36  192.50   12.24
  -2  -2  36  199.10   12.64
  -2  -2  36  194.50   12.12
  -2   2  38 1341.00   78.30
  -2   2  38 1434.00   83.68
  -2  -2  38 1263.00   73.78
  -2  -2  38 1342.00   78.38
  -2   2  40    1.59    2.32
  -2   2  40    2.82    2.33
  -2  -2  40    5.24    2.50
  -2  -2  40    2.97    2.52
  -2   2  42 1138.00   66.35
  -2   2  42 1074.00   62.84
  -2  -2  42 1125.00   65.66
  -2  -2  42 1006.00   58.93
  -2   2  44   57.07    4.63
  -2   2  44   63.50    4.76
  -2  -2  44   59.14    4.68
  -2  -2  44   71.18    5.25
  -2   2  46   73.55    5.30
  -2   2  46   73.23    5.45
  -2  -2  46   64.74    4.91
  -2  -2  46   72.24    5.38
  -2  -2  48   34.46    3.24
  -2  -2  48   36.39    3.38
  -2  -2  50  858.30   50.26
  -2  -2  50  692.90   40.67
  -2   2  52   -0.74    1.66
  -2   2  52    1.38    1.69
  -2  -2  52    1.30    1.85
  -2  -2  52    1.19    1.88
  -2  -4   0    1.39    3.37
  -2  -4   0    3.40    3.82
   2  -4   0   -2.26    2.95
  -2   4   0   -1.98    3.53
   2  -4   2 1167.00   68.22
  -2   4   2 1065.00   62.28
  -2  -4  -2 1045.00   61.14
  -2  -4  -2 1190.00   69.51
  -2  -4   2 1064.00   62.26
  -2  -4   2 1120.00   65.53
   2  -4  -2 1109.00   64.94
  -2   4  -2 1089.00   63.69
   2  -4   4 2139.00  124.30
  -2   4   4 2169.00  126.00
  -2  -4  -4 2111.00  122.60
  -2  -4  -4 2242.00  130.20
  -2  -4   4 2051.00  119.30
  -2  -4   4 2179.00  126.70
   2  -4  -4 2137.00  124.30
  -2   4  -4 2059.00  119.70
   2  -4   6  385.70   23.15
  -2   4   6  427.40   25.70
  -2  -4  -6  422.20   25.21
  -2  -4  -6  399.60   24.00
  -2  -4   6  410.40   24.92
  -2  -4   6  443.70   26.75
   2  -4  -6  414.50   25.04
  -2   4  -6  381.80   22.96
   2  -4   8   11.72    3.60
  -2   4   8   13.90    4.45
  -2  -4  -8   12.14    3.50
  -2  -4  -8   12.83    3.24
  -2  -4   8    9.20    4.48
  -2  -4   8    8.91    4.41
   2  -4  -8   11.29    4.40
  -2   4  -8    9.44    3.45
   2  -4  10   54.74    4.81
  -2   4  10   66.68    6.20
  -2  -4 -10   65.48    5.26
  -2  -4 -10   65.03    5.15
  -2  -4  10   53.51    5.71
  -2  -4  10   68.18    6.20
   2  -4 -10   68.06    6.33
  -2   4 -10   60.84    4.96
   2  -4  12  338.60   20.23
  -2   4  12  369.80   22.57
  -2  -4 -12  337.50   20.09
  -2  -4 -12  319.80   19.09
  -2  -4  12  358.00   21.91
  -2  -4  12  358.90   22.07
   2  -4 -12  341.50   20.86
  -2   4 -12  342.70   20.47
   2  -4  14  629.90   36.91
  -2   4  14  546.30   32.65
  -2  -4 -14  608.10   35.64
  -2  -4 -14  518.80   30.46
  -2  -4  14  607.50   36.11
  -2  -4  14  635.00   37.80
   2  -4 -14  597.40   35.51
  -2   4 -14  584.00   34.28
   2  -4  16   45.27    3.58
  -2   4  16   50.61    4.93
  -2  -4 -16   36.33    2.98
  -2  -4 -16   42.17    3.34
  -2  -4  16   39.59    4.60
  -2  -4  16   40.25    4.43
   2  -4 -16   44.59    4.59
  -2   4 -16   54.54    3.97
   2  -4  18  105.40    6.72
  -2   4  18  110.60    7.85
  -2  -4 -18  110.90    6.82
  -2  -4 -18  104.60    6.50
  -2  -4  18  114.20    8.14
  -2  -4  18  101.50    7.36
   2  -4 -18  102.70    7.37
  -2   4 -18  100.50    6.37
   2  -4  20 2676.00  155.20
  -2   4  20 2170.00  126.20
  -2  -4 -20 2207.00  128.30
  -2  -4  20 2232.00  129.80
  -2  -4  20 2230.00  129.70
   2  -4 -20 2569.00  149.30
  -2   4 -20 2202.00  127.80
   2  -4  22    7.51    1.44
  -2   4  22   10.98    3.14
  -2  -4 -22   10.75    1.18
  -2  -4 -22   10.20    1.12
  -2  -4  22   14.70    3.10
  -2  -4  22   10.84    3.31
   2  -4 -22    7.51    3.18
  -2   4 -22   10.39    1.54
   2  -4  24  714.20   41.75
  -2   4  24  711.30   41.82
  -2  -4  24  722.90   42.60
  -2  -4  24  683.00   40.27
   2  -4 -24  706.20   41.68
  -2   4 -24  711.60   41.58
  -2   4  26   86.26    6.20
  -2  -4  26   87.07    6.43
  -2  -4  26  103.00    7.35
   2  -4 -26   89.19    6.47
  -2   4 -26   85.85    5.26
  -2   4  28  311.60   18.91
  -2  -4  28  351.80   21.27
  -2  -4  28  315.10   19.19
  -2   4  30    1.31    2.42
  -2  -4  30    2.44    2.60
  -2  -4  30    2.96    2.84
   2  -4 -30    4.33    2.67
  -2   4  32 2188.00  127.20
  -2  -4  32 1899.00  110.40
  -2  -4  32 1924.00  112.10
   2  -4 -32 1913.00  111.30
  -2   4  34   -0.55    2.34
  -2  -4  34   -0.64    2.34
  -2  -4  34    3.09    2.45
   2  -4 -34    2.04    2.44
  -2   4  36   51.24    4.34
  -2  -4  36   56.83    4.59
  -2  -4  36   52.13    4.81
   2  -4 -36   49.37    4.39
  -2   4  38  241.50   14.90
  -2  -4  38  317.20   19.21
  -2  -4  38  263.20   16.29
  -2   4  40  500.50   29.71
  -2   4  40  476.70   28.31
  -2  -4  40  475.90   28.38
  -2  -4  40  545.80   32.50
  -2   4  42   18.88    3.10
  -2   4  42   18.62    2.72
  -2  -4  42   20.76    3.12
  -2  -4  42   21.19    2.88
  -2   4  44  446.00   26.54
  -2   4  44  436.90   26.01
  -2  -4  44  499.70   29.65
  -2  -4  44  432.40   25.75
  -2   4  46   14.25    2.82
  -2   4  46   14.95    2.60
  -2  -4  46   20.49    2.96
  -2  -4  46   18.13    2.89
  -2   4  48  112.50    7.35
  -2   4  48  115.80    7.52
  -2  -4  50   21.86    2.75
  -2  -4  50   19.12    2.55
  -2   4  52  216.00   13.03
  -2   4  52  219.00   13.17
  -2  -4  52  192.30   11.80
  -2  -4  52  202.80   12.42
  -2  -4  54    0.42    1.81
  -2  -4  54    0.77    1.53
   2   6   0 1071.00   62.76
  -2  -6   0 1028.00   60.38
   2  -6   0 1047.00   61.40
  -2   6   0 1115.00   65.36
   2  -6   2  994.20   58.35
  -2   6   2  882.60   52.05
   2   6  -2 1010.00   59.32
   2   6   2  984.10   57.75
  -2  -6   2 1010.00   59.31
   2  -6  -2 1047.00   61.42
  -2   6  -2 1061.00   62.17
   2  -6   4    3.05    4.00
  -2   6   4    3.91    3.41
   2   6  -4    3.77    4.66
  -2  -6  -4    1.89    3.62
   2   6   4    2.34    3.65
  -2  -6   4    4.71    4.33
   2  -6  -4    3.87    3.95
  -2   6  -4    0.38    4.12
   2  -6   6  830.70   48.84
  -2   6   6  853.30   50.40
   2   6  -6  797.70   47.25
  -2  -6  -6  720.20   42.43
   2   6   6  830.30   48.77
  -2  -6   6  855.20   50.62
   2  -6  -6  969.80   57.04
  -2   6  -6  837.50   49.33
   2  -6   8  553.60   32.91
  -2   6   8  597.10   35.62
   2   6  -8  595.30   35.54
  -2  -6  -8  605.30   35.81
   2   6   8  600.70   35.57
  -2  -6   8  617.60   36.85
   2  -6  -8  605.30   36.25
  -2   6  -8  561.80   33.36
   2  -6  10  755.90   44.51
  -2   6  10  771.20   45.67
  -2  -6 -10  813.70   47.74
   2   6  10  841.80   49.35
  -2  -6  10  804.60   47.62
  -2  -6  10  834.80   49.39
  -2   6 -10  728.60   42.85
   2  -6  12  659.50   38.88
  -2   6  12  622.30   37.10
  -2  -6 -12  625.20   36.78
   2   6  12  601.80   35.37
  -2  -6  12  657.80   39.07
  -2  -6  12  623.80   37.16
   2  -6 -12  631.10   37.57
  -2   6 -12  606.40   35.71
   2  -6  14  383.00   22.84
  -2   6  14  363.80   22.23
  -2  -6 -14  343.10   20.48
   2   6  14  358.10   21.25
  -2  -6  14  322.70   19.91
  -2  -6  14  373.60   22.82
   2  -6 -14  344.10   21.04
  -2   6 -14  363.00   21.66
   2  -6  16    0.69    2.36
  -2   6  16    3.73    3.28
  -2  -6 -16   -0.01    2.06
   2   6  16    1.71    2.06
  -2  -6  16   -0.10    3.16
  -2  -6  16    2.19    3.18
   2  -6 -16   -3.05    3.35
  -2   6 -16    2.13    2.40
   2  -6  18   20.45    2.66
  -2   6  18   19.65    3.33
  -2  -6 -18   21.24    2.61
   2   6  18   22.61    2.57
  -2  -6  18   20.36    3.52
  -2  -6  18   19.66    4.04
   2  -6 -18   24.33    3.85
  -2   6 -18   20.70    2.67
   2  -6  20  721.00   42.14
  -2  -6 -20  654.90   38.28
   2   6  20  681.90   39.84
  -2  -6  20  641.50   38.01
  -2  -6  20  692.60   40.98
   2  -6 -20  715.00   42.23
  -2   6 -20  666.10   39.00
   2  -6  22   77.26    5.14
  -2   6  22   73.76    5.76
  -2  -6 -22   69.00    4.63
  -2  -6 -22   71.65    4.64
  -2  -6  22   64.91    5.49
  -2  -6  22   75.03    5.95
   2  -6 -22   64.00    5.39
  -2   6 -22   70.90    4.82
   2  -6  24   31.00    2.69
  -2  -6 -24   27.99    2.19
  -2  -6 -24   29.85    2.35
  -2  -6  24   26.02    3.53
  -2  -6  24   29.24    3.68
   2  -6 -24   31.10    3.83
  -2   6 -24   35.15    2.87
   2  -6  26   23.52    2.31
  -2   6  26   23.84    3.32
  -2  -6 -26   22.62    1.74
  -2  -6 -26   22.52    1.71
  -2  -6  26   16.60    3.37
  -2  -6  26   16.35    3.25
   2  -6 -26   24.48    4.48
  -2   6 -26   24.05    2.29
   2  -6  28    8.56    1.46
  -2   6  28   13.35    2.90
  -2  -6  28    8.66    2.96
  -2  -6  28    8.99    3.16
   2  -6 -28    7.47    3.05
  -2   6 -28    6.16    1.41
   2  -6  30  131.10    7.89
   2  -6  30  131.10    7.86
  -2   6  30  135.20    9.19
  -2  -6  30  127.80    8.64
  -2  -6  30  129.20    8.97
   2  -6 -30  134.80    8.95
  -2   6  32   -1.47    2.65
  -2  -6  32    1.03    2.74
  -2  -6  32    0.56    3.21
   2  -6 -32   -0.71    2.70
  -2   6  34   92.84    6.46
  -2  -6  34   96.16    6.74
  -2  -6  34   90.92    6.41
   2  -6 -34   99.85    7.00
  -2   6  36  504.50   29.91
  -2  -6  36  608.30   36.33
  -2  -6  36  522.90   30.96
   2  -6 -36  524.70   31.13
  -2   6  38  104.60    7.16
  -2  -6  38  103.90    7.32
  -2  -6  38   97.48    7.12
   2  -6 -38   99.84    6.91
  -2   6  40    3.52    2.43
  -2  -6  40    3.15    2.48
  -2  -6  40    1.47    2.75
   2  -6 -40    4.80    2.35
  -2   6  42   92.39    6.37
  -2  -6  42   47.55    4.24
   2  -6 -42   59.44    4.76
  -2   6  44  270.70   16.44
  -2   6  44  264.90   16.23
  -2  -6  44  259.00   15.81
  -2  -6  44  276.10   16.89
  -2   6  46  141.00    9.15
  -2   6  46  124.10    8.14
  -2  -6  46  122.30    8.23
  -2  -6  46  121.70    8.11
  -2   6  48   10.12    2.40
  -2   6  48   15.40    2.48
  -2  -6  48   13.72    2.69
  -2  -6  48    9.63    2.35
  -2  -6  50  103.30    6.95
  -2  -6  50   98.92    6.66
  -2   6  52   27.64    2.79
  -2   6  52   38.53    3.41
  -2  -6  52   38.70    3.44
  -2  -6  52   40.34    3.48
  -2  -6  54  156.00    9.73
  -2  -6  54  149.50    9.28
   2   8   0   -4.05    4.91
  -2  -8   0   -4.33    4.69
   2  -8   0    4.62    4.85
  -2   8   0    4.82    4.99
   2  -8   2  538.20   32.43
  -2   8   2  517.30   31.32
   2   8  -2  485.00   29.49
  -2  -8  -2  591.20   35.33
   2   8   2  525.00   31.50
  -2  -8   2  525.40   31.58
   2  -8  -2  547.80   32.93
  -2   8  -2  557.20   33.47
   2  -8   4  439.70   26.66
  -2   8   4  442.30   26.94
   2   8  -4  449.10   27.38
  -2  -8  -4  428.00   25.85
   2   8   4  423.30   25.74
  -2  -8   4  415.40   25.41
   2  -8  -4  480.10   29.10
  -2   8  -4  433.60   26.31
   2  -8   6   52.79    5.60
  -2   8   6   53.36    6.45
   2   8  -6   61.61    6.12
  -2  -8  -6   56.08    5.60
   2   8   6   57.65    5.72
  -2  -8   6   65.32    5.95
   2  -8  -6   56.84    6.26
  -2   8  -6   58.28    6.02
   2  -8   8   95.87    7.38
  -2   8   8   93.04    7.81
   2   8  -8   96.24    7.87
  -2  -8  -8   99.01    7.33
   2   8   8  100.00    7.68
  -2  -8   8  108.30    8.65
   2  -8  -8   90.53    7.26
  -2   8  -8  104.40    7.82
   2  -8  10  112.80    8.19
  -2   8  10  120.80    9.04
   2   8 -10  109.20    8.19
  -2  -8 -10  118.00    8.22
   2   8  10  106.40    7.59
  -2  -8  10  119.50    8.66
   2  -8 -10  105.20    8.17
  -2   8 -10  114.50    8.10
   2  -8  12   61.18    5.27
  -2   8  12   44.14    5.31
   2   8 -12   66.96    6.02
  -2  -8 -12   62.89    5.28
   2   8  12   60.03    4.93
  -2  -8  12   64.46    5.70
   2  -8 -12   73.28    6.38
  -2   8 -12   60.75    5.08
   2  -8  14  498.70   29.61
   2   8 -14  504.80   30.31
  -2  -8 -14  508.00   30.08
   2   8  14  491.80   29.12
  -2  -8  14  518.80   31.06
   2  -8 -14  577.50   34.51
  -2   8 -14  540.20   31.98
   2  -8  16  223.20   13.76
  -2  -8 -16  227.80   13.96
   2   8  16  212.70   13.12
  -2  -8  16  227.90   14.53
   2  -8 -16  225.50   14.43
  -2   8 -16  225.80   13.95
   2  -8  18  172.00   10.79
  -2   8  18  206.00   13.01
   2   8  18  175.60   10.93
  -2  -8  18  179.10   11.61
  -2  -8  18  183.60   11.99
   2  -8 -18  190.40   12.34
  -2   8 -18  156.10    9.89
   2  -8  20 2982.00  173.00
  -2   8  20 3215.00  186.60
   2   8  20 3067.00  177.80
  -2  -8  20 2891.00  167.90
  -2  -8  20 3114.00  180.90
  -2   8 -20 3132.00  181.60
   2  -8  22   22.55    2.59
  -2   8  22   28.12    3.86
  -2  -8 -22   24.57    2.44
   2   8  22   27.75    2.65
  -2  -8  22   30.48    4.03
  -2  -8  22   31.78    4.14
   2  -8 -22   31.99    3.94
  -2   8 -22   26.86    3.11
   2  -8  24 1006.00   58.65
  -2   8  24  874.20   51.33
  -2  -8 -24  976.40   56.90
   2   8  24  859.10   50.04
  -2  -8  24  945.00   55.54
  -2  -8  24  933.40   54.89
   2  -8 -24  949.40   55.74
  -2   8 -24  882.40   51.57
   2  -8  26   62.20    4.46
  -2   8  26   64.58    5.41
  -2  -8 -26   70.56    4.65
   2   8  26   65.21    4.28
  -2  -8  26   75.02    5.99
  -2  -8  26   73.60    6.08
   2  -8 -26   69.00    5.64
  -2   8 -26   68.72    4.77
   2  -8  28  126.10    7.99
  -2   8  28  135.20    9.18
  -2  -8 -28  108.80    6.74
  -2  -8  28  142.70    9.75
  -2  -8  28  140.10    9.62
   2  -8 -28  110.50    7.65
  -2   8 -28  131.20    8.29
   2  -8  30  279.30   16.61
  -2   8  30  265.40   16.52
  -2  -8 -30  271.40   16.10
  -2  -8 -30  235.80   14.00
  -2  -8  30  272.50   17.11
  -2  -8  30  249.00   15.66
   2  -8 -30  261.60   16.16
  -2   8 -30  262.30   15.66
   2  -8  32  627.60   36.71
  -2   8  32  600.90   35.57
  -2  -8  32  657.40   38.84
  -2  -8  32  586.60   34.78
   2  -8 -32  604.20   35.89
  -2   8 -32  621.50   36.37
   2  -8  34  222.30   13.19
   2  -8  34  196.10   11.73
  -2   8  34  223.00   13.78
  -2  -8  34  239.00   14.78
  -2  -8  34  224.90   14.01
   2  -8 -34  242.70   15.02
  -2   8  36  180.10   11.35
  -2  -8  36  204.50   12.97
  -2  -8  36  189.90   12.07
   2  -8 -36  215.40   13.44
  -2   8  38   37.31    3.95
  -2  -8  38   38.24    4.33
  -2  -8  38   35.76    3.99
   2  -8 -38   38.29    3.88
  -2   8  40   13.07    2.99
  -2  -8  40    5.20    2.90
  -2  -8  40    8.05    2.88
   2  -8 -40    7.56    2.61
  -2   8  42   82.10    5.85
  -2  -8  42   76.45    5.74
  -2  -8  42   79.62    6.14
   2  -8 -42   67.71    5.26
  -2   8  44   43.95    3.93
  -2  -8  44   46.61    4.10
  -2  -8  44   43.14    4.05
  -2   8  46   17.55    2.87
  -2   8  46   19.58    2.85
  -2  -8  46   18.16    3.11
  -2  -8  46   19.36    3.00
  -2   8  48    9.14    2.55
  -2   8  48    6.38    2.20
  -2  -8  48   14.44    2.78
  -2  -8  48    8.07    2.57
  -2   8  50    3.18    1.93
  -2   8  50    6.02    2.26
  -2  -8  50    5.02    2.53
  -2  -8  50    7.25    2.66
  -2   8  52  190.70   11.69
  -2   8  52  156.10    9.74
  -2  -8  52  200.30   12.38
  -2  -8  52  182.10   11.35
  -2   8  54    2.41    1.64
  -2   8  54    0.22    1.44
  -2  -8  54    3.46    2.54
  -2  -8  54    3.19    2.35
  -2  -8  56   97.97    6.34
  -2  -8  56  109.70    6.99
   2  10   0  598.50   35.92
  -2 -10   0  593.00   35.55
   2 -10   0  581.80   34.94
  -2  10   0  563.40   33.92
   2 -10   2 1005.00   59.31
  -2  10   2 1102.00   64.87
   2  10  -2 1011.00   59.67
  -2 -10  -2 1118.00   65.89
   2  10   2 1178.00   69.21
  -2 -10   2  973.50   57.39
   2 -10  -2 1017.00   59.94
  -2  10  -2 1040.00   61.30
   2 -10   4    8.16    4.07
  -2  10   4   10.28    3.78
   2  10  -4   10.71    4.43
  -2 -10  -4    6.41    4.29
   2  10   4    4.36    4.49
  -2 -10   4    9.64    3.56
   2 -10  -4    5.85    4.43
  -2  10  -4    9.11    4.59
   2 -10   6 2004.00  116.80
  -2  10   6 2073.00  120.80
   2  10  -6 1709.00   99.93
  -2 -10  -6 1911.00  111.40
   2  10   6 2043.00  119.10
  -2 -10   6 1904.00  111.00
   2 -10  -6 1971.00  114.90
  -2  10  -6 1957.00  114.00
   2 -10   8   63.40    5.91
  -2  10   8   60.20    5.52
   2  10  -8   64.47    6.51
  -2 -10  -8   60.01    5.38
   2  10   8   56.08    5.62
  -2 -10   8   57.48    6.07
   2 -10  -8   64.93    6.20
  -2  10  -8   60.40    5.90
   2 -10  10  956.40   56.18
  -2  10  10  950.00   55.94
   2  10 -10  960.50   56.62
  -2 -10 -10 1055.00   61.85
   2  10  10 1054.00   61.83
  -2 -10  10  931.40   54.84
   2 -10 -10  853.00   50.40
  -2  10 -10  943.20   55.41
   2 -10  12  377.30   22.91
  -2  10  12  380.10   23.24
   2  10 -12  344.20   21.28
  -2 -10 -12  362.40   21.90
   2  10  12  416.70   25.02
  -2 -10  12  417.60   25.34
   2 -10 -12  379.60   23.09
  -2  10 -12  372.70   22.60
   2 -10  14  876.40   51.46
  -2  10  14  900.10   52.98
   2  10 -14  913.70   53.89
  -2 -10 -14  848.30   49.76
   2  10  14 1035.00   60.59
  -2 -10  14  971.50   57.15
   2 -10 -14  851.40   50.27
  -2  10 -14  891.80   52.34
   2 -10  16    9.03    2.90
  -2  10  16    6.81    3.33
   2  10 -16    4.87    3.50
  -2 -10 -16    3.60    2.88
   2  10  16    7.45    3.13
  -2 -10  16    5.57    3.24
   2 -10 -16    6.53    3.58
  -2  10 -16    7.27    3.02
   2 -10  18  654.80   38.57
  -2  10  18  648.30   38.47
   2  10 -18  648.90   38.58
  -2 -10 -18  715.30   42.05
   2  10  18  663.40   39.12
   2 -10 -18  668.60   39.64
  -2  10 -18  677.10   39.89
   2 -10  20    2.68    2.45
  -2  10  20    3.00    2.80
  -2 -10 -20    2.73    2.45
   2  10  20    0.98    2.36
  -2 -10  20    0.31    3.48
  -2 -10  20    0.59    3.39
   2 -10 -20    0.46    3.11
  -2  10 -20    3.00    2.40
   2 -10  22 2501.00  145.20
  -2  10  22 2729.00  158.70
   2  10  22 2544.00  147.60
  -2 -10  22 2961.00  172.20
  -2 -10  22 3152.00  183.30
   2 -10 -22 2759.00  160.30
  -2  10 -22 2562.00  148.80
   2 -10  24  200.60   12.33
  -2  10  24  177.70   11.48
  -2 -10 -24  229.70   13.93
   2  10  24  202.40   12.36
  -2 -10  24  200.70   12.91
  -2 -10  24  232.40   14.79
  -2  10 -24  201.50   12.49
   2 -10  26  415.90   24.71
  -2  10  26  443.00   26.64
  -2 -10 -26  422.70   24.99
   2  10  26  396.80   23.55
  -2 -10  26  426.40   25.68
  -2 -10  26  486.10   29.13
   2 -10 -26  459.50   27.57
  -2  10 -26  418.10   24.84
   2 -10  28   -0.67    2.06
  -2  10  28   -0.43    2.80
  -2 -10 -28    0.80    1.71
   2  10  28   -1.58    1.96
  -2 -10  28   -4.49    3.18
  -2 -10  28    3.14    3.13
   2 -10 -28   -0.12    2.75
  -2  10 -28    2.38    1.98
   2 -10  30  450.00   26.65
  -2  10  30  493.10   29.55
  -2 -10 -30  521.20   30.59
   2  10  30  481.10   28.33
  -2 -10  30  481.70   28.95
  -2 -10  30  477.60   28.80
   2 -10 -30  490.30   29.31
  -2  10 -30  523.00   30.85
   2 -10  32    5.47    1.81
  -2  10  32    3.22    3.07
  -2 -10 -32    3.43    1.49
  -2 -10  32    0.52    2.81
  -2 -10  32    7.09    2.57
   2 -10 -32    9.68    2.82
  -2  10 -32    2.49    1.95
   2 -10  34  650.50   38.20
  -2  10  34  557.40   33.02
  -2 -10 -34  567.40   33.47
  -2 -10  34  514.00   30.68
  -2 -10  34  597.30   35.35
   2 -10 -34  666.50   39.49
  -2  10 -34  566.50   33.32
   2 -10  36    8.10    1.74
   2 -10  36   11.90    1.71
  -2  10  36   11.81    2.95
  -2 -10  36    9.07    2.98
  -2 -10  36   12.39    3.07
   2 -10 -36   13.80    3.32
   2 -10  38   10.45    1.53
   2 -10  38    8.11    1.40
  -2  10  38   11.24    3.09
  -2 -10  38   14.22    3.52
  -2 -10  38    8.69    3.06
   2 -10 -38   12.22    2.86
  -2  10  40   46.10    4.09
  -2 -10  40   55.96    4.89
   2 -10 -40   51.20    4.43
  -2  10  42  105.40    7.18
  -2 -10  42  109.00    7.70
  -2 -10  42  104.00    7.12
   2 -10 -42  109.90    7.55
  -2  10  44  170.10   10.87
  -2 -10  44  168.80   11.05
  -2 -10  44  155.50   10.06
   2 -10 -44  170.10   10.88
  -2  10  46   16.10    2.64
  -2 -10  46   26.87    3.52
  -2 -10  46   32.16    3.43
   2 -10 -46   25.86    3.30
  -2  10  48   -0.82    2.27
  -2 -10  48    1.08    2.63
  -2 -10  48    3.89    2.78
   2 -10 -48   -2.41    2.24
  -2  10  50  240.00   14.71
  -2  10  50  264.20   16.04
  -2 -10  50  258.10   15.82
  -2 -10  50  259.00   15.89
  -2  10  52   22.15    2.88
  -2  10  52   19.04    2.63
  -2 -10  52   22.98    3.17
  -2 -10  52   23.76    3.25
  -2  10  54    4.97    1.81
  -2  10  54    6.28    2.05
  -2 -10  54    2.24    2.58
  -2 -10  54    0.91    2.27
  -2 -10  56    7.05    2.40
  -2 -10  56    7.70    2.38
   2  12   0   -1.09    3.22
  -2 -12   0    0.31    4.47
   2 -12   0   -2.01    4.35
  -2  12   0    1.15    3.26
   2 -12   2  329.20   20.48
  -2  12   2  370.50   22.97
   2  12  -2  345.50   21.50
  -2 -12  -2  374.60   22.91
   2  12   2  291.20   18.20
  -2 -12   2  348.90   21.46
   2 -12  -2  381.50   23.33
  -2  12  -2  332.20   20.60
   2 -12   4    9.39    4.51
  -2  12   4   10.43    4.07
   2  12  -4    9.47    4.34
  -2 -12  -4    6.35    3.22
   2  12   4    8.57    4.12
  -2 -12   4    9.03    4.65
   2 -12  -4   12.36    4.75
  -2  12  -4    8.72    3.38
   2 -12   6   15.53    4.49
  -2  12   6    8.73    4.51
   2  12  -6   21.30    4.91
  -2 -12  -6   19.42    4.47
   2  12   6   11.11    3.75
  -2 -12   6   11.61    4.58
   2 -12  -6   16.71    4.75
  -2  12  -6   15.21    4.24
   2 -12   8  422.90   25.73
  -2  12   8  401.40   24.47
   2  12  -8  399.50   24.51
  -2 -12  -8  417.70   25.27
   2  12   8  360.50   21.99
  -2 -12   8  414.10   25.16
   2 -12  -8  421.80   25.70
  -2  12  -8  425.10   25.66
   2 -12  10  139.00    9.69
  -2  12  10  157.70   10.68
   2  12 -10  133.50    9.53
  -2 -12 -10  161.10   10.78
   2  12  10  148.60    9.91
  -2 -12  10  145.10   10.40
   2 -12 -10  151.10   10.18
  -2  12 -10  145.30    9.91
   2 -12  12  131.80    9.11
  -2  12  12  139.00   10.31
   2  12 -12  139.60    9.84
  -2 -12 -12  134.40    8.93
   2  12  12  133.40    9.01
  -2 -12  12  127.20    9.32
   2 -12 -12  142.50   10.05
  -2  12 -12  132.00    9.03
   2 -12  14  604.70   35.95
  -2  12  14  552.40   32.98
   2  12 -14  617.90   36.88
  -2 -12 -14  570.50   33.91
   2  12  14  615.20   36.40
  -2 -12  14  532.00   31.93
   2 -12 -14  590.90   35.29
  -2  12 -14  590.50   35.10
   2 -12  16  407.70   24.54
  -2  12  16  406.30   24.55
   2  12 -16  434.10   26.36
   2  12  16  419.30   25.17
  -2 -12  16  395.80   24.09
   2 -12 -16  424.50   25.68
  -2  12 -16  403.80   24.31
   2 -12  18  148.60    9.70
  -2  12  18  151.90   10.36
   2  12 -18  144.20   10.11
  -2 -12 -18  145.70    9.53
   2  12  18  142.10    9.29
  -2 -12  18  153.40   10.41
   2 -12 -18  163.30   10.91
  -2  12 -18  139.90    9.31
   2 -12  20  212.50   13.29
  -2  12  20  252.40   16.21
   2  12 -20  211.80   13.71
  -2 -12 -20  236.00   14.57
   2  12  20  214.30   13.23
  -2 -12  20  228.40   14.46
   2 -12 -20  258.80   16.15
  -2  12 -20  215.30   13.41
   2 -12  22  205.60   12.87
  -2  12  22  222.90   14.18
   2  12 -22  201.20   13.05
   2  12  22  191.50   11.87
  -2 -12  22  213.30   13.81
   2 -12 -22  207.10   13.32
  -2  12 -22  200.70   12.61
   2 -12  24  235.60   14.50
  -2  12  24  239.10   15.02
  -2 -12 -24  221.70   13.61
   2  12  24  226.60   13.91
  -2 -12  24  226.30   14.33
   2 -12 -24  201.10   12.96
  -2  12 -24  215.00   13.43
   2 -12  26    6.43    2.51
  -2  12  26    8.55    3.55
  -2 -12 -26    5.42    2.30
   2  12  26    7.51    2.44
  -2 -12  26    7.02    2.69
  -2 -12  26    9.45    3.30
   2 -12 -26    8.00    3.06
  -2  12 -26    2.65    2.64
   2 -12  28   96.74    6.70
  -2 -12 -28  109.30    7.12
   2  12  28  105.00    7.02
  -2 -12  28   96.82    7.11
  -2 -12  28  102.30    7.52
   2 -12 -28  108.80    7.80
  -2  12 -28  109.10    7.32
   2 -12  30  138.90    9.07
  -2  12  30  137.70    9.32
  -2 -12 -30  153.50    9.61
   2  12  30  143.00    8.91
  -2 -12  30  136.40    9.32
  -2 -12  30  143.50    9.78
   2 -12  32   58.39    4.57
  -2  12  32   61.65    4.89
  -2 -12 -32   62.39    4.53
   2  12  32   59.75    4.10
  -2 -12  32   68.68    5.77
  -2 -12  32   65.80    5.32
   2 -12 -32   58.71    5.10
  -2  12 -32   57.38    4.59
   2 -12  34  196.20   12.03
  -2 -12 -34  222.70   13.39
   2  12  34  206.10   12.38
  -2 -12  34  202.30   12.95
  -2 -12  34  262.40   16.30
   2 -12 -34  218.90   13.85
  -2  12 -34  220.00   13.51
   2 -12  36   46.23    3.86
  -2  12  36   37.84    3.97
  -2 -12 -36   43.11    3.16
  -2 -12  36   44.50    4.38
  -2 -12  36   42.77    4.44
   2 -12 -36   42.09    4.36
  -2  12 -36   37.61    3.45
   2 -12  38  286.80   17.16
  -2  12  38  286.30   17.68
  -2 -12  38  288.60   17.92
  -2 -12  38  276.80   17.23
  -2  12 -38  269.20   16.16
   2 -12  40   55.82    3.88
   2 -12  40   55.62    4.07
  -2  12  40   62.82    5.00
  -2 -12  40   64.77    5.46
  -2 -12  40   50.03    4.48
   2 -12 -40   49.70    4.54
   2 -12  42  168.60   10.13
   2 -12  42  190.00   11.40
  -2 -12  42  176.40   11.28
  -2 -12  42  189.10   12.07
   2 -12 -42  195.80   12.39
  -2  12  44    4.13    2.28
  -2 -12  44    3.38    3.13
  -2 -12  44    0.81    2.96
   2 -12 -44    1.60    2.47
  -2  12  46  110.70    7.40
  -2 -12  46   94.63    6.74
  -2 -12  46  107.30    7.60
   2 -12 -46  103.60    7.24
  -2  12  48    3.75    2.71
  -2 -12  48    1.40    2.76
  -2 -12  48    2.02    2.67
   2 -12 -48    2.42    2.42
  -2  12  50   21.29    3.14
  -2 -12  50   19.93    3.20
  -2 -12  50   25.57    3.49
   2 -12 -50   25.42    3.10
  -2  12  52    1.66    2.34
  -2  12  52    1.95    2.41
  -2 -12  52    4.71    2.80
  -2 -12  52    0.19    2.51
  -2  12  54    6.75    2.56
  -2  12  54    4.10    2.17
  -2 -12  54    8.43    2.64
  -2 -12  54    2.01    2.74
  -2 -12  56    4.73    2.75
  -2 -12  56    1.18    2.50
  -2 -12  58    1.27    2.22
  -2 -12  58    1.84    2.38
   2  14   0  239.10   15.51
  -2 -14   0  263.40   16.59
   2 -14   0  250.90   16.33
  -2  14   0  241.70   15.79
   2 -14   2  561.90   33.82
  -2  14   2  610.80   36.55
   2  14  -2  582.50   35.10
  -2 -14  -2  607.50   36.43
   2  14   2  540.90   32.40
  -2 -14   2  619.10   37.11
   2 -14  -2  552.10   33.14
  -2  14  -2  583.30   35.05
   2 -14   4    4.32    3.25
  -2  14   4    6.86    4.36
   2  14  -4    3.45    4.12
  -2 -14  -4    3.88    4.26
   2  14   4    0.60    3.88
  -2 -14   4    1.62    4.65
   2 -14  -4    2.34    4.29
  -2  14  -4    4.48    3.39
   2 -14   6 1478.00   86.43
  -2  14   6 1404.00   82.25
   2  14  -6 1469.00   86.07
  -2 -14  -6 1529.00   89.42
   2  14   6 1329.00   77.82
  -2 -14   6 1516.00   88.86
   2 -14  -6 1535.00   89.85
  -2  14  -6 1401.00   82.04
   2 -14   8   72.89    6.31
   2  14  -8   77.89    6.83
  -2 -14  -8   70.61    6.30
   2  14   8   81.05    6.58
  -2 -14   8   79.03    7.01
  -2  14  -8   76.98    6.88
   2 -14  10  791.60   46.85
  -2  14  10  923.50   54.52
   2  14 -10  931.60   55.09
  -2 -14 -10  820.50   48.48
  -2 -14  10  881.00   52.13
   2 -14 -10  905.80   53.52
  -2  14 -10  874.00   51.53
   2 -14  12   -0.56    3.02
  -2  14  12    1.54    4.09
   2  14 -12    0.62    4.19
  -2 -14 -12   -0.29    3.00
   2  14  12   -0.38    2.90
  -2 -14  12    2.95    3.03
   2 -14 -12    3.44    4.01
  -2  14 -12   -2.99    3.47
   2 -14  14  678.40   40.28
  -2  14  14  693.90   41.28
   2  14 -14  641.70   38.36
  -2 -14 -14  653.80   38.83
   2  14  14  658.80   39.05
  -2 -14  14  697.70   41.60
   2 -14 -14  732.40   43.47
  -2  14 -14  693.00   41.10
   2 -14  16   36.08    4.50
  -2  14  16   29.40    4.20
   2  14 -16   25.28    4.51
  -2 -14 -16   28.35    3.93
   2  14  16   32.24    4.01
  -2 -14  16   28.95    4.46
   2 -14 -16   35.02    4.78
  -2  14 -16   38.28    4.33
   2 -14  18  332.20   20.35
  -2  14  18  328.90   20.37
   2  14 -18  308.50   19.21
  -2 -14 -18  318.20   19.47
   2  14  18  341.90   20.75
  -2 -14  18  349.20   21.35
   2 -14 -18  325.50   20.08
  -2  14 -18  335.20   20.56
   2 -14  20   25.46    3.65
  -2  14  20   23.38    4.21
   2  14 -20   20.74    4.17
  -2 -14 -20   25.66    3.52
   2  14  20   31.65    3.67
  -2 -14  20   26.74    4.19
   2 -14 -20   27.04    4.18
  -2  14 -20   36.65    4.00
   2 -14  22 1241.00   72.67
  -2  14  22 1246.00   72.87
   2  14 -22 1282.00   75.16
  -2 -14  22 1291.00   75.70
   2 -14 -22 1381.00   80.82
  -2  14 -22 1297.00   75.83
   2 -14  24   60.19    5.05
  -2  14  24   60.97    5.31
   2  14 -24   57.48    5.39
  -2 -14 -24   53.51    4.55
   2  14  24   48.58    4.55
  -2 -14  24   55.60    5.46
   2 -14 -24   49.45    4.94
  -2  14 -24   56.29    4.84
   2 -14  26   86.34    6.31
   2  14 -26   68.68    5.95
  -2 -14 -26   76.77    5.71
   2  14  26   78.57    5.86
  -2 -14  26   78.03    6.43
   2 -14 -26   77.56    6.13
  -2  14 -26   72.83    5.82
   2 -14  28    9.88    2.47
  -2  14  28    6.52    3.03
  -2 -14 -28    8.05    2.46
   2  14  28   11.51    2.40
  -2 -14  28    7.22    3.09
  -2 -14  28    6.18    3.84
   2 -14 -28    7.04    3.07
  -2  14 -28   10.94    2.63
   2 -14  30   42.57    4.26
  -2  14  30   29.85    3.64
  -2 -14 -30   34.89    3.37
   2  14  30   41.36    3.60
  -2 -14  30   37.81    4.21
  -2 -14  30   46.09    5.12
   2 -14 -30   40.84    4.54
  -2  14 -30   38.26    3.73
   2 -14  32    0.74    2.40
  -2  14  32    0.67    2.75
  -2 -14 -32    3.79    2.16
   2  14  32    6.94    2.29
  -2 -14  32    0.55    3.16
  -2 -14  32    0.53    3.00
   2 -14 -32    6.16    3.07
  -2  14 -32    2.25    2.52
   2 -14  34  300.30   18.20
  -2  14  34  254.10   15.90
   2  14  34  252.10   15.31
  -2 -14  34  261.60   16.41
  -2 -14  34  265.80   16.54
   2 -14 -34  267.00   16.60
  -2  14 -34  277.80   16.91
   2 -14  36  233.60   14.38
  -2  14  36  251.90   15.83
  -2 -14 -36  239.00   14.48
   2  14  36  234.10   14.20
  -2 -14  36  239.40   15.13
  -2 -14  36  233.50   14.84
   2 -14 -36  251.30   15.73
  -2  14 -36  245.90   15.06
   2 -14  38   10.25    2.63
  -2  14  38    1.58    2.73
  -2 -14 -38    7.69    1.85
   2  14  38    8.40    1.75
  -2 -14  38    7.60    3.26
  -2 -14  38   10.47    3.53
   2 -14 -38    6.42    3.16
  -2  14 -38   11.54    2.66
   2 -14  40   10.94    2.35
  -2  14  40   10.85    2.62
  -2 -14 -40   13.62    1.74
  -2 -14 -40   13.63    1.71
  -2 -14  40   14.99    3.13
  -2 -14  40   13.34    3.48
   2 -14 -40   15.24    2.99
  -2  14 -40   11.52    2.45
   2 -14  42    0.26    1.88
   2 -14  42   -1.99    1.94
  -2  14  42    0.46    2.50
  -2 -14  42    1.69    2.93
  -2 -14  42    2.48    2.87
   2 -14 -42    5.14    2.84
   2 -14  44    6.41    1.87
   2 -14  44    9.12    1.65
  -2 -14  44    7.72    3.39
  -2 -14  44   20.45    3.67
   2 -14 -44   16.41    2.98
  -2  14  46  192.10   12.17
  -2 -14  46  203.10   12.98
   2 -14 -46  185.90   11.90
  -2  14  48    3.18    2.80
  -2 -14  48    3.41    3.01
  -2 -14  48    2.52    2.88
   2 -14 -48    5.41    2.70
  -2  14  50   11.38    2.92
  -2 -14  50   11.10    3.14
  -2 -14  50   10.60    3.14
   2 -14 -50    7.21    2.58
  -2  14  52    9.85    2.66
  -2 -14  52   11.70    2.84
  -2 -14  52   10.40    3.16
   2 -14 -52   16.90    3.13
  -2  14  54   10.46    2.76
  -2  14  54   14.95    2.84
  -2 -14  54    8.29    2.86
  -2 -14  54   14.17    3.17
  -2  14  56    7.27    2.34
  -2  14  56    3.34    2.18
  -2 -14  56    7.61    3.04
  -2 -14  56    8.27    3.02
  -2 -14  58   -4.18    2.79
  -2 -14  58   -2.39    2.85
  -2 -14  60   17.11    2.75
  -2 -14  60   13.25    2.60
   2  16   0    0.77    4.37
  -2 -16   0   -4.02    3.14
   2 -16   0    3.69    4.34
  -2  16   0    0.27    4.78
   2 -16   2  140.80   10.41
  -2  16   2  152.50   10.48
   2  16  -2  139.70   10.29
  -2 -16  -2  115.40    8.84
   2  16   2  129.80    9.54
  -2 -16   2  130.00    9.57
   2 -16  -2  127.50    9.07
  -2  16  -2  136.00    9.60
   2 -16   4   52.93    5.91
  -2  16   4   47.35    5.00
   2  16  -4   45.23    5.83
  -2 -16  -4   50.38    4.99
   2  16   4   53.31    6.25
  -2 -16   4   51.50    6.05
   2 -16  -4   54.13    5.99
  -2  16  -4   52.35    6.14
   2 -16   6  692.40   41.27
  -2  16   6  669.90   39.86
   2  16  -6  577.60   34.65
  -2 -16  -6  681.10   40.55
   2  16   6  712.30   42.45
  -2 -16   6  682.00   40.76
   2 -16  -6  720.40   42.84
  -2  16  -6  686.70   41.02
   2 -16   8  405.30   24.83
  -2  16   8  430.00   26.18
   2  16  -8  414.80   25.37
  -2 -16  -8  482.40   29.00
   2  16   8  400.50   24.36
  -2 -16   8  424.20   25.85
   2 -16  -8  436.40   26.44
  -2  16  -8  384.70   23.66
   2 -16  10  367.60   22.59
  -2  16  10  369.90   22.94
   2  16 -10  377.60   23.23
  -2 -16 -10  351.30   21.52
   2  16  10  364.10   22.25
  -2 -16  10  335.00   21.03
   2 -16 -10  363.10   22.39
  -2  16 -10  349.20   21.51
   2 -16  12  243.90   15.50
  -2  16  12  246.40   15.56
   2  16 -12  225.90   14.49
  -2 -16 -12  208.70   13.50
   2  16  12  263.90   16.62
  -2 -16  12  231.70   14.99
  -2  16 -12  248.30   15.84
   2 -16  14    3.75    3.56
  -2  16  14    8.03    3.82
   2  16 -14   -2.01    3.39
  -2 -16 -14    0.46    3.51
   2  16  14   -2.61    3.44
  -2 -16  14    1.71    2.91
   2 -16 -14    2.13    2.70
  -2  16 -14    1.44    3.36
   2 -16  16  927.20   54.65
  -2  16  16  922.50   54.45
   2  16 -16  955.10   56.35
  -2 -16 -16  968.20   57.08
   2  16  16  975.30   57.39
  -2 -16  16  997.40   58.81
   2 -16 -16 1007.00   59.39
  -2  16 -16  971.40   57.20
   2 -16  18  119.40    8.55
  -2  16  18  130.50    9.33
   2  16 -18  127.80    9.19
  -2 -16 -18  137.00    9.33
   2  16  18  136.20    9.25
  -2 -16  18  130.90    9.10
   2 -16 -18  140.20    9.98
  -2  16 -18  128.80    9.14
   2 -16  20 2201.00  128.10
  -2  16  20 2219.00  129.20
   2  16 -20 2220.00  129.40
  -2 -16 -20 2138.00  124.50
   2  16  20 2364.00  137.50
  -2 -16  20 2206.00  128.50
   2 -16 -20 2194.00  127.80
  -2  16 -20 2185.00  127.20
   2 -16  22  433.40   26.12
  -2  16  22  423.20   25.41
   2  16 -22  460.10   27.83
   2  16  22  472.60   28.49
  -2 -16  22  444.30   26.95
   2 -16 -22  434.80   26.33
  -2  16 -22  468.20   28.14
   2 -16  24 1224.00   71.81
  -2  16  24 1188.00   69.72
   2  16 -24 1196.00   70.25
  -2 -16 -24 1210.00   70.80
   2  16  24 1285.00   75.30
  -2 -16  24 1227.00   72.07
   2 -16 -24 1225.00   71.82
  -2  16 -24 1239.00   72.54
   2 -16  26   85.32    6.69
  -2  16  26   82.76    6.42
   2  16 -26   88.69    7.17
  -2 -16 -26  102.00    7.28
   2  16  26   68.86    5.66
  -2  16 -26   80.92    6.32
   2 -16  28  403.60   24.29
  -2  16  28  385.10   23.59
   2  16 -28  419.80   25.55
  -2 -16 -28  413.60   24.87
   2  16  28  455.10   27.13
  -2 -16  28  437.40   26.66
   2 -16 -28  371.40   22.67
  -2  16 -28  429.90   25.85
   2 -16  30   66.77    5.30
  -2  16  30   76.19    6.25
  -2 -16 -30   76.07    5.74
   2  16  30   68.81    5.23
  -2 -16  30   70.29    6.11
   2 -16 -30   70.98    5.87
  -2  16 -30   72.47    5.68
   2 -16  32 1014.00   59.51
  -2  16  32 1101.00   64.57
  -2 -16 -32  916.90   53.76
   2  16  32 1109.00   64.88
  -2 -16  32 1001.00   58.79
  -2 -16  32  960.30   56.60
   2 -16 -32 1005.00   59.09
   2 -16  34   11.58    3.01
  -2  16  34   22.50    3.91
  -2 -16 -34   12.24    2.66
   2  16  34   12.95    2.89
  -2 -16  34   10.86    3.12
  -2 -16  34   11.90    3.61
   2 -16 -34   12.78    3.50
  -2  16 -34    9.80    2.84
   2 -16  36    4.64    2.80
  -2  16  36    2.21    3.03
  -2 -16 -36    3.41    2.43
   2  16  36    3.67    2.32
  -2 -16  36    8.56    3.31
  -2 -16  36   11.21    3.60
   2 -16 -36    7.30    3.16
  -2  16 -36    4.27    2.78
   2 -16  38   87.49    6.50
  -2  16  38   84.82    6.38
  -2 -16 -38   76.58    5.47
   2  16  38   74.02    5.18
  -2 -16  38   88.87    6.84
  -2 -16  38   92.50    7.14
   2 -16 -38   84.75    6.69
  -2  16 -38   86.72    6.34
   2 -16  40  143.50    9.35
  -2  16  40  143.00    9.57
  -2 -16 -40  166.10   10.30
   2  16  40  141.40    8.84
  -2 -16  40  187.60   12.12
  -2 -16  40  156.00   10.69
   2 -16 -40  158.40   10.58
  -2  16 -40  156.90   10.12
   2 -16  42   63.64    4.95
  -2  16  42   79.16    6.28
  -2 -16 -42   73.99    5.00
  -2 -16  42   80.76    6.34
  -2 -16  42   81.86    6.47
   2 -16 -42   75.72    6.11
  -2  16 -42   80.30    5.77
   2 -16  44   83.20    5.80
   2 -16  44   73.87    5.31
  -2  16  44   85.84    6.41
  -2 -16  44   87.91    6.65
  -2 -16  44   90.54    6.97
   2 -16 -44   91.51    6.86
   2 -16  46   91.44    6.17
   2 -16  46   91.33    6.12
  -2  16  46   83.86    6.29
  -2 -16  46   83.57    6.52
  -2 -16  46   79.72    6.31
   2 -16 -46   87.82    6.47
   2 -16  48   11.22    1.78
   2 -16  48   11.57    1.89
  -2  16  48   18.16    3.28
  -2 -16  48   12.17    3.31
  -2 -16  48   13.31    3.49
   2 -16 -48    9.54    3.12
  -2  16  50    4.05    2.68
  -2 -16  50    1.03    2.97
  -2 -16  50    0.88    3.13
   2 -16 -50    1.40    2.53
  -2  16  52   80.62    5.92
  -2 -16  52   70.88    5.66
  -2 -16  52   67.27    5.62
   2 -16 -52   76.69    5.68
  -2  16  54    6.53    3.08
  -2 -16  54    1.82    3.23
  -2 -16  54    5.94    2.89
   2 -16 -54    8.64    3.07
  -2  16  56   16.24    2.94
  -2  16  56   15.82    3.07
  -2 -16  56   18.53    3.51
  -2 -16  56   14.65    3.14
  -2 -16  58   -2.16    2.89
  -2 -16  58   -1.93    2.80
  -2 -16  60   16.43    3.97
  -2 -16  60   11.99    3.38
   2  18   0 1998.00  116.50
  -2 -18   0 2115.00  123.40
   2 -18   0 1864.00  108.90
  -2  18   0 1879.00  109.70
   2 -18   2   74.35    6.71
  -2  18   2   97.50    8.15
  -2 -18  -2   68.92    6.67
   2  18   2   69.20    5.90
  -2 -18   2   78.80    6.61
   2 -18  -2   81.14    7.29
  -2  18  -2   68.30    6.24
   2 -18   4 1146.00   67.45
  -2  18   4 1276.00   74.92
   2  18  -4 1071.00   63.10
  -2 -18  -4 1184.00   69.56
   2  18   4 1263.00   74.17
  -2 -18   4 1111.00   65.42
   2 -18  -4 1184.00   69.59
  -2  18  -4 1144.00   67.24
   2 -18   6    2.56    4.78
  -2  18   6   -1.34    4.26
   2  18  -6   -0.30    4.14
  -2 -18  -6    1.38    3.83
   2  18   6    3.56    4.21
  -2 -18   6   -2.34    4.35
   2 -18  -6    0.03    4.33
  -2  18  -6    6.26    4.25
   2 -18   8  152.90   10.75
  -2  18   8  165.50   11.48
  -2 -18  -8  156.10   10.81
   2  18   8  142.50    9.59
  -2 -18   8  165.60   11.63
   2 -18  -8  168.20   11.30
  -2  18  -8  140.40    9.95
   2 -18  10   36.24    4.74
  -2  18  10   38.39    5.08
   2  18 -10   39.71    5.45
  -2 -18 -10   36.48    4.78
  -2 -18  10   47.52    5.35
   2 -18 -10   44.45    5.03
  -2  18 -10   48.85    5.50
   2 -18  12   97.55    7.75
  -2  18  12  101.40    7.84
   2  18 -12   79.13    6.71
  -2 -18 -12   78.33    6.21
   2  18  12   93.17    7.39
  -2 -18  12   82.46    7.16
   2 -18 -12   84.05    7.12
  -2  18 -12   87.86    7.38
   2 -18  14    6.57    3.92
  -2  18  14    8.21    4.13
   2  18 -14    9.54    4.05
  -2 -18 -14    7.43    3.97
   2  18  14    6.90    3.60
  -2 -18  14    4.86    4.26
   2 -18 -14    5.91    3.99
  -2  18 -14    6.68    3.65
   2 -18  16    3.13    3.62
  -2  18  16    0.63    3.98
   2  18 -16    8.32    3.93
  -2 -18 -16    7.53    3.57
   2  18  16    4.19    3.25
  -2 -18  16    5.21    4.01
   2 -18 -16   -0.22    3.43
  -2  18 -16    2.94    3.67
   2 -18  18  130.40    9.29
  -2  18  18  136.30    9.83
   2  18 -18  135.40    9.73
  -2 -18 -18  119.10    8.42
  -2 -18  18  134.80    9.73
   2 -18 -18  142.80    9.97
  -2  18 -18  141.30    9.54
   2 -18  20  132.50    9.32
  -2  18  20  129.50    9.36
   2  18 -20  123.10    9.06
  -2 -18 -20  142.90    9.78
   2  18  20  122.70    8.56
  -2 -18  20  121.30    8.85
   2 -18 -20  127.60    9.21
  -2  18 -20  127.50    8.97
   2 -18  22    2.75    3.36
  -2  18  22    0.79    3.66
   2  18 -22    5.47    3.74
  -2 -18 -22   -4.41    3.10
   2  18  22    8.76    3.38
  -2 -18  22    7.74    3.27
   2 -18 -22    6.85    3.69
  -2  18 -22   -3.67    3.10
   2 -18  24  204.90   13.16
  -2  18  24  232.20   14.83
   2  18 -24  215.30   14.05
  -2 -18 -24  219.60   13.86
   2  18  24  192.10   12.47
  -2 -18  24  202.90   13.34
   2 -18 -24  207.70   13.51
  -2  18 -24  212.50   13.67
   2 -18  26   -3.86    3.48
  -2  18  26    1.38    4.13
   2  18 -26    3.23    3.65
  -2 -18 -26    0.48    2.80
   2  18  26    0.67    2.55
  -2 -18  26    2.59    3.69
   2 -18 -26    4.50    3.20
  -2  18 -26   -3.74    3.03
   2 -18  28   -4.23    3.22
  -2  18  28    3.10    3.97
   2  18 -28   -1.94    3.39
  -2 -18 -28    1.00    3.11
   2  18  28   -0.36    2.56
  -2 -18  28    1.00    3.43
   2 -18 -28    0.29    3.36
  -2  18 -28    3.54    3.10
   2 -18  30   39.12    4.16
  -2  18  30   38.10    4.18
   2  18 -30   44.35    4.84
  -2 -18 -30   47.51    4.33
   2  18  30   33.35    3.81
  -2 -18  30   41.39    4.88
   2 -18 -30   33.37    4.27
  -2  18 -30   35.79    4.22
   2 -18  32    1.47    2.76
  -2  18  32   -0.78    2.67
  -2 -18 -32    0.67    2.55
   2  18  32    1.75    2.78
  -2 -18  32    0.47    3.40
  -2 -18  32   -1.74    2.79
   2 -18 -32    2.55    3.20
  -2  18 -32    1.16    3.47
   2 -18  34   30.81    3.74
  -2  18  34   39.68    4.46
  -2 -18 -34   35.98    3.91
   2  18  34   28.77    3.88
  -2 -18  34   36.24    4.48
  -2 -18  34   36.42    4.24
   2 -18 -34   29.19    4.11
  -2  18 -34   32.26    3.92
   2 -18  36  318.80   19.48
  -2  18  36  322.10   20.01
   2  18  36  332.90   20.07
  -2 -18  36  327.00   20.32
  -2 -18  36  310.70   19.49
   2 -18 -36  254.80   16.08
  -2  18 -36  315.60   19.37
   2 -18  38   71.38    5.87
  -2  18  38   76.93    6.03
  -2 -18 -38   75.69    5.60
   2  18  38   66.53    5.16
  -2 -18  38   66.17    5.90
  -2 -18  38   69.34    6.07
   2 -18 -38   80.09    6.46
  -2  18 -38   66.89    5.66
   2 -18  40    3.59    2.80
  -2  18  40    8.99    3.14
  -2 -18 -40    2.42    2.48
   2  18  40    6.96    2.42
  -2 -18  40    1.37    3.07
  -2 -18  40    0.46    3.05
   2 -18 -40    7.28    3.24
  -2  18 -40    2.08    2.62
   2 -18  42  406.50   24.36
  -2  18  42  436.70   26.42
  -2 -18 -42  516.00   30.45
   2  18  42  437.20   25.92
  -2 -18  42  348.00   21.48
  -2 -18  42  420.90   25.57
   2 -18 -42  429.30   25.96
  -2  18 -42  434.30   26.04
   2 -18  44   97.92    6.90
  -2  18  44   98.28    7.05
  -2 -18 -44   99.48    6.51
   2  18  44   99.66    6.42
  -2 -18  44  100.40    7.63
  -2 -18  44  106.50    7.70
   2 -18 -44   98.50    7.28
  -2  18 -44  101.20    6.97
   2 -18  46  425.50   25.29
   2 -18  46  460.00   27.36
  -2 -18  46  393.60   24.00
  -2 -18  46  449.20   27.05
   2 -18  48   35.94    3.40
   2 -18  48   28.11    3.03
  -2  18  48   37.71    4.18
  -2 -18  48   39.03    4.64
  -2 -18  48   33.24    3.96
   2 -18 -48   28.98    3.71
   2 -18  50  527.50   31.11
   2 -18  50  490.70   28.90
  -2  18  50  472.80   28.20
  -2 -18  50  453.50   27.29
  -2 -18  50  500.20   30.01
   2 -18 -50  492.10   29.40
  -2  18  52    1.60    2.72
  -2 -18  52    3.64    3.05
  -2 -18  52   -0.80    3.03
   2 -18 -52    4.62    2.75
  -2  18  54  154.30   10.11
  -2 -18  54  195.80   12.55
  -2 -18  54  196.50   12.48
   2 -18 -54  181.30   11.45
  -2  18  56    4.61    2.93
  -2 -18  56    4.75    2.98
  -2 -18  56   -2.85    3.39
   2 -18 -56   -3.58    3.17
  -2  18  58   76.09    5.67
  -2  18  58   95.97    6.92
  -2 -18  58   98.31    7.17
  -2 -18  58   98.27    7.10
  -2 -18  60   81.79    6.32
  -2 -18  60   75.66    6.22
  -2 -18  62   28.83    3.87
  -2 -18  62   28.13    3.96
   2  20   0   -0.20    3.01
  -2 -20   0   -0.67    3.58
   2 -20   0   -5.15    4.44
  -2  20   0    1.73    4.39
   2 -20   2  155.60   11.09
  -2  20   2  169.00   12.06
   2  20  -2  159.80   11.01
  -2 -20  -2  126.00    9.59
   2  20   2  148.90   10.40
  -2 -20   2  143.00   10.20
   2 -20  -2  142.30   10.42
  -2  20  -2  138.60    9.68
   2 -20   4  223.40   15.27
  -2  20   4  199.20   13.41
  -2 -20  -4  195.70   12.90
   2  20   4  207.00   13.85
  -2 -20   4  189.10   12.76
   2 -20  -4  175.50   11.86
  -2  20  -4  192.10   13.01
   2 -20   6    6.39    4.49
  -2  20   6   -3.57    4.19
   2  20  -6   -2.93    4.51
  -2 -20  -6    1.71    4.35
   2  20   6    5.35    3.97
  -2 -20   6    0.65    4.68
   2 -20  -6    3.17    3.95
  -2  20  -6    5.26    3.29
   2 -20   8    3.30    4.22
  -2  20   8    0.00    3.28
   2  20  -8    9.65    4.66
  -2 -20  -8    5.28    3.91
   2  20   8    9.38    3.75
  -2 -20   8    7.89    4.23
   2 -20  -8    9.77    4.36
  -2  20  -8    5.35    4.41
   2 -20  10    5.46    4.21
  -2  20  10   17.24    5.04
   2  20 -10    5.29    3.89
  -2 -20 -10    3.41    3.04
   2  20  10   -4.70    3.33
  -2 -20  10    3.24    4.81
   2 -20 -10    7.09    4.36
  -2  20 -10    6.99    4.39
   2 -20  12   37.84    4.94
  -2  20  12   26.30    4.06
   2  20 -12   36.40    5.43
  -2 -20 -12   42.82    5.17
   2  20  12   40.85    5.09
  -2 -20  12   36.60    4.60
   2 -20 -12   46.28    5.24
  -2  20 -12   32.67    4.98
   2 -20  14   67.48    6.31
  -2  20  14   75.71    6.97
   2  20 -14   62.80    6.11
  -2 -20 -14   70.56    6.50
   2  20  14   74.04    6.49
  -2 -20  14   71.61    6.69
   2 -20 -14   78.72    6.59
  -2  20 -14   73.23    6.67
   2 -20  16   95.57    7.48
   2  20 -16  103.40    7.99
  -2 -20 -16  121.10    8.64
   2  20  16  106.10    7.84
  -2 -20  16  111.20    8.62
  -2  20 -16  128.90    9.16
   2 -20  18   70.70    6.28
  -2  20  18   76.48    7.16
   2  20 -18   77.61    6.80
  -2 -20 -18   71.58    6.25
   2  20  18   57.99    5.25
  -2 -20  18   69.58    6.50
   2 -20 -18   80.94    6.41
  -2  20 -18   76.13    6.54
   2 -20  20  209.40   13.78
  -2  20  20  213.50   13.94
   2  20 -20  221.10   14.52
  -2 -20 -20  204.40   13.28
   2  20  20  237.30   15.15
  -2 -20  20  212.90   14.11
   2 -20 -20  216.80   14.15
  -2  20 -20  212.90   13.83
   2 -20  22    8.49    3.83
  -2  20  22    4.18    2.84
   2  20 -22    0.06    3.84
  -2 -20 -22   -0.25    3.25
   2  20  22    2.14    3.35
  -2 -20  22    0.65    3.67
   2 -20 -22    4.99    3.86
  -2  20 -22   -1.09    3.50
   2 -20  24    1.59    3.75
  -2  20  24    8.53    4.26
   2  20 -24   -1.55    3.62
  -2 -20 -24   -2.32    3.10
   2  20  24   -2.42    3.16
  -2 -20  24    2.62    3.93
   2 -20 -24    2.33    3.62
  -2  20 -24   -1.13    3.37
   2 -20  26   14.47    3.65
  -2  20  26    4.27    3.75
   2  20 -26    5.07    3.61
  -2 -20 -26   12.36    2.93
   2  20  26   14.09    3.17
  -2 -20  26   10.11    3.46
   2 -20 -26   10.96    3.65
  -2  20 -26   11.58    3.64
   2 -20  28    8.98    4.05
  -2  20  28    8.46    3.65
   2  20 -28    8.45    3.72
  -2 -20 -28   10.71    3.16
   2  20  28    9.89    3.06
  -2 -20  28    2.99    3.47
   2 -20 -28   14.43    3.67
  -2  20 -28    7.28    3.35
   2 -20  30   39.54    4.65
  -2  20  30   40.78    4.34
   2  20 -30   28.23    4.45
  -2 -20 -30   49.33    4.84
   2  20  30   28.52    4.25
  -2 -20  30   40.05    5.08
   2 -20 -30   41.75    4.82
  -2  20 -30   45.94    4.90
   2 -20  32  483.10   29.09
  -2  20  32  534.50   32.01
   2  20 -32  495.30   29.98
  -2 -20 -32  508.80   30.44
   2  20  32  498.70   30.08
  -2 -20  32  462.70   28.16
   2 -20 -32  491.80   29.72
  -2  20 -32  485.60   29.24
   2 -20  34  117.50    8.46
  -2  20  34  110.50    8.38
   2  20 -34  140.70    9.68
  -2 -20 -34  112.80    7.92
   2  20  34  116.40    8.21
  -2 -20  34  112.60    8.44
   2 -20 -34   90.14    7.05
  -2  20 -34  109.30    7.96
   2 -20  36    4.63    2.95
  -2  20  36    9.77    3.69
  -2 -20 -36    1.17    3.00
   2  20  36    5.17    2.60
  -2 -20  36    4.23    3.87
  -2 -20  36    2.36    3.76
   2 -20 -36    5.55    3.37
  -2  20 -36    3.50    3.22
   2 -20  38   29.56    3.82
  -2  20  38   21.34    3.72
  -2 -20 -38   31.29    3.83
   2  20  38   23.56    3.33
  -2 -20  38   14.74    3.70
  -2  20 -38   24.65    3.97
   2 -20  40   43.83    4.43
  -2  20  40   34.95    4.64
  -2 -20 -40   47.97    4.48
   2  20  40   45.23    4.05
  -2 -20  40   49.51    5.16
  -2 -20  40   55.89    5.16
   2 -20 -40   51.51    5.13
  -2  20 -40   44.67    4.54
   2 -20  42   44.23    4.48
  -2  20  42   46.73    4.96
  -2 -20 -42   50.72    4.38
   2  20  42   41.29    3.77
  -2 -20  42   39.44    4.55
  -2 -20  42   46.87    5.13
   2 -20 -42   38.41    4.63
  -2  20 -42   36.75    4.22
   2 -20  44  106.30    7.47
  -2  20  44  102.70    7.59
  -2 -20 -44  109.80    7.25
   2  20  44  118.30    7.76
  -2 -20  44   97.96    7.26
  -2 -20  44  104.80    7.86
   2 -20 -44  115.00    8.19
  -2  20 -44  120.80    8.29
   2 -20  46    7.93    2.76
  -2  20  46   11.22    3.45
  -2 -20 -46   14.98    2.39
   2  20  46   11.58    2.37
  -2 -20  46    8.84    3.45
  -2 -20  46   12.13    3.70
   2 -20 -46    9.81    3.29
   2 -20  48    1.06    2.84
   2 -20  48    1.51    2.41
  -2  20  48   -0.33    3.06
  -2 -20 -48    1.78    1.60
  -2 -20 -48    0.53    1.47
  -2 -20  48   -0.27    3.00
  -2 -20  48    1.08    3.25
   2 -20 -48   -2.47    3.09
   2 -20  50   -1.42    2.38
   2 -20  50   -2.20    2.40
  -2  20  50   -1.04    2.48
  -2 -20  50   -0.32    3.42
  -2 -20  50    1.05    2.93
   2 -20 -50    1.38    2.97
   2 -20  52   45.01    3.85
   2 -20  52   47.14    3.79
  -2  20  52   42.05    4.37
  -2 -20  52   44.69    4.49
  -2 -20  52   44.29    4.51
   2 -20 -52   43.72    4.45
  -2  20  54   13.56    3.63
  -2 -20  54   10.41    3.47
  -2 -20  54   13.87    3.12
   2 -20 -54   12.08    2.99
  -2  20  56   -0.75    3.26
  -2 -20  56    2.79    3.17
  -2 -20  56    3.37    2.93
   2 -20 -56   -1.48    3.25
  -2  20  58    4.85    3.22
  -2 -20  58    9.82    3.51
  -2 -20  58    7.58    3.53
   2 -20 -58    8.16    3.54
  -2 -20  60    7.89    4.01
  -2 -20  60   17.10    3.85
  -2 -20  62    2.70    3.54
  -2 -20  62    1.43    3.51
   2  22   0  145.40   10.65
  -2 -22   0  160.20   11.03
   2 -22   0  130.60    9.62
  -2  22   0  162.70   11.78
   2 -22   2  917.20   54.34
  -2  22   2  960.30   56.96
   2  22  -2  906.20   53.90
  -2 -22  -2  948.50   56.16
   2  22   2 1013.00   59.94
  -2 -22   2  891.30   52.83
   2 -22  -2  949.90   56.22
  -2  22  -2  909.80   54.04
   2 -22   4   25.12    3.99
  -2  22   4   29.08    5.21
   2  22  -4   30.86    5.77
  -2 -22  -4   39.29    5.58
   2  22   4   32.29    4.38
  -2 -22   4   27.48    4.29
   2 -22  -4   39.55    4.78
  -2  22  -4   43.65    4.83
   2 -22   6  630.10   37.91
  -2  22   6  650.70   39.04
   2  22  -6  813.20   48.48
  -2 -22  -6  654.80   39.28
   2  22   6  692.80   41.37
  -2 -22   6  654.60   39.27
   2 -22  -6  636.70   38.29
  -2  22  -6  595.70   35.93
   2 -22   8   51.49    6.11
  -2  22   8   52.57    5.29
   2  22  -8   54.23    5.99
  -2 -22  -8   60.34    6.34
   2  22   8   45.79    5.20
  -2 -22   8   42.87    5.36
   2 -22  -8   44.18    5.16
  -2  22  -8   60.17    6.14
   2 -22  10  202.60   13.62
  -2  22  10  209.50   13.96
   2  22 -10  197.30   13.11
  -2 -22 -10  214.30   14.09
   2  22  10  187.60   12.94
  -2 -22  10  203.70   13.50
   2 -22 -10  202.60   13.59
  -2  22 -10  225.60   14.89
   2 -22  12  264.40   16.84
  -2  22  12  279.70   17.55
   2  22 -12  322.30   20.36
  -2 -22 -12  262.90   16.61
   2  22  12  279.00   17.92
  -2 -22  12  277.10   17.51
   2 -22 -12  292.70   18.36
  -2  22 -12  278.80   17.79
   2 -22  14   10.61    4.34
  -2  22  14    7.98    4.04
   2  22 -14    6.28    3.54
  -2 -22 -14    7.56    3.35
   2  22  14    9.52    4.09
  -2 -22  14    6.83    4.12
   2 -22 -14    8.23    4.28
  -2  22 -14    9.64    4.07
   2 -22  16    3.11    4.02
  -2  22  16    8.39    4.41
   2  22 -16    3.90    4.20
  -2 -22 -16   10.98    3.88
   2  22  16    5.03    3.77
  -2 -22  16   -3.81    4.11
   2 -22 -16    4.85    4.19
  -2  22 -16    1.73    3.90
   2 -22  18  159.10   11.01
  -2  22  18  164.30   11.32
   2  22 -18  179.20   12.26
  -2 -22 -18  171.80   11.55
   2  22  18  163.90   11.30
  -2 -22  18  160.60   11.23
   2 -22 -18  176.70   12.18
  -2  22 -18  164.20   11.39
  -2  22  20   39.94    4.69
   2  22 -20   49.67    5.20
  -2 -22 -20   56.43    5.75
   2  22  20   36.61    4.79
  -2 -22  20   41.01    5.19
   2 -22 -20   41.95    5.28
  -2  22 -20   38.48    4.77
   2 -22  22    2.38    3.92
  -2  22  22    1.16    2.55
   2  22 -22   -1.18    3.34
  -2 -22 -22   -0.53    2.50
   2  22  22    3.44    3.63
  -2 -22  22    2.39    3.01
   2 -22 -22    4.27    4.22
  -2  22 -22    2.47    3.61
   2 -22  24   82.52    7.06
  -2  22  24   78.38    6.96
   2  22 -24   68.89    6.22
  -2 -22 -24   73.20    6.05
   2  22  24   61.93    5.62
  -2 -22  24   81.74    7.23
   2 -22 -24   82.65    7.15
  -2  22 -24   75.92    6.60
   2 -22  26  327.80   20.36
  -2  22  26  335.50   20.97
   2  22 -26  309.80   19.40
   2  22  26  339.80   20.82
  -2 -22  26  337.20   20.83
   2 -22 -26  344.90   21.45
  -2  22 -26  342.40   21.25
   2 -22  28    5.67    3.48
  -2  22  28   -0.73    3.52
   2  22 -28    2.27    3.54
  -2 -22 -28    2.24    3.59
   2  22  28    3.87    3.43
  -2 -22  28    6.87    3.86
   2 -22 -28    7.44    3.89
  -2  22 -28    4.86    3.59
   2 -22  30  152.80   10.56
  -2  22  30  159.60   10.61
   2  22 -30  143.30   10.22
  -2 -22 -30  150.40   10.18
   2  22  30  152.60   10.53
  -2 -22  30  164.30   11.37
   2 -22 -30  138.40    9.94
  -2  22 -30  152.00   10.54
   2 -22  32    1.87    3.21
  -2  22  32    4.80    3.50
   2  22 -32   -1.48    3.66
  -2 -22 -32    5.76    3.11
   2  22  32    1.76    3.11
  -2 -22  32    8.47    3.67
   2 -22 -32    2.21    3.85
  -2  22 -32    5.10    3.60
   2 -22  34   77.55    6.32
  -2  22  34   64.84    6.12
   2  22 -34   64.54    5.90
  -2 -22 -34   68.51    5.65
   2  22  34   61.10    5.24
  -2 -22  34   68.72    6.12
   2 -22 -34   81.89    6.93
   2 -22  36   50.27    5.18
  -2  22  36   37.93    4.37
  -2 -22 -36   49.17    4.78
   2  22  36   35.28    4.29
  -2 -22  36   39.65    4.64
   2 -22 -36   47.14    5.16
  -2  22 -36   34.95    4.24
   2 -22  38  530.60   31.77
  -2  22  38  557.20   33.40
  -2 -22 -38  467.20   28.03
   2  22  38  508.70   30.47
  -2 -22  38  505.60   30.56
  -2 -22  38  529.60   31.70
   2 -22 -38  530.30   31.94
  -2  22 -38  521.40   31.34
   2 -22  40    3.19    3.42
  -2  22  40    7.10    3.61
  -2 -22 -40    5.44    3.40
   2  22  40    4.91    2.89
  -2 -22  40    3.01    3.43
  -2 -22  40    3.40    3.64
   2 -22 -40    6.34    3.33
  -2  22 -40    3.11    3.55
   2 -22  42  454.30   27.33
  -2 -22 -42  497.60   29.67
   2  22  42  487.00   29.16
  -2 -22  42  410.70   24.99
  -2 -22  42  460.00   27.88
   2 -22 -42  555.10   33.22
  -2  22 -42  455.30   27.42
   2 -22  44   65.06    5.54
  -2 -22 -44   72.37    5.52
   2  22  44   61.12    5.17
  -2 -22  44   77.22    6.57
  -2 -22  44   61.66    5.64
   2 -22 -44   69.67    5.91
  -2  22 -44   64.90    5.44
   2 -22  46   48.97    4.92
  -2  22  46   48.99    4.76
  -2 -22 -46   52.47    4.39
   2  22  46   53.61    4.47
  -2 -22  46   56.09    5.14
  -2 -22  46   53.65    5.49
   2 -22 -46   55.23    5.17
  -2  22 -46   49.17    4.72
   2 -22  48    9.34    2.93
   2 -22  48   14.22    3.29
  -2  22  48    6.16    3.09
  -2 -22 -48   10.37    2.35
   2  22  48    9.66    2.39
  -2 -22  48    7.54    3.55
  -2 -22  48   11.97    3.55
   2 -22 -48   11.40    3.46
   2 -22  50  356.20   21.43
   2 -22  50  394.80   23.92
  -2  22  50  389.40   23.49
  -2 -22  50  368.90   22.46
  -2 -22  50  336.90   20.56
   2 -22  52    8.12    2.69
   2 -22  52    9.13    3.25
  -2  22  52    4.91    3.67
  -2 -22  52    4.35    3.53
  -2 -22  52    1.27    3.15
   2 -22 -52    8.52    3.16
   2 -22  54   71.61    5.39
   2 -22  54   57.96    4.50
  -2  22  54   61.26    5.48
  -2 -22  54   59.94    5.18
  -2 -22  54   71.57    6.08
   2 -22 -54   73.96    6.14
  -2  22  56    6.30    3.48
  -2 -22  56    9.69    3.45
  -2 -22  56    7.31    3.44
   2 -22 -56    8.50    3.69
  -2  22  58   61.72    5.61
  -2 -22  58   72.95    6.19
  -2 -22  58   68.62    5.93
   2 -22 -58   56.52    5.56
  -2  22  60    1.79    2.79
  -2  22  60   -5.47    3.47
  -2 -22  60    3.00    4.11
  -2 -22  60   -3.52    4.00
   2  24   0   -5.29    3.38
  -2 -24   0   -2.35    4.66
   2 -24   0   -3.52    4.51
  -2  24   0    0.76    4.24
   2 -24   2  222.20   14.85
  -2  24   2  190.20   12.94
   2  24  -2  208.40   13.61
  -2 -24  -2  226.90   15.13
   2  24   2  212.20   14.26
   2 -24  -2  239.70   15.85
  -2  24  -2  205.00   13.53
   2 -24   4   84.91    7.25
  -2  24   4   83.25    6.88
   2  24  -4   86.15    7.11
  -2 -24  -4   92.41    7.91
   2  24   4   91.83    7.74
  -2 -24   4   92.54    8.19
   2 -24  -4   80.49    7.37
  -2  24  -4   74.03    6.29
   2 -24   6   29.93    4.86
  -2  24   6   52.99    6.21
  -2 -24  -6   36.54    4.54
   2  24   6   40.81    4.79
  -2 -24   6   47.24    5.17
   2 -24  -6   34.63    4.84
  -2  24  -6   34.59    5.56
   2 -24   8   27.71    4.83
  -2  24   8   20.64    4.93
   2  24  -8   24.13    4.51
  -2 -24  -8   14.93    4.71
   2  24   8   20.11    4.67
  -2 -24   8   29.47    5.30
   2 -24  -8   25.69    4.05
  -2  24  -8   23.56    4.64
   2 -24  10  160.50   11.21
  -2  24  10  166.70   11.42
   2  24 -10  184.20   12.73
  -2 -24 -10  156.10   10.67
   2  24  10  178.40   12.52
  -2 -24  10  171.70   11.71
   2 -24 -10  176.60   12.34
  -2  24 -10  180.60   12.45
   2 -24  12    9.24    3.95
  -2  24  12    4.71    3.86
   2  24 -12   -0.25    4.34
  -2 -24 -12   -5.71    3.49
   2  24  12    7.37    4.20
  -2 -24  12    0.86    4.30
   2 -24 -12    1.08    3.12
  -2  24 -12    5.95    3.16
   2 -24  14  229.60   15.03
  -2  24  14  253.20   16.59
   2  24 -14  231.30   15.03
  -2 -24 -14  234.50   15.21
   2  24  14  246.20   15.64
  -2 -24  14  207.70   13.94
   2 -24 -14  252.30   16.51
  -2  24 -14  229.00   14.77
   2 -24  16   46.02    5.72
  -2  24  16   50.47    6.12
   2  24 -16   52.05    5.90
  -2 -24 -16   54.23    5.55
   2  24  16   48.98    5.17
  -2 -24  16   55.49    5.99
   2 -24 -16   55.54    6.08
  -2  24 -16   45.98    5.34
   2 -24  18  112.10    8.89
  -2  24  18  113.20    8.76
   2  24 -18  115.70    8.82
   2  24  18  111.70    8.44
  -2 -24  18  106.70    8.44
   2 -24 -18  111.80    8.53
  -2  24 -18  113.00    8.68
   2 -24  20   90.99    7.55
  -2  24  20   72.85    6.59
   2  24 -20   87.43    7.21
   2  24  20   90.91    7.44
  -2 -24  20   72.46    6.74
  -2  24 -20   89.45    7.31
   2 -24  22    3.29    3.67
  -2  24  22    6.28    3.85
   2  24 -22    1.51    3.90
  -2 -24 -22    1.44    3.30
   2  24  22    3.82    3.26
  -2 -24  22   -4.86    4.00
   2 -24 -22    5.63    3.77
  -2  24 -22    7.06    3.74
   2 -24  24  215.10   14.14
  -2  24  24  218.90   14.49
   2  24 -24  225.00   14.86
  -2 -24 -24  240.30   15.40
   2  24  24  228.80   14.50
  -2 -24  24  223.50   14.50
  -2  24 -24  235.80   15.32
   2 -24  26  121.90    9.06
  -2  24  26  100.50    8.14
   2  24 -26  113.00    8.78
  -2 -24 -26   95.26    7.37
   2  24  26  111.90    8.05
  -2 -24  26  126.90    9.60
  -2  24 -26  112.00    8.36
   2 -24  28  196.40   12.98
  -2  24  28  226.10   14.41
   2  24 -28  216.10   14.36
  -2 -24 -28  240.70   15.42
   2  24  28  207.40   13.53
  -2 -24  28  215.90   14.02
   2 -24 -28  236.50   15.38
  -2  24 -28  200.30   13.25
   2 -24  30   15.30    4.39
  -2  24  30   13.14    3.61
   2  24 -30   10.22    4.16
  -2 -24 -30    6.33    3.71
   2  24  30    8.73    3.85
  -2 -24  30   14.78    4.25
   2 -24 -30   14.21    4.03
  -2  24 -30   12.27    3.99
   2 -24  32  277.80   17.67
  -2  24  32  286.70   18.22
   2  24 -32  280.60   17.97
  -2 -24 -32  285.10   17.71
   2  24  32  249.40   15.80
  -2 -24  32  288.90   18.42
   2 -24 -32  289.10   18.25
  -2  24 -32  297.00   18.67
   2 -24  34    2.32    3.42
  -2  24  34    2.79    3.95
   2  24 -34    1.65    3.49
  -2 -24 -34   -4.13    2.99
   2  24  34   -5.64    3.32
  -2 -24  34    0.74    3.75
   2 -24 -34   -2.61    3.47
  -2  24 -34    1.12    3.31
   2 -24  36  283.00   17.80
  -2  24  36  280.80   17.60
   2  24 -36  271.00   17.19
  -2 -24 -36  290.30   18.04
   2  24  36  272.20   17.17
  -2 -24  36  256.40   16.28
   2 -24 -36  245.40   15.80
  -2  24 -36  262.70   16.64
   2 -24  38  399.40   24.33
  -2 -24 -38  476.40   28.71
   2  24  38  402.30   24.27
  -2 -24  38  438.40   26.86
   2 -24 -38  426.70   25.93
  -2  24 -38  400.30   24.45
   2 -24  40  354.60   21.83
  -2  24  40  367.00   22.53
  -2 -24 -40  398.10   24.20
   2  24  40  358.80   21.78
  -2 -24  40  355.20   21.99
  -2 -24  40  339.50   21.02
   2 -24 -40  372.10   22.87
  -2  24 -40  343.00   21.19
   2 -24  42   67.82    5.88
  -2  24  42   91.25    7.16
  -2 -24 -42   73.60    5.97
   2  24  42   74.30    5.97
  -2 -24  42   72.51    6.01
  -2 -24  42   86.48    6.93
   2 -24 -42   68.83    5.99
  -2  24 -42   69.38    5.82
   2 -24  44   74.56    6.25
  -2  24  44   74.24    6.19
  -2 -24 -44   79.10    6.12
   2  24  44   62.28    5.33
  -2 -24  44   74.70    6.35
  -2 -24  44   72.79    6.46
   2 -24 -44   61.26    5.50
  -2  24 -44   65.87    5.68
   2 -24  46   95.70    7.23
  -2  24  46   99.35    7.43
  -2 -24 -46   91.58    6.57
   2  24  46   85.32    6.33
  -2 -24  46  100.70    7.63
  -2 -24  46  100.30    7.48
   2 -24 -46   91.48    7.24
  -2  24 -46   93.09    7.01
   2 -24  48   87.90    6.74
  -2 -24 -48  106.80    7.26
   2  24  48   89.69    6.47
  -2 -24  48   83.49    6.83
  -2 -24  48   92.47    7.25
   2 -24 -48   77.42    6.21
  -2  24 -48   92.31    6.84
   2 -24  50    3.26    3.42
   2 -24  50    4.36    3.28
  -2  24  50    5.65    3.37
  -2 -24 -50   -0.59    2.40
  -2 -24  50    2.31    3.33
  -2 -24  50    0.95    3.29
   2 -24 -50    6.12    3.45
   2 -24  52    0.82    3.00
   2 -24  52    0.93    3.28
  -2  24  52    2.98    3.04
  -2 -24  52    0.23    3.05
  -2 -24  52    4.68    3.28
   2 -24 -52    6.11    3.63
   2 -24  54   24.06    3.62
   2 -24  54   17.05    4.02
  -2  24  54   23.49    3.80
  -2 -24  54   22.30    4.15
  -2 -24  54   30.61    4.25
   2 -24 -54   26.51    4.13
   2 -24  56    3.98    2.73
   2 -24  56    1.68    2.61
  -2  24  56   -4.20    3.39
  -2 -24  56   -1.42    3.37
  -2 -24  56   -0.38    3.41
   2 -24 -56   -0.29    3.78
  -2  24  58   10.82    4.05
  -2 -24  58   15.68    3.82
  -2 -24  58    8.49    3.86
   2 -24 -58    6.80    3.84
   2  26   0  299.50   19.01
  -2 -26   0  368.30   23.09
   2 -26   0  363.90   22.78
  -2  26   0  341.10   21.34
   2 -26   2  108.50    8.69
  -2  26   2  112.00    8.79
   2  26  -2  116.10    8.95
  -2 -26  -2  128.80    9.89
   2  26   2  132.30   10.24
  -2 -26   2  120.40    9.38
  -2  26  -2  132.10    9.57
   2 -26   4   43.29    5.50
  -2  26   4   51.56    6.23
   2  26  -4   49.72    6.42
  -2 -26  -4   43.76    5.53
   2  26   4   31.69    5.42
  -2 -26   4   37.41    4.84
   2 -26  -4   37.25    5.55
  -2  26  -4   34.90    5.02
   2 -26   6   92.02    7.94
  -2  26   6   88.67    7.93
   2  26  -6   78.22    7.43
  -2 -26  -6   87.79    7.10
   2  26   6   82.02    7.02
  -2 -26   6   70.01    7.01
   2 -26  -6   75.08    7.14
  -2  26  -6   81.05    7.53
   2 -26   8   34.23    5.31
  -2  26   8   20.79    4.78
   2  26  -8   32.73    5.18
  -2 -26  -8   31.62    5.28
   2  26   8   20.19    4.66
  -2 -26   8   29.68    4.97
   2 -26  -8   26.88    5.05
  -2  26  -8   28.31    4.94
   2 -26  10   59.61    6.43
  -2  26  10   70.14    6.74
   2  26 -10   66.35    6.30
  -2 -26 -10   65.29    5.77
   2  26  10   65.46    6.95
  -2 -26  10   63.63    6.68
   2 -26 -10   61.31    5.77
  -2  26 -10   63.60    6.05
   2 -26  12    4.83    4.36
  -2  26  12    7.69    4.58
   2  26 -12   10.38    4.36
  -2 -26 -12    5.63    4.20
   2  26  12    3.13    4.31
  -2 -26  12    7.71    3.48
   2 -26 -12    8.31    4.62
  -2  26 -12   14.17    4.27
   2 -26  14  142.70   10.32
  -2  26  14  161.20   11.21
   2  26 -14  182.40   12.57
  -2 -26 -14  152.60   10.80
   2  26  14  162.90   11.25
  -2 -26  14  146.90   10.60
   2 -26 -14  146.90   10.50
  -2  26 -14  156.50   11.11
   2 -26  16    5.40    4.16
  -2  26  16   11.28    3.56
   2  26 -16   12.59    4.14
  -2 -26 -16   16.62    4.37
   2  26  16   13.63    4.04
  -2 -26  16   10.24    4.49
   2 -26 -16   10.54    4.49
  -2  26 -16   13.34    3.90
   2 -26  18  104.10    8.28
  -2  26  18  116.80    8.49
   2  26 -18  123.60    9.39
  -2 -26 -18  134.30    9.86
   2  26  18  110.20    8.65
  -2 -26  18  119.80    9.39
   2 -26 -18   96.86    7.99
  -2  26 -18  116.90    8.58
   2 -26  20   30.55    5.18
  -2  26  20   19.60    3.50
   2  26 -20   25.36    4.24
  -2 -26 -20   17.17    4.30
   2  26  20   22.84    4.79
  -2 -26  20   15.57    4.59
   2 -26 -20   22.67    4.20
  -2  26 -20   23.14    3.75
   2 -26  22   65.37    6.26
  -2  26  22   65.64    6.25
   2  26 -22   71.44    6.60
  -2 -26 -22   70.76    6.40
   2  26  22   83.01    6.92
  -2 -26  22   71.78    6.28
   2 -26 -22   83.97    7.18
  -2  26 -22   78.16    6.57
   2 -26  24   15.45    4.31
  -2  26  24   12.86    4.61
   2  26 -24    4.81    4.28
  -2 -26 -24    9.30    3.51
   2  26  24   11.05    3.69
  -2 -26  24    7.65    4.51
   2 -26 -24   15.81    4.31
  -2  26 -24   11.91    4.21
   2 -26  26   26.45    4.61
  -2  26  26   36.35    4.48
   2  26 -26   45.26    5.61
  -2 -26 -26   42.63    5.18
   2  26  26   43.35    4.95
  -2 -26  26   41.92    5.68
   2 -26 -26   45.82    5.39
  -2  26 -26   42.51    5.22
   2 -26  28    3.58    4.15
  -2  26  28    4.96    3.83
   2  26 -28    4.13    4.02
  -2 -26 -28    5.24    3.95
   2  26  28   11.35    3.95
  -2 -26  28    6.43    4.34
   2 -26 -28    4.14    3.93
  -2  26 -28    5.23    3.70
   2 -26  30   76.93    7.05
  -2  26  30   79.18    6.60
   2  26 -30   67.20    6.34
  -2 -26 -30   83.10    7.24
   2  26  30   77.99    6.70
  -2 -26  30   66.23    6.27
   2 -26 -30   75.64    6.79
  -2  26 -30   61.11    6.07
   2 -26  32   -0.30    3.66
  -2  26  32   -0.16    3.61
   2  26 -32    4.99    4.06
  -2 -26 -32    2.22    3.32
   2  26  32    1.49    3.28
  -2 -26  32    3.87    4.06
   2 -26 -32    2.78    3.68
  -2  26 -32    2.71    3.76
   2 -26  34   10.69    3.75
  -2  26  34    9.85    3.62
   2  26 -34   10.53    4.13
  -2 -26 -34   14.17    3.74
   2  26  34   11.82    3.86
  -2 -26  34   13.90    4.47
   2 -26 -34   13.37    3.96
  -2  26 -34   10.89    3.88
   2 -26  36   81.60    6.91
  -2  26  36   81.07    6.40
   2  26 -36   82.81    6.82
  -2 -26 -36   74.94    6.28
   2  26  36   83.37    6.85
  -2 -26  36   75.46    6.72
   2 -26 -36   78.54    6.89
  -2  26 -36   87.66    7.24
   2 -26  38  319.40   19.78
  -2  26  38  270.90   17.30
   2  26 -38  280.00   17.67
  -2 -26 -38  321.00   19.90
   2  26  38  233.50   14.72
  -2 -26  38  286.60   18.16
   2 -26 -38  293.70   18.31
  -2  26 -38  256.90   16.29
   2 -26  40   -0.96    3.23
  -2  26  40    3.22    3.47
  -2 -26 -40   -2.07    3.49
   2  26  40    1.89    3.40
  -2 -26  40   -1.12    3.73
  -2 -26  40    4.00    3.47
   2 -26 -40   -2.48    3.40
  -2  26 -40   -6.62    3.45
   2 -26  42  111.30    8.18
  -2  26  42  102.00    7.74
  -2 -26 -42  104.00    7.79
   2  26  42  106.20    7.70
  -2 -26  42  124.50    9.15
  -2 -26  42  109.20    7.97
   2 -26 -42  112.00    8.20
  -2  26 -42  113.80    8.27
   2 -26  44   -3.08    3.24
  -2  26  44    1.02    3.42
  -2 -26 -44   -2.61    3.01
   2  26  44    3.13    3.18
  -2 -26  44   -3.59    3.59
  -2 -26  44    1.00    3.53
   2 -26 -44   -5.41    3.54
  -2  26 -44   -3.92    3.33
   2 -26  46    5.28    3.38
  -2  26  46    5.68    3.15
  -2 -26 -46    0.32    2.96
   2  26  46    3.86    3.52
  -2 -26  46    1.71    3.47
  -2 -26  46   -0.09    3.47
   2 -26 -46    0.86    3.70
  -2  26 -46    2.47    3.38
   2 -26  48    1.62    3.69
  -2  26  48    8.12    3.25
  -2 -26 -48   -2.13    2.85
   2  26  48    2.26    3.15
  -2 -26  48    6.19    3.47
  -2 -26  48   -1.45    3.43
   2 -26 -48    1.89    3.08
  -2  26 -48   -2.08    3.56
   2 -26  50  116.20    8.38
  -2  26  50  146.70    9.98
  -2 -26 -50  132.30    8.93
   2  26  50  150.90    9.95
  -2 -26  50  140.90    9.68
  -2 -26  50  147.10   10.11
   2 -26 -50  136.60    9.59
   2 -26  52    0.01    3.83
   2 -26  52   -2.17    3.18
  -2  26  52   -0.37    3.63
  -2 -26 -52   -0.57    2.70
  -2 -26 -52    1.21    3.24
  -2 -26  52    2.99    3.47
  -2 -26  52    1.68    3.44
   2 -26 -52    4.17    3.86
   2 -26  54   45.89    4.77
   2 -26  54   34.64    4.82
  -2  26  54   50.18    5.10
  -2 -26  54   47.40    5.29
  -2 -26  54   50.84    5.16
   2 -26 -54   44.87    5.28
   2 -26  56    3.48    3.27
   2 -26  56    6.03    3.68
  -2  26  56   -1.93    3.85
  -2 -26  56    2.16    3.76
  -2 -26  56   -4.16    3.62
   2 -26 -56    5.17    4.19
  -2  26  58   38.72    5.27
  -2 -26  58   55.51    5.52
   2 -26 -58   42.27    5.35
   2  28   0    1.14    3.12
  -2 -28   0   -1.12    4.12
   2 -28   0    3.65    4.45
  -2  28   0   -1.44    3.84
   2 -28   2  274.50   17.74
  -2  28   2  265.20   17.05
   2  28  -2  273.80   17.39
  -2 -28  -2  253.80   16.59
   2  28   2  298.10   19.13
  -2 -28   2  247.20   15.94
   2 -28  -2  256.40   16.80
  -2  28  -2  262.40   16.85
   2 -28   4   10.50    4.13
  -2  28   4    8.22    4.35
  -2 -28  -4    3.00    4.17
   2  28   4   11.85    4.17
  -2 -28   4    3.04    4.02
   2 -28  -4   14.28    4.64
  -2  28  -4   10.89    3.98
   2 -28   6   14.65    4.94
  -2  28   6    5.89    3.38
   2  28  -6    7.44    4.82
  -2 -28  -6   13.33    3.55
   2  28   6   11.82    4.49
  -2 -28   6    8.11    4.78
   2 -28  -6   16.05    4.93
  -2  28  -6    8.41    4.41
   2 -28   8  491.70   30.13
  -2  28   8  512.60   31.29
   2  28  -8  524.80   31.98
  -2 -28  -8  491.70   29.88
   2  28   8  448.20   27.40
  -2 -28   8  485.80   29.57
   2 -28  -8  497.50   30.48
  -2  28  -8  484.30   29.63
   2 -28  10    1.53    4.63
  -2  28  10    4.24    3.04
   2  28 -10    0.83    4.29
  -2 -28 -10    4.51    4.30
   2  28  10    5.20    4.57
  -2 -28  10    6.03    4.55
   2 -28 -10    6.28    4.04
  -2  28 -10   -0.64    3.07
   2 -28  12  156.10   11.34
  -2  28  12  166.00   11.60
   2  28 -12  164.50   11.58
  -2 -28 -12  149.20   10.35
   2  28  12  165.40   11.79
  -2 -28  12  149.30   10.96
   2 -28 -12  158.00   10.92
  -2  28 -12  160.40   11.30
   2 -28  14  317.60   20.20
  -2  28  14  326.00   20.76
   2  28 -14  280.00   17.85
  -2 -28 -14  317.70   20.07
   2  28  14  283.10   18.04
  -2 -28  14  312.60   19.92
   2 -28 -14  271.20   17.64
  -2  28 -14  307.70   19.34
   2 -28  16  201.90   13.69
  -2  28  16  210.10   14.31
   2  28 -16  192.10   13.19
  -2 -28 -16  202.50   13.63
   2  28  16  190.70   12.79
  -2 -28  16  178.80   12.14
   2 -28 -16  199.20   13.36
  -2  28 -16  196.10   13.37
   2 -28  18   61.96    6.39
  -2  28  18   48.05    5.87
   2  28 -18   62.95    6.24
   2  28  18   65.14    6.32
  -2 -28  18   58.21    5.64
   2 -28 -18   57.87    6.13
  -2  28 -18   74.74    6.79
   2 -28  20  762.60   45.64
  -2  28  20  812.70   48.28
   2  28 -20  766.30   45.75
  -2 -28 -20  826.20   49.13
   2  28  20  697.40   41.78
  -2 -28  20  785.40   46.91
   2 -28 -20  894.70   53.14
  -2  28 -20  777.60   46.29
   2 -28  22    8.39    4.79
  -2  28  22    6.24    4.42
   2  28 -22    0.02    3.35
  -2 -28 -22   -0.78    3.86
   2  28  22    3.05    3.74
  -2 -28  22    2.03    4.55
   2 -28 -22    4.24    4.04
  -2  28 -22    3.27    3.39
   2 -28  24  351.60   21.94
  -2  28  24  327.90   20.71
   2  28 -24  350.90   22.00
  -2 -28 -24  350.20   21.71
   2  28  24  359.90   21.96
  -2 -28  24  343.30   21.72
   2 -28 -24  337.60   21.09
  -2  28 -24  333.40   20.90
   2 -28  26   37.05    5.04
  -2  28  26   37.31    5.32
   2  28 -26   37.96    5.43
  -2 -28 -26   49.11    5.57
   2  28  26   38.03    4.84
  -2 -28  26   45.20    4.93
   2 -28 -26   40.43    5.18
  -2  28 -26   46.65    5.55
   2 -28  28  237.60   15.47
   2  28 -28  276.90   17.87
  -2 -28 -28  242.50   15.72
   2  28  28  290.40   18.42
  -2 -28  28  270.10   17.46
   2 -28 -28  296.20   18.75
  -2  28 -28  284.10   18.18
   2 -28  30   -2.32    3.84
  -2  28  30   -3.25    3.82
   2  28 -30    3.38    3.67
  -2 -28 -30    5.40    3.75
   2  28  30    3.91    3.62
  -2 -28  30    0.05    3.01
   2 -28 -30   -2.34    3.80
  -2  28 -30    9.94    3.70
   2 -28  32  728.30   43.38
  -2  28  32  770.20   45.90
   2  28 -32  756.00   45.05
  -2 -28 -32  776.90   46.15
   2  28  32  757.60   44.91
  -2 -28  32  780.60   46.47
   2 -28 -32  701.30   41.89
  -2  28 -32  782.80   46.63
   2 -28  34    8.21    3.95
  -2  28  34    2.51    3.26
   2  28 -34    1.06    3.76
  -2 -28 -34    5.76    3.53
   2  28  34    1.38    3.64
  -2 -28  34    3.04    4.21
   2 -28 -34    2.34    3.63
  -2  28 -34    4.49    3.49
   2 -28  36   71.85    6.57
  -2  28  36   80.59    6.57
   2  28 -36   76.70    6.67
  -2 -28 -36   85.53    7.07
   2  28  36   76.88    6.47
  -2 -28  36   76.22    6.89
   2 -28 -36   74.37    6.64
  -2  28 -36   80.30    6.75
   2 -28  38  103.30    7.93
  -2  28  38   76.07    6.41
   2  28 -38   91.35    7.24
  -2 -28 -38   84.26    6.82
   2  28  38   82.97    6.85
  -2 -28  38   90.75    7.56
   2 -28 -38   82.36    6.99
  -2  28 -38   93.70    7.44
   2 -28  40  216.50   14.00
  -2  28  40  229.80   14.81
   2  28 -40  236.10   15.06
   2  28  40  213.30   13.65
  -2 -28  40  220.30   14.50
   2 -28 -40  245.20   15.62
  -2  28 -40  244.10   15.48
   2 -28  42   12.06    3.72
  -2  28  42    8.46    3.60
  -2 -28 -42   10.04    4.04
   2  28  42    9.76    3.47
  -2 -28  42    7.08    3.81
  -2 -28  42   15.23    4.12
   2 -28 -42   13.09    3.75
  -2  28 -42    4.57    3.71
   2 -28  44  127.40    9.01
  -2  28  44  111.80    8.14
  -2 -28 -44  133.70    9.55
   2  28  44  121.10    8.48
  -2 -28  44  116.50    8.44
  -2 -28  44  110.30    8.24
   2 -28 -44  143.20    9.93
  -2  28 -44  128.40    9.07
   2 -28  46   18.53    4.12
  -2  28  46   23.66    3.86
  -2 -28 -46   26.50    4.33
   2  28  46   25.89    4.07
  -2 -28  46   23.26    4.12
  -2 -28  46   16.76    4.00
   2 -28 -46   26.46    4.72
  -2  28 -46   23.55    4.24
   2 -28  48    9.62    4.12
  -2  28  48    9.11    4.19
  -2 -28 -48   11.38    3.52
   2  28  48   11.00    3.44
  -2 -28  48   13.12    3.77
  -2 -28  48    5.83    3.67
   2 -28 -48    2.51    3.98
  -2  28 -48    5.23    3.87
   2 -28  50    0.02    3.42
  -2  28  50    3.54    3.67
  -2 -28 -50    2.70    3.43
   2  28  50    2.89    3.35
  -2 -28  50    6.20    3.71
  -2 -28  50    4.03    3.65
   2 -28 -50    5.35    3.87
  -2  28 -50    4.93    3.76
   2 -28  52   28.99    4.02
   2 -28  52   26.23    4.68
  -2  28  52   22.29    4.44
  -2 -28 -52   21.02    3.79
   2  28  52   30.19    4.15
  -2 -28  52   32.94    4.46
  -2 -28  52   29.97    4.65
   2 -28 -52   30.56    4.68
   2 -28  54   -4.08    3.47
   2 -28  54    2.63    4.16
  -2  28  54   -0.80    3.95
  -2 -28 -54   -2.03    3.05
  -2 -28 -54   -0.77    3.16
  -2 -28  54   -1.47    3.75
  -2 -28  54   -3.78    3.42
   2 -28 -54    5.02    4.84
   2 -28  56   -1.52    3.92
   2 -28  56    4.33    3.90
  -2  28  56   -2.93    3.90
  -2 -28  56   -5.59    3.92
  -2 -28  56   -1.26    3.71
   2 -28 -56   -0.23    4.05
   2  30   0   82.05    7.50
  -2 -30   0   83.53    7.53
   2 -30   0   85.01    7.77
  -2  30   0   79.80    7.20
   2 -30   2 1961.00  114.70
  -2  30   2 2010.00  117.40
   2  30  -2 1991.00  116.30
  -2 -30  -2 2045.00  119.60
   2  30   2 2352.00  137.40
  -2 -30   2 2024.00  118.30
   2 -30  -2 2085.00  121.90
  -2  30  -2 2078.00  121.40
   2 -30   4   91.57    8.36
  -2  30   4   82.11    7.53
   2  30  -4   83.86    7.68
  -2 -30  -4   82.65    7.58
   2  30   4   85.36    7.32
  -2 -30   4  104.40    8.52
   2 -30  -4   75.55    7.30
  -2  30  -4   79.05    6.64
   2 -30   6 1176.00   69.42
  -2  30   6 1189.00   70.25
   2  30  -6 1275.00   75.22
  -2 -30  -6 1206.00   71.11
   2  30   6 1344.00   78.91
  -2 -30   6 1151.00   68.03
   2 -30  -6 1285.00   75.75
  -2  30  -6 1294.00   76.16
   2 -30   8    0.16    4.68
  -2  30   8    6.99    4.93
   2  30  -8    4.20    4.85
  -2 -30  -8    4.03    3.36
   2  30   8    6.75    4.58
  -2 -30   8    8.87    4.36
   2 -30  -8    5.95    4.76
  -2  30  -8    5.95    4.21
   2 -30  10  995.80   59.09
  -2  30  10 1010.00   59.73
   2  30 -10  938.30   55.78
  -2 -30 -10  965.00   57.21
  -2 -30  10  914.90   54.43
   2 -30 -10 1016.00   60.24
  -2  30 -10  946.50   56.16
   2 -30  12   93.16    8.13
  -2  30  12   83.94    6.90
   2  30 -12   91.21    8.12
  -2 -30 -12   86.04    7.46
   2  30  12   81.10    7.14
  -2 -30  12   96.01    8.49
   2 -30 -12   84.18    7.03
  -2  30 -12   99.38    8.19
   2 -30  14  592.80   35.86
  -2  30  14  634.20   38.36
   2  30 -14  542.40   32.92
  -2 -30 -14  560.60   33.86
   2  30  14  547.50   32.98
   2 -30 -14  643.50   38.78
  -2  30 -14  615.20   37.09
   2 -30  16    3.88    4.51
  -2  30  16    3.33    4.62
   2  30 -16    4.54    4.23
  -2 -30 -16    7.32    3.28
   2  30  16    2.51    3.68
  -2 -30  16    4.84    4.21
   2 -30 -16   -4.59    4.13
  -2  30 -16    3.36    3.88
   2 -30  18  102.30    8.64
  -2  30  18  124.10    9.48
   2  30 -18   97.25    8.31
  -2 -30 -18   95.48    7.88
   2  30  18   79.67    7.03
  -2 -30  18   87.11    7.64
   2 -30 -18   96.97    8.11
  -2  30 -18  111.30    8.89
   2 -30  20    8.31    4.49
  -2  30  20   16.08    4.37
   2  30 -20    8.42    3.70
  -2 -30 -20    8.24    4.19
   2  30  20    7.90    4.49
  -2 -30  20    7.35    4.56
   2 -30 -20    6.21    3.67
  -2  30 -20   12.70    4.09
   2 -30  22  165.60   11.74
  -2  30  22  179.80   12.29
   2  30 -22  163.70   11.71
  -2 -30 -22  164.50   11.42
   2  30  22  145.40   10.44
  -2 -30  22  189.00   13.28
   2 -30 -22  181.60   12.67
  -2  30 -22  158.90   10.92
   2 -30  24  108.30    8.70
  -2  30  24  114.10    8.79
   2  30 -24  102.90    8.26
  -2 -30 -24  121.30    9.08
   2  30  24  118.70    8.69
  -2 -30  24  117.80    9.46
   2 -30 -24   91.30    8.04
  -2  30 -24  109.90    8.19
   2 -30  26   39.32    5.25
  -2  30  26   34.60    5.35
   2  30 -26   39.17    5.40
  -2 -30 -26   42.63    4.77
   2  30  26   31.68    4.90
  -2 -30  26   34.89    4.56
   2 -30 -26   43.47    5.58
  -2  30 -26   35.32    4.70
   2 -30  28   -5.23    3.94
  -2  30  28    1.48    3.49
   2  30 -28    1.02    4.00
  -2 -30 -28    1.11    3.74
   2  30  28    3.49    4.22
  -2 -30  28   -3.84    4.36
   2 -30 -28    1.97    3.97
  -2  30 -28    3.27    3.73
   2 -30  30   63.35    6.22
   2  30 -30   60.62    6.05
  -2 -30 -30   61.50    5.87
   2  30  30   61.96    5.75
  -2 -30  30   72.93    6.71
   2 -30 -30   58.78    5.98
  -2  30 -30   52.83    5.91
   2 -30  32   -4.73    3.81
  -2  30  32   -1.33    4.01
   2  30 -32   -5.58    3.83
  -2 -30 -32    3.41    3.77
   2  30  32    0.24    3.58
  -2 -30  32    6.17    4.30
   2 -30 -32   -3.86    3.92
  -2  30 -32    3.45    3.76
   2 -30  34    4.97    3.95
  -2  30  34   -5.17    3.11
   2  30 -34    2.69    3.82
  -2 -30 -34   -5.23    3.51
   2  30  34   -3.48    3.82
  -2 -30  34    3.66    4.03
   2 -30 -34    2.55    3.65
  -2  30 -34    2.46    3.66
   2 -30  36  113.80    8.57
  -2  30  36  119.20    8.69
   2  30 -36  108.00    8.19
  -2 -30 -36  106.80    8.08
   2  30  36  117.70    8.69
  -2 -30  36  122.20    9.14
   2 -30 -36  115.40    8.74
  -2  30 -36  120.00    8.93
   2 -30  38    8.67    3.84
  -2  30  38   11.15    3.25
   2  30 -38    9.25    3.80
  -2 -30 -38    9.20    3.81
   2  30  38    4.76    3.52
  -2 -30  38    9.78    3.95
   2 -30 -38   -4.20    3.52
  -2  30 -38    6.08    3.55
   2 -30  40   -0.99    3.39
  -2  30  40    1.67    3.58
   2  30 -40    7.36    3.66
  -2 -30 -40    0.95    3.86
   2  30  40    1.25    3.57
  -2 -30  40    1.60    3.89
   2 -30 -40    1.77    4.26
  -2  30 -40   -0.30    3.46
   2 -30  42    5.28    3.65
  -2  30  42   -0.79    3.55
  -2 -30 -42    4.75    4.02
   2  30  42    6.18    3.67
  -2 -30  42    5.82    3.87
  -2 -30  42    3.50    3.47
   2 -30 -42    7.28    3.89
  -2  30 -42    4.69    3.37
   2 -30  44   39.71    4.60
  -2  30  44   38.81    4.32
  -2 -30 -44   45.61    5.25
   2  30  44   34.56    4.59
  -2 -30  44   45.94    5.42
  -2 -30  44   47.51    5.05
   2 -30 -44   49.17    5.62
  -2  30 -44   52.09    5.26
   2 -30  46    4.76    3.72
  -2  30  46   -0.50    3.81
  -2 -30 -46    5.21    3.90
   2  30  46    4.45    3.52
  -2 -30  46   -2.44    3.44
  -2 -30  46    6.82    3.91
   2 -30 -46    0.70    3.92
  -2  30 -46   -1.29    3.72
   2 -30  48   12.31    4.29
  -2  30  48   23.13    4.14
  -2 -30 -48    8.28    4.19
   2  30  48   20.41    3.96
  -2 -30  48    9.41    3.62
  -2 -30  48   19.88    4.00
   2 -30 -48   11.71    4.17
  -2  30 -48   20.98    4.06
   2 -30  50    7.06    3.82
  -2  30  50    5.26    3.75
  -2 -30 -50    7.58    3.78
   2  30  50    6.58    3.65
  -2 -30  50    6.02    3.55
  -2 -30  50    6.46    3.91
   2 -30 -50    6.55    3.99
  -2  30 -50    9.10    4.17
   2 -30  52    1.12    4.08
   2 -30  52   -2.06    2.96
  -2  30  52   -2.99    3.78
  -2 -30 -52    7.05    4.30
   2  30  52    4.83    3.86
  -2 -30  52    1.17    3.64
  -2 -30  52    3.28    3.68
   2 -30 -52    4.69    4.20
   2 -30  54    2.81    3.49
  -2  30  54   -0.74    4.02
  -2 -30 -54    3.05    4.03
  -2 -30  54   -3.81    3.70
  -2 -30  54    3.77    3.82
   2 -30 -54   -6.12    4.44
   2  32   0    1.76    4.87
  -2 -32   0    0.74    4.44
   2 -32   0   -4.43    3.14
  -2  32   0    3.17    3.32
   2 -32   2   20.26    4.81
  -2  32   2   20.46    4.79
   2  32  -2   27.98    4.93
  -2 -32  -2   20.81    5.10
   2  32   2   29.54    4.52
  -2 -32   2   22.75    4.17
   2 -32  -2   14.63    4.31
  -2  32  -2   30.94    4.47
   2 -32   4   -0.69    4.52
  -2  32   4   -7.59    4.25
   2  32  -4   -1.47    3.27
  -2 -32  -4    0.96    4.54
   2  32   4    2.15    4.47
  -2 -32   4    1.93    4.35
   2 -32  -4    3.73    4.62
  -2  32  -4    0.74    3.94
   2 -32   6    6.93    3.75
  -2  32   6   -4.03    3.91
   2  32  -6    5.28    4.57
  -2 -32  -6    3.78    4.73
   2  32   6    5.99    3.57
  -2 -32   6   11.37    4.86
   2 -32  -6    0.29    4.69
  -2  32  -6    3.85    4.04
   2 -32   8  389.50   24.29
  -2  32   8  356.80   22.39
   2  32  -8  412.40   25.62
  -2 -32  -8  355.10   22.40
   2  32   8  452.10   27.82
  -2 -32   8  337.40   21.31
   2 -32  -8  360.90   22.73
  -2  32  -8  377.00   23.43
   2 -32  10   14.02    5.04
  -2  32  10   12.25    4.37
   2  32 -10   20.12    5.01
  -2 -32 -10   13.83    3.71
   2  32  10   11.94    4.94
  -2 -32  10   23.08    5.03
   2 -32 -10   17.05    4.79
  -2  32 -10   21.54    3.95
   2 -32  12  108.40    8.80
  -2  32  12   97.84    7.66
   2  32 -12   87.19    7.92
  -2 -32 -12   90.33    7.65
   2  32  12  107.70    8.60
  -2 -32  12   96.03    8.50
   2 -32 -12   89.51    7.28
  -2  32 -12  109.20    8.86
   2 -32  14    1.37    4.27
  -2  32  14    6.47    4.34
   2  32 -14    0.55    3.93
  -2 -32 -14    0.06    4.21
   2  32  14    4.11    3.94
  -2 -32  14    2.74    4.74
   2 -32 -14   -0.58    3.99
  -2  32 -14    4.68    4.47
   2 -32  16    4.32    4.17
  -2  32  16   -2.33    4.11
   2  32 -16   -0.88    3.72
  -2 -32 -16    1.77    3.87
   2  32  16    1.52    4.08
  -2 -32  16    3.98    4.38
   2 -32 -16   -4.88    4.37
  -2  32 -16    3.45    3.59
   2 -32  18    0.07    4.12
  -2  32  18    3.67    4.13
   2  32 -18    2.57    4.47
  -2 -32 -18    0.21    3.05
   2  32  18    8.07    4.55
  -2 -32  18    1.40    4.33
   2 -32 -18    3.03    3.91
  -2  32 -18    4.20    4.38
   2 -32  20  222.80   14.89
  -2  32  20  221.70   14.59
   2  32 -20  219.60   14.69
  -2 -32 -20  216.10   14.33
   2  32  20  247.40   16.21
  -2 -32  20  237.90   15.85
   2 -32 -20  202.90   13.82
  -2  32 -20  220.60   14.78
   2 -32  22   21.90    4.88
  -2  32  22   29.47    4.43
   2  32 -22   25.14    4.88
  -2 -32 -22   21.73    4.63
   2  32  22   20.17    4.10
  -2 -32  22   15.96    5.09
   2 -32 -22   21.93    5.02
  -2  32 -22   21.76    3.88
   2 -32  24    6.74    4.41
  -2  32  24   14.13    4.86
   2  32 -24   20.79    4.89
  -2 -32 -24   14.19    4.25
   2  32  24   13.04    4.26
  -2 -32  24   12.74    4.61
   2 -32 -24   20.10    4.40
  -2  32 -24   18.56    4.43
   2 -32  26   23.29    4.18
  -2  32  26   24.94    4.77
   2  32 -26   21.66    4.80
  -2 -32 -26   21.64    4.41
   2  32  26   22.63    4.40
  -2 -32  26   34.33    5.08
   2 -32 -26   31.56    5.05
  -2  32 -26   25.53    4.70
   2 -32  28   22.43    4.63
  -2  32  28   23.04    3.95
   2  32 -28   17.24    4.47
  -2 -32 -28   20.42    4.31
   2  32  28   20.69    4.22
  -2 -32  28   19.88    5.01
   2 -32 -28   12.84    4.77
  -2  32 -28   21.70    4.13
   2 -32  30    0.31    3.70
  -2  32  30   -4.59    3.97
   2  32 -30    2.72    3.96
  -2 -32 -30   -3.91    3.79
   2  32  30   -7.21    3.78
  -2 -32  30    1.55    3.72
   2 -32 -30    6.90    4.09
  -2  32 -30    2.67    3.65
   2 -32  32   14.01    3.56
  -2  32  32   12.22    4.17
   2  32 -32   14.64    4.36
  -2 -32 -32   16.42    3.80
   2  32  32   18.54    4.48
  -2 -32  32   20.22    4.60
   2 -32 -32   15.19    4.15
  -2  32 -32   17.44    4.16
   2 -32  34    3.30    3.65
  -2  32  34    3.31    3.23
   2  32 -34    9.07    3.92
  -2 -32 -34    5.64    3.71
   2  32  34    6.97    3.86
  -2 -32  34    9.56    4.06
   2 -32 -34    3.16    3.64
  -2  32 -34   12.74    4.19
   2 -32  36  109.20    8.38
  -2  32  36  149.10   10.06
   2  32 -36  126.90    9.39
  -2 -32 -36  135.30    9.58
   2  32  36  122.20    9.03
  -2 -32  36  118.70    8.76
   2 -32 -36  111.20    8.32
  -2  32 -36  136.10    9.74
   2 -32  38   37.60    4.55
  -2  32  38   42.23    4.33
   2  32 -38   32.90    4.81
  -2 -32 -38   34.70    4.68
   2  32  38   29.80    4.33
  -2 -32  38   34.14    4.55
   2 -32 -38   32.48    4.75
  -2  32 -38   34.28    4.62
   2 -32  40   83.01    6.87
  -2  32  40   78.87    6.25
   2  32 -40   83.22    6.97
  -2 -32 -40   84.76    7.01
   2  32  40   71.30    6.37
  -2 -32  40   68.59    6.12
   2 -32 -40   78.63    6.86
  -2  32 -40   71.35    6.43
   2 -32  42    6.51    3.89
  -2  32  42    2.10    3.82
   2  32 -42    5.10    3.54
  -2 -32 -42   -4.59    4.11
   2  32  42    7.13    3.74
  -2 -32  42    1.71    3.41
   2 -32 -42    7.27    3.88
  -2  32 -42   14.71    4.10
   2 -32  44    4.70    3.61
  -2  32  44   10.06    4.08
  -2 -32 -44    5.58    4.24
   2  32  44   10.95    3.84
  -2 -32  44   12.11    3.81
  -2 -32  44   10.36    4.03
   2 -32 -44   12.25    3.95
  -2  32 -44    8.71    4.01
   2 -32  46   -0.11    4.27
  -2  32  46   -0.83    3.56
  -2 -32 -46   -2.59    4.01
   2  32  46    2.96    3.72
  -2 -32  46   -2.14    3.62
  -2 -32  46   -1.48    3.38
   2 -32 -46   -3.16    3.88
  -2  32 -46   -0.23    3.97
   2 -32  48   71.91    6.51
  -2  32  48   62.49    6.00
  -2 -32 -48   83.42    7.35
   2  32  48   71.07    6.27
  -2 -32  48   83.61    6.91
  -2 -32  48   76.07    6.28
   2 -32 -48   79.61    6.73
  -2  32 -48   77.95    6.68
   2 -32  50   -3.65    4.46
  -2  32  50   -3.06    3.89
  -2 -32 -50   -2.50    3.93
   2  32  50    0.93    3.75
  -2 -32  50    1.29    3.24
  -2 -32  50    6.38    3.59
   2 -32 -50    2.61    3.81
  -2  32 -50    2.65    4.09
   2 -32  52    0.97    3.90
  -2  32  52    4.21    4.18
  -2 -32 -52   -3.11    4.42
   2  32  52   -4.88    3.73
  -2 -32  52    5.72    4.11
  -2 -32  52   -2.74    3.69
   2 -32 -52   -2.43    4.35
  -2  32 -52    1.91    4.35
  -2  32  54    3.73    4.12
   2  34   0   45.49    5.11
   2 -34   0   38.75    5.80
  -2  34   0   44.70    5.08
   2 -34   2  326.20   20.65
  -2  34   2  376.10   23.29
   2  34  -2  422.70   26.33
  -2 -34  -2  359.80   22.58
   2  34   2  346.30   22.05
  -2 -34   2  336.70   21.29
   2 -34  -2  342.80   21.47
  -2  34  -2  282.30   18.35
   2 -34   4    3.90    3.29
  -2  34   4    6.46    4.49
   2  34  -4    3.58    4.44
  -2 -34  -4    4.64    3.39
   2  34   4   -0.32    3.23
  -2 -34   4    4.24    3.56
   2 -34  -4    2.41    3.34
  -2  34  -4    4.75    4.52
   2 -34   6   89.34    7.88
  -2 -34  -6   86.34    7.10
   2  34   6   98.95    8.29
  -2 -34   6   93.08    8.28
   2 -34  -6   79.60    7.03
  -2  34  -6  101.70    8.70
   2 -34   8    8.81    4.95
  -2  34   8   10.85    4.86
   2  34  -8    9.33    3.46
  -2 -34  -8    6.88    4.05
   2  34   8    4.20    4.69
  -2 -34   8    2.55    4.17
   2 -34  -8    8.15    4.02
  -2  34  -8    9.58    5.06
   2 -34  10  195.70   13.34
  -2  34  10  183.90   12.51
   2  34 -10  196.80   13.32
  -2 -34 -10  200.20   13.71
   2  34  10  180.40   12.45
  -2 -34  10  202.70   13.75
   2 -34 -10  195.80   13.22
  -2  34 -10  186.30   12.95
   2 -34  12   12.71    4.68
  -2  34  12   13.54    3.58
   2  34 -12    8.90    4.38
  -2 -34 -12   12.71    4.57
   2  34  12    8.00    4.40
  -2 -34  12    8.11    4.78
   2 -34 -12    9.30    3.49
  -2  34 -12   13.86    4.57
   2 -34  14   78.55    7.50
  -2  34  14   72.58    7.09
   2  34 -14   63.37    5.88
  -2 -34 -14   87.26    7.13
   2  34  14   84.83    7.24
  -2 -34  14   77.72    7.42
   2 -34 -14   83.96    7.38
  -2  34 -14   72.17    6.36
   2 -34  16   82.87    7.79
  -2  34  16   87.26    7.58
   2  34 -16   79.36    6.97
  -2 -34 -16   92.25    7.94
   2  34  16   87.96    7.48
  -2 -34  16   85.81    7.63
  -2  34 -16   66.42    6.81
   2 -34  18  120.30    9.51
  -2  34  18  106.90    8.28
   2  34 -18  114.40    9.09
  -2 -34 -18  121.80    8.94
   2  34  18  126.50    9.63
  -2 -34  18  117.80    9.17
   2 -34 -18  125.20    9.29
  -2  34 -18  120.10    9.14
   2 -34  20   71.44    7.02
  -2  34  20   65.98    6.18
   2  34 -20   65.74    6.58
  -2 -34 -20   82.24    7.06
   2  34  20   78.77    7.33
  -2 -34  20   61.79    6.58
  -2  34 -20   71.93    6.99
   2 -34  22  722.30   43.18
  -2  34  22  746.90   44.56
   2  34 -22  713.80   42.68
  -2 -34 -22  759.80   45.25
   2  34  22  720.30   42.99
  -2 -34  22  738.00   44.26
  -2  34 -22  759.80   45.37
   2 -34  24    7.61    4.24
  -2  34  24    7.54    4.21
   2  34 -24    2.85    4.52
  -2 -34 -24    7.71    4.17
   2  34  24   -1.10    3.40
  -2 -34  24    6.34    4.46
   2 -34 -24    2.07    4.53
  -2  34 -24    7.19    4.04
   2 -34  26  220.50   14.71
  -2  34  26  215.30   14.12
   2  34 -26  231.70   15.06
  -2 -34 -26  197.60   13.33
   2  34  26  214.00   14.20
  -2 -34  26  208.30   13.69
  -2  34 -26  229.00   15.21
   2 -34  28   20.32    4.47
  -2  34  28   17.80    3.97
   2  34 -28   16.09    4.71
  -2 -34 -28   31.11    4.82
   2  34  28   16.18    4.03
  -2 -34  28   17.85    4.87
   2 -34 -28   33.18    4.93
  -2  34 -28   20.59    4.55
   2 -34  30  269.40   17.22
  -2  34  30  215.30   14.25
   2  34 -30  268.90   17.20
  -2 -34 -30  230.50   14.86
   2  34  30  261.20   16.62
  -2 -34  30  256.20   16.24
   2 -34 -30  269.80   17.20
  -2  34 -30  243.40   15.77
   2 -34  32    4.08    4.08
  -2  34  32   -1.30    3.46
   2  34 -32    4.55    3.24
  -2 -34 -32    6.11    3.52
   2  34  32    4.41    3.80
  -2 -34  32    9.45    4.29
   2 -34 -32    8.62    3.91
  -2  34 -32   12.22    4.06
   2 -34  34  255.80   16.38
  -2  34  34  272.80   17.18
   2  34 -34  274.30   17.39
  -2 -34 -34  260.10   16.54
   2  34  34  281.40   17.74
  -2 -34  34  262.70   16.64
   2 -34 -34  271.50   17.15
  -2  34 -34  249.40   15.97
   2 -34  36   54.53    5.55
  -2  34  36   82.09    6.61
   2  34 -36   67.22    6.16
  -2 -34 -36   69.89    6.35
   2  34  36   82.61    7.03
  -2 -34  36   67.81    5.64
   2 -34 -36   59.09    5.77
  -2  34 -36   77.04    6.59
   2 -34  38    2.94    3.82
  -2  34  38    0.95    3.42
   2  34 -38    6.57    3.69
  -2 -34 -38    9.70    4.23
   2  34  38    4.09    3.68
  -2 -34  38   -4.80    3.42
   2 -34 -38    0.38    3.91
  -2  34 -38    4.99    3.68
   2 -34  40   22.07    4.33
  -2  34  40   17.93    4.30
   2  34 -40   30.02    4.53
  -2 -34 -40   33.24    5.09
   2  34  40   26.63    4.44
  -2 -34  40   24.06    4.25
   2 -34 -40   24.33    4.90
  -2  34 -40   27.26    4.49
   2 -34  42   -3.16    3.68
  -2  34  42    3.18    3.45
   2  34 -42   -0.10    3.58
  -2 -34 -42    2.70    3.91
   2  34  42   -2.43    3.73
  -2 -34  42    0.68    3.45
   2 -34 -42   -0.33    4.09
  -2  34 -42    0.73    3.79
   2 -34  44    0.61    3.62
  -2  34  44   -5.12    3.75
  -2 -34 -44   -3.53    4.30
   2  34  44   -1.43    3.75
  -2 -34  44    0.68    2.67
  -2 -34  44    1.77    3.33
   2 -34 -44   -2.62    3.69
  -2  34 -44    1.14    3.65
   2 -34  46    8.37    4.43
  -2  34  46   11.50    3.90
  -2 -34 -46    4.38    4.43
   2  34  46    7.94    4.18
  -2 -34  46    6.94    4.12
  -2 -34  46   12.90    3.91
   2 -34 -46   11.17    4.26
  -2  34 -46    5.93    3.73
   2 -34  48   32.09    4.99
  -2  34  48   28.07    4.50
  -2 -34 -48   32.80    5.57
   2  34  48   21.72    4.72
  -2 -34  48   24.93    3.90
  -2 -34  48   24.16    4.61
   2 -34 -48   22.88    4.25
  -2  34 -48   30.95    4.78
   2 -34  50   52.39    5.75
  -2  34  50   40.81    4.93
  -2 -34 -50   31.82    5.36
   2  34  50   61.75    5.97
  -2 -34  50   48.10    5.19
  -2 -34  50   39.47    5.08
   2 -34 -50   55.04    5.90
  -2  34 -50   50.08    5.88
  -2  34  52    5.38    4.19
   2  34  52    0.27    4.46
  -2 -34  52    3.28    4.58
   2  36   0   -1.36    5.16
  -2 -36   0   -1.46    4.07
   2 -36   0    1.51    3.25
  -2  36   0   -0.18    4.50
   2 -36   2  162.00   11.57
  -2  36   2  212.30   13.93
   2  36  -2  180.40   12.14
  -2 -36  -2  181.70   12.36
   2  36   2  184.70   12.57
  -2 -36   2  196.90   13.62
   2 -36  -2  175.00   12.35
  -2  36  -2  166.00   11.87
   2 -36   4    9.70    4.40
  -2  36   4    3.29    4.49
   2  36  -4   15.78    4.68
  -2 -36  -4    3.30    3.34
   2  36   4    1.75    4.42
  -2 -36   4   12.66    3.69
   2 -36  -4    6.40    4.60
  -2  36  -4    7.13    3.88
   2 -36   6   10.54    4.62
  -2  36   6   10.13    3.65
   2  36  -6    7.89    4.84
  -2 -36  -6   15.03    4.48
   2  36   6   12.74    3.82
  -2 -36   6    9.49    4.90
   2 -36  -6   13.51    4.34
  -2  36  -6   12.15    3.65
   2 -36   8  116.50    8.96
  -2  36   8  113.80    9.27
   2  36  -8  101.00    8.32
  -2 -36  -8  107.90    8.25
   2  36   8  115.70    9.08
  -2 -36   8  109.40    8.41
   2 -36  -8  114.90    8.95
  -2  36  -8   95.27    7.61
   2 -36  10  127.10    9.87
  -2  36  10  145.20   10.28
   2  36 -10  125.50    9.41
  -2 -36 -10  154.60   10.79
   2  36  10  159.20   11.66
  -2 -36  10  146.90   10.87
   2 -36 -10  124.50    9.44
  -2  36 -10  139.50    9.91
   2 -36  12   85.79    8.37
  -2  36  12   73.19    6.40
   2  36 -12   63.74    6.40
  -2 -36 -12   66.28    6.02
   2  36  12   43.76    5.76
  -2 -36  12   61.94    6.68
   2 -36 -12   56.71    6.04
  -2  36 -12   48.26    5.57
   2 -36  14    8.81    4.65
  -2  36  14    8.85    4.49
   2  36 -14   14.48    4.42
  -2 -36 -14    9.82    4.72
   2  36  14   10.46    4.25
  -2 -36  14   17.77    4.53
   2 -36 -14   10.51    4.58
  -2  36 -14   16.92    4.87
   2 -36  16  183.90   12.76
  -2  36  16  149.00   11.07
   2  36 -16  182.10   12.59
  -2 -36 -16  198.00   13.31
   2  36  16  165.60   11.61
  -2 -36  16  177.30   12.27
   2 -36 -16  177.10   12.36
  -2  36 -16  195.30   13.32
   2 -36  18   14.79    4.68
  -2  36  18   11.66    4.27
   2  36 -18    8.75    4.57
  -2 -36 -18   12.84    4.56
   2  36  18    8.78    4.47
  -2 -36  18   18.50    4.54
   2 -36 -18    8.23    4.28
  -2  36 -18   11.93    3.92
   2 -36  20  218.30   15.04
   2  36 -20  217.30   14.45
  -2 -36 -20  214.90   14.01
   2  36  20  185.70   12.40
  -2 -36  20  192.90   13.03
  -2  36 -20  200.40   13.73
   2 -36  22   58.72    6.63
  -2  36  22   57.10    5.70
   2  36 -22   57.04    5.81
  -2 -36 -22   54.28    6.02
   2  36  22   64.68    6.00
  -2 -36  22   57.13    6.12
  -2  36 -22   68.10    6.30
   2 -36  24  248.80   16.13
  -2  36  24  245.50   15.84
   2  36 -24  250.10   16.31
  -2 -36 -24  258.50   16.65
   2  36  24  250.90   16.35
  -2 -36  24  234.10   15.57
   2 -36 -24  257.30   16.82
  -2  36 -24  258.60   16.69
  -2  36  26   15.64    4.28
   2  36 -26   20.39    4.45
  -2 -36 -26    9.95    4.03
   2  36  26   11.69    4.27
  -2 -36  26   17.91    4.20
   2 -36 -26   18.67    4.32
  -2  36 -26   15.54    4.37
   2 -36  28   94.99    7.78
  -2  36  28  101.30    7.70
   2  36 -28  108.70    8.69
  -2 -36 -28  112.80    8.98
   2  36  28  115.20    8.58
  -2 -36  28   95.76    7.87
   2 -36 -28  101.60    7.97
  -2  36 -28  100.60    7.93
   2 -36  30    9.63    4.07
  -2  36  30    6.49    4.09
   2  36 -30    6.98    3.48
  -2 -36 -30    9.35    3.89
   2  36  30    9.32    4.22
  -2 -36  30    9.11    4.18
   2 -36 -30    4.71    4.13
  -2  36 -30    8.91    3.77
   2 -36  32   28.02    3.91
  -2  36  32   25.54    4.07
   2  36 -32   26.98    4.70
  -2 -36 -32   21.30    4.20
   2  36  32   32.47    4.69
  -2 -36  32   17.94    4.64
   2 -36 -32   26.67    4.66
  -2  36 -32   25.63    4.12
   2 -36  34   27.12    4.78
  -2  36  34   29.87    4.37
   2  36 -34   36.24    4.92
  -2 -36 -34   29.40    4.26
   2  36  34   25.75    4.50
  -2 -36  34   34.03    4.10
   2 -36 -34   26.62    4.82
  -2  36 -34   24.29    4.26
   2 -36  36    6.06    4.06
  -2  36  36    5.23    3.87
   2  36 -36    1.66    3.67
  -2 -36 -36    3.09    3.84
   2  36  36    4.83    3.93
  -2 -36  36    7.21    3.78
   2 -36 -36   10.57    4.25
  -2  36 -36    2.52    3.82
   2 -36  38   62.98    6.00
  -2  36  38   64.40    6.49
   2  36 -38   69.08    6.37
  -2 -36 -38   61.47    5.93
   2  36  38   63.92    6.08
  -2 -36  38   56.52    5.84
   2 -36 -38   61.86    6.52
  -2  36 -38   71.41    6.36
   2 -36  40   16.93    4.47
  -2  36  40   35.78    4.69
   2  36 -40   21.50    4.08
  -2 -36 -40   18.00    4.64
   2  36  40   28.76    4.35
  -2 -36  40   29.22    4.64
   2 -36 -40   34.83    5.36
  -2  36 -40   25.30    4.27
   2 -36  42   61.93    5.92
  -2  36  42   58.77    5.58
   2  36 -42   61.18    5.74
  -2 -36 -42   55.74    6.12
   2  36  42   67.45    6.18
  -2 -36  42   62.16    6.20
   2 -36 -42   61.36    6.02
  -2  36 -42   69.24    6.29
   2 -36  44    8.32    4.01
  -2  36  44   -0.07    3.41
  -2 -36 -44    4.63    4.22
   2  36  44    2.82    4.02
  -2 -36  44    3.18    4.11
  -2 -36  44   -1.56    3.20
   2 -36 -44   -2.56    3.53
  -2  36 -44    3.34    3.79
   2 -36  46   39.19    5.03
  -2  36  46   49.34    5.28
  -2 -36 -46   56.64    6.06
   2  36  46   42.53    5.44
  -2 -36  46   43.01    4.77
  -2 -36  46   48.88    5.31
   2 -36 -46   37.63    4.93
  -2  36 -46   39.84    5.10
   2 -36  48   25.31    4.87
  -2  36  48   23.76    4.19
  -2 -36 -48   20.12    4.70
   2  36  48   26.03    5.10
  -2 -36  48   15.58    3.64
  -2 -36  48   20.64    4.13
   2 -36 -48   23.00    4.58
  -2  36 -48   23.66    4.91
  -2  36  50   -5.90    4.45
   2  36  50    2.03    4.69
   2  38   0   -2.96    3.27
  -2 -38   0    5.42    3.41
   2 -38   0    0.07    4.68
  -2  38   0   -0.68    4.56
   2 -38   2  102.10    7.95
  -2  38   2   91.89    7.79
   2  38  -2  100.30    8.33
  -2 -38  -2  100.50    8.34
   2  38   2  121.70   10.24
  -2 -38   2   96.12    8.00
   2 -38  -2   88.17    7.26
  -2  38  -2  105.30    8.15
   2 -38   4    0.76    4.47
  -2  38   4    1.78    3.20
   2  38  -4    4.95    4.56
  -2 -38  -4   -2.16    4.55
   2  38   4   -4.05    3.72
  -2 -38   4    2.29    4.25
   2 -38  -4   -3.53    3.14
  -2  38  -4   -2.47    4.28
   2 -38   6   54.42    5.47
  -2  38   6   58.86    6.50
   2  38  -6   63.84    6.08
  -2 -38  -6   58.78    6.52
   2  38   6   44.90    5.43
  -2 -38   6   51.75    5.75
   2 -38  -6   59.80    6.47
  -2  38  -6   61.33    6.92
   2 -38   8    7.81    4.71
  -2  38   8   12.48    4.65
   2  38  -8   15.49    4.59
  -2 -38  -8    7.32    4.60
   2  38   8   10.10    4.99
  -2 -38   8   12.00    4.32
   2 -38  -8   17.57    4.86
  -2  38  -8   19.80    5.19
   2 -38  10   54.39    6.21
  -2  38  10   52.84    5.14
   2  38 -10   57.55    6.60
  -2 -38 -10   68.90    6.86
   2  38  10   59.70    6.87
  -2 -38  10   64.21    6.63
   2 -38 -10   68.88    6.95
  -2  38 -10   70.02    6.79
   2 -38  12   48.70    5.26
  -2  38  12   56.87    5.81
   2  38 -12   53.78    6.47
  -2 -38 -12   45.23    5.83
   2  38  12   51.26    5.98
  -2 -38  12   56.14    5.95
   2 -38 -12   52.29    6.17
  -2  38 -12   60.22    6.50
   2 -38  14    1.11    3.90
  -2  38  14    1.85    4.41
   2  38 -14    7.24    4.41
  -2 -38 -14    5.00    3.92
   2  38  14   -1.25    3.75
  -2 -38  14    0.58    3.28
   2 -38 -14    7.70    4.29
  -2  38 -14    0.70    4.09
   2 -38  16   17.72    4.18
  -2  38  16   12.35    4.56
   2  38 -16   13.47    4.76
  -2 -38 -16    5.98    3.20
   2  38  16    6.52    4.42
  -2 -38  16    8.60    3.45
   2 -38 -16    7.51    3.64
  -2  38 -16    7.41    3.32
   2 -38  18   -1.38    3.68
  -2  38  18   -4.88    4.02
   2  38 -18    6.45    4.34
  -2 -38 -18   -6.02    4.35
   2  38  18    9.41    4.61
  -2 -38  18   -0.82    3.09
   2 -38 -18    3.48    3.71
  -2  38 -18    0.80    4.13
   2 -38  20   43.78    5.26
  -2  38  20   49.39    5.92
   2  38 -20   58.91    6.03
   2  38  20   46.03    5.48
  -2 -38  20   47.28    5.01
   2 -38 -20   38.27    5.47
  -2  38 -20   50.34    5.88
   2 -38  22  115.80    8.83
  -2  38  22  133.80    9.93
   2  38 -22  133.60    9.76
  -2 -38 -22  124.00    9.26
   2  38  22  119.20    8.82
  -2 -38  22  107.90    8.06
   2 -38 -22   93.41    7.57
  -2  38 -22  124.90    9.22
   2 -38  24    0.86    4.34
  -2  38  24    9.81    3.29
   2  38 -24    4.27    4.41
  -2 -38 -24    9.64    4.17
   2  38  24    5.53    4.55
  -2 -38  24    1.85    4.41
   2 -38 -24    6.56    4.48
  -2  38 -24   -3.95    3.87
   2 -38  26   22.34    3.78
  -2  38  26   22.71    4.72
   2  38 -26   17.71    4.27
  -2 -38 -26   12.09    4.10
   2  38  26   18.49    4.15
  -2 -38  26   16.72    4.69
   2 -38 -26   13.42    3.45
  -2  38 -26   18.10    4.59
   2 -38  28   -0.80    4.01
  -2  38  28    2.47    3.01
   2  38 -28    5.56    4.23
  -2 -38 -28   -0.72    3.73
   2  38  28    3.22    4.14
  -2 -38  28    2.26    3.17
   2 -38 -28    0.52    4.02
  -2  38 -28    0.03    3.36
   2 -38  30   10.70    3.32
  -2  38  30   13.75    4.15
   2  38 -30   16.61    4.20
  -2 -38 -30   13.10    3.75
   2  38  30    2.88    3.57
  -2 -38  30   15.23    4.69
   2 -38 -30   13.91    4.61
  -2  38 -30   19.34    4.12
   2 -38  32   24.04    4.78
  -2  38  32   17.14    3.43
   2  38 -32   20.81    4.76
  -2 -38 -32   19.27    4.31
   2  38  32   15.93    4.10
  -2 -38  32   23.36    3.78
   2 -38 -32   17.18    4.48
  -2  38 -32   27.26    4.51
   2 -38  34  170.80   11.56
  -2  38  34  203.30   13.56
   2  38 -34  188.50   12.67
  -2 -38 -34  176.20   12.02
   2  38  34  203.80   13.32
  -2 -38  34  185.70   12.52
   2 -38 -34  176.40   11.97
  -2  38 -34  174.40   11.76
   2 -38  36   11.90    3.97
  -2  38  36   12.90    4.32
   2  38 -36   21.51    4.37
  -2 -38 -36   11.79    4.10
   2  38  36   14.95    4.03
  -2 -38  36   20.41    4.58
   2 -38 -36   17.25    4.20
  -2  38 -36   17.20    3.97
   2 -38  38    4.26    3.75
  -2  38  38    5.83    4.06
   2  38 -38    6.92    3.66
  -2 -38 -38    7.17    4.12
   2  38  38    3.18    3.68
  -2 -38  38    7.83    3.54
   2 -38 -38    1.78    3.88
  -2  38 -38    3.22    3.67
   2 -38  40    4.97    3.90
  -2  38  40    1.21    3.78
   2  38 -40    9.94    3.83
  -2 -38 -40    8.75    4.37
   2  38  40   -1.60    3.66
  -2 -38  40    6.65    3.57
   2 -38 -40    1.25    4.07
  -2  38 -40    0.03    3.77
   2 -38  42   47.63    5.63
  -2  38  42   55.09    5.59
   2  38 -42   49.43    5.05
  -2 -38 -42   54.41    5.94
   2  38  42   33.04    4.88
  -2 -38  42   49.12    5.31
   2 -38 -42   38.53    5.13
  -2  38 -42   54.11    5.70
   2 -38  44    0.84    3.95
  -2  38  44    6.56    3.72
   2  38 -44    7.96    3.62
  -2 -38 -44   -3.54    4.23
   2  38  44   -1.00    3.99
  -2 -38  44    7.46    3.68
   2 -38 -44   -0.51    3.59
  -2  38 -44    1.46    3.82
   2 -38  46   96.69    7.83
  -2  38  46  110.90    8.15
  -2 -38 -46  114.90    8.87
   2  38  46  112.80    8.39
  -2 -38  46  109.80    8.22
  -2 -38  46  109.20    7.76
  -2  38 -46  107.10    8.28
   2  40   0   -0.19    4.32
  -2 -40   0    1.18    4.50
   2 -40   0   -0.95    3.19
  -2  40   0    4.49    3.34
   2 -40   2  114.80    9.16
  -2  40   2  121.90    9.30
   2  40  -2  113.50    8.71
  -2 -40  -2  117.70    8.99
   2  40   2  117.30    9.14
   2 -40  -2  108.70    8.66
  -2  40  -2  117.80    9.11
   2 -40   4   29.45    4.24
  -2  40   4   21.66    3.63
   2  40  -4   34.84    5.06
  -2 -40  -4   28.71    4.23
   2  40   4   24.91    4.92
  -2 -40   4   35.81    5.58
   2 -40  -4   17.51    5.00
  -2  40  -4   26.03    4.88
   2 -40   6    9.69    4.67
  -2  40   6   -2.80    4.44
   2  40  -6    6.69    4.65
  -2 -40  -6    2.99    3.29
   2  40   6    8.27    4.89
  -2 -40   6    2.53    3.25
   2 -40  -6    5.89    4.06
  -2  40  -6    0.63    3.90
   2 -40   8   96.89    8.15
  -2  40   8   96.70    7.62
   2  40  -8  105.40    8.30
  -2 -40  -8  106.30    8.03
   2  40   8  121.40    9.34
  -2 -40   8   98.76    8.20
   2 -40  -8  110.20    8.35
  -2  40  -8   85.91    6.91
   2 -40  10    0.79    3.19
  -2  40  10    5.35    3.87
   2  40 -10   -0.02    3.79
  -2 -40 -10    0.95    3.05
   2  40  10   -0.78    3.81
  -2 -40  10    0.81    3.75
   2 -40 -10   -5.10    3.18
  -2  40 -10    0.61    3.09
   2 -40  12   -2.43    3.76
  -2  40  12   -2.52    4.16
   2  40 -12    1.10    3.84
  -2 -40 -12    6.41    3.28
   2  40  12    4.47    3.28
  -2 -40  12    0.78    3.13
   2 -40 -12    1.93    3.23
  -2  40 -12   -6.06    3.19
   2 -40  14  162.00   11.45
  -2  40  14  163.10   11.76
   2  40 -14  173.70   11.84
  -2 -40 -14  167.60   11.27
   2  40  14  175.30   11.74
  -2 -40  14  164.60   11.21
   2 -40 -14  157.80   11.02
  -2  40 -14  161.70   11.04
   2 -40  16   -3.71    4.20
  -2  40  16   -0.99    4.52
   2  40 -16    0.37    3.98
  -2 -40 -16   -0.62    4.19
   2  40  16    1.94    3.30
  -2 -40  16    0.53    3.94
   2 -40 -16    1.92    4.04
  -2  40 -16   -3.92    4.07
  -2  40  18   29.28    4.89
   2  40 -18   33.52    4.22
  -2 -40 -18   36.61    4.82
   2  40  18   29.35    4.62
  -2 -40  18   25.03    4.66
   2 -40 -18   27.67    5.03
  -2  40 -18   33.76    5.42
   2 -40  20  135.60    9.79
  -2  40  20  154.80   10.91
   2  40 -20  158.30   11.10
  -2 -40 -20  142.40   10.14
   2  40  20  144.50   10.41
  -2 -40  20  163.60   11.31
   2 -40 -20  144.50   10.42
  -2  40 -20  147.40   10.48
   2 -40  22    1.41    3.20
  -2  40  22   -1.37    4.30
   2  40 -22    1.75    4.23
  -2 -40 -22   -0.56    3.85
   2  40  22    7.47    4.61
  -2 -40  22   -2.84    3.03
   2 -40 -22    4.73    4.12
  -2  40 -22    1.65    3.96
   2 -40  24   49.69    5.86
  -2  40  24   41.92    4.58
   2  40 -24   46.00    5.66
  -2 -40 -24   46.54    5.50
   2  40  24   48.52    5.08
  -2 -40  24   45.57    4.88
   2 -40 -24   41.78    5.65
  -2  40 -24   51.06    5.62
   2 -40  26    6.47    4.55
  -2  40  26   10.22    4.14
   2  40 -26   -0.48    4.08
  -2 -40 -26    8.59    3.81
   2  40  26    9.16    4.25
  -2 -40  26    3.24    4.59
   2 -40 -26    3.89    4.20
  -2  40 -26    9.81    4.20
   2 -40  28   76.76    6.44
  -2  40  28   89.63    7.60
   2  40 -28   76.33    6.87
  -2 -40 -28   76.50    6.27
  -2 -40  28   80.63    7.10
   2 -40 -28   62.31    6.52
  -2  40 -28   84.04    7.10
   2 -40  30    3.17    4.16
  -2  40  30    7.42    3.60
   2  40 -30    3.37    3.61
  -2 -40 -30    2.40    3.52
   2  40  30    7.61    3.89
  -2 -40  30   -1.50    3.62
   2 -40 -30    1.91    4.09
  -2  40 -30    1.91    3.63
   2 -40  32  199.30   13.24
  -2  40  32  195.30   12.86
   2  40 -32  198.50   13.07
  -2 -40 -32  187.40   12.45
   2  40  32  188.00   12.55
  -2 -40  32  188.10   12.69
   2 -40 -32  185.70   12.53
  -2  40 -32  186.80   12.38
   2 -40  34   -1.00    3.07
  -2  40  34    1.73    3.95
   2  40 -34    0.05    3.11
  -2 -40 -34   -2.41    3.45
   2  40  34    1.10    4.09
  -2 -40  34   -0.54    4.03
   2 -40 -34    1.24    3.50
  -2  40 -34    4.73    3.78
   2 -40  36   25.40    4.66
  -2  40  36   24.03    4.43
   2  40 -36   29.58    4.65
  -2 -40 -36   21.48    4.62
   2  40  36   18.02    4.24
  -2 -40  36   25.56    3.88
   2 -40 -36   24.97    4.41
  -2  40 -36   34.12    4.76
   2 -40  38   29.62    4.94
  -2  40  38   29.74    4.27
   2  40 -38   25.45    4.56
  -2 -40 -38   32.98    4.73
   2  40  38   39.57    4.95
  -2 -40  38   28.06    4.44
   2 -40 -38   34.67    4.74
  -2  40 -38   30.37    4.53
   2 -40  40   68.01    6.25
  -2  40  40   68.22    5.91
   2  40 -40   68.34    6.01
  -2 -40 -40   67.45    6.24
   2  40  40   74.24    6.48
  -2 -40  40   66.80    6.23
   2 -40 -40   84.21    7.10
  -2  40 -40   72.17    6.43
   2 -40  42    6.61    3.39
  -2  40  42    2.19    3.58
   2  40 -42    3.14    3.66
  -2 -40 -42    1.22    4.36
   2  40  42    4.05    3.92
  -2 -40  42   -3.54    4.08
   2 -40 -42   -2.21    3.83
  -2  40 -42    7.21    4.00
   2 -40  44   31.58    4.92
  -2  40  44   33.29    4.47
   2  40 -44   34.15    4.85
  -2 -40 -44   29.81    5.87
   2  40  44   46.14    5.50
  -2 -40  44   37.64    4.81
   2 -40 -44   33.77    4.94
  -2  40 -44   42.45    5.02
   2  42   0   19.03    4.62
  -2 -42   0   18.16    4.51
   2 -42   0    9.73    4.05
  -2  42   0   15.39    4.93
   2 -42   2  296.10   18.81
  -2  42   2  272.60   17.42
   2  42  -2  265.70   17.02
  -2 -42  -2  278.20   17.64
  -2 -42   2  281.50   18.10
   2 -42  -2  262.90   17.01
   2 -42   4    1.89    3.70
  -2  42   4   -7.12    4.10
   2  42  -4    3.65    4.69
  -2 -42  -4    3.94    4.64
   2  42   4   -2.20    4.52
  -2 -42   4   -0.08    3.12
   2 -42  -4   -5.22    3.11
  -2  42  -4   -0.93    3.78
   2 -42   6  102.50    8.32
   2  42  -6   96.72    7.67
  -2 -42  -6   89.86    7.87
   2  42   6  102.30    8.08
  -2 -42   6   85.06    7.59
   2 -42  -6   79.66    6.90
  -2  42  -6   98.20    8.32
   2 -42   8    2.37    3.20
  -2  42   8    5.72    4.09
   2  42  -8    3.94    3.75
  -2 -42  -8    4.43    4.36
   2  42   8    3.92    3.08
  -2 -42   8    3.46    3.95
   2 -42  -8    3.23    4.39
  -2  42  -8    4.42    4.44
   2 -42  10  116.30    8.83
  -2  42  10  113.50    8.96
   2  42 -10  103.70    8.57
  -2 -42 -10  134.00    9.96
   2  42  10  114.20    8.94
   2 -42 -10  132.40   10.00
  -2  42 -10  144.40   10.64
   2 -42  12   25.44    5.09
  -2  42  12   35.18    4.92
   2  42 -12   40.05    5.43
  -2 -42 -12   35.20    5.31
   2  42  12   28.26    4.93
  -2 -42  12   31.04    4.88
   2 -42 -12   30.72    5.27
  -2  42 -12   35.62    5.50
   2 -42  14   49.65    5.89
  -2  42  14   58.82    5.94
   2  42 -14   60.38    6.34
  -2 -42 -14   48.28    5.74
   2  42  14   62.67    6.10
  -2 -42  14   65.82    6.61
   2 -42 -14   51.62    6.10
  -2  42 -14   70.53    6.79
   2 -42  16   15.78    4.68
  -2  42  16   12.17    4.12
   2  42 -16   13.81    4.57
  -2 -42 -16   12.41    4.15
   2  42  16   21.38    4.59
  -2 -42  16   14.94    4.60
   2 -42 -16   11.10    4.67
  -2  42 -16   10.22    4.57
   2 -42  18    3.91    4.43
  -2  42  18   -3.24    3.49
   2  42 -18    3.45    4.19
  -2 -42 -18    4.63    3.33
   2  42  18   -1.04    3.15
  -2 -42  18   -4.10    4.15
   2 -42 -18    4.82    4.15
  -2  42 -18    2.56    3.79
   2 -42  20   46.12    5.84
  -2  42  20   45.39    5.24
   2  42 -20   54.04    6.09
  -2 -42 -20   53.60    6.01
   2  42  20   47.43    5.16
  -2 -42  20   49.73    5.97
   2 -42 -20   48.17    5.28
  -2  42 -20   45.43    4.82
   2 -42  22   -1.98    3.64
  -2  42  22    0.79    4.34
   2  42 -22   -1.49    4.17
  -2 -42 -22   -0.84    4.12
   2  42  22    0.48    4.08
  -2 -42  22    5.15    4.36
   2 -42 -22    3.06    4.33
  -2  42 -22   -4.45    4.15
   2 -42  24    3.71    3.19
  -2  42  24    2.78    3.95
   2  42 -24    4.43    3.78
  -2 -42 -24    5.83    4.38
   2  42  24    0.44    3.33
  -2 -42  24    0.66    3.10
   2 -42 -24    2.31    4.28
  -2  42 -24   -2.87    3.91
   2 -42  26   30.18    5.05
   2  42 -26   34.20    4.73
  -2 -42 -26   34.30    4.44
   2  42  26   33.26    4.84
  -2 -42  26   30.08    4.14
   2 -42 -26   29.69    4.95
  -2  42 -26   30.71    4.91
   2 -42  28   31.38    4.38
  -2  42  28   35.93    5.00
   2  42 -28   40.09    5.12
  -2 -42 -28   28.00    4.27
   2  42  28   35.44    4.46
  -2 -42  28   26.98    5.13
   2 -42 -28   21.39    4.66
  -2  42 -28   29.90    4.51
   2 -42  30   42.71    5.65
  -2  42  30   37.27    4.74
   2  42 -30   37.88    4.19
  -2 -42 -30   36.02    5.05
   2  42  30   28.10    4.90
  -2 -42  30   37.06    4.24
   2 -42 -30   39.38    5.23
  -2  42 -30   22.14    5.22
   2 -42  32    7.93    3.22
  -2  42  32    8.60    4.12
   2  42 -32    8.56    4.14
  -2 -42 -32   11.88    4.35
   2  42  32   14.27    4.43
  -2 -42  32   15.41    4.33
   2 -42 -32    9.03    4.15
  -2  42 -32    7.47    3.97
   2 -42  34  122.20    9.01
   2  42 -34  111.70    8.10
  -2 -42 -34  121.70    9.12
   2  42  34  118.50    8.75
  -2 -42  34  131.40    9.08
   2 -42 -34  104.00    8.01
  -2  42 -34  126.60    9.11
   2 -42  36   25.91    4.80
  -2  42  36   31.21    4.41
   2  42 -36   31.06    4.61
  -2 -42 -36   29.41    4.70
   2  42  36   27.91    4.40
  -2 -42  36   27.64    4.74
   2 -42 -36   39.90    5.06
  -2  42 -36   28.18    4.28
   2 -42  38   84.40    7.11
  -2  42  38   76.22    6.48
   2  42 -38   97.15    7.76
  -2 -42 -38   89.30    7.23
   2  42  38   77.18    6.58
  -2 -42  38  100.20    7.94
   2 -42 -38   83.09    6.91
  -2  42 -38   86.81    6.95
   2 -42  40    5.89    4.00
  -2  42  40   16.25    3.95
   2  42 -40   10.57    3.92
  -2 -42 -40   18.08    4.42
   2  42  40   12.85    3.99
  -2 -42  40   16.60    4.36
   2 -42 -40   11.05    4.22
  -2  42 -40   16.76    4.32
   2 -42  42   98.96    8.16
  -2  42  42  106.60    8.05
   2  42 -42   98.53    7.82
   2  42  42  108.00    8.29
  -2 -42  42   86.42    7.00
  -2  42 -42   98.01    7.94
   2  44   0    3.55    3.45
  -2 -44   0    0.24    3.76
   2 -44   0    1.35    4.39
  -2  44   0    0.26    3.25
   2 -44   2    5.84    3.21
  -2  44   2    7.96    4.42
   2  44  -2   -3.95    4.45
  -2 -44  -2    6.18    4.51
   2  44   2   -0.77    3.82
  -2 -44   2    4.27    3.86
   2 -44  -2    3.46    3.04
  -2  44  -2    9.87    3.97
   2 -44   4   31.64    5.16
  -2  44   4   20.03    4.15
   2  44  -4   27.36    4.29
  -2 -44  -4   31.58    4.25
   2  44   4   35.55    5.33
  -2 -44   4   34.89    4.94
   2 -44  -4   28.93    4.49
  -2  44  -4   29.91    5.15
   2 -44   6    2.21    3.99
  -2  44   6    6.90    3.79
   2  44  -6   -0.11    3.63
  -2 -44  -6    9.21    3.35
   2  44   6   -2.31    3.43
  -2 -44   6   -1.23    3.87
   2 -44  -6    0.35    4.51
  -2  44  -6    7.38    3.66
   2 -44   8   14.78    3.61
  -2  44   8    8.62    4.33
   2  44  -8    9.69    4.53
  -2 -44  -8   10.72    4.08
   2  44   8    8.60    3.59
  -2 -44   8   13.01    3.61
   2 -44  -8    8.95    4.20
  -2  44  -8    7.52    3.28
   2 -44  10    5.65    4.46
  -2  44  10   13.18    4.03
   2  44 -10   19.38    4.59
  -2 -44 -10   15.02    4.18
   2  44  10    8.65    4.28
  -2 -44  10   16.59    4.75
   2 -44 -10   14.82    3.53
  -2  44 -10   12.56    4.30
   2 -44  12   30.08    5.19
  -2  44  12   38.03    4.27
   2  44 -12   23.69    4.15
  -2 -44 -12   30.41    4.69
   2  44  12   21.75    4.63
  -2 -44  12   27.79    5.38
   2 -44 -12   36.00    4.75
  -2  44 -12   24.38    4.59
   2 -44  14   25.19    4.90
  -2  44  14   14.17    3.76
   2  44 -14   17.23    4.42
  -2 -44 -14   13.66    3.44
   2  44  14   10.90    4.00
  -2 -44  14   14.37    4.41
   2 -44 -14   25.39    4.26
  -2  44 -14   14.82    4.38
   2 -44  16  183.80   12.54
  -2  44  16  176.00   11.97
   2  44 -16  179.90   12.04
  -2 -44 -16  172.00   11.54
   2  44  16  185.90   12.51
  -2 -44  16  187.30   12.77
   2 -44 -16  168.40   11.47
  -2  44 -16  180.10   12.17
   2 -44  18   28.45    4.95
  -2  44  18   24.72    4.18
   2  44 -18   28.28    4.63
  -2 -44 -18   31.19    5.05
   2  44  18   25.82    4.66
  -2 -44  18   32.11    4.95
   2 -44 -18   38.64    5.11
  -2  44 -18   24.82    3.77
   2 -44  20   31.58    4.96
  -2  44  20   23.80    3.59
   2  44 -20   28.99    4.47
  -2 -44 -20   25.80    5.04
  -2 -44  20   31.56    4.83
   2 -44 -20   44.46    5.44
  -2  44 -20   25.81    4.40
   2 -44  22   29.51    5.04
  -2  44  22   25.55    4.29
   2  44 -22   30.00    4.27
  -2 -44 -22   36.75    4.96
   2  44  22   35.57    4.89
  -2 -44  22   37.19    5.22
   2 -44 -22   35.95    5.15
  -2  44 -22   32.92    5.00
   2 -44  24  171.10   11.55
  -2  44  24  186.80   12.49
   2  44 -24  193.20   12.81
  -2 -44 -24  207.60   14.08
   2  44  24  223.20   14.47
  -2 -44  24  180.50   12.29
   2 -44 -24  206.40   13.62
  -2  44 -24  181.70   12.07
   2 -44  26    2.19    4.26
  -2  44  26    6.02    4.07
   2  44 -26    2.99    4.12
  -2 -44 -26    1.41    2.95
   2  44  26    9.24    3.83
  -2 -44  26    9.52    3.14
   2 -44 -26    0.59    4.20
  -2  44 -26    3.24    3.94
   2 -44  28   73.21    6.76
  -2  44  28   56.62    5.42
   2  44 -28   79.84    6.74
  -2 -44 -28   66.00    6.34
   2  44  28   81.24    7.04
  -2 -44  28   77.62    6.58
   2 -44 -28   95.02    7.74
  -2  44 -28   85.71    6.99
   2 -44  30   -1.62    3.74
  -2  44  30   -1.11    3.82
   2  44 -30   -1.63    3.53
  -2 -44 -30   -1.31    4.01
   2  44  30   -2.93    4.10
  -2 -44  30    4.36    4.08
   2 -44 -30    4.12    4.34
  -2  44 -30    2.39    4.08
   2 -44  32    3.66    3.41
  -2  44  32    0.63    3.45
   2  44 -32   -6.36    3.84
  -2 -44 -32    2.84    3.98
   2  44  32    1.91    3.67
  -2 -44  32    3.26    3.08
   2 -44 -32    1.93    3.92
  -2  44 -32    1.58    3.78
   2 -44  34    3.23    4.07
  -2  44  34   -4.10    3.51
   2  44 -34    3.15    3.73
  -2 -44 -34   -1.45    3.96
   2  44  34   -0.57    3.78
  -2 -44  34    1.27    4.08
   2 -44 -34   -2.64    3.62
  -2  44 -34   -4.95    3.65
   2 -44  36   14.91    4.11
  -2  44  36   14.64    4.15
   2  44 -36   21.16    4.29
  -2 -44 -36   13.50    4.35
   2  44  36   14.18    3.91
  -2 -44  36   13.72    4.21
   2 -44 -36    7.73    4.06
  -2  44 -36    9.42    3.83
   2 -44  38    6.19    3.57
  -2  44  38    7.56    3.79
   2  44 -38    5.29    4.07
  -2 -44 -38   12.03    4.29
   2  44  38    7.60    3.65
  -2 -44  38   12.61    3.27
   2 -44 -38   14.34    4.42
  -2  44 -38   10.04    4.08
   2  46   0   43.80    5.12
  -2 -46   0   42.21    5.42
   2 -46   0   37.50    5.42
  -2  46   0   44.66    5.25
   2 -46   2   87.48    6.95
  -2  46   2   93.75    7.32
   2  46  -2   89.36    7.47
  -2 -46  -2  103.40    7.67
   2  46   2   84.39    7.03
  -2 -46   2   85.26    7.22
   2 -46  -2   84.22    6.90
  -2  46  -2   89.89    7.49
   2 -46   4   10.90    4.48
  -2  46   4    9.41    4.14
   2  46  -4    9.93    3.51
  -2 -46  -4   -0.95    4.09
   2  46   4    1.01    3.23
  -2 -46   4   -2.24    4.26
   2 -46  -4    5.87    4.50
  -2  46  -4    1.63    2.98
   2 -46   6    9.56    3.40
  -2  46   6    3.41    4.39
   2  46  -6    7.66    4.21
  -2 -46  -6    4.33    4.32
   2  46   6    9.18    3.87
  -2 -46   6    8.44    3.38
   2 -46  -6   11.68    3.99
  -2  46  -6   13.45    4.42
   2 -46   8   -2.30    3.64
  -2  46   8    4.30    2.86
   2  46  -8    1.98    3.60
  -2 -46  -8    0.15    3.62
   2  46   8    6.66    3.92
  -2 -46   8    2.90    4.31
   2 -46  -8    0.44    2.93
  -2  46  -8   -0.60    4.43
   2 -46  10   14.84    4.75
  -2  46  10   12.63    3.87
   2  46 -10   21.74    4.22
  -2 -46 -10   17.06    3.55
   2  46  10   13.74    3.97
  -2 -46  10   20.46    4.40
   2 -46 -10   18.30    3.91
  -2  46 -10   22.06    4.46
   2 -46  12   64.87    6.55
  -2  46  12   71.00    6.66
   2  46 -12   51.58    5.89
   2  46  12   43.23    5.25
  -2 -46  12   54.21    5.30
   2 -46 -12   48.43    5.69
  -2  46 -12   49.77    5.26
   2 -46  14   11.15    4.29
  -2  46  14    2.87    4.08
   2  46 -14    6.06    4.03
  -2 -46 -14   10.56    4.22
   2  46  14   13.64    4.09
  -2 -46  14   10.26    3.40
   2 -46 -14    0.80    4.04
  -2  46 -14   11.10    3.56
   2 -46  16    0.17    3.92
  -2  46  16    3.79    3.95
   2  46 -16   -1.43    4.07
  -2 -46 -16    2.51    4.14
   2  46  16   -3.25    3.87
  -2 -46  16    0.14    3.04
   2 -46 -16    2.04    4.02
  -2  46 -16    6.00    3.47
   2 -46  18   39.99    5.33
  -2  46  18   40.84    5.20
   2  46 -18   34.14    4.90
  -2 -46 -18   31.58    5.11
   2  46  18   40.09    5.15
  -2 -46  18   36.41    4.43
   2 -46 -18   52.14    5.65
  -2  46 -18   49.39    5.42
   2 -46  20   -0.27    4.04
  -2  46  20    0.00    3.87
   2  46 -20    2.90    4.24
  -2 -46 -20   -6.60    3.98
   2  46  20   -2.49    3.56
  -2 -46  20    3.28    3.00
   2 -46 -20    1.14    3.52
  -2  46 -20   -0.77    4.16
   2 -46  22    7.14    4.52
  -2  46  22    1.99    3.50
   2  46 -22    8.78    4.29
  -2 -46 -22    7.30    3.85
   2  46  22    2.40    3.94
  -2 -46  22    8.14    3.04
   2 -46 -22    2.78    3.89
  -2  46 -22    3.32    3.92
   2 -46  24   29.09    4.29
  -2  46  24   37.74    4.33
   2  46 -24   31.33    4.91
  -2 -46 -24   30.98    4.88
   2  46  24   22.21    4.66
  -2 -46  24   23.44    4.24
   2 -46 -24   18.01    4.53
  -2  46 -24   29.05    3.86
   2 -46  26  136.30    9.70
  -2  46  26  117.80    8.54
   2  46 -26  126.40    9.08
  -2 -46 -26  113.80    8.37
   2  46  26  136.20    9.51
  -2 -46  26  121.50    9.14
   2 -46 -26  126.70    9.13
  -2  46 -26  122.00    9.00
   2 -46  28    5.64    4.18
  -2  46  28    3.87    3.52
   2  46 -28    7.94    3.32
  -2 -46 -28    3.07    3.75
   2  46  28    7.48    4.13
  -2 -46  28    2.45    3.03
   2 -46 -28    3.24    3.92
  -2  46 -28    6.51    3.91
   2 -46  30   98.66    7.46
  -2  46  30  106.80    7.99
   2  46 -30   92.32    7.39
  -2 -46 -30  113.50    8.44
   2  46  30  115.10    8.40
  -2 -46  30  114.50    8.34
   2 -46 -30   98.48    7.65
  -2  46 -30  106.50    7.90
   2 -46  32   -1.50    3.89
  -2  46  32   -0.99    3.10
   2  46 -32   -3.46    3.44
  -2 -46 -32    0.46    3.77
   2  46  32    4.64    3.86
  -2 -46  32   -0.11    3.52
   2 -46 -32    0.48    3.99
  -2  46 -32    0.22    3.25
   2 -46  34   21.97    4.57
  -2  46  34   35.84    4.53
   2  46 -34   37.21    4.95
  -2 -46 -34   35.49    4.97
   2  46  34   34.47    4.49
  -2 -46  34   41.14    4.89
   2 -46 -34   42.52    5.09
  -2  46 -34   38.32    4.81
   2  48   0   -4.90    3.67
  -2 -48   0   -1.66    3.04
   2 -48   0   -3.48    3.69
  -2  48   0   -1.99    4.02
   2 -48   2   65.86    6.28
  -2  48   2   63.59    6.00
   2  48  -2   61.87    5.76
  -2 -48  -2   49.11    5.53
   2  48   2   57.28    6.07
  -2 -48   2   51.51    5.98
   2 -48  -2   63.14    6.22
  -2  48  -2   52.77    5.43
   2 -48   4   39.22    5.22
  -2  48   4   29.49    4.49
   2  48  -4   39.72    5.33
  -2 -48  -4   33.00    3.94
   2  48   4   35.27    4.36
  -2 -48   4   32.30    4.14
   2 -48  -4   36.15    5.29
  -2  48  -4   39.62    5.34
   2 -48   6    4.07    3.10
  -2  48   6    1.05    2.85
   2  48  -6    3.53    3.99
  -2 -48  -6    1.63    2.91
   2  48   6    2.44    3.43
  -2 -48   6    7.86    4.29
   2 -48  -6    0.10    2.89
  -2  48  -6   -2.96    3.41
   2 -48   8    4.27    4.32
  -2  48   8    5.42    4.05
  -2 -48  -8    1.25    3.82
   2  48   8   -3.88    4.12
  -2 -48   8    3.75    2.97
   2 -48  -8    9.05    3.92
  -2  48  -8   -5.02    3.50
   2 -48  10    2.40    4.38
  -2  48  10    8.90    4.23
   2  48 -10    2.32    4.23
  -2 -48 -10   14.93    4.31
   2  48  10    5.87    4.15
  -2 -48  10    6.59    3.07
   2 -48 -10    5.75    4.13
  -2  48 -10    5.97    4.28
   2 -48  12   15.49    4.55
  -2  48  12   20.75    4.28
   2  48 -12   14.58    4.03
  -2 -48 -12   20.57    4.54
   2  48  12   23.54    4.56
  -2 -48  12   16.53    4.25
   2 -48 -12   21.45    4.61
  -2  48 -12   16.72    4.40
   2 -48  14   35.39    4.94
  -2  48  14   34.62    4.70
   2  48 -14   31.05    4.52
  -2 -48 -14   19.27    4.58
   2  48  14   29.02    4.93
  -2 -48  14   30.61    4.99
   2 -48 -14   25.79    4.63
  -2  48 -14   23.41    4.77
   2 -48  16    7.63    3.86
  -2  48  16   -1.18    3.25
   2  48 -16    7.23    3.28
  -2 -48 -16   -5.07    3.96
   2  48  16    3.87    4.14
  -2 -48  16   10.50    4.47
   2 -48 -16   -1.67    3.83
  -2  48 -16    5.55    4.00
   2 -48  18   -1.04    3.71
  -2  48  18   -7.22    3.45
   2  48 -18   -5.72    3.25
  -2 -48 -18    1.64    3.95
   2  48  18    1.01    3.98
  -2 -48  18    1.52    4.11
   2 -48 -18   -1.19    3.91
  -2  48 -18    0.59    4.21
   2 -48  20   21.01    4.40
  -2  48  20   24.90    4.36
   2  48 -20   21.30    3.56
  -2 -48 -20   19.97    3.99
   2  48  20   24.40    4.26
  -2 -48  20   23.79    4.58
   2 -48 -20   30.90    4.76
  -2  48 -20   31.32    4.79
   2 -48  22   15.30    4.18
  -2  48  22    9.83    3.94
   2  48 -22    9.74    3.45
  -2 -48 -22    8.70    3.95
   2  48  22    9.07    3.45
  -2 -48  22    8.84    3.87
   2 -48 -22   12.07    4.06
  -2  48 -22    9.69    3.88
   2 -48  24   99.06    7.31
  -2  48  24  103.50    7.73
   2  48 -24  104.10    7.75
  -2 -48 -24   94.87    7.40
   2  48  24   96.16    7.53
  -2 -48  24   89.20    6.68
   2 -48 -24  120.90    8.69
  -2  48 -24   95.38    7.21
   2 -48  26    9.98    3.64
  -2  48  26    7.50    3.43
   2  48 -26    6.50    3.94
  -2 -48 -26    5.69    3.33
   2  48  26    8.90    3.65
  -2 -48  26   11.12    2.98
   2 -48 -26   10.07    4.12
  -2  48 -26   10.00    4.40
   2 -48  28  101.70    7.91
  -2  48  28   98.29    7.53
   2  48 -28  108.90    8.07
  -2 -48 -28   96.91    7.41
   2  48  28   96.80    7.35
  -2 -48  28  109.40    8.29
  -2  48 -28   90.85    7.18
   2 -48  30   -0.63    2.90
  -2  48  30    2.07    2.66
   2  48 -30    1.39    3.45
  -2 -48 -30   -0.25    4.02
   2  48  30    4.13    3.24
  -2 -48  30   -1.04    2.91
   2 -48 -30    2.82    4.28
  -2  48 -30   -1.36    3.60
   2  50   0   43.39    5.36
  -2 -50   0   41.57    5.08
   2 -50   0   50.01    4.75
  -2  50   0   38.70    4.82
   2 -50   2  225.20   14.60
  -2  50   2  195.40   12.68
   2  50  -2  204.10   13.13
  -2 -50  -2  215.20   13.72
   2  50   2  208.90   13.34
  -2 -50   2  242.70   15.23
   2 -50  -2  209.10   13.65
  -2  50  -2  217.00   14.22
   2 -50   4   52.22    5.33
  -2  50   4   43.59    4.62
   2  50  -4   46.81    5.23
  -2 -50  -4   54.21    5.63
   2  50   4   45.12    4.42
  -2 -50   4   32.01    4.73
   2 -50  -4   54.04    5.34
  -2  50  -4   43.38    4.38
   2 -50   6  206.90   13.32
  -2  50   6  209.50   13.66
   2  50  -6  228.70   14.68
  -2 -50  -6  195.00   12.91
   2  50   6  218.90   14.16
  -2 -50   6  204.30   13.13
   2 -50  -6  210.20   13.58
  -2  50  -6  210.80   13.84
   2 -50   8   26.46    4.68
  -2  50   8   29.93    4.28
   2  50  -8   28.58    4.41
  -2 -50  -8   27.13    4.41
   2  50   8   24.37    4.38
  -2 -50   8   25.54    4.16
   2 -50  -8   21.04    4.56
  -2  50  -8   16.77    4.03
   2 -50  10  125.50    9.08
  -2  50  10   98.66    7.39
   2  50 -10  125.10    9.19
  -2 -50 -10  100.50    7.54
   2  50  10  111.30    8.35
  -2 -50  10   99.22    7.79
   2 -50 -10  105.40    7.97
  -2  50 -10  109.10    7.74
   2 -50  12    3.09    3.72
  -2  50  12   -3.29    2.82
   2  50 -12    0.45    3.20
  -2 -50 -12    1.01    3.57
   2  50  12    0.35    3.79
  -2 -50  12    4.86    3.74
   2 -50 -12   -0.07    3.25
  -2  50 -12    2.24    2.68
   2 -50  14  116.40    8.49
  -2  50  14  137.70    9.21
   2  50 -14  132.80    9.44
  -2 -50 -14  102.00    7.77
   2  50  14  125.20    8.96
  -2 -50  14  131.80    9.23
   2 -50 -14  141.40    9.72
  -2  50 -14  132.90    9.28
   2 -50  16    2.11    3.50
  -2  50  16    3.69    3.34
   2  50 -16   -2.67    3.75
  -2 -50 -16    0.40    3.74
   2  50  16    5.18    3.69
  -2 -50  16   -3.26    2.81
   2 -50 -16    0.28    3.40
  -2  50 -16    6.54    3.79
   2 -50  18   38.74    4.74
  -2  50  18   38.72    4.20
   2  50 -18   31.13    4.79
  -2 -50 -18   39.16    4.56
   2  50  18   48.02    5.34
  -2 -50  18   37.58    4.11
   2 -50 -18   29.71    4.28
  -2  50 -18   46.87    5.22
   2 -50  20   14.80    4.06
  -2  50  20    3.27    2.68
   2  50 -20    9.61    4.02
  -2 -50 -20   13.12    3.66
   2  50  20   11.69    3.77
  -2 -50  20    9.11    3.67
   2 -50 -20    1.35    3.37
  -2  50 -20   11.91    3.68
   2 -50  22   11.88    3.99
  -2  50  22   -1.01    2.89
   2  50 -22   -0.26    3.72
  -2 -50 -22    0.08    3.76
   2  50  22    0.68    3.06
  -2 -50  22   -5.68    3.71
   2 -50 -22    5.68    3.52
  -2  50 -22    1.18    2.60
   2 -50  24    9.44    3.62
  -2  50  24    6.16    3.74
   2  50 -24    9.96    3.99
  -2 -50 -24   10.04    3.54
   2  50  24    7.40    3.76
  -2 -50  24    9.58    3.99
   2 -50 -24    5.52    3.98
  -2  50 -24    5.53    3.17
   2  52   0    6.22    3.67
  -2 -52   0   -0.60    2.98
   2 -52   0    1.20    2.78
  -2  52   0    5.98    3.76
   2 -52   2   18.49    4.27
  -2  52   2   18.39    3.20
   2  52  -2   17.27    3.27
  -2 -52  -2   25.86    4.66
   2  52   2   13.93    4.02
  -2 -52   2   18.57    4.57
   2 -52  -2   16.33    4.31
  -2  52  -2   10.09    3.88
   2 -52   4    0.71    3.31
  -2  52   4   -0.30    3.75
   2  52  -4    2.26    3.63
  -2 -52  -4    2.13    3.70
   2  52   4    3.55    3.35
  -2 -52   4    6.70    3.13
   2 -52  -4    1.39    3.17
  -2  52  -4    7.95    3.85
   2 -52   6    1.44    3.00
  -2  52   6    1.01    2.93
   2  52  -6    1.58    2.79
  -2 -52  -6   -0.86    3.09
   2  52   6   -2.41    3.43
  -2 -52   6   -9.58    3.96
   2 -52  -6    3.14    3.78
  -2  52  -6    4.94    2.91
   2 -52   8   60.05    5.54
  -2  52   8   58.27    5.01
   2  52  -8   52.77    5.31
  -2 -52  -8   51.85    5.66
   2  52   8   49.25    5.26
  -2 -52   8   38.99    5.14
   2 -52  -8   53.94    5.46
  -2  52  -8   46.67    5.16
   2 -52  10   10.61    3.81
  -2  52  10   14.52    3.74
   2  52 -10   13.77    3.88
  -2 -52 -10   11.58    4.10
   2  52  10   10.88    3.79
  -2 -52  10   10.65    3.22
   2 -52 -10   14.24    3.52
  -2  52 -10   19.73    4.12
   2 -52  12    2.54    3.42
  -2  52  12    1.73    3.49
   2  52 -12    0.88    3.34
  -2 -52 -12    6.84    3.80
   2  52  12    9.08    3.65
  -2 -52  12    3.70    2.81
   2 -52 -12    4.00    3.32
  -2  52 -12    6.61    3.67
   2 -52  14   12.62    3.55
  -2  52  14   12.71    3.98
   2  52 -14   13.02    3.76
  -2 -52 -14    4.01    3.54
   2  52  14    8.15    3.76
  -2 -52  14   10.29    3.55
   2 -52 -14   16.38    3.81
  -2  52 -14   12.95    3.23
   2 -52  16    0.55    3.11
  -2  52  16   -0.13    3.87
   2  52 -16    8.07    3.92
  -2 -52 -16    1.87    3.49
   2  52  16    4.18    3.61
  -2 -52  16   -2.67    3.36
   2 -52 -16   -2.05    3.51
  -2  52 -16   -2.34    2.53
   2 -52  18    2.47    3.35
  -2  52  18    2.03    3.75
   2  52 -18   -0.40    3.58
  -2 -52 -18    1.04    3.48
   2  52  18   -0.77    3.64
  -2 -52  18    6.40    3.43
   2 -52 -18    4.24    3.61
  -2  52 -18    4.10    2.87
   2  54   0    7.58    3.54
  -2 -54   0   15.25    4.33
   2 -54   0    3.72    3.08
  -2  54   0   10.95    3.30
   2 -54   2   80.85    7.10
  -2  54   2  102.10    7.52
   2  54  -2   87.93    6.17
  -2 -54  -2   75.80    6.16
   2  54   2   82.08    6.49
   2 -54  -2   71.08    6.44
  -2  54  -2   69.59    5.89
   2 -54   4   -2.96    3.87
  -2  54   4    3.11    2.44
   2  54  -4    5.37    3.55
   2  54   4    0.27    3.09
   2 -54  -4    1.54    3.23
  -2  54  -4    2.48    2.82
  -2  54   6   42.01    4.84
   2  54   6   33.30    4.54
  -2  54  -6   37.07    4.63
   3  -1   1   63.79    6.53
  -3   1   1   82.70    7.25
   3   1  -1   80.40    7.44
   3   1   1   79.74    7.05
  -3  -1   1   90.28    7.58
   3  -1  -1   73.75    6.69
  -3   1  -1   73.23    6.91
  -3   1   3  248.70   16.11
   3   1  -3  244.50   15.82
  -3  -1  -3  255.70   16.14
   3   1   3  289.10   18.21
  -3  -1   3  299.30   18.77
   3  -1  -3  256.00   16.60
  -3   1  -3  246.90   15.73
   3  -1   5   -0.69    3.86
  -3   1   5    1.51    4.45
   3   1  -5    4.66    4.65
  -3  -1  -5    4.24    4.18
   3   1   5    3.81    3.83
  -3  -1   5    8.18    5.47
   3  -1  -5    5.27    4.75
  -3   1  -5    4.12    4.08
   3  -1   7  247.20   15.58
  -3   1   7  241.30   15.67
   3   1  -7  236.90   15.49
  -3  -1  -7  218.50   13.80
   3   1   7  234.30   14.78
   3  -1  -7  211.00   14.02
  -3   1  -7  240.00   15.08
   3  -1   9  107.40    7.81
  -3   1   9   98.22    8.21
   3   1  -9   90.67    7.73
  -3  -1  -9   97.53    6.99
   3   1   9  104.10    7.52
  -3  -1   9  104.50    8.39
   3  -1  -9   91.36    7.71
  -3   1  -9   90.44    6.74
   3  -1  11  159.90   10.42
  -3   1  11  168.40   11.22
   3   1 -11  162.80   11.31
  -3  -1 -11  140.80    9.16
   3   1  11  144.30    9.47
  -3  -1  11  152.00   10.59
   3  -1 -11  151.60   10.60
  -3   1 -11  164.00   10.56
   3  -1  13   82.48    5.86
  -3   1  13   82.08    6.96
   3   1 -13   73.88    6.64
  -3  -1 -13   81.97    5.83
   3   1  13   75.12    5.47
  -3  -1  13   92.33    7.47
  -3   1 -13   95.32    6.68
   3  -1  15  704.80   41.29
  -3   1  15  743.10   43.98
   3   1 -15  764.60   45.26
  -3  -1 -15  722.30   42.28
   3   1  15  734.80   43.01
  -3  -1  15  755.20   44.64
   3  -1 -15  752.20   44.53
  -3   1 -15  727.80   42.60
   3  -1  17  300.10   17.89
  -3   1  17  288.00   17.71
   3   1 -17  282.20   17.61
  -3  -1 -17  294.30   17.53
  -3  -1  17  262.50   16.26
   3  -1 -17  296.30   18.29
  -3   1 -17  284.20   16.97
   3  -1  19 1652.00   95.98
  -3   1  19 1687.00   98.35
   3   1 -19 1637.00   95.55
  -3  -1 -19 1718.00   99.77
  -3  -1 -19 1687.00   98.03
  -3  -1  19 1548.00   90.30
   3  -1 -19 1608.00   93.84
  -3   1 -19 1732.00  100.50
   3  -1  21  548.80   32.12
  -3   1  21  463.50   27.90
   3   1 -21  476.00   28.57
  -3  -1 -21  549.20   32.14
  -3  -1 -21  542.60   31.75
  -3  -1  21  547.70   32.75
   3  -1 -21  532.20   31.86
  -3   1 -21  519.90   30.44
   3   1 -23  570.70   33.99
  -3  -1 -23  593.80   34.72
  -3  -1 -23  592.90   34.68
  -3  -1  23  597.30   35.61
   3  -1 -23  506.50   30.35
  -3   1 -23  555.40   32.50
  -3   1 -23  560.50   32.77
  -3   1  25   -2.14    3.07
   3   1 -25   -3.53    3.57
  -3  -1  25   -1.16    2.89
   3  -1 -25   -5.92    2.99
  -3   1 -25    1.88    0.95
  -3   1 -25    1.52    0.95
  -3   1  27 1644.00   95.96
   3   1 -27 1908.00  111.40
  -3  -1  27 1634.00   95.35
   3  -1 -27 1645.00   96.04
  -3  -1  29  224.90   14.48
   3  -1 -29  210.80   13.41
  -3   1  31 1199.00   70.25
  -3  -1  31  880.90   52.00
   3  -1 -31  853.90   50.25
  -3   1  33   75.29    5.62
  -3  -1  33   83.10    6.08
  -3  -1  33   84.93    6.54
   3  -1 -33   78.10    6.22
  -3   1  37   26.88    3.75
  -3   1  37   27.14    3.51
  -3  -1  37   24.54    3.64
  -3  -1  37   29.17    3.60
  -3   1  39  417.80   25.16
  -3   1  39  445.00   26.90
  -3  -1  39  429.90   25.91
  -3  -1  39  440.40   26.62
  -3   1  41   39.38    4.01
  -3   1  41   39.66    4.09
  -3  -1  41   48.33    4.27
  -3  -1  41   39.64    4.15
  -3   1  43    1.68    2.68
  -3   1  43    2.70    2.44
  -3  -1  43    2.47    3.00
  -3  -1  43    6.66    2.44
  -3   1  45   16.24    3.04
  -3   1  45   16.60    3.08
  -3  -1  45   18.46    3.17
  -3  -1  45   15.52    3.18
  -3   1  47   43.49    4.08
  -3   1  47   52.68    4.69
  -3  -1  47   52.69    4.72
  -3  -1  47   60.53    4.77
  -3   1  49   12.52    3.29
  -3   1  49   14.07    2.92
  -3  -1  49    5.04    2.89
  -3  -1  49    9.64    2.99
  -3   1  51   37.45    3.91
  -3   1  51   43.49    3.97
  -3  -1  51   45.06    4.22
  -3  -1  51   40.99    3.94
  -3   1  53   12.81    2.83
  -3   1  53   16.44    3.10
  -3   1  55   22.44    3.15
  -3   1  55   18.33    2.97
  -3  -1  55   15.92    2.92
  -3  -1  55   24.05    3.19
  -3   1  57   28.89    3.14
  -3   1  57   25.90    2.95
  -3  -1  57   29.67    3.27
  -3  -1  57   25.88    3.16
  -3   1  59    0.27    1.38
  -3   1  59    0.16    1.60
  -3  -1  59   -0.45    1.76
  -3  -1  59    0.66    1.69
   3  -3   1    8.72    4.37
  -3   3   1   -3.23    4.87
   3   3  -1    5.23    4.82
  -3  -3  -1    3.06    4.28
   3   3   1    6.70    4.12
  -3  -3   1    2.96    3.65
   3  -3  -1    7.84    4.17
  -3   3  -1   -1.71    4.79
   3  -3   3   58.53    6.11
  -3   3   3   51.09    6.39
   3   3  -3   51.44    5.84
  -3  -3  -3   53.35    5.48
   3   3   3   56.32    6.01
  -3  -3   3   68.04    7.24
   3  -3  -3   60.39    6.40
  -3   3  -3   65.11    6.18
   3  -3   5    3.23    3.99
  -3   3   5   -1.87    3.53
   3   3  -5    0.93    3.56
  -3  -3  -5   -2.55    4.33
   3   3   5    3.75    3.72
  -3  -3   5   -1.00    4.42
   3  -3  -5    0.47    3.93
  -3   3  -5    0.90    3.53
   3  -3   7  434.90   26.19
  -3   3   7  447.10   27.27
   3   3  -7  427.20   26.08
  -3  -3  -7  442.70   26.65
   3   3   7  362.40   22.01
  -3  -3   7  433.20   26.57
   3  -3  -7  423.10   25.79
  -3   3  -7  393.90   23.82
   3  -3   9   83.97    6.58
  -3   3   9   90.46    7.66
   3   3  -9   88.43    7.52
  -3  -3  -9   78.41    5.99
  -3  -3   9   92.83    7.71
   3  -3  -9   85.67    7.35
  -3   3  -9   82.85    6.35
   3  -3  11    7.18    2.92
  -3   3  11    3.08    3.63
   3   3 -11    3.72    4.01
  -3  -3 -11    1.25    2.58
  -3  -3 -11    2.43    2.85
  -3  -3  11    3.69    4.15
   3  -3 -11    3.84    4.05
  -3   3 -11    5.38    3.06
   3  -3  13   18.61    3.12
  -3   3  13   31.28    4.64
   3   3 -13   22.39    4.02
  -3  -3 -13   21.36    3.34
  -3  -3 -13   26.83    3.62
  -3  -3  13   21.74    4.29
   3  -3 -13   27.59    4.74
  -3   3 -13   17.90    3.16
   3  -3  15  437.20   25.93
  -3   3  15  440.20   26.49
   3   3 -15  428.00   25.89
  -3  -3 -15  476.60   28.27
  -3  -3 -15  426.20   25.27
  -3  -3  15  487.60   29.29
  -3   3 -15  406.10   24.11
   3  -3  17    7.40    2.20
  -3   3  17    3.64    3.29
   3   3 -17    7.24    4.18
  -3  -3 -17    4.97    2.26
  -3  -3 -17    4.91    2.22
  -3  -3  17    6.46    3.58
   3  -3 -17    5.49    3.80
  -3   3 -17    7.37    2.33
   3  -3  19  296.70   17.74
  -3   3  19  307.80   18.95
   3   3 -19  300.60   18.74
  -3  -3 -19  284.00   16.92
  -3  -3 -19  271.40   16.22
  -3  -3  19  258.70   16.13
   3  -3 -19  251.50   15.87
  -3   3 -19  283.30   16.91
   3  -3  21  932.10   54.31
  -3  -3 -21  987.10   57.49
  -3  -3 -21 1020.00   59.38
   3  -3 -21 1023.00   60.04
  -3   3 -21  938.70   54.69
   3  -3  23   29.12    2.54
  -3   3  23   32.55    4.25
  -3  -3 -23   28.88    2.41
  -3  -3 -23   30.41    2.42
  -3  -3  23   29.92    4.21
  -3  -3  23   33.26    4.21
   3  -3 -23   32.69    4.11
  -3   3 -23   30.30    2.50
   3  -3  25  717.90   41.93
  -3   3  25  779.80   45.99
  -3  -3 -25  623.20   36.70
  -3  -3 -25  653.60   38.44
  -3  -3  25  674.80   39.96
  -3  -3  25  698.70   41.34
  -3   3 -25  603.30   35.28
  -3   3  27  335.60   20.49
  -3  -3  27  377.60   22.91
  -3  -3  27  376.80   22.85
   3  -3 -27  387.00   23.55
  -3   3 -27  412.40   24.44
  -3   3 -27  370.50   21.94
  -3   3  29   88.26    6.76
  -3  -3  29   89.67    6.88
  -3  -3  29   85.48    6.76
   3  -3 -29   77.23    6.04
  -3   3  31  698.00   41.34
  -3  -3  31  699.90   41.60
  -3  -3  31  747.70   44.26
   3  -3 -31  717.10   42.37
  -3   3  33   84.50    6.21
  -3  -3  33   83.73    6.48
  -3  -3  33   80.33    6.03
   3  -3 -33   77.33    5.92
  -3   3  35    0.40    2.57
  -3  -3  35   -0.82    2.91
  -3  -3  35    0.41    2.59
   3  -3 -35   -0.53    2.85
  -3   3  37    2.20    2.99
  -3  -3  37   -2.23    2.73
  -3  -3  37   -1.88    2.93
   3  -3 -37    4.09    3.05
  -3   3  39  800.90   47.32
  -3  -3  39  855.60   50.57
  -3  -3  39  819.80   48.36
  -3   3  41  185.10   11.73
  -3   3  41  190.90   11.98
  -3  -3  41  157.00   10.15
  -3  -3  41  185.20   11.93
  -3   3  43  343.30   20.97
  -3   3  43  289.30   17.62
  -3  -3  43  360.20   21.71
  -3  -3  43  329.90   20.17
  -3   3  45   16.53    3.10
  -3   3  45   22.96    3.32
  -3  -3  45   18.66    3.35
  -3  -3  45   28.77    3.78
  -3   3  47    8.11    2.71
  -3   3  47   11.78    2.67
  -3  -3  47    1.38    2.76
  -3  -3  47   10.71    2.65
  -3   3  49   38.06    4.08
  -3   3  49   39.93    4.19
  -3  -3  49   41.70    3.93
  -3  -3  49   36.74    4.02
  -3  -3  51  692.00   40.87
  -3  -3  51  654.80   38.64
  -3   3  53   51.87    4.36
  -3   3  53   57.56    4.95
  -3  -3  53   54.67    4.72
  -3  -3  53   40.82    4.07
  -3   3  55  205.60   12.70
  -3   3  55  212.90   13.11
  -3  -3  55  202.70   12.65
  -3  -3  55  217.60   13.51
  -3   3  57  175.60   10.94
  -3   3  57  168.60   10.48
  -3  -3  57  154.60    9.89
  -3  -3  57  159.20   10.07
  -3  -3  59    6.83    2.31
  -3  -3  59    5.70    2.38
   3  -5   1 1152.00   67.65
  -3   5   1 1151.00   67.63
  -3  -5  -1 1016.00   59.86
  -3  -5  -1 1018.00   59.92
  -3  -5   1 1038.00   61.15
  -3  -5   1  953.20   56.23
   3  -5  -1 1094.00   64.34
  -3   5  -1  944.60   55.71
   3  -5   3  694.90   41.30
  -3   5   3  692.70   41.21
  -3  -5  -3  664.20   39.53
  -3  -5  -3  676.50   40.19
  -3  -5   3  672.60   40.23
  -3  -5   3  713.60   42.51
   3  -5  -3  705.70   41.93
  -3   5  -3  679.50   40.37
   3  -5   5  355.10   21.83
  -3   5   5  348.00   21.68
  -3  -5  -5  338.20   20.82
  -3  -5  -5  348.90   21.40
  -3  -5   5  348.00   21.76
  -3  -5   5  339.20   21.29
   3  -5  -5  337.60   21.15
  -3   5  -5  338.50   20.88
   3  -5   7  269.10   16.73
  -3  -5  -7  234.70   14.90
  -3  -5  -7  278.50   17.32
  -3  -5   7  256.30   16.56
  -3  -5   7  277.80   17.78
   3  -5  -7  307.70   19.33
  -3   5  -7  284.70   17.67
   3  -5   9   32.56    4.49
  -3   5   9   16.03    4.72
  -3  -5  -9   29.52    3.96
  -3  -5  -9   21.23    3.78
  -3  -5   9   36.63    5.55
  -3  -5   9   15.83    4.65
   3  -5  -9   21.70    4.87
  -3   5  -9   25.51    4.06
   3  -5  11 1237.00   72.26
  -3  -5 -11 1248.00   72.83
  -3  -5 -11 1262.00   73.72
  -3  -5  11 1261.00   73.93
  -3  -5  11 1276.00   74.81
   3  -5 -11 1303.00   76.30
  -3   5 -11 1231.00   71.90
   3  -5  13  819.50   48.08
  -3  -5 -13  833.10   48.84
  -3  -5 -13  843.70   49.43
  -3  -5  13  844.50   49.95
  -3  -5  13  818.60   48.37
   3  -5 -13  849.30   50.08
  -3   5 -13  809.70   47.50
   3  -5  15  185.60   11.62
  -3   5  15  208.90   13.37
  -3  -5 -15  193.70   11.99
  -3  -5 -15  186.60   11.65
  -3  -5  15  195.50   12.77
  -3  -5  15  195.50   12.75
   3  -5 -15  199.00   12.95
  -3   5 -15  187.00   11.68
   3  -5  17   11.12    2.63
  -3   5  17    3.74    3.32
  -3  -5 -17    8.59    2.34
  -3  -5 -17   11.03    2.39
  -3  -5  17    6.57    3.65
  -3  -5  17    4.00    3.83
   3  -5 -17    9.07    3.80
  -3   5 -17    7.34    2.43
   3  -5  19  641.60   37.66
  -3   5  19  648.10   38.50
  -3  -5 -19  632.40   37.06
  -3  -5 -19  594.00   34.86
  -3  -5  19  645.90   38.38
  -3  -5  19  635.90   37.85
   3  -5 -19  664.60   39.44
  -3   5 -19  627.10   36.81
   3  -5  21  610.20   35.74
  -3   5  21  612.20   36.50
  -3  -5 -21  604.50   35.42
  -3  -5 -21  621.70   36.40
  -3  -5  21  646.60   38.51
  -3  -5  21  643.40   38.35
  -3   5 -21  592.80   34.79
   3  -5  23  926.40   54.03
  -3   5  23  921.90   54.30
  -3  -5 -23  985.80   57.43
  -3  -5 -23  923.70   53.82
  -3  -5  23  845.60   49.92
  -3  -5  23  960.70   56.56
   3  -5 -23 1012.00   59.54
  -3   5 -23 1003.00   58.49
   3  -5  25 1481.00   86.17
  -3   5  25 1457.00   85.06
  -3  -5 -25 1474.00   85.77
  -3  -5 -25 1641.00   95.51
  -3  -5  25 1450.00   84.72
  -3  -5  25 1628.00   95.08
   3  -5 -25 1734.00  101.20
  -3   5 -25 1731.00  100.60
   3  -5  27  182.80   11.02
  -3   5  27  141.80    9.61
  -3  -5 -27  143.40    8.62
  -3  -5 -27  158.20    9.49
  -3  -5  27  145.70    9.75
   3  -5 -27  152.50   10.23
  -3   5 -27  136.10    8.31
   3  -5  29  113.40    6.85
  -3   5  29  109.90    8.02
  -3  -5  29  112.90    8.14
  -3  -5  29  104.40    7.73
   3  -5 -29  106.50    7.57
  -3   5 -29  108.10    6.64
  -3   5  31   46.64    4.57
  -3  -5  31   51.41    5.15
  -3  -5  31   36.54    4.20
   3  -5 -31   40.67    4.13
  -3   5  33  363.70   21.99
  -3  -5  33  348.70   21.34
  -3  -5  33  327.80   19.90
   3  -5 -33  366.10   22.21
  -3   5  35  322.60   19.62
  -3  -5  35  421.10   25.42
  -3  -5  35  397.80   23.99
   3  -5 -35  407.60   24.60
  -3   5  37   21.83    3.66
  -3  -5  37   16.87    3.58
  -3  -5  37   12.91    3.32
   3  -5 -37   11.82    2.99
  -3   5  39    2.25    2.57
  -3  -5  39   -0.14    3.00
  -3  -5  39    3.09    2.81
   3  -5 -39   -2.71    2.60
  -3   5  41  121.30    8.12
  -3  -5  41   98.07    7.11
   3  -5 -41  101.60    7.24
  -3   5  43   19.58    3.11
  -3   5  43   22.78    3.38
  -3  -5  43   23.85    3.41
  -3  -5  43   27.46    3.73
  -3   5  45   31.98    3.73
  -3   5  45   32.99    3.85
  -3  -5  45   26.04    3.61
  -3  -5  45   37.46    4.38
  -3   5  47    9.77    2.72
  -3   5  47    7.64    2.83
  -3  -5  47   10.73    2.90
  -3  -5  47   11.37    2.71
  -3   5  49   32.71    3.68
  -3   5  49   28.68    3.57
  -3  -5  49   32.90    3.67
  -3  -5  49   26.99    3.51
  -3   5  51  157.20   10.21
  -3   5  51  133.70    8.82
  -3  -5  51  136.80    9.09
  -3  -5  51  156.70   10.11
  -3   5  53   34.16    3.48
  -3   5  53   39.87    4.03
  -3  -5  53   34.80    3.71
  -3  -5  53   44.86    4.13
  -3   5  55   35.18    3.50
  -3   5  55   40.21    3.84
  -3  -5  55   33.52    3.77
  -3  -5  55   36.19    3.81
  -3   5  57    0.66    2.32
  -3   5  57    1.24    2.21
  -3  -5  57   -3.75    2.51
  -3  -5  57    3.45    2.75
  -3   5  59    2.14    1.70
  -3   5  59   -0.56    1.54
  -3  -5  59   -0.10    2.40
  -3  -5  59   -0.03    2.58
   3  -7   1   -3.12    3.98
  -3   7   1   -2.63    3.93
  -3  -7  -1   -2.91    4.01
  -3  -7  -1    0.28    4.31
  -3  -7   1   -2.94    4.08
  -3  -7   1   -4.00    4.30
   3  -7  -1   -1.44    4.50
  -3   7  -1    6.60    4.62
   3  -7   3    6.32    3.80
  -3   7   3   -1.63    4.60
  -3  -7  -3    1.19    4.45
  -3  -7  -3    3.10    4.11
  -3  -7   3    0.66    4.64
  -3  -7   3   -0.65    4.45
   3  -7  -3    0.18    4.98
  -3   7  -3    2.73    3.81
   3  -7   5   44.31    5.32
  -3   7   5   47.77    5.98
  -3  -7  -5   38.35    5.05
  -3  -7   5   35.67    5.65
  -3  -7   5   40.33    5.71
   3  -7  -5   41.49    4.95
  -3   7  -5   39.21    5.10
   3  -7   7   65.50    5.86
  -3   7   7   76.41    7.09
  -3  -7  -7   66.72    6.09
  -3  -7   7   58.35    6.17
   3  -7  -7   63.41    6.59
  -3   7  -7   72.81    6.23
   3  -7   9    1.71    3.44
  -3   7   9    3.24    4.31
  -3  -7  -9    3.34    3.42
  -3  -7  -9    4.35    3.50
  -3  -7   9   -0.32    4.34
  -3  -7   9    6.60    4.40
   3  -7  -9    5.66    4.13
  -3   7  -9    4.24    3.51
   3  -7  11  277.70   17.11
  -3   7  11  274.20   17.32
  -3  -7 -11  240.80   15.00
  -3  -7 -11  250.20   15.46
  -3  -7  11  310.90   19.32
   3  -7 -11  318.20   19.68
  -3   7 -11  264.40   16.30
   3  -7  13  103.90    7.35
  -3   7  13   99.86    7.80
  -3  -7 -13   97.84    6.88
  -3  -7 -13  113.10    7.72
  -3  -7  13  112.60    8.55
  -3  -7  13  108.40    8.38
   3  -7 -13   88.47    6.93
  -3   7 -13  116.70    7.95
   3  -7  15   43.13    4.20
  -3   7  15   45.33    5.03
  -3  -7 -15   45.30    4.10
  -3  -7 -15   47.69    4.34
  -3  -7  15   50.38    5.14
  -3  -7  15   43.49    5.17
   3  -7 -15   39.23    4.95
  -3   7 -15   40.23    4.25
   3  -7  17  603.70   35.65
  -3   7  17  587.50   34.94
  -3  -7 -17  558.30   32.95
  -3  -7 -17  648.90   38.17
  -3  -7  17  620.70   36.97
  -3  -7  17  603.80   36.00
   3  -7 -17  632.90   37.61
  -3   7 -17  620.90   36.54
   3  -7  19    5.26    2.58
  -3   7  19    9.89    3.72
  -3  -7 -19    8.07    2.42
  -3  -7 -19    5.46    2.44
  -3  -7  19    5.41    3.63
  -3  -7  19   11.29    3.86
   3  -7 -19   10.76    3.59
  -3   7 -19    7.85    2.64
   3  -7  21  244.50   14.83
  -3   7  21  242.20   15.39
  -3  -7 -21  288.20   17.28
  -3  -7  21  247.10   15.67
  -3  -7  21  235.90   15.16
   3  -7 -21  276.00   17.23
  -3   7 -21  248.70   15.10
   3  -7  23  146.80    9.14
  -3   7  23  153.60   10.42
  -3  -7 -23  154.70    9.58
  -3  -7 -23  145.60    9.09
  -3  -7  23  162.80   10.90
   3  -7 -23  142.50    9.74
  -3   7 -23  148.30    9.40
   3  -7  25   38.95    3.31
  -3   7  25   41.87    4.27
  -3  -7 -25   38.67    3.28
  -3  -7 -25   38.53    3.06
  -3  -7  25   41.31    4.27
  -3  -7  25   34.02    4.38
   3  -7 -25   35.66    4.26
  -3   7 -25   42.34    3.44
   3  -7  27    3.51    1.97
  -3   7  27    4.26    3.07
  -3  -7 -27    3.64    1.33
  -3  -7 -27    7.25    1.61
  -3  -7  27    4.13    3.06
  -3  -7  27    5.92    3.11
   3  -7 -27    6.85    3.68
  -3   7 -27    4.67    1.87
   3  -7  29  697.20   40.75
  -3   7  29  631.50   37.59
  -3  -7 -29  669.50   39.26
  -3  -7 -29  721.00   42.26
  -3  -7  29  691.40   41.00
  -3  -7  29  692.30   41.11
   3  -7 -29  713.70   42.30
  -3   7 -29  666.60   39.02
   3  -7  31  104.30    6.48
  -3   7  31   95.48    6.90
  -3  -7  31  104.80    7.69
  -3  -7  31  100.70    7.42
   3  -7 -31  106.20    7.62
  -3   7 -31   82.70    5.31
   3  -7  33    1.11    0.96
  -3   7  33    1.87    2.35
  -3  -7  33   -1.40    3.41
  -3  -7  33    5.72    3.34
   3  -7 -33   -1.75    2.89
  -3   7 -33    0.33    1.05
  -3   7  35   15.95    3.38
  -3  -7  35   21.07    3.75
  -3  -7  35   16.96    3.34
   3  -7 -35   13.22    3.16
  -3   7  37  148.10   10.09
  -3  -7  37  158.10   10.56
  -3  -7  37  155.90   10.58
   3  -7 -37  152.70   10.15
  -3   7  39  228.60   14.46
  -3  -7  39  221.80   14.16
  -3  -7  39  220.70   14.14
   3  -7 -39  226.00   14.32
  -3   7  41  127.70    8.44
  -3  -7  41  143.70    9.76
  -3  -7  41  134.20    8.93
   3  -7 -41  138.40    9.23
  -3   7  43  200.60   12.67
  -3  -7  43  185.10   11.87
  -3  -7  43  209.00   13.19
   3  -7 -43  194.40   12.37
  -3   7  45   19.28    3.16
  -3  -7  45   11.50    3.20
  -3  -7  45   12.30    3.34
   3  -7 -45   13.85    3.15
  -3   7  47   23.50    3.49
  -3   7  47   19.71    3.52
  -3  -7  47   19.04    3.13
  -3  -7  47   23.52    3.42
  -3  -7  49   17.60    3.17
  -3  -7  49   27.68    3.40
  -3   7  51  158.60   10.28
  -3   7  51  165.60   10.50
  -3   7  53   40.46    3.99
  -3   7  53   41.35    4.15
  -3  -7  53   47.08    4.49
  -3  -7  53   33.32    3.73
  -3   7  55   48.80    4.31
  -3   7  55   47.61    4.36
  -3  -7  55   48.98    4.48
  -3  -7  55   50.43    4.59
  -3   7  57   18.55    2.77
  -3   7  57   21.37    3.13
  -3  -7  57   15.94    3.08
  -3  -7  57    8.03    2.81
  -3   7  59    1.06    2.05
  -3   7  59   -0.74    1.79
  -3  -7  59   -3.48    3.06
  -3  -7  59   -0.83    2.78
  -3  -7  61   30.32    2.67
  -3  -7  61   33.97    2.76
   3  -9   1 1371.00   80.31
  -3   9   1 1328.00   77.89
   3   9  -1 1278.00   75.07
  -3  -9  -1 1401.00   82.04
   3   9   1 1315.00   77.05
  -3  -9   1 1330.00   78.06
   3  -9  -1 1291.00   75.78
  -3   9  -1 1322.00   77.48
   3  -9   3 1779.00  103.80
  -3   9   3 1502.00   87.90
   3   9  -3 1763.00  103.00
  -3  -9  -3 1607.00   93.86
   3   9   3 1699.00   99.23
  -3  -9   3 1888.00  110.20
   3  -9  -3 1779.00  103.90
  -3   9  -3 1823.00  106.30
   3  -9   5  162.70   11.05
  -3   9   5  167.70   11.55
   3   9  -5  156.10   10.96
  -3  -9  -5  157.00   10.55
   3   9   5  169.30   11.38
  -3  -9   5  157.00   10.86
   3  -9  -5  171.10   11.75
  -3   9  -5  161.70   11.08
   3  -9   7  352.50   21.62
  -3   9   7  339.70   21.08
   3   9  -7  360.00   22.13
  -3  -9  -7  340.40   20.84
   3   9   7  348.60   21.43
  -3  -9   7  352.80   21.95
   3  -9  -7  363.70   22.52
  -3   9  -7  370.30   22.60
   3  -9   9  370.50   22.58
  -3   9   9  358.80   22.13
  -3  -9  -9  412.70   24.89
   3   9   9  337.80   20.70
  -3  -9   9  335.30   20.90
   3  -9  -9  370.00   22.87
  -3   9  -9  355.60   21.66
   3  -9  11 1846.00  107.60
  -3   9  11 1761.00  102.90
  -3  -9 -11 1748.00  101.90
   3   9  11 1751.00  102.00
  -3  -9  11 1745.00  101.90
  -3  -9  11 1518.00   88.82
  -3   9 -11 1823.00  106.20
   3  -9  13  510.50   30.54
  -3   9  13  541.80   32.58
  -3  -9 -13  505.40   30.08
   3   9  13  467.30   27.92
  -3  -9  13  512.50   30.94
  -3  -9  13  506.70   30.65
   3  -9 -13  452.80   27.39
  -3   9 -13  493.90   29.48
   3  -9  15   37.45    3.97
  -3   9  15   39.43    4.73
  -3  -9 -15   30.39    3.70
   3   9  15   36.45    4.01
  -3  -9  15   41.42    5.25
  -3  -9  15   40.84    5.07
   3  -9 -15   39.03    4.97
  -3   9 -15   40.81    4.03
   3  -9  17   14.46    3.17
  -3   9  17    5.04    3.63
  -3  -9 -17   18.63    3.16
   3   9  17   13.31    3.13
  -3  -9  17   16.41    3.99
  -3  -9  17   10.35    3.42
   3  -9 -17   19.43    3.98
  -3   9 -17   14.12    2.99
   3  -9  19   15.20    3.12
  -3   9  19   15.83    3.67
  -3  -9 -19   14.27    2.89
   3   9  19   10.99    2.40
  -3  -9  19    8.52    3.88
  -3  -9  19   11.47    3.76
   3  -9 -19    9.64    4.00
  -3   9 -19   14.29    2.80
   3  -9  21  770.40   45.23
  -3   9  21  797.30   47.19
  -3  -9 -21  892.50   52.20
  -3  -9  21  821.90   48.67
  -3  -9  21  732.60   43.47
   3  -9 -21  801.30   47.38
  -3   9 -21  775.00   45.49
   3  -9  23  354.80   21.21
  -3   9  23  404.70   24.36
  -3  -9 -23  393.60   23.47
  -3  -9 -23  319.10   19.15
  -3  -9  23  378.80   23.19
  -3  -9  23  358.50   21.79
   3  -9 -23  387.30   23.61
  -3   9 -23  346.90   20.85
   3  -9  25  571.40   33.69
  -3  -9 -25  603.50   35.44
  -3  -9 -25  583.60   34.28
  -3  -9  25  572.20   34.23
  -3  -9  25  600.90   35.66
   3  -9 -25  585.70   34.98
  -3   9 -25  545.40   32.17
   3  -9  27  196.60   12.13
  -3   9  27  190.20   12.43
  -3  -9 -27  181.80   11.12
  -3  -9  27  173.80   11.51
  -3  -9  27  154.30   10.29
   3  -9 -27  186.00   12.08
  -3   9 -27  186.60   11.54
   3  -9  29  155.10    9.65
  -3   9  29  191.60   12.55
  -3  -9 -29  181.20   11.00
  -3  -9 -29  170.70   10.40
  -3  -9  29  167.20   11.10
  -3  -9  29  183.80   12.32
   3  -9 -29  162.90   10.82
  -3   9 -29  186.00   11.44
   3  -9  31  154.60    9.52
  -3   9  31  165.60   10.88
  -3  -9 -31  158.50    9.62
  -3  -9 -31  163.60    9.84
  -3  -9  31  140.10    9.63
  -3  -9  31  141.40    9.62
  -3   9 -31  153.10    9.53
   3  -9  33  258.60   15.45
  -3   9  33  259.10   16.07
  -3  -9  33  227.90   14.39
  -3  -9  33  250.80   15.80
   3  -9 -33  269.10   16.83
  -3   9 -33  255.30   15.30
   3  -9  35  182.30   10.97
  -3   9  35  202.20   12.96
  -3  -9  35  186.00   12.11
  -3  -9  35  204.20   13.26
   3  -9 -35  194.00   12.45
  -3   9 -35  185.90   11.19
  -3   9  37   81.86    6.52
  -3  -9  37   82.96    6.74
  -3  -9  37   90.37    7.48
   3  -9 -37   82.68    6.49
  -3   9  39  166.70   10.89
  -3  -9  39  190.20   12.49
  -3  -9  39  188.70   12.18
   3  -9 -39  179.60   11.70
  -3   9  41   12.12    2.70
  -3  -9  41    3.37    3.56
  -3  -9  41   15.23    3.23
   3  -9 -41   10.21    2.91
  -3   9  43   45.16    4.37
  -3  -9  43   52.18    4.89
  -3  -9  43   46.76    4.53
   3  -9 -43   50.32    4.74
  -3   9  45   84.19    6.43
  -3  -9  45   88.16    6.79
  -3  -9  45   81.57    6.26
   3  -9 -45   71.75    5.74
  -3   9  47   79.40    6.22
  -3  -9  47   66.90    5.43
  -3  -9  47   69.49    5.67
   3  -9 -47   70.53    5.70
  -3   9  49   81.93    6.14
  -3   9  49   74.53    5.53
  -3  -9  49   73.24    5.83
  -3  -9  49   88.01    6.61
  -3   9  51  192.80   12.17
  -3   9  51  223.80   13.93
  -3  -9  51  231.60   14.50
  -3  -9  51  258.10   15.92
  -3   9  53   53.45    4.61
  -3   9  53   70.00    5.47
  -3  -9  53   59.89    4.94
  -3  -9  53   56.51    4.87
  -3   9  55   19.25    3.18
  -3   9  55   27.92    3.73
  -3  -9  55   23.86    3.64
  -3  -9  55   25.53    3.64
  -3   9  57    2.46    2.97
  -3   9  57    1.62    2.83
  -3  -9  57    3.26    3.12
  -3  -9  57    0.91    2.97
  -3  -9  59   17.68    3.71
  -3  -9  59   13.60    3.26
  -3  -9  61    3.61    2.56
  -3  -9  61    1.89    2.38
  -3  11   1  339.00   21.03
   3  11  -1  338.30   21.08
  -3 -11  -1  324.50   20.20
   3  11   1  338.50   20.90
  -3 -11   1  336.50   20.80
   3 -11  -1  329.50   20.47
  -3  11  -1  316.60   19.85
   3 -11   3  420.30   25.61
  -3  11   3  427.90   26.31
   3  11  -3  437.70   26.83
  -3 -11  -3  526.50   31.56
   3  11   3  459.20   27.87
   3 -11  -3  445.70   27.25
  -3  11  -3  420.70   25.56
   3 -11   5  212.20   13.80
  -3  11   5  173.80   12.13
   3  11  -5  197.60   13.27
  -3 -11  -5  205.00   13.51
   3  11   5  185.90   12.36
  -3 -11   5  209.90   13.93
   3 -11  -5  181.60   12.34
  -3  11  -5  178.20   11.65
   3 -11   7   19.51    4.26
  -3  11   7   20.83    4.79
   3  11  -7   21.82    4.63
  -3 -11  -7   21.31    4.42
   3  11   7   11.33    3.95
  -3 -11   7   17.07    4.56
   3 -11  -7   15.89    4.61
  -3  11  -7   20.53    4.11
   3 -11   9  136.60    9.62
  -3  11   9  152.20   10.40
   3  11  -9  155.20   11.18
  -3 -11  -9  144.30    9.88
   3  11   9  136.50    9.39
  -3 -11   9  161.50   11.36
   3 -11  -9  140.60    9.93
  -3  11  -9  144.40    9.97
   3 -11  11   21.76    4.05
  -3  11  11   22.06    4.77
   3  11 -11   21.41    3.83
  -3 -11 -11   24.05    3.99
   3  11  11   20.81    3.69
  -3 -11  11   21.55    4.77
   3 -11 -11   21.86    3.98
  -3  11 -11   16.08    3.79
   3 -11  13  122.10    8.63
  -3  11  13  123.60    9.17
   3  11 -13  111.50    8.70
  -3 -11 -13  127.50    8.85
   3  11  13  102.50    7.49
  -3 -11  13  115.80    8.86
   3 -11 -13  119.20    8.67
  -3  11 -13  120.30    8.51
   3 -11  15    8.07    3.25
  -3  11  15    8.56    3.86
  -3 -11 -15    6.38    3.24
   3  11  15    6.50    3.00
  -3 -11  15    5.21    4.18
  -3 -11  15    5.47    4.28
   3 -11 -15    6.03    3.36
  -3  11 -15    1.98    3.08
   3 -11  17  587.70   34.87
  -3  11  17  612.10   36.55
  -3 -11 -17  621.30   36.78
   3  11  17  630.70   37.22
  -3 -11  17  694.00   41.28
  -3 -11  17  599.00   35.88
   3 -11 -17  638.60   38.00
  -3  11 -17  617.70   36.69
   3 -11  19   19.09    3.34
  -3  11  19   23.68    4.23
  -3 -11 -19   17.42    3.14
   3  11  19   18.14    2.70
  -3 -11  19   26.31    4.77
  -3 -11  19   15.85    4.16
   3 -11 -19   17.85    4.00
  -3  11 -19   20.90    3.35
   3 -11  21 1592.00   92.81
  -3  11  21 1567.00   91.56
  -3 -11 -21 1654.00   96.34
   3  11  21 1545.00   89.88
  -3 -11  21 1480.00   86.55
  -3 -11  21 1557.00   91.02
   3 -11 -21 1536.00   89.82
  -3  11 -21 1572.00   91.63
   3 -11  23   88.66    6.38
  -3  11  23   91.52    6.82
   3  11  23   85.70    6.01
  -3 -11  23   93.75    7.47
  -3 -11  23  106.10    7.69
   3 -11 -23   81.93    6.56
  -3  11 -23   90.46    6.46
   3 -11  25  520.40   30.82
  -3  11  25  461.30   27.68
  -3 -11 -25  506.40   29.90
   3  11  25  540.10   31.95
  -3 -11  25  532.70   31.79
  -3 -11  25  529.70   31.96
   3 -11 -25  502.90   30.18
  -3  11 -25  504.90   29.98
   3 -11  27  126.60    8.43
  -3  11  27  122.90    8.84
  -3 -11 -27  119.40    7.68
  -3 -11  27  117.70    8.61
  -3 -11  27  122.90    9.01
   3 -11 -27  130.50    9.18
  -3  11 -27  117.60    7.84
   3 -11  29  922.60   54.09
  -3  11  29  982.50   57.96
  -3 -11 -29  811.50   47.47
  -3 -11 -29  973.10   56.84
  -3 -11  29  991.50   58.59
  -3 -11  29 1013.00   59.66
   3 -11 -29  900.90   53.13
  -3  11 -29  892.30   52.27
   3 -11  31  293.20   17.62
  -3  11  31  320.50   19.78
  -3 -11 -31  322.10   19.19
  -3 -11 -31  333.30   19.81
  -3 -11  31  297.70   18.58
  -3 -11  31  300.00   18.56
   3 -11 -31  311.20   19.11
  -3  11 -31  331.40   19.88
   3 -11  33  183.90   11.39
  -3  11  33  187.20   12.05
  -3 -11 -33  201.50   12.13
  -3 -11 -33  183.10   11.07
  -3 -11  33  188.00   12.29
  -3 -11  33  224.60   14.41
   3 -11 -33  193.30   12.54
  -3  11 -33  187.00   11.59
   3 -11  35   57.36    4.28
  -3  11  35   62.70    5.48
  -3 -11 -35   54.88    3.61
  -3 -11 -35   55.88    3.65
  -3 -11  35   53.22    5.02
  -3 -11  35   56.73    5.27
   3 -11 -35   76.70    6.38
  -3  11 -35   54.37    4.17
   3 -11  37  195.70   11.80
  -3  11  37  176.90   11.55
  -3 -11  37  190.10   12.37
  -3 -11  37  162.90   10.97
   3 -11 -37  197.10   12.79
  -3  11 -37  186.20   11.38
   3 -11  39  497.10   29.27
  -3  11  39  513.30   30.85
  -3 -11  39  477.20   28.72
  -3 -11  39  517.40   31.10
   3 -11 -39  518.80   31.08
  -3  11 -39  556.00   32.72
  -3  11  41   69.51    5.74
  -3 -11  41   72.40    5.82
  -3 -11  41   66.21    5.89
   3 -11 -41   56.50    5.24
  -3  11  43    3.09    2.93
  -3 -11  43    6.91    3.33
  -3 -11  43    0.75    3.21
   3 -11 -43   -2.38    2.70
  -3  11  45   25.33    3.44
  -3 -11  45   37.39    4.15
  -3 -11  45   39.38    4.37
   3 -11 -45   31.68    3.90
  -3  11  47   40.60    4.02
  -3 -11  47   35.92    4.07
  -3 -11  47   37.05    4.20
   3 -11 -47   30.61    3.77
  -3  11  49   27.74    3.54
  -3 -11  49   21.71    3.58
   3 -11 -49   30.38    3.65
  -3  11  51   17.27    3.12
  -3 -11  51    7.44    2.84
  -3 -11  51    8.94    3.32
  -3  11  53   23.81    3.71
  -3  11  53   15.67    3.10
  -3 -11  53   18.33    3.27
  -3 -11  53   13.01    3.14
  -3  11  55    2.79    3.13
  -3  11  55    4.03    2.77
  -3 -11  55   -0.76    3.11
  -3 -11  55   -0.72    3.37
  -3  11  57    8.89    3.20
  -3  11  57   10.00    2.94
  -3 -11  57    9.75    3.33
  -3 -11  57   10.71    3.33
  -3 -11  59   23.67    3.75
  -3 -11  59   26.58    3.93
  -3 -11  61   -1.82    2.85
  -3 -11  61   -3.02    3.11
   3 -13   1   -5.24    3.92
  -3  13   1    1.06    4.17
   3  13  -1    3.59    4.25
  -3 -13  -1    3.98    3.29
   3  13   1   -0.23    3.27
  -3 -13   1    1.41    4.11
   3 -13  -1   -1.57    3.96
  -3  13  -1   -3.16    4.70
   3 -13   3   -3.11    3.82
  -3  13   3    1.10    3.28
   3  13  -3   -4.39    4.35
  -3 -13  -3   -4.47    4.22
   3  13   3    4.75    4.38
  -3 -13   3    1.89    4.28
   3 -13  -3   -2.85    4.31
  -3  13  -3    1.84    4.41
   3 -13   5  451.10   27.24
  -3  13   5  444.10   27.00
   3  13  -5  460.80   28.12
  -3 -13  -5  462.70   27.91
   3  13   5  470.30   28.57
  -3 -13   5  408.90   24.84
  -3  13  -5  448.20   27.22
   3 -13   7  132.40    9.56
  -3  13   7  128.10    9.60
   3  13  -7  138.80    9.87
  -3 -13  -7  119.70    8.66
   3  13   7  141.00   10.01
  -3 -13   7  122.70    9.26
   3 -13  -7  110.50    8.55
  -3  13  -7  130.00    9.30
   3 -13   9   87.53    7.06
  -3  13   9   91.67    7.79
   3  13  -9   90.19    7.74
  -3 -13  -9   87.63    6.78
  -3 -13   9   81.10    6.58
   3 -13  -9   90.31    7.18
  -3  13  -9  100.10    7.82
   3 -13  11   44.97    4.99
  -3  13  11   55.65    5.90
   3  13 -11   51.26    5.42
  -3 -13 -11   42.68    4.96
  -3 -13  11   58.15    6.13
   3 -13 -11   49.42    5.66
  -3  13 -11   45.89    4.44
   3 -13  13   -4.92    3.35
  -3  13  13   -1.00    2.85
   3  13 -13    1.27    4.15
  -3 -13 -13   -2.02    3.35
   3  13  13    0.52    3.33
  -3 -13  13    1.27    4.25
   3 -13 -13    4.90    4.02
  -3  13 -13   -2.41    3.42
   3 -13  15   -0.05    3.27
  -3  13  15    6.03    3.31
   3  13 -15    0.53    3.49
  -3 -13 -15    1.64    3.24
   3  13  15    0.78    3.13
  -3 -13  15    0.23    3.97
   3 -13 -15    0.82    3.67
  -3  13 -15    5.16    3.39
   3 -13  17  370.60   22.54
  -3  13  17  342.40   21.04
   3  13 -17  365.20   22.47
  -3 -13 -17  392.40   23.73
   3  13  17  374.70   22.64
  -3 -13  17  406.00   24.87
[truncated: 1,410,499 more chars]
