# Supplementary material for: 3D Metal–Organic Frameworks Based on Co(II) and Bithiophendicarboxylate: Synthesis, Crystal Structures, Gas Adsorption, and Magnetic Properties
Source: Molecules. 2021 Feb 26;26(5):1269. doi: 10.3390/molecules26051269 (PMC7956319; doi:10.3390/molecules26051269)
Supplement: Supplementary file 1 [file molecules-26-01269-s001.zip › 3.cif]

# [Co3(dmf)4(C10H4S2O4)3]*2DMF*2H2O 
data_pz-2_sq

_audit_creation_method           SHELXL-2018/3
_shelx_SHELXL_version_number     2018/3
_chemical_name_systematic        ?
_chemical_name_common            ?
_chemical_melting_point          ?
_chemical_formula_moiety         ?
_chemical_formula_sum            'C48 H58 Co3 N6 O20 S6'
_chemical_formula_weight         1408.15

loop_
_atom_type_symbol
_atom_type_description
_atom_type_scat_dispersion_real
_atom_type_scat_dispersion_imag
_atom_type_scat_source
C C 0.0046 0.0022 'International Tables Vol C Tables 4.2.6.8 and 6.1.1.4'
H H 0.0000 0.0000 'International Tables Vol C Tables 4.2.6.8 and 6.1.1.4'
N N 0.0087 0.0044 'International Tables Vol C Tables 4.2.6.8 and 6.1.1.4'
O O 0.0147 0.0080 'International Tables Vol C Tables 4.2.6.8 and 6.1.1.4'
S S 0.1503 0.1565 'International Tables Vol C Tables 4.2.6.8 and 6.1.1.4'
Co Co 0.3455 1.1930 'International Tables Vol C Tables 4.2.6.8 and 6.1.1.4'

_space_group_crystal_system      monoclinic
_space_group_IT_number           14
_space_group_name_H-M_alt        'P 21/c'
_space_group_name_Hall           '-P 2ybc'

_shelx_space_group_comment       
;
The symmetry employed for this shelxl refinement is uniquely defined
by the following loop, which should always be used as a source of
symmetry information in preference to the above space-group names.
They are only intended as comments.
;

loop_
_space_group_symop_operation_xyz
'x, y, z'
'-x, y+1/2, -z+1/2'
'-x, -y, -z'
'x, -y-1/2, z-1/2'

_cell_length_a                   11.96(2)
_cell_length_b                   25.867(8)
_cell_length_c                   11.461(16)
_cell_angle_alpha                90
_cell_angle_beta                 106.49(3)
_cell_angle_gamma                90
_cell_volume                     3400(8)
_cell_formula_units_Z            2
_cell_measurement_temperature    100(2)
_cell_measurement_reflns_used    12761
_cell_measurement_theta_min      2.5
_cell_measurement_theta_max      30.0

_exptl_crystal_description       block
_exptl_crystal_colour            red
_exptl_crystal_density_meas      ?
_exptl_crystal_density_method    ?
_exptl_crystal_density_diffrn    1.376
_exptl_crystal_F_000             1450
_exptl_transmission_factor_min   ?
_exptl_transmission_factor_max   ?
_exptl_crystal_size_max          0.05
_exptl_crystal_size_mid          0.05
_exptl_crystal_size_min          0.02
_exptl_absorpt_coefficient_mu    1.309
_shelx_estimated_absorpt_T_min   0.937
_shelx_estimated_absorpt_T_max   0.974
_exptl_absorpt_correction_type   multi-scan
_exptl_absorpt_correction_T_min  0.7164
_exptl_absorpt_correction_T_max  1.0000
_exptl_absorpt_process_details   'XDS (Kabsch, 2010)'
_exptl_absorpt_special_details   ?

_diffrn_radiation_source         synchrotron
_diffrn_radiation_monochromator  'Double Crystal Monochromator'
_diffrn_ambient_temperature      100(2)
_diffrn_radiation_wavelength     0.79313
_diffrn_radiation_type           synchrotron
_diffrn_source                   synchrotron
_diffrn_measurement_device_type  'Rayonix SX-165 CCD'
_diffrn_measurement_method       '\f scan'
_diffrn_detector_area_resol_mean 12.4
_diffrn_reflns_number            28176
_diffrn_reflns_av_unetI/netI     0.0644
_diffrn_reflns_av_R_equivalents  0.0782
_diffrn_reflns_limit_h_min       -14
_diffrn_reflns_limit_h_max       14
_diffrn_reflns_limit_k_min       -33
_diffrn_reflns_limit_k_max       33
_diffrn_reflns_limit_l_min       -15
_diffrn_reflns_limit_l_max       15
_diffrn_reflns_theta_min         2.579
_diffrn_reflns_theta_max         32.413
_diffrn_reflns_theta_full        28.500
_diffrn_measured_fraction_theta_max 0.850
_diffrn_measured_fraction_theta_full 0.960
_diffrn_reflns_Laue_measured_fraction_max 0.850
_diffrn_reflns_Laue_measured_fraction_full 0.960
_diffrn_reflns_point_group_measured_fraction_max 0.850
_diffrn_reflns_point_group_measured_fraction_full 0.960
_reflns_number_total             7481
_reflns_number_gt                4702
_reflns_threshold_expression     'I > 2\s(I)'
_reflns_Friedel_coverage         0.000
_reflns_Friedel_fraction_max     .
_reflns_Friedel_fraction_full    .

_reflns_special_details          
;
 Reflections were merged by SHELXL according to the crystal
 class for the calculation of statistics and refinement.
 
 Structure factors included contributions from the .fab file.
 
 _reflns_Friedel_fraction is defined as the number of unique
 Friedel pairs measured divided by the number that would be
 possible theoretically, ignoring centric projections and
 systematic absences.
;
_computing_data_collection       'Marccd (Doyle, 2011)'
_computing_cell_refinement       'XDS (Kabsch, 2010)'
_computing_data_reduction        'XDS (Kabsch, 2010)'
_computing_structure_solution    'SHELXT-2018 (Sheldrick, 2015)'
_computing_structure_refinement  'SHELXL-2018 (Sheldrick, 2015)'
_computing_molecular_graphics    'ShelXle (H\"ubschle, 2011)'
_computing_publication_material  'CIFTAB (Sheldrick, 2015)'

_refine_special_details          ?
_refine_ls_structure_factor_coef Fsqd
_refine_ls_matrix_type           full
_refine_ls_weighting_scheme      calc
_refine_ls_weighting_details     
'w=1/[\s^2^(Fo^2^)+(0.1484P)^2^] where P=(Fo^2^+2Fc^2^)/3'
_atom_sites_solution_primary     dual
_atom_sites_solution_secondary   difmap
_atom_sites_solution_hydrogens   geom
_refine_ls_hydrogen_treatment    constr
_refine_ls_extinction_method     none
_refine_ls_extinction_coef       .
_refine_ls_number_reflns         7481
_refine_ls_number_parameters     401
_refine_ls_number_restraints     319
_refine_ls_R_factor_all          0.1170
_refine_ls_R_factor_gt           0.0762
_refine_ls_wR_factor_ref         0.2365
_refine_ls_wR_factor_gt          0.2142
_refine_ls_goodness_of_fit_ref   1.044
_refine_ls_restrained_S_all      1.076
_refine_ls_shift/su_max          0.001
_refine_ls_shift/su_mean         0.000

loop_
_atom_site_label
_atom_site_type_symbol
_atom_site_fract_x
_atom_site_fract_y
_atom_site_fract_z
_atom_site_U_iso_or_equiv
_atom_site_adp_type
_atom_site_occupancy
_atom_site_site_symmetry_order
_atom_site_calc_flag
_atom_site_refinement_flags_posn
_atom_site_refinement_flags_adp
_atom_site_refinement_flags_occupancy
_atom_site_disorder_assembly
_atom_site_disorder_group
Co1 Co 0.28005(7) 0.46852(2) 0.64189(6) 0.0500(2) Uani 1 1 d D . . . .
Co2 Co 0.500000 0.500000 0.500000 0.0401(2) Uani 1 2 d S . P . .
O11 O 0.1857(4) 0.47610(16) 0.4726(3) 0.0586(10) Uani 1 1 d . . . . .
O12 O 0.3330(4) 0.47978(13) 0.3819(3) 0.0492(9) Uani 1 1 d . . . . .
C11 C 0.2261(5) 0.47898(19) 0.3854(4) 0.0503(13) Uani 1 1 d . . . . .
C12 C 0.1288(5) 0.4816(2) 0.2705(4) 0.0545(13) Uani 1 1 d . . . . .
C13 C 0.0070(6) 0.4778(3) 0.2492(5) 0.0657(16) Uani 1 1 d . . . . .
H13 H -0.027489 0.469710 0.312127 0.079 Uiso 1 1 calc R U . . .
C14 C -0.0584(6) 0.4865(3) 0.1314(5) 0.0692(17) Uani 1 1 d . . . . .
H14 H -0.141130 0.486793 0.102609 0.083 Uiso 1 1 calc R U . . .
C15 C 0.0176(5) 0.4949(2) 0.0623(5) 0.0567(14) Uani 1 1 d . . . . .
S1 S 0.16770(13) 0.49408(6) 0.14388(12) 0.0570(4) Uani 1 1 d . . . . .
O21 O 0.3651(4) 0.40183(14) 0.6258(4) 0.0693(12) Uani 1 1 d . . . . .
O22 O 0.5300(4) 0.42670(12) 0.5735(3) 0.0542(9) Uani 1 1 d . . . . .
O23 O 0.5835(3) 0.02266(12) 0.8711(3) 0.0442(8) Uani 1 1 d . . . . .
O24 O 0.7434(4) 0.05078(15) 0.8236(4) 0.0651(11) Uani 1 1 d . . . . .
C201 C 0.4711(6) 0.39577(17) 0.6106(4) 0.0526(14) Uani 1 1 d . . . . .
C202 C 0.5186(6) 0.3428(2) 0.6413(6) 0.0748(16) Uani 1 1 d D U . . .
C203 C 0.6102(10) 0.3180(4) 0.5976(12) 0.091(3) Uani 0.681(18) 1 d D U P A 1
H203 H 0.651291 0.335289 0.549261 0.109 Uiso 0.681(18) 1 calc R U P A 1
C204 C 0.6302(11) 0.2671(4) 0.6343(12) 0.094(3) Uani 0.681(18) 1 d D U P A 1
H204 H 0.682914 0.244391 0.611875 0.112 Uiso 0.681(18) 1 calc R U P A 1
C23A C 0.6406(12) 0.3257(8) 0.659(2) 0.098(3) Uani 0.319(18) 1 d D U P A 2
H23A H 0.697552 0.347560 0.641071 0.117 Uiso 0.319(18) 1 calc R U P A 2
C24A C 0.6664(14) 0.2761(8) 0.702(2) 0.100(3) Uani 0.319(18) 1 d D U P A 2
H24A H 0.740190 0.259481 0.720177 0.120 Uiso 0.319(18) 1 calc R U P A 2
C205 C 0.5558(7) 0.2535(2) 0.7146(7) 0.0866(18) Uani 1 1 d D U . . .
C206 C 0.5531(7) 0.2025(2) 0.7635(7) 0.078(2) Uani 1 1 d . . . . .
C207 C 0.4590(7) 0.1805(2) 0.7940(7) 0.080(2) Uani 1 1 d . . . . .
H207 H 0.389801 0.198536 0.793761 0.096 Uiso 1 1 calc R U . . .
C208 C 0.4795(6) 0.1274(2) 0.8254(6) 0.0633(15) Uani 1 1 d . . . . .
H208 H 0.424365 0.105406 0.845786 0.076 Uiso 1 1 calc R U . . .
C209 C 0.5905(6) 0.11151(19) 0.8227(5) 0.0548(14) Uani 1 1 d . . . . .
C210 C 0.6435(5) 0.05910(19) 0.8403(4) 0.0505(13) Uani 1 1 d . . . . .
S21 S 0.4574(5) 0.30067(16) 0.7169(7) 0.0644(12) Uani 0.681(18) 1 d D U P A 1
S21A S 0.4425(7) 0.2955(3) 0.6857(13) 0.061(2) Uani 0.319(18) 1 d D U P A 2
S22 S 0.67009(16) 0.15999(5) 0.77785(17) 0.0703(5) Uani 1 1 d . . . . .
O1D O 0.3433(11) 0.4636(6) 0.8267(6) 0.077(3) Uani 0.547(6) 1 d D U P B 1
C11D C 0.4566(14) 0.4550(5) 0.8593(10) 0.086(3) Uani 0.547(6) 1 d D U P B 1
H11D H 0.503377 0.469209 0.812745 0.104 Uiso 0.547(6) 1 calc R U P B 1
N1D N 0.5060(11) 0.4264(4) 0.9572(10) 0.113(3) Uani 0.547(6) 1 d D U P B 1
C12D C 0.6282(13) 0.4160(7) 0.9986(13) 0.113(4) Uani 0.547(6) 1 d D U P B 1
H12A H 0.651288 0.410308 1.086748 0.170 Uiso 0.547(6) 1 calc R U P B 1
H12B H 0.671337 0.445559 0.979705 0.170 Uiso 0.547(6) 1 calc R U P B 1
H12C H 0.645837 0.385068 0.957766 0.170 Uiso 0.547(6) 1 calc R U P B 1
C13D C 0.4371(17) 0.4046(8) 1.0275(17) 0.130(3) Uani 0.547(6) 1 d D U P B 1
H13A H 0.425193 0.367712 1.008854 0.195 Uiso 0.547(6) 1 calc R U P B 1
H13B H 0.361382 0.422150 1.007973 0.195 Uiso 0.547(6) 1 calc R U P B 1
H13C H 0.477243 0.409012 1.114251 0.195 Uiso 0.547(6) 1 calc R U P B 1
O1B O 0.3757(14) 0.4607(8) 0.8202(8) 0.083(3) Uani 0.453(6) 1 d D U P B 2
C11B C 0.3588(12) 0.4152(7) 0.8640(14) 0.099(3) Uani 0.453(6) 1 d D U P B 2
H11B H 0.331422 0.387117 0.810046 0.119 Uiso 0.453(6) 1 calc R U P B 2
N1B N 0.3797(11) 0.4083(6) 0.9829(14) 0.123(3) Uani 0.453(6) 1 d D U P B 2
C12B C 0.3624(19) 0.3593(8) 1.031(2) 0.134(5) Uani 0.453(6) 1 d D U P B 2
H12D H 0.333665 0.364139 1.102375 0.201 Uiso 0.453(6) 1 calc R U P B 2
H12E H 0.436537 0.340439 1.055128 0.201 Uiso 0.453(6) 1 calc R U P B 2
H12F H 0.305189 0.339453 0.969114 0.201 Uiso 0.453(6) 1 calc R U P B 2
C13B C 0.422(2) 0.4494(7) 1.0664(17) 0.114(4) Uani 0.453(6) 1 d D U P B 2
H13D H 0.393483 0.444780 1.138080 0.171 Uiso 0.453(6) 1 calc R U P B 2
H13E H 0.393484 0.482426 1.027274 0.171 Uiso 0.453(6) 1 calc R U P B 2
H13F H 0.507174 0.449184 1.091402 0.171 Uiso 0.453(6) 1 calc R U P B 2
O2D O 0.1388(5) 0.4292(2) 0.6734(5) 0.0854(15) Uani 1 1 d . U . . .
C21D C 0.0451(11) 0.4217(4) 0.6162(11) 0.116(3) Uani 1 1 d . U . . .
H21D H 0.022421 0.435536 0.536151 0.140 Uiso 1 1 calc R U . . .
N2D N -0.0392(10) 0.3940(4) 0.6532(12) 0.140(3) Uani 1 1 d . U . . .
C22D C -0.1552(12) 0.3899(5) 0.5776(14) 0.160(4) Uani 1 1 d . U . . .
H22A H -0.174348 0.353443 0.558894 0.240 Uiso 1 1 calc R U . . .
H22B H -0.162873 0.408967 0.501783 0.240 Uiso 1 1 calc R U . . .
H22C H -0.208768 0.404492 0.619666 0.240 Uiso 1 1 calc R U . . .
C23D C -0.0158(13) 0.3761(5) 0.7741(15) 0.165(4) Uani 1 1 d . U . . .
H23B H -0.085485 0.380245 0.801944 0.248 Uiso 1 1 calc R U . . .
H23C H 0.048588 0.396079 0.826739 0.248 Uiso 1 1 calc R U . . .
H23D H 0.005912 0.339457 0.777449 0.248 Uiso 1 1 calc R U . . .

loop_
_atom_site_aniso_label
_atom_site_aniso_U_11
_atom_site_aniso_U_22
_atom_site_aniso_U_33
_atom_site_aniso_U_23
_atom_site_aniso_U_13
_atom_site_aniso_U_12
Co1 0.0778(6) 0.0331(3) 0.0376(3) -0.0004(2) 0.0141(3) -0.0038(3)
Co2 0.0633(6) 0.0254(4) 0.0257(4) 0.0018(3) 0.0031(3) 0.0003(3)
O11 0.066(3) 0.065(2) 0.0402(18) 0.0014(16) 0.0076(16) -0.0017(19)
O12 0.066(3) 0.0439(17) 0.0308(15) -0.0044(13) 0.0020(14) -0.0004(16)
C11 0.069(4) 0.040(2) 0.033(2) -0.0007(17) 0.001(2) -0.002(2)
C12 0.062(4) 0.058(3) 0.037(2) 0.003(2) 0.004(2) 0.002(3)
C13 0.062(4) 0.082(4) 0.042(3) 0.000(3) -0.002(2) 0.003(3)
C14 0.058(4) 0.094(5) 0.045(3) 0.002(3) -0.003(2) -0.005(3)
C15 0.054(3) 0.072(4) 0.038(3) 0.006(2) 0.003(2) 0.001(3)
S1 0.0573(9) 0.0681(9) 0.0384(6) 0.0015(5) 0.0022(5) -0.0006(6)
O21 0.093(3) 0.0329(18) 0.081(3) 0.0126(18) 0.023(2) 0.0066(18)
O22 0.084(3) 0.0309(16) 0.0456(18) 0.0124(13) 0.0158(18) 0.0071(16)
O23 0.067(2) 0.0300(15) 0.0319(14) 0.0028(11) 0.0074(14) 0.0014(14)
O24 0.091(3) 0.0392(19) 0.073(3) 0.0186(17) 0.036(2) 0.0132(19)
C201 0.084(4) 0.029(2) 0.038(2) 0.0038(17) 0.005(2) 0.002(2)
C202 0.105(4) 0.040(2) 0.087(4) 0.027(3) 0.039(3) 0.010(3)
C203 0.129(6) 0.056(4) 0.099(6) 0.035(4) 0.052(5) 0.018(4)
C204 0.129(6) 0.061(4) 0.104(6) 0.032(5) 0.053(5) 0.024(4)
C23A 0.128(6) 0.061(5) 0.111(6) 0.037(6) 0.044(6) 0.011(5)
C24A 0.127(6) 0.062(5) 0.114(6) 0.039(6) 0.041(6) 0.019(5)
C205 0.112(4) 0.049(3) 0.107(4) 0.035(3) 0.045(3) 0.017(3)
C206 0.107(6) 0.043(3) 0.093(5) 0.031(3) 0.042(4) 0.016(3)
C207 0.103(5) 0.048(3) 0.102(5) 0.038(3) 0.047(4) 0.027(3)
C208 0.085(4) 0.041(3) 0.068(4) 0.021(2) 0.030(3) 0.011(3)
C209 0.085(4) 0.034(2) 0.043(2) 0.0097(18) 0.013(2) 0.005(2)
C210 0.076(4) 0.039(2) 0.033(2) 0.0030(17) 0.011(2) 0.001(2)
S21 0.107(2) 0.0319(13) 0.060(3) 0.0127(13) 0.0329(19) 0.0091(13)
S21A 0.090(4) 0.029(2) 0.060(5) 0.009(2) 0.015(3) 0.006(2)
S22 0.0935(12) 0.0382(7) 0.0851(11) 0.0247(7) 0.0349(9) 0.0097(7)
O1D 0.098(5) 0.095(4) 0.039(3) 0.006(3) 0.022(3) -0.013(4)
C11D 0.104(5) 0.099(5) 0.054(4) 0.017(4) 0.019(4) -0.014(4)
N1D 0.123(5) 0.127(5) 0.081(4) 0.029(4) 0.015(4) -0.014(4)
C12D 0.126(8) 0.133(8) 0.069(6) 0.040(6) 0.008(6) -0.021(7)
C13D 0.138(6) 0.134(6) 0.099(5) 0.032(5) 0.004(5) -0.021(5)
O1B 0.101(6) 0.096(5) 0.051(4) 0.014(4) 0.022(4) -0.021(5)
C11B 0.116(5) 0.106(4) 0.066(4) 0.021(4) 0.012(4) -0.021(4)
N1B 0.135(5) 0.125(5) 0.092(5) 0.031(5) 0.005(4) -0.022(5)
C12B 0.146(8) 0.135(8) 0.100(7) 0.034(7) 0.001(7) -0.029(7)
C13B 0.129(6) 0.122(6) 0.081(6) 0.034(6) 0.012(6) -0.016(6)
O2D 0.110(4) 0.064(3) 0.092(4) -0.003(2) 0.043(3) -0.020(3)
C21D 0.140(6) 0.084(5) 0.128(6) 0.008(5) 0.043(5) -0.022(5)
N2D 0.151(6) 0.092(4) 0.172(7) 0.032(5) 0.036(5) -0.023(4)
C22D 0.163(9) 0.100(6) 0.186(9) 0.031(7) -0.002(8) 0.005(7)
C23D 0.178(9) 0.123(8) 0.177(10) 0.001(7) 0.022(8) -0.003(7)

_geom_special_details            
;
 All esds (except the esd in the dihedral angle between two l.s. planes)
 are estimated using the full covariance matrix.  The cell esds are taken
 into account individually in the estimation of esds in distances, angles
 and torsion angles; correlations between esds in cell parameters are only
 used when they are defined by crystal symmetry.  An approximate (isotropic)
 treatment of cell esds is used for estimating esds involving l.s. planes.
;

loop_
_geom_bond_atom_site_label_1
_geom_bond_atom_site_label_2
_geom_bond_distance
_geom_bond_site_symmetry_2
_geom_bond_publ_flag
Co1 O11 1.958(4) . ?
Co1 O21 2.037(4) . ?
Co1 O23 2.187(4) 2_656 ?
Co1 O24 2.197(4) 2_656 ?
Co1 C210 2.502(5) 2_656 ?
Co1 O1D 2.041(7) . ?
Co1 O1B 2.049(8) . ?
Co1 O2D 2.088(6) . ?
Co2 O12 2.136(5) . ?
Co2 O12 2.136(5) 3_666 ?
Co2 O22 2.064(3) . ?
Co2 O22 2.064(3) 3_666 ?
Co2 O23 2.089(4) 2_656 ?
Co2 O23 2.089(4) 4_565 ?
O11 C11 1.229(7) . ?
O12 C11 1.290(7) . ?
C11 C12 1.491(7) . ?
C12 C13 1.411(10) . ?
C12 S1 1.676(6) . ?
C13 H13 0.9500 . ?
C13 C14 1.373(8) . ?
C14 H14 0.9500 . ?
C14 C15 1.382(9) . ?
C15 C15 1.395(10) 3_565 ?
C15 S1 1.773(7) . ?
O21 C201 1.336(8) . ?
O22 C201 1.219(7) . ?
O23 C210 1.293(6) . ?
O24 C210 1.281(8) . ?
C201 C202 1.486(7) . ?
C202 C203 1.475(10) . ?
C202 C23A 1.484(12) . ?
C202 S21 1.684(7) . ?
C202 S21A 1.688(8) . ?
C203 H203 0.9500 . ?
C203 C204 1.382(11) . ?
C204 H204 0.9500 . ?
C204 C205 1.492(10) . ?
C23A H23A 0.9500 . ?
C23A C24A 1.379(13) . ?
C24A H24A 0.9500 . ?
C24A C205 1.489(12) . ?
C205 C206 1.437(8) . ?
C205 S21 1.700(7) . ?
C205 S21A 1.694(9) . ?
C206 C207 1.392(10) . ?
C206 S22 1.751(7) . ?
C207 H207 0.9500 . ?
C207 C208 1.422(7) . ?
C208 H208 0.9500 . ?
C208 C209 1.399(9) . ?
C209 C210 1.486(7) . ?
C209 S22 1.738(6) . ?
O1D C11D 1.318(18) . ?
C11D H11D 0.9500 . ?
C11D N1D 1.333(15) . ?
N1D C12D 1.429(14) . ?
N1D C13D 1.422(14) . ?
C12D H12A 0.9800 . ?
C12D H12B 0.9800 . ?
C12D H12C 0.9800 . ?
C13D H13A 0.9800 . ?
C13D H13B 0.9800 . ?
C13D H13C 0.9800 . ?
O1B C11B 1.318(19) . ?
C11B H11B 0.9500 . ?
C11B N1B 1.325(16) . ?
N1B C12B 1.422(14) . ?
N1B C13B 1.423(14) . ?
C12B H12D 0.9800 . ?
C12B H12E 0.9800 . ?
C12B H12F 0.9800 . ?
C13B H13D 0.9800 . ?
C13B H13E 0.9800 . ?
C13B H13F 0.9800 . ?
O2D C21D 1.144(12) . ?
C21D H21D 0.9500 . ?
C21D N2D 1.397(14) . ?
N2D C22D 1.416(15) . ?
N2D C23D 1.412(18) . ?
C22D H22A 0.9800 . ?
C22D H22B 0.9800 . ?
C22D H22C 0.9800 . ?
C23D H23B 0.9800 . ?
C23D H23C 0.9800 . ?
C23D H23D 0.9800 . ?

loop_
_geom_angle_atom_site_label_1
_geom_angle_atom_site_label_2
_geom_angle_atom_site_label_3
_geom_angle
_geom_angle_site_symmetry_1
_geom_angle_site_symmetry_3
_geom_angle_publ_flag
O11 Co1 O21 99.06(19) . . ?
O11 Co1 O23 95.73(17) . 2_656 ?
O11 Co1 O24 90.81(18) . 2_656 ?
O11 Co1 C210 94.67(17) . 2_656 ?
O11 Co1 O1D 167.0(4) . . ?
O11 Co1 O1B 178.8(5) . . ?
O11 Co1 O2D 87.3(2) . . ?
O21 Co1 O23 97.73(19) . 2_656 ?
O21 Co1 O24 158.27(19) . 2_656 ?
O21 Co1 C210 128.3(2) . 2_656 ?
O21 Co1 O1D 89.6(4) . . ?
O21 Co1 O1B 81.6(6) . . ?
O21 Co1 O2D 93.0(2) . . ?
O23 Co1 O24 61.83(16) 2_656 2_656 ?
O23 Co1 C210 31.09(16) 2_656 2_656 ?
O24 Co1 C210 30.76(18) 2_656 2_656 ?
O1D Co1 O23 92.7(5) . 2_656 ?
O1D Co1 O24 84.4(4) . 2_656 ?
O1D Co1 C210 87.4(5) . 2_656 ?
O1D Co1 O2D 82.5(5) . . ?
O1B Co1 C210 85.6(6) . 2_656 ?
O1B Co1 O2D 91.7(6) . . ?
O2D Co1 O23 168.18(18) . 2_656 ?
O2D Co1 O24 106.8(2) . 2_656 ?
O2D Co1 C210 137.4(2) . 2_656 ?
O12 Co2 O12 180.0 . 3_666 ?
O22 Co2 O12 86.76(15) . 3_666 ?
O22 Co2 O12 86.76(15) 3_666 . ?
O22 Co2 O12 93.24(15) 3_666 3_666 ?
O22 Co2 O12 93.25(15) . . ?
O22 Co2 O22 180.0 . 3_666 ?
O22 Co2 O23 88.19(15) . 4_565 ?
O22 Co2 O23 88.19(15) 3_666 2_656 ?
O22 Co2 O23 91.81(15) . 2_656 ?
O22 Co2 O23 91.81(15) 3_666 4_565 ?
O23 Co2 O12 88.18(18) 2_656 . ?
O23 Co2 O12 88.18(18) 4_565 3_666 ?
O23 Co2 O12 91.82(18) 2_656 3_666 ?
O23 Co2 O12 91.82(18) 4_565 . ?
O23 Co2 O23 180.0 4_565 2_656 ?
C11 O11 Co1 124.2(4) . . ?
C11 O12 Co2 137.8(3) . . ?
O11 C11 O12 130.4(5) . . ?
O11 C11 C12 109.4(6) . . ?
O12 C11 C12 120.2(5) . . ?
C11 C12 S1 115.8(5) . . ?
C13 C12 C11 131.2(5) . . ?
C13 C12 S1 113.0(4) . . ?
C12 C13 H13 122.2 . . ?
C14 C13 C12 115.5(6) . . ?
C14 C13 H13 122.2 . . ?
C13 C14 H14 126.1 . . ?
C13 C14 C15 107.8(6) . . ?
C15 C14 H14 126.1 . . ?
C14 C15 C15 124.1(7) . 3_565 ?
C14 C15 S1 115.4(4) . . ?
C15 C15 S1 120.5(6) 3_565 . ?
C12 S1 C15 88.3(3) . . ?
C201 O21 Co1 128.9(3) . . ?
C201 O22 Co2 134.0(4) . . ?
Co2 O23 Co1 112.59(15) 2_646 2_646 ?
C210 O23 Co1 88.0(3) . 2_646 ?
C210 O23 Co2 144.2(3) . 2_646 ?
C210 O24 Co1 87.9(3) . 2_646 ?
O21 C201 C202 113.0(5) . . ?
O22 C201 O21 129.2(5) . . ?
O22 C201 C202 117.9(6) . . ?
C201 C202 S21 121.7(5) . . ?
C201 C202 S21A 122.5(6) . . ?
C203 C202 C201 126.2(6) . . ?
C203 C202 S21 111.5(5) . . ?
C23A C202 C201 127.1(10) . . ?
C23A C202 S21A 109.6(10) . . ?
C202 C203 H203 123.5 . . ?
C204 C203 C202 113.1(8) . . ?
C204 C203 H203 123.5 . . ?
C203 C204 H204 125.3 . . ?
C203 C204 C205 109.3(8) . . ?
C205 C204 H204 125.3 . . ?
C202 C23A H23A 122.0 . . ?
C24A C23A C202 115.9(16) . . ?
C24A C23A H23A 122.0 . . ?
C23A C24A H24A 126.7 . . ?
C23A C24A C205 106.6(15) . . ?
C205 C24A H24A 126.7 . . ?
C204 C205 S21 112.1(6) . . ?
C24A C205 S21A 114.4(9) . . ?
C206 C205 C204 122.7(7) . . ?
C206 C205 C24A 121.1(10) . . ?
C206 C205 S21 124.0(6) . . ?
C206 C205 S21A 124.0(6) . . ?
C205 C206 S22 120.5(6) . . ?
C207 C206 C205 125.7(6) . . ?
C207 C206 S22 113.6(4) . . ?
C206 C207 H207 124.3 . . ?
C206 C207 C208 111.4(6) . . ?
C208 C207 H207 124.3 . . ?
C207 C208 H208 124.0 . . ?
C209 C208 C207 112.1(6) . . ?
C209 C208 H208 124.0 . . ?
C208 C209 C210 129.5(5) . . ?
C208 C209 S22 113.4(4) . . ?
C210 C209 S22 116.8(5) . . ?
O23 C210 Co1 60.9(3) . 2_646 ?
O23 C210 C209 117.0(5) . . ?
O24 C210 Co1 61.3(3) . 2_646 ?
O24 C210 O23 122.1(5) . . ?
O24 C210 C209 120.9(5) . . ?
C209 C210 Co1 175.8(4) . 2_646 ?
C202 S21 C205 93.0(4) . . ?
C202 S21A C205 93.1(5) . . ?
C209 S22 C206 89.5(3) . . ?
C11D O1D Co1 110.7(8) . . ?
O1D C11D H11D 119.8 . . ?
O1D C11D N1D 120.4(14) . . ?
N1D C11D H11D 119.8 . . ?
C11D N1D C12D 123.4(13) . . ?
C11D N1D C13D 120.5(14) . . ?
C13D N1D C12D 116.1(12) . . ?
N1D C12D H12A 109.5 . . ?
N1D C12D H12B 109.5 . . ?
N1D C12D H12C 109.5 . . ?
H12A C12D H12B 109.5 . . ?
H12A C12D H12C 109.5 . . ?
H12B C12D H12C 109.5 . . ?
N1D C13D H13A 109.5 . . ?
N1D C13D H13B 109.5 . . ?
N1D C13D H13C 109.5 . . ?
H13A C13D H13B 109.5 . . ?
H13A C13D H13C 109.5 . . ?
H13B C13D H13C 109.5 . . ?
C11B O1B Co1 111.5(11) . . ?
O1B C11B H11B 119.8 . . ?
O1B C11B N1B 120.5(16) . . ?
N1B C11B H11B 119.8 . . ?
C11B N1B C12B 120.9(16) . . ?
C11B N1B C13B 121.2(16) . . ?
C12B N1B C13B 117.8(13) . . ?
N1B C12B H12D 109.5 . . ?
N1B C12B H12E 109.5 . . ?
N1B C12B H12F 109.5 . . ?
H12D C12B H12E 109.5 . . ?
H12D C12B H12F 109.5 . . ?
H12E C12B H12F 109.5 . . ?
N1B C13B H13D 109.5 . . ?
N1B C13B H13E 109.5 . . ?
N1B C13B H13F 109.5 . . ?
H13D C13B H13E 109.5 . . ?
H13D C13B H13F 109.5 . . ?
H13E C13B H13F 109.5 . . ?
C21D O2D Co1 133.9(7) . . ?
O2D C21D H21D 117.0 . . ?
O2D C21D N2D 126.0(12) . . ?
N2D C21D H21D 117.0 . . ?
C21D N2D C22D 121.3(12) . . ?
C21D N2D C23D 120.5(12) . . ?
C23D N2D C22D 117.6(12) . . ?
N2D C22D H22A 109.5 . . ?
N2D C22D H22B 109.5 . . ?
N2D C22D H22C 109.5 . . ?
H22A C22D H22B 109.5 . . ?
H22A C22D H22C 109.5 . . ?
H22B C22D H22C 109.5 . . ?
N2D C23D H23B 109.5 . . ?
N2D C23D H23C 109.5 . . ?
N2D C23D H23D 109.5 . . ?
H23B C23D H23C 109.5 . . ?
H23B C23D H23D 109.5 . . ?
H23C C23D H23D 109.5 . . ?

_refine_diff_density_max         0.863
_refine_diff_density_min         -0.875
_refine_diff_density_rms         0.101

_shelx_res_file                  
;
TITL pz-2 in P2(1)/c; 100K; Xcalibur
    pz-2_sq.res
    created by SHELXL-2018/3 at 16:55:15 on 30-Jan-2020
CELL 0.79313  11.960  25.867  11.461  90  106.491  90
ZERR   2.000   0.022   0.008   0.016   0    0.031   0
LATT 1
SYMM -X,0.5+Y,0.5-Z
SFAC C  H   N  O  S  Co
DISP C  0.00462  0.00217 14.32469
DISP H -0.00002  0.00000  0.66622
DISP N  0.00868  0.00437 25.35309
DISP O  0.01466  0.00796 42.75456
DISP S  0.15032  0.15653 721.34853
DISP Co  0.34553  1.19303 5397.21997
UNIT 96 116 12 40 12 6
 
LIST 4 ! automatically inserted. Change 6 to 4 for CHECKCIF!!
TEMP -173
 
L.S. 6 0 55
BOND $H
FMAP 2
PLAN 5
 
OMIT 0
 
OMIT  1   1   2
OMIT  2   1   2
OMIT  1   2   0
 
SADI 0.01 S21 C202  S21 C205  S21A C202  S21A C205
SADI 0.01 C202 C203  C202 C23A  C205 C204  C205 C24A
SADI 0.01 C203 C204  C23A C24A
 
SIMU 0.01 0.01 C202 C203 C204 C205 S21 C23A C24A S21A
 
FLAT 0.02 C202 C203 C204 C205 S21
FLAT 0.02 C202 C23A C24A C205 S21A
 
SADI 0.01 O1D C11D  O1B C11B
SADI 0.01 N1D C11D  N1B C11B
SADI 0.01 N1D C12D  N1D C13D  N1B C12B  N1B C13B
SADI 0.01 C12D C13D  C12B C13B
SADI 0.01 Co1 O1D  Co1 O1B
 
SIMU 0.01 0.01 O1D > C13B
ISOR 0.01 0.02 O1D > C13B
FLAT 0.02 O1D > C13D
FLAT 0.02 O1B > C13B
 
SIMU 0.01 0.01 O2D > C23D
 
ABIN
ACTA 57
 
SIZE 0.05 0.05 0.02
 
WGHT    0.148400
FVAR       0.39506   0.68091   0.54736
CO1   6    0.280052    0.468516    0.641895    11.00000    0.07778    0.03312 =
         0.03756   -0.00043    0.01408   -0.00376
CO2   6    0.500000    0.500000    0.500000    10.50000    0.06333    0.02544 =
         0.02569    0.00177    0.00307    0.00032
O11   4    0.185718    0.476101    0.472582    11.00000    0.06633    0.06458 =
         0.04019    0.00141    0.00763   -0.00165
O12   4    0.332953    0.479783    0.381853    11.00000    0.06562    0.04389 =
         0.03079   -0.00444    0.00195   -0.00042
C11   1    0.226097    0.478975    0.385416    11.00000    0.06917    0.04016 =
         0.03304   -0.00073    0.00059   -0.00229
C12   1    0.128830    0.481575    0.270482    11.00000    0.06236    0.05799 =
         0.03680    0.00266    0.00399    0.00187
C13   1    0.006988    0.477779    0.249203    11.00000    0.06248    0.08248 =
         0.04190    0.00012   -0.00164    0.00307
AFIX  43
H13   2   -0.027489    0.469710    0.312127    11.00000   -1.20000
AFIX   0
C14   1   -0.058405    0.486531    0.131429    11.00000    0.05792    0.09382 =
         0.04487    0.00229   -0.00340   -0.00468
AFIX  43
H14   2   -0.141130    0.486793    0.102609    11.00000   -1.20000
AFIX   0
C15   1    0.017608    0.494890    0.062318    11.00000    0.05443    0.07166 =
         0.03765    0.00606    0.00269    0.00084
S1    5    0.167702    0.494082    0.143881    11.00000    0.05732    0.06815 =
         0.03840    0.00147    0.00215   -0.00060
O21   4    0.365148    0.401830    0.625847    11.00000    0.09307    0.03288 =
         0.08091    0.01261    0.02297    0.00662
O22   4    0.529967    0.426700    0.573494    11.00000    0.08448    0.03087 =
         0.04555    0.01242    0.01585    0.00708
O23   4    0.583483    0.022656    0.871050    11.00000    0.06663    0.03000 =
         0.03188    0.00276    0.00741    0.00135
O24   4    0.743419    0.050782    0.823618    11.00000    0.09106    0.03921 =
         0.07278    0.01863    0.03584    0.01320
C201  1    0.471061    0.395774    0.610595    11.00000    0.08380    0.02882 =
         0.03780    0.00381    0.00507    0.00232
C202  1    0.518582    0.342841    0.641334    11.00000    0.10450    0.04037 =
         0.08683    0.02662    0.03889    0.01033
PART 1  21
C203  1    0.610201    0.318047    0.597635    21.00000    0.12949    0.05640 =
         0.09907    0.03549    0.05191    0.01795
AFIX  43
H203  2    0.651291    0.335289    0.549261    21.00000   -1.20000
AFIX   0
C204  1    0.630150    0.267138    0.634294    21.00000    0.12879    0.06064 =
         0.10383    0.03202    0.05261    0.02383
AFIX  43
H204  2    0.682914    0.244391    0.611875    21.00000   -1.20000
AFIX   0
PART 2 -21
C23A  1    0.640621    0.325689    0.658690   -21.00000    0.12797    0.06094 =
         0.11083    0.03686    0.04425    0.01143
AFIX  43
H23A  2    0.697552    0.347560    0.641071   -21.00000   -1.20000
AFIX   0
C24A  1    0.666353    0.276052    0.701969   -21.00000    0.12675    0.06232 =
         0.11398    0.03889    0.04072    0.01942
AFIX  43
H24A  2    0.740190    0.259481    0.720177   -21.00000   -1.20000
AFIX   0
PART 0
C205  1    0.555833    0.253518    0.714577    11.00000    0.11233    0.04919 =
         0.10662    0.03458    0.04480    0.01712
C206  1    0.553124    0.202542    0.763525    11.00000    0.10686    0.04339 =
         0.09272    0.03126    0.04197    0.01644
C207  1    0.458999    0.180459    0.793962    11.00000    0.10252    0.04801 =
         0.10166    0.03754    0.04670    0.02709
AFIX  43
H207  2    0.389801    0.198536    0.793761    11.00000   -1.20000
AFIX   0
C208  1    0.479546    0.127434    0.825384    11.00000    0.08547    0.04116 =
         0.06810    0.02095    0.02975    0.01117
AFIX  43
H208  2    0.424365    0.105406    0.845786    11.00000   -1.20000
AFIX   0
C209  1    0.590546    0.111512    0.822729    11.00000    0.08483    0.03410 =
         0.04254    0.00972    0.01327    0.00530
C210  1    0.643523    0.059098    0.840304    11.00000    0.07645    0.03930 =
         0.03313    0.00304    0.01115    0.00118
PART 1  21
S21   5    0.457418    0.300671    0.716891    21.00000    0.10657    0.03186 =
         0.06038    0.01268    0.03292    0.00911
PART 2 -21
S21A  5    0.442538    0.295464    0.685700   -21.00000    0.09012    0.02915 =
         0.06028    0.00939    0.01500    0.00594
PART 0
S22   5    0.670085    0.159994    0.777854    11.00000    0.09348    0.03825 =
         0.08506    0.02473    0.03490    0.00967
PART 1  31
O1D   4    0.343336    0.463551    0.826672    31.00000    0.09765    0.09510 =
         0.03874    0.00578    0.02237   -0.01327
C11D  1    0.456612    0.454957    0.859279    31.00000    0.10397    0.09905 =
         0.05419    0.01688    0.01937   -0.01352
AFIX  43
H11D  2    0.503377    0.469209    0.812745    31.00000   -1.20000
AFIX   0
N1D   3    0.505956    0.426390    0.957151    31.00000    0.12286    0.12665 =
         0.08077    0.02881    0.01509   -0.01436
C12D  1    0.628201    0.416017    0.998596    31.00000    0.12574    0.13281 =
         0.06889    0.03989    0.00849   -0.02079
AFIX 137
H12A  2    0.651288    0.410308    1.086748    31.00000   -1.50000
H12B  2    0.671337    0.445559    0.979705    31.00000   -1.50000
H12C  2    0.645837    0.385068    0.957766    31.00000   -1.50000
AFIX   0
C13D  1    0.437088    0.404624    1.027529    31.00000    0.13799    0.13394 =
         0.09924    0.03161    0.00384   -0.02068
AFIX 133
H13A  2    0.425193    0.367712    1.008854    31.00000   -1.50000
H13B  2    0.361382    0.422150    1.007973    31.00000   -1.50000
H13C  2    0.477243    0.409012    1.114251    31.00000   -1.50000
AFIX   0
PART 2 -31
O1B   4    0.375721    0.460691    0.820183   -31.00000    0.10071    0.09606 =
         0.05149    0.01367    0.02218   -0.02113
C11B  1    0.358789    0.415196    0.864032   -31.00000    0.11624    0.10555 =
         0.06600    0.02128    0.01206   -0.02057
AFIX  43
H11B  2    0.331422    0.387117    0.810046   -31.00000   -1.20000
AFIX   0
N1B   3    0.379654    0.408314    0.982895   -31.00000    0.13458    0.12542 =
         0.09183    0.03119    0.00455   -0.02238
C12B  1    0.362423    0.359277    1.031125   -31.00000    0.14588    0.13471 =
         0.09979    0.03410    0.00114   -0.02929
AFIX 137
H12D  2    0.333665    0.364139    1.102375   -31.00000   -1.50000
H12E  2    0.436537    0.340439    1.055128   -31.00000   -1.50000
H12F  2    0.305189    0.339453    0.969114   -31.00000   -1.50000
AFIX   0
C13B  1    0.421720    0.449369    1.066408   -31.00000    0.12908    0.12173 =
         0.08127    0.03352    0.01224   -0.01565
AFIX 137
H13D  2    0.393483    0.444780    1.138080   -31.00000   -1.50000
H13E  2    0.393484    0.482426    1.027274   -31.00000   -1.50000
H13F  2    0.507174    0.449184    1.091402   -31.00000   -1.50000
AFIX   0
PART 0
O2D   4    0.138845    0.429249    0.673423    11.00000    0.10957    0.06353 =
         0.09198   -0.00282    0.04279   -0.01996
C21D  1    0.045072    0.421701    0.616224    11.00000    0.14032    0.08358 =
         0.12837    0.00790    0.04279   -0.02192
AFIX  43
H21D  2    0.022421    0.435536    0.536151    11.00000   -1.20000
AFIX   0
N2D   3   -0.039205    0.394032    0.653195    11.00000    0.15133    0.09175 =
         0.17167    0.03152    0.03575   -0.02348
C22D  1   -0.155232    0.389917    0.577561    11.00000    0.16319    0.10026 =
         0.18561    0.03132   -0.00165    0.00522
AFIX 137
H22A  2   -0.174348    0.353443    0.558894    11.00000   -1.50000
H22B  2   -0.162873    0.408967    0.501783    11.00000   -1.50000
H22C  2   -0.208768    0.404492    0.619666    11.00000   -1.50000
AFIX   0
C23D  1   -0.015755    0.376081    0.774074    11.00000    0.17836    0.12330 =
         0.17653    0.00063    0.02203   -0.00335
AFIX 137
H23B  2   -0.085485    0.380245    0.801944    11.00000   -1.50000
H23C  2    0.048588    0.396079    0.826739    11.00000   -1.50000
H23D  2    0.005912    0.339457    0.777449    11.00000   -1.50000
AFIX   0
HKLF 4
 
 
 
 
REM  pz-2 in P2(1)/c; 100K; Xcalibur
REM wR2 = 0.2365, GooF = S = 1.044, Restrained GooF = 1.076 for all data
REM R1 = 0.0762 for 4702 Fo > 4sig(Fo) and 0.1170 for all 7481 data
REM 401 parameters refined using 319 restraints
 
END
 
WGHT      0.1484      0.0000
 
REM Highest difference peak  0.863,  deepest hole -0.875,  1-sigma level  0.101
Q1    1   0.0934  0.4108  0.7311  11.00000  0.05    0.86
Q2    1   0.6760  0.2917  0.7824  11.00000  0.05    0.86
Q3    1   0.4762  0.3877  0.9445  11.00000  0.05    0.84
Q4    1   0.6564  0.3417  0.7333  11.00000  0.05    0.83
Q5    1   0.4622  0.3385  0.9901  11.00000  0.05    0.76
;
_shelx_res_checksum              61115

_shelx_hkl_file                  
;
   0   0   1    1.92    4.09
   0   0  -1    5.95    3.80
   0   0   2 1544.00   76.26
   0   0  -2 1565.00   77.20
   0   0   3    3.78   11.17
   0   0  -3    1.15    9.47
   0   0   4 3247.00  159.60
   0   0  -4 3271.00  160.70
   0   0   5   -1.68    9.15
   0   0  -5    1.06    7.92
   0   0   6 1569.00   78.66
   0   0  -6 1674.00   83.30
   0   0   8 1130.00   57.33
   0   0  -8 1086.00   55.26
   0   0  10   99.35   11.09
   0   0 -10  111.00   12.24
   0   0  11   14.58    9.28
   0   0 -11    9.04    9.45
   0   0  12    4.61    9.64
   0   0 -12    3.99    9.52
   0   0  13   -9.55    9.28
   0   0 -13   14.74    8.54
   0   0  14   86.30    9.99
   0   0 -14   70.97    8.87
   0  -1   2  684.30   34.79
   0  -1  -2  805.70   40.65
   0   1   2  749.00   38.01
   0   1  -2  676.90   34.56
   0  -1   3 5264.00  257.70
   0  -1  -3 5553.00  271.70
   0   1   3 5113.00  250.40
   0   1  -3 5346.00  261.70
   0  -1   4  243.70   15.89
   0  -1  -4  281.30   17.24
   0   1   4  255.80   17.22
   0   1  -4  276.10   17.24
   0  -1   5   49.93    9.62
   0  -1  -5   52.42    9.10
   0   1   5   40.45   10.06
   0   1  -5   34.82    8.99
   0  -1   7  563.80   30.34
   0  -1  -7  513.60   27.93
   0   1   7  502.30   27.45
   0   1  -7  609.50   32.79
   0  -1   9  411.00   23.55
   0  -1  -9  397.80   23.99
   0   1   9  368.60   21.96
   0   1  -9  393.60   22.97
   0  -1  10   48.50    9.49
   0  -1 -10   18.34   10.88
   0   1  10   29.02    9.90
   0   1 -10   44.46    9.82
   0  -1  11    4.86    9.12
   0  -1 -11   -7.26    9.32
   0   1  11   10.76    9.82
   0   1 -11  -14.11    9.05
   0  -1  12   -4.30    8.80
   0  -1 -12    7.36    9.73
   0   1  12    9.88   10.36
   0   1 -12  -10.02    8.17
   0  -1  13   19.45    9.07
   0  -1 -13   22.30    9.26
   0   1  13    4.78   10.04
   0   1 -13    8.90    8.70
   0  -1  14   28.20    8.17
   0  -1 -14    9.34    7.59
   0   1  14   25.40    8.80
   0   1 -14    8.97    7.30
   0  -2   1  233.60   13.08
   0  -2  -1  241.90   13.17
   0   2   1  219.20   12.53
   0   2  -1  199.80   11.49
   0  -2   2 1196.00   59.67
   0  -2  -2 1115.00   55.60
   0   2   2 1023.00   51.35
   0   2  -2  923.40   46.31
   0  -2   3 1706.00   85.00
   0  -2  -3 1566.00   78.39
   0   2   3 1343.00   67.58
   0   2  -3 1390.00   69.72
   0  -2   4 4000.00  196.20
   0  -2  -4 3892.00  191.00
   0   2   4 3631.00  178.20
   0   2  -4 4214.00  206.70
   0  -2   5  304.50   18.27
   0  -2  -5  293.60   18.06
   0   2   5  327.60   20.35
   0   2  -5  327.80   19.76
   0  -2   6 2177.00  108.00
   0  -2  -6 1888.00   93.76
   0   2   6 1839.00   91.63
   0   2  -6 2198.00  108.90
   0   2   7    9.83    8.83
   0   2  -7   26.10    8.86
   0  -2   8 1325.00   66.60
   0  -2  -8 1207.00   61.04
   0   2   8 1122.00   56.95
   0   2  -8 1299.00   65.34
   0  -2  10  249.80   15.93
   0  -2 -10  192.30   16.08
   0   2  10  198.50   15.50
   0   2 -10  214.90   15.08
   0  -2  11   -5.61    8.62
   0  -2 -11   -6.44   10.41
   0   2  11    2.85   10.30
   0   2 -11   -5.21    8.04
   0  -2  12    7.72    8.56
   0  -2 -12    3.54    9.78
   0   2  12    8.93   11.15
   0   2 -12   -0.93    8.74
   0  -2  13   15.73    8.88
   0  -2 -13   17.56    9.78
   0   2  13   15.90   10.49
   0   2 -13    6.13    8.13
   0  -2  14   56.55    7.82
   0  -2 -14   60.42    9.00
   0   2  14   66.65    9.88
   0   2 -14   66.20    8.14
   0  -3   0   10.24    5.52
   0   3   0   -3.35    6.62
   0  -3   1  827.60   41.39
   0  -3   1  832.10   41.71
   0  -3  -1  894.30   44.68
   0   3   1  814.80   40.95
   0   3  -1  809.40   40.60
   0  -3   2  394.00   21.84
   0  -3  -2  388.90   21.80
   0   3   2  377.70   21.50
   0   3  -2  357.80   20.10
   0  -3   3 3310.00  162.90
   0  -3  -3 2916.00  143.70
   0   3   3 2858.00  141.00
   0   3  -3 2884.00  142.10
   0  -3   4  792.60   40.68
   0  -3  -4  844.50   43.41
   0   3   4  798.20   41.22
   0   3  -4  789.40   40.66
   0  -3   5   70.52    9.26
   0  -3  -5   72.02   10.43
   0   3   5   85.54   11.43
   0   3  -5   69.41    9.38
   0  -3   6  707.70   37.23
   0  -3  -6  621.70   33.11
   0   3   6  591.70   31.94
   0   3  -6  665.20   34.83
   0  -3   7 1347.00   67.67
   0  -3  -7 1183.00   59.91
   0   3   7 1193.00   60.29
   0   3  -7 1318.00   66.28
   0   3   8    6.82    9.56
   0   3  -8   -1.80    7.94
   0  -3   9  124.60   11.58
   0  -3  -9  109.40   11.79
   0   3   9  114.00   12.88
   0   3  -9   94.90   10.24
   0   3  10    4.09   10.57
   0   3 -10   19.57    7.90
   0  -3  11    8.28    8.95
   0  -3 -11   18.16   10.08
   0   3  11   22.98   11.47
   0   3 -11    0.71    8.30
   0  -3  12   37.51    8.94
   0  -3 -12   27.88   10.32
   0   3  12   62.90   11.89
   0   3 -12   30.94    9.13
   0  -3  13   10.29    8.66
   0  -3 -13   -0.62    9.78
   0   3  13   17.66   11.23
   0   3 -13    4.16    8.03
   0  -3  14   39.91    8.38
   0  -3 -14   15.58    8.66
   0   3  14    3.02    7.99
   0   3 -14   12.38    7.10
   0   4   0 5645.00  275.50
   0  -4   1 1093.00   54.50
   0  -4   1 1153.00   57.45
   0  -4  -1 1087.00   54.18
   0   4   1  989.60   49.70
   0   4  -1  952.90   47.74
   0  -4   2   18.59   10.44
   0  -4  -2   15.08    9.70
   0   4   2   16.64   11.34
   0   4  -2   -0.18    9.78
   0  -4   3  387.40   22.76
   0  -4  -3  337.30   20.77
   0   4   3  329.50   20.39
   0   4  -3  340.60   20.75
   0  -4   4  618.30   32.65
   0  -4  -4  576.10   31.09
   0   4   4  592.60   31.87
   0   4  -4  562.60   29.88
   0  -4   5   72.04    8.87
   0  -4  -5   76.27   10.77
   0   4   5   73.59   11.30
   0   4  -5   64.84    9.31
   0  -4   6  855.80   44.22
   0  -4  -6  747.00   39.07
   0   4   6  765.10   40.23
   0   4  -6  760.30   39.34
   0  -4   7   -1.92    8.64
   0  -4  -7    8.71    9.64
   0   4   7    7.97   10.06
   0   4  -7   10.66    8.07
   0   4   8  765.30   40.31
   0   4  -8  829.10   42.74
   0  -4   9   10.97    8.49
   0  -4  -9   28.45   10.61
   0   4   9   -2.06   11.18
   0   4  -9   34.25    8.86
   0  -4  10   61.32    9.37
   0  -4 -10   62.02   10.89
   0   4  10   49.18   11.66
   0   4 -10   57.99    9.68
   0  -4  11   28.00    8.58
   0  -4 -11   30.06   10.71
   0   4  11   29.86   11.38
   0   4 -11   23.25    8.55
   0  -4  12    5.17    8.10
   0  -4 -12   -5.56   10.93
   0   4  12  -14.64   10.83
   0   4 -12    1.39    8.33
   0  -4  13   14.37    8.93
   0  -4 -13   10.05   10.33
   0   4  13    2.11    9.96
   0   4 -13    4.48    8.01
   0  -4  14   67.34    8.53
   0  -4 -14   44.86    9.39
   0   4  14   84.23    9.55
   0   4 -14   57.50    7.80
   0  -5   0   -4.82    9.23
   0   5   0   -8.06    9.26
   0  -5   1  400.00   22.86
   0  -5   1  443.20   25.09
   0  -5  -1  395.70   22.39
   0   5   1  402.80   23.10
   0   5  -1  379.40   22.08
   0  -5   2  153.30   13.70
   0  -5  -2  151.50   13.11
   0  -5   3  562.60   30.27
   0  -5  -3  557.30   30.20
   0   5   3  477.80   26.67
   0   5  -3  501.30   27.45
   0  -5   4  213.60   15.16
   0  -5  -4  168.70   13.34
   0   5   4  156.60   12.99
   0   5  -4  165.50   12.78
   0  -5   5 1277.00   64.02
   0  -5  -5 1240.00   62.50
   0   5   5 1174.00   59.61
   0   5  -5 1236.00   62.28
   0  -5   6    8.03    8.22
   0  -5  -6   -8.83    9.44
   0   5   6   11.87   10.56
   0   5  -6    2.55    8.80
   0  -5   7   34.45    8.98
   0  -5  -7   37.66   10.19
   0   5   7   34.38   10.66
   0   5  -7   38.81    9.28
   0  -5   8   -7.39    9.07
   0  -5  -8    4.99    9.90
   0   5   8    0.47    9.82
   0   5  -8    0.08    8.40
   0  -5   9  616.70   32.98
   0  -5  -9  538.50   30.21
   0   5   9  588.80   32.85
   0   5  -9  570.80   30.81
   0  -5  10    0.00    7.97
   0  -5 -10   -9.09   10.52
   0   5  10   22.89   11.06
   0   5 -10   14.08    8.18
   0  -5  11  -17.69    8.09
   0  -5 -11    5.46    9.67
   0   5  11    8.18   10.06
   0   5 -11   12.95    8.66
   0  -5  12   77.61    9.66
   0  -5 -12   65.90   11.46
   0   5  12   89.87   12.30
   0   5 -12   86.43    9.60
   0  -5  13    3.07    8.24
   0  -5 -13   -7.82   10.19
   0   5  13   -3.75    9.44
   0   5 -13   -3.08    7.67
   0  -5  14    2.00    6.93
   0  -5 -14   -8.76    8.52
   0   5  14   -2.63    8.01
   0   5 -14    6.21    6.59
   0  -6   0 4476.00  219.20
   0   6   0 4747.00  232.40
   0  -6   1   42.86   11.76
   0  -6  -1   23.03   11.94
   0   6   1   38.32   12.94
   0   6  -1   46.69   12.73
   0  -6   2  106.60   12.08
   0  -6   2   93.45   12.58
   0  -6  -2   91.76   12.96
   0   6   2   75.79   12.36
   0   6  -2   64.60   11.92
   0  -6   3  196.90   14.08
   0  -6  -3  201.60   14.85
   0   6   3  205.30   15.36
   0   6  -3  189.90   14.50
   0  -6   4  173.90   13.36
   0  -6  -4  185.60   14.80
   0   6   4  162.90   13.51
   0   6  -4  173.10   12.97
   0  -6   5  498.50   27.32
   0  -6  -5  451.40   25.55
   0   6   5  410.00   23.73
   0   6  -5  437.00   24.55
   0  -6   6   76.26    9.19
   0  -6  -6   79.02   11.06
   0   6   6   66.84   10.47
   0   6  -6   64.05   10.22
   0  -6   7  204.60   14.68
   0  -6  -7  181.90   14.38
   0   6   7  164.40   14.44
   0   6  -7  197.20   14.61
   0   6   8  714.60   38.21
   0   6  -8  765.30   39.89
   0  -6   9    0.57    8.68
   0  -6  -9    8.60   10.44
   0   6   9    7.32   10.67
   0   6  -9   -6.00    8.91
   0  -6  10   -6.54    8.20
   0  -6 -10   -8.93   10.85
   0   6  10  -20.04   10.28
   0   6 -10    1.67    8.17
   0  -6  11   48.11    8.82
   0  -6 -11   22.94   10.27
   0   6  11   30.58   10.59
   0   6 -11   42.72    8.50
   0  -6  12   14.92    8.28
   0  -6 -12   -7.93    9.68
   0   6  12    5.05   10.06
   0   6 -12   -2.09    7.62
   0  -6  13  -10.36    7.66
   0  -6 -13    0.00   10.57
   0   6  13   13.00    8.92
   0   6 -13   13.97    7.72
   0  -6  14   50.24    8.27
   0  -6 -14   27.67    9.98
   0  -7   0   14.16   10.90
   0   7   0   -0.28   12.39
   0  -7   1    7.01   11.86
   0  -7  -1  -10.90   10.81
   0   7   1    5.40   13.31
   0   7  -1    3.28   12.28
   0  -7   2  100.70   11.95
   0  -7   2  119.00   12.38
   0  -7  -2  117.30   12.89
   0   7   2  125.10   12.89
   0  -7   3 1476.00   73.80
   0  -7  -3 1290.00   64.72
   0   7   3 1266.00   63.57
   0   7  -3 1381.00   69.34
   0  -7   4    2.24    8.61
   0  -7  -4    3.28    9.97
   0   7   4   19.88   11.03
   0   7  -4   14.84    9.23
   0  -7   5  174.70   13.88
   0  -7  -5  138.30   12.86
   0   7   5  113.30   12.31
   0   7  -5  115.90   11.14
   0  -7   6  161.90   12.01
   0  -7  -6  149.50   13.58
   0   7   6  148.70   12.54
   0   7  -6  160.30   12.95
   0  -7   7  215.20   14.45
   0  -7  -7  181.30   14.43
   0   7   7  190.00   15.55
   0   7  -7  242.10   16.56
   0  -7   8  233.90   16.07
   0  -7  -8  185.20   14.94
   0   7   8  212.30   16.64
   0   7  -8  213.90   14.95
   0  -7   9  301.70   18.48
   0  -7  -9  286.60   19.16
   0   7   9  286.30   19.48
   0   7  -9  282.20   17.49
   0   7  10   19.86   10.62
   0   7 -10   18.36    8.47
   0  -7  11   16.34    8.31
   0  -7 -11   15.56   10.37
   0   7  11    7.12    9.44
   0   7 -11   20.07    8.22
   0  -7  12   96.92   10.49
   0  -7 -12   99.31   12.09
   0   7  12  100.30   11.41
   0   7 -12   89.31    9.69
   0  -7  13  -10.92    7.84
   0  -7 -13   11.95   10.19
   0   7  13    0.32    8.27
   0   7 -13   -1.01    8.05
   0  -7  14    7.88    6.86
   0  -7 -14   -7.52    8.90
   0   7  14    1.48    7.89
   0   7 -14   -6.16    5.87
   0  -8   0  968.10   49.84
   0   8   0  969.80   50.31
   0  -8   1 3147.00  155.00
   0  -8  -1 3204.00  157.60
   0   8   1 3064.00  150.90
   0   8  -1 3160.00  155.80
   0  -8   2  507.80   28.01
   0  -8   2  535.20   29.21
   0  -8  -2  514.20   27.90
   0   8   2  418.90   24.00
   0  -8   3   47.99    9.61
   0  -8   3   33.34    9.13
   0  -8  -3   24.92    8.90
   0   8   3   45.05   11.03
   0   8  -3   54.77    9.12
   0  -8   4   38.31    9.17
   0  -8  -4   47.22   10.17
   0   8   4   48.89    9.66
   0   8  -4   50.79   10.25
   0  -8   5  784.90   40.80
   0  -8  -5  754.40   39.59
   0   8   5  781.20   41.06
   0   8  -5  800.40   41.60
   0  -8   6  207.90   14.42
   0  -8  -6  215.40   15.82
   0   8   6  221.90   16.18
   0   8  -6  193.90   14.05
   0  -8   7  157.70   12.65
   0  -8  -7  156.10   13.70
   0   8   7  142.90   13.26
   0   8  -7  178.70   13.72
   0  -8   8  510.20   28.17
   0  -8  -8  488.60   27.57
   0   8   8  492.30   27.81
   0   8  -8  539.10   29.35
   0  -8   9   28.46    8.69
   0  -8  -9   19.20   11.08
   0   8   9   35.85   11.31
   0   8  -9   30.58    9.11
   0  -8  10   -9.65    7.75
   0  -8 -10   -4.45   10.60
   0   8  10    4.30    9.81
   0   8 -10    9.77    8.87
   0  -8  11   69.23    9.79
   0  -8 -11   72.79   11.93
   0   8  11   81.88   11.07
   0   8 -11   99.71   10.76
   0  -8  12    8.98    8.32
   0  -8 -12   -6.51    9.79
   0   8  12    4.13    9.79
   0   8 -12    2.99    7.48
   0  -8  13   -5.26    7.21
   0  -8 -13   -1.74    9.46
   0   8  13   18.82    8.96
   0   8 -13   -0.02    7.23
   0  -8  14   16.58    6.28
   0  -8 -14   -2.46    9.18
   0   8  14    8.41    7.81
   0   8 -14    7.24    5.91
   0  -9   0    2.40   10.20
   0   9   0    1.88   10.19
   0  -9   1   97.08   11.62
   0  -9  -1   97.98   11.45
   0   9   1   97.26   13.08
   0   9  -1  105.70   12.57
   0  -9   2  272.80   17.49
   0  -9   2  274.80   17.74
   0  -9  -2  252.90   16.45
   0   9   2  274.30   18.29
   0  -9   3 1013.00   51.54
   0  -9   3 1027.00   52.35
   0  -9  -3 1014.00   51.54
   0   9   3 1054.00   53.89
   0  -9   4   19.83    9.00
   0  -9   4   18.48    9.56
   0  -9  -4    6.03    9.96
   0   9   4    5.32   10.17
   0   9  -4    7.85   10.03
   0  -9   5   65.50    9.44
   0  -9  -5   52.15   10.32
   0   9   5   64.73   10.48
   0   9  -5   71.97   10.63
   0  -9   6  441.90   24.71
   0  -9  -6  426.20   24.66
   0   9   6  409.20   24.17
   0   9  -6  414.30   23.92
   0  -9   7   24.30    8.14
   0  -9  -7   36.20   10.58
   0   9   7   36.63   12.04
   0   9  -7   28.81    9.17
   0  -9   8  307.50   18.83
   0  -9  -8  295.40   19.40
   0   9   8  313.20   21.19
   0   9  -8  301.70   18.38
   0  -9   9  223.00   15.33
   0  -9  -9  173.30   14.94
   0   9   9  178.80   15.29
   0   9  -9  190.90   13.61
   0  -9  10  -10.67    8.16
   0  -9 -10   -9.07   10.46
   0   9  10  -16.62    9.64
   0   9 -10   -8.71    7.71
   0  -9  11  160.00   12.62
   0  -9 -11  160.00   14.72
   0   9  11  123.20   12.62
   0   9 -11  155.60   12.03
   0  -9  12   67.67    9.02
   0  -9 -12   84.02   11.63
   0   9  12   69.63   10.06
   0   9 -12   72.95    8.81
   0  -9  13    9.50    7.83
   0  -9 -13   14.13    9.76
   0   9  13   -1.46    9.62
   0   9 -13    7.30    7.31
   0  -9  14   -6.63    6.44
   0  -9 -14   -3.83    9.61
   0   9  14    1.68    8.06
   0   9 -14   -0.07    5.72
   0 -10   0  710.50   37.37
   0  10   0  692.20   36.68
   0 -10   1    5.11   10.93
   0 -10  -1   10.06    9.57
   0  10   1  -11.39   11.17
   0  10  -1   -0.62   10.30
   0 -10   2  464.20   25.98
   0 -10   2  431.10   24.20
   0 -10  -2  464.80   25.83
   0  10   2  441.80   25.41
   0 -10   3  459.10   25.88
   0 -10   3  405.90   23.34
   0 -10  -3  422.70   24.06
   0  10   3  389.20   23.12
   0 -10   4   56.02    9.74
   0 -10   4   80.52   10.63
   0 -10  -4   84.28   10.81
   0  10   4   82.56   11.91
   0  10  -4   63.54    9.46
   0 -10   5  172.40   13.01
   0 -10   5  174.90   12.85
   0 -10  -5  175.10   13.90
   0  10   5  169.60   14.39
   0  10  -5  217.80   16.02
   0 -10   6   -1.61    9.51
   0 -10  -6    6.17    9.68
   0  10   6    3.05   10.15
   0  10  -6   22.24    9.76
   0 -10   7   45.02    9.35
   0 -10  -7   55.96   11.32
   0  10   7   25.85   11.55
   0  10  -7   45.33    9.71
   0 -10   8  155.00   12.20
   0 -10  -8  165.20   14.84
   0  10   8  151.10   16.21
   0  10  -8  167.80   13.14
   0 -10   9   16.29    8.84
   0 -10  -9    1.89   10.66
   0  10   9   -9.75   11.11
   0  10  -9    0.98    8.20
   0 -10  10   98.08   10.67
   0 -10 -10   87.92   12.56
   0  10  10   89.21   11.83
   0  10 -10   97.46   10.04
   0  10  11   21.78   10.54
   0  10 -11   21.47    7.97
   0 -10  12    0.34    7.43
   0 -10 -12   -5.46   10.60
   0  10  12    3.67   10.20
   0  10 -12   -3.78    7.33
   0 -10  13   11.57    7.25
   0 -10 -13    4.20    9.83
   0  10  13   14.06    9.13
   0  10 -13   22.52    7.46
   0 -10  14   22.09    7.12
   0 -10 -14   38.37    9.16
   0  10  14    1.47    7.75
   0  10 -14   17.59    6.03
   0 -11   0   -1.71   10.07
   0  11   0    0.57   10.76
   0 -11   1    7.28   10.41
   0 -11  -1   36.45   10.21
   0  11   1   33.51   11.60
   0  11  -1   10.78   10.07
   0 -11   2   75.25   11.57
   0 -11   2   37.29    9.35
   0 -11  -2   56.25   10.60
   0  11   2   46.62   11.66
   0  11  -2   34.74    9.68
   0 -11   3  751.00   39.48
   0 -11   3  716.40   37.84
   0 -11  -3  666.80   35.47
   0  11   3  659.70   35.32
   0 -11   4  378.70   22.47
   0 -11   4  348.70   20.72
   0 -11  -4  389.40   22.43
   0  11   4  367.50   22.17
   0 -11   5  193.80   13.96
   0 -11   5  209.40   15.13
   0 -11  -5  173.20   14.13
   0  11   5  189.50   15.15
   0  11  -5  200.30   15.12
   0 -11   6   33.54    9.05
   0 -11   6   38.68    9.12
   0 -11  -6   27.32   10.40
   0 -11   7  162.10   13.50
   0 -11  -7  126.60   13.50
   0  11   7  154.10   12.91
   0  11  -7  131.50   12.14
   0 -11   8   11.91    8.15
   0 -11  -8    8.67   11.28
   0  11   8   16.04   10.61
   0  11  -8   34.69    9.66
   0 -11   9  251.00   16.08
   0 -11  -9  219.10   16.83
   0  11   9  219.30   15.77
   0  11  -9  222.40   15.11
   0 -11  10   11.51    8.38
   0 -11 -10   24.81   10.96
   0  11  10   13.24   10.19
   0  11 -10   18.21    8.47
   0 -11  11  118.60   10.17
   0 -11 -11  114.80   12.98
   0  11  11  146.10   13.53
   0  11 -11  133.90   11.24
   0 -11  12   92.82    9.44
   0 -11 -12   83.53   12.31
   0  11  12   91.62   11.74
   0  11 -12   87.86    9.06
   0 -11  13   -2.22    7.00
   0 -11 -13  -15.31    9.84
   0  11  13  -10.52    8.92
   0  11 -13   16.23    7.24
   0 -11  14    4.16    5.89
   0 -11 -14   18.14    8.99
   0  11  14   -5.77    7.94
   0  11 -14    3.41    5.71
   0 -12   0  298.30   19.38
   0  12   0  265.40   18.34
   0 -12   1    2.24   11.24
   0 -12  -1    5.57   10.02
   0  12   1   18.46   11.29
   0  12  -1    4.90   10.19
   0 -12   2  889.40   46.25
   0 -12   2  814.60   42.43
   0 -12  -2  817.90   42.46
   0  12   2  785.80   41.31
   0  12  -2  825.40   43.01
   0 -12   3   14.51    9.00
   0 -12   3   -4.91    9.50
   0 -12  -3    9.65   11.26
   0  12   3   20.93   10.84
   0 -12   4  331.40   19.98
   0 -12   4  388.50   22.79
   0 -12  -4  306.50   19.07
   0  12   4  317.60   20.04
   0 -12   5   93.96   10.68
   0 -12   5  107.30   11.52
   0 -12  -5   77.11   11.28
   0  12   5  101.20   13.48
   0  12  -5   93.39   11.20
   0 -12   6   14.52    8.90
   0 -12   6   22.56    9.46
   0 -12  -6   21.90   10.02
   0  12   6    5.56   11.40
   0  12  -6   14.25    9.82
   0 -12   7   20.90    7.93
   0 -12   7    6.08    8.16
   0 -12  -7   14.07   10.87
   0  12   7   18.84   11.86
   0  12  -7    1.00    9.47
   0 -12   8  129.90   11.01
   0 -12  -8  107.80   13.16
   0  12   8  129.00   12.65
   0  12  -8  107.20   11.45
   0 -12   9  -12.11    8.05
   0 -12  -9   -5.07   10.87
   0  12   9    1.49    8.61
   0  12  -9   -7.05    8.23
   0 -12  10   43.27    8.67
   0 -12 -10   49.36   11.77
   0  12  10   47.28    9.90
   0  12 -10   29.57    8.85
   0 -12  11   11.81    7.46
   0 -12 -11   17.92   10.79
   0 -12  12   18.93    7.48
   0 -12 -12   31.21   10.82
   0  12  12   13.87    9.54
   0  12 -12    8.58    7.32
   0 -12  13    6.35    6.61
   0 -12 -13   20.01    9.68
   0  12  13    3.70    7.78
   0  12 -13    5.77    6.94
   0 -13   0    2.37   10.05
   0  13   0   -5.25   11.18
   0 -13   2  242.40   16.69
   0 -13   2  255.40   17.27
   0 -13  -2  245.00   16.52
   0  13   2  221.10   17.04
   0  13  -2  258.40   17.86
   0 -13   3 1197.00   60.67
   0 -13   3 1147.00   58.51
   0 -13  -3 1175.00   59.65
   0  13   3 1115.00   56.63
   0 -13   4   41.27    9.67
   0 -13   4   29.10   10.33
   0 -13  -4   16.96    9.79
   0  13   4   20.45   11.07
   0 -13   5  173.80   14.13
   0 -13   5  167.00   13.18
   0 -13  -5  137.10   13.20
   0  13   5  152.40   14.71
   0 -13   6  402.40   23.38
   0 -13   6  420.20   23.80
   0 -13  -6  426.40   24.84
   0  13   6  406.80   24.54
   0  13  -6  403.00   23.06
   0 -13   7  121.50   11.43
   0 -13   7  129.70   11.39
   0 -13  -7  109.20   13.10
   0  13   7  108.50   14.30
   0  13  -7  139.80   12.28
   0 -13   8  141.50   11.35
   0 -13   8  148.50   12.38
   0 -13  -8  153.20   14.15
   0  13   8  155.70   13.61
   0  13  -8  156.50   12.87
   0 -13   9   50.02    7.92
   0 -13   9   60.51    9.07
   0 -13  -9   83.18   12.42
   0  13   9   49.69   10.11
   0  13  -9   67.23    9.67
   0 -13  10    4.30    7.40
   0 -13 -10   19.22   11.26
   0  13  10    1.05    9.52
   0  13 -10    9.26    8.38
   0 -13  11  134.10   10.82
   0 -13 -11  143.20   13.89
   0  13  11  126.80   11.61
   0  13 -11  159.20   11.96
   0 -13  12   32.79    7.60
   0 -13 -12   45.56   10.81
   0  13  12   26.66    8.71
   0  13 -12   46.68    7.95
   0 -13  13   -0.40    5.97
   0 -13  13   10.22    6.91
   0 -13 -13   -8.94    8.99
   0  13  13   11.44    8.13
   0  13 -13    8.00    6.41
   0 -14   0  190.20   14.90
   0  14   0  157.00   14.84
   0 -14   1  218.30   15.80
   0 -14  -1  239.80   16.73
   0  14   1  261.20   18.42
   0  14  -1  212.60   16.58
   0 -14   2  363.90   21.74
   0 -14   2  406.30   23.81
   0 -14  -2  391.80   23.27
   0  14   2  388.40   23.42
   0  14  -2  363.10   21.89
   0 -14   3   96.82   11.87
   0 -14   3  128.20   12.27
   0 -14  -3  123.50   11.80
   0  14   3  112.80   12.48
   0 -14   4  823.30   43.09
   0 -14   4  864.10   44.94
   0 -14  -4  797.90   41.71
   0  14   4  897.00   47.04
   0 -14   5  410.90   23.83
   0 -14   5  380.30   22.41
   0 -14  -5  410.80   23.71
   0  14   5  346.00   21.93
   0 -14   6   11.71    8.06
   0 -14   6    1.41    8.44
   0 -14  -6   -9.27   11.27
   0  14   6   11.48   11.10
   0 -14   7   73.76    9.74
   0 -14   7   73.08    9.56
   0 -14  -7   61.81   11.40
   0  14   7   83.19   13.26
   0  14  -7   70.85    9.54
   0 -14   8    4.62    8.22
   0 -14   8    2.71    7.68
   0 -14  -8   12.99   10.19
   0  14   8  -15.21    9.92
   0  14  -8    2.09    8.51
   0 -14   9   -4.14    7.26
   0 -14   9   -1.82    7.11
   0 -14  -9   -1.80   10.48
   0  14   9   14.35   10.66
   0  14  -9    7.09    8.35
   0 -14  10   46.26    8.20
   0 -14  10   23.49    7.63
   0 -14 -10   51.86   11.67
   0 -14  11   51.49    8.29
   0 -14  11   36.11    8.28
   0 -14 -11   45.48   11.21
   0  14  11   57.78   10.90
   0  14 -11   57.47    8.53
   0 -14  12   34.09    6.80
   0 -14  12   39.03    7.15
   0 -14 -12   58.12   11.11
   0  14  12   48.74   10.44
   0  14 -12   48.32    7.89
   0 -14  13   -1.71    6.39
   0 -14  13    9.05    6.05
   0 -14 -13  -13.06    8.48
   0  14  13   -0.39    8.03
   0  14 -13    6.15    5.72
   0 -15   0   -7.47   10.14
   0  15   0  -11.79   10.20
   0 -15   1  199.40   14.90
   0 -15  -1  187.60   14.68
   0  15   1  214.00   15.83
   0  15  -1  215.00   15.96
   0 -15   2   94.96   11.96
   0 -15   2  112.10   13.14
   0 -15  -2   96.92   11.92
   0  15   2   87.09   11.57
   0  15  -2   72.83   10.96
   0 -15   3 1119.00   56.91
   0 -15   3 1326.00   67.37
   0 -15  -3 1121.00   57.17
   0  15   3 1194.00   60.83
   0 -15   4  251.70   17.03
   0 -15   4  229.00   15.62
   0 -15  -4  226.70   15.68
   0  15   4  247.20   18.22
   0 -15   5  579.80   31.21
   0 -15  -5  646.30   34.73
   0  15   5  609.70   33.65
   0 -15   6   -1.64    8.35
   0 -15   6  -12.85    7.88
   0 -15  -6  -10.05   10.93
   0  15   6   -3.30   10.03
   0 -15   7  177.20   13.65
   0 -15   7  165.60   12.95
   0 -15  -7  179.60   14.53
   0  15   7  153.20   14.14
   0 -15   8  169.10   12.65
   0 -15   8  159.20   12.42
   0 -15  -8  151.70   14.00
   0  15   8  155.90   13.62
   0  15  -8  160.10   12.53
   0 -15   9   -2.08    7.28
   0 -15   9   -4.47    7.48
   0 -15  -9   -7.76   10.61
   0  15   9   -3.17    9.86
   0  15  -9   14.28    8.02
   0 -15  10   97.31    9.49
   0 -15  10  111.80    9.87
   0 -15 -10  100.80   13.62
   0  15  10   75.71   11.12
   0  15 -10   99.87    9.64
   0 -15  11  264.40   15.61
   0 -15  11  292.00   17.73
   0 -15 -11  261.00   18.20
   0  15  11  261.00   17.51
   0  15 -11  269.60   16.11
   0 -15  12    4.57    6.31
   0 -15  12    9.15    6.56
   0 -15 -12    8.19   11.26
   0  15  12    9.81    9.13
   0  15 -12   -4.65    6.90
   0 -15  13   -0.98    5.76
   0 -15  13    6.51    4.92
   0 -15 -13   -1.65    9.25
   0  15  13    6.03    8.49
   0  15 -13   10.96    5.48
   0 -16   0  167.70   14.24
   0  16   0  186.80   14.40
   0 -16   1   15.54   10.17
   0 -16  -1   30.01   10.26
   0  16   1   11.06   10.45
   0  16  -1   21.51   10.50
   0 -16   2  291.50   20.17
   0 -16   2  262.40   17.70
   0 -16  -2  264.00   17.83
   0  16   2  267.50   19.17
   0  16  -2  249.20   17.40
   0 -16   3  395.00   23.29
   0 -16   3  364.70   21.69
   0 -16  -3  334.50   20.33
   0  16   3  360.60   22.76
   0 -16   4  442.90   25.37
   0 -16   4  453.40   25.93
   0 -16  -4  414.90   24.22
   0  16   4  429.10   25.64
   0 -16   5   54.77   10.58
   0 -16   5   62.17    9.11
   0 -16  -5   65.40   11.34
   0  16   5   84.25   12.80
   0 -16   6   30.14    8.33
   0 -16   6   38.25    9.27
   0 -16  -6   17.07   10.82
   0  16   6   41.17   11.32
   0 -16   7  202.10   14.46
   0 -16   7  168.10   13.13
   0 -16  -7  185.00   15.39
   0  16   7  208.10   16.00
   0 -16   8   81.76   10.21
   0 -16   8   97.35    9.90
   0 -16  -8  111.10   12.70
   0  16   8  124.30   13.06
   0 -16   9  264.70   16.38
   0 -16   9  250.70   15.67
   0 -16  -9  247.70   17.91
   0  16   9  243.90   17.59
   0 -16  10   74.06    9.07
   0 -16  10   73.59    8.87
   0 -16 -10   82.16   12.03
   0  16  10   64.64   11.77
   0  16 -10   61.28    8.21
   0 -16  11    6.88    6.77
   0 -16  11    6.73    7.58
   0 -16 -11   13.50   10.50
   0  16  11    5.38   10.03
   0  16 -11   11.89    6.71
   0 -16  12   44.74    7.69
   0 -16  12   41.54    6.91
   0 -16 -12   37.37   11.17
   0  16  12   45.79    9.46
   0  16 -12   61.48    7.90
   0 -16  13   -3.18    4.97
   0 -16  13    9.50    5.59
   0 -16 -13    4.86    8.74
   0  16  13    6.12    8.28
   0  16 -13   11.09    5.60
   0 -17   0   -5.47    9.86
   0  17   0   -0.31    9.91
   0 -17   1  161.60   13.91
   0 -17  -1  120.70   11.37
   0  17   1  118.10   13.89
   0  17  -1  136.30   14.03
   0 -17   2   13.95   10.13
   0 -17   2    5.08   10.12
   0 -17  -2   15.17    9.81
   0  17   2   -1.34   12.93
   0  17  -2   -3.41   10.09
   0 -17   3  858.90   44.65
   0 -17   3  824.40   42.86
   0 -17  -3  850.00   44.00
   0  17   3  835.20   44.13
   0 -17   4   79.93   11.43
   0 -17   4   52.58   10.04
   0 -17  -4   81.92   12.75
   0  17   4   57.40   11.90
   0 -17   5  250.30   16.90
   0 -17   5  258.00   16.84
   0 -17  -5  235.00   16.92
   0  17   5  246.50   18.32
   0 -17   6  329.40   19.90
   0 -17   6  327.60   19.45
   0 -17  -6  320.70   20.76
   0  17   6  368.20   22.78
   0 -17   7   27.31    8.89
   0 -17   7   29.24    8.40
   0 -17  -7   24.52   10.91
   0  17   7   13.94    9.62
   0 -17   8   13.98    7.74
   0 -17   8   35.62    9.01
   0 -17  -8   21.16   10.28
   0  17   8   35.96   10.21
   0 -17   9   11.77    7.79
   0 -17   9    5.09    8.06
   0 -17  -9   -9.50   10.39
   0  17   9  -17.31   10.98
   0 -17  10   19.58    7.35
   0 -17  10    4.68    7.38
   0 -17 -10   12.66   10.92
   0  17  10   13.87   10.22
   0 -17  11  215.10   13.44
   0 -17  11  244.10   15.17
   0 -17 -11  249.10   17.49
   0  17  11  258.40   17.12
   0 -17  12   13.08    6.16
   0 -17  12   10.59    6.39
   0 -17 -12   -1.41    9.42
   0  17  12    0.53    9.00
   0 -18   0   94.99   11.90
   0  18   0  115.90   12.11
   0 -18   1  415.10   24.11
   0 -18  -1  443.00   25.23
   0  18   1  419.10   24.73
   0  18  -1  407.40   23.99
   0 -18   2  106.30   12.08
   0 -18   2   96.72   11.97
   0 -18  -2  114.10   12.38
   0  18   2  138.20   14.24
   0  18  -2  114.30   12.48
   0 -18   3  132.70   13.27
   0 -18   3   90.36   11.17
   0 -18  -3   93.12   10.96
   0  18   3  100.10   13.04
   0 -18   4  282.30   17.95
   0 -18   4  305.70   18.77
   0 -18  -4  301.60   19.40
   0  18   4  263.80   18.96
   0 -18   5  502.30   27.73
   0 -18   5  500.10   27.80
   0 -18  -5  492.10   27.72
   0  18   5  484.60   27.75
   0 -18   6   74.65    9.06
   0 -18   6   75.12    9.80
   0 -18  -6   82.98   12.85
   0  18   6   86.78   12.59
   0 -18   7    6.38    8.21
   0 -18   7   -8.28    7.90
   0 -18  -7   24.34   10.86
   0  18   7   15.16   10.22
   0 -18   8   13.60    7.72
   0 -18   8   20.67    8.80
   0 -18  -8    6.15    9.90
   0  18   8    7.00    9.68
   0 -18   9   61.41    9.31
   0 -18   9   76.47    9.02
   0 -18  -9   57.31   11.25
   0  18   9   70.61   11.17
   0 -18  10   65.62    8.58
   0 -18  10   57.23    7.69
   0 -18 -10   65.08   11.92
   0  18  10   55.20   10.31
   0 -18  11    7.52    6.99
   0 -18  11    1.91    6.77
   0 -18 -11  -16.69   10.33
   0  18  11   -0.53    9.69
   0 -18  12   19.74    6.10
   0 -18  12   27.87    6.95
   0 -18 -12   34.35    9.56
   0  18  12   21.09    9.25
   0 -19   0   -4.10   10.16
   0  19   0   15.64    9.75
   0 -19   1   34.02   10.70
   0 -19  -1   22.91    9.97
   0  19   1   18.10   11.17
   0  19  -1    8.00   10.03
   0 -19   2  190.70   15.15
   0 -19   2  163.90   14.19
   0 -19  -2  192.30   15.40
   0  19   2  196.60   16.37
   0  19  -2  228.40   16.48
   0 -19   3  216.10   15.26
   0 -19   3  223.00   15.83
   0 -19  -3  202.70   15.32
   0  19   3  208.60   17.31
   0 -19   4  149.40   12.61
   0 -19   4  161.90   13.32
   0 -19  -4  155.10   14.51
   0  19   4  156.00   14.73
   0 -19   5  475.20   26.26
   0 -19   5  483.20   26.94
   0 -19  -5  451.00   26.12
   0  19   5  483.30   27.75
   0 -19   6   18.22    8.41
   0 -19   6    5.44    8.39
   0 -19  -6   10.39   11.44
   0  19   6   27.12   10.12
   0 -19   7   73.81    9.65
   0 -19   7   66.65    9.29
   0 -19  -7   68.61   11.54
   0  19   7   65.73   11.02
   0 -19   8   -3.48    7.74
   0 -19   8   16.59    9.23
   0 -19  -8   16.30   10.32
   0  19   8    2.01   10.51
   0 -19   9   65.62    9.26
   0 -19   9   72.42    8.70
   0 -19  -9   80.56   11.60
   0  19   9   54.08   10.46
   0 -19  10   29.73    7.11
   0 -19  10   36.49    7.64
   0 -19 -10   30.86   11.18
   0  19  10   25.90    9.25
   0 -19  11  104.00    9.22
   0 -19  11   88.20    8.42
   0 -19 -11  103.90   12.04
   0  19  11   97.86   10.89
   0 -19  12   -3.32    5.20
   0 -19  12    0.65    6.65
   0 -19 -12   14.26    9.37
   0  19  12   11.00    8.81
   0 -20   0   89.43   10.86
   0  20   0   73.84   12.04
   0 -20   1  705.20   37.26
   0 -20  -1  758.40   39.89
   0  20   1  680.60   36.95
   0  20  -1  662.10   35.52
   0 -20   2    5.20    9.66
   0 -20   2    9.57    9.09
   0 -20  -2    9.56   10.46
   0  20   2    6.01   11.44
   0  20  -2   24.72    9.28
   0 -20   3    5.80    9.57
   0 -20   3    8.18    8.84
   0 -20  -3   -1.67    9.82
   0  20   3   -0.14   11.28
   0 -20   4  379.70   22.38
   0 -20   4  403.80   23.35
   0 -20  -4  401.90   24.37
   0  20   4  389.20   23.50
   0 -20   5  102.40   10.76
   0 -20   5  117.80   11.32
   0 -20  -5  115.60   12.00
   0  20   5  118.70   12.55
   0 -20   6   16.60    7.94
   0 -20   6   24.26    8.65
   0 -20  -6   18.93   10.33
   0  20   6   20.54    9.97
   0 -20   7   10.32    7.71
   0 -20   7   14.20    8.14
   0 -20  -7   -7.12   10.80
   0  20   7    7.60    9.79
   0 -20   8   -1.69    7.74
   0 -20   8   -8.22    7.64
   0 -20  -8   12.31   10.51
   0  20   8    5.64   10.29
   0 -20   9   98.89    9.29
   0 -20   9  106.90    9.42
   0 -20  -9  111.80   12.94
   0  20   9  112.40   12.69
   0 -20  10   41.27    7.70
   0 -20  10   38.95    7.63
   0 -20 -10   22.83   12.20
   0  20  10   24.46    9.30
   0 -20  11    7.26    6.18
   0 -20  11    1.62    6.47
   0 -20 -11    3.64    9.37
   0  20  11   16.25    8.81
   0 -21   0   -4.19    9.23
   0  21   0   -7.64    9.33
   0 -21   1  119.90   11.94
   0 -21  -1   96.59   12.05
   0  21   1   93.25   12.51
   0  21  -1  102.60   11.48
   0 -21   2   29.86    9.12
   0 -21   2   31.91    9.84
   0 -21  -2   25.42   11.27
   0  21   2   34.37   11.80
   0  21  -2    9.13    9.16
   0 -21   3  509.20   28.63
   0 -21   3  490.90   27.62
   0 -21  -3  486.40   27.36
   0  21   3  540.90   30.57
   0 -21   4    2.44    9.23
   0 -21   4    6.46    9.47
   0 -21  -4   27.53   11.20
   0  21   4    2.34   10.09
   0 -21   5  100.50   10.87
   0 -21   5  107.10   11.07
   0 -21  -5   98.43   12.06
   0  21   5  106.10   11.72
   0 -21   6   64.52    9.00
   0 -21   6   52.34    9.23
   0 -21  -6   56.80   11.60
   0  21   6   57.74   10.08
   0 -21   7   14.42    7.96
   0 -21   7   16.49    8.16
   0 -21  -7   -8.03   10.48
   0  21   7    5.39    9.87
   0 -21   8   27.09    7.93
   0 -21   8   34.21    8.27
   0 -21  -8   45.75   11.48
   0  21   8    5.72    9.78
   0 -21   9   26.38    8.48
   0 -21   9   31.05    7.30
   0 -21  -9   11.50   10.44
   0  21   9    5.97    9.13
   0 -21  10    6.42    6.60
   0 -21  10    9.72    6.86
   0 -21 -10    7.39   10.04
   0  21  10    3.89    8.89
   0 -21  11   58.23    7.35
   0 -21  11   52.61    6.98
   0 -21 -11   49.35   10.25
   0  21  11   45.61    9.47
   0 -22   0  650.10   34.75
   0  22   0  677.30   36.27
   0 -22   1  174.40   13.22
   0 -22  -1  145.00   13.41
   0  22   1  150.90   13.99
   0  22  -1  182.30   14.63
   0 -22   2  418.50   23.99
   0 -22   2  426.90   24.60
   0 -22  -2  426.90   25.00
   0  22   2  416.40   24.79
   0  22  -2  416.10   23.69
   0 -22   3  115.90   12.02
   0 -22   3  103.90   11.08
   0 -22  -3  107.40   11.62
   0  22   3  120.00   13.32
   0 -22   4   39.45    9.59
   0 -22   4   16.39    9.19
   0 -22  -4   24.93   10.54
   0  22   4   38.13   10.29
   0 -22   5  217.80   15.11
   0 -22   5  190.90   14.03
   0 -22  -5  206.80   15.47
   0  22   5  228.50   15.88
   0 -22   6  111.60   10.72
   0 -22   6  141.00   11.82
   0 -22  -6  116.70   12.62
   0  22   6   91.22   11.75
   0 -22   7    1.12    7.81
   0 -22   7   10.29    8.07
   0 -22  -7    6.06   11.13
   0  22   7    1.52    8.98
   0 -22   8    0.47    7.63
   0 -22   8    7.53    7.35
   0 -22  -8    3.81    9.91
   0  22   8   12.68    9.59
   0 -22   9   81.69    9.35
   0 -22   9   90.29    9.10
   0 -22  -9   93.64   12.14
   0  22   9   78.57    9.90
   0 -22  10   -8.17    6.60
   0 -22  10   -1.41    6.11
   0 -22 -10  -12.07    9.34
   0  22  10    5.78    8.78
   0 -22  11   25.22    6.88
   0 -22  11   13.38    6.21
   0 -22 -11   24.90    8.81
   0  22  11   36.56   11.05
   0 -23   0   -8.64    9.20
   0  23   0  -13.04   10.59
   0 -23   1   99.95   11.11
   0 -23   1   82.77   10.49
   0 -23  -1   98.81   11.53
   0  23   1   97.77   11.69
   0  23  -1   66.49   10.99
   0 -23   2   93.73    9.94
   0 -23   2   84.65   10.43
   0 -23  -2  113.70   12.87
   0  23   2   63.42   11.56
   0  23  -2   93.26    9.93
   0 -23   3  400.10   22.93
   0 -23   3  442.70   25.03
   0 -23  -3  481.20   26.82
   0  23   3  453.50   25.87
   0 -23   4   50.11   10.29
   0 -23   4   19.99    8.94
   0 -23  -4   47.38   10.83
   0  23   4   35.30   10.15
   0 -23   5   78.32   11.02
   0 -23   5   66.83   10.04
   0 -23  -5   67.52   10.24
   0  23   5   59.86   10.39
   0 -23   6   26.65    8.38
   0 -23   6   28.78    8.59
   0 -23  -6   28.74    9.62
   0  23   6   -0.54    9.97
   0 -23   7    2.80    7.21
   0 -23   7    5.25    7.67
   0 -23  -7    9.66   10.56
   0  23   7    6.17   10.76
   0 -23   8   32.36    7.62
   0 -23   8   35.77    7.81
   0 -23  -8   59.58   11.48
   0  23   8   41.49    9.69
   0 -23   9   17.42    8.12
   0 -23   9   -4.14    6.77
   0 -23  -9    1.77    9.72
   0  23   9    5.92    8.35
   0 -23  10    0.83    6.14
   0 -23  10    5.38    7.24
   0 -23 -10  -19.99    9.64
   0  23  10    5.33    8.39
   0 -24   0   18.83    9.43
   0  24   0   41.04   11.59
   0 -24   1  314.80   19.65
   0 -24   1  295.60   18.52
   0 -24  -1  338.80   21.05
   0  24   1  331.90   20.90
   0  24  -1  315.80   19.69
   0 -24   2  -13.74    8.75
   0 -24   2   -7.24    8.62
   0 -24  -2  -16.07   10.37
   0  24   2    5.13    9.85
   0  24  -2    6.80    8.30
   0 -24   3   64.52    9.72
   0 -24   3   85.35   10.06
   0 -24  -3   73.41   10.69
   0  24   3   92.42   11.45
   0 -24   4  187.30   13.86
   0 -24   4  184.60   13.44
   0 -24  -4  182.30   15.25
   0  24   4  177.20   13.88
   0 -24   5  189.40   13.71
   0 -24   5  200.70   14.52
   0 -24  -5  189.00   14.08
   0  24   5  213.50   15.58
   0 -24   6   79.75   10.30
   0 -24   6   82.97    9.22
   0 -24  -6   77.63   12.24
   0  24   6   77.68   11.50
   0 -24   7    7.17    7.51
   0 -24   7   15.69    6.82
   0 -24  -7    0.43   10.76
   0  24   7   12.76    9.93
   0 -24   8    2.32    7.57
   0 -24   8   -6.23    6.88
   0 -24  -8    5.47   10.18
   0  24   8   11.67    8.45
   0 -24   9   24.52    7.55
   0 -24   9   33.90    7.37
   0 -24  -9   35.81    9.36
   0  24   9   14.45    8.46
   0 -24  10   11.88    6.15
   0 -24  10   17.24    6.42
   0 -24 -10   10.84    8.38
   0  24  10    0.24   10.33
   0 -25   0    1.64    8.38
   0  25   0  -10.94   11.01
   0 -25   1   17.20    9.02
   0 -25   1    8.82    7.83
   0 -25  -1   -6.02    9.90
   0  25   1   -4.17    9.78
   0  25  -1   27.85    9.52
   0 -25   2  157.60   12.66
   0 -25   2  187.80   13.86
   0 -25  -2  165.20   14.00
   0  25   2  180.00   14.29
   0 -25   3   27.21    9.04
   0 -25   3   44.72    9.40
   0 -25  -3   29.96    9.74
   0  25   3   40.16   10.32
   0 -25   4   12.66    8.16
   0 -25   4    8.98    8.51
   0 -25  -4   24.86   11.02
   0  25   4   12.01   10.38
   0 -25   5  239.70   16.36
   0 -25   5  219.20   14.30
   0 -25  -5  210.10   14.85
   0  25   5  251.60   17.01
   0 -25   6   19.27    7.65
   0 -25   6   14.41    8.60
   0 -25  -6   16.35   10.27
   0  25   6   17.67   10.02
   0 -25   7   10.52    7.24
   0 -25   7    6.60    7.74
   0 -25  -7   19.19   11.25
   0  25   7   17.56    9.60
   0 -25   8    3.83    6.94
   0 -25   8   -0.78    6.69
   0 -25  -8    1.53    8.82
   0  25   8    6.74    8.09
   0 -25   9   19.98    7.10
   0 -25   9   15.39    6.90
   0 -25  -9   16.61    8.39
   0  25   9    2.51    7.42
   0 -26   0  103.60   10.47
   0  26   0  105.80   13.16
   0 -26   1  120.20   11.42
   0 -26   1  110.70   11.30
   0 -26  -1  128.70   12.01
   0  26   1  107.40   12.68
   0  26  -1  112.50   11.76
   0 -26   2   14.67    8.78
   0 -26   2    9.54    8.35
   0 -26  -2    1.48    9.76
   0  26   2    6.18    9.22
   0 -26   3   60.56    9.16
   0 -26   3   58.34    9.66
   0 -26  -3   42.89    9.74
   0  26   3   71.13   10.96
   0 -26   4   58.94    9.04
   0 -26   4   44.27    9.53
   0 -26  -4   70.11   11.50
   0  26   4   78.18   11.08
   0 -26   5   79.40    9.78
   0 -26   5   59.44    9.26
   0 -26  -5   65.12    9.47
   0  26   5   87.21   11.67
   0 -26   6   15.98    8.59
   0 -26   6   12.86    8.09
   0 -26  -6    9.44   10.90
   0  26   6    3.68   10.16
   0 -26   7   -8.02    7.54
   0 -26   7   -6.93    7.02
   0 -26  -7   -0.85   10.10
   0  26   7    3.42    8.78
   0 -26   8   17.61    6.86
   0 -26  -8   11.93    9.44
   0  26   8    6.34    7.84
   0 -26   9    5.49    6.40
   0 -26   9   15.37    6.71
   0 -26  -9   14.10    8.26
   0  26   9    6.59    8.13
   0 -27   0    0.08    8.20
   0  27   0    1.84    9.47
   0 -27   1   36.98    8.35
   0 -27   1    2.21    8.41
   0 -27  -1   25.47    9.70
   0  27   1   24.00   10.57
   0  27  -1   14.75    9.33
   0 -27   2   34.58    8.73
   0 -27   2   54.92    9.68
   0 -27  -2   36.41    9.62
   0  27   2   47.50    9.75
   0 -27   3  101.60   10.51
   0 -27   3  113.10   11.00
   0 -27  -3  117.80   11.90
   0  27   3   98.51   11.04
   0 -27   4   17.93    8.40
   0 -27   4   23.64    8.36
   0 -27  -4   13.39   10.07
   0  27   4   18.66    9.97
   0 -27   5    6.97    7.93
   0 -27   5  -12.13    8.16
   0 -27  -5    1.91    9.85
   0  27   5   13.45    9.08
   0 -27   6    9.86    6.95
   0 -27   6    6.54    7.79
   0 -27  -6   -9.87    9.93
   0  27   6   -6.58    8.74
   0 -27   7   56.32    8.47
   0 -27   7   68.00    8.21
   0 -27  -7   60.17   10.02
   0  27   7   57.29    9.51
   0 -27   8   18.33    6.75
   0 -27   8    2.52    6.29
   0 -27  -8   -2.25    8.28
   0  27   8   10.81    7.65
   0 -28   0   22.47    8.27
   0  28   0   17.21    9.49
   0 -28   1   69.75    9.36
   0 -28   1   98.37   10.82
   0 -28  -1   76.71   10.49
   0  28   1  106.60   12.27
   0  28  -1   70.31   10.09
   0 -28   2  169.70   12.82
   0 -28   2  146.30   11.96
   0 -28  -2  158.70   12.98
   0  28   2  155.90   13.28
   0 -28   3  -11.98    8.17
   0 -28   3   -2.06    7.43
   0 -28  -3   -3.65    9.45
   0  28   3  -10.16    8.74
   0 -28   4   33.88    8.35
   0 -28   4   13.92    8.47
   0 -28  -4   25.57    9.55
   0  28   4   36.75    9.52
   0 -28   5    5.42    7.48
   0 -28   5   30.43    7.56
   0 -28  -5   28.79    9.30
   0  28   5   38.61    9.38
   0 -28   6   61.26    8.16
   0 -28   6   55.39    7.97
   0 -28  -6   54.37    9.82
   0  28   6   78.14    9.73
   0 -28   7   -6.85    6.72
   0 -28   7    8.16    6.96
   0 -28  -7    9.41    8.73
   0  28   7    8.83    8.77
   0 -28   8    7.73    5.86
   0 -28   8    8.26    6.85
   0 -28  -8   12.04    7.98
   0  28   8    6.63    7.51
   0 -29   0    3.90    6.93
   0 -29   0    2.60    8.16
   0  29   0    1.27    7.80
   0 -29   1   80.85    9.85
   0 -29   1   81.16    9.59
   0 -29  -1   63.27   10.11
   0  29   1   75.07   10.45
   0  29  -1   95.53    9.89
   0 -29   2    6.30    7.72
   0 -29   2   -7.32    7.78
   0 -29  -2   15.24    9.10
   0  29   2   15.04    8.54
   0 -29   3    2.37    7.46
   0 -29   3    8.95    7.71
   0 -29  -3   -1.84    9.99
   0  29   3  -15.19    7.58
   0 -29   4   12.42    8.48
   0 -29   4    5.25    7.69
   0 -29  -4   14.36   10.39
   0  29   4   16.94    8.94
   0 -29   5    0.19    7.65
   0 -29   5    6.76    7.16
   0 -29  -5   19.62    8.75
   0  29   5    0.35    8.77
   0 -29   6    4.99    7.02
   0 -29   6   -6.34    6.45
   0 -29  -6  -15.27    8.62
   0  29   6   -2.37    8.22
   0 -29   7   28.00    6.03
   0 -29   7   28.88    6.58
   0 -29  -7   27.71    8.44
   0  29   7   16.32    8.59
   0 -30   0  223.40   14.66
   0 -30   0  269.50   17.13
   0  30   0  237.80   15.07
   0 -30   1   28.83    8.45
   0 -30   1   34.89    7.97
   0 -30  -1   29.33    9.18
   0  30   1   17.36    9.01
   0  30  -1   17.81    7.25
   0 -30   2    8.43    7.48
   0 -30   2   -1.04    7.94
   0 -30  -2    2.22    8.29
   0  30   2   -8.18    7.62
   0 -30   3   -1.79    7.17
   0 -30   3   -4.66    7.78
   0 -30  -3   -0.27    8.76
   0  30   3   -4.60    8.21
   0 -30   4   -6.45    7.05
   0 -30   4    4.98    7.50
   0 -30  -4   -4.63    9.15
   0  30   4    4.38    7.96
   0 -30   5    9.93    7.10
   0 -30   5    7.09    6.48
   0 -30  -5    6.76    7.27
   0  30   5   19.24    9.02
   0 -30   6   33.54    6.65
   0 -30   6   17.63    6.55
   0 -30  -6   27.95    7.20
   0  30   6   16.54    8.49
   0 -31   0   -1.71    8.64
   0 -31   0    1.44    7.89
   0  31   0    6.36    6.96
   0 -31   1   57.67    8.99
   0 -31   1   39.39    7.88
   0 -31  -1   54.74    9.10
   0  31   1   66.94    9.07
   0 -31   2   75.95    9.26
   0 -31   2   65.77    8.35
   0 -31  -2   72.13    8.41
   0  31   2   79.27   10.04
   0 -31   3   15.11    7.50
   0 -31   3    0.45    6.71
   0 -31  -3   -0.56    9.00
   0  31   3   19.33    8.60
   0 -31   4    4.25    6.99
   0 -31   4    6.43    6.84
   0 -31  -4  -18.85    8.22
   0  31   4   -5.42    7.72
   0 -31   5   18.52    8.55
   0 -31   5   14.58    7.76
   0 -31  -5    9.57    7.39
   0  31   5    6.03    8.58
   0 -32   0   37.65    8.56
   0 -32   0   38.85    8.55
   0  32   0   54.33    8.28
   0 -32   1   12.81    7.79
   0 -32   1    8.32    6.99
   0 -32  -1   10.66    7.88
   0  32   1   34.37    8.16
   0 -32   2    7.10    6.15
   0 -32   2   -1.73    6.98
   0 -32  -2    2.61    6.97
   0  32   2    3.53    7.93
   0 -32   3    0.70    7.18
   0 -32   3    7.00    7.98
   0 -32  -3   -1.92    8.28
   0  32   3    9.99    7.61
   0 -32   4    6.97    7.23
   0 -32   4   -5.83    8.12
   0 -32  -4   -4.71    7.33
   0  32   4   -1.21    7.14
   0 -33   0  -10.52    9.92
   0 -33   0    1.00    7.75
   0  33   0    3.44    6.15
   0 -33   1   13.23    7.12
   0 -33   1   20.82    9.51
   0 -33  -1   29.72   11.12
   0 -33  -1   15.22    7.38
   0  33   1   20.98    6.79
   0 -33   2   43.26    9.43
   0 -33   2   39.18    8.52
   0 -33  -2   14.79    7.22
   0  33   2   24.58    7.03
   1   0 -15    8.44    6.25
  -1   0  15    1.72    6.36
   1   0 -14   19.68    7.95
  -1   0  14   20.21    8.82
   1   0 -13    7.88    9.22
  -1   0  13   29.65   10.03
   1   0 -12  274.40   18.05
  -1   0  12  328.10   20.03
   1   0 -11    0.43    9.81
  -1   0  11    4.62    9.36
   1   0 -10   68.57   11.28
  -1   0  10   54.18   10.04
   1   0  -9    0.97   10.31
  -1   0   9  -18.92   10.81
   1   0  -8   69.39    9.65
  -1   0   8  103.50   12.26
   1   0  -7   -1.64    7.83
  -1   0   7    2.42    9.22
   1   0  -6 1691.00   84.15
  -1   0   6 1789.00   89.39
   1   0  -4 4042.00  198.30
  -1   0   4 4065.00  199.50
   1   0  -3    4.24   10.58
  -1   0   3   31.71   11.05
   1   0  -2 2227.00  109.30
  -1   0   2 2439.00  119.60
   1   0  -1    6.87    4.47
  -1   0   1    7.99    4.47
   1   0   1    1.95    4.79
  -1   0  -1   -1.80    5.05
   1   0   2  954.60   48.09
  -1   0  -2  889.80   44.70
   1   0   3   -5.74    8.94
  -1   0  -3    2.34    8.03
   1   0   4 1678.00   83.29
  -1   0  -4 1748.00   86.55
   1   0   5    4.75    8.70
  -1   0  -5    8.21    8.28
   1   0   6   19.62    9.18
  -1   0  -6   26.51    9.04
   1   0   7   -1.55    9.86
  -1   0  -7   33.09    9.63
   1   0   8  643.30   34.60
  -1   0  -8  666.60   35.54
   1   0   9   -1.59    9.84
  -1   0  -9   10.14   10.09
   1   0  10  303.70   18.50
  -1   0 -10  295.90   18.85
   1   0  11   -7.39    8.36
  -1   0 -11   -0.11    9.53
   1   0  12  100.50   10.66
  -1   0 -12   94.19   10.41
   1   0  13    2.74    8.70
  -1   0 -13    0.84    8.01
   1   0  14   15.49    7.77
  -1   0 -14    4.67    6.83
   1  -1 -15   -4.21    5.80
  -1  -1  15   13.20    7.64
   1   1 -15   14.68    6.21
  -1   1  15   12.75    7.38
   1  -1 -14   -0.39    8.67
  -1  -1  14    6.89    8.46
   1   1 -14   12.97    7.56
  -1   1  14   -2.15    8.58
   1  -1 -13   72.19   10.61
  -1  -1  13   76.99   10.45
   1  -1 -11   27.02   10.55
  -1  -1  11   27.60    9.83
   1   1 -11   42.21    9.84
  -1   1  11   39.81    9.96
   1  -1 -10    1.49   10.75
  -1  -1  10   16.42    9.68
   1   1 -10   -0.85    9.88
  -1   1  10    9.49    9.74
   1  -1  -9   33.60    9.36
  -1  -1   9   36.21   10.56
   1   1  -9   25.39   10.32
  -1   1   9   23.17   10.13
   1  -1  -8   23.01    9.43
  -1  -1   8   41.66   10.66
   1   1  -8   24.49    8.89
  -1   1   8   22.35   10.16
   1  -1  -7   77.00    9.50
  -1  -1   7   64.92   10.17
   1   1  -7   82.72    9.92
  -1   1   7   63.29   10.84
   1  -1  -6  189.60   13.95
  -1  -1   6  185.90   13.97
   1  -1  -5 1222.00   61.43
  -1  -1   5 1212.00   61.17
   1   1  -5 1055.00   53.20
  -1   1   5 1210.00   61.22
   1   1  -4  453.20   24.93
  -1   1   4  418.20   24.17
   1  -1  -3  294.80   18.70
  -1  -1   3  262.90   17.46
   1   1  -3  292.20   18.02
  -1   1   3  290.80   19.20
   1  -1  -2  275.80   16.09
  -1  -1   2  263.70   15.54
   1   1  -2  225.80   13.35
  -1   1   2  277.20   16.31
   1  -1  -1   23.13    5.15
  -1  -1   1   17.51    4.36
   1   1  -1   15.78    3.69
  -1   1   1   20.92    5.22
   1  -1   2  117.90   10.26
  -1  -1  -2  127.70   10.73
   1   1   2  102.70   10.56
  -1   1  -2  107.40    9.93
   1  -1   3 2561.00  126.30
  -1  -1  -3 2497.00  123.10
   1   1   3 2205.00  109.10
  -1   1  -3 2263.00  111.80
   1  -1   4  523.20   28.09
  -1  -1  -4  493.10   26.33
   1   1   4  454.20   25.04
  -1   1  -4  512.90   27.54
   1  -1   5 2079.00  102.80
  -1  -1  -5 2154.00  106.50
   1  -1   6  103.70   10.60
  -1  -1  -6   98.77    9.70
   1   1   6   85.85   10.89
  -1   1  -6  110.50   11.21
   1  -1   7  680.30   36.01
  -1  -1  -7  621.30   32.87
   1   1   7  621.70   33.43
  -1   1  -7  736.50   38.31
   1  -1   8   55.24   10.34
  -1  -1  -8   40.47    9.78
   1   1   8   70.84   11.60
  -1   1  -8   51.44    8.71
   1  -1   9  216.30   16.11
  -1  -1  -9  206.20   15.53
   1  -1  11   21.70    8.81
  -1  -1 -11   14.25    9.64
   1   1  11    2.34    8.77
  -1   1 -11   13.95    8.85
   1  -1  12   30.79    8.70
  -1  -1 -12   20.15    9.36
   1   1  12    4.74    9.21
  -1   1 -12   30.58    8.72
   1  -1  13    4.39    8.47
  -1  -1 -13   -1.41    7.85
   1   1  13   13.57    9.28
  -1   1 -13    6.13    8.15
   1  -1  14    4.24    7.47
  -1  -1 -14  -11.08    7.43
   1   1  14    0.91    7.24
  -1   1 -14   -4.70    6.55
   1  -2 -15    3.63    6.61
  -1  -2  15   -0.53    7.35
   1   2 -15    2.41    5.18
  -1   2  15    6.75    7.09
   1  -2 -14   20.05    9.16
  -1  -2  14   13.96    7.24
   1   2 -14   -1.82    7.02
  -1   2  14   16.97    9.14
   1  -2 -13    4.37    9.55
  -1  -2  13   17.03    8.64
   1   2 -13   15.49    8.19
  -1   2  13   17.63   10.87
   1  -2 -12  350.00   21.60
  -1  -2  12  358.50   20.84
   1   2 -12  353.10   20.83
  -1   2  12  334.30   20.57
   1  -2 -11    0.14   10.46
  -1  -2  11   20.42    9.51
   1   2 -11   27.91    9.38
  -1   2  11    7.29   10.34
   1  -2 -10   70.50   10.84
  -1  -2  10   65.55   10.45
   1   2 -10   73.78   10.44
  -1   2  10   61.51   10.57
   1  -2  -9    2.77    9.55
  -1  -2   9   13.68   10.01
   1   2  -9    3.75    9.24
  -1   2   9    2.42   10.15
   1  -2  -8  223.50   15.50
  -1  -2   8  227.80   15.69
   1  -2  -7   31.07    9.01
  -1  -2   7   45.61    8.96
   1   2  -7   35.13    9.40
  -1   2   7   44.28    9.92
   1  -2  -6 2598.00  128.20
  -1  -2   6 2626.00  129.70
   1   2  -6 2837.00  139.90
  -1   2   6 2566.00  126.90
   1   2  -5  123.10   11.03
  -1   2   5  115.40   11.95
   1  -2  -4   23.53   10.41
  -1  -2   4   17.60    9.53
   1   2  -4   22.53    9.78
  -1   2   4   34.99   10.99
   1  -2  -3 1813.00   90.14
  -1  -2   3 1663.00   82.93
   1   2  -3 1808.00   89.98
  -1   2   3 1882.00   93.55
   1  -2  -2  250.00   15.28
  -1  -2   2  228.10   13.87
   1   2  -2  219.50   13.50
  -1   2   2  224.30   14.58
   1  -2  -1   77.69    8.03
  -1  -2   1   56.50    5.68
   1   2  -1   58.12    5.51
  -1   2   1   69.44    6.77
   1  -2   0  120.20    8.54
  -1  -2   0  121.90    7.06
   1   2   0  116.80    7.42
  -1   2   0  109.00    8.03
   1  -2   1  412.00   22.04
  -1  -2  -1  388.40   19.95
   1   2   1  316.10   16.89
  -1   2  -1  322.40   17.51
   1  -2   3 1308.00   65.71
  -1  -2  -3 1105.00   55.67
   1   2   3 1097.00   55.66
  -1   2  -3  940.80   47.84
   1  -2   4 1876.00   92.95
  -1  -2  -4 1646.00   81.72
   1   2   4 1444.00   72.12
  -1   2  -4 1602.00   79.55
   1  -2   5  361.20   20.64
  -1  -2  -5  308.50   18.21
   1   2   5  258.00   16.92
  -1   2  -5  269.30   16.37
   1  -2   6  141.00   11.74
  -1  -2  -6  110.20   10.44
   1   2   6  141.00   12.67
  -1   2  -6  120.80   10.54
   1   2   7  266.60   17.59
  -1   2  -7  310.80   18.46
   1   2   8 1107.00   56.66
  -1   2  -8 1278.00   64.32
   1  -2   9   34.93    9.79
  -1  -2  -9    8.12   10.24
   1   2   9  -10.32   10.11
  -1   2  -9   16.18    8.57
   1  -2  10   72.84   10.68
  -1  -2 -10   72.50   11.19
   1   2  10   53.89    9.84
  -1   2 -10   81.01   10.03
   1  -2  11   16.60    8.69
  -1  -2 -11   16.91   10.57
   1   2  11    6.95    9.16
  -1   2 -11    8.15    8.14
   1  -2  12   52.58    9.24
  -1  -2 -12   38.93    9.98
   1   2  12   33.35   10.00
  -1   2 -12   57.50    9.10
   1  -2  13   -4.87    8.23
  -1  -2 -13   -1.81    9.03
   1   2  13   -1.31    9.12
  -1   2 -13    6.72    7.94
   1  -2  14    4.17    7.23
  -1  -2 -14    8.42    7.32
   1  -3 -15   10.40    7.47
  -1  -3  15   21.91    6.69
   1   3 -15   17.87    5.94
  -1   3  15   15.52    7.33
   1  -3 -14   -3.04    8.35
  -1  -3  14    7.21    8.02
   1   3 -14   10.43    7.38
  -1   3  14    6.18    8.33
   1  -3 -13   38.73   10.44
  -1  -3  13   43.86    8.51
   1   3 -13   49.42    8.98
  -1   3  13   54.41   12.04
   1   3 -12   83.99    9.78
  -1   3  12   54.60   11.68
   1  -3 -11   59.67   10.74
  -1  -3  11   65.68   10.31
   1   3 -11   68.42    9.42
  -1   3  11   65.00   11.03
   1  -3 -10   33.37   10.63
  -1  -3  10   55.68   10.17
   1  -3  -9    7.33    9.36
  -1  -3   9   10.89    9.61
   1   3  -9   -0.05    9.19
  -1   3   9   11.01   11.33
   1   3  -8   53.33    8.96
  -1   3   8   51.54   11.07
   1  -3  -7  612.60   32.73
  -1  -3   7  708.50   36.88
   1   3  -7  651.40   34.30
  -1   3   7  640.30   34.44
   1   3  -6   -8.95    8.28
  -1   3   6   20.71   10.41
   1  -3  -5   81.02   10.81
  -1  -3   5   81.26   10.35
   1   3  -5   83.17    9.80
  -1   3   5   84.03   10.90
   1   3  -4  156.70   12.39
  -1   3   4  136.80   13.52
   1  -3  -3  214.70   16.22
  -1  -3   3  213.90   15.14
   1   3  -3  194.50   14.38
  -1   3   3  207.50   15.59
   1  -3  -2 1413.00   70.18
  -1  -3   2 1356.00   67.49
   1   3  -2 1267.00   62.96
  -1   3   2 1239.00   61.79
   1  -3  -1  254.00   14.82
  -1  -3   1  224.00   13.03
   1   3  -1  218.50   12.58
  -1   3   1  252.10   15.42
   1  -3   0  826.80   41.46
  -1  -3   0  862.80   42.71
   1   3   0  818.60   40.80
  -1   3   0  835.30   41.96
   1  -3   1  731.60   37.17
   1  -3   1  688.70   35.31
  -1  -3  -1  615.10   30.91
   1   3   1  563.70   28.77
  -1   3  -1  534.10   27.59
   1  -3   2  885.90   45.75
  -1  -3  -2  801.30   40.97
   1   3   2  727.40   37.77
  -1   3  -2  762.90   39.75
   1   3   3 2842.00  140.10
  -1   3  -3 2737.00  134.80
   1  -3   4 3025.00  148.70
  -1  -3  -4 2648.00  130.40
   1   3   4 2278.00  112.40
  -1   3  -4 2514.00  123.90
   1  -3   5 2275.00  112.40
  -1  -3  -5 1907.00   94.54
   1   3   5 2059.00  102.20
  -1   3  -5 1963.00   97.23
   1  -3   6  152.30   11.99
  -1  -3  -6  114.10   10.94
   1   3   6  118.40   13.07
  -1   3  -6  115.60   10.39
   1   3   7 1391.00   70.20
  -1   3  -7 1404.00   70.31
   1   3   8  287.00   18.92
  -1   3  -8  312.20   18.70
   1  -3   9   48.08   10.47
  -1  -3  -9   37.78   10.23
   1   3   9   28.46   10.61
  -1   3  -9   50.09    9.53
   1  -3  10   36.89   10.22
  -1  -3 -10   30.97   10.59
   1   3  10   16.19    9.29
  -1   3 -10   46.07    9.66
   1  -3  11   19.33    9.27
  -1  -3 -11   21.66   10.24
   1   3  11    7.22    9.83
  -1   3 -11   20.97    8.99
   1  -3  12    7.08    8.67
  -1  -3 -12   11.92    9.01
   1   3  12   18.10   10.72
  -1   3 -12    4.19    7.92
   1  -3  13    0.34    8.05
  -1  -3 -13   -1.16    8.91
   1   3  13   -0.74    9.38
  -1   3 -13   19.75    7.90
   1  -3  14    7.62    7.30
  -1  -3 -14   -1.38    7.36
   1   3  14    0.63    7.35
  -1   3 -14    2.52    6.39
   1  -4 -15  -25.48    8.38
  -1  -4  15   -2.61    6.89
   1   4 -15    3.62    5.77
  -1   4  15   11.72    7.25
   1  -4 -14    6.06    8.93
  -1  -4  14   14.76    7.24
   1   4 -14   10.92    7.21
  -1   4  14   14.89    8.44
   1  -4 -13    7.74   10.22
  -1  -4  13    6.25    8.00
   1   4 -13   10.91    8.09
  -1   4  13   26.34   10.44
   1  -4 -12  205.20   15.78
  -1  -4  12  181.40   13.16
   1   4 -12  194.10   13.99
  -1   4  12  176.90   14.25
   1   4 -11  152.80   12.43
  -1   4  11  136.20   12.68
   1  -4 -10  147.90   13.72
  -1  -4  10  175.60   13.53
   1   4 -10  166.70   12.79
  -1   4  10  136.90   13.56
   1  -4  -9  133.60   12.74
  -1  -4   9  146.20   12.40
   1   4  -9  151.60   11.97
  -1   4   9  135.80   13.92
   1  -4  -8   69.00   10.92
  -1  -4   8   70.18   10.14
   1   4  -8   57.04    8.66
  -1   4   8   45.35   11.12
   1  -4  -7   70.83   10.61
  -1  -4   7  104.70   10.66
   1   4  -7   75.58    9.55
  -1   4   7   79.62   11.82
   1  -4  -6 1074.00   54.64
  -1  -4   6 1289.00   64.91
   1   4  -6 1259.00   63.24
  -1   4   6 1190.00   60.62
   1  -4  -5   -0.39    9.97
  -1  -4   5   -0.95    8.16
   1   4  -5   13.61    8.88
  -1   4   5    5.68    9.63
   1  -4  -4  569.00   30.73
  -1  -4   4  523.20   28.03
   1   4  -4  536.20   28.83
  -1   4   4  528.10   28.83
   1  -4  -3  540.20   29.67
  -1  -4   3  529.70   29.22
   1   4  -3  513.80   28.05
  -1   4   3  520.10   28.71
   1  -4  -2   18.87   10.28
  -1  -4   2    2.81    9.33
   1   4  -2   12.95   10.04
  -1   4   2   44.93   11.22
   1  -4  -1    0.72    8.07
  -1  -4   1   -6.42    7.67
  -1  -4   1   -0.27    7.14
  -1   4   1   -4.87    9.15
   1  -4   0  218.60   13.73
  -1  -4   0  214.30   12.82
   1   4   0  214.60   13.44
  -1   4   0  232.80   14.94
   1  -4   1  392.60   22.26
   1  -4   1  394.90   22.36
  -1  -4  -1  387.10   20.89
   1   4   1  350.70   19.70
  -1   4  -1  361.80   20.96
   1  -4   2  221.70   16.34
  -1  -4  -2  214.80   14.73
   1   4   2  167.20   13.50
  -1   4  -2  183.70   14.48
   1  -4   3   21.98    8.91
  -1  -4  -3   31.97    9.38
   1   4   3   24.52    9.88
  -1   4  -3   31.04    9.50
   1  -4   4    4.18    9.54
  -1  -4  -4   10.47    8.81
   1   4   4    2.39    8.45
  -1   4  -4    3.67    8.50
   1  -4   5  461.60   25.30
  -1  -4  -5  415.10   23.20
   1   4   5  402.90   23.08
  -1   4  -5  382.60   22.01
   1  -4   6   64.47    8.72
  -1  -4  -6   53.33    9.75
   1   4   6   46.13   10.59
  -1   4  -6   52.47    9.09
   1  -4   7  168.90   13.21
  -1  -4  -7  138.60   12.36
   1   4   7  138.40   13.25
  -1   4  -7  157.40   12.29
   1   4   8  555.80   30.73
  -1   4  -8  620.20   32.96
   1  -4   9   16.39    9.56
  -1  -4  -9    7.16    9.24
   1   4   9    8.52   10.19
  -1   4  -9    2.12    9.14
   1  -4  10  162.30   13.31
  -1  -4 -10  138.00   13.66
   1   4  10  128.30   12.37
  -1   4 -10  147.80   12.66
   1  -4  11   37.15    9.34
  -1  -4 -11   25.21   11.58
   1   4  11   22.19   10.14
  -1   4 -11   27.66    9.23
   1  -4  12   70.32    9.80
  -1  -4 -12   48.47   10.82
   1   4  12   58.03   10.54
  -1   4 -12   56.33    8.80
   1  -4  13    9.74    8.28
  -1  -4 -13    6.88    9.00
   1   4  13    6.54    8.10
  -1   4 -13    6.38    7.56
   1  -4  14    9.76    6.50
  -1  -4 -14   12.84    8.09
   1   4  14    3.91    7.22
  -1   4 -14   -3.42    6.45
   1  -5 -14   42.18    9.97
  -1  -5  14   17.22    6.40
   1  -5 -13   39.08   11.34
  -1  -5  13   45.11    8.38
   1   5 -13   38.48    8.32
  -1   5  13   49.68    9.89
   1  -5 -12    4.78   10.59
  -1  -5  12   31.67    8.49
   1   5 -12   22.11    8.44
  -1   5  12   23.67   10.59
   1  -5 -11    1.57   10.23
  -1  -5  11    9.43    9.00
   1   5 -11    6.60    8.36
  -1   5  11   -9.34    9.79
   1  -5 -10   80.45   11.80
  -1  -5  10  116.80   11.51
   1   5 -10  116.60   11.25
  -1   5  10  103.90   11.52
   1  -5  -9  234.40   16.52
  -1  -5   9  248.00   16.33
   1   5  -9  247.90   16.11
  -1   5   9  235.50   16.94
   1  -5  -8   43.46    9.98
  -1  -5   8   40.37    8.94
   1   5  -8   59.48    8.83
  -1   5   8   49.69   12.19
   1  -5  -7   81.55   11.16
  -1  -5   7  118.70   11.06
   1   5  -7   98.43   10.81
  -1   5   7  110.10   12.47
   1  -5  -6  617.90   33.20
  -1  -5   6  647.50   34.30
   1   5  -6  631.00   33.19
  -1   5   6  648.30   35.07
   1  -5  -5  273.80   18.13
  -1  -5   5  272.60   16.86
   1   5  -5  264.60   16.56
  -1   5   5  268.60   17.69
   1  -5  -4   84.32   11.03
  -1  -5   4  102.70   11.17
   1   5  -4  101.60   10.65
  -1   5   4   89.64   11.24
   1  -5  -3   67.25   13.15
  -1  -5   3   73.09    9.86
   1   5  -3   63.36   10.11
  -1   5   3   84.74   12.87
   1  -5  -2  511.00   28.67
  -1  -5   2  496.70   27.79
   1   5  -2  471.50   26.46
  -1   5   2  492.60   28.36
   1  -5  -1 5054.00  247.20
  -1  -5   1 4527.00  221.40
  -1  -5   1 4840.00  236.80
   1   5  -1 4697.00  229.80
  -1   5   1 4858.00  237.70
   1  -5   0 4455.00  218.00
  -1  -5   0 4686.00  229.00
   1   5   0 4501.00  220.10
  -1   5   0 4567.00  223.50
   1  -5   1 1636.00   81.58
   1  -5   1 1542.00   76.93
  -1  -5  -1 1574.00   78.06
   1   5   1 1422.00   71.03
  -1   5  -1 1495.00   74.87
   1  -5   2   39.36   11.96
   1  -5   2   30.39   10.59
  -1  -5  -2   40.03    9.21
   1   5   2   26.07    9.75
  -1   5  -2   42.69   11.18
   1  -5   3  371.40   20.90
  -1  -5  -3  372.70   21.20
   1   5   3  357.30   20.54
  -1   5  -3  367.70   21.27
   1  -5   4  441.80   24.98
  -1  -5  -4  389.20   22.45
   1   5   4  359.80   20.74
  -1   5  -4  360.40   21.36
   1  -5   5  443.30   24.46
  -1  -5  -5  421.20   23.83
   1   5   5  404.30   23.04
  -1   5  -5  414.60   23.51
   1  -5   6   42.22    8.09
  -1  -5  -6   44.99    9.32
   1   5   6   38.57   10.84
  -1   5  -6   46.76    9.25
   1  -5   7  306.80   18.59
  -1  -5  -7  250.00   16.90
   1   5   7  265.80   18.05
  -1   5  -7  250.20   16.28
   1   5   8  296.90   19.13
  -1   5  -8  310.40   18.94
   1   5   9   60.95   10.33
  -1   5  -9   72.78   10.29
   1  -5  10   39.18    9.63
  -1  -5 -10   38.32   10.32
   1   5  10   38.61   10.27
  -1   5 -10   29.19    8.86
   1  -5  11   12.50    8.75
  -1  -5 -11    7.44   10.50
   1   5  11   -4.55    9.60
  -1   5 -11   18.24    8.22
   1  -5  12    6.40    8.65
  -1  -5 -12  -11.57   10.59
   1   5  12  -17.06    9.55
  -1   5 -12   -0.26    7.70
   1  -5  13   20.04    7.83
  -1  -5 -13    0.34    8.95
   1   5  13   15.57    9.05
  -1   5 -13   14.73    7.89
   1  -5  14   -3.83    6.64
  -1  -5 -14   15.20    7.78
   1   5  14   -1.48    6.96
  -1   5 -14  -10.11    6.61
   1  -6 -14    2.29    9.39
  -1  -6  14   -1.11    6.55
   1   6 -14   -1.73    6.86
  -1   6  14    9.82    8.59
   1  -6 -13    0.62    9.96
  -1  -6  13   -2.54    8.16
   1   6 -13    1.95    7.49
  -1   6  13    7.91    9.58
   1  -6 -12  122.80   13.09
  -1  -6  12  145.70   11.46
   1   6 -12  147.10   11.54
  -1   6  12  154.00   13.19
   1  -6 -11  128.50   13.27
  -1  -6  11  143.50   11.94
   1   6 -11  137.30   11.94
  -1   6  11  114.70   11.69
   1  -6 -10   66.51   11.30
  -1  -6  10   55.18    9.15
   1   6 -10   58.32    9.66
  -1   6  10   28.67    9.70
   1  -6  -9   10.82    9.79
  -1  -6   9   40.76    8.80
   1   6  -9   13.77    8.67
  -1   6   9   30.49    9.78
   1  -6  -8   69.46   10.88
  -1  -6   8   80.18   10.45
   1   6  -8   65.42    9.36
  -1   6   8   49.69   10.88
   1  -6  -7  375.20   22.55
  -1  -6   7  429.50   24.19
   1   6  -7  412.40   23.27
  -1   6   7  349.50   21.55
   1  -6  -6  410.30   23.93
  -1  -6   6  383.40   21.57
   1   6  -6  432.30   24.07
  -1   6   6  421.90   24.89
   1  -6  -5    2.45   10.34
  -1  -6   5   -1.76    7.95
   1   6  -5   -2.77    8.72
  -1   6   5    8.27    8.98
   1  -6  -4  856.00   44.18
  -1  -6   4  832.90   42.94
   1   6  -4  850.50   43.69
  -1   6   4  840.60   43.49
   1  -6  -3  598.90   32.20
  -1  -6   3  579.80   30.78
   1   6  -3  556.50   29.91
  -1   6   3  517.20   28.20
   1  -6  -2  584.50   32.18
  -1  -6   2  524.30   28.84
  -1  -6   2  589.10   31.91
   1   6  -2  568.60   31.08
  -1   6   2  558.20   31.70
   1  -6  -1 5213.00  255.20
  -1  -6   1 5449.00  266.60
  -1  -6   1 4937.00  241.60
   1   6  -1 5413.00  265.00
  -1   6   1 5584.00  273.40
   1  -6   0   67.97   12.59
  -1  -6   0   33.61   11.19
   1   6   0   63.25   12.14
  -1   6   0   84.87   13.90
   1  -6   1  331.10   21.93
  -1  -6  -1  328.80   19.58
   1   6   1  292.00   18.92
  -1   6  -1  302.80   20.12
   1  -6   2    3.04   10.01
   1  -6   2    6.49    9.91
  -1  -6  -2    8.40    8.19
   1   6   2   16.84   10.09
   1  -6   3   86.29    9.94
  -1  -6  -3   91.01   10.43
   1   6   3   77.98   10.31
  -1   6  -3   75.65   10.49
   1  -6   4   38.51    8.96
  -1  -6  -4   38.21    9.52
   1   6   4    5.82    7.91
  -1   6  -4   16.91    9.05
   1  -6   5   67.78    9.88
  -1  -6  -5   67.86   10.66
   1   6   5   61.51   10.24
  -1   6  -5   53.59   10.58
   1  -6   6  150.60   11.30
  -1  -6  -6  138.40   12.54
   1   6   6  153.70   13.60
  -1   6  -6  151.20   12.85
   1  -6   7   13.05    8.03
  -1  -6  -7    4.81    9.64
   1   6   7   -2.62   10.43
  -1   6  -7    1.85    8.66
   1  -6   8  226.60   15.35
  -1  -6  -8  221.10   16.36
   1   6   8  193.60   14.98
  -1   6  -8  243.20   15.94
   1  -6   9   29.73    8.30
  -1  -6  -9   19.63   10.96
   1   6   9   27.77   10.01
  -1   6  -9   39.78    8.76
   1  -6  10  250.90   16.73
  -1  -6 -10  218.60   16.57
   1   6  10  229.30   16.24
  -1   6 -10  265.30   16.94
   1  -6  11   38.70    9.09
  -1  -6 -11   30.61    9.43
   1   6  11   39.62   10.28
  -1   6 -11   34.61    8.57
   1  -6  12   31.38    8.57
  -1  -6 -12   14.62    9.97
   1   6  12   17.85    8.96
  -1   6 -12   13.14    7.69
   1  -6  13   -7.31    7.64
  -1  -6 -13    3.36    9.34
   1   6  13   -2.08    8.68
  -1   6 -13    7.83    8.00
   1  -6  14    7.78    6.81
  -1  -6 -14    5.61    7.54
   1   6  14   -3.60    6.78
  -1   6 -14    2.83    5.98
   1  -7 -14   23.10    9.97
  -1  -7  14   35.03    7.35
   1   7 -14   26.30    6.48
  -1   7  14   20.65    8.81
   1  -7 -13   27.42   10.50
  -1  -7  13    5.12    8.24
   1   7 -13   23.09    7.77
  -1   7  13   23.69    9.51
   1  -7 -12   -3.49   10.85
  -1  -7  12   -2.00    7.77
   1   7 -12   15.90    7.75
  -1   7  12   29.85    9.77
   1  -7 -11    9.86   10.95
  -1  -7  11  -16.81    7.47
   1   7 -11    6.24    7.86
  -1   7  11   -3.50   10.26
   1  -7 -10  159.30   14.13
  -1  -7  10  172.00   12.67
   1   7 -10  137.60   11.93
  -1   7  10  135.50   12.11
   1  -7  -9  100.30   12.23
  -1  -7   9  117.10   10.62
   1   7  -9  115.40   11.32
  -1   7   9   97.15   10.95
   1  -7  -8  163.40   14.21
  -1  -7   8  195.70   13.97
   1   7  -8  188.10   13.79
  -1   7   8  167.30   14.31
   1  -7  -7 1038.00   53.53
  -1  -7   7 1080.00   54.96
   1   7  -7 1072.00   54.55
  -1   7   7 1050.00   54.09
   1  -7  -6  476.80   26.85
  -1  -7   6  421.70   23.26
   1   7  -6  464.20   26.06
  -1   7   6  432.00   25.22
   1  -7  -5  109.60   11.99
  -1  -7   5  105.10   11.43
   1   7  -5  113.10   11.36
  -1   7   5  108.00   13.24
   1  -7  -4  523.10   28.75
  -1  -7   4  533.70   28.58
   1   7  -4  519.00   28.08
  -1   7   4  554.90   30.67
   1  -7  -3  247.70   15.61
  -1  -7   3  227.60   15.21
   1   7  -3  211.50   14.96
  -1   7   3  228.70   15.62
   1  -7  -2   14.21    8.66
  -1  -7   2   24.93    9.92
  -1  -7   2   26.06    9.27
  -1   7   2    2.34   11.41
   1  -7  -1 4803.00  235.40
  -1  -7   1 4631.00  226.90
   1   7  -1 4845.00  237.60
  -1   7   1 4577.00  224.60
   1  -7   0 1911.00   95.17
  -1  -7   0 1925.00   95.60
   1   7   0 1870.00   93.28
  -1   7   0 1870.00   93.48
   1  -7   1  205.60   15.39
  -1  -7  -1  195.40   14.10
   1   7   1  198.10   15.43
  -1   7  -1  191.50   15.39
   1  -7   2  267.70   17.52
   1  -7   2  274.80   17.92
  -1  -7  -2  292.40   17.84
   1   7   2  250.00   17.36
   1  -7   3  139.00   12.26
   1  -7   3  145.00   12.72
  -1  -7  -3  137.00   12.69
   1   7   3  102.40   10.31
  -1   7  -3  118.90   11.79
   1  -7   4  557.10   29.82
  -1  -7  -4  532.90   29.03
   1   7   4  539.70   29.24
  -1   7  -4  555.30   30.13
   1  -7   5  484.90   27.26
  -1  -7  -5  448.00   25.21
   1   7   5  443.50   24.96
  -1   7  -5  428.80   24.29
   1  -7   6   23.25    7.87
  -1  -7  -6    7.18    9.67
   1   7   6   21.94   10.00
  -1   7  -6   16.14    8.90
   1  -7   7  365.30   20.69
  -1  -7  -7  381.60   22.71
   1   7   7  348.20   21.18
  -1   7  -7  373.20   22.14
   1  -7   8   58.83    9.93
  -1  -7  -8   65.97   11.74
   1   7   8   55.76   10.74
  -1   7  -8   55.05    9.57
   1  -7   9   12.30    8.32
  -1  -7  -9    1.01   10.37
   1   7   9    1.91    8.96
  -1   7  -9    5.01    8.56
   1  -7  10   49.07    9.54
  -1  -7 -10   40.71   10.83
   1   7  10   66.76   11.39
  -1   7 -10   65.91   10.23
   1  -7  11  -14.95    8.52
  -1  -7 -11    3.34    9.30
   1   7  11    0.92    9.78
  -1   7 -11    1.52    8.24
   1  -7  12   -5.62    7.67
  -1  -7 -12    3.02   10.02
   1   7  12  -12.31    8.99
  -1   7 -12   -5.47    7.37
   1  -7  13   16.46    7.61
  -1  -7 -13    4.47    9.72
   1   7  13   29.96    8.90
  -1   7 -13   14.99    7.19
   1  -7  14    5.14    6.32
  -1  -7 -14   -1.46    7.44
   1   7  14    7.09    6.72
  -1   7 -14    3.09    5.74
   1  -8 -14    3.70    9.16
  -1  -8  14   -0.76    7.05
   1   8 -14    6.01    6.14
  -1   8  14   17.38    8.75
   1  -8 -13    9.53    9.76
  -1  -8  13  -10.61    7.75
   1   8 -13    5.60    7.97
  -1   8  13    9.33    9.52
   1  -8 -12   58.71   11.59
  -1  -8  12   75.33    9.45
   1   8 -12   63.52    8.69
  -1   8  12   59.08   10.82
   1  -8 -11  186.10   15.21
  -1  -8  11  174.30   12.44
   1   8 -11  171.10   12.90
  -1   8  11  146.40   12.73
   1  -8 -10   85.88   12.40
  -1  -8  10  106.90   10.09
   1   8 -10  124.70   11.02
  -1   8  10   91.83   11.27
   1  -8  -9   16.51   10.45
  -1  -8   9   10.25    8.26
   1   8  -9   18.90    9.56
  -1   8   9   32.54    9.36
   1  -8  -8   27.98   11.06
  -1  -8   8   45.87    9.35
   1   8  -8   60.90    9.68
  -1   8   8   54.88   10.76
   1  -8  -7  741.90   39.29
  -1  -8   7  753.90   39.30
   1   8  -7  764.20   39.94
  -1   8   7  703.50   37.43
   1  -8  -6  711.80   37.78
  -1  -8   6  710.90   37.22
   1   8  -6  786.90   41.24
  -1   8   6  771.30   40.80
   1   8  -5  671.30   35.49
  -1   8   5  691.40   37.30
   1  -8  -4   76.43   11.57
  -1  -8   4   50.12    8.78
   1   8  -4   51.09   10.16
  -1   8   4   45.83    8.82
   1  -8  -3    4.64    9.31
  -1  -8   3   16.37    9.15
  -1  -8   3   11.44    9.09
   1   8  -3    3.88    9.07
  -1   8   3   25.10   11.09
   1  -8  -2 1644.00   82.11
  -1  -8   2 1653.00   82.43
  -1  -8   2 1733.00   86.19
  -1   8   2 1688.00   84.50
   1  -8  -1  759.50   40.05
  -1  -8   1  722.00   37.81
   1   8  -1  683.70   36.19
  -1   8   1  721.50   38.73
   1  -8   0 1101.00   56.25
  -1  -8   0 1038.00   52.70
   1   8   0 1077.00   55.24
  -1   8   0 1059.00   54.45
   1  -8   1  227.60   16.52
  -1  -8  -1  245.50   16.15
   1   8   1  212.00   16.60
  -1   8  -1  209.50   15.77
   1  -8   2  269.10   17.87
   1  -8   2  221.80   15.83
  -1  -8  -2  231.60   15.75
   1   8   2  196.00   14.96
   1  -8   3    7.19    9.27
   1  -8   3    0.35    9.21
  -1  -8  -3   13.79    8.57
   1   8   3   -3.99    8.90
  -1   8  -3    5.86    8.34
   1  -8   4  134.90   11.72
   1  -8   4  146.50   12.40
  -1  -8  -4  135.00   12.16
   1   8   4  147.80   12.27
  -1   8  -4  127.20   12.49
   1  -8   5  114.90   11.40
  -1  -8  -5  107.40   11.69
   1   8   5  107.60   12.56
  -1   8  -5  110.60   11.72
   1  -8   6   91.33   11.46
  -1  -8  -6   92.88   11.52
   1   8   6   56.64   10.70
  -1   8  -6   70.15   10.32
   1  -8   7  250.20   16.31
  -1  -8  -7  209.30   15.77
   1   8   7  213.50   15.64
  -1   8  -7  209.70   14.72
   1  -8   8  217.60   14.45
  -1  -8  -8  244.40   17.10
   1   8   8  220.50   15.89
  -1   8  -8  223.40   14.85
   1  -8   9   42.68    8.69
  -1  -8  -9   27.73   10.55
   1   8   9   33.17   10.05
  -1   8  -9   46.75    8.74
   1  -8  10  104.20   10.39
  -1  -8 -10  107.00   12.44
   1   8  10  109.30   12.60
  -1   8 -10  118.20   10.70
   1  -8  11   12.33    8.69
  -1  -8 -11   -7.26   10.22
   1   8  11    3.92    8.69
  -1   8 -11    3.70    7.69
   1  -8  12    4.93    7.42
  -1  -8 -12    7.61    9.41
   1   8  12    0.89    8.41
  -1   8 -12   22.12    7.65
   1  -8  13   15.13    7.16
  -1  -8 -13   11.70    9.61
   1   8  13   13.66    7.84
  -1   8 -13    7.64    6.83
   1  -8  14   -5.34    6.68
  -1  -8 -14   11.57    8.08
   1   8  14    8.38    8.62
  -1   8 -14   -4.93    5.71
   1  -9 -14   18.49    8.50
  -1  -9  14   30.72    6.67
   1   9 -14   23.59    6.23
  -1   9  14   18.05    8.84
   1  -9 -13   21.82   10.28
  -1  -9  13    2.37    7.23
   1   9 -13   -3.87    7.02
  -1   9  13   14.85   10.30
   1  -9 -12   -1.18   10.36
  -1  -9  12   -0.97    8.10
   1   9 -12   -8.58    7.22
  -1   9  12   -2.42    9.34
   1  -9 -11   14.81   10.31
  -1  -9  11   15.02    7.99
   1   9 -11    2.46    8.59
  -1   9  11   16.48   10.89
   1  -9 -10   82.57   12.82
  -1  -9  10  103.80   10.02
   1   9 -10  116.50   11.27
  -1   9  10  112.40   12.86
   1  -9  -9  169.00   14.51
  -1  -9   9  166.60   12.96
   1   9  -9  174.80   13.73
  -1   9   9  150.30   13.16
   1  -9  -8  245.90   17.29
  -1  -9   8  265.50   17.23
   1   9  -8  284.60   17.60
  -1   9   8  283.90   18.93
   1  -9  -7  453.30   25.92
  -1  -9   7  473.60   26.11
   1   9  -7  500.00   27.31
  -1   9   7  462.60   26.71
   1  -9  -6  250.30   17.37
  -1  -9   6  263.90   16.90
   1   9  -6  252.30   16.59
  -1   9   6  270.20   18.48
   1  -9  -5    5.09    9.88
  -1  -9   5   -3.51    8.39
   1   9  -5    5.02    9.09
  -1   9   5    7.82   10.67
   1  -9  -4  824.10   42.98
  -1  -9   4  847.40   43.55
   1   9  -4  770.00   40.19
  -1   9   4  771.10   40.16
   1  -9  -3   72.30   11.42
  -1  -9   3   63.76   10.29
  -1  -9   3   59.83   10.27
   1   9  -3   51.01    9.15
  -1   9   3   60.86   11.06
   1  -9  -2   68.20   10.87
  -1  -9   2   98.00   11.05
  -1  -9   2   84.38   10.39
  -1   9   2   85.37   10.76
   1  -9  -1 4295.00  210.60
  -1  -9   1 4618.00  226.30
   1   9  -1 4372.00  214.40
  -1   9   1 4210.00  206.70
   1  -9   0 1249.00   63.13
  -1  -9   0 1270.00   63.72
   1   9   0 1276.00   64.50
  -1   9   0 1253.00   63.84
   1  -9   1  110.80   12.06
  -1  -9  -1  103.10   10.66
   1   9   1   89.64   11.71
  -1   9  -1   99.09   12.92
   1  -9   2  649.00   34.64
   1  -9   2  581.00   30.76
  -1  -9  -2  561.80   29.89
   1   9   2  576.30   30.93
   1  -9   3   27.98    9.65
   1  -9   3    6.64    9.69
  -1  -9  -3   -7.39    8.81
   1   9   3  -11.61    9.82
   1  -9   4  626.50   33.32
   1  -9   4  608.30   32.54
  -1  -9  -4  581.20   31.44
   1   9   4  533.40   28.78
  -1   9  -4  567.20   30.70
   1  -9   5  569.40   30.58
  -1  -9  -5  533.00   29.21
   1   9   5  516.90   28.88
  -1   9  -5  560.40   30.63
   1  -9   6   81.54   11.11
  -1  -9  -6   94.28   11.79
   1   9   6   89.83   11.59
  -1   9  -6   96.83   11.53
   1  -9   7  168.20   12.72
  -1  -9  -7  184.80   15.27
   1   9   7  199.90   15.22
  -1   9  -7  184.70   14.20
   1  -9   8   58.38    8.92
  -1  -9  -8   39.27   11.03
   1   9   8   47.33   10.90
  -1   9  -8   32.74    8.85
   1  -9   9   15.71    8.07
  -1  -9  -9   11.14   10.88
   1   9   9   21.46   10.62
  -1   9  -9   -3.40    7.96
   1  -9  10   73.57    9.16
  -1  -9 -10   70.67   11.44
   1   9  10   70.87   11.79
  -1   9 -10   70.22    9.59
   1  -9  11   44.88    9.03
  -1  -9 -11   47.04   11.14
   1   9  11   22.38    9.62
  -1   9 -11   43.26    8.62
   1  -9  12    8.76    7.51
  -1  -9 -12    9.98    9.39
   1   9  12    0.05   10.11
  -1   9 -12    3.73    7.59
   1  -9  13    6.21    7.37
  -1  -9 -13   14.68    9.35
   1   9  13    8.66    9.88
  -1   9 -13    5.21    7.14
   1 -10 -14   19.01    9.00
  -1 -10  14   -4.40    6.58
   1  10 -14    5.74    5.84
  -1  10  14    6.76    8.75
   1 -10 -13   -3.93    9.84
  -1 -10  13   14.81    7.30
   1  10 -13   -1.86    6.83
  -1  10  13    3.92    9.33
   1 -10 -12    5.57   10.48
  -1 -10  12    5.32    8.04
   1  10 -12   11.56    7.10
  -1  10  12   -6.79   10.68
   1 -10 -11   67.21   11.64
  -1 -10  11   75.24    9.24
   1  10 -11   87.78    9.61
  -1  10  11   82.30   12.49
   1 -10 -10  277.10   18.74
  -1 -10  10  287.10   17.35
   1  10 -10  264.70   16.49
  -1  10  10  280.30   19.61
   1 -10  -9  117.50   12.90
  -1 -10   9  105.70   10.90
   1  10  -9   98.08   10.42
  -1  10   9  123.30   13.46
   1 -10  -8   45.73   10.79
  -1 -10   8   42.75    8.90
   1  10  -8   24.97    8.72
  -1  10   8   19.99   10.94
   1 -10  -7  131.20   13.13
  -1 -10   7  134.10   11.56
   1  10  -7  138.80   12.34
  -1  10   7  154.00   14.41
   1 -10  -6   81.10   11.98
  -1 -10   6   74.87   10.41
   1  10  -6   81.71   10.85
  -1  10   6   67.50   10.67
   1 -10  -5   42.63   10.62
  -1 -10   5   45.47    8.67
   1  10  -5   72.28   10.83
  -1  10   5   54.33   12.12
   1 -10  -4  364.00   21.69
  -1 -10   4  406.10   23.09
  -1 -10   4  384.50   22.27
   1  10  -4  375.80   22.36
  -1  10   4  368.00   22.75
   1 -10  -3 1133.00   57.66
  -1 -10   3 1132.00   57.35
  -1 -10   3 1127.00   57.08
  -1  10   3 1063.00   54.20
   1 -10  -2  139.80   13.03
  -1 -10   2  150.50   12.93
  -1 -10   2  128.40   11.85
  -1  10   2  120.60   11.89
   1 -10  -1 1352.00   67.93
  -1 -10   1 1435.00   71.86
   1  10  -1 1415.00   71.15
  -1  10   1 1347.00   68.38
   1 -10   0   95.31   11.49
  -1 -10   0  114.20   11.38
   1  10   0   91.07   11.25
  -1  10   0   90.59   13.01
   1 -10   1  267.70   17.75
  -1 -10  -1  234.90   15.49
   1  10   1  239.30   16.13
  -1  10  -1  225.60   16.41
   1 -10   2   91.81   11.65
   1 -10   2   95.42   12.67
  -1 -10  -2   82.06    9.51
   1  10   2   90.25   10.74
  -1  10  -2   65.87   10.37
   1 -10   3   20.69    9.71
   1 -10   3    9.46    9.86
  -1 -10  -3   25.49    8.26
   1  10   3   13.96    8.82
   1 -10   4  592.50   31.56
   1 -10   4  633.00   33.93
  -1 -10  -4  647.40   34.50
   1  10   4  569.70   31.52
   1 -10   5   42.91    9.07
   1 -10   5   40.46    9.93
  -1 -10  -5   31.51   10.23
   1  10   5   13.45   10.06
  -1  10  -5   36.02   10.03
   1 -10   6   38.23   10.35
  -1 -10  -6    7.02    9.82
   1  10   6   32.29   10.27
  -1  10  -6   22.93    9.72
   1 -10   7   85.23   10.35
  -1 -10  -7   68.55   12.17
   1  10   7   43.49   10.46
  -1  10  -7   66.35   10.82
   1 -10   8   38.59    8.19
  -1 -10  -8   51.96   11.29
   1  10   8   43.43   11.93
  -1  10  -8   48.07    9.54
   1 -10   9    9.58    8.47
  -1 -10  -9    2.22   10.91
   1  10   9   -2.07   10.84
  -1  10  -9    6.75    8.49
   1 -10  10  158.40   12.10
  -1 -10 -10  146.50   13.67
   1  10  10  127.30   14.26
  -1  10 -10  143.00   12.06
   1 -10  11   47.48    8.03
  -1 -10 -11   35.42   10.84
   1  10  11   35.56   11.21
  -1  10 -11   50.15    8.76
   1 -10  12    3.45    7.95
  -1 -10 -12    4.13   10.55
   1  10  12   24.18    9.87
  -1  10 -12   15.44    7.66
   1 -10  13   -5.82    6.99
  -1 -10 -13   -7.83    9.11
   1  10  13   -1.02    9.51
  -1  10 -13   -5.35    7.07
   1 -11 -14   13.60    9.11
  -1 -11  14   23.81    7.02
   1  11 -14   13.58    6.18
  -1  11  14   12.73    8.61
   1 -11 -13    2.77   10.31
  -1 -11  13    0.68    7.19
   1  11 -13   -0.47    6.97
  -1  11  13    1.10    9.44
   1 -11 -12   28.61   10.44
  -1 -11  12   13.96    7.99
   1  11 -12   11.83    7.18
  -1  11  12    9.21   10.85
   1 -11 -11   12.29   10.98
  -1 -11  11    1.34    7.63
   1  11 -11   19.67    7.84
  -1  11  11   15.17   11.69
   1 -11 -10   -2.93   10.78
  -1 -11  10    3.57    8.48
   1  11 -10   17.95    7.95
  -1  11  10   -4.43   10.99
   1 -11  -9  291.30   19.27
  -1 -11   9  309.50   18.95
   1  11  -9  283.40   17.55
  -1  11   9  311.50   20.37
   1 -11  -8   68.85   11.47
  -1 -11   8   63.34    9.21
   1  11  -8   48.00   10.10
  -1  11   8   41.02   10.57
   1 -11  -7   55.22   11.25
  -1 -11   7   71.39   10.37
   1  11  -7   77.36   10.88
  -1  11   7   53.72   10.15
   1 -11  -6  317.20   19.92
  -1 -11   6  357.20   21.06
   1  11  -6  347.80   21.00
  -1  11   6  326.90   20.91
   1 -11  -5  216.40   16.88
  -1 -11   5  212.40   14.39
  -1 -11   5  224.90   15.77
   1  11  -5  206.90   15.51
  -1  11   5  205.40   16.01
   1 -11  -4  530.40   28.96
  -1 -11   4  552.40   29.94
  -1 -11   4  593.10   31.70
  -1  11   4  553.30   30.96
   1 -11  -3  203.10   15.35
  -1 -11   3  203.40   14.62
  -1 -11   3  238.20   16.22
  -1  11   3  227.50   16.89
   1 -11  -2  668.30   35.62
  -1 -11   2  667.00   35.22
  -1 -11   2  655.30   34.90
  -1  11   2  643.60   34.59
   1 -11  -1 2503.00  123.70
  -1 -11   1 2574.00  127.00
   1  11  -1 2592.00  128.20
  -1  11   1 2573.00  127.20
   1 -11   0 3526.00  173.30
  -1 -11   0 3517.00  172.80
   1  11   0 3599.00  176.80
  -1  11   0 3486.00  171.70
   1 -11   1  -15.71   11.17
  -1 -11  -1   10.07    8.64
   1  11   1    4.28   10.12
  -1  11  -1    7.79   10.51
   1 -11   2   20.59   10.56
   1 -11   2    6.05   10.29
  -1 -11  -2   19.50    9.06
   1  11   2   22.03    9.85
  -1  11  -2    0.65   10.55
   1 -11   3   10.37    9.13
   1 -11   3    0.54    9.15
  -1 -11  -3    3.06    9.53
   1  11   3  -10.16    9.68
   1 -11   4   31.09    9.44
   1 -11   4   11.34    8.84
  -1 -11  -4   11.56    9.42
   1  11   4   16.43   10.68
   1 -11   5  776.60   40.84
   1 -11   5  739.40   38.72
  -1 -11  -5  847.30   44.07
   1  11   5  829.20   43.49
  -1  11  -5  741.10   39.11
   1 -11   6    8.97    8.30
   1 -11   6    1.73    9.46
  -1 -11  -6    1.87   10.11
   1  11   6    6.62    9.58
  -1  11  -6    6.06    9.57
   1 -11   7  -12.86    8.91
  -1 -11  -7   10.49   11.57
   1  11   7    6.36    8.77
  -1  11  -7   21.28    8.96
   1 -11   8  282.20   17.13
  -1 -11  -8  287.50   19.35
   1  11   8  271.60   18.01
  -1  11  -8  317.40   19.42
   1 -11   9    5.20    7.98
  -1 -11  -9   -1.86   10.77
   1  11   9    8.34   10.81
  -1  11  -9    2.28    8.89
   1 -11  10   96.24    9.79
  -1 -11 -10   77.06   12.89
   1  11  10  115.70   12.97
  -1  11 -10   76.93   10.02
   1 -11  11   38.62    8.28
  -1 -11 -11   71.86   11.53
   1  11  11   58.14   10.63
  -1  11 -11   60.00    9.16
   1 -11  12    5.13    8.00
  -1 -11 -12    1.96   10.45
   1  11  12    2.03    9.29
  -1  11 -12   11.11    7.86
   1 -11  13   33.87    7.29
  -1 -11 -13   24.87    8.24
   1  11  13   29.03   10.57
  -1  11 -13   38.09    7.27
   1 -12 -14   -9.17    8.91
  -1 -12  14   -6.78    5.84
   1  12 -14  -11.33    6.29
  -1  12  14    0.92    7.29
   1 -12 -13   -1.24   10.03
  -1 -12  13    1.42    7.20
   1  12 -13    1.38    6.88
  -1  12  13   -4.05    7.94
   1 -12 -12   11.16   10.26
  -1 -12  12    5.97    7.01
   1  12 -12   10.05    7.16
  -1  12  12    2.25    9.63
   1 -12 -11   86.38   12.58
  -1 -12  11   82.74    9.73
   1 -12 -10   90.50   12.48
  -1 -12  10   80.87   10.06
   1  12 -10   81.43    9.37
  -1  12  10   81.86   11.77
   1 -12  -9  119.20   13.39
  -1 -12   9  100.70   10.68
   1 -12  -8  258.30   18.07
  -1 -12   8  285.90   17.77
   1  12  -8  250.00   16.83
  -1  12   8  237.20   17.01
   1 -12  -7   41.30   11.18
  -1 -12   7   43.49    9.52
   1  12  -7   39.81   10.13
  -1  12   7   42.08   10.36
   1 -12  -6   51.79   11.11
  -1 -12   6   61.44    9.59
  -1 -12   6   61.63   10.42
   1  12  -6   65.64   10.53
  -1  12   6   59.77   11.52
   1 -12  -5   16.94   10.49
  -1 -12   5   19.73    8.29
  -1 -12   5    9.49    9.56
   1  12  -5   17.07    9.94
  -1  12   5   12.37   10.53
   1 -12  -4  416.00   24.14
  -1 -12   4  400.50   23.07
  -1 -12   4  437.60   24.59
  -1  12   4  421.60   24.79
   1 -12  -3  590.90   31.96
  -1 -12   3  574.00   30.99
  -1 -12   3  639.40   33.93
  -1  12   3  580.00   31.73
   1 -12  -2 1624.00   81.09
  -1 -12   2 1804.00   90.01
  -1 -12   2 1748.00   87.09
   1  12  -2 1453.00   72.92
  -1  12   2 1657.00   83.08
   1 -12  -1 1237.00   62.62
  -1 -12   1 1252.00   63.16
   1  12  -1 1185.00   60.08
  -1  12   1 1253.00   63.61
   1 -12   0   22.00    8.61
  -1 -12   0   25.46    9.55
   1  12   0    4.94   11.05
  -1  12   0   -3.93   11.00
   1 -12   1  171.80   14.37
  -1 -12  -1  154.30   12.81
   1  12   1  156.10   13.78
  -1  12  -1  131.60   13.17
   1 -12   2  201.30   15.42
   1 -12   2  160.70   14.44
  -1 -12  -2  165.60   13.75
   1  12   2  176.80   14.10
  -1  12  -2  177.00   15.04
   1 -12   3  242.90   16.38
   1 -12   3  252.10   16.76
  -1 -12  -3  300.90   18.90
   1  12   3  262.80   18.49
   1 -12   4  453.30   25.37
   1 -12   4  497.40   27.70
  -1 -12  -4  485.00   26.97
   1  12   4  451.90   25.96
   1 -12   5   52.89   10.30
   1 -12   5   44.94   10.27
  -1 -12  -5   40.75   10.62
   1  12   5   24.64   10.85
   1 -12   6   58.30    9.73
   1 -12   6   60.39   10.46
  -1 -12  -6   47.24   11.04
   1  12   6   78.20   12.56
  -1  12  -6   52.32   10.68
   1 -12   7  109.00   10.98
   1 -12   7  109.10   11.27
  -1 -12  -7   89.40   12.07
   1  12   7   78.15   12.05
  -1  12  -7  113.70   11.61
   1 -12   8   42.40    8.74
   1 -12   8   40.96    8.40
  -1 -12  -8   67.91   11.99
   1  12   8   53.89    9.83
  -1  12  -8   56.69    9.58
   1 -12   9   14.27    7.64
  -1 -12  -9   -4.34   10.68
   1  12   9   15.40    8.93
  -1  12  -9  -12.27    7.94
   1 -12  10   67.52    9.15
  -1 -12 -10   69.67   12.02
   1  12  10   46.32    9.99
  -1  12 -10   64.25    9.61
   1 -12  11   21.17    8.14
  -1 -12 -11   14.63   10.36
   1  12  11   30.23    9.11
  -1  12 -11   23.60    8.26
   1 -12  12   18.90    7.41
  -1 -12 -12   42.49   10.84
   1  12  12   25.73    9.12
  -1  12 -12   17.05    7.75
   1 -12  13    6.60    5.72
   1 -12  13    4.73    6.99
  -1 -12 -13   -1.74    8.82
   1  12  13   -5.00    7.44
  -1  12 -13   -2.18    6.21
   1 -13 -13    2.56    9.22
  -1 -13  13   14.62    7.03
   1  13 -13   11.73    6.95
  -1  13  13    0.83    8.22
   1 -13 -12    0.59   10.40
  -1 -13  12    7.51    6.69
   1  13 -12   -0.71    7.15
  -1  13  12   -6.96    8.95
   1 -13 -11    5.54   10.95
  -1 -13  11   -3.02    8.08
   1  13 -11   12.93    7.40
  -1  13  11   10.96    9.80
   1 -13 -10   64.26   11.97
  -1 -13  10   76.97    9.83
   1  13 -10   88.21    9.80
  -1  13  10   69.25   11.98
   1 -13  -9  142.20   13.79
  -1 -13   9  153.70   12.60
   1  13  -9  124.90   11.11
  -1  13   9  107.10   13.03
   1 -13  -8  212.30   15.65
  -1 -13   8  196.20   14.02
   1  13  -8  200.70   14.62
  -1  13   8  234.30   17.57
   1 -13  -7  165.00   14.19
  -1 -13   7  185.20   13.81
  -1 -13   7  169.30   12.66
   1  13  -7  168.00   13.11
  -1  13   7  156.90   14.53
   1 -13  -6   24.46   11.15
  -1 -13   6   28.01    8.48
  -1 -13   6   25.63   10.09
   1  13  -6   -1.94    9.58
  -1  13   6   18.97   10.07
   1 -13  -5  597.90   32.31
  -1 -13   5  531.70   28.71
  -1 -13   5  585.60   31.85
  -1  13   5  556.10   30.86
   1 -13  -4  283.10   18.15
  -1 -13   4  332.20   20.27
  -1 -13   4  344.10   20.55
  -1  13   4  319.90   20.48
   1 -13  -3 1062.00   54.29
  -1 -13   3 1125.00   57.07
  -1 -13   3 1136.00   57.76
  -1  13   3 1134.00   58.29
   1 -13  -2   26.74   10.70
  -1 -13   2   30.47    9.88
  -1 -13   2   27.16    9.90
   1  13  -2   13.58    9.60
  -1  13   2    2.29   11.74
   1 -13  -1 1374.00   69.17
  -1 -13   1 1449.00   72.59
   1  13  -1 1398.00   70.25
  -1  13   1 1494.00   75.37
   1 -13   0 1090.00   56.01
  -1 -13   0  973.50   49.81
   1  13   0  986.50   50.56
  -1  13   0 1057.00   54.44
   1 -13   1   28.13   10.11
  -1 -13  -1   28.66    9.93
   1  13   1   22.99   10.36
  -1  13  -1   24.49   10.72
   1 -13   2   62.56   11.39
   1 -13   2   35.23   10.33
  -1 -13  -2   46.85   10.51
   1  13   2   53.88   11.70
  -1  13  -2   40.36   10.59
   1 -13   3   21.30   10.23
   1 -13   3   13.54    9.20
  -1 -13  -3   43.58   11.66
   1  13   3   23.35   10.85
   1 -13   4  439.00   25.23
   1 -13   4  401.70   23.21
  -1 -13  -4  414.70   23.75
   1  13   4  391.50   23.38
   1 -13   5  947.60   48.89
   1 -13   5  841.30   43.41
  -1 -13  -5  899.20   46.80
   1  13   5  860.30   44.78
   1 -13   6   99.63   10.98
   1 -13   6   96.20   11.28
  -1 -13  -6  111.30   13.04
   1  13   6   96.05   11.88
   1 -13   7   29.06    8.83
   1 -13   7   33.97    9.79
  -1 -13  -7   23.42   10.65
   1  13   7   40.66   11.45
  -1  13  -7   31.74    8.96
   1 -13   8   51.75    9.10
   1 -13   8   60.44    9.38
  -1 -13  -8   55.86   12.55
   1  13   8   56.09   11.75
  -1  13  -8   44.42    9.25
   1 -13   9   69.94    9.12
   1 -13   9   70.53    9.11
  -1 -13  -9   46.68   11.90
   1  13   9   63.42   11.84
  -1  13  -9   75.20    9.51
   1 -13  10   31.05    8.52
   1 -13  10   39.81    7.63
  -1 -13 -10   27.73   11.38
   1  13  10   50.06    9.89
  -1  13 -10   38.53    8.69
   1 -13  11   47.92    7.70
   1 -13  11   51.78    8.75
  -1 -13 -11   39.30   10.43
   1  13  11   52.81    9.39
  -1  13 -11   56.44    8.64
   1 -13  12    5.64    6.74
   1 -13  12   -0.50    6.50
  -1 -13 -12   -5.06   10.07
   1  13  12   24.89    9.22
  -1  13 -12    2.43    7.18
   1 -13  13   58.67    6.41
   1 -13  13   56.04    7.24
  -1 -13 -13   58.82   10.20
   1  13  13   58.66    9.57
  -1  13 -13   58.87    6.86
   1 -14 -13   12.29    9.19
  -1 -14  13   -0.05    5.66
  -1 -14  13   11.55    7.08
   1  14 -13    2.38    6.43
  -1  14  13    0.72    8.95
   1 -14 -12   -7.29   10.40
  -1 -14  12    1.95    6.70
  -1 -14  12   23.83    7.60
   1  14 -12    8.52    6.98
  -1  14  12    0.74   10.31
   1 -14 -11   41.97   10.94
  -1 -14  11   26.70    7.53
  -1 -14  11    6.35    7.53
   1  14 -11   25.41    7.70
  -1  14  11    7.07   11.11
   1 -14 -10   75.87   11.71
  -1 -14  10   78.76    8.65
  -1 -14  10   81.89    9.68
   1  14 -10   80.49    9.86
  -1  14  10   81.68   12.66
   1 -14  -9   14.04   10.34
  -1 -14   9    7.65    8.14
  -1 -14   9   11.39    7.62
   1  14  -9   -0.53    8.08
  -1  14   9   30.04   11.88
   1 -14  -8   35.14   10.73
  -1 -14   8   43.54    8.96
  -1 -14   8   48.70    9.02
   1  14  -8   26.79    9.11
  -1  14   8   41.26   11.88
   1 -14  -7  147.80   13.69
  -1 -14   7  163.90   13.34
  -1 -14   7  148.00   12.40
   1  14  -7  156.50   13.06
  -1  14   7  149.00   14.40
   1 -14  -6   88.79   12.01
  -1 -14   6   71.86   10.69
  -1 -14   6   67.41    9.72
  -1  14   6   67.21   12.37
   1 -14  -5  144.80   13.54
  -1 -14   5  174.60   12.97
  -1 -14   5  178.50   13.98
  -1  14   5  162.90   14.39
   1 -14  -4  704.10   37.44
  -1 -14   4  662.20   35.45
  -1 -14   4  630.20   33.70
  -1  14   4  659.00   35.71
   1 -14  -3   12.39    8.98
  -1 -14   3   32.11   11.21
  -1 -14   3   26.07    9.36
  -1  14   3   10.28   12.36
   1 -14  -2  504.90   28.12
  -1 -14   2  517.40   28.47
  -1 -14   2  546.90   29.99
   1  14  -2  539.80   29.51
  -1  14   2  513.90   29.24
   1 -14  -1  381.40   22.66
  -1 -14   1  385.70   22.69
   1  14  -1  369.30   21.98
  -1  14   1  403.90   24.29
   1 -14   0   27.25   10.61
  -1 -14   0   36.64   10.32
   1  14   0   34.40   10.80
  -1  14   0   34.78   11.54
   1 -14   1   46.45   10.60
  -1 -14  -1   44.19   10.24
   1  14   1   26.50   11.56
  -1  14  -1   24.85   10.37
   1 -14   2  101.80   10.85
   1 -14   2  120.20   12.93
  -1 -14  -2  106.30   12.87
   1  14   2   83.57   12.14
  -1  14  -2   84.20   11.01
   1 -14   3  102.50   12.04
   1 -14   3  106.40   11.75
  -1 -14  -3   97.26   11.90
   1  14   3  103.40   12.74
   1 -14   4  803.00   41.92
   1 -14   4  786.70   40.89
  -1 -14  -4  762.80   40.12
   1  14   4  847.90   44.19
   1 -14   5   22.22    9.03
   1 -14   5    0.71    9.82
  -1 -14  -5   24.36   10.36
   1  14   5    5.11    9.81
   1 -14   6  258.90   16.99
   1 -14   6  228.70   15.24
  -1 -14  -6  250.90   17.48
   1  14   6  236.40   17.06
   1 -14   7   52.69    9.60
   1 -14   7   41.09    8.44
  -1 -14  -7   50.17   11.25
   1  14   7   34.83   11.00
   1 -14   8    0.37    9.22
   1 -14   8  -10.89    7.61
  -1 -14  -8   -7.93   11.00
   1  14   8    9.04   11.61
  -1  14  -8    8.91    7.98
   1 -14   9   55.22    8.82
   1 -14   9   35.80    8.21
  -1 -14  -9   62.45   11.59
   1  14   9   59.78   12.14
  -1  14  -9   39.99    8.69
   1 -14  10   27.50    8.05
   1 -14  10    5.28    7.07
  -1 -14 -10   25.61   11.14
   1  14  10   30.41    9.39
  -1  14 -10   17.53    7.55
   1 -14  11    7.51    7.48
   1 -14  11   27.04    7.27
  -1 -14 -11   19.18   11.55
   1  14  11   20.15    9.73
  -1  14 -11   15.95    7.22
   1 -14  12   59.12    7.86
   1 -14  12   65.95    8.19
  -1 -14 -12   73.92   12.07
   1  14  12   59.13   10.35
  -1  14 -12   68.50    8.30
   1 -14  13   -5.79    4.68
   1 -14  13  -12.59    6.16
  -1 -14 -13    0.30    9.38
   1  14  13   -5.12    8.79
  -1  14 -13   -0.21    5.48
   1 -15 -13   -0.83    8.60
  -1 -15  13    2.84    6.52
  -1 -15  13    2.15    6.15
   1  15 -13    3.86    5.98
  -1  15  13   -1.09    8.65
   1 -15 -12    4.03   10.34
  -1 -15  12   -9.17    6.41
  -1 -15  12    5.00    6.93
   1  15 -12    5.43    6.61
  -1  15  12   11.97    9.79
   1 -15 -11    1.48   10.48
  -1 -15  11    2.54    7.13
  -1 -15  11   13.72    7.20
   1  15 -11   19.08    7.45
  -1  15  11   10.66   10.25
   1 -15 -10   36.91   11.13
  -1 -15  10   46.11    8.15
  -1 -15  10   42.26    7.65
   1  15 -10   52.30    8.70
  -1  15  10   42.97   11.39
   1 -15  -9  148.70   13.95
  -1 -15   9  149.30   11.87
  -1 -15   9  143.90   11.32
   1  15  -9  172.00   12.68
  -1  15   9  168.00   16.23
   1 -15  -8   73.29   11.12
  -1 -15   8   67.02    9.02
  -1 -15   8   52.75    9.66
   1  15  -8   31.29    8.94
  -1  15   8   66.82   12.26
   1 -15  -7   16.16   10.67
  -1 -15   7   11.30    8.37
  -1 -15   7    9.42    8.41
  -1  15   7   16.39   12.15
   1 -15  -6  274.00   18.69
  -1 -15   6  258.50   16.42
  -1 -15   6  291.40   17.84
  -1  15   6  284.20   18.99
   1 -15  -5   -5.50   10.03
  -1 -15   5   20.71    9.64
  -1 -15   5    5.80    8.44
  -1  15   5   -6.03   11.03
   1 -15  -4  381.40   22.61
  -1 -15   4  339.30   20.83
  -1 -15   4  359.10   21.32
  -1  15   4  349.40   22.13
   1 -15  -3  416.50   23.98
  -1 -15   3  446.90   25.27
  -1 -15   3  433.70   24.84
  -1  15   3  420.50   25.31
   1 -15  -2    1.80    9.98
  -1 -15   2    4.01    8.99
  -1 -15   2   13.98   10.30
   1  15  -2    0.36    8.90
  -1  15   2   -1.29   11.42
   1 -15  -1 1246.00   63.13
  -1 -15   1 1235.00   62.50
   1  15  -1 1280.00   64.94
  -1  15   1 1293.00   65.60
   1 -15   0  486.50   27.49
  -1 -15   0  517.50   28.61
   1  15   0  484.90   27.69
  -1  15   0  480.30   27.11
   1 -15   1  143.20   12.95
  -1 -15  -1  105.60   10.95
   1  15   1  142.50   14.19
  -1  15  -1  122.30   12.81
   1 -15   2   28.92   11.07
   1 -15   2   18.06    9.89
  -1 -15  -2    5.28   10.10
   1  15   2   17.25   10.91
  -1  15  -2    4.80    9.95
   1 -15   3    6.72   10.06
   1 -15   3    8.46    9.45
  -1 -15  -3    6.70   10.29
   1  15   3   16.69   10.41
   1 -15   4  108.20   11.05
   1 -15   4  124.00   12.35
  -1 -15  -4  115.80   11.51
   1  15   4   93.79   11.89
   1 -15   5 1320.00   66.45
   1 -15   5 1289.00   65.15
  -1 -15  -5 1466.00   74.29
   1  15   5 1392.00   70.14
   1 -15   6    2.85    8.62
   1 -15   6    0.18    8.29
  -1 -15  -6    1.16   10.72
   1  15   6   -5.39   10.14
   1 -15   7    3.82    8.29
   1 -15   7  -10.05    8.43
  -1 -15  -7    9.31    9.87
   1  15   7   12.98   10.28
   1 -15   8   -9.43    8.89
   1 -15   8   -0.56    7.74
  -1 -15  -8   31.80   11.72
   1  15   8    8.24   11.37
   1 -15   9   72.48    8.83
   1 -15   9   98.98    9.83
  -1 -15  -9   74.00   11.50
   1  15   9   42.32    9.95
   1 -15  10    5.82    7.32
   1 -15  10   14.36    7.16
  -1 -15 -10   18.51   11.57
   1  15  10   26.03    8.94
  -1  15 -10   21.84    7.18
   1 -15  11   75.38    8.54
   1 -15  11   71.06    8.69
  -1 -15 -11   87.69   12.29
   1  15  11   71.80   10.88
  -1  15 -11   79.19    8.73
   1 -15  12    9.74    6.56
   1 -15  12    0.88    6.56
  -1 -15 -12  -20.05   10.13
   1  15  12   -6.07   10.06
  -1  15 -12    1.64    6.68
   1 -16 -13   12.82    9.03
  -1 -16  13    2.74    5.45
  -1 -16  13   20.40    6.49
   1  16 -13   17.78    5.81
  -1  16  13   -2.16    8.94
   1 -16 -12  -17.82    9.77
  -1 -16  12   12.52    6.92
  -1 -16  12   -4.18    6.57
   1  16 -12    4.21    6.56
  -1  16  12    9.92    9.26
   1 -16 -11   26.29   10.65
  -1 -16  11    6.16    7.70
  -1 -16  11    2.51    6.88
   1 -16 -10  180.00   14.85
  -1 -16  10  179.40   12.44
  -1 -16  10  183.00   12.48
   1  16 -10  171.90   12.29
  -1  16  10  194.50   16.62
   1 -16  -9   16.01   10.33
  -1 -16   9   -7.48    7.47
  -1 -16   9   15.55    7.20
   1  16  -9   13.07    7.36
  -1  16   9   27.61   12.64
   1 -16  -8    4.02    9.74
  -1 -16   8   -6.13    7.66
  -1 -16   8   -6.85    8.34
  -1  16   8  -15.37   12.20
   1 -16  -7    4.24   10.40
  -1 -16   7    0.35    7.81
  -1 -16   7  -10.96    8.10
  -1  16   7  -13.76   10.90
   1 -16  -6   -5.95   10.21
  -1 -16   6   15.63    8.28
  -1 -16   6    0.46    8.51
  -1  16   6   -7.31   10.39
   1 -16  -5  240.70   17.03
  -1 -16   5  235.90   15.83
  -1 -16   5  227.90   15.68
  -1  16   5  226.10   15.61
   1 -16  -4  374.40   22.90
  -1 -16   4  351.50   21.74
  -1 -16   4  339.50   20.37
  -1  16   4  337.20   20.32
   1 -16  -3  446.10   25.07
  -1 -16   3  416.60   24.14
  -1 -16   3  418.20   24.14
  -1  16   3  418.90   24.98
   1 -16  -2  558.30   30.97
  -1 -16   2  505.70   27.94
  -1 -16   2  565.80   31.06
   1  16  -2  503.10   28.04
  -1  16   2  592.60   33.28
   1 -16  -1  501.90   28.26
  -1 -16   1  497.40   27.98
   1  16  -1  470.00   26.60
  -1  16   1  497.70   28.56
   1 -16   0    0.47   10.30
  -1 -16   0    6.02   10.14
   1  16   0    4.61    9.11
  -1  16   0   10.21   10.57
   1 -16   1   -3.26   10.40
  -1 -16  -1    9.62    9.56
   1  16   1    6.09   11.00
  -1  16  -1   -8.73    9.86
   1 -16   2   -3.42   10.77
   1 -16   2   22.91   10.10
  -1 -16  -2   -7.45   10.01
   1  16   2   -5.37   10.88
  -1  16  -2    7.82    9.84
   1 -16   3    6.61   10.29
   1 -16   3   14.44    9.74
  -1 -16  -3   14.02   10.12
   1  16   3   22.23   11.36
   1 -16   4  739.70   39.10
   1 -16   4  699.60   37.07
  -1 -16  -4  706.80   37.47
   1  16   4  719.40   38.02
   1 -16   5   15.10    8.61
   1 -16   5    6.30    8.44
  -1 -16  -5   -0.07   10.43
   1  16   5    8.74   10.18
   1 -16   6  108.40   11.69
   1 -16   6   94.47   10.01
  -1 -16  -6   93.16   12.26
   1  16   6   89.99   12.66
   1 -16   7  116.70   10.96
   1 -16   7  128.20   11.47
  -1 -16  -7  103.90   12.22
   1  16   7   95.69   12.32
   1 -16   8    2.43    7.99
   1 -16   8    2.82    8.73
  -1 -16  -8   -2.31   10.18
   1  16   8    7.00   11.65
   1 -16   9   47.32    7.92
   1 -16   9   46.03    8.08
  -1 -16  -9   41.91   11.27
   1  16   9   31.27    9.72
   1 -16  10   14.19    6.96
   1 -16  10   20.43    7.46
  -1 -16 -10   -6.83   10.46
   1  16  10    9.39    9.67
   1 -16  11    7.97    6.57
   1 -16  11   24.84    8.28
  -1 -16 -11   12.81   10.86
   1  16  11   -3.27   10.43
   1 -16  12   67.30    7.29
   1 -16  12   78.59    7.66
  -1 -16 -12   68.64   10.16
   1  16  12   73.18   10.83
   1 -17 -13   17.65    9.21
  -1 -17  13   -0.97    5.80
  -1 -17  13   11.87    5.33
   1  17 -13    5.30    5.11
  -1  17  13   -1.28    9.31
   1 -17 -12    0.28    9.56
  -1 -17  12    6.06    7.05
  -1 -17  12   -3.95    6.69
   1  17 -12    1.43    5.87
  -1  17  12    3.99   10.01
   1 -17 -11    8.30   10.34
  -1 -17  11    5.08    7.86
  -1 -17  11    9.11    6.87
   1  17 -11   17.68    7.36
  -1  17  11   23.91   10.80
   1 -17 -10  -12.73    9.94
  -1 -17  10    7.96    7.24
  -1 -17  10    1.02    7.04
  -1  17  10   -2.50   11.22
   1 -17  -9  184.30   14.42
  -1 -17   9  196.70   13.08
  -1 -17   9  213.40   14.18
  -1  17   9  202.90   16.81
   1 -17  -8   72.29   11.38
  -1 -17   8   65.97    9.22
  -1 -17   8   83.06    9.97
  -1  17   8   71.94   12.24
   1 -17  -7   26.73   10.65
  -1 -17   7   22.46    8.26
  -1 -17   7    3.34    8.54
  -1  17   7   56.06   12.01
   1 -17  -6  299.70   19.19
  -1 -17   6  307.90   18.67
  -1 -17   6  334.50   20.19
  -1  17   6  369.10   23.12
   1 -17  -5   82.41   10.79
  -1 -17   5   68.71   10.45
  -1 -17   5   79.95    9.96
  -1  17   5   69.91   12.12
   1 -17  -4   12.54   10.65
  -1 -17   4    4.65    9.46
  -1 -17   4    6.97   10.81
  -1  17   4   12.95   10.73
   1 -17  -3  377.40   22.36
  -1 -17   3  411.20   23.68
  -1 -17   3  438.70   25.07
  -1  17   3  383.80   22.71
   1 -17  -2  389.90   23.01
  -1 -17   2  402.80   23.66
  -1 -17   2  377.50   22.21
   1  17  -2  392.40   23.53
  -1  17   2  429.30   25.67
   1 -17  -1  976.60   50.20
  -1 -17   1 1009.00   51.76
   1  17  -1 1075.00   55.52
  -1  17   1 1061.00   55.12
   1 -17   0  367.10   22.35
  -1 -17   0  370.90   22.18
   1  17   0  305.20   19.30
  -1  17   0  343.70   21.45
   1 -17   1   88.43   12.06
  -1 -17  -1   63.26   10.58
   1  17   1   79.57   12.97
  -1  17  -1   85.75   12.51
   1 -17   2   10.75    9.68
   1 -17   2   13.08    9.53
  -1 -17  -2    3.86    9.80
   1  17   2   11.52   11.17
  -1  17  -2  -13.57    9.71
   1 -17   3   76.25   11.95
   1 -17   3   92.51   11.29
  -1 -17  -3   76.93   12.54
   1  17   3   67.40   11.30
   1 -17   4  104.10   11.63
   1 -17   4   91.69   11.30
  -1 -17  -4   93.21   11.65
   1  17   4  113.00   12.24
   1 -17   5  457.60   25.61
   1 -17   5  469.30   26.29
  -1 -17  -5  506.80   28.50
   1  17   5  497.40   27.95
   1 -17   6  288.30   17.44
   1 -17   6  285.30   17.56
  -1 -17  -6  260.10   18.05
   1  17   6  285.00   19.13
   1 -17   7  166.60   12.84
   1 -17   7  150.50   11.68
  -1 -17  -7  155.10   14.15
   1  17   7  161.40   14.79
   1 -17   8   28.14    8.06
   1 -17   8   38.24    8.17
  -1 -17  -8   31.22   10.37
   1  17   8   43.08    9.61
   1 -17   9   68.21    8.73
   1 -17   9   49.68    7.86
  -1 -17  -9   41.73   11.45
   1  17   9   31.58    9.16
   1 -17  10    2.83    7.17
   1 -17  10    9.86    7.06
  -1 -17 -10   18.33   10.68
   1  17  10    1.35    9.29
   1 -17  11  100.80    9.17
   1 -17  11   99.70    9.64
  -1 -17 -11  108.00   12.45
   1  17  11   96.84   11.82
   1 -17  12   -1.54    5.83
   1 -17  12   10.77    6.62
  -1 -17 -12   -5.07    9.14
   1  17  12   17.97    9.60
   1 -18 -12   -1.04    9.09
  -1 -18  12   15.36    6.37
  -1 -18  12   -0.65    6.39
  -1  18  12   -3.29    9.06
   1 -18 -11   -2.27   10.54
  -1 -18  11    4.26    6.48
  -1 -18  11   -1.63    7.07
  -1  18  11   -5.19   10.26
   1 -18 -10   91.96   11.90
  -1 -18  10   81.93    8.83
  -1 -18  10   65.63    8.52
  -1  18  10   64.53   11.65
   1 -18  -9   18.76   10.07
  -1 -18   9   24.47    8.01
  -1 -18   9   20.74    8.07
  -1  18   9   26.96   11.40
   1 -18  -8  129.00   13.15
  -1 -18   8  122.80   10.98
  -1 -18   8  122.60   10.82
  -1  18   8  123.20   13.62
   1 -18  -7  269.70   18.50
  -1 -18   7  277.00   17.21
  -1 -18   7  253.70   16.20
  -1  18   7  253.70   18.66
   1 -18  -6    4.82   10.32
  -1 -18   6   16.22    8.31
  -1 -18   6   11.65    8.65
  -1  18   6   10.70   11.28
   1 -18  -5  493.60   27.42
  -1 -18   5  514.20   28.27
  -1 -18   5  490.70   27.30
  -1  18   5  493.50   27.50
   1 -18  -4  194.70   15.27
  -1 -18   4  188.10   14.69
  -1 -18   4  188.40   13.82
  -1  18   4  193.00   15.65
   1 -18  -3   21.22    9.31
  -1 -18   3   27.65    9.84
  -1 -18   3   16.89   10.69
  -1  18   3   18.67   10.19
   1 -18  -2  186.10   14.61
  -1 -18   2  161.10   13.35
  -1 -18   2  165.50   13.49
   1  18  -2  164.40   14.16
  -1  18   2  127.90   13.76
   1 -18  -1  217.60   16.01
  -1 -18   1  237.70   16.39
   1  18  -1  213.60   16.35
  -1  18   1  203.20   16.32
   1 -18   0  -12.30   10.68
  -1 -18   0   -8.57    9.73
   1  18   0   -7.63   11.27
  -1  18   0    6.93   10.02
   1 -18   1   18.74   10.27
  -1 -18  -1   17.89    9.68
   1  18   1  -12.81   11.98
  -1  18  -1   -0.36   10.34
   1 -18   2  141.30   13.00
   1 -18   2  122.70   11.71
  -1 -18  -2  120.80   12.76
   1  18   2  120.10   12.66
  -1  18  -2  123.10   12.57
   1 -18   3   46.69    9.89
   1 -18   3   53.80   10.93
  -1 -18  -3   42.46   10.87
   1  18   3   62.99   11.48
   1 -18   4  100.60   11.12
   1 -18   4   96.76   11.17
  -1 -18  -4  119.20   12.61
   1  18   4   87.82   12.08
   1 -18   5   18.55    8.75
   1 -18   5   15.40    9.32
  -1 -18  -5   26.30   10.95
   1  18   5   14.74   10.85
   1 -18   6  225.60   15.06
   1 -18   6  221.80   15.04
  -1 -18  -6  231.80   16.98
   1  18   6  232.10   17.26
   1 -18   7   16.31    7.72
   1 -18   7    9.45    7.91
  -1 -18  -7    8.08   10.87
   1  18   7   25.31   10.73
   1 -18   8   -5.56    8.14
   1 -18   8    9.43    7.95
  -1 -18  -8    2.08    9.64
   1  18   8   -8.93    8.93
   1 -18   9    9.50    7.54
   1 -18   9    5.63    7.42
  -1 -18  -9    9.23   10.68
   1  18   9   20.41    8.71
   1 -18  10   22.36    7.11
   1 -18  10   24.28    7.62
  -1 -18 -10   35.94   10.82
   1  18  10   40.85    9.60
   1 -18  11   34.98    7.23
   1 -18  11   37.23    7.13
  -1 -18 -11   35.47   10.34
   1  18  11   21.35   10.01
   1 -18  12   53.95    6.09
   1 -18  12   39.37    6.97
  -1 -18 -12   44.40    9.63
   1  18  12   47.13    9.89
   1 -19 -12  -11.06    8.71
  -1 -19  12   -4.13    5.92
  -1 -19  12   11.30    6.74
  -1  19  12   21.49    8.96
   1 -19 -11   -3.59    9.97
  -1 -19  11    0.10    6.58
  -1 -19  11    3.94    7.20
  -1  19  11   -0.82    8.09
   1 -19 -10    4.86   10.25
  -1 -19  10    3.60    7.12
  -1 -19  10    2.34    6.70
  -1  19  10    2.72    8.49
   1 -19  -9  234.80   16.70
  -1 -19   9  216.70   14.13
  -1 -19   9  222.60   14.66
  -1  19   9  219.40   16.91
   1 -19  -8   -7.15   10.08
  -1 -19   8    8.16    8.03
  -1 -19   8   15.85    8.93
  -1  19   8   -2.27   11.55
   1 -19  -7   16.34   11.07
  -1 -19   7   21.89    8.21
  -1 -19   7   16.18    8.31
  -1  19   7   15.07   11.59
   1 -19  -6   66.59   11.27
  -1 -19   6   81.65    9.98
  -1 -19   6   75.54    9.77
  -1  19   6   66.92   12.42
   1 -19  -5   18.09   10.09
  -1 -19   5    4.76    9.53
  -1 -19   5   10.47    9.03
  -1  19   5   15.56   11.51
   1 -19  -4  426.60   25.39
  -1 -19   4  358.10   21.29
  -1 -19   4  413.50   23.53
  -1  19   4  398.50   23.61
   1 -19  -3  237.40   16.22
  -1 -19   3  249.70   16.83
  -1 -19   3  216.40   15.68
  -1  19   3  236.20   17.30
   1 -19  -2  130.40   13.29
  -1 -19   2  124.50   12.56
  -1 -19   2  139.10   12.90
   1  19  -2  120.10   12.82
  -1  19   2  109.50   13.27
   1 -19  -1   76.40   11.42
  -1 -19   1   84.00   10.61
   1  19  -1   56.55   11.41
  -1  19   1   82.49   12.93
   1 -19   0  160.50   14.44
  -1 -19   0  152.10   13.48
   1  19   0  136.30   14.66
  -1  19   0  158.90   14.12
   1 -19   1  133.80   11.81
  -1 -19  -1  137.60   13.44
   1  19   1  130.00   13.92
  -1  19  -1  165.20   15.09
   1 -19   2  296.70   18.57
   1 -19   2  339.40   20.95
  -1 -19  -2  301.40   19.61
   1  19   2  300.80   19.16
  -1  19  -2  317.70   20.18
   1 -19   3   55.51   11.39
   1 -19   3   45.25   10.11
  -1 -19  -3   52.83   11.01
   1  19   3   20.49   11.95
   1 -19   4   11.29    9.16
   1 -19   4   16.08    9.53
  -1 -19  -4   25.63   10.75
   1  19   4   10.16   10.52
   1 -19   5  919.90   47.60
   1 -19   5  867.90   45.00
  -1 -19  -5  963.30   49.88
   1  19   5  955.70   49.64
   1 -19   6   40.78    8.98
   1 -19   6   24.51    8.26
  -1 -19  -6   38.88   11.32
   1  19   6   19.57   10.45
   1 -19   7   21.89    7.97
   1 -19   7   11.82    7.18
  -1 -19  -7   25.67   10.58
   1  19   7   14.38   10.65
   1 -19   8   -3.67    7.58
   1 -19   8    6.73    7.75
  -1 -19  -8   -3.59   10.04
   1  19   8   12.00    8.99
   1 -19   9   -7.28    8.41
   1 -19   9    0.22    7.63
  -1 -19  -9    7.31   10.51
   1  19   9   -0.20    9.19
   1 -19  10   13.70    6.45
   1 -19  10   29.02    6.70
  -1 -19 -10   13.58   11.20
   1  19  10   18.08    8.84
   1 -19  11   42.48    7.17
   1 -19  11   51.01    7.58
  -1 -19 -11   48.58    9.85
   1  19  11   56.12    9.61
   1 -20 -12    3.07    8.43
  -1 -20  12   -3.51    4.96
  -1 -20  12   -4.06    5.84
  -1  20  12    1.59    9.80
   1 -20 -11   58.31   10.13
  -1 -20  11   44.68    7.36
  -1 -20  11   40.53    7.38
  -1  20  11   25.99    9.09
   1 -20 -10   26.97   10.43
  -1 -20  10   35.90    7.39
  -1 -20  10   38.33    7.17
  -1  20  10   29.37   10.03
   1 -20  -9    7.72    9.70
  -1 -20   9    6.24    7.38
  -1 -20   9    9.37    7.75
  -1  20   9  -23.83   10.63
   1 -20  -8  138.90   13.29
  -1 -20   8  140.30   11.91
  -1 -20   8  132.70   11.20
  -1  20   8  136.70   14.25
   1 -20  -7   59.69   11.78
  -1 -20   7   44.09    8.89
  -1 -20   7   28.51    8.90
  -1  20   7   53.00   11.91
   1 -20  -6   -8.13   10.09
  -1 -20   6    6.92    7.81
  -1 -20   6  -12.58    8.23
  -1  20   6   -2.34   11.41
   1 -20  -5    8.38    8.99
  -1 -20   5   -3.80    8.10
  -1 -20   5   12.71    8.93
  -1  20   5   11.35   10.82
   1 -20  -4  383.00   23.27
  -1 -20   4  377.60   22.19
  -1 -20   4  376.10   21.66
  -1  20   4  368.00   22.39
   1 -20  -3  367.30   21.81
  -1 -20   3  372.70   22.08
  -1 -20   3  384.20   22.71
  -1  20   3  380.30   22.93
   1 -20  -2   33.91   10.52
  -1 -20   2   23.61    9.81
  -1 -20   2   41.57   10.44
   1  20  -2   20.53   10.94
  -1  20   2   21.97   10.03
   1 -20  -1  194.50   14.25
  -1 -20   1  174.00   14.51
   1  20  -1  177.80   14.95
  -1  20   1  217.60   16.45
   1 -20   0  228.80   16.02
  -1 -20   0  240.20   16.90
   1  20   0  230.80   17.36
  -1  20   0  254.30   17.92
   1 -20   1   -0.69    8.95
  -1 -20  -1   -5.08   10.69
   1  20   1   -1.35   10.46
  -1  20  -1   -2.54   10.57
   1 -20   2   28.92    9.28
   1 -20   2   -9.56    9.78
  -1 -20  -2    1.62   10.71
   1  20   2    3.65    9.89
  -1  20  -2   16.37   10.08
   1 -20   3  133.70   12.60
   1 -20   3  134.90   13.04
  -1 -20  -3  121.50   12.81
   1  20   3  125.70   13.34
   1 -20   4  409.70   23.81
   1 -20   4  423.30   24.31
  -1 -20  -4  344.00   21.65
   1  20   4  393.70   23.54
   1 -20   5   -5.84    8.80
   1 -20   5    7.87    9.27
  -1 -20  -5   -0.60   10.65
   1  20   5    6.03   10.47
   1 -20   6  110.30   10.53
   1 -20   6   89.26    9.76
  -1 -20  -6   91.06   12.16
   1  20   6   94.84   13.04
   1 -20   7   29.11    8.46
   1 -20   7   43.56    8.67
  -1 -20  -7   34.86   10.18
   1  20   7   40.25    8.57
   1 -20   8    4.48    8.16
   1 -20   8    2.54    7.55
  -1 -20  -8    6.28    9.98
   1  20   8   24.78    9.41
   1 -20   9    9.41    7.66
   1 -20   9    0.15    6.73
  -1 -20  -9  -12.13   10.20
   1  20   9    9.42    9.38
   1 -20  10   44.77    7.32
   1 -20  10   62.55    7.34
  -1 -20 -10   66.90   12.03
   1  20  10   38.82    9.66
   1 -20  11    9.91    6.07
   1 -20  11   27.08    6.77
  -1 -20 -11   -2.12    9.07
   1  20  11   -2.27    8.83
   1 -21 -11   11.65    8.84
  -1 -21  11   -3.77    6.20
  -1 -21  11   -7.57    6.68
  -1  21  11   -5.52    8.39
   1 -21 -10   30.03    9.74
  -1 -21  10   31.56    6.96
  -1 -21  10   27.60    7.08
  -1  21  10   37.38    9.84
   1 -21  -9   57.26   10.25
  -1 -21   9   51.90    7.83
  -1 -21   9   64.29    7.95
  -1  21   9   34.71   10.23
   1 -21  -8   87.27   12.00
  -1 -21   8   98.88    9.80
  -1 -21   8   77.07    9.09
  -1  21   8   95.99   12.20
   1 -21  -7   61.98   10.97
  -1 -21   7   71.64    9.54
  -1 -21   7   68.35    9.26
  -1  21   7   42.27   11.36
   1 -21  -6   20.76   10.59
  -1 -21   6    8.05    7.80
  -1 -21   6    2.50    7.90
  -1  21   6  -15.74   10.67
   1 -21  -5   -0.49    9.06
  -1 -21   5    2.90    9.00
  -1 -21   5   10.21    8.41
  -1  21   5   -0.99   11.01
   1 -21  -4   12.50   11.19
  -1 -21   4    6.77    9.42
  -1 -21   4    1.77    8.32
  -1  21   4   -3.96   10.07
   1 -21  -3  106.70   11.12
  -1 -21   3  116.50   11.51
  -1 -21   3  120.20   11.94
  -1  21   3  155.10   13.74
   1 -21  -2   80.52   11.84
  -1 -21   2   94.92   11.03
  -1 -21   2   74.71   10.90
   1  21  -2   66.10   11.09
  -1  21   2   70.77   11.54
   1 -21  -1  270.80   18.06
  -1 -21   1  256.60   17.22
   1  21  -1  260.70   18.10
  -1  21   1  260.70   17.71
   1 -21   0  205.60   15.20
  -1 -21   0  223.60   16.16
   1  21   0  184.30   14.94
  -1  21   0  221.30   16.35
   1 -21   1   19.71    9.61
  -1 -21  -1   19.21   11.22
   1  21   1    6.82    9.38
  -1  21  -1   16.56    9.85
   1 -21   2   50.18   10.21
   1 -21   2   55.38    9.67
  -1 -21  -2   65.07   11.77
   1  21   2   64.72   11.27
  -1  21  -2   65.33   10.94
   1 -21   3  139.10   12.52
   1 -21   3  150.60   13.06
  -1 -21  -3  154.40   14.02
   1  21   3  156.30   14.20
   1 -21   4   67.72    9.98
   1 -21   4   71.71   10.25
  -1 -21  -4   60.15   11.54
   1  21   4   52.54   11.73
   1 -21   5  256.00   16.95
   1 -21   5  261.30   16.61
  -1 -21  -5  284.10   18.41
   1  21   5  243.10   17.39
   1 -21   6   66.47    9.12
   1 -21   6   62.52    9.35
  -1 -21  -6   78.37   11.16
   1  21   6   72.74   11.24
   1 -21   7   19.46    8.49
   1 -21   7   19.42    7.93
  -1 -21  -7    7.27    9.52
   1  21   7   20.37    9.28
   1 -21   8    4.43    7.76
   1 -21   8   14.43    8.39
  -1 -21  -8    7.97    9.78
   1  21   8    4.46    8.47
   1 -21   9   -4.75    7.57
   1 -21   9   -7.78    6.80
  -1 -21  -9   -4.21   11.48
   1  21   9    2.13    8.73
   1 -21  10   15.91    6.08
   1 -21  10    7.87    6.72
  -1 -21 -10   31.25   11.24
   1  21  10   29.92   10.12
   1 -21  11   24.14    5.76
   1 -21  11   23.48    7.24
  -1 -21 -11   13.54    8.91
   1  21  11   32.84   11.75
   1 -22 -11   42.83    9.34
  -1 -22  11   22.33    6.60
  -1 -22  11   40.00    6.52
  -1  22  11   35.94   10.35
   1 -22 -10   17.37    8.73
  -1 -22  10   10.52    6.93
  -1 -22  10   13.30    6.81
  -1  22  10    9.40    9.57
   1 -22  -9   11.60    9.81
  -1 -22   9   12.69    8.07
  -1 -22   9   11.34    7.65
  -1  22   9    8.34    9.90
   1 -22  -8   38.34   10.65
  -1 -22   8   16.97    7.98
  -1 -22   8   29.43    7.62
  -1  22   8   40.93   11.24
   1 -22  -7  261.40   18.34
  -1 -22   7  255.20   16.23
  -1 -22   7  235.80   14.62
  -1  22   7  230.30   16.90
   1 -22  -6  121.40   12.38
  -1 -22   6  116.70   10.71
  -1 -22   6  122.30   10.84
  -1  22   6  109.60   12.83
   1 -22  -5   18.60    9.95
  -1 -22   5    5.96    8.46
  -1 -22   5   23.60    8.84
  -1  22   5    3.37   10.52
   1 -22  -4    4.24   10.93
  -1 -22   4    0.14    8.53
  -1 -22   4   -7.16    8.84
  -1  22   4    9.33   10.95
   1 -22  -3   70.43   10.67
  -1 -22   3   92.33   10.74
  -1 -22   3  104.10   11.72
  -1  22   3   81.81   12.17
   1 -22  -2  288.20   18.63
  -1 -22   2  284.10   18.04
  -1 -22   2  325.80   19.90
   1  22  -2  296.60   19.00
  -1  22   2  297.90   18.72
   1 -22  -1   32.89    9.54
  -1 -22   1   14.56    9.57
  -1 -22   1    4.56    8.83
   1  22  -1    5.27   10.34
  -1  22   1   -4.63    9.53
   1 -22   0   51.32   10.02
  -1 -22   0   31.42    9.98
   1  22   0   36.70   10.48
  -1  22   0   55.90   11.37
   1 -22   1  252.50   16.86
  -1 -22  -1  265.00   18.30
   1  22   1  242.40   16.35
  -1  22  -1  268.90   18.68
   1 -22   2  191.10   14.45
   1 -22   2  204.50   14.88
  -1 -22  -2  210.90   16.07
   1  22   2  205.80   15.23
  -1  22  -2  187.60   15.06
   1 -22   3  197.00   14.08
   1 -22   3  189.90   14.38
  -1 -22  -3  175.90   14.34
   1  22   3  235.10   16.84
   1 -22   4  241.50   16.21
   1 -22   4  224.00   15.27
  -1 -22  -4  221.40   16.18
   1  22   4  222.70   17.01
   1 -22   5   -3.08    8.32
   1 -22   5   -2.75    9.19
  -1 -22  -5   -6.54   10.30
   1  22   5    7.21   10.75
   1 -22   6   23.25    7.90
   1 -22   6    8.77    8.62
  -1 -22  -6   12.08   10.76
   1  22   6    7.49    9.17
   1 -22   7   76.86    9.83
   1 -22   7   85.56    9.58
  -1 -22  -7   89.23   11.94
   1  22   7   83.97   10.41
   1 -22   8   40.35    7.91
   1 -22   8   51.44    7.72
  -1 -22  -8   27.19   10.33
   1  22   8   41.55    9.93
   1 -22   9   15.69    6.92
   1 -22   9    4.29    7.61
  -1 -22  -9   15.45   10.51
   1  22   9    5.09    9.11
   1 -22  10   17.47    7.75
   1 -22  10   -0.11    5.93
  -1 -22 -10   12.86    8.98
   1  22  10    4.67    9.07
   1 -23 -11   14.31    8.69
  -1 -23  11    7.56    6.17
  -1 -23  11    2.67    6.55
  -1  23  11  -17.65   11.19
   1 -23 -10    9.56    8.73
  -1 -23  10   26.29    6.23
  -1 -23  10   40.59    7.55
  -1  23  10   27.07    8.31
   1 -23  -9   -0.99   10.22
  -1 -23   9    7.88    7.99
  -1 -23   9   17.91    7.15
  -1  23   9    0.42    9.13
   1 -23  -8    1.64   10.24
  -1 -23   8   25.22    7.88
  -1 -23   8   23.16    7.53
  -1  23   8   23.73   10.54
   1 -23  -7   37.72   11.01
  -1 -23   7   49.38    8.29
  -1 -23   7   46.75    9.09
  -1  23   7   28.97   10.48
   1 -23  -6  118.50   11.40
  -1 -23   6  119.50   11.23
  -1 -23   6  110.90   10.27
  -1  23   6  117.20   12.32
   1 -23  -5   38.44   10.20
  -1 -23   5   13.47    8.76
  -1 -23   5   34.22    9.15
  -1  23   5   63.17   11.75
   1 -23  -4  220.90   16.49
  -1 -23   4  191.10   13.83
  -1 -23   4  211.50   15.50
  -1  23   4  175.80   14.66
   1 -23  -3   87.24   10.74
  -1 -23   3   99.05   11.11
  -1 -23   3   77.90   10.55
  -1  23   3  123.50   12.77
   1 -23  -2   22.02   10.33
  -1 -23   2   39.51    9.47
  -1 -23   2   43.40   10.69
  -1  23   2  103.50   12.16
   1 -23  -1  105.40   11.88
  -1 -23   1   86.75   10.63
  -1 -23   1   82.07   10.79
   1  23  -1   84.52   10.68
  -1  23   1   97.98   11.51
   1 -23   0   72.30   10.14
  -1 -23   0   67.20   10.81
   1  23   0   86.10   11.01
  -1  23   0   72.11   11.42
   1 -23   1   12.44    8.29
   1 -23   1   -1.38   10.19
  -1 -23  -1    8.66   10.24
   1  23   1    7.16    8.69
  -1  23  -1    4.25   10.41
   1 -23   2   22.40    8.06
   1 -23   2   11.81    9.12
  -1 -23  -2   36.46   11.41
   1  23   2   25.64   10.19
  -1  23  -2   38.05    9.89
   1 -23   3  237.50   15.96
   1 -23   3  256.70   16.69
  -1 -23  -3  245.40   17.23
   1  23   3  241.00   16.95
   1 -23   4   88.85   10.53
   1 -23   4   83.78    9.62
  -1 -23  -4  102.30   11.78
   1  23   4   91.59   12.85
   1 -23   5   85.57   10.71
   1 -23   5   79.08   10.95
  -1 -23  -5   79.63   11.59
   1  23   5   74.88   10.88
   1 -23   6   52.68    8.73
   1 -23   6   55.18    9.48
  -1 -23  -6   64.81   12.59
   1  23   6   60.43    9.70
   1 -23   7   17.44    7.72
   1 -23   7   32.13    8.20
  -1 -23  -7   33.82   10.76
   1  23   7   36.91    9.57
   1 -23   8   -2.93    7.53
   1 -23   8    7.62    7.70
  -1 -23  -8   29.13   10.57
   1  23   8    5.01    9.14
   1 -23   9   12.87    7.11
   1 -23   9   10.23    6.96
  -1 -23  -9   -3.11    9.36
   1  23   9   18.78    9.80
   1 -23  10    7.00    6.52
   1 -23  10   -2.25    6.47
  -1 -23 -10   -4.23    8.99
   1  23  10   -1.62    9.79
   1 -24 -10    5.33    7.94
  -1 -24  10   13.82    6.48
  -1 -24  10   11.20    6.59
  -1  24  10   -3.24    7.85
   1 -24  -9   14.10    8.76
  -1 -24   9   38.07    7.86
  -1 -24   9   49.27    8.24
  -1  24   9   30.58    9.61
   1 -24  -8   -7.61   10.13
  -1 -24   8   10.83    7.24
  -1 -24   8   20.72    7.85
  -1  24   8  -23.43    9.78
   1 -24  -7  167.70   13.80
  -1 -24   7  152.30   11.57
  -1 -24   7  166.80   12.20
  -1  24   7  150.90   13.52
   1 -24  -6   38.56    9.83
  -1 -24   6   20.67    8.76
  -1 -24   6   28.34    8.15
  -1  24   6   15.53   10.69
   1 -24  -5   16.86    9.81
  -1 -24   5   -1.87    8.33
  -1 -24   5   12.47    9.81
  -1  24   5    0.14   10.84
   1 -24  -4  326.00   20.62
  -1 -24   4  311.40   18.71
  -1 -24   4  307.00   18.51
  -1  24   4  293.40   20.00
   1 -24  -3  152.40   12.51
  -1 -24   3  166.10   13.33
  -1 -24   3  182.90   13.59
  -1  24   3  175.50   14.20
   1 -24  -2    5.78   10.08
  -1 -24   2   22.74    8.67
  -1 -24   2   19.62    9.65
  -1  24   2   10.55    9.55
   1 -24  -1  157.00   13.67
  -1 -24   1  153.40   12.53
  -1 -24   1  142.80   12.46
   1  24  -1  164.00   12.64
  -1  24   1  161.80   12.90
   1 -24   0   68.58   10.01
  -1 -24   0   71.21    9.85
   1  24   0   74.80   10.61
  -1  24   0   66.91   10.79
   1 -24   1   21.85    8.99
   1 -24   1   23.45    8.54
  -1 -24  -1   30.88   11.38
   1  24   1   50.91    9.83
  -1  24  -1   21.80    9.22
   1 -24   2   25.78    8.77
   1 -24   2   37.49    9.52
  -1 -24  -2   36.45   10.99
   1  24   2   37.08   10.51
  -1  24  -2   30.51    9.12
   1 -24   3  108.60   11.31
   1 -24   3  104.80   10.96
  -1 -24  -3  118.50   12.52
   1  24   3  120.80   12.98
   1 -24   4  105.10   10.87
   1 -24   4  108.80   10.54
  -1 -24  -4  122.50   12.77
   1  24   4  119.60   12.96
   1 -24   5   13.05    8.87
   1 -24   5   17.59    9.07
  -1 -24  -5   42.49   10.42
   1  24   5   19.21    9.99
   1 -24   6   73.93    9.12
   1 -24   6   89.70   10.18
  -1 -24  -6  102.60   12.17
   1  24   6   76.66   10.40
   1 -24   7   76.02    8.88
   1 -24   7   77.61    9.13
  -1 -24  -7   64.81   11.65
   1  24   7   43.44   10.40
   1 -24   8  -19.46    7.27
  -1 -24  -8  -10.55   10.48
   1  24   8  -15.12    9.11
   1 -24   9   -3.16    7.82
   1 -24   9   18.28    7.67
  -1 -24  -9   -0.11    8.41
   1  24   9    5.87    9.05
   1 -24  10   12.07    6.97
   1 -24  10   14.29    6.19
   1  24  10    9.57   10.76
   1 -25 -10   -3.21    7.64
  -1 -25  10   -6.35    5.90
  -1 -25  10    1.49    6.53
  -1  25  10   12.35    8.80
   1 -25  -9   21.51    8.44
  -1 -25   9   20.01    7.53
  -1 -25   9   15.19    7.31
  -1  25   9    6.22    8.16
   1 -25  -8   -9.82   10.25
  -1 -25   8    0.23    7.55
  -1 -25   8    9.22    6.92
  -1  25   8    7.22    8.85
   1 -25  -7   -3.56   10.17
  -1 -25   7    7.28    7.67
  -1 -25   7   -0.07    6.84
  -1  25   7    0.39    9.07
   1 -25  -6   26.44    9.49
  -1 -25   6   13.69    7.61
  -1 -25   6   26.20    9.07
  -1  25   6   -6.55   10.47
   1 -25  -5  101.80   11.72
  -1 -25   5  128.50   12.09
  -1 -25   5  109.70   10.69
  -1  25   5  108.20   13.86
   1 -25  -4   33.09   11.77
  -1 -25   4   31.10    8.83
  -1 -25   4   31.81    8.61
  -1  25   4   20.21   10.57
   1 -25  -3   68.95   10.61
  -1 -25   3   94.75    9.98
  -1 -25   3  102.00   10.92
  -1  25   3   85.24   12.11
   1 -25  -2   18.49    9.93
  -1 -25   2   -9.86    8.14
  -1 -25   2   10.97    8.41
  -1  25   2  -14.24    9.38
   1 -25  -1    3.12   10.03
  -1 -25   1    3.73    9.00
  -1 -25   1    7.21    8.61
   1  25  -1   -2.53    8.53
  -1  25   1   -0.74    9.24
   1 -25   0   73.48   10.04
  -1 -25   0   95.68   10.45
   1  25   0   65.65   10.29
  -1  25   0   88.78   11.71
   1 -25   1  178.70   14.06
   1 -25   1  198.50   14.19
  -1 -25  -1  198.20   15.65
   1  25   1  219.90   15.67
  -1  25  -1  195.50   15.32
   1 -25   2   36.45    9.28
   1 -25   2   35.42    9.66
  -1 -25  -2   30.24   11.35
   1  25   2   29.33    9.79
   1 -25   3   -2.20    8.30
   1 -25   3    0.73    8.49
  -1 -25  -3   -4.67   11.31
   1  25   3   -0.10    9.89
   1 -25   4   56.15    9.66
   1 -25   4   64.71    9.25
  -1 -25  -4   73.39   11.21
   1  25   4   81.16   10.56
   1 -25   5  287.20   17.90
   1 -25   5  303.30   18.43
  -1 -25  -5  288.00   18.65
   1  25   5  297.20   18.66
   1 -25   6   41.35    9.04
   1 -25   6   59.72    9.11
  -1 -25  -6   41.29   11.86
   1  25   6   53.61   10.08
   1 -25   7   13.97    7.98
   1 -25   7    8.76    7.32
  -1 -25  -7   -2.94   10.15
   1  25   7   13.10    9.39
   1 -25   8   -1.37    6.63
   1 -25   8    8.59    6.98
  -1 -25  -8   -8.12    9.28
   1  25   8   -3.62    9.03
   1 -25   9    9.32    6.99
   1 -25   9   15.08    7.00
  -1 -25  -9    9.02    8.29
   1  25   9    3.71    8.80
   1 -26  -9    8.18    8.24
  -1 -26   9    7.12    6.65
  -1 -26   9   13.45    7.05
  -1  26   9  -12.82    7.75
   1 -26  -8   11.68    9.05
  -1 -26   8   19.49    6.44
  -1 -26   8   20.47    7.49
  -1  26   8    0.85    8.18
   1 -26  -7   23.12    9.77
  -1 -26   7    0.94    8.07
  -1 -26   7   25.91    7.24
  -1  26   7   -4.80    8.51
   1 -26  -6   36.43   10.62
  -1 -26   6    8.13    8.65
  -1 -26   6   -1.97    7.42
  -1  26   6    2.29   10.08
   1 -26  -5    8.44    9.48
  -1 -26   5   17.13    8.43
  -1 -26   5   17.71    8.31
  -1  26   5   15.57   11.18
   1 -26  -4  164.50   14.01
  -1 -26   4  191.60   13.61
  -1 -26   4  177.80   13.21
  -1  26   4  208.90   16.01
   1 -26  -3   69.77   10.22
  -1 -26   3   71.14    9.73
  -1 -26   3   77.57    9.58
  -1  26   3   75.33   11.80
   1 -26  -2   -5.20    9.62
  -1 -26   2    9.84    8.91
  -1 -26   2   -4.13    8.66
  -1  26   2   -0.59    9.22
   1 -26  -1   24.77    9.64
  -1 -26   1   36.47    9.60
  -1 -26   1   34.60    9.38
   1  26  -1   17.71    9.12
  -1  26   1   10.14    8.70
   1 -26   0   47.29    9.39
  -1 -26   0   54.19    9.87
   1  26   0   53.84   10.19
  -1  26   0   52.78   10.30
   1 -26   1  155.60   12.88
   1 -26   1  150.30   12.60
  -1 -26  -1  167.00   14.40
   1  26   1  176.20   14.47
  -1  26  -1  145.70   13.04
   1 -26   2   62.60    8.85
   1 -26   2   64.09    9.82
  -1 -26  -2   68.67   10.22
   1  26   2   59.27   10.16
   1 -26   3  174.00   12.37
   1 -26   3  192.50   13.89
  -1 -26  -3  208.80   15.63
   1  26   3  177.60   13.93
   1 -26   4   91.43    9.87
   1 -26   4  106.10   10.51
  -1 -26  -4   90.54   11.68
   1  26   4  130.80   11.90
   1 -26   5   18.91    8.88
   1 -26   5    2.12    7.45
  -1 -26  -5   10.84    9.83
   1  26   5   -2.38    8.85
   1 -26   6    6.37    7.49
   1 -26   6    3.34    7.99
  -1 -26  -6    4.75   10.78
   1  26   6   -1.54    9.26
   1 -26   7   66.08    8.49
   1 -26   7   55.56    8.39
  -1 -26  -7   40.71   10.50
   1  26   7   49.54    9.95
   1 -26   8    5.55    6.34
   1 -26   8   -0.17    6.06
  -1 -26  -8   12.95    8.40
   1  26   8   11.67    8.62
   1 -26   9    1.02    6.77
   1 -26   9    3.02    6.42
   1  26   9    1.68    8.23
   1 -27  -9    2.56    8.65
  -1 -27   9   14.90    7.35
  -1 -27   9   -1.50    6.39
  -1  27   9   23.22    8.06
   1 -27  -8   17.38    8.27
  -1 -27   8   18.28    7.07
  -1 -27   8   24.81    7.17
  -1  27   8   11.72    7.54
   1 -27  -7   47.86    8.51
  -1 -27   7   47.85    6.93
  -1 -27   7   32.50    8.44
  -1  27   7   41.49    9.03
   1 -27  -6  -20.19    8.75
  -1 -27   6    2.85    7.66
  -1 -27   6   -2.24    7.26
  -1  27   6   -3.58    9.16
   1 -27  -5    0.05    9.60
  -1 -27   5   27.18    9.12
  -1 -27   5   -1.22    8.35
  -1  27   5   18.72    9.78
   1 -27  -4   19.56   10.44
  -1 -27   4   15.43    8.52
  -1 -27   4    2.88    8.62
  -1  27   4   12.00    9.93
   1 -27  -3   71.71   10.19
  -1 -27   3   62.71    9.01
  -1 -27   3   73.04    9.94
  -1  27   3   67.90   10.78
   1 -27  -2    2.48    9.69
  -1 -27   2   -7.45    8.32
  -1 -27   2   -2.00    8.38
  -1  27   2    0.51    8.88
   1 -27  -1   25.35    9.03
  -1 -27   1    6.48    8.40
  -1 -27   1   39.49    9.01
   1  27  -1   17.02    8.52
  -1  27   1   24.76    9.49
   1 -27   0  138.40   11.93
  -1 -27   0  122.70   11.93
   1  27   0  134.80   12.09
  -1  27   0  146.10   12.85
   1 -27   1   36.00    8.93
   1 -27   1   34.73    8.83
  -1 -27  -1   47.60   10.12
   1  27   1   50.02   10.07
  -1  27  -1   17.64    9.00
   1 -27   2   50.55    8.98
   1 -27   2   43.49    9.12
  -1 -27  -2   51.71   10.23
   1  27   2   32.69    9.41
   1 -27   3  203.80   13.45
   1 -27   3  195.60   13.76
  -1 -27  -3  229.80   16.52
   1  27   3  205.30   14.56
   1 -27   4   25.26    7.75
   1 -27   4    5.07    7.95
  -1 -27  -4   20.23   10.23
   1  27   4    0.27    8.42
   1 -27   5    0.79    8.10
   1 -27   5    5.64    7.67
  -1 -27  -5    7.73    9.93
   1  27   5   -1.83    8.47
   1 -27   6   14.68    8.13
   1 -27   6   10.54    7.91
  -1 -27  -6   12.77   10.24
   1  27   6    4.63    9.16
   1 -27   7   12.48    6.83
  -1 -27  -7   18.60    9.09
   1  27   7   -1.84    9.51
   1 -27   8   11.27    6.75
   1 -27   8    9.22    6.60
  -1 -27  -8   -3.22    8.25
   1  27   8   14.58    8.31
   1 -28  -8    8.17    7.84
  -1 -28   8   -3.19    6.23
  -1 -28   8   -2.63    6.75
  -1  28   8   -1.94    7.65
   1 -28  -7    7.52    7.56
  -1 -28   7   16.80    6.29
  -1 -28   7   28.92    7.42
  -1  28   7   19.56    8.12
   1 -28  -6   86.53    9.67
  -1 -28   6  121.70   10.80
  -1 -28   6  117.90    9.66
  -1  28   6  122.30   11.27
   1 -28  -5    6.24    8.16
  -1 -28   5   -4.40    7.31
  -1 -28   5  -18.20    7.64
  -1  28   5    8.45    8.83
   1 -28  -4   13.88   10.40
  -1 -28   4   -4.30    8.16
  -1 -28   4   -8.23    8.23
  -1  28   4   -9.94    8.92
   1 -28  -3   83.44   10.18
  -1 -28   3   92.90    9.53
  -1 -28   3   99.70   10.08
  -1  28   3   84.27   10.43
   1 -28  -2   15.09    9.00
  -1 -28   2   18.04    8.11
  -1 -28   2   17.28    8.44
  -1  28   2   20.74    8.39
   1 -28  -1   98.15   11.21
  -1 -28   1   72.70    9.61
  -1 -28   1  103.40   10.44
   1  28  -1  102.50   10.32
  -1  28   1  111.20   11.83
   1 -28   0   -4.89    8.37
  -1 -28   0   -2.34    7.66
  -1 -28   0    6.98    8.66
   1  28   0   16.83    8.76
  -1  28   0    5.48    9.40
   1 -28   1   21.87    8.99
   1 -28   1   14.41    8.27
  -1 -28  -1   27.98   10.21
   1  28   1   20.94    9.47
  -1  28  -1   12.46    8.92
   1 -28   2  237.50   15.26
   1 -28   2  230.50   15.28
  -1 -28  -2  234.20   15.78
   1  28   2  264.70   17.38
   1 -28   3   11.05    7.92
   1 -28   3   11.35    7.99
  -1 -28  -3  -10.21   10.80
   1  28   3   -8.25    7.65
   1 -28   4   19.86    8.80
   1 -28   4   26.21    8.18
  -1 -28  -4   15.37   10.06
   1  28   4   12.48    8.34
   1 -28   5    3.60    7.05
   1 -28   5  -12.04    7.92
  -1 -28  -5    1.57    9.61
   1  28   5   -6.65    9.02
   1 -28   6   24.66    7.22
   1 -28   6   12.02    7.17
  -1 -28  -6   24.82    9.17
   1  28   6   15.27    9.15
   1 -28   7   17.89    6.63
   1 -28   7   18.60    6.50
  -1 -28  -7    9.30    8.75
   1  28   7   14.98    8.80
   1 -29  -7    0.39    7.66
  -1 -29   7    9.82    6.96
  -1 -29   7   -7.91    6.62
  -1  29   7   16.16    8.29
   1 -29  -6    2.29    7.94
  -1 -29   6    1.39    7.05
  -1 -29   6   -4.65    6.67
  -1  29   6   -7.02    7.95
   1 -29  -5   93.36    9.68
  -1 -29   5   79.78    9.28
  -1 -29   5  116.70   10.11
  -1  29   5   81.28   10.66
   1 -29  -4   36.06    9.93
  -1 -29   4   25.09    8.01
  -1 -29   4   44.46    9.04
  -1  29   4   22.42    9.22
   1 -29  -3   10.07    9.50
  -1 -29   3   13.71    7.62
  -1 -29   3  -12.47    7.74
  -1  29   3    3.27    8.11
   1 -29  -2   23.04    9.85
  -1 -29   2   15.64    7.92
  -1 -29   2    8.45    7.98
  -1  29   2   25.03    9.80
   1 -29  -1   12.07    9.02
  -1 -29   1   -2.43    8.48
  -1 -29   1   15.48    8.16
   1  29  -1   -0.16    7.09
  -1  29   1    8.63    9.59
   1 -29   0   18.70    9.06
   1 -29   0    0.02    7.13
  -1 -29   0    9.57    9.39
  -1 -29   0   10.48    8.10
   1  29   0   -0.05    8.66
  -1  29   0  -15.72    9.05
   1 -29   1  130.90   10.24
   1 -29   1  115.10    9.87
  -1 -29  -1  123.70   12.06
   1  29   1  123.70   11.35
  -1  29  -1  108.50    9.99
   1 -29   2    3.72    7.61
   1 -29   2   -8.45    7.64
  -1 -29  -2    1.82    8.01
   1  29   2   -0.19    8.12
   1 -29   3   68.04    8.10
   1 -29   3   52.57    8.14
  -1 -29  -3   78.03   10.97
   1  29   3   40.58    8.51
   1 -29   4    7.57    8.26
   1 -29   4   18.80    8.24
  -1 -29  -4   -0.73    8.90
   1  29   4    9.95    8.88
   1 -29   5    1.42    7.19
   1 -29   5    8.04    7.95
  -1 -29  -5   -7.44    8.91
   1  29   5   17.43    8.98
   1 -29   6    0.61    6.38
   1 -29   6   -1.68    5.84
  -1 -29  -6  -13.88    8.64
   1  29   6   -4.32    9.57
   1 -29   7    1.17    6.53
   1 -29   7   16.24    6.59
  -1 -29  -7   18.61    8.31
   1  29   7   18.96    8.35
   1 -30  -6   23.72    7.71
  -1 -30   6    8.57    6.47
  -1  30   6   29.47    8.73
   1 -30  -5    1.68    8.19
  -1 -30   5   10.35    7.54
  -1 -30   5   17.43    6.91
  -1  30   5    9.22    8.78
   1 -30  -4   61.18   10.43
  -1 -30   4   55.77    8.72
  -1 -30   4   74.95    9.28
  -1  30   4   55.17    9.59
   1 -30  -3   -5.34    8.71
  -1 -30   3    6.44    7.38
  -1 -30   3   26.20    7.78
  -1  30   3    2.03    8.02
   1 -30  -2   53.47    9.18
  -1 -30   2   84.71    9.78
  -1 -30   2   81.75    9.05
  -1  30   2   82.69   10.45
   1 -30  -1    2.91    8.69
  -1 -30   1  -14.34    7.65
  -1 -30   1   -8.03    8.06
  -1  30   1  -11.58    8.91
   1 -30   0   94.58   10.45
   1 -30   0  114.60   10.43
  -1 -30   0   99.23   11.11
  -1 -30   0  102.30   10.32
   1  30   0  111.60   10.40
  -1  30   0  128.20   11.15
   1 -30   1   50.66    8.49
   1 -30   1   34.05    8.16
  -1 -30  -1   26.32    9.33
   1  30   1   26.79    7.92
  -1  30  -1   48.77    8.44
   1 -30   2  111.30    9.97
   1 -30   2  114.80   10.43
  -1 -30  -2  102.60   10.75
   1  30   2  122.00   11.09
   1 -30   3    1.26    7.51
   1 -30   3    6.02    7.68
  -1 -30  -3   -8.89   10.05
   1  30   3    1.86    8.45
   1 -30   4    6.31    7.16
   1 -30   4   -6.99    7.07
  -1 -30  -4    0.92    7.81
   1  30   4    1.38    8.27
   1 -30   5    6.06    6.53
   1 -30   5   10.91    7.06
  -1 -30  -5   -7.09    7.56
   1  30   5    9.86    9.95
   1 -30   6    2.99    6.56
   1 -30   6   13.05    6.48
  -1 -30  -6   -9.28    7.58
   1  30   6   -3.73    8.59
   1 -31  -5   28.97    7.11
  -1 -31   5   47.00    9.23
  -1 -31   5   36.17    8.85
  -1  31   5   28.74    9.05
   1 -31  -4   -7.54    7.75
  -1 -31   4   -4.92    8.29
  -1 -31   4   -1.24    6.13
  -1  31   4  -10.55    8.43
   1 -31  -3    7.60    9.20
  -1 -31   3   -8.48    7.59
  -1 -31   3    3.69    7.39
  -1  31   3   -7.28    8.46
   1 -31  -2   13.17    7.85
  -1 -31   2   -5.58    7.81
  -1 -31   2   -2.41    7.56
  -1  31   2    1.02    9.03
   1 -31  -1   -1.66    8.42
  -1 -31   1   -3.18    8.03
  -1 -31   1   10.33    7.64
  -1  31   1    9.16    8.42
   1 -31   0   10.17    7.62
   1 -31   0    9.28    8.46
  -1 -31   0   12.27    8.32
  -1 -31   0    7.13    8.45
   1  31   0    3.35    7.41
  -1  31   0   22.02    8.17
   1 -31   1  188.40   12.95
   1 -31   1  190.40   12.89
  -1 -31  -1  211.30   14.75
   1  31   1  169.30   12.50
   1 -31   2   19.54    7.07
   1 -31   2   25.24    8.24
  -1 -31  -2    8.14    8.74
   1  31   2   25.42    8.34
   1 -31   3    8.70    7.07
   1 -31   3    7.98    7.04
  -1 -31  -3   -1.23    9.11
   1  31   3   14.68    8.53
   1 -31   4    6.79    6.91
   1 -31   4   12.82    7.17
  -1 -31  -4    0.49    7.90
   1  31   4   -8.46    8.21
   1 -31   5    3.07    7.39
   1 -31   5   -1.07    6.12
  -1 -31  -5    9.96    7.56
   1  31   5    3.23    8.30
   1 -32  -4    4.62    8.25
  -1 -32   4   32.18    9.51
  -1 -32   4   14.19   10.50
  -1  32   4  -12.40    7.60
   1 -32  -3   10.69    7.96
  -1 -32   3   13.53    8.34
  -1 -32   3    5.17    7.61
  -1  32   3   -9.76    7.81
   1 -32  -2    4.04    6.91
  -1 -32   2   -8.55    7.30
  -1 -32   2   -2.63    7.14
  -1  32   2    3.89    8.20
   1 -32  -1    2.20    7.77
  -1 -32   1    8.62    7.78
  -1 -32   1    0.88    7.42
  -1  32   1    8.35    7.56
   1 -32   0    3.65    7.24
   1 -32   0   16.59    7.70
  -1 -32   0   38.53    8.30
  -1 -32   0   18.66    8.11
   1  32   0   20.91    7.41
  -1  32   0    7.07    8.09
   1 -32   1    5.20    7.01
   1 -32   1   18.17    7.45
  -1 -32  -1    8.32    6.96
  -1 -32  -1   21.21    8.78
   1  32   1    7.23    7.38
   1 -32   2  104.00    9.14
   1 -32   2   99.82    9.25
  -1 -32  -2  111.30   10.14
   1  32   2  110.90   10.22
   1 -32   3    4.59    8.35
   1 -32   3   -3.48    6.30
  -1 -32  -3   12.29    8.93
   1  32   3   -3.33    7.85
   1 -32   4   -2.76    7.71
   1  32   4    1.26    7.40
   1 -33  -2    9.75    6.69
  -1 -33   2    4.55    9.43
  -1 -33   2    9.95    7.32
  -1  33   2   13.72    7.33
   1 -33  -1    5.98    7.18
   1 -33  -1    1.49    8.46
  -1 -33   1    8.37    7.92
  -1 -33   1  -18.99    8.28
  -1  33   1   -2.03    6.16
   1 -33   0   -2.04    6.96
   1 -33   0   -0.87    6.90
  -1 -33   0   -4.01    7.81
  -1 -33   0  -17.15    8.11
   1  33   0    1.66    6.13
  -1  33   0    6.67    6.03
   1 -33   1   43.27    7.91
   1 -33   1   22.12    6.96
  -1 -33  -1   24.27    7.53
  -1 -33  -1   30.80    7.91
   1  33   1   21.86    6.56
   1 -33   2   -3.90    7.13
   1 -33   2   -1.87    6.89
  -1 -33  -2   -9.34    7.68
   1  33   2   -2.07    6.32
   2   0 -15   -0.44    6.30
  -2   0  15    2.81    8.04
   2   0 -14    2.89    8.54
  -2   0  14    2.02    8.47
   2   0 -13    5.24    8.67
  -2   0  13   15.87    9.69
   2   0 -12   77.52   10.96
  -2   0  12  102.40   10.23
   2   0 -11   57.88   11.32
  -2   0  11   82.84   10.62
   2   0 -10   62.05   11.54
  -2   0  10   50.94   10.10
   2   0  -9    2.95    8.77
  -2   0   9  -16.59    9.74
   2   0  -8   25.98    8.39
  -2   0   8   16.53   10.21
   2   0  -7    5.89    7.93
  -2   0   7    1.76    9.38
   2   0  -6  772.10   40.08
  -2   0   6  801.40   41.90
   2   0  -4 1811.00   89.77
  -2   0   4 2006.00   99.48
   2   0  -3   26.11   10.18
  -2   0   3    2.53   10.28
   2   0  -2  585.60   30.48
  -2   0   2  547.60   28.74
   2   0  -1    1.48    4.90
  -2   0   1   -0.04    5.10
   2   0   1   19.71    6.19
  -2   0  -1   12.50    5.89
   2   0   2  468.50   25.15
  -2   0  -2  407.30   22.17
   2   0   3   19.42    8.27
  -2   0  -3    1.59    7.01
   2   0   4 2452.00  120.60
  -2   0  -4 2770.00  136.40
   2   0   5    4.46    8.02
  -2   0  -5   -1.85    9.13
   2   0   6   31.22    9.33
  -2   0  -6   45.65    8.77
   2   0   7   -5.56    8.96
  -2   0  -7   -3.22    7.98
   2   0   8  114.10   11.82
  -2   0  -8  122.80   10.75
   2   0   9    6.65    8.61
  -2   0  -9   11.33    9.08
   2   0  10  558.70   30.39
  -2   0 -10  593.90   31.80
   2   0  11   22.50    8.47
  -2   0 -11    0.16    8.76
   2   0  12   48.58    8.71
  -2   0 -12   28.09    8.67
   2   0  13  -12.55    8.08
  -2   0 -13   -3.28    7.20
   2   0  14  -13.53    7.23
  -2   0 -14   -1.13    6.66
   2  -1 -15   11.96    6.58
  -2  -1  15    0.36    7.58
   2   1 -15    0.93    6.52
  -2   1  15    7.31    7.43
   2  -1 -14   -9.88    9.01
  -2  -1  14   -3.10    7.97
   2   1 -14   -1.55    7.68
  -2   1  14   -3.05    8.25
   2  -1 -13   33.54    9.58
  -2  -1  13   40.14    8.90
   2   1 -13   42.27    9.34
  -2   1  13   46.41   10.28
   2  -1 -12   12.33   10.03
  -2  -1  12   19.09    8.13
   2   1 -12   41.53   10.15
  -2   1  12   24.57    9.09
   2  -1 -11  382.30   23.16
  -2  -1  11  310.00   18.54
   2   1 -11  362.30   21.49
  -2   1  11  330.30   20.21
   2  -1 -10   18.37    9.12
  -2  -1  10    0.60    9.40
   2   1 -10   15.73   10.68
  -2   1  10   12.47    9.61
   2  -1  -9   50.22    9.98
  -2  -1   9   32.07   10.32
   2   1  -9   35.81    9.96
  -2   1   9   51.86   10.79
   2  -1  -8  129.50   11.36
  -2  -1   8  153.70   13.14
   2   1  -8  138.40   11.70
  -2   1   8  121.40   12.00
   2  -1  -7   80.93   10.13
  -2  -1   7   82.22   11.45
   2   1  -7   64.02    8.95
  -2   1   7   69.51   10.57
   2  -1  -5 1415.00   70.79
  -2  -1   5 1428.00   71.42
   2   1  -5 1392.00   69.57
  -2   1   5 1431.00   71.68
   2  -1  -3  520.90   28.83
  -2  -1   3  467.70   26.32
   2   1  -3  480.20   26.69
  -2   1   3  467.10   26.30
   2  -1  -2 2150.00  105.80
  -2  -1   2 2329.00  114.50
   2   1  -2 2220.00  109.10
  -2   1   2 2594.00  127.70
  -2  -1   1 5204.00  253.80
   2  -1   0  833.30   41.33
  -2   1   0  841.60   41.78
   2  -1   1 2868.00  140.40
  -2  -1  -1 2801.00  137.00
   2   1   1 2543.00  124.40
  -2   1  -1 2599.00  127.30
   2   1   2  116.00   10.19
  -2   1  -2  101.50   10.04
   2   1   3  861.40   43.69
  -2   1  -3  870.30   43.94
   2  -1   4   51.38    8.20
  -2  -1  -4   42.11    8.04
   2   1   4   60.07    8.83
  -2   1  -4   44.41    8.22
   2  -1   5   18.67    7.91
  -2  -1  -5   33.61    8.51
   2   1   5   33.37    8.80
  -2   1  -5   36.34    7.78
   2  -1   6   20.59    8.89
  -2  -1  -6    7.68    8.31
   2   1   6   21.15    9.27
  -2   1  -6   14.85    7.47
   2  -1   7   -3.26    8.67
  -2  -1  -7   14.13    8.62
   2   1   7   -1.54    8.83
  -2   1  -7    5.58    8.26
   2  -1   8   71.79    9.87
  -2  -1  -8   54.59    9.25
   2   1   8   70.91   10.67
  -2   1  -8   84.99   10.19
   2   1  10    8.43    9.50
  -2   1 -10    1.60    8.63
   2  -1  11   88.26    9.81
  -2  -1 -11   74.70   10.54
   2   1  11   86.34   10.39
  -2   1 -11   80.13    9.94
   2  -1  12    8.50    7.96
  -2  -1 -12   11.51    8.44
   2   1  12   20.95    9.15
  -2   1 -12    2.44    8.14
   2  -1  13    5.24    7.59
  -2  -1 -13   -3.40    7.70
   2   1  13    3.32    8.66
  -2   1 -13    3.23    7.24
   2  -1  14   -0.96    6.72
  -2  -1 -14    1.47    6.27
   2   1  14    2.33    7.41
  -2   1 -14    5.03    6.18
   2  -2 -15   -0.48    7.19
  -2  -2  15    1.24    7.03
   2   2 -15    4.73    6.18
  -2   2  15    1.98    8.00
   2  -2 -14    7.11    9.19
  -2  -2  14   -3.84    7.62
   2   2 -14   -2.98    7.08
  -2   2  14   -4.49    8.79
   2  -2 -13   -1.85    9.68
  -2  -2  13    8.11    8.93
   2   2 -13   11.24    7.80
  -2   2  13    1.75    9.36
   2  -2 -12   78.69   11.45
  -2  -2  12   56.84    8.54
   2   2 -12  101.40   11.31
  -2   2  12   71.41   10.69
   2  -2 -10   72.90   11.28
  -2  -2  10   78.22   10.64
   2   2 -10   65.65   10.49
  -2   2  10   69.81   10.93
   2  -2  -9   10.11    9.27
  -2  -2   9    3.74   10.13
   2   2  -9   20.56   10.21
  -2   2   9   -5.33    9.97
   2  -2  -8   38.13    9.37
  -2  -2   8   61.42   10.45
   2   2  -7   23.03    9.27
  -2   2   7   -9.98    9.06
   2   2  -6   63.41    9.37
  -2   2   6   34.01   10.12
   2  -2  -4  833.80   43.19
  -2  -2   4  739.20   38.48
   2   2  -4  712.90   36.65
  -2   2   4  782.60   40.78
   2   2  -3  120.30   10.96
  -2   2   3  127.00   13.01
   2  -2  -2 2979.00  146.20
  -2  -2   2 3047.00  149.40
   2   2  -2 3260.00  159.70
  -2   2   2 3021.00  148.30
   2  -2  -1   35.96    6.90
  -2  -2   1   35.87    4.93
   2   2  -1   40.70    5.28
  -2   2   1   43.82    8.21
   2  -2   0 1038.00   51.60
  -2  -2   0 1120.00   55.35
   2   2   0 1061.00   52.47
  -2   2   0 1098.00   54.55
   2  -2   1 1452.00   71.94
   2  -2   1 1412.00   69.99
  -2  -2  -1 1264.00   62.26
   2  -2   2 2246.00  111.00
  -2  -2  -2 2092.00  103.00
   2   2   2 2032.00  100.10
  -2   2  -2 1926.00   95.19
   2  -2   3   47.96    8.17
  -2  -2  -3   47.67    7.44
   2   2   3   61.69    9.38
  -2   2  -3   51.05    8.61
   2  -2   4 3312.00  162.40
  -2  -2  -4 3039.00  149.20
   2   2   4 2816.00  138.40
  -2   2  -4 2939.00  144.50
   2  -2   5  701.40   36.27
  -2  -2  -5  601.20   31.52
   2   2   5  558.70   29.91
  -2   2  -5  603.80   31.90
   2   2   6  330.30   19.97
  -2   2  -6  315.80   18.44
   2  -2   7   68.92    9.71
  -2  -2  -7   59.90    9.19
   2   2   7   47.46    9.52
  -2   2  -7   50.19    8.50
   2  -2   8    7.75    8.34
  -2  -2  -8   11.12    9.29
   2   2   8   -4.40    9.16
  -2   2  -8    8.42    7.88
   2  -2   9   50.80    8.89
  -2  -2  -9   32.82   10.32
   2   2   9   38.80   10.41
  -2   2  -9   35.98    9.19
   2  -2  11   27.68    8.76
  -2  -2 -11   12.47    9.16
   2   2  11   31.74    9.63
  -2   2 -11   20.73    9.05
   2  -2  12   73.86    9.06
  -2  -2 -12   52.33    9.26
   2   2  12   55.37    9.93
  -2   2 -12   41.65    8.71
   2  -2  13    4.13    7.61
  -2  -2 -13    5.08    7.73
   2   2  13   15.00    8.69
  -2   2 -13  -12.37    7.14
   2  -2  14    4.99    6.30
  -2  -2 -14   -5.31    6.36
   2   2  14    1.99    7.37
  -2   2 -14    4.51    6.12
   2  -3 -15   14.52    6.81
  -2  -3  15    2.16    7.02
   2   3 -15    3.43    5.56
  -2   3  15   -8.68    8.15
   2  -3 -14    8.24    8.99
  -2  -3  14  -10.95    7.45
   2   3 -14   -4.37    6.87
  -2   3  14   -0.36    8.73
   2  -3 -13   52.33   10.33
  -2  -3  13   37.11    9.09
   2   3 -13   39.11    8.11
  -2   3  13   42.51    9.34
   2  -3 -12    4.35    9.97
  -2  -3  12   32.09    8.51
   2   3 -12   32.73    8.49
  -2   3  12   16.54    9.81
   2  -3 -11  296.20   19.38
  -2  -3  11  348.30   20.34
   2   3 -11  331.70   19.82
  -2   3  11  304.10   19.88
   2  -3 -10   32.71   10.58
  -2  -3  10   63.21   10.26
   2   3 -10   40.62   10.10
  -2   3  10   33.72   11.07
   2  -3  -9   22.86    9.09
  -2  -3   9   33.04   10.02
   2   3  -9   33.13    9.81
  -2   3   9   14.40   10.97
   2  -3  -8   -3.81    8.83
  -2  -3   8   11.20    9.02
   2   3  -8    7.05    8.11
  -2   3   8   -3.20    9.46
   2  -3  -7  110.40   11.66
  -2  -3   7  135.60   11.87
   2   3  -7  118.10   12.09
  -2   3   7  130.00   12.70
   2  -3  -6  -13.42    9.16
  -2  -3   6   18.06    9.48
   2   3  -6   -0.17    8.32
  -2   3   6   14.60   11.19
   2  -3  -5 1239.00   62.49
  -2  -3   5 1180.00   59.40
   2   3  -5 1218.00   61.31
  -2   3   5 1272.00   64.35
   2  -3  -4   12.07    9.43
  -2  -3   4   21.99    8.36
   2   3  -4    9.10    8.61
  -2   3   4    1.22    9.61
   2  -3  -3 1465.00   73.46
  -2  -3   3 1455.00   72.64
   2   3  -3 1484.00   74.16
  -2   3   3 1517.00   76.05
   2  -3  -2   17.91   10.37
  -2  -3   2   24.27    9.34
   2   3  -2   -4.27    7.87
  -2   3   2   12.03   12.14
   2  -3  -1 1377.00   68.32
  -2  -3   1 1349.00   66.48
   2   3  -1 1410.00   69.43
  -2   3   1 1472.00   73.10
   2  -3   0  344.10   19.35
  -2  -3   0  334.00   17.23
   2   3   0  356.90   18.42
  -2   3   0  354.60   20.41
   2  -3   1  548.40   29.23
   2  -3   1  444.20   24.86
  -2  -3  -1  497.40   25.68
   2   3   1  513.70   26.63
   2  -3   2  205.90   14.58
  -2  -3  -2  199.00   12.88
   2   3   2  190.80   12.70
  -2   3  -2  171.10   13.02
   2  -3   3 4599.00  225.30
  -2  -3  -3 4145.00  202.90
   2   3   3 3517.00  172.40
  -2   3  -3 4015.00  196.80
   2  -3   4 1114.00   55.81
  -2  -3  -4 1089.00   54.78
   2   3   4 1125.00   56.86
  -2   3  -4 1020.00   51.54
   2  -3   5   50.32    8.37
  -2  -3  -5   47.49    8.48
   2   3   5   42.19    9.29
  -2   3  -5   50.82    9.18
   2  -3   6   25.15    8.19
  -2  -3  -6   19.94    8.15
   2   3   6   26.15    9.40
  -2   3  -6   18.96    8.65
   2  -3   7   38.52    9.41
  -2  -3  -7   46.85    9.48
   2   3   7   41.46    9.61
  -2   3  -7   42.33    8.53
   2  -3   8  178.00   13.17
  -2  -3  -8  195.00   14.30
   2   3   8  172.80   14.06
  -2   3  -8  208.70   14.61
   2  -3  10   -0.98    8.85
  -2  -3 -10    2.75    9.61
   2   3  10   -5.55   11.23
  -2   3 -10   29.02    9.34
   2  -3  11   35.72    8.72
  -2  -3 -11   20.16    9.03
   2   3  11   42.41    9.45
  -2   3 -11   39.24    9.21
   2   3  12   14.73    9.56
  -2   3 -12   23.72    8.34
   2  -3  13   -1.56    6.55
  -2  -3 -13    2.95    8.08
   2   3  13   -3.22    8.36
  -2   3 -13   13.16    7.49
   2  -3  14   -2.45    6.78
  -2  -3 -14    8.23    6.94
   2   3  14  -18.56    7.48
  -2   3 -14   -3.00    5.91
   2  -4 -15    2.24    7.40
  -2  -4  15   -7.02    7.30
   2   4 -15   -0.73    5.78
  -2   4  15   -1.82    8.11
   2  -4 -14   -6.27    9.33
  -2  -4  14   -7.04    6.79
   2   4 -14   -1.05    7.21
  -2   4  14    6.43    8.57
   2  -4 -13   25.64   10.84
  -2  -4  13   41.26    9.08
   2   4 -13   40.07    7.99
  -2   4  13   52.66    9.25
   2  -4 -12   32.38   10.35
  -2  -4  12   39.83    8.72
   2   4 -12   38.63    8.83
  -2   4  12   34.42    9.87
   2   4 -11   18.01    8.34
  -2   4  11   21.67   11.51
   2  -4 -10  143.70   13.24
  -2  -4  10  178.90   14.02
   2   4 -10  131.20   12.28
  -2   4  10  144.30   13.65
   2  -4  -9    6.68    9.51
  -2  -4   9   -5.34    8.80
   2   4  -9    7.82    8.65
  -2   4   9   28.67   11.39
   2  -4  -8   -4.82    9.84
  -2  -4   8    4.10    9.22
   2   4  -8   -5.80    7.66
  -2   4   8    1.61    9.95
   2  -4  -7   26.14    9.96
  -2  -4   7   50.82    9.80
   2   4  -7   51.02    8.72
  -2   4   7   39.45   10.78
   2  -4  -6  204.80   14.78
  -2  -4   6  234.70   15.45
   2   4  -6  236.00   15.46
  -2   4   6  257.00   18.85
   2  -4  -5    1.36    9.67
  -2  -4   5   20.39    8.24
   2   4  -5   23.97    8.23
  -2   4   5    7.89   10.27
   2  -4  -4 2676.00  132.00
  -2  -4   4 2479.00  122.10
   2   4  -4 2439.00  120.10
  -2   4   4 2510.00  123.90
   2  -4  -3  758.40   39.40
  -2  -4   3  797.70   40.90
   2   4  -3  809.30   41.53
  -2   4   3  809.30   42.19
   2  -4  -2  840.30   43.40
  -2  -4   2  799.70   41.06
   2   4  -2  880.30   44.72
  -2   4   2  935.10   48.38
   2  -4  -1   -9.61   10.89
  -2  -4   1   -2.24    7.55
  -2  -4   1    0.29    7.27
  -2   4   1    7.73   10.90
   2  -4   0 1309.00   65.49
  -2  -4   0 1397.00   68.86
   2   4   0 1294.00   63.99
  -2   4   0 1266.00   63.86
   2  -4   1  359.90   21.49
   2  -4   1  323.40   19.20
  -2  -4  -1  316.20   17.38
   2   4   1  297.80   16.95
  -2   4  -1  315.50   19.83
   2  -4   2   27.88    9.76
   2  -4   2   12.08    8.66
  -2  -4  -2   27.46    7.61
   2   4   2   16.24    7.03
  -2   4  -2   12.53    9.31
   2  -4   3   37.65    7.92
  -2  -4  -3   42.96    7.93
   2   4   3   33.46    7.89
  -2   4  -3   26.80    8.74
   2  -4   4 3256.00  160.00
  -2  -4  -4 3133.00  153.90
   2   4   4 3077.00  151.30
  -2   4  -4 3218.00  158.30
   2  -4   5  723.20   37.39
  -2  -4  -5  652.60   34.23
   2   4   5  622.90   33.02
  -2   4  -5  632.60   33.58
   2  -4   6   32.49    8.66
  -2  -4  -6   15.24    8.32
   2   4   6   12.81    9.04
  -2   4  -6    9.51    8.45
   2  -4   7   11.83    9.10
  -2  -4  -7   11.02    8.29
   2   4   7    4.96    9.20
  -2   4  -7    6.43    9.02
   2  -4   8    2.71    8.98
  -2  -4  -8   -2.57    8.62
   2   4   8    1.40   10.43
  -2   4  -8   -4.48    9.07
   2  -4   9  182.10   13.25
  -2  -4  -9  161.60   14.32
   2   4   9  143.70   14.10
  -2   4  -9  160.10   12.96
   2  -4  10  245.60   15.72
  -2  -4 -10  218.80   15.61
   2  -4  11   34.62    9.01
  -2  -4 -11   12.52    9.07
   2   4  11   32.27    9.30
  -2   4 -11   30.47    9.05
   2  -4  12   54.10    8.71
  -2  -4 -12   36.90    9.86
   2   4  12   41.17    9.62
  -2   4 -12   36.93    8.67
   2  -4  13   -7.45    6.77
  -2  -4 -13   -4.14    8.20
   2   4  13    3.35    8.48
  -2   4 -13   -1.41    7.07
   2  -4  14    3.01    6.99
  -2  -4 -14  -12.20    7.04
   2   4  14    1.80    7.58
  -2   4 -14   -0.42    6.02
   2  -5 -15   -0.90    7.25
  -2  -5  15   -1.98    6.48
   2   5 -15   -0.85    5.76
  -2   5  15    4.00    7.23
   2  -5 -14   -5.20    9.60
  -2  -5  14   -7.09    7.60
   2   5 -14    4.78    6.87
  -2   5  14   -5.63    8.48
   2  -5 -13   56.31   10.43
  -2  -5  13   77.03    9.53
   2   5 -13   79.05    9.08
  -2   5  13   55.96    9.96
   2  -5 -12   67.71   11.38
  -2  -5  12   55.40    9.44
   2   5 -12   64.80    9.41
  -2   5  12   61.12   10.29
   2  -5 -11  104.00   12.43
  -2  -5  11   90.90   10.93
   2   5 -11  107.60   10.84
  -2   5  11   95.27   11.90
   2  -5 -10  102.10   12.28
  -2  -5  10   91.05   11.35
   2   5 -10   89.38    9.94
  -2   5  10  101.30   12.77
   2  -5  -9   15.75   10.11
  -2  -5   9   16.34    9.32
   2   5  -9   -4.13    7.68
  -2   5   9   -6.12   10.29
   2  -5  -8   32.25    9.98
  -2  -5   8   52.88   10.10
   2   5  -8   28.33    8.25
  -2   5   8   29.18   10.04
   2  -5  -7   29.80    9.89
  -2  -5   7   37.50    9.07
   2   5  -7   26.06    8.15
  -2   5   7   22.54   10.09
   2  -5  -6  249.40   16.61
  -2  -5   6  294.60   18.04
   2   5  -6  233.90   15.28
  -2   5   6  273.30   18.69
   2  -5  -5 1134.00   57.63
  -2  -5   5 1021.00   51.55
   2   5  -5 1079.00   54.50
  -2   5   5 1133.00   57.69
   2  -5  -4   -4.25    9.30
  -2  -5   4    8.32    8.39
   2   5  -4    2.28    7.70
  -2   5   4    5.04    9.89
   2  -5  -3  933.20   47.68
  -2  -5   3 1089.00   55.16
   2   5  -3 1052.00   53.18
  -2   5   3 1037.00   52.99
   2  -5  -2  367.90   22.27
  -2  -5   2  347.80   20.26
   2   5  -2  336.80   19.90
  -2   5   2  367.80   23.14
   2  -5  -1 1235.00   62.32
  -2  -5   1 1202.00   60.16
  -2  -5   1 1219.00   60.98
  -2   5   1 1089.00   55.31
   2  -5   0    7.27   11.56
  -2  -5   0   -7.41    7.20
   2   5   0   -6.26    8.98
  -2   5   0   -4.63   12.93
   2  -5   1  269.10   18.40
   2  -5   1  259.40   17.99
  -2  -5  -1  253.30   15.38
   2   5   1  213.10   13.98
  -2   5  -1  205.00   15.77
   2  -5   2   52.33   10.18
   2  -5   2   65.20    9.73
  -2  -5  -2   75.31    9.01
   2   5   2   61.54    8.94
   2  -5   3   77.77    9.68
  -2  -5  -3   66.43    8.85
   2   5   3   64.13    8.39
  -2   5  -3   69.15    9.87
   2  -5   4  225.00   14.97
  -2  -5  -4  253.70   15.98
   2   5   4  219.20   15.12
  -2   5  -4  211.70   14.41
   2  -5   5  908.80   46.43
  -2  -5  -5  923.70   47.20
   2   5   5  954.00   48.65
  -2   5  -5 1008.00   51.62
   2  -5   6  297.00   17.80
  -2  -5  -6  281.90   17.84
   2   5   6  281.40   17.73
  -2   5  -6  267.20   17.17
   2  -5   7   61.75   10.01
  -2  -5  -7   67.10   10.32
   2   5   7   52.68   10.17
  -2   5  -7   48.64    9.74
   2  -5   8  101.20   11.14
  -2  -5  -8   77.58   10.31
   2   5   8   59.62   11.01
  -2   5  -8   81.37   10.84
   2  -5   9  238.60   15.50
  -2  -5  -9  245.70   16.94
   2   5   9  215.70   16.86
  -2   5  -9  234.80   16.28
   2  -5  10   40.36    8.36
  -2  -5 -10   34.15   10.82
   2   5  10   66.30   11.12
  -2   5 -10   50.65    8.96
   2  -5  11    3.79    8.29
  -2  -5 -11   20.65    9.93
   2   5  11    2.83    8.75
  -2   5 -11   32.64    8.36
   2  -5  12   44.73    8.63
  -2  -5 -12   26.42    9.45
   2   5  12   66.39   10.48
  -2   5 -12   84.76   10.22
   2  -5  13   14.19    7.09
  -2  -5 -13   -1.15    7.94
   2   5  13   -0.22    8.23
  -2   5 -13   -3.43    6.70
   2  -6 -15    5.76    7.76
  -2  -6  15    5.57    6.21
   2   6 -15    0.17    6.17
  -2   6  15   -3.14    6.97
   2  -6 -14    1.04   10.24
  -2  -6  14    0.90    7.06
   2   6 -14    9.26    6.63
  -2   6  14    0.16    7.98
   2  -6 -13   21.68    9.47
  -2  -6  13   32.25    7.92
   2   6 -13   33.58    8.42
  -2   6  13   32.74    9.93
   2  -6 -12   42.37   10.92
  -2  -6  12   52.19    9.59
   2   6 -12   49.46    8.78
  -2   6  12   38.57   10.82
   2  -6 -11  -19.57   10.30
  -2  -6  11    2.05    9.00
   2   6 -11    0.37    7.98
  -2   6  11    4.70   10.65
   2  -6 -10   23.70   10.44
  -2  -6  10    7.44    9.06
   2   6 -10    4.40    8.56
  -2   6  10   11.21   10.02
   2  -6  -9  202.10   15.68
  -2  -6   9  197.60   14.59
   2   6  -9  202.40   14.26
  -2   6   9  195.70   15.44
   2  -6  -8  107.10   11.91
  -2  -6   8  130.50   11.90
   2   6  -8  152.00   12.48
  -2   6   8  122.00   13.17
   2  -6  -7  155.80   13.58
  -2  -6   7  189.80   13.61
   2   6  -7  172.60   13.25
  -2   6   7  180.10   14.68
   2  -6  -6   21.25    9.91
  -2  -6   6   25.81    8.11
   2   6  -6   29.95    8.75
  -2   6   6   34.26   10.88
   2  -6  -5  441.70   25.20
  -2  -6   5  438.50   23.98
   2   6  -5  423.60   23.67
  -2   6   5  386.50   22.62
   2  -6  -4  883.80   45.36
  -2  -6   4  974.90   49.60
   2   6  -4  938.40   47.76
  -2   6   4  942.20   48.55
   2  -6  -3   61.82    9.72
  -2  -6   3   33.04    7.80
   2   6  -3   31.32    8.48
  -2   6   3   41.20   11.39
  -2  -6   2  260.10   16.76
  -2  -6   2  226.60   15.15
   2   6  -2  208.20   14.05
  -2   6   2  208.30   16.11
   2  -6  -1 1480.00   74.05
  -2  -6   1 1570.00   78.02
  -2  -6   1 1518.00   75.47
  -2   6   1 1520.00   76.44
   2  -6   0   49.06   11.26
  -2  -6   0   52.13    8.96
   2   6   0   53.70    9.87
  -2   6   0   63.10   13.31
   2  -6   1   26.79   10.10
  -2  -6  -1   25.19    7.61
   2   6   1   11.45    7.98
  -2   6  -1   11.55   10.30
   2  -6   2   21.36    8.65
   2  -6   2   31.57    9.06
  -2  -6  -2   11.07    7.86
   2   6   2    8.72    8.05
   2  -6   3    7.45    8.64
   2  -6   3   16.58    9.17
  -2  -6  -3    5.49    8.26
   2   6   3   18.00    8.67
  -2   6  -3   15.20    9.23
   2  -6   4  519.10   27.72
  -2  -6  -4  491.00   26.55
   2   6   4  487.50   26.53
  -2   6  -4  517.30   28.10
   2  -6   5  100.00   10.69
  -2  -6  -5   75.58    9.95
   2   6   5   83.21    9.60
  -2   6  -5  100.30   10.70
   2  -6   6  501.60   27.23
  -2  -6  -6  521.80   28.61
   2   6   6  490.10   26.95
  -2   6  -6  432.90   24.26
   2  -6   7  111.40   11.17
  -2  -6  -7   76.47   11.08
   2   6   7   84.74   11.22
  -2   6  -7  109.20   11.89
   2  -6   8   29.03    9.28
  -2  -6  -8   19.20   10.04
   2   6   8   37.84   10.92
  -2   6  -8   29.39    9.46
   2  -6   9  155.40   11.75
  -2  -6  -9  162.80   13.81
   2   6   9  165.40   14.64
  -2   6  -9  154.00   12.96
   2  -6  10  148.50   11.53
  -2  -6 -10  150.60   12.93
   2   6  10  150.10   13.20
  -2   6 -10  181.10   13.51
   2  -6  11   49.36    8.89
  -2  -6 -11   17.03   10.13
   2   6  11   50.91    9.52
  -2   6 -11   55.25    8.50
   2  -6  12   64.10    9.09
  -2  -6 -12   53.22   10.86
   2   6  12   44.92    9.93
  -2   6 -12   67.64    8.97
   2  -6  13    6.76    6.65
  -2  -6 -13   10.05    8.34
   2   6  13    9.51    7.91
  -2   6 -13    2.65    6.49
   2  -7 -14    4.23    9.12
  -2  -7  14    1.47    6.63
   2   7 -14   11.59    6.88
  -2   7  14   -4.83    8.20
   2  -7 -13   24.99   10.29
  -2  -7  13   42.97    8.16
   2   7 -13   27.92    8.58
  -2   7  13   29.96    9.86
   2  -7 -12   78.62   11.64
  -2  -7  12   81.44   10.01
   2   7 -12   59.18    8.86
  -2   7  12   80.27   10.65
   2  -7 -11  143.50   13.59
  -2  -7  11  106.80   11.25
   2   7 -11  129.00   11.27
  -2   7  11  115.60   12.46
   2  -7 -10   41.58   10.94
  -2  -7  10   29.40    8.97
   2   7 -10   33.60    9.21
  -2   7  10   32.52   10.56
   2  -7  -9   44.69   10.82
  -2  -7   9   28.66    8.72
   2   7  -9   31.46    9.46
  -2   7   9   38.65   10.24
   2  -7  -8  311.40   20.13
  -2  -7   8  367.60   21.53
   2   7  -8  373.20   21.70
  -2   7   8  346.90   21.49
   2  -7  -7  664.60   35.99
  -2  -7   7  744.00   38.72
   2   7  -7  741.70   39.00
  -2   7   7  677.70   36.03
   2  -7  -6 1431.00   72.10
  -2  -7   6 1331.00   66.68
   2   7  -6 1380.00   69.29
  -2   7   6 1408.00   70.91
   2  -7  -5  187.00   14.62
  -2  -7   5  167.60   12.69
   2   7  -5  189.70   14.19
  -2   7   5  170.70   15.22
   2  -7  -4  -12.37    9.57
  -2  -7   4    9.95    8.71
   2   7  -4   -3.96    8.46
  -2   7   4   -1.60    9.24
   2  -7  -3  204.80   14.69
  -2  -7   3  205.80   13.89
   2   7  -3  190.30   13.44
  -2   7   3  205.00   15.52
   2  -7  -2  507.30   27.60
  -2  -7   2  563.30   29.98
  -2  -7   2  557.20   29.76
  -2   7   2  565.70   31.04
   2  -7  -1  533.30   29.12
  -2  -7   1  548.00   29.07
  -2  -7   1  565.80   30.12
   2   7  -1  575.70   30.72
  -2   7   1  557.70   31.12
   2  -7   0  252.00   17.10
  -2  -7   0  243.00   15.46
   2   7   0  236.30   15.55
  -2   7   0  237.90   18.06
   2  -7   1  349.20   20.93
  -2  -7  -1  375.20   20.91
   2   7   1  375.10   21.27
  -2   7  -1  349.10   21.09
   2  -7   2   36.25    9.85
   2  -7   2   16.34    9.62
  -2  -7  -2    9.34    7.23
   2   7   2   10.38    8.62
   2  -7   3  204.10   14.96
   2  -7   3  164.50   13.28
  -2  -7  -3  147.20   11.64
   2   7   3  176.10   12.47
  -2   7  -3  179.00   12.89
   2  -7   4   97.93    9.69
   2  -7   4   73.29    9.99
  -2  -7  -4  115.20   11.23
   2   7   4   99.98   11.78
  -2   7  -4   90.68   11.15
   2   7   5  176.30   12.53
  -2   7  -5  184.30   14.15
   2  -7   6  226.60   15.00
  -2  -7  -6  192.30   14.36
   2   7   6  203.90   14.47
  -2   7  -6  226.80   15.40
   2  -7   7  474.70   26.22
  -2  -7  -7  485.30   27.48
   2   7   7  490.20   27.48
  -2   7  -7  499.30   27.42
   2  -7   8   55.68    9.93
  -2  -7  -8   32.79   10.31
   2   7   8   38.99   11.26
  -2   7  -8   46.22    9.09
   2  -7   9   32.35    7.91
  -2  -7  -9   41.21   10.76
   2   7   9   38.78   10.89
  -2   7  -9   51.43    9.53
   2  -7  10   25.34    8.09
  -2  -7 -10   19.56   10.20
   2   7  10   18.64    8.95
  -2   7 -10   29.82    8.14
   2  -7  11   -2.85    7.86
  -2  -7 -11    7.04    9.60
   2   7  11    5.97    8.47
  -2   7 -11    8.26    7.59
   2  -7  12   18.66    7.84
  -2  -7 -12    6.29   10.79
   2   7  12   26.20    8.60
  -2   7 -12   39.84    8.04
   2  -7  13   13.04    6.64
  -2  -7 -13    4.37    8.50
   2   7  13   13.25    9.29
  -2   7 -13    5.41    6.60
   2  -8 -14   -6.27    8.85
  -2  -8  14    3.25    6.61
   2   8 -14   -9.74    6.71
  -2   8  14    1.27    8.47
   2  -8 -13   25.58   10.38
  -2  -8  13   30.18    8.25
   2   8 -13   26.58    8.22
  -2   8  13   16.68    8.78
   2  -8 -12   16.38   10.67
  -2  -8  12    6.24    8.22
   2   8 -12   10.42    8.31
  -2   8  12   -1.29    9.58
   2  -8 -11   25.30   10.71
  -2  -8  11   33.26    9.02
   2   8 -11   19.40    8.64
  -2   8  11   15.26   10.30
   2  -8 -10   78.86   11.98
  -2  -8  10   76.46   10.01
   2   8 -10   97.45   10.37
  -2   8  10   83.73   12.28
   2  -8  -9  232.20   16.85
  -2  -8   9  237.20   15.64
   2  -8  -8   56.63   11.16
  -2  -8   8   64.00    9.75
   2   8  -8   59.52    9.97
  -2   8   8   75.69   11.27
   2  -8  -7  181.40   14.82
  -2  -8   7  172.80   12.67
   2   8  -7  189.60   14.27
  -2   8   7  184.10   16.30
   2  -8  -6  323.80   20.11
  -2  -8   6  311.60   18.32
   2   8  -6  287.20   18.14
  -2   8   6  290.00   19.70
   2  -8  -5    2.83    9.59
  -2  -8   5   13.48    8.92
   2   8  -5    0.22    8.97
  -2   8   5    9.42   10.84
   2   8  -4   -1.15    8.92
  -2   8   4   20.44   11.17
   2  -8  -3   69.36   10.67
  -2  -8   3   85.45    9.44
  -2  -8   3   86.02    9.96
   2   8  -3   58.20    9.37
  -2   8   3   82.68   11.58
   2  -8  -2    2.33    9.95
  -2  -8   2   11.90    8.85
  -2  -8   2    7.14    8.11
  -2   8   2   13.23   10.88
   2  -8  -1 1033.00   52.54
  -2  -8   1 1065.00   53.61
  -2  -8   1 1008.00   50.83
   2   8  -1 1066.00   54.03
  -2   8   1 1006.00   51.59
   2  -8   0   39.10   10.98
  -2  -8   0   45.86    9.20
   2   8   0   27.91    9.19
  -2   8   0   48.57   11.86
   2  -8   1   15.38    9.44
  -2  -8  -1   19.39    8.28
   2   8   1    7.80    8.70
  -2   8  -1   21.15   11.05
   2  -8   2   68.34   11.01
   2  -8   2   65.29    9.76
  -2  -8  -2   52.57    8.06
   2   8   2   44.05    8.49
   2  -8   3  315.70   19.14
   2  -8   3  307.30   18.90
  -2  -8  -3  303.50   18.46
   2   8   3  329.10   19.83
   2  -8   4  501.50   27.22
   2  -8   4  559.00   30.18
  -2  -8  -4  487.40   26.77
   2   8   4  473.40   26.19
  -2   8  -4  477.90   26.62
   2  -8   5  616.80   32.54
  -2  -8  -5  604.70   32.47
   2   8   5  642.10   33.92
  -2   8  -5  585.70   31.65
   2  -8   6  342.10   21.08
  -2  -8  -6  321.80   20.21
   2   8   6  301.50   18.51
  -2   8  -6  326.30   19.76
   2  -8   7   54.57   10.23
  -2  -8  -7   49.23   10.78
   2   8   7   50.66    9.92
  -2   8  -7   32.16    9.87
   2  -8   8    8.25    8.59
  -2  -8  -8   -7.17    9.48
   2   8   8   -0.12    9.76
  -2   8  -8   -8.78    8.87
   2  -8   9    8.44    8.24
  -2  -8  -9   12.24   10.54
   2   8   9    9.88    9.98
  -2   8  -9    7.92    8.37
   2  -8  10   40.81    8.14
  -2  -8 -10   27.06   10.25
   2   8  10   36.99    9.06
  -2   8 -10   11.14    8.27
   2  -8  11   31.32    8.21
  -2  -8 -11   28.39    9.51
   2   8  11   21.87    9.32
  -2   8 -11   25.90    7.79
   2  -8  12   92.94    9.57
  -2  -8 -12   87.47   11.86
   2   8  12   76.42   10.72
  -2   8 -12   74.11    8.77
   2  -8  13    3.41    6.65
  -2  -8 -13    3.52    9.12
   2   8  13   12.35    8.96
  -2   8 -13   -2.72    6.70
   2  -9 -14    5.08    8.62
  -2  -9  14  -13.81    7.05
   2   9 -14  -12.34    6.31
  -2   9  14  -12.61    9.35
   2  -9 -13   24.13   10.46
  -2  -9  13   30.59    8.28
   2  -9 -12  142.80   13.75
  -2  -9  12  148.90   11.68
   2   9 -12  158.60   11.90
  -2   9  12  165.30   15.53
   2  -9 -11    1.85   10.61
  -2  -9  11   15.40    8.39
   2   9 -11    8.02    7.80
  -2   9  11   15.19   11.29
   2  -9 -10   25.21   10.94
  -2  -9  10   19.35    8.72
   2   9 -10   17.95    8.90
  -2   9  10   42.10   12.45
   2   9  -9   19.09    9.46
  -2   9   9   19.97   11.80
   2  -9  -8  112.60   12.66
  -2  -9   8  116.00   11.56
   2   9  -8  118.00   11.36
  -2   9   8  110.00   13.65
   2  -9  -7  191.30   15.14
  -2  -9   7  171.00   12.45
   2   9  -7  185.30   14.09
  -2   9   7  221.30   16.90
   2  -9  -6  329.10   20.73
  -2  -9   6  396.30   22.42
   2   9  -6  385.60   22.28
  -2   9   6  363.80   22.18
   2  -9  -5 1032.00   52.84
  -2  -9   5 1040.00   53.00
   2   9  -5 1067.00   54.37
  -2   9   5 1072.00   55.11
   2  -9  -4   21.94   10.25
  -2  -9   4   14.86    7.78
   2   9  -4   31.46    9.66
  -2   9   4   18.53   11.25
   2  -9  -3  993.70   50.90
  -2  -9   3  982.00   50.00
  -2  -9   3 1037.00   52.64
   2   9  -3  918.00   46.82
  -2   9   3  996.70   51.30
   2  -9  -2  324.10   19.91
  -2  -9   2  323.20   18.86
  -2  -9   2  292.80   17.51
  -2   9   2  298.10   19.28
   2  -9  -1  256.50   17.14
  -2  -9   1  262.10   16.91
   2   9  -1  266.50   16.40
  -2   9   1  246.00   17.23
   2  -9   0   43.72   10.35
  -2  -9   0   36.80    8.27
   2   9   0   15.84    9.08
  -2   9   0   30.62   11.28
   2  -9   1 1354.00   68.08
  -2  -9  -1 1338.00   66.73
   2   9   1 1213.00   60.82
  -2   9  -1 1270.00   64.37
   2  -9   2 1342.00   67.50
   2  -9   2 1342.00   67.61
  -2  -9  -2 1428.00   71.20
   2   9   2 1265.00   63.32
   2  -9   3    4.23    9.35
   2  -9   3    5.91    9.84
  -2  -9  -3   11.52    8.70
   2   9   3    8.54    9.60
   2  -9   4  646.80   34.37
   2  -9   4  656.70   34.73
  -2  -9  -4  657.80   34.71
   2   9   4  549.00   29.38
  -2   9  -4  558.90   31.06
   2  -9   5  281.10   17.04
   2  -9   5  247.00   16.31
  -2  -9  -5  267.30   17.34
   2   9   5  232.20   15.76
  -2   9  -5  248.40   16.76
   2  -9   6   80.98   10.72
  -2  -9  -6   45.34   10.25
   2   9   6   76.07   11.10
  -2   9  -6   66.06   10.10
   2  -9   7  266.40   17.15
  -2  -9  -7  271.50   18.22
   2   9   7  253.60   17.99
  -2   9  -7  226.30   16.02
   2  -9   8    7.86    8.36
  -2  -9  -8   25.91   11.48
   2   9   8    8.63   12.08
  -2   9  -8   21.95    9.21
   2  -9   9   79.68   10.37
  -2  -9  -9   76.71   11.86
   2   9   9   76.03   11.72
  -2   9  -9   84.55   10.31
   2  -9  10   13.49    8.05
  -2  -9 -10   23.10    9.78
   2   9  10  -17.25   10.12
  -2   9 -10    5.39    8.43
   2  -9  11    0.25    8.12
  -2  -9 -11   -2.95    8.85
   2   9  11    6.25   10.74
  -2   9 -11   15.45    8.07
   2  -9  12   25.65    7.72
  -2  -9 -12    8.95    9.94
   2   9  12   31.98   10.68
  -2   9 -12   20.38    7.70
   2  -9  13   11.14    6.36
  -2  -9 -13    1.29    9.73
   2   9  13   12.05   10.34
  -2   9 -13    6.53    6.51
   2 -10 -14   18.16    9.16
  -2 -10  14   13.07    6.40
   2  10 -14   30.18    6.54
  -2  10  14   26.39    9.31
   2 -10 -13   40.82   10.87
  -2 -10  13   29.74    8.24
   2  10 -13   37.32    7.53
  -2  10  13   37.64    9.94
   2 -10 -12   -3.24   10.24
  -2 -10  12    6.06    7.57
   2  10 -12   -4.69    7.41
  -2  10  12   -0.05   10.97
   2 -10 -11   21.90   11.00
  -2 -10  11   19.39    8.19
   2  10 -11   12.09    7.47
  -2  10  11   10.86   11.24
   2 -10 -10   76.71   12.21
  -2 -10  10   82.79    9.64
   2  10 -10   76.78    9.35
  -2  10  10  102.20   13.04
   2 -10  -9   87.43   12.05
  -2 -10   9  100.80   10.52
   2  10  -9  102.70   10.82
  -2  10   9  133.70   14.32
   2 -10  -8  150.30   13.61
  -2 -10   8  134.20   11.24
   2  10  -8  143.40   12.11
  -2  10   8  159.70   14.76
   2 -10  -7   10.00   10.97
  -2 -10   7   20.32    8.21
   2  10  -7    9.39    8.41
  -2  10   7    0.05   10.79
   2 -10  -6   22.38   10.47
  -2 -10   6   49.29    9.23
   2  10  -6   36.35    9.53
  -2  10   6   37.74    9.87
   2 -10  -5  133.10   14.49
  -2 -10   5   92.76    9.73
   2  10  -5   85.48   11.52
  -2  10   5  108.70   11.15
   2 -10  -4  439.40   24.67
  -2 -10   4  487.30   26.48
  -2 -10   4  479.60   26.28
   2  10  -4  478.00   26.37
  -2  10   4  486.20   28.18
   2 -10  -3  662.10   35.15
  -2 -10   3  691.60   36.37
  -2 -10   3  654.20   34.46
  -2  10   3  629.80   34.29
   2 -10  -2  132.40   12.69
  -2 -10   2  125.80   11.49
  -2 -10   2  124.30   11.28
  -2  10   2  122.00   12.41
   2  10  -1  310.60   18.36
  -2  10   1  309.10   20.23
   2 -10   0 2724.00  134.30
  -2 -10   0 2661.00  130.90
   2  10   0 2617.00  128.80
  -2  10   0 2559.00  126.50
   2 -10   1 1533.00   76.97
  -2 -10  -1 1566.00   77.92
   2  10   1 1389.00   69.48
  -2  10  -1 1447.00   72.66
   2 -10   2   11.73    9.95
   2 -10   2   18.37   10.99
  -2 -10  -2   22.39    9.49
   2  10   2   12.29    9.26
   2 -10   3   35.18   10.41
   2 -10   3   21.71   10.13
  -2 -10  -3   46.44    9.47
   2  10   3   26.52    8.90
   2 -10   4  112.90   11.91
   2 -10   4  120.10   11.84
  -2 -10  -4  139.30   12.32
   2  10   4  115.40   11.03
   2 -10   5  339.00   20.56
   2 -10   5  308.60   18.42
  -2 -10  -5  358.30   21.25
   2  10   5  332.00   20.10
  -2  10  -5  350.40   21.07
   2 -10   6  220.30   15.45
   2 -10   6  213.10   15.34
  -2 -10  -6  237.50   16.69
   2  10   6  207.00   15.31
  -2  10  -6  218.40   15.29
   2 -10   7   15.14    9.13
   2 -10   7    8.90    8.80
  -2 -10  -7   10.81    9.88
   2  10   7   16.37   10.79
  -2  10  -7    1.22    8.63
   2 -10   8   -7.09    8.49
  -2 -10  -8   -1.11   10.36
   2  10   8    7.67   10.61
  -2  10  -8    1.37    9.39
   2 -10   9   27.95    9.66
  -2 -10  -9   22.12   10.30
   2  10   9    9.50   10.62
  -2  10  -9   28.61    8.51
   2 -10  10   16.78    8.42
  -2 -10 -10   15.27    9.78
   2  10  10   36.91   10.64
  -2  10 -10   28.68    8.62
   2 -10  11   44.76    9.01
  -2 -10 -11   42.18   10.45
   2  10  11   58.88   11.41
  -2  10 -11   61.58    9.23
   2 -10  12   50.30    8.36
  -2 -10 -12   44.06    9.36
   2  10  12   50.71   10.65
  -2  10 -12   50.58    8.00
   2 -10  13  -11.13    6.49
  -2 -10 -13    7.64    9.00
   2  10  13  -16.95    9.12
  -2  10 -13    0.70    6.09
   2 -11 -14   17.87    8.60
  -2 -11  14    3.72    6.52
   2  11 -14    6.03    5.75
  -2  11  14   -5.33    8.84
   2 -11 -13   39.39   11.44
  -2 -11  13   59.66    8.59
   2  11 -13   67.44    8.12
  -2  11  13   68.97    9.93
   2 -11 -12   53.95   11.00
  -2 -11  12   67.52    8.78
   2  11 -12   77.01    8.97
  -2  11  12   73.82   11.92
   2 -11 -11    8.18   10.84
  -2 -11  11    4.33    7.43
   2  11 -11    0.17    7.38
  -2  11  11   -6.66   10.82
   2 -11 -10   11.82   10.52
  -2 -11  10    7.99    8.32
   2  11 -10  -10.27    8.08
  -2  11  10   24.32   10.95
   2 -11  -9   24.70   10.68
  -2 -11   9   16.44    8.54
   2  11  -9   16.16    8.41
  -2  11   9   14.01   10.69
   2 -11  -8  134.70   13.38
  -2 -11   8  152.70   12.29
   2  11  -8  148.30   12.58
  -2  11   8  108.10   12.53
   2 -11  -7  480.40   27.30
  -2 -11   7  516.90   28.14
   2  11  -7  479.90   26.88
  -2  11   7  468.50   26.79
   2 -11  -6  211.10   15.94
  -2 -11   6  216.10   15.31
   2  11  -6  212.80   15.47
  -2  11   6  187.70   14.38
   2 -11  -5  149.90   13.68
  -2 -11   5  155.80   12.72
  -2 -11   5  167.10   12.58
   2  11  -5  153.30   13.40
  -2  11   5  155.10   14.12
   2 -11  -4    1.77    9.85
  -2 -11   4   -5.76    8.06
  -2 -11   4    4.96    8.73
   2  11  -4    0.09    7.87
  -2  11   4    4.71   10.93
   2 -11  -3  150.80   13.46
  -2 -11   3  169.50   13.16
  -2 -11   3  156.30   12.48
  -2  11   3  159.80   15.12
   2 -11  -2 2277.00  112.80
  -2 -11   2 2354.00  116.30
  -2 -11   2 2212.00  109.40
  -2  11   2 2271.00  112.70
   2 -11  -1  554.90   30.39
  -2 -11   1  641.50   34.02
   2  11  -1  589.20   31.22
  -2  11   1  555.40   30.83
   2 -11   0 1276.00   64.45
  -2 -11   0 1210.00   60.74
   2  11   0 1242.00   62.62
  -2  11   0 1176.00   59.81
   2 -11   1  922.20   47.66
  -2 -11  -1  946.50   48.23
   2  11   1  927.30   47.74
  -2  11  -1  933.80   48.18
   2 -11   2   47.78   11.66
   2 -11   2   21.44   10.26
  -2 -11  -2   46.07    9.53
   2  11   2   38.54    9.78
  -2  11  -2   32.13   10.27
   2 -11   3   44.94    9.26
   2 -11   3   56.16   10.39
  -2 -11  -3   57.37    9.69
   2  11   3   48.34    9.31
   2 -11   4  419.80   24.02
   2 -11   4  394.10   22.54
  -2 -11  -4  369.20   21.90
   2  11   4  408.00   23.60
   2 -11   5   80.52   10.86
   2 -11   5   84.03    9.64
  -2 -11  -5   75.22   10.53
   2  11   5   95.40   12.02
   2 -11   6   69.92   10.33
   2 -11   6   79.30    9.51
  -2 -11  -6   81.58   11.57
   2  11   6   79.07   12.26
  -2  11  -6   75.66   10.17
   2 -11   7  242.00   15.90
   2 -11   7  266.40   16.81
  -2 -11  -7  261.20   18.03
   2  11   7  236.40   17.01
  -2  11  -7  258.30   16.76
   2 -11   8   64.95    9.35
   2 -11   8   56.42    8.83
  -2 -11  -8   60.77   11.31
   2  11   8   77.79   11.55
  -2  11  -8   57.03    9.82
   2 -11   9   99.31   10.14
   2 -11   9  115.40   11.05
  -2 -11  -9   91.71   12.17
   2  11   9  105.70   11.90
  -2  11  -9   95.00   10.44
   2 -11  10   -8.97    8.07
  -2 -11 -10    8.27    9.91
   2  11  10  -15.34   10.40
  -2  11 -10    5.59    8.37
   2 -11  11    2.89    7.59
  -2 -11 -11   -7.67    9.85
   2  11  11   -5.49    9.94
  -2  11 -11   10.43    8.02
   2 -11  12   46.78    8.15
   2 -11  12   50.05    7.54
  -2 -11 -12   35.70   10.15
   2  11  12   57.12   10.80
  -2  11 -12   55.21    8.06
   2 -11  13    9.93    4.80
   2 -11  13   12.81    6.74
  -2 -11 -13    6.04    9.08
   2  11  13   10.09    8.76
  -2  11 -13    6.47    6.50
   2 -12 -14   16.35    8.28
  -2 -12  14   21.86    7.23
   2  12 -14    2.90    5.27
  -2  12  14   26.36    7.66
   2 -12 -13   13.52   10.05
  -2 -12  13    1.31    7.36
   2  12 -13    5.85    7.15
  -2  12  13    4.38    7.98
   2 -12 -12  -25.33   10.12
  -2 -12  12    3.47    8.00
   2  12 -12    4.91    7.47
  -2  12  12   -2.04    9.37
   2 -12 -11   13.17   10.86
  -2 -12  11   15.54    7.74
   2  12 -11   17.02    7.93
  -2  12  11   17.10    9.23
   2 -12 -10   14.46   10.71
  -2 -12  10   12.46    8.24
   2  12 -10    8.87    8.27
  -2  12  10    1.28    9.40
   2 -12  -9   31.36   11.28
  -2 -12   9   39.05    8.55
   2  12  -9   59.50    9.85
  -2  12   9   32.16   10.25
   2 -12  -8  325.40   20.65
  -2 -12   8  348.00   20.47
   2  12  -8  369.20   21.91
  -2  12   8  334.30   21.50
   2 -12  -7    1.62   10.78
  -2 -12   7   20.65    9.72
   2  12  -7   11.26    9.80
  -2  12   7   13.64   11.80
   2 -12  -6   45.10   11.28
  -2 -12   6   34.21    9.47
  -2 -12   6   25.69    8.57
   2  12  -6   44.70   10.14
  -2  12   6   41.72   11.50
   2 -12  -5   36.42   10.93
  -2 -12   5   60.54   10.59
  -2 -12   5   44.82    8.66
   2  12  -5   42.89    9.72
  -2  12   5   46.56   11.09
   2 -12  -4   71.89   11.43
  -2 -12   4   81.24   10.19
  -2 -12   4   75.69    9.41
  -2  12   4   68.46   11.68
   2 -12  -3  523.30   28.51
  -2 -12   3  560.00   30.24
  -2 -12   3  582.10   31.12
  -2  12   3  577.60   32.34
   2 -12  -2 2399.00  118.70
  -2 -12   2 2522.00  124.60
  -2 -12   2 2421.00  119.70
  -2  12   2 2407.00  119.70
   2 -12  -1   28.95    9.61
  -2 -12   1   17.36   10.02
   2  12  -1   21.73    9.34
  -2  12   1   20.29   12.13
   2 -12   0  470.20   26.87
  -2 -12   0  462.20   25.64
   2  12   0  438.50   24.88
  -2  12   0  435.40   25.67
   2 -12   1 1038.00   53.14
  -2 -12  -1 1060.00   53.70
   2  12   1 1102.00   56.11
  -2  12  -1 1048.00   53.92
   2 -12   2   49.77   10.27
   2 -12   2   55.52   11.40
  -2 -12  -2   44.31    9.16
   2  12   2   54.63    9.63
  -2  12  -2   67.33   10.89
   2 -12   3  312.60   19.34
   2 -12   3  337.40   20.63
  -2 -12  -3  320.50   19.10
   2  12   3  326.20   19.23
   2 -12   4    2.96    9.78
   2 -12   4   -2.48    9.98
  -2 -12  -4   -0.38    9.21
   2  12   4   -4.80    9.25
   2 -12   5  138.80   12.89
   2 -12   5  125.60   11.03
  -2 -12  -5  140.10   12.86
   2  12   5  137.60   12.77
   2 -12   6  377.00   22.23
   2 -12   6  381.70   21.84
  -2 -12  -6  378.70   22.48
   2  12   6  407.30   24.66
   2 -12   7   16.95    8.94
   2 -12   7    5.30    8.06
  -2 -12  -7   39.32   10.83
   2  12   7   27.06   11.31
  -2  12  -7   18.66    8.95
   2 -12   8   12.51    8.19
   2 -12   8   11.94    8.01
  -2 -12  -8   21.61   10.65
   2  12   8    4.85    8.08
  -2  12  -8   -4.82    8.48
   2 -12   9   24.88    8.08
   2 -12   9   27.99    8.66
  -2 -12  -9   12.41   10.72
   2  12   9   14.67    9.49
  -2  12  -9   34.31    8.72
   2 -12  10    2.71    8.61
   2 -12  10  -13.25    7.38
  -2 -12 -10   -2.01   10.63
   2  12  10   -3.47    8.20
  -2  12 -10    5.39    7.30
   2 -12  11   76.48    8.82
   2 -12  11   69.59    7.94
  -2 -12 -11   81.36   12.17
   2  12  11   68.62    9.30
  -2  12 -11   83.43    9.41
   2 -12  12   33.33    6.95
   2 -12  12   34.20    7.46
  -2 -12 -12   35.38    9.65
   2  12  12   49.14    9.36
  -2  12 -12   42.99    7.57
   2 -12  13    0.74    6.20
   2 -12  13   -0.10    5.23
  -2 -12 -13    7.71    8.60
   2  12  13    1.11    6.96
  -2  12 -13    3.62    5.95
   2 -13 -14    1.65    8.73
  -2 -13  14   -2.82    5.96
   2  13 -14   -5.41    5.07
  -2  13  14    7.84    6.59
   2 -13 -13   40.39   10.32
  -2 -13  13   54.41    7.92
   2  13 -13   52.60    7.84
  -2  13  13   51.13    9.31
   2 -13 -12   55.30   10.89
  -2 -13  12   57.66    7.91
   2  13 -12   57.80    8.50
  -2  13  12   51.36   10.56
   2 -13 -11    4.89   10.85
  -2 -13  11   -2.22    7.72
   2  13 -11    3.70    7.51
  -2  13  11   -1.84    9.59
   2 -13 -10   -1.29   10.75
  -2 -13  10    2.88    8.31
   2  13 -10   16.20    7.51
  -2  13  10   10.15   10.11
   2 -13  -9   23.46   10.11
  -2 -13   9   -4.95    8.08
   2  13  -9    7.61    9.04
  -2  13   9    5.62   11.40
   2 -13  -8   16.23   10.55
  -2 -13   8    3.28    7.53
   2  13  -8   -2.91    8.31
  -2  13   8   -2.36   11.49
   2 -13  -7 1239.00   63.13
  -2 -13   7 1261.00   63.92
  -2 -13   7 1146.00   57.86
   2  13  -7 1217.00   61.64
  -2  13   7 1209.00   61.99
   2 -13  -6   45.55   12.11
  -2 -13   6   40.90    9.21
  -2 -13   6   69.88   10.28
   2  13  -6   60.21   10.14
  -2  13   6   58.73   11.91
   2 -13  -5  178.90   14.97
  -2 -13   5  170.90   13.15
  -2 -13   5  210.00   15.00
  -2  13   5  185.60   14.43
   2 -13  -4   15.99   11.73
  -2 -13   4   26.19    9.60
  -2 -13   4   15.80    9.80
  -2  13   4   22.30   11.58
   2 -13  -3   58.37   10.14
  -2 -13   3   57.01    9.53
  -2 -13   3   51.60   10.01
  -2  13   3   50.90    9.92
   2 -13  -2   -3.04   10.36
  -2 -13   2   -1.90    9.08
  -2 -13   2   -2.77    9.91
  -2  13   2   -2.37   11.39
   2 -13  -1 1509.00   75.62
  -2 -13   1 1530.00   76.51
   2  13  -1 1493.00   74.72
  -2  13   1 1635.00   82.29
   2 -13   0   -4.85   10.46
  -2 -13   0   -4.90    8.84
   2  13   0   -5.72    9.28
  -2  13   0   13.83   11.34
   2 -13   1  201.20   14.95
  -2 -13  -1  192.70   14.93
   2  13   1  195.90   14.66
  -2  13  -1  197.40   15.40
   2 -13   2  165.90   14.43
   2 -13   2  164.00   13.88
  -2 -13  -2  156.00   12.45
   2  13   2  148.10   12.72
  -2  13  -2  146.70   12.97
   2 -13   3   12.05   10.19
   2 -13   3    2.67    9.65
  -2 -13  -3    6.87    8.78
   2  13   3    5.12   10.03
   2 -13   4  451.20   25.69
   2 -13   4  472.80   26.70
  -2 -13  -4  491.90   27.43
   2  13   4  462.40   26.00
   2 -13   5   28.44    9.96
   2 -13   5   -0.53    8.29
  -2 -13  -5   -2.99    9.57
   2  13   5   20.15   10.34
   2 -13   6   11.28    7.60
   2 -13   6   11.63    8.29
  -2 -13  -6   24.73    9.90
   2  13   6   26.01   11.25
   2 -13   7  469.40   26.04
   2 -13   7  493.20   27.10
  -2 -13  -7  514.50   29.11
   2  13   7  509.20   29.07
   2 -13   8   75.13    9.76
   2 -13   8   92.97    9.58
  -2 -13  -8   96.14   13.03
   2  13   8   80.67   11.01
  -2  13  -8   82.96   10.01
   2 -13   9    6.34    7.46
   2 -13   9    5.79    7.64
  -2 -13  -9  -12.41   10.26
   2  13   9    9.37   11.05
  -2  13  -9   13.36    8.47
   2 -13  10   15.35    8.71
   2 -13  10    6.80    7.04
  -2 -13 -10   23.54    9.98
   2  13  10  -11.16    8.71
  -2  13 -10    3.27    7.68
   2 -13  11    8.61    7.38
   2 -13  11   11.81    6.66
  -2 -13 -11   -0.53   10.68
   2  13  11   -2.01    9.60
  -2  13 -11   -5.93    7.21
   2 -13  12   12.95    6.76
   2 -13  12    3.32    6.46
  -2 -13 -12   11.33    9.91
   2  13  12    8.06    8.99
  -2  13 -12   10.38    6.54
   2 -14 -13    9.24    9.63
  -2 -14  13   -4.48    6.95
   2  14 -13    1.30    6.85
  -2  14  13    4.84    9.35
   2 -14 -12   -1.61   10.25
  -2 -14  12    1.88    6.91
   2  14 -12    4.33    6.75
  -2  14  12  -15.75   10.24
   2 -14 -11    5.14   10.65
  -2 -14  11   34.72    8.21
   2  14 -11    7.46    7.27
  -2  14  11   13.16    9.52
   2 -14 -10   13.32   10.50
  -2 -14  10   10.58    8.49
   2  14 -10    6.78    8.14
  -2  14  10   -6.96    9.88
   2 -14  -9   90.67   11.46
  -2 -14   9   88.84   10.09
  -2 -14   9   79.36    9.43
   2  14  -9   78.41    9.74
  -2  14   9   78.32   11.31
   2 -14  -8  215.60   16.08
  -2 -14   8  207.50   14.34
  -2 -14   8  251.00   16.12
   2  14  -8  219.70   15.17
  -2  14   8  220.10   16.34
   2 -14  -7   76.92   11.65
  -2 -14   7   58.38    9.10
  -2 -14   7   73.85   10.43
   2  14  -7   58.25    9.97
  -2  14   7   61.36   12.66
   2 -14  -6    8.48   10.36
  -2 -14   6   19.58    9.31
  -2 -14   6   26.54    8.58
   2  14  -6   15.51    9.85
  -2  14   6   12.07   11.54
   2 -14  -5   40.05   10.70
  -2 -14   5   74.16   10.70
  -2 -14   5   45.98    8.95
  -2  14   5   69.06   12.22
   2 -14  -4   -2.45   11.28
  -2 -14   4   17.48    9.53
  -2 -14   4   33.05    9.64
  -2  14   4    1.77    9.27
   2 -14  -3    9.23    9.78
  -2 -14   3   -3.32   10.02
  -2 -14   3   -1.46    8.44
  -2  14   3   -6.23   10.67
   2 -14  -2 1381.00   69.76
  -2 -14   2 1477.00   73.94
  -2 -14   2 1413.00   71.10
  -2  14   2 1395.00   70.53
   2 -14  -1   51.97   11.35
  -2 -14   1   66.69   10.39
   2  14  -1   63.12   10.30
  -2  14   1   40.02   11.49
   2 -14   0 1045.00   53.26
  -2 -14   0 1107.00   56.44
   2  14   0 1131.00   57.27
  -2  14   0 1060.00   54.31
   2 -14   1   21.30    9.67
  -2 -14  -1   21.10   10.56
   2  14   1   19.49    9.79
  -2  14  -1   18.61   10.35
   2 -14   2   18.36   11.50
   2 -14   2   23.38   10.33
  -2 -14  -2   15.47    8.85
   2  14   2   22.26    9.23
  -2  14  -2   24.71   10.23
   2 -14   3   27.04   10.82
   2 -14   3   24.95   10.10
  -2 -14  -3   25.01    9.33
   2  14   3   26.99    9.65
   2 -14   4    3.87    9.31
   2 -14   4    5.19    9.46
  -2 -14  -4    0.91    9.50
   2  14   4  -17.05    9.79
   2 -14   5  279.10   17.67
   2 -14   5  273.50   18.05
  -2 -14  -5  273.60   18.50
   2  14   5  262.30   18.95
   2 -14   6  560.60   30.12
   2 -14   6  586.00   31.49
  -2 -14  -6  586.50   32.09
   2  14   6  564.60   31.74
   2 -14   7  128.60   11.01
   2 -14   7  148.20   12.15
  -2 -14  -7  136.70   12.92
   2  14   7  144.20   13.43
   2 -14   8    0.43    7.54
   2 -14   8   10.40    8.15
  -2 -14  -8    0.75   11.44
   2  14   8    1.52    9.72
   2 -14   9   17.34    7.76
   2 -14   9   22.44    7.24
  -2 -14  -9    2.03   11.03
   2  14   9   18.55   10.32
   2 -14  10   19.80    7.41
   2 -14  10   -6.59    7.31
  -2 -14 -10   -4.03   10.90
   2  14  10   -9.72    9.28
  -2  14 -10    2.67    7.11
   2 -14  11    2.95    7.62
   2 -14  11    2.07    6.52
  -2 -14 -11  -11.45   10.04
   2  14  11   -0.80   10.93
  -2  14 -11   14.66    7.13
   2 -14  12   26.92    6.51
   2 -14  12   26.46    6.66
  -2 -14 -12   13.40    9.41
   2  14  12   32.73   10.95
  -2  14 -12   38.72    7.05
   2 -15 -13   36.99    9.44
  -2 -15  13   44.01    7.65
  -2 -15  13   51.58    6.83
   2  15 -13   46.88    7.21
  -2  15  13   31.42    9.68
   2 -15 -12    6.90   10.47
  -2 -15  12   -1.81    7.15
  -2 -15  12   13.30    6.25
   2  15 -12    2.77    6.66
  -2  15  12   -3.17    9.71
   2 -15 -11    0.38   10.55
  -2 -15  11   11.22    6.95
  -2 -15  11    6.24    7.16
   2  15 -11   13.75    7.49
  -2  15  11    1.72   10.23
   2 -15 -10    0.30   10.35
  -2 -15  10    8.70    7.69
  -2 -15  10   18.88    7.58
   2  15 -10   14.16    7.91
  -2  15  10    5.93   10.98
   2 -15  -9   37.81   10.63
  -2 -15   9   66.78    8.98
  -2 -15   9   66.59    8.82
   2  15  -9   73.72    9.36
  -2  15   9   45.09   11.74
   2 -15  -8   41.38   10.30
  -2 -15   8   46.62    9.26
  -2 -15   8   38.10    8.61
   2  15  -8   53.68    9.03
  -2  15   8   45.50   11.81
   2 -15  -7  223.90   16.49
  -2 -15   7  256.00   16.86
  -2 -15   7  263.10   16.61
   2 -15  -6   73.31   11.57
  -2 -15   6   71.52    9.53
  -2 -15   6   78.53   11.00
  -2  15   6   95.54   12.88
   2 -15  -5   89.62   11.15
  -2 -15   5  108.20   10.95
  -2 -15   5  137.50   12.47
  -2  15   5  102.90   14.13
   2 -15  -4  -12.08   10.89
  -2 -15   4    6.16    9.26
  -2 -15   4    1.85    8.75
  -2  15   4    5.91   11.22
   2 -15  -3   14.83    8.62
  -2 -15   3   26.63   10.40
  -2 -15   3   30.20    8.84
  -2  15   3   22.98   11.55
   2 -15  -2   47.00   11.89
  -2 -15   2   55.17   11.63
  -2 -15   2   76.93   10.55
  -2  15   2   66.58   12.52
   2 -15  -1 1629.00   81.66
  -2 -15   1 1662.00   83.03
   2  15  -1 1724.00   86.29
  -2  15   1 1608.00   80.84
   2 -15   0  218.60   15.12
  -2 -15   0  233.60   16.10
   2  15   0  239.20   16.31
  -2  15   0  201.50   15.99
   2 -15   1  407.80   24.01
  -2 -15  -1  382.60   22.82
   2  15   1  406.40   23.70
  -2  15  -1  394.70   23.63
   2 -15   2    8.02   10.32
   2 -15   2   33.28   10.99
  -2 -15  -2   23.73    9.16
   2  15   2   23.99   11.18
  -2  15  -2   14.14   10.52
   2 -15   3  346.20   21.06
   2 -15   3  317.80   19.98
  -2 -15  -3  356.80   21.71
   2  15   3  323.50   19.65
   2 -15   4  123.10   12.43
   2 -15   4  117.90   13.17
  -2 -15  -4  111.50   12.03
   2  15   4  143.40   13.44
   2 -15   5  218.10   14.97
   2 -15   5  208.40   14.93
  -2 -15  -5  219.10   16.44
   2  15   5  235.70   17.77
   2 -15   6    1.00    8.68
   2 -15   6  -10.84    7.59
  -2 -15  -6    9.17   10.12
   2  15   6    5.36    9.75
   2 -15   7  153.80   12.00
   2 -15   7  160.50   12.61
  -2 -15  -7  119.60   13.47
   2  15   7  151.90   13.79
   2 -15   8    1.76    7.90
   2 -15   8   19.12    7.94
  -2 -15  -8    5.56   10.75
   2  15   8  -22.73   10.09
   2 -15   9   37.28    7.97
   2 -15   9   28.20    7.82
  -2 -15  -9   30.24   10.71
   2  15   9   28.39   10.84
   2 -15  10   -3.91    7.09
   2 -15  10   -5.07    7.20
  -2 -15 -10    7.21   10.43
   2  15  10   -7.03    9.46
   2 -15  11    4.48    7.72
   2 -15  11   10.49    6.60
  -2 -15 -11    5.22   10.79
   2  15  11   14.22   10.09
   2 -15  12    4.18    6.30
   2 -15  12   -7.12    5.66
  -2 -15 -12    0.67    8.57
   2  15  12   -2.95    9.46
   2 -16 -13  -13.24    8.82
  -2 -16  13    8.01    5.93
  -2 -16  13    9.83    5.81
   2  16 -13    0.21    5.90
  -2  16  13  -15.98    8.99
   2 -16 -12   -2.93   10.25
  -2 -16  12   17.97    6.60
  -2 -16  12   10.66    7.14
   2  16 -12    7.41    6.39
  -2  16  12   12.73   10.35
   2 -16 -11   20.40   10.63
  -2 -16  11    7.46    6.86
  -2 -16  11   -1.04    6.97
   2  16 -11    4.91    7.58
  -2  16  11   -1.44   10.64
   2 -16 -10   26.17   10.97
  -2 -16  10   48.75    8.34
  -2 -16  10   56.08    7.93
   2  16 -10   50.93    8.17
  -2  16  10   59.77   11.83
   2 -16  -9   29.62   10.44
  -2 -16   9   12.29    7.55
  -2 -16   9   19.03    7.71
   2  16  -9    3.22    7.81
  -2  16   9    0.92   12.17
   2 -16  -8   90.37   12.15
  -2 -16   8  140.50   12.45
  -2 -16   8  114.90   10.35
  -2  16   8  107.40   13.48
   2 -16  -7   13.26   10.45
  -2 -16   7   17.90    8.41
  -2 -16   7    2.43    8.11
  -2  16   7    4.71   10.80
   2 -16  -6    6.34   10.12
  -2 -16   6   24.74    8.68
  -2 -16   6   23.72    7.93
  -2  16   6   17.57   11.31
   2 -16  -5  126.70   11.73
  -2 -16   5  128.70   11.49
  -2 -16   5  116.00   11.48
  -2  16   5  114.40   13.68
   2 -16  -4    1.30   12.26
  -2 -16   4    2.38    9.18
  -2 -16   4    3.10   10.42
  -2  16   4   -4.34    9.69
   2 -16  -3   34.11   10.74
  -2 -16   3   32.88    8.84
  -2 -16   3   35.33   10.32
  -2  16   3   12.09   10.99
   2 -16  -2  590.50   32.55
  -2 -16   2  614.10   32.68
  -2 -16   2  623.80   33.79
   2 -16  -1   -3.83   10.03
  -2 -16   1    5.15    9.58
   2  16  -1   -4.09    8.99
  -2  16   1  -23.18   11.48
   2 -16   0 1634.00   81.82
  -2 -16   0 1646.00   82.32
   2  16   0 1646.00   82.08
  -2  16   0 1549.00   77.90
   2 -16   1   10.02    9.75
  -2 -16  -1   25.47   10.74
   2 -16   2  278.70   18.53
   2 -16   2  238.30   16.59
  -2 -16  -2  241.50   16.25
   2  16   2  275.80   18.38
  -2  16  -2  220.10   16.27
   2 -16   3  129.30   12.86
   2 -16   3  115.10   12.34
  -2 -16  -3  124.20   12.51
   2  16   3  126.80   13.46
   2 -16   4  119.50   12.83
   2 -16   4  110.50   11.61
  -2 -16  -4  127.90   12.55
   2  16   4  109.30   12.93
   2 -16   5   56.89    9.93
   2 -16   5   59.49    9.71
  -2 -16  -5   47.79   11.36
   2  16   5   36.23   10.87
   2 -16   6  164.00   12.72
   2 -16   6  184.20   13.12
  -2 -16  -6  183.00   14.57
   2  16   6  151.00   14.21
   2 -16   7   20.94    8.24
   2 -16   7    7.56    7.77
  -2 -16  -7   -2.14    9.85
   2  16   7    7.63    9.33
   2 -16   8   53.62    8.83
   2 -16   8   68.89    9.23
  -2 -16  -8   60.44   10.89
   2  16   8   44.03   10.99
   2 -16   9   -0.13    7.43
   2 -16   9   -5.60    7.27
  -2 -16  -9    3.69   10.06
   2  16   9   24.11    9.67
   2 -16  10   16.87    8.05
   2 -16  10    5.81    7.14
  -2 -16 -10    1.76   10.95
   2  16  10   11.21   10.07
   2 -16  11   -5.25    6.96
   2 -16  11   -6.86    7.22
  -2 -16 -11   -7.28   10.28
   2  16  11    3.95   10.14
   2 -16  12   20.88    6.96
   2 -16  12   30.93    5.72
  -2 -16 -12   -0.13    9.47
   2  16  12   23.66    9.42
   2 -17 -13    6.37    8.61
  -2 -17  13   17.02    6.27
  -2 -17  13    8.99    4.92
   2  17 -13   11.20    5.63
  -2  17  13   -5.47   10.19
   2 -17 -12   -0.86   10.02
  -2 -17  12   18.47    6.89
  -2 -17  12   -2.49    6.84
   2  17 -12   13.67    6.35
  -2  17  12    8.42    9.84
   2 -17 -11   -5.15   10.45
  -2 -17  11   12.17    7.43
  -2 -17  11    4.42    6.80
   2  17 -11    5.97    7.25
  -2  17  11   -4.31   10.35
   2 -17 -10   26.84   10.39
  -2 -17  10   48.77    7.96
  -2 -17  10   20.15    7.56
   2  17 -10   22.71    6.78
  -2  17  10   16.43   10.18
   2 -17  -9   79.49   11.44
  -2 -17   9   90.58    9.88
  -2 -17   9   83.68    9.11
  -2  17   9   65.59   11.28
   2 -17  -8   13.06   10.18
  -2 -17   8   28.20    7.89
  -2 -17   8   19.19    8.36
  -2  17   8   18.17   10.81
   2 -17  -7  389.90   23.36
  -2 -17   7  381.80   21.74
  -2 -17   7  407.90   23.08
  -2  17   7  377.70   22.35
   2 -17  -6   17.63   10.39
  -2 -17   6   42.77    9.41
  -2 -17   6   33.69    7.87
  -2  17   6   20.75   11.89
   2 -17  -5  -15.70    8.62
  -2 -17   5   -2.44    9.39
  -2 -17   5    0.49    8.53
  -2  17   5    2.82   11.37
   2 -17  -4  504.60   28.61
  -2 -17   4  463.90   26.09
  -2 -17   4  507.90   28.44
  -2  17   4  503.10   28.32
   2 -17  -3    0.65   10.15
  -2 -17   3    7.43    8.60
  -2 -17   3  -11.27   10.16
  -2  17   3   -2.70   11.01
   2 -17  -2   13.28   10.12
  -2 -17   2   30.76   10.38
  -2 -17   2   18.61    8.88
   2  17  -2   44.60   10.45
  -2  17   2   21.70   10.99
   2 -17  -1 1152.00   58.60
  -2 -17   1 1108.00   56.36
   2  17  -1 1075.00   54.81
  -2  17   1 1132.00   57.96
   2 -17   0   97.21   11.83
  -2 -17   0  113.80   11.99
   2  17   0  122.00   11.84
  -2  17   0  104.60   12.42
   2 -17   1   67.91   11.03
  -2 -17  -1   53.10   10.09
   2  17   1   33.11   10.85
  -2  17  -1   33.34   10.66
   2 -17   2   98.31   11.78
   2 -17   2   96.17   12.63
  -2 -17  -2  112.30   11.96
   2  17   2   97.81   12.59
  -2  17  -2   92.02   12.36
   2 -17   3   -1.00   10.31
   2 -17   3   22.03   11.15
  -2 -17  -3   17.61   10.30
   2  17   3    4.80   10.97
   2 -17   4   19.47    8.97
   2 -17   4   18.02    9.96
  -2 -17  -4   16.13    9.73
   2  17   4   19.96   10.65
   2 -17   5    0.54    9.09
   2 -17   5    6.23    9.43
  -2 -17  -5    3.66    9.38
   2  17   5   19.30   10.46
   2 -17   6   -1.29    7.65
   2 -17   6   21.96    9.41
  -2 -17  -6  -13.03   10.48
   2  17   6   11.02   10.12
   2 -17   7  561.10   30.18
   2 -17   7  540.30   28.89
  -2 -17  -7  581.50   31.86
   2  17   7  569.60   30.88
   2 -17   8   13.12    8.20
   2 -17   8   -0.21    8.27
  -2 -17  -8   22.57   11.49
   2  17   8    3.07    9.18
   2 -17   9    0.37    7.80
   2 -17   9   15.20    7.67
  -2 -17  -9  -17.32   10.82
   2  17   9    0.93    8.81
   2 -17  10    7.79    7.10
   2 -17  10    4.87    6.74
  -2 -17 -10   13.83   11.25
   2  17  10    0.10    9.94
   2 -17  11   -4.48    6.58
   2 -17  11    5.15    7.68
  -2 -17 -11   11.39   10.33
   2  17  11  -21.56    9.59
   2 -17  12   12.62    5.47
   2 -17  12   -0.98    6.18
  -2 -17 -12   -7.88   10.50
   2  17  12    9.90    8.95
   2 -18 -12    2.18    9.61
  -2 -18  12    6.66    6.74
  -2 -18  12   -5.17    6.56
  -2  18  12   -0.76    9.85
   2 -18 -11   16.43   10.85
  -2 -18  11   22.70    7.59
  -2 -18  11    0.40    6.51
  -2  18  11   -5.98   10.71
   2 -18 -10   29.69   10.21
  -2 -18  10   22.42    6.93
  -2 -18  10   28.15    7.67
  -2  18  10   28.17    9.19
   2 -18  -9   18.63    9.89
  -2 -18   9   37.44    8.41
  -2 -18   9   18.90    6.92
  -2  18   9   32.64   10.67
   2 -18  -8  343.20   21.18
  -2 -18   8  388.10   22.04
  -2 -18   8  378.70   21.60
  -2  18   8  371.60   22.32
   2 -18  -7   56.96   11.40
  -2 -18   7   36.70    8.19
  -2 -18   7   43.02    8.62
  -2  18   7   47.07   11.52
   2 -18  -6   76.26   10.60
  -2 -18   6   71.15   10.28
  -2 -18   6   63.07    9.07
  -2  18   6   84.76   12.49
   2 -18  -5   -5.06    9.80
  -2 -18   5    2.46    8.11
  -2 -18   5    4.07    9.75
  -2  18   5    6.94   11.45
   2 -18  -4   85.08   12.84
  -2 -18   4   81.87   11.42
  -2 -18   4   86.99   10.76
  -2  18   4   83.86   12.26
   2 -18  -3  294.80   18.80
  -2 -18   3  332.50   20.92
  -2 -18   3  323.40   19.66
  -2  18   3  333.40   21.81
   2 -18  -2  659.80   35.51
  -2 -18   2  659.10   35.18
  -2 -18   2  705.10   37.20
   2  18  -2  626.40   34.02
  -2  18   2  702.10   37.82
   2 -18  -1  131.20   12.83
  -2 -18   1  146.40   13.60
   2  18  -1  138.20   12.80
  -2  18   1  111.90   12.37
   2 -18   0  158.00   14.14
  -2 -18   0  177.90   14.88
   2  18   0  182.50   14.89
  -2  18   0  133.20   13.54
   2 -18   1    4.60   10.37
  -2 -18  -1   -4.03    9.68
   2  18   1   -2.34   10.75
  -2  18  -1    7.13   10.98
   2 -18   2  241.80   16.74
   2 -18   2  258.40   17.11
  -2 -18  -2  234.40   16.93
   2  18   2  237.00   17.23
  -2  18  -2  236.50   17.25
   2 -18   3   30.69    9.14
   2 -18   3   36.95    9.97
  -2 -18  -3   22.11   11.21
   2  18   3   27.60   11.09
   2 -18   4   72.67   10.78
   2 -18   4   80.60   10.81
  -2 -18  -4   81.55   10.30
   2  18   4   59.09   12.01
   2 -18   5   26.95    9.72
   2 -18   5   17.43    9.08
  -2 -18  -5   19.73   10.12
   2  18   5   23.01   10.83
   2 -18   6  302.40   18.87
   2 -18   6  322.50   19.43
  -2 -18  -6  360.10   22.13
   2  18   6  355.80   21.67
   2 -18   7   13.94    8.28
   2 -18   7   -3.73    7.48
  -2 -18  -7    5.55    9.69
   2  18   7   -3.73   10.85
   2 -18   8   49.11    8.35
   2 -18   8   21.64    8.99
  -2 -18  -8   40.50   10.21
   2  18   8   22.12   10.29
   2 -18   9    0.47    7.71
  -2 -18  -9    8.68   11.13
   2  18   9   -1.93    8.52
   2 -18  10    9.68    6.76
   2 -18  10   10.05    6.72
  -2 -18 -10   19.09   11.39
   2  18  10   22.25    9.34
   2 -18  11   -9.94    7.11
   2 -18  11    0.26    6.18
  -2 -18 -11  -23.62    9.68
   2  18  11    0.70    8.34
   2 -19 -12  -20.67    8.69
  -2 -19  12    0.45    5.90
  -2 -19  12    1.92    6.34
  -2  19  12    3.91    8.90
   2 -19 -11  -18.28   10.29
  -2 -19  11   -4.88    6.88
  -2 -19  11   -3.06    6.45
  -2  19  11   -3.56    8.38
   2 -19 -10   -5.59    9.94
  -2 -19  10   23.15    7.40
  -2 -19  10    1.79    7.18
  -2  19  10   -4.15   10.18
   2 -19  -9  109.00   12.31
  -2 -19   9   98.97    9.80
  -2 -19   9   97.68    9.78
  -2  19   9  106.40   12.20
   2 -19  -8   23.83   10.49
  -2 -19   8   34.15    8.12
  -2 -19   8   32.79    8.42
  -2  19   8   31.80   10.01
   2 -19  -7  453.20   26.29
  -2 -19   7  467.40   25.56
  -2 -19   7  445.40   24.53
  -2  19   7  464.90   26.67
   2 -19  -6  436.40   25.11
  -2 -19   6  464.00   25.62
  -2 -19   6  441.80   24.65
  -2  19   6  422.60   24.69
   2 -19  -5    2.21    8.96
  -2 -19   5   -0.88    9.04
  -2 -19   5    6.77    8.94
  -2  19   5    3.96   11.07
   2 -19  -4  246.10   17.56
  -2 -19   4  266.10   17.26
  -2 -19   4  223.90   15.46
  -2  19   4  254.50   18.23
   2 -19  -3   -5.54    8.94
  -2 -19   3    0.62    9.14
  -2 -19   3  -26.56   11.55
  -2  19   3   14.11   11.32
   2 -19  -2  201.90   15.47
  -2 -19   2  185.70   14.58
  -2 -19   2  228.70   16.14
  -2  19   2  180.40   15.48
   2 -19  -1   -8.27    8.47
  -2 -19   1   -2.69    9.91
   2  19  -1  -10.53    8.80
  -2  19   1    9.27   12.00
   2 -19   0  490.20   27.44
  -2 -19   0  452.40   25.87
   2  19   0  479.50   26.70
  -2  19   0  437.40   25.68
   2 -19   1 1029.00   52.98
  -2 -19  -1 1115.00   56.97
   2  19   1  979.00   50.47
  -2  19  -1  998.20   51.43
   2 -19   2    0.84    8.96
   2 -19   2    2.38    9.52
  -2 -19  -2    8.52    9.98
   2  19   2    0.98   10.60
  -2  19  -2    4.88   10.17
   2 -19   3   18.57    8.54
   2 -19   3   16.10   10.91
  -2 -19  -3   24.93   11.50
   2  19   3   42.27   11.43
   2 -19   4   -0.67    9.55
   2 -19   4    5.57    8.49
  -2 -19  -4   16.21    9.88
   2  19   4    4.02   10.51
   2 -19   5   13.84    8.44
   2 -19   5   16.55    9.53
  -2 -19  -5   12.20   10.32
   2  19   5   10.22    9.76
   2 -19   6   21.07    8.74
   2 -19   6   -1.89    8.22
  -2 -19  -6    1.01   10.79
   2  19   6    2.73    8.67
   2 -19   7  312.90   19.14
   2 -19   7  302.20   18.29
  -2 -19  -7  298.40   18.76
   2  19   7  293.60   18.91
   2 -19   8    8.34    7.50
   2 -19   8   32.59    9.56
  -2 -19  -8   17.07    9.77
   2  19   8    6.39    9.56
   2 -19   9   13.82    6.49
   2 -19   9    5.99    8.14
  -2 -19  -9    6.40   11.44
   2  19   9   -6.21    9.61
   2 -19  10    6.07    7.26
   2 -19  10    6.91    6.54
  -2 -19 -10   11.11   11.00
   2  19  10   14.41    9.95
   2 -19  11  -11.01    6.06
   2 -19  11    2.74    5.80
  -2 -19 -11   -9.32    8.86
   2  19  11    3.96    8.82
   2 -20 -12   -5.95    8.69
  -2 -20  12  -11.20    6.60
  -2 -20  12    4.82    5.23
  -2  20  12   -4.80   10.58
   2 -20 -11   -0.30    9.44
  -2 -20  11    0.61    6.74
  -2 -20  11    8.22    7.14
  -2  20  11   10.16    9.55
   2 -20 -10   30.98   10.68
  -2 -20  10   29.69    7.09
  -2 -20  10   38.76    7.86
  -2  20  10   31.93   10.79
   2 -20  -9    5.76    9.29
  -2 -20   9   27.24    7.85
  -2 -20   9   16.75    7.79
  -2  20   9   19.62   10.45
   2 -20  -8  256.60   17.53
  -2 -20   8  235.20   15.10
  -2 -20   8  266.50   16.90
  -2  20   8  255.40   17.81
   2 -20  -7   15.90   10.37
  -2 -20   7   17.64    8.02
  -2 -20   7    8.07    7.29
  -2  20   7    5.57    9.55
   2 -20  -6   57.77   11.23
  -2 -20   6   58.24    9.05
  -2 -20   6   44.73    9.17
  -2  20   6   51.51   10.62
   2 -20  -5  384.90   22.65
  -2 -20   5  423.40   23.84
  -2 -20   5  403.10   23.05
  -2  20   5  433.60   25.45
   2 -20  -4   20.12   11.06
  -2 -20   4   18.28    9.60
  -2 -20   4    6.17    8.84
  -2  20   4   18.57   11.43
   2 -20  -3  166.60   13.68
  -2 -20   3  180.30   13.58
  -2 -20   3  164.80   14.35
  -2  20   3  176.80   16.50
   2 -20  -2    3.27   10.54
  -2 -20   2   -8.07    9.38
  -2 -20   2    4.17    9.23
  -2  20   2    2.82   11.18
   2 -20  -1  209.70   15.65
  -2 -20   1  175.50   13.98
  -2 -20   1  167.20   13.57
   2  20  -1  205.70   15.16
  -2  20   1  189.00   15.26
   2 -20   0  469.20   26.47
  -2 -20   0  481.50   26.76
   2  20   0  522.20   29.21
  -2  20   0  557.50   31.16
   2 -20   1  373.50   22.25
  -2 -20  -1  386.00   23.27
   2  20   1  384.80   23.12
  -2  20  -1  357.00   21.94
   2 -20   2   53.92    9.92
   2 -20   2   76.58   10.90
  -2 -20  -2   84.93   11.84
   2  20   2   73.52   12.80
  -2  20  -2   74.73   11.09
   2 -20   3    1.74    8.23
   2 -20   3  -10.57    9.46
  -2 -20  -3   -4.81   10.97
   2  20   3   -3.91   11.81
   2 -20   4  -13.03    9.27
   2 -20   4    9.71    8.74
  -2 -20  -4    4.77   10.01
   2  20   4    6.15   10.53
   2 -20   5   46.96    9.39
   2 -20   5   53.76    9.45
  -2 -20  -5   34.83   10.94
   2  20   5   38.51   10.17
   2 -20   6  193.10   13.59
   2 -20   6  209.00   14.32
  -2 -20  -6  201.40   15.63
   2  20   6  178.50   14.92
   2 -20   7   -4.35    7.83
   2 -20   7   11.89    8.03
  -2 -20  -7   -1.69   10.37
   2  20   7   11.09   10.10
   2 -20   8   -3.23    7.55
   2 -20   8   -1.25    7.99
  -2 -20  -8    1.74    9.42
   2  20   8   -6.74    8.96
   2 -20   9   31.34    8.10
   2 -20   9   24.84    7.62
  -2 -20  -9   31.99   11.94
   2  20   9   37.26    9.85
   2 -20  10    9.32    6.68
   2 -20  10    9.67    6.59
  -2 -20 -10    8.03   10.92
   2  20  10   16.64    9.78
   2 -20  11    2.60    6.73
   2 -20  11    7.04    5.55
  -2 -20 -11   17.28    8.84
   2  20  11  -11.45   11.33
  -2 -21  12   13.60    7.03
  -2  21  12   17.93   11.78
   2 -21 -11   -5.49    9.33
  -2 -21  11   -0.57    6.15
  -2 -21  11    4.53    6.32
  -2  21  11   -9.79    9.26
   2 -21 -10   82.54   11.46
  -2 -21  10   83.20    8.46
  -2 -21  10   90.89    9.07
  -2  21  10   88.65   11.51
   2 -21  -9   49.43   10.59
  -2 -21   9   61.24    8.91
  -2 -21   9   68.71    8.53
  -2  21   9   62.83   11.41
   2 -21  -8    4.78   11.13
  -2 -21   8    8.41    8.23
  -2 -21   8   -6.05    7.25
  -2  21   8    8.45   10.56
   2 -21  -7  156.90   13.20
  -2 -21   7  150.00   12.24
  -2 -21   7  150.80   12.08
  -2  21   7  137.70   11.92
   2 -21  -6   41.08   10.28
  -2 -21   6   51.01    8.64
  -2 -21   6   45.26    8.98
  -2  21   6   38.99    9.31
   2 -21  -5  149.50   13.13
  -2 -21   5  161.00   13.06
  -2 -21   5  151.20   12.20
  -2  21   5  153.70   13.91
   2 -21  -4  153.90   14.31
  -2 -21   4  156.90   12.85
  -2 -21   4  153.60   13.53
  -2  21   4  127.20   14.10
   2 -21  -3   16.42    9.95
  -2 -21   3    4.53    8.69
  -2 -21   3   11.17    9.48
  -2  21   3    4.60   11.66
   2 -21  -2  907.40   47.15
  -2 -21   2  942.40   48.71
  -2 -21   2  923.90   47.69
  -2  21   2  904.30   47.26
   2 -21  -1  198.30   15.07
  -2 -21   1  202.60   15.60
  -2 -21   1  189.80   14.09
   2  21  -1  161.30   13.55
  -2  21   1  176.60   14.64
   2 -21   0  170.30   13.93
  -2 -21   0  172.10   13.95
   2  21   0  178.60   15.29
  -2  21   0  163.20   14.11
   2 -21   1  169.70   13.97
  -2 -21  -1  159.80   14.62
   2  21   1  162.00   14.05
  -2  21  -1  143.00   12.70
   2 -21   2  139.50   12.86
   2 -21   2  139.40   12.68
  -2 -21  -2  149.40   12.91
   2  21   2  170.30   14.42
  -2  21  -2  122.80   12.97
   2 -21   3    7.66    8.63
   2 -21   3   25.55    9.39
  -2 -21  -3   15.40   11.04
   2  21   3   20.64   11.29
   2 -21   4  135.90   11.54
   2 -21   4  152.30   12.56
  -2 -21  -4  160.00   13.66
   2  21   4  158.60   13.80
   2 -21   5    8.30    8.12
   2 -21   5   15.72    8.60
  -2 -21  -5   12.78    9.84
   2  21   5   26.42    9.58
   2 -21   6   13.79    7.66
   2 -21   6    8.91    8.19
  -2 -21  -6    2.18   10.41
   2  21   6   18.91    9.98
   2 -21   7   82.83    9.31
   2 -21   7   68.46    8.66
  -2 -21  -7   75.18   10.85
   2  21   7   81.98   10.78
   2 -21   8   12.25    7.44
   2 -21   8   23.26    7.95
  -2 -21  -8   -4.76   10.61
   2  21   8    8.73    8.83
   2 -21   9   32.86    8.23
   2 -21   9   47.34    7.94
  -2 -21  -9   65.12   11.39
   2  21   9   29.98    9.86
   2 -21  10   -1.64    6.30
   2 -21  10   -0.87    5.59
  -2 -21 -10    1.98   10.03
   2  21  10   -0.43    8.97
   2 -22 -11    1.58    8.21
  -2 -22  11   12.21    5.85
  -2 -22  11   -5.15    6.10
  -2  22  11    6.61    9.12
   2 -22 -10   22.64    9.74
  -2 -22  10   33.14    6.73
  -2 -22  10   47.21    8.18
  -2  22  10   27.51    9.83
   2 -22  -9   72.15   11.49
  -2 -22   9   98.94    9.30
  -2 -22   9   79.57    8.96
  -2  22   9  104.40   11.93
   2 -22  -8   48.83   11.04
  -2 -22   8   50.44    8.26
  -2 -22   8   38.38    8.48
  -2  22   8   60.85   10.96
   2 -22  -7   25.42   11.09
  -2 -22   7    6.96    8.16
  -2 -22   7   16.68    7.46
  -2  22   7   27.48    9.48
   2 -22  -6   91.81   10.99
  -2 -22   6   87.45    9.97
  -2 -22   6   71.67    8.82
  -2  22   6  107.90   11.78
   2 -22  -5  155.60   13.32
  -2 -22   5  172.30   13.46
  -2 -22   5  175.60   13.25
  -2  22   5  174.80   14.44
   2 -22  -4    7.27   10.50
  -2 -22   4   14.59    9.82
  -2 -22   4    8.53    9.24
  -2  22   4    1.36   10.71
   2 -22  -3   -7.33    9.64
  -2 -22   3    4.09    9.76
  -2 -22   3  -10.32    8.65
  -2  22   3    5.65   11.30
   2 -22  -2  558.50   30.64
  -2 -22   2  536.30   29.31
  -2 -22   2  554.40   30.27
  -2  22   2  581.90   32.35
   2 -22  -1  351.80   20.86
  -2 -22   1  353.80   21.12
  -2 -22   1  384.20   22.56
   2  22  -1  337.70   20.80
  -2  22   1  334.30   20.62
   2 -22   0   51.29    9.73
  -2 -22   0   41.49   10.26
   2  22   0   42.77   11.16
  -2  22   0   29.98    9.81
   2 -22   1  210.10   14.51
  -2 -22  -1  214.40   16.14
   2  22   1  211.70   15.67
  -2  22  -1  238.80   16.89
   2 -22   2   -2.27    9.68
   2 -22   2   -5.22    8.69
  -2 -22  -2    2.18   10.28
   2  22   2    2.08   10.80
  -2  22  -2    0.01    9.61
   2 -22   3    7.42    8.79
   2 -22   3    3.12    8.46
  -2 -22  -3    5.62   10.62
   2  22   3    1.02    9.85
   2 -22   4  134.80   11.60
   2 -22   4  159.60   12.72
  -2 -22  -4  171.70   13.46
   2  22   4  179.70   14.39
   2 -22   5  147.10   11.80
   2 -22   5  154.60   12.45
  -2 -22  -5  124.50   12.52
   2  22   5  135.70   13.23
   2 -22   6   25.86    8.45
   2 -22   6    8.30    7.53
  -2 -22  -6   -3.84   10.13
   2  22   6   -2.99    9.86
   2 -22   7    2.25    7.99
   2 -22   7   13.22    7.71
  -2 -22  -7    5.71   10.26
   2  22   7   -5.80    8.95
   2 -22   8   58.27    9.15
   2 -22   8   44.46    7.66
  -2 -22  -8   46.63   10.64
   2  22   8   34.83   10.37
   2 -22   9   34.43    7.30
   2 -22   9   33.26    7.66
  -2 -22  -9   22.61   10.23
   2  22   9    4.31    9.35
   2 -22  10    1.76    6.56
   2 -22  10   -6.85    7.03
  -2 -22 -10   -1.94    8.53
   2  22  10    5.03   10.00
   2 -23 -11    6.20    8.14
  -2 -23  11    0.27    5.88
  -2 -23  11    9.07    6.71
  -2  23  11   19.00   11.91
   2 -23 -10    1.25    8.50
  -2 -23  10   16.46    7.57
  -2 -23  10   10.94    6.28
  -2  23  10   -2.25    8.45
   2 -23  -9   16.15   10.49
  -2 -23   9    9.86    7.58
  -2 -23   9   35.46    7.48
  -2  23   9   21.40    9.94
   2 -23  -8   43.67   10.16
  -2 -23   8   47.59    8.35
  -2 -23   8   31.84    7.82
  -2  23   8   52.76   11.02
   2 -23  -7   70.50   11.67
  -2 -23   7   60.86    8.45
  -2 -23   7   81.09   10.12
  -2  23   7   66.77   10.46
   2 -23  -6  244.80   16.76
  -2 -23   6  292.20   17.89
  -2 -23   6  303.30   17.87
  -2  23   6  284.30   18.69
   2 -23  -5   67.17    9.97
  -2 -23   5   77.85   10.27
  -2 -23   5   68.66    9.77
  -2  23   5   66.59   11.03
   2 -23  -4   24.31   10.78
  -2 -23   4   22.34    9.33
  -2 -23   4   27.82    9.48
  -2  23   4   26.26   11.05
   2 -23  -3    1.42    9.02
  -2 -23   3    2.60    8.14
  -2 -23   3    5.01    8.87
  -2  23   3    9.16    9.71
   2 -23  -2   53.78   10.53
  -2 -23   2   31.67   10.08
  -2 -23   2   54.73    9.63
  -2  23   2   44.30   11.53
   2 -23  -1  198.60   15.06
  -2 -23   1  206.90   15.29
  -2 -23   1  213.50   14.95
   2  23  -1  214.80   15.85
  -2  23   1  194.90   14.71
   2 -23   0    9.87    8.91
  -2 -23   0  -10.03    9.81
   2  23   0    2.16   10.54
  -2  23   0    6.02    8.78
   2 -23   1    4.63    9.03
   2 -23   1    0.45    8.97
  -2 -23  -1   20.46   11.31
   2  23   1    2.26    9.87
  -2  23  -1   14.28    9.52
   2 -23   2   45.30    9.88
   2 -23   2   50.33    9.33
  -2 -23  -2   49.39   10.72
   2  23   2   48.18   10.55
  -2  23  -2   56.69    9.25
   2 -23   3  148.90   11.89
   2 -23   3  147.00   12.82
  -2 -23  -3  144.20   13.71
   2  23   3  147.00   12.50
   2 -23   4   38.77    9.21
   2 -23   4   45.31    8.94
  -2 -23  -4   49.07    9.42
   2  23   4   35.55   11.07
   2 -23   5   -1.04    9.58
   2 -23   5    1.91    9.09
  -2 -23  -5    4.26    9.44
   2  23   5   12.07   10.36
   2 -23   6   12.62    8.17
   2 -23   6   22.35    8.51
   2  23   6   11.50    9.40
   2 -23   7  139.50   11.02
   2 -23   7  115.10   10.64
  -2 -23  -7  116.30   13.28
   2  23   7  101.40   11.98
   2 -23   8   38.60    7.28
   2 -23   8   59.22    8.20
  -2 -23  -8   44.50   11.08
   2  23   8   30.89    9.26
   2 -23   9   -1.83    7.01
   2 -23   9    6.35    7.29
  -2 -23  -9   -8.40    9.60
   2  23   9  -17.54    8.80
   2 -23  10   -3.48    5.54
   2 -23  10   -2.04    6.26
   2  23  10   -8.65   10.81
   2 -24 -10   21.45    8.40
  -2 -24  10   38.39    6.52
  -2 -24  10   31.99    7.92
  -2  24  10   19.51    8.21
   2 -24  -9   58.40   11.07
  -2 -24   9   48.70    7.84
  -2 -24   9   47.80    8.24
  -2  24   9   36.24   10.01
   2 -24  -8   56.14   11.03
  -2 -24   8   52.75    8.59
  -2 -24   8   57.83    8.62
  -2  24   8   35.84   10.59
   2 -24  -7   -3.25    9.18
  -2 -24   7   -2.79    7.48
  -2 -24   7    0.62    8.15
  -2  24   7   -5.86   10.40
   2 -24  -6    1.16   10.07
  -2 -24   6   -3.64    8.53
  -2 -24   6   -5.39    7.38
  -2  24   6    9.58   10.43
   2 -24  -5  200.00   14.47
  -2 -24   5  222.90   15.38
  -2 -24   5  224.20   15.09
  -2  24   5  220.20   16.25
   2 -24  -4   73.44   11.76
  -2 -24   4   43.46    9.47
  -2 -24   4   59.33    9.86
  -2  24   4   63.86   11.14
   2 -24  -3   33.84    9.06
  -2 -24   3   32.70    8.82
  -2 -24   3   39.84    9.36
  -2  24   3   32.87   11.20
   2 -24  -2  139.40   13.15
  -2 -24   2  129.10   12.08
  -2 -24   2  138.10   11.87
  -2  24   2  156.00   13.82
   2 -24  -1   24.38   10.65
  -2 -24   1   14.04    9.20
  -2 -24   1   18.68    8.78
   2  24  -1   19.17    9.40
  -2  24   1    9.60    8.76
   2 -24   0   30.69    9.13
  -2 -24   0   41.63   10.22
   2  24   0   40.30   10.36
  -2  24   0   47.17   10.10
   2 -24   1  -11.54    8.84
   2 -24   1    6.34    9.34
  -2 -24  -1    5.23   10.41
   2  24   1   -4.96    9.77
  -2  24  -1  -30.30    9.16
   2 -24   2   35.40    9.67
   2 -24   2   25.74    9.09
  -2 -24  -2   14.49    8.71
   2  24   2   13.52    9.02
  -2  24  -2    2.17    8.33
   2 -24   3   56.48   10.22
   2 -24   3   80.25    9.89
  -2 -24  -3   71.78   11.79
   2  24   3   63.68   10.83
   2 -24   4   24.80    8.92
   2 -24   4   28.28    9.38
  -2 -24  -4   23.79    8.83
   2  24   4    7.60   10.14
   2 -24   5  176.00   13.53
   2 -24   5  168.70   13.48
  -2 -24  -5  173.90   13.97
   2  24   5  181.00   14.56
   2 -24   6   82.74    9.93
   2 -24   6   93.23   10.01
  -2 -24  -6   89.80   12.08
   2  24   6   70.92   10.98
   2 -24   7    1.54    7.66
   2 -24   7  -16.41    7.99
  -2 -24  -7    6.98   10.41
   2  24   7   -5.70    9.34
   2 -24   8    3.88    6.96
   2 -24   8    3.93    6.91
  -2 -24  -8   14.48   10.18
   2  24   8   11.09    8.70
   2 -24   9   19.31    7.21
   2 -24   9   10.41    7.09
  -2 -24  -9   13.47    8.15
   2  24   9    3.89    8.34
   2 -25 -10    7.44    7.48
  -2 -25  10    8.73    6.65
  -2 -25  10    3.75    6.00
  -2  25  10  -12.05    9.62
   2 -25  -9   22.58    9.22
  -2 -25   9   14.92    6.99
  -2 -25   9   28.90    7.72
  -2  25   9   22.31    8.73
   2 -25  -8   12.67   10.33
  -2 -25   8   11.44    7.58
  -2 -25   8    1.60    7.08
  -2  25   8   10.22    9.45
   2 -25  -7   34.78   10.93
  -2 -25   7   18.82    8.25
  -2 -25   7   11.98    7.32
  -2  25   7   32.77   10.69
   2 -25  -6    9.09    9.93
  -2 -25   6   25.73    9.04
  -2 -25   6   15.28    7.51
  -2  25   6   15.35    9.55
   2 -25  -5   17.72    8.61
  -2 -25   5   29.05    8.79
  -2 -25   5    7.64    9.80
  -2  25   5   18.33   10.24
   2 -25  -4   19.11   11.48
  -2 -25   4   24.51    8.54
  -2 -25   4   19.57    9.29
  -2  25   4   27.47   10.80
   2 -25  -3  117.10   11.68
  -2 -25   3  111.60   11.55
  -2 -25   3  106.40   10.58
  -2  25   3  113.80   12.53
   2 -25  -2   66.63   10.97
  -2 -25   2   72.36    9.86
  -2 -25   2   76.36   10.04
  -2  25   2   71.91   10.90
   2 -25  -1   -2.84    9.18
  -2 -25   1  -13.73    8.48
  -2 -25   1   10.59    8.62
   2  25  -1   -8.64    9.43
  -2  25   1   -5.45    9.26
   2 -25   0   -5.00    8.66
  -2 -25   0    2.62    9.71
   2  25   0  -12.36    9.45
  -2  25   0   17.43    9.47
   2 -25   1  237.40   15.84
   2 -25   1  239.50   16.03
  -2 -25  -1  223.70   16.14
   2  25   1  247.40   16.43
  -2  25  -1  232.20   15.29
   2 -25   2   78.66   10.26
   2 -25   2   55.76    8.65
  -2 -25  -2   54.60   10.37
   2  25   2   43.85    9.07
   2 -25   3   -6.49    9.07
   2 -25   3    6.57    7.96
  -2 -25  -3    1.68   10.99
   2  25   3   17.42   10.13
   2 -25   4   90.70   10.33
   2 -25   4   97.50   10.15
  -2 -25  -4   58.91    9.35
   2  25   4   99.49   11.53
   2 -25   5   65.41   10.11
   2 -25   5   54.84    9.09
  -2 -25  -5   57.94   10.81
   2  25   5   45.50   10.37
   2 -25   6   -3.17    7.63
   2 -25   6   16.23    8.50
  -2 -25  -6   20.71   10.81
   2  25   6  -10.32   10.76
   2 -25   7   21.79    7.03
   2 -25   7   26.95    7.60
  -2 -25  -7   40.51   10.24
   2  25   7   11.50    9.16
   2 -25   8   27.66    7.16
   2 -25   8   29.00    7.34
  -2 -25  -8   12.05    9.18
   2  25   8   39.54    9.16
   2 -25   9   11.79    6.98
   2 -25   9    7.08    6.14
  -2 -25  -9    6.37    8.51
   2  25   9    1.62    8.35
   2 -26  -9   -8.57    8.06
  -2 -26   9   18.19    6.83
  -2 -26   9   -1.75    7.01
  -2  26   9   -5.91    8.13
   2 -26  -8   22.29    9.15
  -2 -26   8    6.32    7.35
  -2 -26   8   12.50    6.44
  -2  26   8   14.12    8.70
   2 -26  -7    5.04    9.93
  -2 -26   7   13.30    8.14
  -2 -26   7    2.47    6.91
  -2  26   7   12.68    8.53
   2 -26  -6  -16.72    9.91
  -2 -26   6   -0.80    8.94
  -2 -26   6    1.65    7.26
  -2  26   6  -16.04   10.51
   2 -26  -5   27.80    9.56
  -2 -26   5   40.82    8.83
  -2 -26   5   35.44    9.11
  -2  26   5   16.50   10.49
   2 -26  -4   34.15   10.42
  -2 -26   4   31.61    8.93
  -2 -26   4   40.05    8.38
  -2  26   4   44.64   10.74
   2 -26  -3    5.29    7.82
  -2 -26   3   -1.79    7.56
  -2 -26   3   22.05    9.89
  -2  26   3   -5.68   10.34
   2 -26  -2  235.60   16.00
  -2 -26   2  207.80   14.96
  -2 -26   2  211.40   14.59
  -2  26   2  168.70   13.71
   2 -26  -1  217.50   15.84
  -2 -26   1  200.40   14.52
  -2 -26   1  216.20   14.98
   2  26  -1  199.40   14.54
  -2  26   1  214.60   15.06
   2 -26   0   19.85    8.77
  -2 -26   0   12.79   10.49
   2  26   0   18.80    8.89
  -2  26   0   46.77    9.56
   2 -26   1  224.90   15.43
   2 -26   1  198.80   14.20
  -2 -26  -1  220.20   15.75
   2  26   1  202.60   14.43
  -2  26  -1  210.70   14.56
   2 -26   2   28.70    8.59
   2 -26   2   28.19    8.34
  -2 -26  -2   15.99    8.43
   2  26   2   30.49    8.83
   2 -26   3   -5.52    8.66
   2 -26   3  -13.13    7.68
  -2 -26  -3  -10.69   10.59
   2  26   3   28.66    9.81
   2 -26   4   36.69    8.15
   2 -26   4   56.82    9.28
  -2 -26  -4   48.18    9.32
   2  26   4   58.95    9.91
   2 -26   5   73.25    9.79
   2 -26   5   57.17    9.03
  -2 -26  -5   50.03   11.48
   2  26   5   52.69   10.24
   2 -26   6   16.05    7.95
   2 -26   6   -9.36    7.47
  -2 -26  -6   10.13   10.06
   2  26   6   28.93    9.80
   2 -26   7    5.68    6.51
   2 -26   7   -4.28    7.74
  -2 -26  -7    4.33    9.70
   2  26   7  -11.22    8.98
   2 -26   8    5.56    6.93
   2 -26   8    9.16    6.55
  -2 -26  -8    4.16    7.68
   2  26   8   -3.06    8.69
   2 -27  -9    8.43    7.74
  -2 -27   9    6.30    6.20
  -2 -27   9  -19.16    7.93
  -2  27   9    2.35    8.06
   2 -27  -8   26.70    8.46
  -2 -27   8   -2.23    7.28
  -2 -27   8    9.84    6.88
  -2  27   8    0.85    7.75
   2 -27  -7   12.82    9.19
  -2 -27   7   18.77    6.37
  -2 -27   7    8.82    7.91
  -2  27   7   14.38    8.60
   2 -27  -6   -9.03    9.56
  -2 -27   6   -2.03    7.96
  -2 -27   6   -9.15    7.19
  -2  27   6   18.00    9.64
   2 -27  -5   33.18    9.86
  -2 -27   5   21.88    8.60
  -2 -27   5   25.10    8.82
  -2  27   5   29.04   10.21
   2 -27  -4   13.68   10.20
  -2 -27   4   25.67    8.40
  -2 -27   4   13.96    7.94
  -2  27   4   -7.98   10.09
   2 -27  -3   38.33    9.48
  -2 -27   3   41.71    9.22
  -2 -27   3   33.52    8.12
  -2  27   3   41.92   10.11
   2 -27  -2   80.12   10.68
  -2 -27   2  110.90   10.75
  -2 -27   2   84.79    9.67
  -2  27   2   94.25   10.44
   2 -27  -1  108.40   11.33
  -2 -27   1  111.00   10.54
  -2 -27   1   89.66   10.21
   2  27  -1   96.48   10.13
  -2  27   1   99.38   11.15
   2 -27   0   56.06    9.37
  -2 -27   0   36.32    7.85
  -2 -27   0   69.28   10.72
   2  27   0   43.58    8.39
  -2  27   0   44.76    9.36
   2 -27   1   29.16    8.65
   2 -27   1    7.27    8.78
  -2 -27  -1   -0.24   10.26
   2  27   1   -0.05    8.62
  -2  27  -1    8.45    8.65
   2 -27   2   14.81    8.02
   2 -27   2    2.20    8.36
  -2 -27  -2    5.36    9.20
   2  27   2    6.03    9.13
   2 -27   3  128.50   10.72
   2 -27   3  116.60   10.95
  -2 -27  -3   96.77   12.32
   2  27   3  114.50   10.67
   2 -27   4   55.31    8.89
   2 -27   4   45.76    8.64
  -2 -27  -4   35.93   10.18
   2  27   4   23.89    9.29
   2 -27   5    0.96    8.25
   2 -27   5    5.16    7.48
  -2 -27  -5   11.88   10.14
   2  27   5   10.69    9.75
   2 -27   6    3.72    6.56
   2 -27   6    1.76    7.48
  -2 -27  -6    1.71    9.01
   2  27   6   -3.15    9.52
   2 -27   7   -4.36    6.71
   2 -27   7   16.27    7.20
  -2 -27  -7   10.67    8.54
   2  27   7  -13.91    9.25
   2 -27   8   -2.71    5.86
   2  27   8    6.55    8.77
   2 -28  -8   12.52    7.56
  -2 -28   8   10.89    8.25
  -2 -28   8   14.05    7.61
  -2  28   8    9.95    8.08
   2 -28  -7   -4.11    8.54
  -2 -28   7   -0.01    7.10
  -2 -28   7   -5.52    6.44
  -2  28   7   -3.11    8.54
   2 -28  -6   15.27    9.11
  -2 -28   6   23.86    7.27
  -2 -28   6   34.60    8.03
  -2  28   6   13.11    8.32
   2 -28  -5   11.15    8.24
  -2 -28   5   21.70    7.76
  -2 -28   5   16.33    7.78
  -2  28   5   30.72    9.13
   2 -28  -4   21.94   11.39
  -2 -28   4   19.25    8.51
  -2 -28   4   30.66    8.97
  -2  28   4   29.67    9.36
   2 -28  -3   33.50    8.14
  -2 -28   3    6.93    7.64
  -2 -28   3   22.41    7.75
  -2  28   3   22.92    8.97
   2 -28  -2  114.60   11.15
  -2 -28   2   94.87   10.08
  -2 -28   2   81.25    9.98
  -2  28   2  102.50   10.85
   2 -28  -1   -0.68    8.63
  -2 -28   1   21.27    8.16
  -2 -28   1    5.60    8.23
   2  28  -1    4.20    7.10
  -2  28   1    7.93    9.08
   2 -28   0    6.46    7.93
  -2 -28   0    3.50    8.29
  -2 -28   0    7.96    9.18
   2  28   0   16.37    8.11
  -2  28   0    3.99    8.92
   2 -28   1   21.27    7.82
   2 -28   1   23.93    8.39
  -2 -28  -1   26.08    9.63
   2  28   1   11.18    8.61
  -2  28  -1   11.88    8.97
   2 -28   2   26.08    7.90
   2 -28   2   36.82    7.29
  -2 -28  -2   34.88    9.76
   2  28   2   16.29    8.80
   2 -28   3   -4.77    7.61
   2 -28   3    6.55    7.23
  -2 -28  -3   18.33   11.25
   2  28   3   -1.66    7.86
   2 -28   4   77.89    7.88
   2 -28   4   91.48    9.93
  -2 -28  -4   91.94   10.90
   2  28   4   82.44   10.58
   2 -28   5   18.41    7.61
   2 -28   5   24.77    7.59
  -2 -28  -5   26.10    9.72
   2  28   5   10.25    9.34
   2 -28   6   23.74    7.20
   2 -28   6   25.58    6.71
  -2 -28  -6   13.39    9.82
   2  28   6   13.47    8.86
   2 -28   7   20.15    6.07
   2 -28   7    1.30    6.12
  -2 -28  -7    1.83    7.73
   2  28   7    5.82    9.15
   2 -29  -7   13.85    7.81
  -2 -29   7   23.69    8.64
  -2 -29   7    4.96    6.31
  -2  29   7    3.56    8.62
   2 -29  -6   29.88    8.07
  -2 -29   6   40.87    7.20
  -2 -29   6   36.41    7.59
  -2  29   6   48.42    9.17
   2 -29  -5  139.70   11.56
  -2 -29   5  139.00   10.91
  -2 -29   5  155.90   11.90
  -2  29   5  131.70   11.66
   2 -29  -4   34.04   10.04
  -2 -29   4   51.09    8.52
  -2 -29   4   31.63    8.14
  -2  29   4   21.22    8.99
   2 -29  -3   -1.07    8.26
  -2 -29   3    9.60    8.22
  -2 -29   3    6.18    7.67
  -2  29   3    6.16    7.81
   2 -29  -2   -7.42    8.10
  -2 -29   2   -5.56    7.88
  -2 -29   2    3.12    7.81
  -2  29   2   -0.33    8.97
   2 -29  -1   10.94    8.56
  -2 -29   1    8.86    7.69
  -2 -29   1    8.55    8.76
  -2  29   1   13.96    9.42
   2 -29   0    2.80    8.22
   2 -29   0    4.02    7.32
  -2 -29   0   -0.64    9.26
  -2 -29   0   -0.13    7.65
   2  29   0    3.64    7.65
  -2  29   0   19.45    9.22
   2 -29   1   25.59    8.17
   2 -29   1   36.68    7.45
  -2 -29  -1   35.08    9.87
   2  29   1   39.85    8.32
  -2  29  -1   33.18    7.95
   2 -29   2    9.20    7.92
   2 -29   2   17.00    7.34
  -2 -29  -2   -7.95    9.09
   2  29   2   -5.28    8.87
   2 -29   3   85.13    8.97
   2 -29   3   80.07    8.89
  -2 -29  -3  101.00   11.71
   2  29   3   70.60    9.48
   2 -29   4    6.28    7.11
   2 -29   4  -13.16    7.84
  -2 -29  -4  -13.69    9.18
   2  29   4    1.49    8.56
   2 -29   5    3.88    6.66
   2 -29   5   -0.13    7.31
  -2 -29  -5   -2.13    8.44
   2  29   5   12.44   10.00
   2 -29   6   11.27    6.74
   2 -29   6    5.82    6.94
  -2 -29  -6   -6.27    7.64
   2  29   6   -1.91    8.75
   2 -30  -6    1.93    7.09
  -2 -30   6    1.05    6.68
  -2 -30   6   -7.94    8.25
  -2  30   6   -6.25    9.00
   2 -30  -5    9.58    8.07
  -2 -30   5   -5.28    7.47
  -2 -30   5   -3.56    7.05
  -2  30   5   -3.62    9.36
   2 -30  -4  174.00   13.69
  -2 -30   4  153.80   11.97
  -2 -30   4  177.00   12.03
  -2  30   4  163.70   13.00
   2 -30  -3    3.01    8.52
  -2 -30   3    4.97    7.79
  -2 -30   3   -9.45    7.96
  -2  30   3   -1.49    7.92
   2 -30  -2   -4.18    8.78
  -2 -30   2   12.95    8.23
  -2 -30   2   -2.67    7.42
  -2  30   2   12.29    8.78
   2 -30  -1   24.74    8.57
  -2 -30   1    9.65    7.85
  -2 -30   1   11.47    8.85
  -2  30   1   15.50    8.84
   2 -30   0    4.02    7.67
   2 -30   0   -2.27    7.42
  -2 -30   0   -7.51    7.65
  -2 -30   0   12.62    9.42
   2  30   0    5.87    8.15
  -2  30   0   14.44    8.30
   2 -30   1    1.06    6.72
   2 -30   1    2.59    7.31
  -2 -30  -1   10.27    9.80
   2  30   1   -4.47    8.34
  -2  30  -1    1.00    6.28
   2 -30   2   61.70    8.68
   2 -30   2   65.94    8.84
  -2 -30  -2   70.06   10.58
   2  30   2   67.94   10.29
   2 -30   3   32.68    7.49
   2 -30   3   17.65    6.78
  -2 -30  -3   34.36   10.32
   2  30   3   62.07   10.11
   2 -30   4   40.38    7.88
   2 -30   4   42.28    7.17
  -2 -30  -4   32.95    8.16
   2  30   4   33.53    9.42
   2 -30   5    8.57    6.83
   2 -30   5   33.31    6.64
  -2 -30  -5   14.60    7.72
   2  30   5   26.94    9.06
   2 -31  -5    7.67    6.43
  -2 -31   5   28.42    8.72
  -2 -31   5    1.79    7.88
  -2  31   5   18.53    8.57
   2 -31  -4    7.49    8.48
  -2 -31   4   -2.34    6.90
  -2 -31   4  -13.22    7.95
  -2  31   4   -2.53    8.29
   2 -31  -3   74.71    8.71
  -2 -31   3   73.85    8.90
  -2 -31   3   61.47    8.45
  -2  31   3   58.66    9.23
   2 -31  -2    6.89    8.17
  -2 -31   2   -4.20    7.04
  -2 -31   2   -5.85    8.04
  -2  31   2   -4.50    7.84
   2 -31  -1    8.78    8.29
  -2 -31   1   21.71    9.01
  -2 -31   1   15.36    7.79
  -2  31   1   23.21    8.38
   2 -31   0    8.08    7.67
   2 -31   0    3.57    7.57
  -2 -31   0   -6.17    7.50
  -2 -31   0    6.74    8.61
   2  31   0    5.16    8.11
  -2  31   0    6.30    7.53
   2 -31   1   38.04    8.10
   2 -31   1   32.43    7.71
  -2 -31  -1   25.82    7.40
  -2 -31  -1   27.61    8.75
   2  31   1   30.58    8.67
   2 -31   2   22.03    6.96
   2 -31   2    9.48    7.06
  -2 -31  -2    1.04    9.28
   2  31   2   10.71    9.05
   2 -31   3   62.93    7.43
   2 -31   3   70.80    7.82
  -2 -31  -3   77.99   10.19
   2  31   3   62.71    9.87
   2 -31   4   14.49    8.57
   2 -31   4   -4.52    6.15
  -2 -31  -4   -5.58    7.57
   2  31   4    3.88    7.55
   2 -32  -4   32.56    7.56
  -2 -32   4   16.81    8.97
  -2 -32   4   22.98    8.82
  -2  32   4   20.16    7.34
   2 -32  -3    6.01    7.86
  -2 -32   3   13.25    7.47
  -2 -32   3   -5.74    8.02
  -2  32   3   -1.61    7.29
   2 -32  -2   40.61    7.19
  -2 -32   2   17.37    7.13
  -2 -32   2   31.02    8.05
  -2  32   2   31.32    8.12
   2 -32  -1   13.15    7.80
  -2 -32   1   16.80    7.30
  -2 -32   1   30.98    8.88
  -2  32   1   35.39    7.78
   2 -32   0   31.48    7.32
   2 -32   0   28.07    7.86
  -2 -32   0   24.33    8.46
  -2 -32   0   29.37    7.50
   2  32   0   14.17    7.87
  -2  32   0   22.89    8.17
   2 -32   1    8.26    7.19
   2 -32   1   -8.07    7.30
  -2 -32  -1    4.72    6.87
  -2 -32  -1   -6.04    6.99
   2  32   1    5.38    7.66
   2 -32   2   61.93    8.30
   2 -32   2   59.78    8.67
  -2 -32  -2   53.69    8.57
   2  32   2   53.69    7.70
   2 -32   3   -1.99    8.93
   2 -32   3   10.84    6.01
  -2 -32  -3    9.31    8.37
   2  32   3  -11.31    7.24
   2 -33  -2    0.38    6.08
  -2 -33   2    9.06    6.85
  -2 -33   2   -3.43    7.50
  -2  33   2   -2.78    6.89
   2 -33  -1   13.59    6.89
   2 -33  -1    1.34    7.75
  -2 -33   1   -5.53    7.36
  -2 -33   1   -6.54    6.99
  -2  33   1    5.35    5.77
   2 -33   0    5.70    6.77
   2 -33   0   -0.90    7.31
  -2 -33   0    4.05    6.96
  -2 -33   0   -1.78    7.98
  -2  33   0    5.13    5.69
   2 -33   1   -7.29    6.62
  -2 -33  -1  -16.44    7.36
   2  33   1   -4.65    6.50
   3   0 -15   -2.13    7.03
  -3   0  15   -1.35    7.55
   3   0 -13   15.47    9.06
  -3   0  13    2.95    9.53
   3   0 -12    9.02    9.78
  -3   0  12   14.33    9.40
   3   0 -11   30.07   10.46
  -3   0  11   30.43   10.32
   3   0 -10   85.33   11.02
  -3   0  10   99.27   12.28
   3   0  -9   15.01    9.12
  -3   0   9    5.33   10.15
   3   0  -8  127.20   11.88
  -3   0   8  111.70   11.68
   3   0  -7    7.31    7.89
  -3   0   7   -7.30    9.32
   3   0  -6   34.67    9.07
  -3   0   6   27.25   10.31
   3   0  -4  144.50   11.66
  -3   0   4  134.10   11.66
   3   0  -2 3769.00  184.50
  -3   0   2 4295.00  210.30
   3   0   0  488.90   24.68
   3   0   0  509.30   25.65
  -3   0   0  451.40   22.91
   3   0   1    3.93    5.46
   3   0   1   -1.12    4.78
  -3   0  -1    4.16    5.93
   3   0   2  372.80   19.76
  -3   0  -2  362.80   19.51
   3   0   3   -3.83    7.02
  -3   0  -3    2.26    6.65
   3   0   4  990.80   49.99
  -3   0  -4  832.60   42.24
   3   0   5    0.34    6.85
  -3   0  -5   -2.49    7.14
   3   0   6  815.50   41.92
  -3   0  -6  774.00   39.84
   3   0   7    8.02   10.10
  -3   0  -7   14.95    7.32
   3   0   8   65.54   10.89
  -3   0  -8   68.03    9.27
   3   0   9    9.35    9.18
  -3   0  -9   -1.94    8.49
   3   0  10   38.57    8.63
  -3   0 -10   35.46    8.71
   3   0  12  107.80   11.19
  -3   0 -12  102.80   10.69
   3   0  13    5.75    8.56
  -3   0 -13    0.55    7.22
   3  -1 -15   21.85    7.92
  -3  -1  15    2.75    7.86
   3   1 -15    0.56    6.09
  -3   1  15   23.37    8.35
   3  -1 -14    5.96    8.49
  -3  -1  14   -6.86    8.76
   3   1 -14   16.38    8.80
  -3   1  14   15.59    9.33
   3  -1 -13    7.17    9.62
  -3  -1  13   26.38    8.31
   3   1 -13    7.08    8.84
  -3   1  13   -1.62    9.45
   3  -1 -12    0.13   10.08
  -3  -1  12   11.60    8.83
   3   1 -12   19.96    9.97
  -3   1  12   -7.87   10.00
   3  -1 -11  106.30   11.85
  -3  -1  11   91.01   11.04
   3   1 -11  109.80   11.66
  -3   1  11  120.10   12.66
   3  -1 -10   88.28   11.44
  -3  -1  10   81.35   11.50
   3   1 -10   82.09   11.82
  -3   1  10   63.13   11.40
   3  -1  -9   97.10   11.22
  -3  -1   9  102.20   12.02
   3   1  -9  103.20   11.56
  -3   1   9   89.98   11.92
   3  -1  -8  205.90   14.92
  -3  -1   8  237.00   16.12
   3   1  -8  216.30   14.76
  -3   1   8  210.90   15.68
   3  -1  -7  122.40   11.65
  -3  -1   7  141.00   12.46
   3   1  -7  110.60   10.11
  -3   1   7  114.80   11.97
   3  -1  -6  246.30   16.20
  -3  -1   6  257.50   16.79
   3   1  -6  257.20   16.26
  -3   1   6  271.70   17.73
   3  -1  -5  852.20   43.75
  -3  -1   5  842.40   43.44
   3   1  -5  807.70   41.46
  -3   1   5  847.40   43.81
   3  -1  -4   58.48    9.54
  -3  -1   4   59.51    9.64
   3   1  -4   57.93    8.78
  -3   1   4   47.98    9.30
   3  -1  -3 2255.00  111.30
  -3  -1   3 2349.00  115.80
   3   1  -3 2192.00  108.10
  -3   1   3 2434.00  120.10
   3  -1  -1  499.10   25.72
  -3  -1   1  557.00   28.08
   3   1  -1  537.80   27.11
  -3   1   1  554.40   28.62
   3  -1   0   52.20    6.57
   3   1   0   46.16    3.17
   3   1   0   37.66    2.70
  -3   1   0   37.74    6.97
   3  -1   1  148.40   10.06
   3  -1   1  154.00   10.13
  -3  -1  -1  157.40    9.89
   3   1   1  134.20    8.54
   3  -1   2   64.30    7.28
  -3  -1  -2   59.94    6.29
   3   1   2   85.15    7.81
  -3   1  -2   59.32    7.46
   3  -1   3 2636.00  129.50
  -3  -1  -3 2475.00  121.50
   3   1   3 2374.00  116.80
  -3   1  -3 2269.00  111.70
   3  -1   4  338.10   19.23
  -3  -1  -4  345.30   19.21
   3   1   4  351.30   19.78
  -3   1  -4  330.40   18.75
   3  -1   5  820.50   41.56
  -3  -1  -5  865.30   43.97
   3   1   5  710.70   36.48
  -3   1  -5  734.30   37.93
   3  -1   6   62.94    8.68
  -3  -1  -6   66.88    8.62
   3   1   6   76.13    9.95
  -3   1  -6   67.64    8.36
   3  -1   7  326.80   19.74
  -3  -1  -7  301.60   17.75
   3   1   7  259.30   17.51
  -3   1  -7  289.20   17.56
   3  -1   8   34.50   10.22
  -3  -1  -8   12.62    8.77
   3   1   8   32.73    9.99
  -3   1  -8   35.61    8.77
   3  -1   9   17.87    9.56
  -3  -1  -9    7.51    8.24
   3   1   9   12.72    8.21
  -3   1  -9   27.55    8.63
   3  -1  10   17.04    8.26
  -3  -1 -10   14.65    8.03
   3   1  10   11.66    9.47
  -3   1 -10   10.73    8.53
   3  -1  11  541.70   28.94
  -3  -1 -11  461.00   25.37
   3  -1  12   26.58    9.36
  -3  -1 -12   -2.20    8.40
   3   1  12   36.08   10.58
  -3   1 -12    3.05    8.51
   3  -1  13   -0.81    8.10
  -3  -1 -13    4.28    7.05
   3   1  13  -20.28    8.79
  -3   1 -13    6.91    7.54
   3  -2 -15   -3.95    6.80
  -3  -2  15    9.60    7.66
   3   2 -15   -2.88    6.34
  -3   2  15    1.29    7.92
   3  -2 -14    8.10    8.79
  -3  -2  14   31.62    8.87
   3   2 -14   34.62    8.32
  -3   2  14   17.50    9.28
   3  -2 -13    0.42    9.59
  -3  -2  13    6.07    7.42
   3   2 -13   -2.82    8.64
  -3   2  13   -2.48    9.17
   3  -2 -12   22.45    9.80
  -3  -2  12   13.28    8.46
   3   2 -12   12.38    9.26
  -3   2  12   -5.24   10.11
   3  -2 -11    9.05    9.74
  -3  -2  11   25.70    9.02
   3   2 -11   28.52    9.54
  -3   2  11   13.58   11.03
   3  -2 -10   71.42   11.61
  -3  -2  10   82.54   11.04
   3   2 -10  116.40   12.91
  -3   2  10   73.02   12.10
   3  -2  -9    4.73    9.05
  -3  -2   9   20.04   10.20
   3   2  -9   36.54   10.65
  -3   2   9   -2.91   11.16
   3   2  -8  272.30   17.82
  -3   2   8  215.40   15.60
   3  -2  -7  119.50   12.10
  -3  -2   7  150.00   13.08
   3   2  -7  129.20   10.90
  -3   2   7  109.10   11.81
   3   2  -6   55.07    8.80
  -3   2   6   42.19   10.58
   3   2  -5  595.00   31.26
  -3   2   5  536.80   29.54
   3  -2  -4   10.10    9.32
  -3  -2   4   34.17    8.60
   3   2  -4   15.33    7.06
  -3   2   4    8.48    9.98
   3   2  -3  206.80   12.91
  -3   2   3  164.90   13.04
   3  -2  -2 1900.00   94.10
  -3  -2   2 1689.00   83.37
   3   2  -2 1588.00   78.35
  -3   2   2 1670.00   82.90
   3   2  -1   31.56    4.87
  -3   2   1   35.65    9.80
   3  -2   0  140.00   10.22
  -3   2   0  134.50   10.85
   3  -2   1  350.90   19.43
   3  -2   1  320.50   17.86
  -3  -2  -1  304.50   15.90
   3   2   1  328.20   17.12
   3  -2   2  112.00    9.10
  -3  -2  -2  106.70    8.45
   3   2   2  128.50    9.29
  -3   2  -2   99.01    9.45
   3  -2   3   14.87    6.95
  -3  -2  -3   19.78    6.52
   3   2   3   10.11    7.76
  -3   2  -3   17.75    7.70
   3  -2   4 1755.00   86.93
  -3  -2  -4 1726.00   85.52
   3   2   4 1777.00   87.96
  -3   2  -4 1761.00   87.27
   3  -2   5   37.52    7.33
  -3  -2  -5   46.78    8.48
   3   2   5   34.21    8.15
  -3   2  -5   23.08    8.59
   3  -2   6  199.30   13.18
  -3  -2  -6  191.20   13.29
   3   2   6  183.30   13.77
  -3   2  -6  188.30   13.49
   3  -2   7   39.05    9.08
  -3  -2  -7   45.83    8.96
   3   2   7   36.67    9.87
  -3   2  -7   34.25    8.84
   3  -2   8    6.18    9.37
  -3  -2  -8    2.24    8.29
   3   2   8   -8.41    9.38
  -3   2  -8    1.37    8.39
   3  -2   9   97.13   11.57
  -3  -2  -9   59.08    9.34
   3   2   9   70.86   10.50
  -3   2  -9   70.66   10.16
   3  -2  10   10.00    8.04
  -3  -2 -10   12.77    8.22
   3   2  10   26.96   10.13
  -3   2 -10   11.79    8.46
   3  -2  11    6.32    7.98
  -3  -2 -11   20.35    7.93
   3  -2  12   99.94   10.05
  -3  -2 -12   70.87    9.86
   3   2  12  109.10   11.94
  -3   2 -12   88.44   10.33
   3  -2  13    1.48    7.99
  -3  -2 -13    7.44    7.03
   3   2  13   -9.00    9.29
  -3   2 -13    5.52    6.69
   3  -3 -15    4.89    7.81
  -3  -3  15   -2.25    6.92
   3   3 -15    0.08    6.50
  -3   3  15    5.91    6.94
   3  -3 -14   23.23    9.87
  -3  -3  14   19.01    8.50
   3   3 -14   13.97    8.04
  -3   3  14   14.07    8.96
   3  -3 -13  -14.43   10.10
  -3  -3  13    5.77    7.80
   3   3 -13    3.61    7.81
  -3   3  13   -8.66    8.94
   3  -3 -12   10.08    9.53
  -3  -3  12    9.68    8.34
   3   3 -12   30.33    9.42
  -3   3  12    7.81   10.68
   3  -3 -11   43.46   11.05
  -3  -3  11   74.33   10.33
   3  -3 -10   12.55    9.93
  -3  -3  10   31.15    9.60
   3   3 -10   45.16   10.34
  -3   3  10   33.92   11.07
   3  -3  -9  196.70   15.05
  -3  -3   9  192.10   15.09
   3   3  -9  207.40   15.51
  -3   3   9  198.10   16.00
   3   3  -8   48.72    9.89
  -3   3   8   34.98   11.70
   3   3  -7  113.60   10.98
  -3   3   7   98.20   11.91
   3  -3  -6   32.60    9.64
  -3  -3   6   31.92    8.57
   3   3  -6   37.60    9.27
  -3   3   6   26.08   10.48
   3  -3  -5  874.90   45.11
  -3  -3   5  960.50   48.84
   3   3  -5  887.90   45.41
  -3   3   5  888.10   45.71
   3  -3  -4  112.30   11.21
  -3  -3   4  108.80   10.18
   3   3  -4  103.90   10.16
  -3   3   4  111.50   11.38
   3  -3  -3 1435.00   71.64
  -3  -3   3 1434.00   71.39
   3   3  -3 1520.00   75.58
  -3   3   3 1632.00   81.55
   3   3  -2   42.37    6.91
  -3   3   2   43.50   10.24
   3  -3  -1  103.60   10.44
  -3  -3   1   93.79    6.96
   3   3  -1  113.80    7.74
  -3   3   1  108.20   11.54
   3  -3   0    1.55    7.98
  -3  -3   0   20.15    2.75
  -3  -3   0   17.24    2.55
  -3   3   0   -1.58    8.39
   3  -3   1  123.70   10.55
   3  -3   1  116.60   10.71
  -3  -3  -1  122.40    7.90
   3   3   1  122.00    8.11
   3  -3   2  129.10   10.27
   3  -3   2  131.10   10.58
  -3  -3  -2  120.40    8.62
   3   3   2  117.40    8.82
  -3   3  -2  123.00   10.75
   3  -3   3 3247.00  159.40
  -3  -3  -3 2872.00  140.80
   3   3   3 2945.00  144.60
  -3   3  -3 2808.00  138.00
   3  -3   4   34.13    7.53
  -3  -3  -4   37.68    7.32
   3   3   4   38.38    8.92
  -3   3  -4   26.52    9.22
   3  -3   5  696.50   35.83
  -3  -3  -5  769.40   39.25
   3   3   5  699.40   36.29
  -3   3  -5  665.70   34.94
   3  -3   6   31.07    7.82
  -3  -3  -6   23.91    8.29
   3   3   6   23.59   10.06
  -3   3  -6   28.68    8.78
   3  -3   7  258.70   16.45
  -3  -3  -7  207.70   14.65
   3  -3   8   -2.84    8.90
  -3  -3  -8   12.04    9.48
   3   3   8    7.56    9.68
  -3   3  -8   -6.09    8.46
   3  -3   9   67.52   10.47
  -3  -3  -9   68.06    9.60
   3   3   9   71.89   11.13
  -3   3  -9   66.13   10.56
   3  -3  10   62.19    9.28
  -3  -3 -10   45.16    9.60
   3   3  10   50.19   11.40
  -3   3 -10   47.61    8.72
   3   3  11  208.90   14.83
  -3   3 -11  253.10   15.89
   3  -3  12   -5.07    7.78
  -3  -3 -12   -6.98    8.35
   3   3  12    0.08   10.35
  -3   3 -12   -5.59    8.14
   3  -3  13   16.23    7.67
  -3  -3 -13   14.83    7.67
   3   3  13    8.19    8.47
  -3   3 -13   19.94    6.83
   3  -4 -15   -2.10    8.34
  -3  -4  15    7.46    7.40
   3   4 -15   30.35    6.57
  -3   4  15   14.79    7.02
   3  -4 -14   37.79    9.95
  -3  -4  14   32.40    8.05
   3   4 -14   36.93    8.22
  -3   4  14   20.09    8.74
   3  -4 -13   13.80    9.53
  -3  -4  13   -6.49    7.72
   3   4 -13   12.16    7.95
  -3   4  13   -6.60    9.28
   3  -4 -12  -10.52    9.57
  -3  -4  12    0.13    8.17
   3   4 -12    4.08    7.95
  -3   4  12    2.08    8.80
   3  -4 -11   11.43   10.62
  -3  -4  11   35.11    9.11
   3   4 -11   23.93    9.06
  -3   4  11   15.78   10.05
   3  -4 -10   51.39   11.43
  -3  -4  10   59.60   10.15
   3   4 -10   83.64   10.91
  -3   4  10   48.09   10.94
   3  -4  -8  371.00   22.28
  -3  -4   8  401.50   23.12
   3   4  -8  405.00   22.79
  -3   4   8  416.60   24.85
   3  -4  -7   26.19    9.88
  -3  -4   7   40.41    9.22
   3   4  -7   33.10    8.20
  -3   4   7   19.33   10.01
   3  -4  -6   -0.33    9.30
  -3  -4   6    5.11    8.65
   3   4  -6   11.55    8.51
  -3   4   6   11.34   10.32
   3   4  -5   36.87    8.41
  -3   4   5   49.39   10.62
   3  -4  -4  387.30   22.23
  -3  -4   4  380.10   21.18
   3   4  -4  369.50   20.65
  -3   4   4  404.20   23.27
   3  -4  -3  965.40   49.54
  -3  -4   3  823.60   41.76
   3   4  -3  806.30   40.89
  -3   4   3  823.40   42.19
   3  -4  -2  349.60   20.40
  -3  -4   2  343.60   18.75
   3   4  -2  380.70   20.54
  -3   4   2  374.30   22.48
   3  -4  -1 1374.00   68.57
  -3  -4   1 1297.00   64.03
  -3  -4   1 1369.00   67.53
  -3   4   1 1346.00   67.47
   3  -4   0  724.10   37.48
  -3  -4   0  706.30   35.18
   3   4   0  762.50   37.87
  -3   4   0  707.30   36.87
   3  -4   1   41.33    9.07
   3  -4   1   28.72    9.23
  -3  -4  -1   29.01    5.48
   3   4   1   29.58    5.67
   3  -4   2   49.93    8.73
   3  -4   2   33.82    7.66
  -3  -4  -2   45.70    6.47
   3   4   2   50.78    6.44
   3  -4   3   77.61    8.96
  -3  -4  -3   66.83    8.07
   3   4   3   70.89    9.00
  -3   4  -3   66.17    9.64
   3  -4   4 1847.00   91.62
  -3  -4  -4 1816.00   89.89
   3   4   4 1757.00   87.05
  -3   4  -4 1784.00   88.68
   3  -4   5   40.77    7.72
  -3  -4  -5   51.90    7.88
   3   4   5   56.06    8.90
  -3   4  -5   48.73    8.94
   3  -4   6  553.10   29.13
  -3  -4  -6  552.70   29.55
   3   4   6  535.10   29.57
  -3   4  -6  509.60   27.85
   3  -4   7    9.62    8.55
  -3  -4  -7   31.05    9.25
   3   4   7   -2.65   10.76
  -3   4  -7   23.40    9.12
   3  -4   8   42.88    9.52
  -3  -4  -8   48.71   10.76
   3   4   8   53.92   10.93
  -3   4  -8   47.58    9.87
   3  -4   9   53.23    9.99
  -3  -4  -9   45.46   10.34
   3   4   9   52.06   11.09
  -3   4  -9   50.69    9.93
   3  -4  10    5.01    7.69
  -3  -4 -10   15.72    8.62
   3   4  10   11.85    9.88
  -3   4 -10   23.39    8.30
   3   4  11   35.70    9.75
  -3   4 -11   30.79    8.94
   3  -4  12   26.28    8.22
  -3  -4 -12   51.97    9.31
   3   4  12   38.73    9.34
  -3   4 -12   42.73    8.57
   3  -4  13   19.32    7.21
  -3  -4 -13    1.47    7.44
   3   4  13    0.21    8.02
  -3   4 -13   13.46    6.73
   3  -5 -15   11.88    7.88
  -3  -5  15   16.26    7.26
   3   5 -15    0.19    5.44
  -3   5  15   -5.83    6.92
   3  -5 -14   38.99   10.45
  -3  -5  14   24.23    7.92
   3   5 -14   26.81    7.56
  -3   5  14    7.03    8.44
   3  -5 -13   -8.22    8.88
  -3  -5  13   -0.76    8.06
   3   5 -13    3.40    7.83
  -3   5  13   -6.79    9.23
   3  -5 -12   71.25   11.00
  -3  -5  12   74.58    9.20
   3   5 -12   73.43    9.92
  -3   5  12   72.79   10.32
   3  -5 -11   18.24   10.58
  -3  -5  11   11.07    8.62
   3   5 -11   27.45    8.39
  -3   5  11   31.30   10.17
   3   5 -10   19.21    8.57
  -3   5  10   34.69    9.85
   3  -5  -9  205.10   15.96
  -3  -5   9  214.90   15.31
   3   5  -9  217.20   14.97
  -3   5   9  204.80   15.61
   3  -5  -8  233.00   16.61
  -3  -5   8  276.70   17.84
   3   5  -8  200.10   14.02
  -3   5   8  246.00   17.40
   3  -5  -7   51.11   10.76
  -3  -5   7   73.19    9.74
   3   5  -7   79.39    9.38
  -3   5   7   61.37   11.44
   3  -5  -6    1.07    9.37
  -3  -5   6    8.62    8.33
   3   5  -6    4.66    7.73
  -3   5   6   -1.38   10.15
   3  -5  -5  167.80   13.95
  -3  -5   5  186.00   13.31
   3   5  -5  183.60   12.72
  -3   5   5  186.50   13.70
   3  -5  -4  278.70   17.42
  -3  -5   4  229.90   14.31
   3   5  -4  254.10   15.48
  -3   5   4  285.50   18.53
   3  -5  -3 1658.00   82.42
  -3  -5   3 1541.00   76.36
   3   5  -3 1678.00   83.16
  -3   5   3 1682.00   83.79
   3  -5  -2   52.98   10.29
  -3  -5   2   38.48    7.48
   3   5  -2   55.17    8.12
  -3   5   2   39.22    9.95
   3  -5  -1   45.93    9.30
  -3  -5   1   38.96    6.42
  -3  -5   1   32.05    6.95
  -3   5   1   40.52   11.49
   3  -5   0  812.80   41.63
  -3  -5   0  690.00   34.64
   3   5   0  908.40   45.18
  -3   5   0  794.20   41.15
   3  -5   1  -11.28    8.87
   3  -5   1    1.74    9.10
  -3  -5  -1    1.97    5.57
   3   5   1   -2.13    5.69
  -3   5  -1   -3.36    8.69
   3  -5   2   -5.45    8.01
   3  -5   2    0.35    7.77
  -3  -5  -2   -0.58    6.29
   3   5   2   -7.31    6.33
   3  -5   3  586.10   30.62
   3  -5   3  583.80   30.68
  -3  -5  -3  584.30   30.22
   3   5   3  547.30   28.57
  -3   5  -3  564.90   30.05
   3  -5   4  313.40   18.73
  -3  -5  -4  297.30   17.32
   3   5   4  293.30   17.15
  -3   5  -4  264.90   16.92
   3  -5   5  911.30   46.37
  -3  -5  -5  957.00   48.57
   3   5   5  902.90   45.90
  -3   5  -5  881.50   45.24
   3  -5   6    8.52    7.42
  -3  -5  -6   15.78    8.14
   3   5   6   -1.25    9.77
  -3   5  -6    9.26    8.53
   3  -5   7   49.60    8.77
  -3  -5  -7   58.97    9.53
   3   5   7   43.38   11.82
  -3   5  -7   49.52    9.20
   3  -5   8  117.70   10.39
  -3  -5  -8  106.70   12.02
   3   5   8  124.70   12.60
  -3   5  -8  112.80   11.04
   3  -5   9   15.90    8.69
  -3  -5  -9   24.33   10.41
   3   5   9   23.83    9.56
  -3   5  -9   11.22    8.39
   3  -5  10  165.80   12.40
  -3  -5 -10  134.90   12.66
   3   5  10  139.60   12.75
  -3   5 -10  138.70   11.85
   3  -5  11  138.20   10.81
  -3  -5 -11  117.30   11.23
   3   5  11  103.80   10.94
  -3   5 -11  129.70   11.07
   3  -5  12   -1.10    7.96
  -3  -5 -12    0.82    8.96
   3   5  12   -1.66    9.12
  -3   5 -12    8.90    7.57
   3  -5  13    9.22    7.03
  -3  -5 -13   -4.34    7.51
   3   5  13   -2.28    7.48
  -3   5 -13    0.29    6.56
   3  -6 -15    3.56    8.25
  -3  -6  15    7.09    6.52
   3   6 -15    5.60    5.50
  -3   6  15    7.62    7.55
   3  -6 -14   15.52    9.39
  -3  -6  14   36.50    8.18
   3   6 -14   32.27    7.39
  -3   6  14   23.00    8.86
   3  -6 -13    3.99    9.30
  -3  -6  13   11.93    8.08
   3   6 -13    5.17    7.72
  -3   6  13   -5.13    9.23
   3  -6 -12    6.93   10.04
  -3  -6  12    7.45    8.33
   3   6 -12   11.83    8.11
  -3   6  12   -9.54    9.66
   3  -6 -11  104.10   12.33
  -3  -6  11   99.69   10.51
   3   6 -11  103.80   10.26
  -3   6  11   96.62   11.59
   3  -6 -10   38.04   10.87
  -3  -6  10   23.99    8.88
   3   6 -10   18.07    8.61
  -3   6  10   25.72   10.67
   3  -6  -9   84.63   11.80
  -3  -6   9   96.60   11.29
   3   6  -9   92.31   10.72
  -3   6   9  116.30   12.74
   3  -6  -8  488.00   27.45
  -3  -6   8  546.70   29.73
   3   6  -8  526.20   28.40
  -3   6   8  497.90   28.53
   3  -6  -7  478.90   27.06
  -3  -6   7  462.00   25.80
   3   6  -7  469.00   25.74
  -3   6   7  456.30   26.01
   3  -6  -6  409.80   23.76
  -3  -6   6  404.20   22.56
   3   6  -6  442.30   24.58
  -3   6   6  413.80   23.78
   3  -6  -5  866.70   45.04
  -3  -6   5  800.50   41.00
   3   6  -5  873.70   44.75
  -3   6   5  887.40   46.40
   3  -6  -4   60.79   10.58
  -3  -6   4   63.60    8.09
   3   6  -4   61.68    9.04
  -3   6   4   55.90   10.57
   3  -6  -3    1.69    8.72
  -3  -6   3    5.83    7.22
   3   6  -3   18.89    8.02
  -3   6   3   10.05   10.22
   3  -6  -2 1344.00   67.26
  -3  -6   2 1405.00   69.67
  -3  -6   2 1445.00   71.76
   3   6  -2 1438.00   71.30
  -3   6   2 1418.00   70.99
   3  -6  -1  310.10   18.60
  -3  -6   1  288.10   16.04
  -3  -6   1  307.80   17.24
  -3   6   1  299.90   19.44
   3  -6   0   53.25   10.42
  -3  -6   0   53.70    6.68
   3   6   0   41.17    5.90
  -3   6   0   56.09   10.90
   3  -6   1  283.80   17.01
   3  -6   1  290.40   17.70
  -3  -6  -1  314.30   16.80
   3   6   1  274.30   15.31
  -3   6  -1  248.20   15.87
   3  -6   2   42.04    8.63
   3  -6   2   48.03    8.54
  -3  -6  -2   48.46    7.60
   3   6   2   47.15    8.27
   3  -6   3  313.20   18.68
   3  -6   3  325.90   18.90
  -3  -6  -3  331.50   18.64
   3   6   3  308.10   17.89
   3  -6   4  102.50   10.28
   3  -6   4  121.00   10.36
  -3  -6  -4  120.50   10.34
   3   6   4  101.40    9.62
  -3   6  -4   92.48   10.89
   3  -6   5  195.30   14.03
  -3  -6  -5  206.20   14.13
   3   6   5  212.00   14.64
  -3   6  -5  192.90   14.17
   3  -6   6 1132.00   57.14
  -3  -6  -6 1046.00   53.17
   3   6   6  967.10   49.72
  -3   6  -6  944.10   48.37
   3  -6   7  228.70   15.04
  -3  -6  -7  199.10   14.44
   3   6   7  219.80   15.72
  -3   6  -7  223.30   15.55
   3  -6   8  126.90   11.51
  -3  -6  -8  161.00   13.58
   3   6   8  130.30   12.10
  -3   6  -8  138.60   11.87
   3  -6   9   55.60    9.35
  -3  -6  -9   46.36    9.82
   3   6   9   59.17   10.56
  -3   6  -9   62.71    9.66
   3  -6  10   -7.56    8.15
  -3  -6 -10   16.78    9.61
   3   6  10    8.16    9.03
  -3   6 -10    4.86    8.03
   3  -6  11   35.43    7.90
  -3  -6 -11   25.94    8.83
   3   6  11   31.37    9.56
  -3   6 -11   37.02    8.22
   3  -6  12   60.05    8.97
  -3  -6 -12   31.41    9.44
   3   6  12   22.35    9.05
  -3   6 -12   45.22    8.12
   3  -6  13    6.81    6.91
  -3  -6 -13    3.65    7.52
   3   6  13   -7.09    7.97
  -3   6 -13    0.81    6.46
   3  -7 -15   14.38    9.24
  -3  -7  15    7.77    5.63
   3   7 -15   -2.41    5.54
  -3   7  15    1.34    7.57
   3  -7 -14   16.35    8.81
  -3  -7  14   16.91    7.12
   3   7 -14   18.28    6.92
  -3   7  14    7.71    8.81
   3  -7 -13    1.26    9.91
  -3  -7  13   -6.17    7.52
   3   7 -13  -11.65    7.77
  -3   7  13   -8.38   10.08
   3  -7 -12   33.68   10.80
  -3  -7  12   23.99    8.79
   3   7 -12    9.69    7.74
  -3   7  12   18.98    9.32
   3  -7 -11   96.88   12.40
  -3  -7  11   81.24   10.22
   3   7 -11   86.85    9.84
  -3   7  11  118.90   11.67
   3  -7 -10   51.90   11.33
  -3  -7  10   32.19    8.91
   3   7 -10   41.07    8.96
  -3   7  10   23.48    9.95
   3  -7  -9   -6.34   10.27
  -3  -7   9  -22.46    8.96
   3   7  -9   -6.52    8.67
  -3   7   9   -7.57   10.08
   3  -7  -8  832.00   43.67
  -3  -7   8  928.80   47.88
   3   7  -8  894.80   45.99
  -3   7   8  862.60   45.27
   3  -7  -7  184.70   14.70
  -3  -7   7  199.70   14.04
   3   7  -7  208.30   14.72
  -3   7   7  200.80   16.06
   3  -7  -6    0.44    9.91
  -3  -7   6    8.72    7.38
   3   7  -6    4.56    8.38
  -3   7   6   -6.53   10.65
   3  -7  -5   51.62   10.49
  -3  -7   5   58.77    8.25
   3   7  -5   79.26   10.09
  -3   7   5   60.00   12.14
   3  -7  -4  289.90   18.50
  -3  -7   4  309.90   18.52
   3   7  -4  289.70   17.49
  -3   7   4  323.50   20.07
   3  -7  -3  189.60   13.94
  -3  -7   3  168.90   11.62
   3   7  -3  196.60   13.46
  -3   7   3  184.00   14.73
   3  -7  -2  267.10   16.93
  -3  -7   2  292.00   16.60
  -3  -7   2  297.60   17.26
  -3   7   2  294.90   19.01
   3  -7  -1  624.50   32.85
  -3  -7   1  621.20   31.85
  -3  -7   1  591.10   30.51
  -3   7   1  574.10   31.13
   3  -7   0  137.30   11.89
  -3  -7   0  135.40    9.85
   3   7   0  127.00    9.61
  -3   7   0  118.00   12.33
   3  -7   1   44.25    9.85
  -3  -7  -1   29.28    7.10
   3   7   1   38.62    7.63
  -3   7  -1   38.66    9.30
   3  -7   2  364.40   20.94
   3  -7   2  294.80   17.79
  -3  -7  -2  313.80   17.80
   3   7   2  274.00   16.38
   3  -7   3 2007.00   99.54
   3  -7   3 2003.00   99.22
  -3  -7  -3 1773.00   87.75
   3   7   3 1838.00   90.63
   3  -7   4 1858.00   92.41
   3  -7   4 1828.00   90.84
  -3  -7  -4 1667.00   82.74
   3   7   4 1714.00   85.12
  -3   7  -4 1762.00   87.83
   3  -7   5  102.10   10.83
  -3  -7  -5   88.96   10.24
   3   7   5   67.85   10.19
  -3   7  -5   97.18   11.19
   3  -7   6   99.95    9.89
  -3  -7  -6   73.55   10.62
   3   7   6   88.91   10.92
  -3   7  -6   72.34   10.54
   3  -7   7   36.18    8.71
  -3  -7  -7   25.88    9.58
   3   7   7   16.13    9.02
  -3   7  -7   29.35    9.30
   3  -7   8  101.70   10.27
  -3  -7  -8  102.30   11.60
   3   7   8  108.10   11.21
  -3   7  -8   94.91   11.02
   3  -7   9    9.73    8.65
  -3  -7  -9    6.53    8.23
   3   7   9    4.00    9.61
  -3   7  -9   12.04    8.63
   3  -7  10   98.67   10.66
  -3  -7 -10   73.46   11.51
   3   7  10   84.19   10.67
  -3   7 -10   75.65   10.10
   3  -7  11   57.86    8.50
  -3  -7 -11   33.27    9.66
   3   7  11   53.77    9.52
  -3   7 -11   72.68    9.31
   3  -7  12  -13.36    7.32
  -3  -7 -12    4.29    8.76
   3   7  12    7.43    8.94
  -3   7 -12   11.60    7.50
   3  -7  13   -5.95    6.67
  -3  -7 -13   12.96    7.51
   3   7  13   19.15    8.20
  -3   7 -13    0.84    6.51
  -3  -8  15   12.33    6.17
  -3   8  15   23.61    8.26
   3  -8 -14   10.62    9.52
  -3  -8  14   26.94    7.04
   3   8 -14   18.08    6.69
  -3   8  14   11.82   10.38
   3  -8 -13   10.39    9.76
  -3  -8  13  -10.58    7.38
   3   8 -13  -18.56    7.52
  -3   8  13    5.61   10.35
   3  -8 -12   11.64   10.34
  -3  -8  12   18.04    8.42
   3   8 -12   22.57    7.44
  -3   8  12    9.73    8.91
   3  -8 -11  115.20   12.83
  -3  -8  11  127.50   11.58
   3  -8 -10   53.33   11.36
  -3  -8  10   39.82    9.16
   3   8 -10   43.02    8.99
  -3   8  10   57.62   10.26
   3  -8  -9   15.91   10.68
  -3  -8   9    2.70    8.22
   3   8  -9   13.70    8.78
  -3   8   9   35.00   10.96
   3  -8  -8  111.40   13.33
  -3  -8   8  129.70   11.97
   3   8  -8  134.80   12.18
  -3   8   8  123.40   14.45
   3  -8  -7 1008.00   51.93
  -3  -8   7 1102.00   56.03
   3   8  -7 1037.00   52.88
  -3   8   7 1120.00   57.74
   3  -8  -6  896.40   46.67
  -3  -8   6  883.20   45.13
   3   8  -6  920.50   47.37
  -3   8   6  972.10   50.35
   3  -8  -5  459.40   25.95
  -3  -8   5  480.50   25.99
   3   8  -5  486.80   26.65
  -3   8   5  469.90   26.76
   3  -8  -4   37.97   10.76
  -3  -8   4   46.40    9.18
   3   8  -4   40.66    8.63
  -3   8   4   51.11   11.25
   3  -8  -3  141.20   12.83
  -3  -8   3  153.50   11.85
  -3  -8   3  124.90    9.79
   3   8  -3  144.10   11.30
  -3   8   3  139.20   12.98
   3  -8  -2   50.73    9.79
  -3  -8   2   47.39    7.88
  -3  -8   2   50.26    8.03
  -3   8   2   35.06   11.15
   3  -8  -1  903.60   46.22
  -3  -8   1  999.70   50.41
  -3  -8   1  936.10   47.07
  -3   8   1  875.40   45.37
   3  -8   0  202.30   14.31
  -3  -8   0  192.40   12.63
   3   8   0  201.90   13.27
  -3   8   0  191.20   15.45
   3  -8   1  672.70   35.68
  -3  -8  -1  618.80   31.77
   3   8   1  639.00   33.08
  -3   8  -1  621.00   33.12
   3  -8   2  389.60   22.90
   3  -8   2  383.70   22.05
  -3  -8  -2  365.40   20.25
   3   8   2  378.00   21.15
   3  -8   3 1514.00   75.72
   3  -8   3 1514.00   75.65
  -3  -8  -3 1543.00   76.63
   3   8   3 1482.00   73.67
   3  -8   4   14.56    9.01
   3  -8   4   36.63    9.04
  -3  -8  -4   42.58    9.32
   3   8   4   44.15    8.34
   3  -8   5    1.27    8.74
   3  -8   5    3.56    8.45
  -3  -8  -5    2.11    8.91
   3   8   5   10.46   10.12
  -3   8  -5   10.72    9.55
   3  -8   6  321.40   19.30
   3  -8   6  312.00   19.32
  -3  -8  -6  304.70   18.97
   3   8   6  347.50   21.02
  -3   8  -6  344.00   20.93
   3  -8   7   76.18    9.96
  -3  -8  -7   71.67   11.08
   3   8   7   52.65   10.38
  -3   8  -7   69.37   10.26
   3  -8   8  195.10   13.98
  -3  -8  -8  175.90   14.61
   3   8   8  161.20   12.48
  -3   8  -8  176.40   13.80
   3  -8   9    9.00    9.35
  -3  -8  -9   -3.00    9.37
   3   8   9   10.32    9.21
  -3   8  -9    9.84    8.70
   3  -8  10   14.92    8.18
  -3  -8 -10    2.58    8.91
   3   8  10    5.18    8.05
  -3   8 -10   -0.66    8.49
   3  -8  11   -5.20    7.49
  -3  -8 -11   26.10   10.63
   3   8  11   13.61   10.20
  -3   8 -11   -6.30    7.90
   3  -8  12   36.67    7.53
  -3  -8 -12   39.95   10.01
   3   8  12   14.27    9.45
  -3   8 -12   27.30    7.74
   3  -8  13    1.43    6.60
  -3  -8 -13    8.13    7.23
   3   8  13  -10.81    8.47
  -3   8 -13   -7.45    6.33
   3  -9 -14    1.39    8.86
  -3  -9  14   14.62    6.69
   3   9 -14   25.29    6.16
  -3   9  14   17.49    9.82
   3  -9 -13   17.14   10.46
  -3  -9  13   25.41    7.56
   3   9 -13   13.55    7.60
  -3   9  13   22.07   10.93
   3  -9 -12  100.50   12.39
  -3  -9  12  104.70   10.54
   3   9 -12   78.73    9.59
  -3   9  12  116.50   12.47
   3  -9 -11   17.31   10.72
  -3  -9  11   10.87    8.75
   3   9 -11   17.06    7.64
  -3   9  11   13.94   10.05
   3  -9 -10   12.36   10.64
  -3  -9  10    9.53    8.29
   3   9 -10   12.40    8.81
  -3   9  10    5.14   10.33
   3  -9  -9  152.00   14.27
  -3  -9   9  176.60   13.49
   3   9  -9  175.20   13.58
  -3   9   9  182.20   15.19
   3  -9  -8  442.90   25.89
  -3  -9   8  444.90   25.11
   3   9  -8  425.70   24.10
  -3   9   8  410.30   24.94
   3  -9  -7   12.99   10.25
  -3  -9   7   21.60    8.08
   3   9  -7   19.97    8.82
  -3   9   7   23.34   12.28
   3  -9  -6  235.20   16.73
  -3  -9   6  261.30   16.14
   3   9  -6  268.10   16.91
  -3   9   6  230.20   16.62
   3  -9  -5  905.60   46.79
  -3  -9   5  938.50   47.86
   3   9  -5  939.80   48.08
  -3   9   5  980.00   50.30
   3  -9  -4  921.50   47.34
  -3  -9   4  985.10   49.93
   3   9  -4 1011.00   51.38
  -3   9   4  960.60   49.56
   3  -9  -3  304.40   19.19
  -3  -9   3  295.90   17.75
  -3  -9   3  295.10   17.51
   3   9  -3  242.60   15.25
  -3   9   3  281.80   18.78
   3  -9  -2   -6.42    9.59
  -3  -9   2   -1.68    7.40
  -3  -9   2   -2.10    7.85
  -3   9   2    7.60   11.62
   3  -9  -1   18.42    9.65
  -3  -9   1   21.69    7.55
  -3  -9   1   26.39    8.53
   3   9  -1   23.93    8.19
  -3   9   1   24.78   11.50
   3  -9   0 2748.00  135.50
  -3  -9   0 2754.00  135.20
   3   9   0 2692.00  132.40
  -3   9   0 2577.00  127.30
   3  -9   1 1120.00   56.89
  -3  -9  -1 1052.00   52.60
   3   9   1 1035.00   52.14
  -3   9  -1 1101.00   55.94
   3  -9   2  457.80   25.59
   3  -9   2  439.20   24.52
  -3  -9  -2  461.50   25.02
   3   9   2  434.20   23.43
   3  -9   3  596.70   31.86
   3  -9   3  607.70   32.30
  -3  -9  -3  705.80   36.42
   3   9   3  638.60   33.44
   3  -9   4  656.60   34.83
   3  -9   4  621.50   33.11
  -3  -9  -4  571.80   30.30
   3   9   4  634.60   33.54
   3  -9   5  187.10   13.66
   3  -9   5  172.00   12.81
  -3  -9  -5  203.00   14.44
   3   9   5  193.20   13.95
  -3   9  -5  181.60   13.83
   3  -9   6   65.39    9.89
   3  -9   6   76.18   10.69
  -3  -9  -6   55.01   10.29
   3   9   6   50.07    9.71
  -3   9  -6   65.95   10.49
   3  -9   7   27.74    8.14
   3  -9   7    2.46    6.84
  -3  -9  -7   13.97   10.99
   3   9   7    4.80    9.12
  -3   9  -7   14.68    9.51
   3  -9   8   36.38    8.34
  -3  -9  -8   52.83   10.52
   3   9   8   48.61   10.28
  -3   9  -8   71.96   10.63
   3  -9   9  111.70   11.53
  -3  -9  -9   98.70   11.42
   3   9   9  105.20   12.98
  -3   9  -9   95.15   10.47
   3  -9  10   45.79    8.44
  -3  -9 -10   42.95    9.88
   3   9  10   49.91   10.34
  -3   9 -10   38.55    8.76
   3  -9  11   31.65    7.99
  -3  -9 -11   54.96   10.50
   3   9  11   47.47   10.95
  -3   9 -11   39.72    8.35
   3  -9  12    5.53    6.92
  -3  -9 -12   -5.20    9.30
   3   9  12    7.45   10.73
  -3   9 -12    7.94    7.28
   3  -9  13    2.03    5.53
  -3  -9 -13    1.40    7.29
   3   9  13   -1.44    8.49
  -3   9 -13    6.56    5.74
   3 -10 -14   15.85    8.87
  -3 -10  14   31.60    7.23
   3  10 -14   22.08    5.80
  -3  10  14   28.46    9.60
   3 -10 -13   -1.16    9.94
  -3 -10  13   -0.73    7.95
   3  10 -13    2.21    7.33
  -3  10  13  -10.81    9.86
   3 -10 -12   15.45   10.31
  -3 -10  12   14.08    7.74
   3  10 -12   33.94    7.84
  -3  10  12    5.21   10.38
   3 -10 -11  112.00   12.95
  -3 -10  11  135.30   11.79
   3  10 -11  124.50   11.02
  -3  10  11  128.10   12.99
   3 -10 -10    0.79   10.45
  -3 -10  10   -3.38    7.95
   3  10 -10   14.65    8.40
  -3  10  10    1.83   10.17
   3 -10  -9   26.09   11.05
  -3 -10   9   42.56    9.48
   3  10  -9   51.98    9.73
  -3  10   9   40.41   10.88
   3 -10  -8  186.50   15.33
  -3 -10   8  179.50   13.83
   3  10  -8  172.50   12.85
  -3  10   8  169.40   14.35
   3 -10  -7  810.00   42.56
  -3 -10   7  789.40   40.83
   3  10  -7  851.50   44.01
  -3  10   7  790.40   41.80
   3 -10  -6  103.20   11.80
  -3 -10   6  105.80   10.48
   3  10  -6   84.91   10.06
  -3  10   6   88.50   11.95
   3 -10  -5  118.80   11.85
  -3 -10   5  142.60   12.14
   3  10  -5  140.20   12.47
  -3  10   5  128.70   13.52
   3 -10  -4 1126.00   57.02
  -3 -10   4 1273.00   63.81
  -3 -10   4 1231.00   62.04
   3  10  -4 1218.00   61.31
  -3  10   4 1210.00   61.55
   3 -10  -3  595.30   32.40
  -3 -10   3  603.60   31.96
  -3 -10   3  625.60   32.78
  -3  10   3  623.70   34.07
   3 -10  -2 1227.00   62.04
  -3 -10   2 1302.00   65.01
  -3 -10   2 1305.00   65.43
  -3  10   2 1277.00   64.61
   3 -10  -1 2161.00  107.10
  -3 -10   1 2198.00  108.40
  -3 -10   1 2363.00  116.50
   3  10  -1 2252.00  111.10
  -3  10   1 2176.00  107.90
   3 -10   0 1508.00   75.45
  -3 -10   0 1511.00   75.07
   3  10   0 1460.00   72.55
  -3  10   0 1467.00   73.71
   3 -10   1   61.91   11.42
  -3 -10  -1   33.60    8.08
   3  10   1   48.25    9.22
  -3  10  -1   34.13   10.38
   3 -10   2  151.00   12.88
   3 -10   2  129.10   11.86
  -3 -10  -2  152.80   11.32
   3  10   2  145.10   11.46
   3 -10   3  483.00   26.71
   3 -10   3  486.10   26.96
  -3 -10  -3  477.10   25.92
   3  10   3  509.20   27.49
   3 -10   4   -0.92    9.15
   3 -10   4   -4.86    9.33
  -3 -10  -4   12.04    8.41
   3  10   4    8.06    9.30
   3 -10   5   27.27    8.84
   3 -10   5   45.42    9.42
  -3 -10  -5   20.84    9.84
   3  10   5   23.45    9.86
   3 -10   6  164.30   13.44
   3 -10   6  159.90   13.67
  -3 -10  -6  196.50   15.25
   3  10   6  174.00   13.26
  -3  10  -6  181.90   14.33
   3 -10   7   28.61    8.54
   3 -10   7   35.91    8.48
  -3 -10  -7   32.56   10.34
   3  10   7   46.90    9.44
  -3  10  -7   37.84    9.14
   3 -10   8  142.00   10.91
   3 -10   8  124.70   10.73
  -3 -10  -8  145.30   13.03
   3  10   8  135.00   12.61
  -3  10  -8  125.60   12.01
   3 -10   9   24.35    8.07
   3 -10   9   15.44    8.01
  -3 -10  -9   19.12    9.69
   3  10   9   10.30   11.06
  -3  10  -9   21.51    9.72
   3 -10  10    4.70    6.24
   3 -10  10   -4.81    7.97
  -3 -10 -10   -8.66    9.70
   3  10  10   24.35   10.63
  -3  10 -10    1.99    8.27
   3 -10  11   11.21    7.46
   3 -10  11   17.99    6.10
  -3 -10 -11   11.94    9.30
   3  10  11   23.33   11.13
  -3  10 -11    5.46    8.00
   3 -10  12   11.32    7.29
   3 -10  12    5.96    6.56
  -3 -10 -12   28.58   10.58
   3  10  12   13.64    9.68
  -3  10 -12   16.00    6.89
   3 -11 -14    0.02    8.48
  -3 -11  14   15.64    6.55
   3  11 -14   14.41    5.54
  -3  11  14   16.02    8.82
   3 -11 -13   29.23   10.15
  -3 -11  13   45.40    8.49
   3  11 -13   48.62    7.42
  -3  11  13   30.65    9.75
   3 -11 -12   23.13   10.39
  -3 -11  12   48.51    8.11
   3  11 -12   50.31    8.44
  -3  11  12   55.12   11.46
   3 -11 -11   12.90   10.67
  -3 -11  11   19.49    8.21
   3  11 -11   19.40    7.98
  -3  11  11   24.15   10.31
   3  11 -10   41.51    8.57
  -3  11  10   48.38   10.11
   3 -11  -9    6.11    8.90
  -3 -11   9    2.18    8.19
   3  11  -9   -3.93    7.94
  -3  11   9   19.37    9.73
   3 -11  -8  250.40   17.46
  -3 -11   8  267.30   16.83
   3  11  -8  292.70   18.01
  -3  11   8  275.20   17.65
   3 -11  -7   39.11   11.09
  -3 -11   7   40.70    9.08
   3  11  -7   40.43    9.32
  -3  11   7   43.45   11.91
   3 -11  -6  264.80   17.93
  -3 -11   6  260.90   16.96
   3  11  -6  266.40   16.95
  -3  11   6  227.70   17.31
   3 -11  -5  536.30   29.54
  -3 -11   5  511.80   27.62
  -3 -11   5  550.70   29.51
   3  11  -5  577.80   31.38
  -3  11   5  567.50   31.69
   3 -11  -4  729.20   38.26
  -3 -11   4  808.70   41.81
  -3 -11   4  754.30   38.86
   3  11  -4  715.60   37.45
  -3  11   4  791.20   41.33
   3 -11  -3  132.60   12.01
  -3 -11   3  160.70   12.43
  -3 -11   3  161.40   12.77
  -3  11   3  150.70   13.02
   3 -11  -2  243.30   17.05
  -3 -11   2  267.30   16.29
  -3 -11   2  283.00   17.80
  -3  11   2  248.30   17.79
   3 -11  -1    7.24   10.45
  -3 -11   1    1.81    8.15
  -3 -11   1   -2.02    8.29
   3  11  -1    9.27    8.20
  -3  11   1   -9.10   10.97
   3 -11   0  262.90   18.26
  -3 -11   0  225.50   14.92
   3  11   0  225.10   14.39
  -3  11   0  216.90   16.20
   3 -11   1  919.00   47.44
  -3 -11  -1  933.20   47.35
   3  11   1 1023.00   51.73
  -3  11  -1  890.10   46.08
   3 -11   2  204.60   15.51
   3 -11   2  177.10   13.58
  -3 -11  -2  184.90   13.19
   3  11   2  178.60   13.12
   3 -11   3  519.00   29.10
   3 -11   3  479.80   26.56
  -3 -11  -3  470.30   25.72
   3  11   3  488.90   26.64
   3 -11   4  220.00   15.99
   3 -11   4  237.90   16.16
  -3 -11  -4  211.80   14.84
   3  11   4  243.20   16.28
   3 -11   5    0.93    9.20
   3 -11   5   14.39    8.53
  -3 -11  -5   -0.57    9.36
   3  11   5   -8.29    9.99
   3 -11   6   35.76    9.91
   3 -11   6   39.26    9.48
  -3 -11  -6   40.16   10.80
   3  11   6   38.20    9.50
   3 -11   7   -6.42    8.14
   3 -11   7  -14.08    9.17
  -3 -11  -7   10.16   10.40
   3  11   7    9.46    8.49
  -3  11  -7   -8.85    9.10
   3 -11   8   48.30    8.73
   3 -11   8   41.01    7.79
  -3 -11  -8   60.07   12.08
   3  11   8   38.55    8.92
  -3  11  -8   56.61    9.58
   3 -11   9  145.80   11.58
   3 -11   9  155.40   11.90
  -3 -11  -9  136.60   12.80
   3  11   9  156.00   13.11
  -3  11  -9  162.60   12.95
   3 -11  10   48.62    8.67
   3 -11  10   38.80    7.87
  -3 -11 -10   55.85   10.35
   3  11  10   54.41   10.19
  -3  11 -10   36.89    8.41
   3 -11  11   20.65    7.22
   3 -11  11   16.73    6.85
  -3 -11 -11   16.49    9.34
   3  11  11   12.41    9.65
  -3  11 -11   17.01    7.35
   3 -11  12    7.97    6.39
   3 -11  12    7.25    6.66
  -3 -11 -12   15.59   10.20
   3  11  12    4.70    8.89
  -3  11 -12   10.98    6.65
   3 -12 -14   20.92    8.68
  -3 -12  14   27.01    6.75
   3  12 -14   27.72    6.05
  -3  12  14   24.51    8.28
   3 -12 -13    4.29    9.78
  -3 -12  13   -1.43    7.13
   3  12 -13    1.24    6.76
  -3  12  13   -9.08    7.57
   3 -12 -12   88.69   11.64
  -3 -12  12  101.00    9.66
   3  12 -12   88.09    9.39
  -3  12  12   71.05   10.09
   3 -12 -11   34.85   11.18
  -3 -12  11   41.68    7.77
   3  12 -11   31.17    8.02
  -3  12  11   39.01    9.06
   3 -12 -10   -0.36   10.75
  -3 -12  10    3.33    7.82
   3  12 -10   18.32    7.88
  -3  12  10   -2.77    9.23
   3 -12  -9   19.59    9.81
  -3 -12   9   11.56    8.31
   3  12  -9    7.41    8.40
  -3  12   9   24.17    9.34
   3 -12  -8    4.06   10.51
  -3 -12   8   12.12    7.93
   3  12  -8    0.62    8.57
  -3  12   8   11.03   10.44
   3 -12  -7  634.60   34.57
  -3 -12   7  554.50   29.75
   3  12  -7  550.70   30.08
  -3  12   7  588.20   32.85
   3 -12  -6 1208.00   61.45
  -3 -12   6 1101.00   56.38
  -3 -12   6 1368.00   68.82
   3  12  -6 1307.00   65.97
  -3  12   6 1200.00   61.22
   3 -12  -5  168.80   14.31
  -3 -12   5  162.80   12.08
   3  12  -5  180.80   13.51
  -3  12   5  169.80   14.16
   3 -12  -4   65.23   12.37
  -3 -12   4   78.57   10.27
  -3 -12   4   71.31    9.07
  -3  12   4   70.74   12.30
   3 -12  -3  114.60   12.02
  -3 -12   3  127.50   11.44
  -3 -12   3  146.20   11.95
  -3  12   3  151.50   14.14
   3 -12  -2   15.60   10.50
  -3 -12   2    9.42    8.81
  -3 -12   2   16.29    9.37
  -3  12   2   17.16   11.08
   3 -12  -1 1011.00   52.02
  -3 -12   1  985.10   49.92
  -3 -12   1 1027.00   52.15
   3  12  -1 1031.00   52.24
  -3  12   1 1090.00   56.04
   3 -12   0  332.60   20.80
  -3 -12   0  300.00   18.36
   3  12   0  283.90   17.20
  -3  12   0  296.60   19.73
   3 -12   1   27.36   10.84
  -3 -12  -1    9.69    8.46
   3  12   1   31.25    9.53
  -3  12  -1   17.22   10.27
   3 -12   2  555.10   30.75
   3 -12   2  575.70   31.05
  -3 -12  -2  627.80   33.21
   3  12   2  548.00   29.29
  -3  12  -2  525.50   28.70
   3 -12   3  213.30   15.74
   3 -12   3  226.90   15.17
  -3 -12  -3  236.30   15.45
   3  12   3  213.00   14.45
   3 -12   4   71.85   10.43
   3 -12   4   76.11   11.42
  -3 -12  -4   57.16    9.83
   3  12   4   70.66   10.38
   3 -12   5    3.17    8.32
   3 -12   5    1.98    9.23
  -3 -12  -5   31.92   10.24
   3  12   5   21.95    9.16
   3 -12   6   36.81    8.92
   3 -12   6   44.25    9.12
  -3 -12  -6   25.82   10.03
   3  12   6   47.67   10.08
   3 -12   7   23.27    8.19
   3 -12   7   31.70    9.48
  -3 -12  -7   35.37   10.66
   3  12   7   26.39   10.28
   3 -12   8  347.00   20.21
   3 -12   8  354.70   20.13
  -3 -12  -8  337.80   21.39
   3  12   8  340.90   21.26
  -3  12  -8  316.40   18.79
   3 -12   9   88.81    9.35
   3 -12   9   79.19    9.19
  -3 -12  -9   67.83   11.48
   3  12   9   79.96   10.11
  -3  12  -9  100.10   10.78
   3 -12  10    1.96    7.15
   3 -12  10   14.55    7.53
  -3 -12 -10   13.22   10.09
   3  12  10   10.07    9.24
  -3  12 -10    5.15    7.84
   3 -12  11    2.14    6.36
   3 -12  11    5.65    6.99
  -3 -12 -11   -0.25    9.97
   3  12  11    2.20    8.88
  -3  12 -11    7.17    7.19
   3 -12  12    6.97    6.16
   3 -12  12    4.45    6.41
  -3 -12 -12   -4.74    9.19
   3  12  12    7.79    8.32
  -3  12 -12   10.24    6.65
   3 -13 -14    1.90    8.54
  -3 -13  14   14.41    6.70
   3  13 -14    0.57    5.65
  -3  13  14   -6.38    8.45
   3 -13 -12   -1.29    9.63
  -3 -13  12   17.99    7.94
   3  13 -12   25.63    7.27
  -3  13  12   15.31    9.08
   3 -13 -11   98.00   12.36
  -3 -13  11   85.15    9.12
   3  13 -11   85.07    9.39
  -3  13  11   69.13   10.49
   3 -13 -10    3.58   10.67
  -3 -13  10   -8.55    7.89
   3  13 -10    4.22    8.00
  -3  13  10   -4.28   10.84
   3 -13  -9   54.75   11.11
  -3 -13   9   52.35    8.79
   3  13  -9   47.80    8.61
  -3  13   9   71.13   11.69
   3 -13  -8   45.96   10.98
  -3 -13   8   27.87    8.29
   3  13  -8   31.60    9.01
  -3  13   8   31.95   10.98
   3 -13  -7  277.10   18.39
  -3 -13   7  270.40   17.43
  -3 -13   7  250.10   16.37
   3  13  -7  245.60   16.93
  -3  13   7  277.80   19.20
   3 -13  -6  209.10   15.41
  -3 -13   6  217.50   15.30
  -3 -13   6  222.20   15.33
   3  13  -6  224.60   15.64
  -3  13   6  190.90   16.40
   3 -13  -5  116.60   11.85
  -3 -13   5  159.60   13.09
  -3 -13   5  147.20   11.42
  -3  13   5  144.20   14.36
   3 -13  -4  401.20   24.04
  -3 -13   4  368.70   21.21
  -3 -13   4  410.50   23.30
  -3  13   4  383.70   23.64
   3 -13  -3   75.06   10.35
  -3 -13   3   72.03    9.86
  -3 -13   3   72.95    9.37
  -3  13   3   67.78   10.36
   3 -13  -2   16.68    9.97
  -3 -13   2   -5.21    8.99
  -3 -13   2    3.15    8.63
  -3  13   2    5.39   10.88
   3 -13  -1  136.60   13.19
  -3 -13   1  119.40   10.81
  -3 -13   1  135.30   11.35
   3  13  -1  129.50   10.87
  -3  13   1  139.60   13.66
   3 -13   0  925.30   47.80
  -3 -13   0  978.00   49.85
   3  13   0  924.40   46.86
  -3  13   0  876.40   45.62
   3 -13   1  191.70   14.34
  -3 -13  -1  220.40   15.10
   3  13   1  217.50   14.59
  -3  13  -1  228.70   16.59
   3 -13   2   95.14   11.08
   3 -13   2   92.70   12.19
  -3 -13  -2   77.86   11.24
   3  13   2   70.46    9.96
  -3  13  -2   71.87   11.48
   3 -13   3  534.70   29.92
   3 -13   3  499.60   27.53
  -3 -13  -3  522.70   28.31
   3  13   3  505.70   28.25
   3 -13   4  222.30   16.34
   3 -13   4  220.60   15.46
  -3 -13  -4  215.60   15.48
   3  13   4  240.00   16.94
   3 -13   5  248.90   16.56
   3 -13   5  218.40   15.63
  -3 -13  -5  219.20   15.28
   3  13   5  226.40   15.21
   3 -13   6   41.25    9.27
   3 -13   6   59.62    9.36
  -3 -13  -6   33.56   11.11
   3  13   6   24.20    9.68
   3 -13   7  122.40   11.27
   3 -13   7  138.90   11.89
  -3 -13  -7  107.90   12.52
   3  13   7  125.30   13.24
   3 -13   8   11.47    7.96
   3 -13   8   -7.42    7.15
  -3 -13  -8   -4.61   10.99
   3  13   8   -4.06   10.91
   3 -13   9   78.64    8.93
   3 -13   9   53.66    8.75
  -3 -13  -9   72.67   12.27
   3  13   9   61.17   10.73
   3 -13  10   -0.87    7.43
   3 -13  10   -2.87    6.88
  -3 -13 -10   -8.91    9.99
   3  13  10   17.14    9.53
   3 -13  11   11.15    7.12
   3 -13  11   16.34    6.59
  -3 -13 -11   12.72   10.01
   3 -13  12    3.49    5.88
   3 -13  12   -0.14    6.06
  -3 -13 -12    0.97    8.40
   3  13  12  -13.16    8.57
  -3  13 -12    0.53    6.36
   3 -14 -14   15.20    8.00
  -3 -14  14   26.48    5.97
   3  14 -14   27.84    6.44
  -3  14  14   29.21    8.16
   3 -14 -13   -6.12    9.41
  -3 -14  13  -10.00    7.06
   3  14 -13   -0.22    6.83
  -3  14  13  -11.65    8.19
   3 -14 -12   62.76   10.65
  -3 -14  12   68.14    8.37
   3  14 -12   52.02    7.88
  -3  14  12   49.30   10.80
   3 -14 -11   14.40   10.59
  -3 -14  11   11.19    7.62
   3  14 -11    7.73    7.74
  -3  14  11    5.11    9.42
   3 -14 -10   32.67   10.23
  -3 -14  10   -0.30    7.86
   3  14 -10   18.59    8.24
  -3  14  10    7.09   10.26
   3 -14  -9   30.42   10.48
  -3 -14   9   44.70    8.38
   3  14  -9   23.70    8.64
  -3  14   9   33.84   11.50
   3 -14  -8    9.12   10.01
  -3 -14   8   -1.30    7.87
  -3 -14   8   12.60    7.83
   3  14  -8    9.11    8.38
  -3  14   8   25.00   11.58
   3 -14  -7   96.51   12.11
  -3 -14   7  129.00   11.43
  -3 -14   7  118.10   10.92
   3  14  -7  125.70   11.54
  -3  14   7  134.70   13.75
   3 -14  -6  559.80   31.29
  -3 -14   6  622.90   33.31
  -3 -14   6  590.40   31.57
   3  14  -6  498.40   27.55
  -3  14   6  579.50   31.77
   3 -14  -5   40.06    9.62
  -3 -14   5   64.15   10.20
  -3 -14   5   33.72    8.64
  -3  14   5   24.60   12.00
   3 -14  -4   31.31   11.12
  -3 -14   4   21.12    7.85
  -3 -14   4   23.37    8.74
  -3  14   4   31.69   11.79
   3 -14  -3   -3.14    8.43
  -3 -14   3   15.52    8.88
  -3 -14   3   33.77   10.05
  -3  14   3   12.97   11.39
   3 -14  -2  225.30   17.17
  -3 -14   2  216.00   14.98
  -3 -14   2  226.60   16.21
  -3  14   2  218.80   16.84
   3 -14  -1  141.00   13.47
  -3 -14   1  133.20   11.50
  -3 -14   1  131.60   12.27
   3  14  -1  121.50   10.71
  -3  14   1  134.00   13.33
   3 -14   0 1138.00   57.79
  -3 -14   0 1148.00   58.07
   3  14   0 1170.00   58.91
  -3  14   0 1123.00   57.51
   3 -14   1  138.30   13.29
  -3 -14  -1  138.70   12.39
   3  14   1  117.70   11.89
  -3  14  -1  151.60   13.91
   3 -14   2  353.30   21.78
   3 -14   2  351.70   21.09
  -3 -14  -2  338.30   20.27
   3  14   2  320.80   20.30
  -3  14  -2  319.20   20.35
   3 -14   3  374.50   22.14
   3 -14   3  407.40   23.28
  -3 -14  -3  350.00   20.36
   3  14   3  373.90   22.00
   3 -14   4  419.10   24.57
   3 -14   4  415.20   23.73
  -3 -14  -4  449.30   25.39
   3  14   4  442.90   25.10
   3 -14   5  101.50   11.14
   3 -14   5   89.24    9.91
  -3 -14  -5  100.50   12.23
   3  14   5   89.32   10.77
   3 -14   6  260.30   17.11
   3 -14   6  283.80   17.94
  -3 -14  -6  286.20   18.83
   3  14   6  307.30   19.13
   3 -14   7  -14.22    8.08
   3 -14   7    6.53    8.92
  -3 -14  -7   -7.32   10.90
   3  14   7   -4.06   10.81
   3 -14   8  164.60   12.88
   3 -14   8  163.90   12.77
  -3 -14  -8  178.60   14.55
   3  14   8  155.10   13.78
   3 -14   9   18.41    7.58
   3 -14   9    3.04    7.87
  -3 -14  -9    3.60   10.45
   3  14   9   11.60    9.79
   3 -14  10    5.27    7.59
   3 -14  10    7.70    6.89
  -3 -14 -10    2.94   10.43
   3  14  10   15.91    9.98
   3 -14  11    5.71    6.94
   3 -14  11   -5.96    6.69
  -3 -14 -11  -15.63   10.15
   3  14  11   -5.28    9.94
   3 -14  12   -3.58    5.36
   3 -14  12   -2.18    5.99
  -3 -14 -12   16.64    8.90
   3  14  12  -16.58    8.93
   3 -15 -13   49.00    9.50
  -3 -15  13   80.16    8.38
  -3 -15  13   60.03    7.42
   3  15 -13   60.65    7.62
  -3  15  13   59.25    9.72
   3 -15 -12  -26.55    9.95
  -3 -15  12   -2.03    6.52
   3  15 -12   15.63    6.94
  -3  15  12    3.44   10.57
   3 -15 -11   11.61   10.58
  -3 -15  11   12.12    7.05
  -3 -15  11   10.68    7.59
   3  15 -11    9.51    7.81
  -3  15  11   21.68   10.06
   3 -15 -10    9.68    9.50
  -3 -15  10    1.39    8.06
  -3 -15  10    5.70    6.86
   3  15 -10   -0.86    7.44
  -3  15  10   13.77   10.67
   3 -15  -9    3.97    9.66
  -3 -15   9    0.84    7.61
  -3 -15   9    3.89    7.76
   3  15  -9   -3.76    7.76
  -3  15   9   25.96   11.75
   3 -15  -8   13.08   10.82
  -3 -15   8   11.19    7.34
  -3 -15   8   36.25    8.51
   3  15  -8   20.01    8.76
  -3  15   8   15.48   11.23
   3 -15  -7  -14.18   10.08
  -3 -15   7   11.67    8.07
  -3 -15   7   -3.78    8.42
   3  15  -7    4.85    7.71
  -3  15   7  -13.10    9.23
   3 -15  -6   52.34   10.64
  -3 -15   6   44.51    9.83
  -3 -15   6   41.66    8.55
  -3  15   6   52.16   11.27
   3 -15  -5  621.30   33.46
  -3 -15   5  646.00   33.89
  -3 -15   5  705.10   37.33
  -3  15   5  688.80   37.30
   3 -15  -4   -5.74   10.58
  -3 -15   4    4.48    9.75
  -3 -15   4   17.72    8.84
  -3  15   4   37.97   10.08
   3 -15  -3   -2.94   10.09
  -3 -15   3   -9.46    8.71
  -3 -15   3   -4.37    9.05
  -3  15   3   14.88   10.85
   3 -15  -2   34.60   10.37
  -3 -15   2   16.87    8.79
  -3 -15   2   19.03   10.22
  -3  15   2   28.21   11.81
   3 -15  -1    3.75    9.94
  -3 -15   1   -7.66    8.46
  -3 -15   1   -0.57    8.03
   3  15  -1    9.67    8.88
  -3  15   1    4.48   11.48
   3 -15   0   44.30   10.80
  -3 -15   0   48.71    9.65
   3  15   0   62.42   10.34
  -3  15   0   59.72   11.15
   3 -15   1 1485.00   74.80
  -3 -15  -1 1457.00   72.95
   3  15   1 1471.00   73.92
  -3  15  -1 1456.00   73.57
   3 -15   2   37.71    9.84
   3 -15   2   25.62   10.63
  -3 -15  -2   33.64    9.47
   3  15   2    9.07   11.03
  -3  15  -2   23.30   10.51
   3 -15   3   81.42   10.35
   3 -15   3  102.90   11.98
  -3 -15  -3  100.80   10.83
   3  15   3   94.97   11.68
   3 -15   4  133.60   13.14
   3 -15   4  108.80   11.47
  -3 -15  -4  156.90   13.96
   3  15   4  105.30   12.03
   3 -15   5   26.05    8.51
   3 -15   5   30.06    9.05
  -3 -15  -5   32.18    9.92
   3  15   5   34.05    9.45
   3 -15   6  -10.64    8.16
   3 -15   6    0.67    7.53
  -3 -15  -6  -13.96    9.27
   3  15   6    8.77    9.62
   3 -15   7   -5.78    8.28
   3 -15   7   15.91    9.47
  -3 -15  -7   -6.18    9.75
   3  15   7    0.41   10.62
   3 -15   8    5.16    8.92
   3 -15   8    5.33    8.28
  -3 -15  -8   16.66   10.81
   3  15   8   11.31    8.75
   3 -15   9  146.40   11.27
   3 -15   9  146.30   11.60
  -3 -15  -9  171.10   15.26
   3  15   9  137.90   12.75
   3 -15  10   -1.10    7.50
   3 -15  10    0.14    7.00
  -3 -15 -10   -7.37    9.33
   3  15  10   10.78    9.85
   3 -15  11   -0.39    6.96
   3 -15  11    4.97    6.70
  -3 -15 -11  -11.66   10.63
   3  15  11   10.06    9.67
   3 -15  12    5.10    6.05
   3 -15  12    5.54    5.37
  -3 -15 -12   -1.85    8.37
   3  15  12   -1.70    9.51
   3 -16 -13  -13.14    8.09
  -3 -16  13    8.96    7.09
  -3 -16  13   -1.15    5.98
   3  16 -13    1.23    6.10
  -3  16  13    6.33    9.31
   3 -16 -12   70.55   11.27
  -3 -16  12   88.02    8.59
  -3 -16  12   71.39    8.31
   3  16 -12   77.87    8.24
  -3  16  12   76.28   11.47
   3 -16 -11   -2.12    9.74
  -3 -16  11   -0.15    7.08
  -3 -16  11   -9.13    7.07
   3  16 -11    0.67    7.21
  -3  16  11   -6.03    9.92
   3 -16 -10   -7.91    8.27
  -3 -16  10   11.61    7.52
  -3 -16  10   -2.33    7.73
   3  16 -10    5.03    7.52
  -3  16  10   15.59   10.25
   3 -16  -9   26.03   10.29
  -3 -16   9    4.27    8.10
  -3 -16   9   17.07    7.65
   3  16  -9   28.73    8.25
  -3  16   9    8.06   10.87
   3 -16  -8   19.27   10.66
  -3 -16   8   30.00    8.35
  -3 -16   8   23.00    8.22
   3  16  -8   16.36    7.56
  -3  16   8    4.12   10.30
   3 -16  -7    5.45    9.69
  -3 -16   7    2.70    7.90
  -3 -16   7   -2.02    8.74
  -3  16   7   -6.36   10.38
   3 -16  -6  351.70   21.45
  -3 -16   6  373.00   21.61
  -3 -16   6  399.90   22.82
  -3  16   6  367.90   22.70
   3 -16  -5   71.66   10.36
  -3 -16   5   59.53    8.88
  -3 -16   5   79.62   10.57
  -3  16   5   62.01   12.04
   3 -16  -4  112.20   13.05
  -3 -16   4   98.86   11.47
  -3 -16   4  124.00   11.93
  -3  16   4  126.80   13.95
   3 -16  -3   31.15    9.58
  -3 -16   3   44.92    9.00
  -3 -16   3   13.44    9.29
  -3  16   3   33.23   12.14
   3 -16  -2  401.20   23.57
  -3 -16   2  390.60   22.61
  -3 -16   2  395.70   23.13
  -3  16   2  419.00   25.34
   3 -16  -1   25.11   10.55
  -3 -16   1   15.21    9.82
  -3 -16   1   15.16    8.23
   3  16  -1   18.09    9.41
  -3  16   1   -2.93   11.41
   3 -16   0 1626.00   81.58
  -3 -16   0 1515.00   75.76
   3  16   0 1827.00   91.31
  -3  16   0 1627.00   81.51
   3 -16   1    2.09    9.89
  -3 -16  -1    7.92    8.72
   3  16   1   -8.75   11.30
  -3  16  -1   -8.78   10.79
   3 -16   2   13.48    9.77
   3 -16   2    3.18    8.95
  -3 -16  -2   -7.94    8.81
   3  16   2   -8.66   10.40
  -3  16  -2    4.85   10.22
   3 -16   3   41.02   11.27
   3 -16   3    0.74    9.12
  -3 -16  -3    8.44    8.77
   3  16   3   13.25    9.57
   3 -16   4   22.29    8.71
   3 -16   4   30.64    8.81
  -3 -16  -4   25.54    9.32
   3  16   4   15.22    8.75
   3 -16   5   15.80    9.02
   3 -16   5    7.76    8.44
  -3 -16  -5   -0.61    9.76
   3  16   5    7.88    8.62
   3 -16   6   38.97    8.49
   3 -16   6   16.49    8.58
  -3 -16  -6   20.57    9.53
   3  16   6   28.15   10.41
   3 -16   7    8.98    8.48
   3 -16   7   11.22    7.99
  -3 -16  -7   -0.57   10.89
   3  16   7   -7.72    9.58
   3 -16   8  285.30   18.09
   3 -16   8  307.20   18.38
  -3 -16  -8  288.60   19.04
   3  16   8  333.90   19.68
   3 -16   9   19.78    7.50
   3 -16   9    5.10    7.33
  -3 -16  -9    7.95   10.21
   3  16   9   -0.87   10.42
   3 -16  10    4.24    7.14
   3 -16  10   -4.02    6.50
  -3 -16 -10   -0.29   11.33
   3  16  10    9.87   10.45
   3 -16  11    7.74    6.52
   3 -16  11  -14.52    6.93
  -3 -16 -11   -5.30    9.73
   3  16  11    6.88    9.22
   3 -17 -13   15.30    7.94
  -3 -17  13    8.18    6.08
  -3 -17  13   16.62    5.30
   3  17 -13   21.27    5.88
  -3  17  13    7.56    9.92
   3 -17 -12   -4.88    9.74
  -3 -17  12    6.41    7.11
  -3 -17  12   -1.76    6.25
   3  17 -12    6.38    6.67
  -3  17  12    1.59    9.20
   3 -17 -11   59.42   10.63
  -3 -17  11   38.88    7.48
  -3 -17  11   56.96    7.97
   3  17 -11   53.67    8.04
  -3  17  11   65.54   11.14
   3 -17 -10    2.16   10.56
  -3 -17  10  -11.18    7.42
  -3 -17  10   -2.93    7.02
   3  17 -10    4.45    7.39
  -3  17  10  -21.23   10.50
   3 -17  -9   12.51    9.15
  -3 -17   9   -3.76    7.17
  -3 -17   9   -1.74    7.59
  -3  17   9    8.05    9.22
   3 -17  -8   -3.36   10.58
  -3 -17   8   18.85    8.60
  -3 -17   8    6.17    8.03
  -3  17   8   10.09   10.71
   3 -17  -7   18.09   10.05
  -3 -17   7   25.05    8.34
  -3 -17   7   34.68    8.89
  -3  17   7   48.07   10.19
   3 -17  -6   25.87   10.50
  -3 -17   6   43.66    8.88
  -3 -17   6   44.52    9.97
  -3  17   6   29.32   11.44
   3 -17  -5  126.60   11.77
  -3 -17   5  106.60   10.46
  -3 -17   5  102.70   11.38
  -3  17   5  120.50   13.12
   3 -17  -4   27.22   11.00
  -3 -17   4   34.41    8.73
  -3 -17   4   46.03   10.20
  -3  17   4   31.06   11.90
   3 -17  -3   26.93    8.95
  -3 -17   3   12.03   10.50
  -3 -17   3    2.88    8.32
  -3  17   3   -0.52   10.68
   3 -17  -2    0.19   11.07
  -3 -17   2    8.73    8.80
  -3 -17   2    0.05    8.60
  -3  17   2    3.86   12.25
   3 -17  -1  164.40   13.16
  -3 -17   1  172.20   14.18
  -3 -17   1  145.20   11.92
   3  17  -1  164.10   13.39
  -3  17   1  152.80   14.41
   3 -17   0   40.58   11.00
  -3 -17   0   55.10   10.59
   3  17   0   35.81   10.47
  -3  17   0   34.06   10.57
   3 -17   1   29.21   10.43
  -3 -17  -1   -1.74    9.02
   3  17   1   11.46   10.17
  -3  17  -1   17.59   10.57
   3 -17   2   77.08   10.90
   3 -17   2   97.83   11.81
  -3 -17  -2   95.92   10.53
   3  17   2  110.00   12.07
  -3  17  -2   80.93   11.59
   3 -17   3  262.30   17.25
   3 -17   3  268.10   16.98
  -3 -17  -3  266.40   17.21
   3  17   3  238.70   16.19
   3 -17   4   34.27    9.64
   3 -17   4    9.17    9.26
  -3 -17  -4   11.39   10.32
   3  17   4   17.15    8.73
   3 -17   5   98.11   10.07
   3 -17   5   93.36   10.54
  -3 -17  -5   87.47   11.95
   3  17   5   82.48   11.37
   3 -17   6   92.23    9.99
   3 -17   6   91.39   10.01
  -3 -17  -6   94.76   11.02
   3  17   6   99.68   12.51
   3 -17   7   27.57    9.17
   3 -17   7   34.40    8.26
  -3 -17  -7   29.08    9.80
   3  17   7   47.58   10.05
   3 -17   8   35.88    9.50
   3 -17   8   28.03    8.10
  -3 -17  -8   16.73   11.41
   3  17   8    9.34    9.66
   3 -17   9  108.90    9.77
   3 -17   9   94.99    9.22
  -3 -17  -9  133.70   13.33
   3  17   9  128.60   11.83
   3 -17  10    2.96    6.92
   3 -17  10   -8.94    6.93
  -3 -17 -10  -10.82   11.31
   3  17  10  -12.42    9.19
   3 -17  11  -15.23    6.48
   3 -17  11    2.80    6.38
  -3 -17 -11   14.96    9.07
   3  17  11   -3.18    8.26
   3 -18 -13   -3.10    7.75
  -3 -18  13    4.58    6.54
  -3 -18  13   11.10    5.02
   3  18 -13    5.08    5.30
  -3  18  13   -1.59    9.21
   3 -18 -12   37.27    9.99
  -3 -18  12   35.49    7.22
  -3 -18  12   50.68    7.53
   3  18 -12   42.45    7.22
  -3  18  12   50.92    9.72
   3 -18 -11   17.66   10.19
  -3 -18  11   15.67    7.30
  -3 -18  11   24.43    6.76
  -3  18  11   11.13   10.40
   3 -18 -10   -2.10    8.15
  -3 -18  10    0.87    7.15
  -3 -18  10    5.67    6.66
  -3  18  10    9.02    9.40
   3 -18  -9   -3.27    9.14
  -3 -18   9   14.10    6.88
  -3 -18   9    5.31    7.67
  -3  18   9   11.53   10.30
   3 -18  -8   87.84   11.73
  -3 -18   8   82.98    9.53
  -3 -18   8   65.75    8.85
  -3  18   8   96.58   12.63
   3 -18  -7   55.29   11.35
  -3 -18   7   44.08    8.68
  -3 -18   7   45.90    8.48
  -3  18   7   47.78   11.31
   3 -18  -6  399.60   23.52
  -3 -18   6  376.10   21.49
  -3 -18   6  357.30   20.92
  -3  18   6  425.00   24.83
   3 -18  -5    5.70    9.96
  -3 -18   5   10.98    9.33
  -3 -18   5   11.51    7.91
  -3  18   5   -0.39   10.37
   3 -18  -4   89.94   12.27
  -3 -18   4  101.20   11.57
  -3 -18   4  101.70   10.96
  -3  18   4  143.70   13.90
   3 -18  -3   68.65   11.16
  -3 -18   3   62.76    9.91
  -3 -18   3   70.41    9.74
  -3  18   3   91.93   13.76
   3 -18  -2   85.70   12.19
  -3 -18   2   79.92   10.65
  -3 -18   2   67.31   10.48
  -3  18   2   86.91   13.31
   3 -18  -1   96.73   12.09
  -3 -18   1   75.99    9.90
  -3 -18   1   74.46   10.57
   3  18  -1   72.16   11.46
  -3  18   1   79.10   13.53
   3 -18   0   53.49   11.19
  -3 -18   0   79.83   10.68
   3  18   0   66.83   11.39
  -3  18   0   56.40   12.06
   3 -18   1   11.80    8.92
  -3 -18  -1    9.24    9.55
   3  18   1   17.31   10.58
  -3  18  -1   -1.75   10.10
   3 -18   2  518.20   28.86
   3 -18   2  520.60   28.83
  -3 -18  -2  472.30   26.35
   3  18   2  522.70   28.90
  -3  18  -2  510.10   28.46
   3 -18   3  119.80   11.96
   3 -18   3  127.70   12.57
  -3 -18  -3  105.50   12.43
   3  18   3  124.20   12.09
   3 -18   4   85.52   10.52
   3 -18   4   81.16   10.66
  -3 -18  -4   95.43   12.09
   3  18   4   86.48   10.67
   3 -18   5   14.98    8.15
   3 -18   5   31.89    9.09
  -3 -18  -5   17.98   10.67
   3  18   5   22.20    9.59
   3 -18   6   32.24    8.78
   3 -18   6   21.65    7.51
  -3 -18  -6    6.44   10.27
   3  18   6   34.05    9.29
   3 -18   7   11.04    8.28
   3 -18   7    2.97    8.12
  -3 -18  -7    5.63   10.36
   3  18   7    3.78    8.99
   3 -18   8  293.10   17.45
   3 -18   8  340.00   19.87
  -3 -18  -8  330.40   20.81
   3  18   8  318.70   19.84
   3 -18   9    1.01    6.66
   3 -18   9    8.93    7.44
  -3 -18  -9    4.55   10.31
   3  18   9   -4.66    9.28
   3 -18  10   -3.29    6.76
   3 -18  10  -13.57    6.60
  -3 -18 -10    8.30   11.32
   3  18  10   15.01    9.57
   3 -18  11    2.49    6.00
   3 -18  11    3.26    7.12
  -3 -18 -11   -2.09    8.66
   3  18  11   -8.42    9.65
   3 -19 -12   -1.87    8.52
  -3 -19  12    0.86    6.22
  -3 -19  12    3.81    6.18
  -3  19  12   -3.53    7.97
   3 -19 -11   28.13   10.91
  -3 -19  11   52.42    7.82
  -3 -19  11   43.03    7.54
  -3  19  11   29.30    9.63
   3 -19 -10    7.81    9.34
  -3 -19  10   18.95    7.34
  -3 -19  10    6.04    7.05
  -3  19  10    5.18    8.93
   3 -19  -9    0.45    9.89
  -3 -19   9    6.49    7.62
  -3 -19   9   16.84    6.91
  -3  19   9   -0.35   10.25
   3 -19  -8   47.20   11.25
  -3 -19   8   37.37    8.85
  -3 -19   8   61.06    9.03
  -3  19   8   63.85   11.52
   3 -19  -7  101.00   11.80
  -3 -19   7   92.60   10.22
  -3 -19   7   98.41    9.83
  -3  19   7  109.00   12.64
   3 -19  -6  113.20   12.25
  -3 -19   6  120.80   10.76
  -3 -19   6  127.10   11.85
  -3  19   6  121.00   12.46
   3 -19  -5    2.44    8.73
  -3 -19   5   13.84    9.36
  -3 -19   5    3.96    8.05
  -3  19   5    0.72   10.43
   3 -19  -4   13.70   10.76
  -3 -19   4    4.69    8.91
  -3 -19   4    8.67    9.31
  -3  19   4   -1.39   10.06
   3 -19  -3   81.59   11.78
  -3 -19   3   76.15    9.89
  -3 -19   3   65.87   10.55
  -3  19   3  101.10   13.06
   3 -19  -2  102.80   12.40
  -3 -19   2  110.20   11.15
  -3 -19   2  123.50   11.56
  -3  19   2  109.80   12.81
   3 -19  -1   26.40    9.79
  -3 -19   1   52.84   10.03
  -3 -19   1   46.89    9.47
   3  19  -1   31.32   10.49
  -3  19   1   49.75   11.37
   3 -19   0    0.58    9.29
  -3 -19   0   -0.79    9.06
   3  19   0   13.66   10.25
  -3  19   0    7.12   11.38
   3 -19   1  323.50   19.94
  -3 -19  -1  333.00   20.77
   3  19   1  306.70   18.88
  -3  19  -1  352.50   21.73
   3 -19   2  101.20   11.73
  -3 -19  -2   72.40   10.72
   3  19   2  117.90   11.94
  -3  19  -2  122.30   12.48
   3 -19   3   71.89   10.35
   3 -19   3   76.64   10.65
  -3 -19  -3   90.35   11.44
   3  19   3   85.37   11.36
   3 -19   4    9.82    8.78
   3 -19   4   14.11    8.13
  -3 -19  -4    2.91    8.95
   3  19   4   11.28   10.24
   3 -19   5   40.37    8.70
   3 -19   5   49.02    9.28
  -3 -19  -5   19.19   10.51
   3  19   5   32.82   10.49
   3 -19   6   80.42    9.34
   3 -19   6  115.10   11.23
  -3 -19  -6   91.47   11.97
   3  19   6   77.01   10.55
   3 -19   7   92.75   10.03
   3 -19   7  109.80   10.77
  -3 -19  -7   84.82   11.88
   3  19   7   80.69   10.64
   3 -19   8   -4.68    8.10
   3 -19   8    5.90    7.75
  -3 -19  -8   17.07   10.25
   3  19   8    5.64    9.27
   3 -19   9   41.58    8.43
   3 -19   9   38.74    7.26
  -3 -19  -9   18.62   11.38
   3  19   9   36.62   10.28
   3 -19  10   19.33    6.18
   3 -19  10    5.16    6.38
  -3 -19 -10    2.13    9.92
   3  19  10   13.31    9.06
   3 -20 -12   10.78    8.21
  -3 -20  12   17.91    5.55
  -3 -20  12    8.75    6.95
  -3  20  12    7.34    9.91
   3 -20 -11    0.86    8.14
  -3 -20  11   13.97    6.94
  -3 -20  11   11.79    7.11
  -3  20  11    6.90    8.95
   3 -20 -10   -4.38    9.93
  -3 -20  10    0.84    6.56
  -3 -20  10    5.73    7.15
  -3  20  10    0.78    9.46
   3 -20  -9   -9.12    9.69
  -3 -20   9    2.98    7.15
  -3 -20   9    2.56    7.02
  -3  20   9  -13.96    9.71
   3 -20  -8  126.00   12.75
  -3 -20   8  145.60   11.41
  -3 -20   8  140.80   11.77
  -3  20   8  136.20   13.39
   3 -20  -7   32.42   11.05
  -3 -20   7   47.20    8.65
  -3 -20   7   39.46    8.04
  -3  20   7   31.14   10.09
   3 -20  -6  106.70   12.10
  -3 -20   6  107.10   10.09
  -3 -20   6  136.70   12.78
  -3  20   6   97.14   11.43
   3 -20  -5   64.05   11.18
  -3 -20   5   83.93   10.94
  -3 -20   5   62.78    9.00
  -3  20   5   86.90   11.89
   3 -20  -4   25.50   10.79
  -3 -20   4  -10.29    9.85
  -3 -20   4   17.51    9.10
  -3  20   4   -8.26   10.78
   3 -20  -3   36.02   10.55
  -3 -20   3   36.79    8.82
  -3 -20   3   41.50   10.72
  -3  20   3   31.03   11.75
   3 -20  -2   38.63   11.04
  -3 -20   2    7.88    9.26
  -3 -20   2   41.76    9.54
  -3  20   2   23.35   11.43
   3 -20  -1  421.80   24.30
  -3 -20   1  405.10   23.34
  -3 -20   1  387.90   22.43
   3  20  -1  473.00   27.08
  -3  20   1  388.10   23.38
   3 -20   0  301.50   18.98
  -3 -20   0  319.50   19.79
   3  20   0  323.80   20.59
  -3  20   0  296.60   19.51
   3 -20   1  106.90   11.45
  -3 -20  -1   90.35   12.59
   3  20   1   96.74   10.53
  -3  20  -1  105.80   12.53
   3 -20   2   74.86   11.33
   3 -20   2   94.94   11.17
  -3 -20  -2   58.94   10.31
   3  20   2   80.24   10.85
  -3  20  -2   76.18   11.66
   3 -20   3   54.65   10.15
   3 -20   3   56.41    9.73
  -3 -20  -3   53.74   11.75
   3  20   3   60.60   10.84
   3 -20   4   36.30    9.08
   3 -20   4   57.33   10.05
  -3 -20  -4   40.05   10.31
   3  20   4   26.53   10.47
   3 -20   5  -12.19    8.66
   3 -20   5   17.46    8.54
  -3 -20  -5   12.11   10.63
   3  20   5   -4.24    9.16
   3 -20   6  101.70   10.47
   3 -20   6  110.60   10.62
  -3 -20  -6   85.58   11.62
   3  20   6  101.20   10.56
   3 -20   7    2.27    7.84
   3 -20   7    6.78    8.26
  -3 -20  -7   21.19   10.63
   3  20   7   17.00    9.41
   3 -20   8   58.03   10.09
   3 -20   8   71.36    8.47
  -3 -20  -8   65.26   11.25
   3  20   8   88.08   10.72
   3 -20   9    5.91    7.63
   3 -20   9    1.76    7.96
  -3 -20  -9   -8.43   11.20
   3  20   9  -11.47    9.11
   3 -20  10    4.77    6.39
   3 -20  10    9.22    7.11
  -3 -20 -10    3.48    9.42
   3  20  10  -22.04    9.11
   3 -21 -12   20.64    8.15
  -3 -21  12   20.23    6.88
  -3 -21  12   14.40    5.26
  -3  21  12   27.54   10.75
   3 -21 -11    6.17    8.37
  -3 -21  11    6.27    6.88
  -3 -21  11   14.55    6.51
  -3  21  11    2.57    8.65
   3 -21 -10    3.42   10.01
  -3 -21  10    4.78    6.03
  -3 -21  10    2.87    7.41
  -3  21  10   10.32   10.15
   3 -21  -9   24.13   10.12
  -3 -21   9   26.23    7.21
  -3 -21   9    3.16    7.27
  -3  21   9   20.72    9.45
   3 -21  -8   17.95   10.27
  -3 -21   8   19.60    7.90
  -3 -21   8    1.50    6.94
  -3  21   8   16.80    9.42
   3 -21  -7   29.99    9.89
  -3 -21   7   32.13    8.46
  -3 -21   7   17.70    8.63
  -3  21   7   24.07   10.08
   3 -21  -6    2.41    9.74
  -3 -21   6    0.76    7.46
  -3 -21   6   -1.33    8.29
  -3  21   6    2.75    9.20
   3 -21  -5   72.32   11.12
  -3 -21   5   77.66   10.71
  -3 -21   5   50.68    8.82
  -3  21   5   78.39   11.03
   3 -21  -4  363.70   21.71
  -3 -21   4  356.00   21.48
  -3 -21   4  334.10   20.08
  -3  21   4  350.30   21.29
   3 -21  -3   36.69    9.81
  -3 -21   3   22.96    8.59
  -3 -21   3   32.18    9.78
  -3  21   3   36.64   11.63
   3 -21  -2  241.40   16.97
  -3 -21   2  219.70   14.98
  -3 -21   2  240.40   16.21
  -3  21   2  272.30   19.14
   3 -21  -1   21.47    9.63
  -3 -21   1   26.66    9.28
  -3 -21   1   10.62    9.95
   3  21  -1   24.54    9.69
  -3  21   1    6.86   10.82
   3 -21   0  103.50   11.37
  -3 -21   0  121.30   11.58
   3  21   0  102.90   11.84
  -3  21   0  118.90   14.03
   3 -21   1   27.84    9.63
  -3 -21  -1   35.96   10.45
   3  21   1   26.76    9.24
  -3  21  -1   42.70   10.26
   3 -21   2  294.30   18.85
   3 -21   2  285.90   18.16
  -3 -21  -2  276.30   17.81
   3  21   2  271.30   17.49
  -3  21  -2  266.60   17.71
   3 -21   3   22.83    9.03
   3 -21   3    6.42    9.07
  -3 -21  -3   37.48   10.98
   3  21   3   26.94    9.94
   3 -21   4   31.32    9.16
   3 -21   4   32.28    9.24
  -3 -21  -4   10.10    9.56
   3  21   4   32.74   10.75
   3 -21   5   62.89    9.96
   3 -21   5   55.82    9.52
  -3 -21  -5   66.71   11.28
   3  21   5   64.43   10.42
   3 -21   6   22.37    8.53
   3 -21   6   24.19    8.31
  -3 -21  -6   35.07   11.19
   3  21   6   11.38    9.58
   3 -21   7   13.01    7.97
   3 -21   7   -6.20    8.17
  -3 -21  -7   15.13   10.38
   3  21   7  -11.86    9.49
   3 -21   8  -12.44    7.14
   3 -21   8   -4.28    7.91
  -3 -21  -8   16.60   10.53
   3  21   8  -16.75    8.99
   3 -21   9   48.32    7.65
   3 -21   9   48.15    7.64
  -3 -21  -9   32.36   11.12
   3  21   9   40.01    9.62
   3 -21  10   11.84    6.72
   3 -21  10    9.66    6.26
  -3 -21 -10   11.63    9.55
   3  21  10   -0.68   11.11
   3 -22 -11   35.91    8.68
  -3 -22  11   32.08    6.84
  -3 -22  11   38.50    6.85
  -3  22  11   34.73    8.94
   3 -22 -10   -1.28    9.08
  -3 -22  10   -0.43    7.14
  -3 -22  10    2.00    6.33
  -3  22  10   -1.28    9.43
   3 -22  -9    6.79   10.09
  -3 -22   9   26.93    7.34
  -3 -22   9   23.01    6.85
  -3  22   9   12.16    8.33
   3 -22  -8   64.87   10.96
  -3 -22   8   62.59    9.06
  -3 -22   8   72.26    8.99
  -3  22   8   52.93    9.24
   3 -22  -7   27.73   10.02
  -3 -22   7   21.15    8.64
  -3 -22   7   23.36    7.85
  -3  22   7   22.13    9.93
   3 -22  -6   94.80   10.80
  -3 -22   6   76.02    9.08
  -3 -22   6   90.72   10.71
  -3  22   6  109.60   11.59
   3 -22  -5   35.14   10.37
  -3 -22   5   40.92   10.22
  -3 -22   5   29.91    8.35
  -3  22   5   23.12    9.86
   3 -22  -4    0.89    8.87
  -3 -22   4  -10.30    9.39
  -3 -22   4  -10.54    8.18
  -3  22   4  -26.88    9.96
   3 -22  -3   95.90   10.94
  -3 -22   3  118.80   12.04
  -3 -22   3  111.60   10.69
  -3  22   3  117.50   12.27
   3 -22  -2    0.72   10.02
  -3 -22   2   17.90    8.41
  -3 -22   2    4.97    9.57
  -3  22   2   33.91   11.34
   3 -22  -1  214.60   15.08
  -3 -22   1  214.10   15.44
  -3 -22   1  235.00   15.79
   3  22  -1  219.90   15.52
  -3  22   1  229.80   16.87
   3 -22   0   42.49    9.58
  -3 -22   0   48.41    9.59
   3  22   0   40.37    9.25
  -3  22   0   41.03   11.25
   3 -22   1    6.35    8.19
   3 -22   1  -11.92    8.86
  -3 -22  -1   15.12   10.77
   3  22   1   -7.50    9.49
  -3  22  -1  -13.30   10.21
   3 -22   2   14.56    9.11
   3 -22   2    8.93    7.55
  -3 -22  -2   14.21    9.26
   3  22   2   26.09    9.70
  -3  22  -2   16.97    8.38
   3 -22   3   80.57    9.74
   3 -22   3   65.43   10.07
  -3 -22  -3   88.21   12.37
   3  22   3   75.46   11.52
   3 -22   4   94.22   11.01
   3 -22   4  100.70   10.94
  -3 -22  -4   93.45   11.61
   3  22   4  119.00   12.30
   3 -22   5    8.18    9.14
   3 -22   5    4.30    8.55
  -3 -22  -5   17.29    9.69
   3  22   5   -9.62    9.41
   3 -22   6   -0.23    8.30
   3 -22   6   19.95    8.55
  -3 -22  -6    8.89    9.91
   3  22   6    5.40    9.80
   3 -22   7   42.29    8.29
   3 -22   7   39.89    8.05
  -3 -22  -7   25.92    9.81
   3  22   7   10.92   10.20
   3 -22   8   75.04    8.00
   3 -22   8   90.69    9.58
  -3 -22  -8   78.61   12.65
   3  22   8   89.59   11.36
   3 -22   9   -2.53    6.84
   3 -22   9   -0.74    7.47
  -3 -22  -9   -8.72   10.54
   3  22   9    8.00    9.38
   3 -23 -11    8.56    7.16
  -3 -23  11   15.44    6.09
  -3  23  11    9.41   11.38
   3 -23 -10   11.69    8.81
  -3 -23  10   20.82    7.06
  -3 -23  10   16.82    6.65
  -3  23  10    3.62    8.63
   3 -23  -9   -9.09    9.77
  -3 -23   9    3.19    7.44
  -3 -23   9    5.45    7.32
  -3  23   9   -6.24    8.40
   3 -23  -8  151.30   13.98
  -3 -23   8  185.80   13.08
  -3 -23   8  160.20   11.90
  -3  23   8  174.40   12.99
   3 -23  -7   28.09   10.27
  -3 -23   7   43.09    7.79
  -3 -23   7   29.84    8.64
  -3  23   7   23.44    9.94
   3 -23  -6   84.13   10.62
  -3 -23   6   71.45    8.93
  -3 -23   6   89.24   10.20
  -3  23   6   66.48   10.37
   3 -23  -5   30.61   10.55
  -3 -23   5   29.11   10.33
  -3 -23   5   24.43    8.23
  -3  23   5   40.71    9.86
   3 -23  -4   27.69   10.35
  -3 -23   4   53.45    9.68
  -3 -23   4   26.90    8.45
  -3  23   4   23.10    9.68
   3 -23  -3   48.38   10.32
  -3 -23   3   53.69    9.89
  -3 -23   3   58.43    8.97
  -3  23   3   53.28   10.49
   3 -23  -2  -12.95    9.11
  -3 -23   2    2.88    8.50
  -3 -23   2   -2.88    8.52
  -3  23   2   17.77   10.73
   3 -23  -1   89.90   10.73
  -3 -23   1   94.05   10.97
  -3 -23   1   97.78   10.74
   3  23  -1   82.48   10.01
  -3  23   1   80.73   11.79
   3 -23   0  133.80   12.10
  -3 -23   0  124.10   13.55
   3  23   0  132.40   11.61
  -3  23   0  102.80   12.66
   3 -23   1   15.56    9.09
   3 -23   1    4.37    8.46
  -3 -23  -1   -8.08   10.08
   3  23   1    7.29    9.27
  -3  23  -1   -0.44    8.95
   3 -23   2    8.29    8.11
   3 -23   2    7.66    8.41
  -3 -23  -2   13.23   10.02
   3  23   2    5.67    8.91
  -3  23  -2    9.70    8.83
   3 -23   3   82.37   10.49
   3 -23   3   81.26    9.56
  -3 -23  -3   99.72   12.73
   3  23   3   83.46   11.26
   3 -23   4   70.26    9.60
   3 -23   4   67.81    9.33
  -3 -23  -4   79.72   11.04
   3  23   4   65.93   10.01
   3 -23   5   18.69    8.21
   3 -23   5   11.92    8.69
  -3 -23  -5    4.86   11.32
   3  23   5   24.98   10.65
   3 -23   6  154.00   11.66
   3 -23   6  168.40   12.97
  -3 -23  -6  163.70   13.91
   3  23   6  155.50   13.33
   3 -23   7   15.21    7.53
   3 -23   7   18.64    7.23
  -3 -23  -7   12.55   10.10
   3  23   7   23.80    9.35
   3 -23   8   11.26    7.50
   3 -23   8    9.85    7.24
  -3 -23  -8   -2.59    9.19
   3  23   8   23.11    9.23
   3 -23   9   11.39    6.39
   3 -23   9   20.46    6.99
  -3 -23  -9   -3.50    9.29
   3  23   9    9.16    9.17
   3 -24 -10    3.62    7.54
  -3 -24  10   12.45    7.11
  -3 -24  10    3.49    6.41
  -3  24  10    2.29    8.23
   3 -24  -9    5.77    9.27
  -3 -24   9    7.21    7.19
  -3 -24   9   17.87    7.71
  -3  24   9   -4.69    8.30
   3 -24  -8   27.33   10.54
  -3 -24   8   37.79    8.02
  -3 -24   8   56.26    8.61
  -3  24   8   38.16    9.38
   3 -24  -7  129.20   11.93
  -3 -24   7  116.60   10.37
  -3 -24   7  118.20   10.14
  -3  24   7  130.10   12.20
   3 -24  -6    9.22    9.90
  -3 -24   6   20.98    8.93
  -3 -24   6   13.82    7.52
  -3  24   6   14.92    9.45
   3 -24  -5  123.30   12.63
  -3 -24   5  107.70   10.27
  -3 -24   5  111.90   12.12
  -3  24   5  137.70   13.06
   3 -24  -4    6.10   10.20
  -3 -24   4   19.47    9.28
  -3 -24   4  -13.02    8.27
  -3  24   4    8.06    9.58
   3 -24  -3   21.33    9.43
  -3 -24   3    5.55    7.80
  -3 -24   3   -0.37    9.25
  -3  24   3    6.60    9.54
   3 -24  -2   83.63   11.52
  -3 -24   2   86.95   10.31
  -3 -24   2   74.10    9.72
  -3  24   2   81.87   11.38
   3 -24  -1   -4.56   10.12
  -3 -24   1   -3.56    8.47
  -3 -24   1  -13.22    8.87
   3  24  -1    8.08    8.91
  -3  24   1   -8.43   10.15
   3 -24   0   67.56    9.89
  -3 -24   0   77.16   12.18
   3  24   0   68.87   10.30
  -3  24   0   73.56   12.26
   3 -24   1  232.20   15.51
   3 -24   1  211.80   14.05
  -3 -24  -1  247.50   17.13
   3  24   1  244.70   17.28
  -3  24  -1  206.10   15.61
   3 -24   2    8.29    8.37
   3 -24   2    9.02    8.41
  -3 -24  -2   10.37    9.33
   3  24   2   24.64    9.50
   3 -24   3  200.80   14.05
  -3 -24  -3  254.90   18.27
   3  24   3  197.80   14.28
   3 -24   4   -3.74    7.56
   3 -24   4   10.03    7.94
  -3 -24  -4    2.62    9.71
   3  24   4    1.21    9.69
   3 -24   5   -7.49    7.74
   3 -24   5    5.43    9.12
  -3 -24  -5  -13.24   10.40
   3  24   5   -4.94    9.89
   3 -24   6  107.00   10.53
   3 -24   6   92.86    9.85
  -3 -24  -6   97.94   12.51
   3  24   6  112.60   11.97
   3 -24   7   24.17    7.95
   3 -24   7   44.06    8.02
  -3 -24  -7   18.05    9.96
   3  24   7   19.31    9.79
   3 -24   8   15.67    6.98
   3 -24   8    8.55    6.59
  -3 -24  -8   15.33    9.19
   3  24   8   12.81    8.32
   3 -24   9   12.81    6.92
   3 -24   9    6.22    6.02
   3  24   9   10.05    8.55
   3 -25 -10   12.46    7.39
  -3 -25  10    8.48    8.17
  -3 -25  10   13.10    6.61
  -3  25  10   11.84   10.18
   3 -25  -9   10.23    8.68
  -3 -25   9   14.68    6.94
  -3 -25   9   27.19    7.57
  -3  25   9   18.93    7.78
   3 -25  -8   18.07    9.79
  -3 -25   8   29.50    7.76
  -3 -25   8   31.27    8.14
  -3  25   8   17.49    8.74
   3 -25  -7   14.16   10.03
  -3 -25   7    7.66    7.26
  -3 -25   7  -11.70    8.19
  -3  25   7   16.87    9.89
   3 -25  -6   -2.70    9.33
  -3 -25   6   10.56    7.59
  -3 -25   6   11.23    9.62
  -3  25   6    8.94    9.53
   3 -25  -5    7.85    9.86
  -3 -25   5    0.33    7.39
  -3 -25   5   -6.95    9.14
  -3  25   5   13.40    9.78
   3 -25  -4  241.90   17.15
  -3 -25   4  223.10   14.80
  -3 -25   4  206.60   14.90
  -3  25   4  197.90   14.58
   3 -25  -3  164.90   12.71
  -3 -25   3  168.40   12.60
  -3 -25   3  187.10   14.60
  -3  25   3  179.00   14.14
   3 -25  -2    4.54    9.32
  -3 -25   2   -3.92    9.22
  -3 -25   2  -11.79    8.31
  -3  25   2    5.66    9.22
   3 -25  -1   33.88    9.27
  -3 -25   1   44.17    9.36
  -3 -25   1   57.52    9.72
   3  25  -1   39.63    9.14
  -3  25   1   28.83   10.43
   3 -25   0  179.30   13.58
  -3 -25   0  167.70   13.08
   3  25   0  229.70   15.88
  -3  25   0  215.20   16.42
   3 -25   1   39.13    8.07
   3 -25   1   66.06   10.59
  -3 -25  -1   37.82   11.01
   3  25   1   51.51   10.46
  -3  25  -1   51.24   10.45
   3 -25   2   66.37    9.53
   3 -25   2   55.93    9.34
  -3 -25  -2   50.55   10.28
   3  25   2   48.95    9.34
   3 -25   3   16.31    7.84
   3 -25   3    2.53    6.94
  -3 -25  -3    6.96   10.83
   3  25   3    3.07    9.05
   3 -25   4    6.84    8.10
   3 -25   4   -1.18    7.99
  -3 -25  -4   18.25    9.58
   3  25   4   14.30    9.62
   3 -25   5   43.92    8.67
   3 -25   5   57.91    9.56
  -3 -25  -5   43.04   10.88
   3  25   5   33.62    9.54
   3 -25   6   59.20    9.19
   3 -25   6   61.82    8.94
  -3 -25  -6   47.32   10.86
   3  25   6   54.35    9.68
   3 -25   7   23.46    7.61
   3 -25   7   17.39    6.67
  -3 -25  -7   26.22    9.43
   3  25   7   22.93    9.61
   3 -25   8    7.79    7.45
   3 -25   8   15.59    6.44
  -3 -25  -8    1.30    9.56
   3  25   8   18.81    7.87
   3 -26  -9    0.79    7.83
  -3 -26   9    9.73    7.76
  -3 -26   9    6.78    6.86
  -3  26   9   -8.57    7.61
   3 -26  -8   10.14    8.46
  -3 -26   8   32.31    7.48
  -3 -26   8   27.38    7.24
  -3  26   8   29.30    8.20
   3 -26  -7   -0.29    9.52
  -3 -26   7   13.21    8.07
  -3 -26   7   34.25    7.69
  -3  26   7   16.32    9.26
   3 -26  -6  -15.06    9.30
  -3 -26   6   -3.45    9.58
  -3 -26   6    5.33    7.68
  -3  26   6   -9.96    9.71
   3 -26  -5    0.29    9.51
  -3 -26   5    8.28    7.46
  -3 -26   5    1.11    8.76
  -3  26   5    7.91    9.69
   3 -26  -4    5.48   10.04
  -3 -26   4    8.77    8.82
  -3 -26   4   10.45    8.23
  -3  26   4   10.74    9.37
   3 -26  -3  213.40   14.57
  -3 -26   3  220.80   14.84
  -3 -26   3  221.80   14.37
  -3  26   3  211.80   15.43
   3 -26  -2  178.90   13.94
  -3 -26   2  161.70   12.71
  -3 -26   2  178.10   13.08
  -3  26   2  156.00   13.14
   3 -26  -1  230.00   16.17
  -3 -26   1  195.00   13.69
  -3 -26   1  207.70   14.71
   3  26  -1  205.50   14.64
  -3  26   1  238.00   16.90
   3 -26   0   16.69    8.76
  -3 -26   0   34.08    8.42
  -3 -26   0   23.99    9.64
   3  26   0   23.41    9.11
  -3  26   0   15.84   10.11
   3 -26   1   15.51    9.25
   3 -26   1    7.37    8.07
  -3 -26  -1   -6.76    9.57
   3  26   1   15.04    8.59
  -3  26  -1  -11.37    8.56
   3 -26   2   -8.80    8.99
   3 -26   2   -2.60    7.81
  -3 -26  -2    9.70    9.89
   3  26   2   12.85    8.90
   3 -26   3   32.62    9.37
   3 -26   3   47.14    8.45
  -3 -26  -3   52.11   10.93
   3  26   3   27.91    9.34
   3 -26   4    1.88    9.10
   3 -26   4   -2.39    7.56
  -3 -26  -4    8.82    9.71
   3  26   4  -12.48    8.85
   3 -26   5   -1.79    8.28
   3 -26   5   14.51    7.17
  -3 -26  -5   11.28   10.93
   3  26   5   -3.07    9.39
   3 -26   6   62.53    8.23
   3 -26   6   67.26    7.77
  -3 -26  -6   57.06   10.73
   3  26   6   56.63    9.79
   3 -26   7    3.93    7.58
   3 -26   7    9.28    6.56
  -3 -26  -7   -2.43    8.81
   3  26   7    0.12    8.89
   3 -26   8    6.57    6.32
   3  26   8    4.43    8.96
   3 -27  -9   14.83    7.34
  -3 -27   9   14.76    6.94
  -3 -27   9   24.25   10.53
  -3  27   9   25.70    7.86
   3 -27  -8   -8.78    7.55
  -3 -27   8   -9.34    7.16
  -3 -27   8   -1.37    7.33
  -3  27   8   12.21    7.44
   3 -27  -7    0.78    8.82
  -3 -27   7   -3.16    7.51
  -3 -27   7   -4.15    6.76
  -3  27   7    4.80    8.54
   3 -27  -6   22.07    8.85
  -3 -27   6   14.39    8.74
  -3 -27   6   13.51    7.89
  -3  27   6   -3.91    9.31
   3 -27  -5    4.01    9.39
  -3 -27   5    2.02    8.91
  -3 -27   5    0.36    7.73
  -3  27   5   -7.15    9.30
   3 -27  -4  100.50   12.15
  -3 -27   4   77.28    9.74
  -3 -27   4   75.72   10.04
  -3  27   4   85.16   12.00
   3 -27  -3  102.20   10.07
  -3 -27   3  109.00   10.25
  -3 -27   3  121.10   11.23
  -3  27   3  105.50   12.14
   3 -27  -2   12.92    8.82
  -3 -27   2   14.41    8.63
  -3 -27   2    5.99    8.23
  -3  27   2   -5.09    9.58
   3 -27  -1  115.30   11.41
  -3 -27   1  129.30   11.71
  -3 -27   1  124.70   10.76
  -3  27   1   92.70   11.43
   3 -27   0   92.84   10.12
  -3 -27   0   70.81   10.21
  -3 -27   0   98.97   10.22
   3  27   0   90.77   10.02
  -3  27   0   87.08   10.79
   3 -27   1    2.62    7.22
   3 -27   1   -9.78    7.68
  -3 -27  -1   14.41    9.44
   3  27   1   14.08    9.07
  -3  27  -1    2.64    7.28
   3 -27   2   64.59    9.23
   3 -27   2   58.79    8.69
  -3 -27  -2   78.29   11.35
   3  27   2   80.88   10.85
   3 -27   3    7.99    7.83
   3 -27   3   12.70    7.71
  -3 -27  -3   21.48   10.81
   3  27   3   12.86    8.21
   3 -27   4    0.37    7.41
   3 -27   4   -3.01    8.05
  -3 -27  -4   -6.12    9.05
   3  27   4   23.65    9.25
   3 -27   5   33.40    7.52
   3 -27   5   34.50    7.87
  -3 -27  -5    7.38   10.45
   3  27   5   49.79    9.97
   3 -27   6    2.44    7.08
   3 -27   6   12.93    6.40
  -3 -27  -6   -4.91    8.95
   3  27   6   -0.62    8.48
   3 -27   7   10.64    6.33
   3 -27   7   -7.73    6.86
  -3 -27  -7   -2.60    8.80
   3  27   7   -4.02    8.78
   3 -28  -8    0.30    6.70
  -3 -28   8   11.30    9.07
  -3 -28   8    6.14    6.52
  -3  28   8   -8.89    8.37
   3 -28  -7    0.71    8.29
  -3 -28   7    2.41    7.00
  -3 -28   7    3.23    7.12
  -3  28   7   10.95    8.02
   3 -28  -6   -3.21    7.76
  -3 -28   6   -5.01    7.38
  -3 -28   6    4.59    7.71
  -3  28   6  -14.61    8.23
   3 -28  -5   11.93    7.76
  -3 -28   5    4.27    7.63
  -3 -28   5   -4.93    8.01
  -3  28   5    7.72    8.74
   3 -28  -4   20.04   10.15
  -3 -28   4   18.75    8.23
  -3 -28   4   14.54    9.08
  -3  28   4   45.75    9.91
   3 -28  -3   -5.00    8.09
  -3 -28   3    7.92    8.00
  -3 -28   3    9.93    8.17
  -3  28   3    7.65    8.73
   3 -28  -2  101.80   10.61
  -3 -28   2  109.60   10.56
  -3 -28   2   97.90    9.93
  -3  28   2   76.09   10.10
   3 -28  -1   -5.40    8.50
  -3 -28   1    1.44    8.05
  -3 -28   1   12.81    8.12
  -3  28   1   10.27    8.93
   3 -28   0   31.44    8.47
   3 -28   0   16.21    9.30
  -3 -28   0   30.39    9.53
  -3 -28   0   33.06    8.24
   3  28   0   21.73    8.42
  -3  28   0   44.76    8.71
   3 -28   1   12.00    8.16
   3 -28   1   -0.64    7.26
  -3 -28  -1  -11.38    9.26
   3  28   1   -5.38    8.97
  -3  28  -1   -5.93    8.21
   3 -28   2    4.40    7.84
   3 -28   2   15.81    8.05
  -3 -28  -2   21.75   10.71
   3  28   2   -8.35    9.47
   3 -28   3    8.49    6.63
   3 -28   3   10.47    7.23
  -3 -28  -3    5.38    9.40
   3  28   3   20.71    8.93
   3 -28   4   31.56    8.44
   3 -28   4   34.91    8.58
  -3 -28  -4   17.26    9.54
   3  28   4   16.23    8.94
   3 -28   5   29.64    6.92
   3 -28   5    7.91    7.13
  -3 -28  -5   18.39   10.15
   3  28   5    1.60    9.54
   3 -28   6   -3.27    6.31
   3 -28   6    6.79    5.99
  -3 -28  -6    7.77    8.31
   3  28   6   11.07    8.72
   3 -29  -7    3.09    7.23
  -3 -29   7   10.92    6.67
  -3  29   7   33.93    9.59
   3 -29  -6   10.81    7.22
  -3 -29   6    7.27    7.11
  -3 -29   6    7.27    6.82
  -3  29   6   17.99    8.66
   3 -29  -5   24.89    8.89
  -3 -29   5   10.20    7.84
  -3 -29   5   16.89    7.25
  -3  29   5  -10.43    8.24
   3 -29  -4   17.03    9.20
  -3 -29   4   10.25    8.16
  -3 -29   4   -0.75    8.00
  -3  29   4   12.93    8.41
   3 -29  -3   98.03    9.83
  -3 -29   3   93.11   10.05
  -3 -29   3   94.72    9.72
  -3  29   3  123.80   10.19
   3 -29  -2   16.09    8.66
  -3 -29   2   11.94    7.47
  -3 -29   2    8.72    8.07
  -3  29   2    0.62    7.46
   3 -29  -1   28.04    8.88
  -3 -29   1   27.86    8.13
  -3  29   1   35.99    9.09
   3 -29   0   -7.16    7.80
   3 -29   0   14.25    8.53
  -3 -29   0    3.95    9.15
  -3 -29   0    4.93    7.52
   3  29   0    5.96    8.26
  -3  29   0    5.61    8.53
   3 -29   1    3.79    7.59
   3 -29   1  -12.72    7.93
  -3 -29  -1    0.81    8.78
   3  29   1    1.37    8.17
  -3  29  -1   -8.81    8.11
   3 -29   2    3.13    7.26
   3 -29   2    6.22    7.05
  -3 -29  -2    0.42    9.76
   3  29   2   -3.92    8.74
   3 -29   3    7.51    7.37
   3 -29   3    3.69    7.04
  -3 -29  -3   -8.30    9.34
   3  29   3   13.06    9.15
   3 -29   4   42.14    7.16
   3 -29   4   28.73    7.33
  -3 -29  -4   27.17    9.49
   3  29   4   17.24    8.80
   3 -29   5   46.31    8.07
   3 -29   5   48.49    7.20
  -3 -29  -5   29.47    8.58
   3  29   5   36.64    9.14
   3 -30  -6   46.63    7.49
  -3 -30   6   27.67    7.28
  -3 -30   6   40.57    7.01
  -3  30   6   33.49    9.31
   3 -30  -5   13.08    7.09
  -3 -30   5  -10.07    6.42
  -3 -30   5    6.78    7.72
  -3  30   5    7.81    8.99
   3 -30  -4   50.07    9.75
  -3 -30   4   77.66    8.91
  -3 -30   4   74.65    8.75
  -3  30   4   64.97    9.14
   3 -30  -3    2.50    7.13
  -3 -30   3    6.83    7.92
  -3 -30   3    4.33    7.24
  -3  30   3   12.90    8.43
   3 -30  -2   33.48    9.12
  -3 -30   2   53.52    9.24
  -3 -30   2   30.91    7.60
  -3  30   2   40.07    8.33
   3 -30  -1   -7.83    8.15
  -3 -30   1  -11.32    7.57
  -3 -30   1    3.05    8.93
  -3  30   1   -0.26    8.06
   3 -30   0    9.39    8.42
   3 -30   0   13.27    7.87
  -3 -30   0    5.83    7.25
  -3 -30   0   25.92    9.34
   3  30   0    6.66    8.07
  -3  30   0   12.24    8.44
   3 -30   1   35.19    8.59
   3 -30   1   19.46    7.87
  -3 -30  -1   36.13    9.11
  -3 -30  -1   31.13    8.00
   3  30   1   30.27    8.73
  -3  30  -1   20.77    7.23
   3 -30   2    6.38    7.62
   3 -30   2  -13.35    7.23
  -3 -30  -2    9.83   10.48
   3  30   2  -11.66    8.92
   3 -30   3   38.84    7.26
   3 -30   3   31.94    7.97
  -3 -30  -3   30.32    9.11
   3  30   3   34.14    9.85
   3 -30   4   26.19    7.58
   3 -30   4   12.83    6.93
  -3 -30  -4    0.75    7.21
   3  30   4   12.72    7.86
   3 -30   5   -0.95    6.37
   3  30   5    1.33    8.54
   3 -31  -5   12.15    6.09
  -3 -31   5   13.82    6.62
  -3 -31   5   24.62    8.66
  -3  31   5   19.36    8.97
   3 -31  -4   11.97    7.90
  -3 -31   4   12.43    6.74
  -3 -31   4    1.65    7.54
  -3  31   4    8.25    8.19
   3 -31  -3  113.80   10.23
  -3 -31   3  107.70    9.48
  -3 -31   3  122.50   10.19
  -3  31   3   96.45   10.30
   3 -31  -2   17.17    7.39
  -3 -31   2   -5.15    6.62
  -3 -31   2    1.10    6.73
  -3  31   2    1.87    8.42
   3 -31  -1   13.68    7.92
  -3 -31   1   20.24    7.67
  -3 -31   1   15.60    8.83
  -3  31   1   17.82    7.81
   3 -31   0   28.09    8.14
   3 -31   0    6.84    7.31
  -3 -31   0   23.46    9.11
  -3 -31   0   31.57    7.57
   3  31   0   25.83    8.97
  -3  31   0   23.30    6.97
   3 -31   1    7.26    7.40
   3 -31   1    7.97    7.43
  -3 -31  -1   12.95    7.62
  -3 -31  -1    7.35    8.47
   3  31   1    4.59    7.98
   3 -31   2   15.26    7.53
   3 -31   2   15.78    6.47
  -3 -31  -2   20.49    9.19
   3  31   2   12.07    8.03
   3 -31   3   -3.11    7.00
  -3 -31  -3   10.72    6.72
   3  31   3   13.90    7.46
   3 -32  -4   10.41    7.59
  -3 -32   4   -4.87    8.92
  -3 -32   4   14.02    7.49
  -3  32   4   10.28    6.99
   3 -32  -3   -3.45    7.16
  -3 -32   3   11.34    6.83
  -3 -32   3   15.11    9.30
  -3  32   3   20.19    7.03
   3 -32  -1    8.58    7.86
   3 -32  -1   19.14    7.45
  -3 -32   1    8.69    8.07
  -3 -32   1    6.32    6.98
  -3  32   1   -3.24    7.36
   3 -32   0    5.24    6.76
   3 -32   0   -0.54    6.90
  -3 -32   0   11.03    7.90
  -3 -32   0   -8.49    6.94
  -3  32   0    9.33    6.12
   3 -32   1    1.04    6.43
   3 -32   1   -5.45    7.05
  -3 -32  -1   -5.62    7.33
  -3 -32  -1  -16.27    7.01
   3  32   1   -5.72    7.11
   3 -32   2    3.34    7.34
   3 -32   2   -9.71    6.38
  -3 -32  -2    5.67    8.14
   3  32   2    7.95    6.80
   4   0 -14   56.79   10.00
  -4   0  14   65.87    9.94
   4   0 -13   -8.36    8.55
  -4   0  13    4.04    9.35
   4   0 -12    4.68    9.77
  -4   0  12   13.77    9.39
   4   0 -11  -11.24   10.60
  -4   0  11    3.66    9.90
   4   0 -10   20.82    9.36
  -4   0  10    6.48   10.34
   4   0  -8  102.20   10.79
  -4   0   8   97.56   11.82
   4   0  -6  325.90   19.27
  -4   0   6  359.60   21.24
   4   0  -5    0.17    8.36
  -4   0   5    2.51    8.78
   4   0  -4  417.00   22.78
  -4   0   4  420.20   23.07
   4   0  -3   11.59    7.16
  -4   0   3    2.82    7.84
   4   0  -2  270.00   15.19
  -4   0   2  229.80   13.80
   4   0   0  387.60   19.67
   4   0   0  329.10   16.87
   4   0   1   -4.58    4.21
   4   0   1   -2.52    4.79
   4   0   2  122.20    8.88
  -4   0  -2   91.95    7.95
   4   0   4    8.15    6.93
  -4   0  -4   23.63    7.44
   4   0   5   37.31    7.75
  -4   0  -5   11.95    7.63
   4   0   6   21.09    8.33
  -4   0  -6   29.67    8.00
   4   0   7   27.00    8.79
  -4   0  -7    6.39    8.10
   4   0   8   31.87    8.38
  -4   0  -8   43.12    9.00
   4   0   9    4.05    8.62
  -4   0  -9   -0.60    8.43
   4   0  10    8.94    8.41
  -4   0 -10   -4.84    8.45
   4   0  11   -3.76    8.91
  -4   0 -11    9.38    8.15
   4   0  12   23.94    9.01
  -4   0 -12   26.39    8.27
   4   0  13   -9.75    7.65
  -4   0 -13    8.22    6.35
   4  -1 -15   59.84    9.11
  -4  -1  15   80.58    8.98
   4   1 -15   91.15    8.63
  -4   1  15   82.21    9.31
   4  -1 -14   17.34    9.20
  -4  -1  14    0.70    9.49
   4   1 -14   12.11    8.92
  -4   1  14   20.60    9.93
   4   1 -13   -0.65    8.44
  -4   1  13    1.61    9.50
   4  -1 -12    1.30   10.23
  -4  -1  12   26.73    9.32
   4   1 -12   24.25    9.92
  -4   1  12   27.35    9.45
   4  -1 -11   18.22    8.42
  -4  -1  11   -1.59    9.41
   4   1 -11    7.62    9.75
  -4   1  11   10.82   10.33
   4  -1 -10   53.40   10.35
  -4  -1  10   52.15   10.58
   4   1 -10   54.65   11.39
  -4   1  10   48.94   11.06
   4  -1  -9  359.00   21.59
  -4  -1   9  331.80   20.72
   4   1  -9  322.20   19.53
  -4   1   9  339.70   21.27
   4  -1  -8   73.71   10.37
  -4  -1   8   83.94   11.01
   4   1  -8   57.38    8.94
  -4   1   8   64.14   11.19
   4  -1  -7 1077.00   54.74
  -4  -1   7 1116.00   56.77
   4   1  -7 1148.00   58.03
  -4   1   7 1140.00   58.02
   4  -1  -5   29.49    9.18
  -4  -1   5    7.25    9.08
   4   1  -5    9.11    7.68
  -4   1   5   -7.57    9.62
   4  -1  -4   63.26    9.58
  -4  -1   4   92.60    9.66
   4  -1  -3  142.50   10.97
  -4  -1   3  150.10   10.87
   4   1  -3  125.10    9.51
  -4   1   3  131.10   10.55
   4  -1  -2  373.10   20.08
  -4  -1   2  389.70   20.54
   4   1  -2  373.10   19.56
  -4   1   2  378.60   20.53
   4  -1  -1 3202.00  156.60
  -4  -1   1 3598.00  176.10
   4   1  -1 3387.00  165.80
  -4   1   1 3682.00  180.10
   4  -1   0  855.00   42.45
   4  -1   0  874.10   43.38
  -4   1   0  772.40   38.62
   4  -1   1   12.66    4.80
   4  -1   1   25.51    6.26
   4   1   1    4.72    4.00
   4   1   1   -1.07    3.90
   4  -1   2  311.10   17.12
   4  -1   2  334.10   18.18
  -4  -1  -2  273.00   15.29
   4   1   2  246.00   13.78
  -4   1  -2  230.70   13.67
   4  -1   3  417.00   21.89
  -4  -1  -3  424.60   22.50
   4   1   3  463.00   24.02
  -4   1  -3  419.20   22.56
   4  -1   4  225.50   13.88
  -4  -1  -4  228.60   13.77
   4  -1   5  692.20   35.86
  -4  -1  -5  577.90   30.29
   4   1   5  617.40   32.56
  -4   1  -5  520.90   27.90
   4  -1   6   -7.09    7.68
  -4  -1  -6    5.08    7.19
   4   1   6  -10.05    8.27
  -4   1  -6   -3.79    8.06
   4  -1   7  498.00   26.83
  -4  -1  -7  478.70   26.09
   4   1   7  440.30   24.25
  -4   1  -7  421.70   23.58
   4   1   8    5.89    7.90
  -4   1  -8  -12.52    8.21
   4   1   9   72.23   10.19
  -4   1  -9   80.60    9.99
   4  -1  10   -1.31    7.79
  -4  -1 -10    9.02    8.35
   4   1  10   -0.98    8.26
  -4   1 -10    3.01    8.40
   4  -1  11   58.49    9.48
  -4  -1 -11   60.37    9.14
   4   1  11   60.37   10.68
  -4   1 -11   65.55    9.46
   4  -1  12   -3.28    7.80
  -4  -1 -12    4.97    7.63
   4   1  12    4.27    8.56
  -4   1 -12  -17.12    7.54
   4  -1  13   43.51    8.02
  -4  -1 -13   44.28    7.02
   4  -2 -15    5.45    7.97
  -4  -2  15   20.85    7.54
   4  -2 -14   51.76    9.34
  -4  -2  14   30.74    9.73
   4   2 -14   44.63    8.55
  -4   2  14   41.60    9.43
   4  -2 -13    7.42    9.73
  -4  -2  13   10.22    8.34
   4   2 -13   21.92    8.60
  -4   2  13   27.27    9.15
   4  -2 -12   16.36    9.35
  -4  -2  12    4.83    9.00
   4   2 -12   34.26    9.83
  -4   2  12    4.04    9.07
   4  -2 -11   10.47    9.94
  -4  -2  11  -12.70    9.03
   4   2 -11  -18.51    9.46
  -4   2  11   -0.38    9.91
   4  -2 -10    0.78    9.59
  -4  -2  10    0.79    9.72
   4   2 -10   12.75   10.14
  -4   2  10   -7.05   11.02
   4  -2  -8  206.90   15.02
  -4  -2   8  240.30   16.62
   4   2  -8  246.60   16.19
  -4   2   8  223.10   16.50
   4  -2  -6  196.50   14.29
  -4  -2   6  236.20   15.81
   4   2  -6  189.60   12.82
  -4   2   6  199.50   14.69
   4  -2  -5  706.80   37.09
  -4  -2   5  725.20   37.72
   4   2  -5  665.30   34.36
  -4   2   5  733.80   38.37
   4   2  -4  109.80    9.35
  -4   2   4  106.30   10.83
   4   2  -3    4.86    5.68
  -4   2   3  -11.17    8.58
   4   2  -2  327.60   17.18
  -4   2   2  368.10   20.41
   4  -2   0  618.60   31.44
  -4   2   0  608.20   31.09
   4  -2   1  310.80   17.24
   4  -2   1  330.20   18.15
  -4  -2  -1  330.60   16.96
   4   2   1  314.10   16.09
   4  -2   2  689.30   35.11
   4  -2   2  802.70   40.43
  -4  -2  -2  767.80   38.32
   4   2   2  806.10   40.30
   4  -2   3   74.31    7.15
  -4  -2  -3   65.95    7.07
   4   2   3   82.08    7.77
  -4   2  -3   53.55    8.43
   4   2   4   -5.83    7.29
  -4   2  -4    2.15    7.52
   4  -2   5  210.40   13.99
  -4  -2  -5  187.80   12.34
   4   2   5  226.70   14.66
  -4   2  -5  193.30   13.85
   4  -2   6   25.54    8.01
  -4  -2  -6   27.72    7.67
   4   2   6   27.19    8.32
  -4   2  -6   18.22    8.26
   4  -2   7   48.97    8.90
  -4  -2  -7   50.13    8.64
   4   2   7   46.80    8.20
  -4   2  -7   29.35    8.87
   4  -2   8   75.77    9.06
  -4  -2  -8   76.84    9.53
   4   2   8   49.63    9.87
  -4   2  -8   61.52    9.68
   4  -2   9   -9.29    8.52
  -4  -2  -9    5.21    8.09
   4   2   9   -1.39    9.34
  -4   2  -9    0.32    9.36
   4  -2  10   16.43    8.26
  -4  -2 -10   26.83    8.46
   4   2  10    3.28    9.12
  -4   2 -10   16.29    8.55
   4  -2  11   -7.98    8.10
  -4  -2 -11    9.27    8.18
   4   2  11    3.83    9.46
  -4   2 -11   -4.88    8.78
   4  -2  12   19.38    7.70
  -4  -2 -12    9.84    7.75
   4   2  12   13.75    8.65
  -4   2 -12   -5.99    7.37
   4  -2  13    2.27    7.22
  -4  -2 -13   -7.73    6.64
   4   2  13   17.32    7.72
  -4   2 -13   -3.10    6.12
   4  -3 -15   38.34    7.75
  -4  -3  15   51.30    7.49
   4   3 -15   42.99    7.54
  -4   3  15   56.69    7.85
   4  -3 -14   -6.41    9.01
  -4  -3  14    2.14    8.71
   4   3 -14   10.26    7.52
  -4   3  14   -5.03    8.88
   4  -3 -13   22.02    9.70
  -4  -3  13    8.27    8.00
   4   3 -13   10.24    8.01
  -4   3  13    2.97    8.62
   4  -3 -12    6.65    9.39
  -4  -3  12    2.68    8.45
   4   3 -12   28.96    9.34
  -4   3  12    2.51    8.64
   4  -3 -11    4.03   10.08
  -4  -3  11    1.98    9.17
   4   3 -11    6.64    8.93
  -4   3  11   -4.53    9.56
   4  -3 -10   14.85   10.07
  -4  -3  10   28.01    9.56
   4   3 -10   17.96    9.18
  -4   3  10   -4.12   11.03
   4   3  -9  366.10   22.20
  -4   3   9  347.40   22.01
   4   3  -8   38.70    9.33
  -4   3   8    9.31   11.66
   4   3  -7 1115.00   56.47
  -4   3   7 1086.00   55.76
   4   3  -6  214.90   14.64
  -4   3   6  218.40   15.33
   4   3  -5  171.70   12.57
  -4   3   5  147.60   12.99
   4  -3  -4  343.10   19.98
  -4  -3   4  373.00   20.65
   4   3  -4  357.40   19.91
  -4   3   4  352.20   20.78
   4  -3  -3    0.94    7.82
  -4  -3   3   10.17    7.17
   4   3  -3    0.20    6.18
  -4   3   3    2.56    7.67
   4  -3  -2  294.20   16.92
  -4  -3   2  341.90   18.33
   4   3  -2  276.50   14.86
  -4   3   2  298.60   17.63
   4  -3  -1 2090.00  102.80
  -4  -3   1 2299.00  113.00
  -4  -3   1 2173.00  106.90
  -4   3   1 2140.00  105.30
   4  -3   0  221.10   13.14
  -4   3   0  219.20   13.36
   4  -3   1   64.81    7.85
   4  -3   1   55.44    7.84
  -4  -3  -1   62.92    4.72
   4   3   1   59.87    4.89
   4  -3   2  125.70    9.87
   4  -3   2   96.73    8.64
  -4  -3  -2  120.00    7.91
   4   3   2  123.00    8.68
   4  -3   3  151.50   11.06
   4  -3   3  138.20   10.47
  -4  -3  -3  153.60   10.44
   4  -3   4  180.30   11.72
  -4  -3  -4  178.10   11.85
   4   3   4  188.70   12.77
  -4   3  -4  165.70   12.29
   4  -3   5  617.00   32.45
  -4  -3  -5  728.80   37.55
   4   3   5  657.40   34.21
  -4   3  -5  571.00   30.31
   4  -3   6   23.29    8.52
  -4  -3  -6   41.40    7.76
   4   3   6   44.92    8.32
  -4   3  -6   28.83    8.28
   4  -3   7  199.20   13.63
  -4  -3  -7  173.00   12.45
   4   3   7  173.60   12.77
  -4   3  -7  196.70   14.23
   4  -3   8    5.93    7.37
  -4  -3  -8   12.09    7.94
   4   3   8   12.41    9.97
  -4   3  -8    3.93    8.40
   4  -3   9   53.93    9.48
  -4  -3  -9   40.61    8.72
   4   3   9   30.19    9.89
  -4   3  -9   27.87    9.14
   4  -3  10   13.11    8.36
  -4  -3 -10   -6.74    7.98
   4   3  10   -8.60   10.12
  -4   3 -10   -3.59    7.43
   4  -3  11   32.52    8.63
  -4  -3 -11   26.89    8.65
   4   3  11   28.51   10.80
  -4   3 -11   16.26    8.31
   4  -3  12    6.36    7.24
  -4  -3 -12   -2.95    7.65
   4   3  12   22.17    8.85
  -4   3 -12    3.26    7.04
   4  -3  13   29.48    7.58
  -4  -3 -13   10.32    7.14
   4   3  13   33.85    8.05
  -4   3 -13   32.17    7.00
   4  -4 -15  -10.16    8.51
  -4  -4  15    8.07    6.93
   4   4 -15    1.93    6.01
  -4   4  15   11.52    7.90
   4  -4 -14   40.54   10.70
  -4  -4  14   21.62    7.67
   4  -4 -13   34.90    9.66
  -4  -4  13   50.21    8.30
   4   4 -13   37.13    8.48
  -4   4  13   23.05    8.88
   4  -4 -12   30.25   10.09
  -4  -4  12   59.19    9.17
   4   4 -12   45.14    8.79
  -4   4  12   41.08    9.45
   4  -4 -11   30.88   10.36
  -4  -4  11   17.48    8.92
   4   4 -11   26.98    9.31
  -4   4  11   27.74   10.28
   4  -4 -10    3.52   10.29
  -4  -4  10    9.94    8.96
   4   4 -10   -6.71    8.96
  -4   4  10   11.98    9.47
   4   4  -9   23.50    9.16
  -4   4   9    1.22    9.63
   4  -4  -8  254.80   17.18
  -4  -4   8  274.30   17.78
   4   4  -8  264.60   16.75
  -4   4   8  272.80   18.52
   4   4  -7   30.59    8.03
  -4   4   7    8.28    9.42
   4  -4  -6  227.90   16.08
  -4  -4   6  225.40   14.88
   4   4  -6  184.70   13.12
  -4   4   6  196.00   14.58
   4  -4  -5   34.54   10.02
  -4  -4   5   37.40    8.40
   4   4  -5   18.09    7.54
  -4   4   5   18.75    8.69
   4  -4  -4  488.70   26.77
  -4  -4   4  496.40   26.38
   4   4  -4  456.40   24.43
  -4   4   4  531.00   29.06
   4  -4  -3 2121.00  104.70
  -4  -4   3 2026.00   99.72
   4   4  -3 1921.00   94.51
  -4   4   3 2157.00  106.60
   4  -4  -2   15.02    8.19
  -4  -4   2   28.31    5.86
   4   4  -2   22.56    5.52
  -4   4   2   32.53    8.34
   4  -4  -1  615.80   31.79
  -4  -4   1  616.00   30.69
  -4  -4   1  612.10   30.52
  -4   4   1  601.50   31.44
   4  -4   0  635.30   32.59
  -4   4   0  601.60   31.14
   4  -4   1  273.00   16.17
   4  -4   1  326.00   18.57
  -4  -4  -1  274.60   14.18
   4   4   1  300.50   15.53
   4  -4   2  632.80   32.91
   4  -4   2  611.00   31.70
  -4  -4  -2  587.90   29.55
   4   4   2  651.90   32.76
   4  -4   3   32.10    7.16
   4  -4   3   22.70    7.90
  -4  -4  -3   18.33    5.52
   4   4   3   41.69    6.57
  -4   4  -3   35.27    8.32
   4  -4   4   20.10    6.48
  -4  -4  -4   36.63    6.88
   4   4   4   25.67    8.02
  -4   4  -4   18.64    8.27
   4  -4   5   28.46    7.81
  -4  -4  -5   30.65    8.29
   4   4   5   46.69    8.69
  -4   4  -5   25.40    8.46
   4  -4   6   33.73    9.36
  -4  -4  -6   28.46    8.48
   4   4   6   22.25    8.54
  -4   4  -6   46.22    9.38
   4  -4   7    5.50    7.60
  -4  -4  -7   -7.60    8.43
   4   4   7   -3.74    8.94
  -4   4  -7   -4.70    8.35
   4  -4   8   46.65    8.46
  -4  -4  -8   56.35    8.83
   4   4   8   20.96   10.66
  -4   4  -8   40.98    8.83
   4   4   9   69.40   10.14
  -4   4  -9   66.63    9.26
   4  -4  10   37.91    8.74
  -4  -4 -10   53.82    9.50
   4   4  10   30.43   10.80
  -4   4 -10   54.60    8.40
   4  -4  11   46.25    8.79
  -4  -4 -11   45.25    8.73
   4   4  11   52.65   10.30
  -4   4 -11   52.73    8.82
   4  -4  12    2.76    7.42
  -4  -4 -12   13.25    7.91
   4   4  12    6.00    8.46
  -4   4 -12   -7.03    7.21
   4  -4  13   -2.62    6.49
   4   4  13    4.29    8.17
  -4   4 -13  -13.72    6.93
   4  -5 -15   29.08    7.80
  -4  -5  15   16.01    7.16
   4   5 -15   24.34    5.63
  -4   5  15   27.71    8.12
   4  -5 -14   -2.22    8.49
  -4  -5  14   26.73    8.17
   4   5 -14   -5.15    7.08
  -4   5  14    7.24    8.65
   4  -5 -13   11.50    9.33
  -4  -5  13   24.02    7.81
   4   5 -13   28.61    8.71
  -4   5  13   10.81    9.24
   4  -5 -12    2.84    9.84
  -4  -5  12   14.67    8.02
   4   5 -12    3.27    8.69
  -4   5  12   -2.06    9.51
   4  -5 -11   -8.15   10.22
  -4  -5  11    0.26    8.43
   4   5 -11   -2.62    7.99
  -4   5  11   -4.12    8.90
   4  -5 -10   28.29   10.68
  -4  -5  10   25.08    9.50
   4   5 -10   12.11    8.30
  -4   5  10    9.60   10.09
   4  -5  -9  185.30   14.95
  -4  -5   9  190.00   14.05
   4   5  -9  199.10   14.46
  -4   5   9  195.60   14.76
   4  -5  -8    6.69    9.96
  -4  -5   8   22.68    9.39
   4   5  -8   -0.78    7.62
  -4   5   8   11.77   10.45
   4  -5  -7  748.60   39.52
  -4  -5   7  709.20   37.10
   4   5  -7  696.70   36.15
  -4   5   7  764.70   40.46
   4  -5  -6   -3.53   10.08
  -4  -5   6    6.76    8.25
   4   5  -6    9.94    7.83
  -4   5   6    5.00    8.99
   4  -5  -5    4.62    8.90
  -4  -5   5   13.25    7.95
   4   5  -5    1.48    6.57
  -4   5   5   12.70   11.41
   4  -5  -4   42.37   10.47
  -4  -5   4   44.10    8.15
   4   5  -4   39.60    7.69
  -4   5   4   47.47    8.97
   4  -5  -3    6.51    8.40
  -4  -5   3   11.00    6.77
   4   5  -3   -2.96    6.31
  -4   5   3    3.32    9.18
   4  -5  -2 1056.00   53.29
  -4  -5   2  891.60   44.37
   4   5  -2 1002.00   49.86
  -4   5   2 1003.00   50.90
   4  -5  -1  544.90   28.63
  -4  -5   1  520.10   26.28
  -4  -5   1  552.00   27.76
  -4   5   1  521.80   28.09
   4  -5   0  803.60   41.08
  -4  -5   0  827.80   41.02
  -4  -5   0  884.70   43.82
  -4   5   0  789.30   40.18
   4  -5   1   32.20    8.17
   4  -5   1   37.33    8.81
  -4  -5  -1   16.34    4.45
   4   5   1   31.86    5.13
  -4   5  -1   26.49    8.75
   4  -5   2   25.33    7.98
   4  -5   2   21.87    8.24
  -4  -5  -2    9.24    5.27
   4   5   2   16.95    5.55
   4  -5   3  260.30   15.46
   4  -5   3  295.40   17.42
  -4  -5  -3  302.20   16.62
   4   5   3  276.40   15.43
   4  -5   4    7.76    8.17
   4  -5   4   25.46    7.37
  -4  -5  -4   15.18    5.75
   4   5   4   24.36    8.30
  -4   5  -4   20.85    8.21
   4  -5   5  687.40   35.58
  -4  -5  -5  793.60   40.52
   4   5   5  873.40   44.50
  -4   5  -5  769.90   39.95
   4  -5   6   96.04   10.81
  -4  -5  -6  118.50   11.14
   4   5   6  117.80   10.67
  -4   5  -6  106.50   11.48
   4  -5   7  173.50   13.01
  -4  -5  -7  210.90   14.99
   4   5   7  185.70   13.28
  -4   5  -7  183.90   13.82
   4  -5   8   91.06    9.83
  -4  -5  -8   85.07   10.83
   4   5   8  119.80   12.46
  -4   5  -8  119.90   11.16
   4  -5   9   45.68    9.38
  -4  -5  -9   48.39    8.74
   4   5   9   53.13    9.11
  -4   5  -9   40.07    8.84
   4  -5  10   -2.24    7.70
  -4  -5 -10    1.55    8.61
   4   5  10   17.47   10.13
  -4   5 -10   -7.54    7.29
   4  -5  11   17.00    8.48
  -4  -5 -11   31.24    8.45
   4   5  11   23.38    9.89
  -4   5 -11   24.27    8.15
   4  -5  12    2.52    7.38
  -4  -5 -12   15.30    8.21
   4   5  12    0.08    8.32
  -4   5 -12   16.15    7.68
   4  -6 -15   -7.20    8.83
  -4  -6  15   -6.49    7.44
   4   6 -15    6.81    5.77
  -4   6  15   13.73    7.89
   4  -6 -14   16.47    9.07
  -4  -6  14   14.95    7.46
   4   6 -14   14.94    7.23
  -4   6  14   17.07    8.51
   4  -6 -13   73.02   10.68
  -4  -6  13   76.63    9.22
   4   6 -13   95.88   10.09
  -4   6  13   97.76   11.45
   4  -6 -12   53.20   10.97
  -4  -6  12   55.21    8.54
   4   6 -12   51.52    8.77
  -4   6  12   70.33    9.94
   4  -6 -11   54.53   10.48
  -4  -6  11   70.08    9.67
   4   6 -11   59.56    8.89
  -4   6  11   79.87   11.33
   4  -6 -10   19.36   10.87
  -4  -6  10   10.13    8.41
   4   6 -10   25.32    8.46
  -4   6  10    8.92   10.30
   4  -6  -9  100.10   12.56
  -4  -6   9   92.56   10.73
   4   6  -9   98.37   10.47
  -4   6   9  113.70   11.62
   4  -6  -8   47.56   10.65
  -4  -6   8   65.09   10.22
   4   6  -8   39.92    8.11
  -4   6   8   41.61   10.10
   4  -6  -7  536.00   30.05
  -4  -6   7  523.10   28.41
   4   6  -7  485.70   26.07
  -4   6   7  461.50   26.37
   4  -6  -6 1258.00   63.66
  -4  -6   6 1191.00   59.85
   4   6  -6 1237.00   62.12
  -4   6   6 1435.00   72.44
   4  -6  -5  173.50   14.00
  -4  -6   5  151.10   11.40
   4   6  -5  184.60   12.87
  -4   6   5  159.10   14.58
   4  -6  -4    8.49   10.11
  -4  -6   4    7.46    7.30
   4   6  -4    8.56    7.84
  -4   6   4   23.69    9.00
   4  -6  -3 1045.00   52.71
  -4  -6   3 1107.00   55.28
   4   6  -3 1168.00   58.11
  -4   6   3 1259.00   63.63
   4  -6  -2   -0.19    7.33
  -4  -6   2   -1.43    5.62
  -4  -6   2  -10.18    6.56
   4   6  -2   -2.75    5.55
  -4   6   2   12.01    8.89
   4  -6  -1   20.47    7.95
  -4  -6   1   21.67    4.91
  -4  -6   1   17.99    6.20
  -4   6   1    3.98   10.03
   4  -6   0  493.30   26.93
  -4  -6   0  440.10   22.36
  -4  -6   0  475.40   24.05
   4  -6   1  204.00   13.79
   4  -6   1  210.40   15.12
  -4  -6  -1  210.80   11.96
   4   6   1  182.40   10.72
  -4   6  -1  183.30   13.19
   4  -6   2  518.50   28.00
   4  -6   2  511.70   27.77
  -4  -6  -2  433.00   22.58
   4   6   2  492.10   25.30
   4  -6   3   10.09    8.18
   4  -6   3   10.58    6.87
  -4  -6  -3    8.70    6.46
   4   6   3   13.63    6.51
   4  -6   4  101.40    9.98
   4  -6   4  125.50   11.25
  -4  -6  -4   93.41    8.84
   4   6   4   99.67    9.85
  -4   6  -4  108.30   10.59
   4  -6   5  828.90   42.47
  -4  -6  -5  770.60   39.69
   4   6   5  872.10   44.33
  -4   6  -5  816.60   42.28
   4  -6   6   -7.45    7.80
  -4  -6  -6    1.00    7.87
   4   6   6   -1.48    7.96
  -4   6  -6    0.83    9.15
   4   6   7  112.40   10.86
  -4   6  -7  106.60   11.91
   4  -6   8  112.00   11.27
  -4  -6  -8   96.76   11.63
   4   6   8   99.44   11.28
  -4   6  -8  120.70   11.83
   4  -6   9   79.76    9.53
  -4  -6  -9   91.12   11.11
   4   6   9  101.10   10.12
  -4   6  -9   93.62   10.20
   4  -6  10   26.96    8.03
  -4  -6 -10   13.09    8.90
   4   6  10   28.88    9.47
  -4   6 -10   34.23    7.99
   4  -6  11   67.34    8.82
  -4  -6 -11   55.32    9.82
   4   6  11   63.50    9.98
  -4   6 -11   73.82    9.18
   4  -6  12    3.23    7.41
  -4  -6 -12    4.16    7.81
   4   6  12  -11.33    8.53
  -4   6 -12   -2.72    8.22
   4  -7 -15    0.04    7.25
  -4  -7  15   14.68    6.04
   4   7 -15   16.42    5.91
  -4   7  15   14.42    8.53
   4  -7 -14   -6.66    9.01
  -4  -7  14   -0.37    7.36
   4   7 -14    5.30    6.71
  -4   7  14    2.26    8.75
   4  -7 -13   -8.18    9.89
  -4  -7  13   13.91    8.13
   4   7 -13  -10.34    7.47
  -4   7  13  -15.60    9.74
   4  -7 -12   57.64   10.60
  -4  -7  12   65.26    9.16
   4   7 -12   84.05    9.42
  -4   7  12   67.65    9.63
   4  -7 -11   13.21   10.09
  -4  -7  11   16.84    8.45
   4   7 -11   16.37    8.07
  -4   7  11   24.18    9.15
   4  -7 -10  213.10   16.17
  -4  -7  10  208.50   14.40
   4   7 -10  210.90   14.73
  -4   7  10  164.70   13.65
   4  -7  -9   38.18   10.68
  -4  -7   9   48.23    9.53
   4   7  -9   38.04    9.02
  -4   7   9   41.20   10.71
   4  -7  -8   34.80   11.58
  -4  -7   8   25.63    9.40
   4   7  -8   30.73    8.22
  -4   7   8   46.26   10.61
   4  -7  -7  846.00   44.49
  -4  -7   7  836.60   43.08
   4   7  -7  850.20   43.45
  -4   7   7  907.80   47.47
   4  -7  -6  277.50   18.10
  -4  -7   6  284.20   17.25
   4   7  -6  299.40   18.21
  -4   7   6  301.40   19.81
   4  -7  -5    0.41    9.75
  -4  -7   5   -1.50    7.03
   4  -7  -4  431.90   24.49
  -4  -7   4  407.60   22.02
   4   7  -4  446.50   24.34
  -4   7   4  478.10   26.89
   4  -7  -3  450.20   25.33
  -4  -7   3  418.50   22.81
   4   7  -3  426.30   22.92
  -4   7   3  399.90   22.63
   4  -7  -2  360.10   20.41
  -4  -7   2  369.20   19.62
  -4  -7   2  414.00   22.17
  -4   7   2  390.60   23.18
   4  -7  -1 1784.00   88.38
  -4  -7   1 1843.00   90.66
  -4  -7   1 1846.00   90.74
  -4   7   1 1868.00   92.87
   4  -7   0   -0.31    9.78
  -4  -7   0    6.51    5.36
   4   7   0    4.24    5.06
  -4   7   0    9.46    9.47
   4  -7   1   99.28   11.00
   4  -7   1  106.60   10.60
  -4  -7  -1   94.21    7.80
   4   7   1   78.37    7.30
  -4   7  -1   74.12   10.16
   4  -7   2  906.30   46.31
   4  -7   2  946.10   48.21
  -4  -7  -2  886.00   44.33
   4   7   2  865.30   43.34
   4  -7   3  154.80   12.41
   4  -7   3  135.90   10.90
  -4  -7  -3  148.40   10.60
   4   7   3  149.90   10.69
   4  -7   4  891.70   45.46
   4  -7   4 1039.00   52.65
  -4  -7  -4  906.10   45.89
   4   7   4  956.40   48.61
   4  -7   5  167.30   12.96
   4  -7   5  160.00   12.76
  -4  -7  -5  165.00   12.48
   4   7   5  190.30   13.96
  -4   7  -5  165.40   13.17
   4  -7   6    8.57    8.84
   4  -7   6   12.84    8.13
  -4  -7  -6   -6.30    8.05
   4   7   6   10.85    7.39
  -4   7  -6   18.71    8.67
   4  -7   7  293.40   18.60
  -4  -7  -7  280.40   17.81
   4   7   7  282.60   17.73
  -4   7  -7  309.00   19.10
   4  -7   8  117.80   11.89
  -4  -7  -8  123.70   12.19
   4   7   8  132.30   11.75
  -4   7  -8  148.00   12.58
   4   7   9    9.82    8.31
  -4   7  -9    3.05    9.32
   4   7  10   -1.09    8.69
  -4   7 -10    7.70    7.87
   4  -7  11   23.23    7.79
  -4  -7 -11   15.80    9.38
   4   7  11    4.94    8.93
  -4   7 -11   -4.38    7.49
   4  -7  12   28.18    7.76
  -4  -7 -12   21.25    9.01
   4  -8 -15    3.17    8.48
  -4  -8  15    6.56    6.11
   4   8 -15    3.61    5.90
  -4   8  15   -1.14    7.46
   4  -8 -14   -6.91    8.98
  -4  -8  14    2.29    6.94
   4   8 -14    2.65    6.57
  -4   8  14   15.61    9.55
   4  -8 -13   44.94   10.62
  -4  -8  13   51.16    8.49
   4   8 -13   37.61    8.03
  -4   8  13   38.03   11.48
   4  -8 -12   91.01   11.66
  -4  -8  12   82.12    9.81
   4   8 -12   85.33    9.64
  -4   8  12  112.40   13.23
   4  -8 -11   12.99   10.71
  -4  -8  11   12.42    8.25
   4   8 -11   40.10    9.12
  -4   8  11   17.85   11.68
   4  -8 -10   27.61   10.82
  -4  -8  10   35.15    8.91
   4   8 -10   28.44    8.80
  -4   8  10   23.22   12.31
   4  -8  -9  306.40   19.73
  -4  -8   9  311.40   19.02
   4   8  -9  344.40   20.38
  -4   8   9  365.90   22.81
   4  -8  -8   12.73   11.01
  -4  -8   8    0.78    8.53
   4   8  -8    5.32    8.66
  -4   8   8   -0.69   10.95
   4  -8  -7  932.20   48.38
  -4  -8   7  916.30   46.99
   4   8  -7  939.30   47.93
  -4   8   7  955.80   49.65
   4  -8  -6  923.90   47.94
  -4  -8   6  874.40   44.73
   4   8  -6  924.60   47.42
  -4   8   6  909.90   47.14
   4  -8  -5   28.06   10.24
  -4  -8   5   -0.16    6.92
   4   8  -5   -0.20    7.80
  -4   8   5  -16.90   10.30
   4  -8  -4  176.80   13.93
  -4  -8   4  171.10   11.84
   4   8  -4  196.80   13.44
  -4   8   4  211.30   16.37
   4  -8  -3 1500.00   75.06
  -4  -8   3 1520.00   75.54
  -4  -8   3 1416.00   70.48
   4   8  -3 1463.00   72.70
  -4   8   3 1513.00   75.88
   4  -8  -2    2.77    9.11
  -4  -8   2    2.50    6.15
  -4  -8   2    4.82    6.82
  -4   8   2   15.57   10.15
   4  -8  -1   55.06    9.42
  -4  -8   1   71.05    8.07
  -4  -8   1   68.99    7.30
  -4   8   1   62.75   11.21
   4  -8   0   43.52    9.00
  -4  -8   0   42.05    6.67
   4   8   0   43.69    6.55
  -4   8   0   25.69   10.29
   4  -8   1  802.00   41.21
   4  -8   1  826.90   42.65
  -4  -8  -1  759.00   38.18
   4   8   1  828.90   41.68
  -4   8  -1  764.90   39.73
   4  -8   2  776.50   40.42
   4  -8   2  809.30   41.65
  -4  -8  -2  804.00   40.64
   4   8   2  719.00   36.44
   4  -8   3  164.90   12.55
   4  -8   3  184.10   12.89
  -4  -8  -3  167.20   11.50
   4   8   3  200.60   13.35
   4  -8   4   86.91   10.36
   4  -8   4   61.70    8.05
  -4  -8  -4   67.65    8.87
   4   8   4   67.84    8.91
   4  -8   5  702.70   36.93
   4  -8   5  719.10   37.58
  -4  -8  -5  763.70   39.58
   4   8   5  766.20   39.64
   4  -8   6   24.82    8.05
   4  -8   6   30.65    9.02
  -4  -8  -6   31.21    9.30
   4   8   6   18.71    8.65
  -4   8  -6   26.08    9.23
   4  -8   7  142.20   11.30
   4  -8   7  172.00   13.13
  -4  -8  -7  179.50   14.20
   4   8   7  204.70   15.51
  -4   8  -7  163.40   13.75
   4  -8   8   76.42    8.84
   4  -8   8   94.86   10.50
  -4  -8  -8   95.03   11.44
   4   8   8   82.68   10.93
  -4   8  -8   90.13   10.85
   4  -8   9   80.23    9.44
   4  -8   9   81.99    9.59
  -4  -8  -9  113.80   12.06
   4   8   9   77.20   10.39
  -4   8  -9   96.51    9.90
   4  -8  10   41.36    8.51
  -4  -8 -10   48.22   10.78
   4   8  10   39.18   10.01
  -4   8 -10   64.68    9.66
   4  -8  11   25.94    8.09
   4  -8  11   33.06    7.19
  -4  -8 -11   13.22    9.53
   4   8  11   15.71   10.53
  -4   8 -11    7.17    7.26
   4  -8  12    2.58    5.70
   4  -8  12   -8.76    7.03
  -4  -8 -12   -3.71    8.75
   4   8  12    4.16    8.87
  -4   8 -12   -3.77    7.16
   4  -9 -14   20.36    8.60
  -4  -9  14    2.32    6.40
   4   9 -14    4.85    6.22
  -4   9  14    2.79    9.10
   4  -9 -13   31.20   10.31
  -4  -9  13    7.63    7.44
   4   9 -13   13.14    7.62
  -4   9  13   -1.55   10.49
   4  -9 -12   -4.73   10.31
  -4  -9  12  -18.44    8.07
   4   9 -12   -4.89    7.41
  -4   9  12   -8.72   10.30
   4  -9 -11   24.58   10.81
  -4  -9  11    2.59    7.96
   4   9 -11    6.67    7.78
  -4   9  11    8.36   11.14
   4  -9 -10   38.50   10.96
  -4  -9  10   11.21    8.68
   4   9 -10   22.68    8.16
  -4   9  10   33.48   11.52
   4  -9  -9  250.30   17.62
  -4  -9   9  223.10   14.78
   4   9  -9  217.00   14.69
  -4   9   9  248.70   18.13
   4  -9  -8   56.82   11.40
  -4  -9   8   32.21    9.44
   4   9  -8   43.21    9.53
  -4   9   8   50.20   11.99
   4  -9  -7   79.69   11.92
  -4  -9   7   98.77   10.11
   4   9  -7   97.22    9.93
  -4   9   7  116.20   11.26
   4  -9  -6  596.70   32.63
  -4  -9   6  507.70   27.18
   4   9  -6  552.60   29.82
  -4   9   6  615.10   33.86
   4  -9  -5   50.26   12.04
  -4  -9   5   49.19    7.62
   4   9  -5   39.45    8.27
  -4   9   5   59.47   11.47
   4  -9  -4   48.43   10.47
  -4  -9   4   37.80    8.39
   4   9  -4   28.62    8.14
  -4   9   4   24.74    9.30
   4  -9  -3  436.70   24.76
  -4  -9   3  433.60   23.61
  -4  -9   3  391.20   21.30
  -4   9   3  403.10   23.67
   4  -9  -2 1056.00   53.60
  -4  -9   2 1145.00   57.21
  -4  -9   2 1033.00   51.89
  -4   9   2 1057.00   54.05
   4  -9  -1  379.30   21.83
  -4  -9   1  380.30   20.71
  -4  -9   1  376.20   20.44
  -4   9   1  371.60   22.36
   4  -9   0  165.60   13.27
  -4  -9   0  170.50   11.50
   4   9   0  166.60   11.00
  -4   9   0  136.40   12.50
   4  -9   1  619.50   32.81
  -4  -9  -1  670.90   34.12
   4   9   1  630.80   32.25
  -4   9  -1  614.60   32.83
   4  -9   2  -14.45    8.97
   4  -9   2    0.28    8.89
  -4  -9  -2   -3.95    7.02
   4   9   2   -3.65    6.72
   4  -9   3   17.62    8.95
   4  -9   3   19.15    9.51
  -4  -9  -3   22.93    7.30
   4   9   3   17.98    8.15
   4  -9   4  427.20   23.56
   4  -9   4  469.60   26.09
  -4  -9  -4  397.30   22.21
   4   9   4  419.00   23.05
   4  -9   5  302.40   18.02
   4  -9   5  317.60   19.33
  -4  -9  -5  315.40   18.98
   4   9   5  294.00   17.56
   4  -9   6   -3.23    7.92
   4  -9   6   -6.24    8.24
  -4  -9  -6   -4.19    9.05
   4   9   6   -7.53    8.76
  -4   9  -6   -0.34    8.60
   4  -9   7  104.90   10.84
   4  -9   7  108.60   10.27
  -4  -9  -7  115.50   11.86
   4   9   7  108.20   12.31
  -4   9  -7   99.54   11.09
   4  -9   8   52.96    9.20
   4  -9   8   53.64    8.43
  -4  -9  -8   33.90   10.30
   4   9   8   55.21   10.44
  -4   9  -8   62.84   10.15
   4  -9   9    0.02    7.10
   4  -9   9    7.59    7.36
  -4  -9  -9    1.65    8.56
   4   9   9   -7.50    9.60
  -4   9  -9    5.40    7.81
   4  -9  10   -8.01    6.59
   4  -9  10   -0.73    7.19
  -4  -9 -10  -15.33    9.45
   4   9  10   22.58   10.52
  -4   9 -10   13.20    8.58
   4  -9  11   16.16    6.71
   4  -9  11   34.12    8.49
  -4  -9 -11    8.52   10.02
   4   9  11   15.17   10.68
  -4   9 -11   29.15    8.47
   4  -9  12   25.54    7.29
   4  -9  12   28.05    7.20
  -4  -9 -12   12.12    8.59
   4   9  12   20.93    9.89
  -4   9 -12   22.83    6.96
   4 -10 -14   -0.25    8.58
  -4 -10  14    3.30    6.47
   4  10 -14    7.91    5.99
  -4  10  14   -2.99    8.52
   4 -10 -13   43.12    9.97
  -4 -10  13   47.25    7.88
   4  10 -13   39.40    7.46
  -4  10  13   48.00   10.66
   4 -10 -12   83.27   11.80
  -4 -10  12  108.40   10.59
   4  10 -12  100.70   10.04
  -4  10  12   98.94   11.89
   4 -10 -11   90.62   12.17
  -4 -10  11  100.30   10.51
   4  10 -11  103.70   10.59
  -4  10  11   83.89   12.40
   4 -10 -10   -3.47    9.60
  -4 -10  10    9.38    8.52
   4  10 -10    5.54    8.26
  -4  10  10    2.96   11.33
   4 -10  -9   35.08   11.10
  -4 -10   9   35.80    8.45
   4  10  -9   34.45    8.66
  -4  10   9   27.24   11.58
   4 -10  -8   -0.79   10.63
  -4 -10   8   -6.49    9.10
   4  10  -8  -13.21    9.19
  -4  10   8   19.45    9.59
   4 -10  -7  205.80   15.70
  -4 -10   7  238.10   15.51
   4  10  -7  210.80   14.55
  -4  10   7  212.40   15.43
   4 -10  -6    5.62   10.36
  -4 -10   6    3.76    7.04
   4  10  -6    1.64    8.19
  -4  10   6   -1.04   10.98
   4 -10  -5  316.20   19.81
  -4 -10   5  350.80   20.51
   4  10  -5  335.70   19.40
  -4  10   5  342.30   22.22
   4 -10  -4 2821.00  139.40
  -4 -10   4 2818.00  138.70
  -4 -10   4 2888.00  142.10
   4  10  -4 2859.00  140.80
  -4  10   4 2960.00  146.10
   4 -10  -3 1255.00   63.70
  -4 -10   3 1251.00   62.70
  -4 -10   3 1102.00   55.27
  -4  10   3 1244.00   63.16
   4 -10  -2  672.40   35.50
  -4 -10   2  691.00   35.82
  -4 -10   2  649.50   33.48
  -4  10   2  626.10   33.89
   4 -10  -1   10.05    9.26
  -4 -10   1   12.92    6.99
  -4 -10   1   18.34    7.85
  -4  10   1    1.40   11.04
   4 -10   0    5.93    9.20
  -4 -10   0    4.52    6.81
   4  10   0   14.38    6.19
  -4  10   0    3.66    9.34
   4 -10   1  431.40   24.58
  -4 -10  -1  418.30   22.60
   4  10   1  425.60   22.53
  -4  10  -1  388.20   22.52
   4 -10   2 1223.00   62.07
   4 -10   2 1336.00   67.21
  -4 -10  -2 1247.00   62.06
   4  10   2 1277.00   63.77
   4 -10   3  370.90   21.57
   4 -10   3  390.50   23.12
  -4 -10  -3  349.20   19.79
   4  10   3  433.40   23.88
   4 -10   4   27.24    9.05
   4 -10   4    7.69    8.34
  -4 -10  -4   12.43    9.38
   4  10   4   21.64    7.71
   4 -10   5  307.50   18.92
   4 -10   5  318.20   18.76
  -4 -10  -5  325.60   19.53
   4  10   5  318.80   19.05
   4 -10   6   27.82    9.62
   4 -10   6    8.16    7.96
  -4 -10  -6   13.19    9.74
   4  10   6   23.51    8.86
   4 -10   7   88.31    9.66
   4 -10   7   86.61   10.36
  -4 -10  -7   63.49   10.72
   4  10   7   72.79   10.10
  -4  10  -7   69.91   10.86
   4 -10   8   14.55    8.57
   4 -10   8    9.71    8.09
  -4 -10  -8    3.81    9.94
   4  10   8   19.56    9.46
  -4  10  -8   28.25    8.29
   4 -10   9   70.36    8.68
   4 -10   9   70.64    8.93
  -4 -10  -9   65.70   10.49
   4  10   9   72.40   10.93
  -4  10  -9   78.35    9.78
   4 -10  10  156.40   11.86
   4 -10  10  134.10   10.25
  -4 -10 -10  135.20   12.30
   4  10  10  183.50   14.60
  -4  10 -10  166.50   12.39
   4 -10  11   24.94    6.70
   4 -10  11   40.92    8.45
  -4 -10 -11   42.45   11.02
   4  10  11   40.52   10.12
  -4  10 -11   30.96    7.87
   4 -10  12    2.09    6.96
   4 -10  12   -6.74    6.34
  -4 -10 -12   -1.94    8.77
   4  10  12   -7.96    8.18
  -4  10 -12   -3.31    6.23
   4 -11 -14   -7.45    8.41
  -4 -11  14    3.65    6.78
   4  11 -14   -1.93    5.94
  -4  11  14    9.03    7.93
   4 -11 -13  -14.97    9.52
  -4 -11  13    7.06    7.52
   4  11 -13    4.20    7.03
  -4  11  13    8.52    9.11
   4 -11 -12   13.27   10.46
  -4 -11  12   12.84    7.72
   4  11 -12    0.49    7.18
  -4  11  12    7.84    9.22
   4 -11 -11   36.72   10.75
  -4 -11  11   27.66    8.48
   4  11 -11   34.17    8.04
  -4  11  11   25.59    9.72
   4 -11 -10   99.62   11.99
  -4 -11  10  105.20   10.63
   4  11 -10  108.60   10.30
  -4  11  10  121.80   12.64
   4 -11  -9   96.90   12.51
  -4 -11   9  113.80   10.79
   4  11  -9   87.46   10.19
  -4  11   9   85.79   11.13
   4 -11  -8   -2.09   10.28
  -4 -11   8   -4.06    8.99
   4  11  -8   -4.76    7.87
  -4  11   8   -7.73    9.52
   4 -11  -7   23.15   10.60
  -4 -11   7   33.13    8.59
   4  11  -7   39.98    9.67
  -4  11   7   42.88   11.75
   4 -11  -6   55.68   12.03
  -4 -11   6   37.81    7.84
   4  11  -6   43.65    9.23
  -4  11   6   52.97   11.21
   4 -11  -5  103.60   12.55
  -4 -11   5  109.90   11.01
  -4 -11   5  106.20   10.45
   4  11  -5   84.59    9.66
  -4  11   5  104.70   12.39
   4 -11  -4    0.18    9.51
  -4 -11   4    7.88    7.35
  -4 -11   4    3.30    8.26
  -4  11   4    0.47   10.95
   4 -11  -3  605.10   32.50
  -4 -11   3  629.80   32.79
  -4 -11   3  613.60   32.18
  -4  11   3  640.20   34.05
   4 -11  -2  765.40   40.16
  -4 -11   2  800.10   40.93
  -4 -11   2  784.50   40.13
  -4  11   2  780.70   41.04
   4 -11  -1   10.90    9.61
  -4 -11   1    5.75    7.32
  -4 -11   1   -0.60    7.77
  -4  11   1  -10.20   10.18
   4 -11   0   46.76   10.20
  -4 -11   0   49.66    7.53
   4  11   0   50.67    7.31
  -4  11   0   61.92    9.72
   4 -11   1   41.23   10.12
  -4 -11  -1   43.89    7.95
   4  11   1   29.42    8.14
  -4  11  -1   38.45    9.46
   4 -11   2   34.45   10.04
   4 -11   2   34.71   10.32
  -4 -11  -2   29.77    7.74
   4  11   2   35.35    8.80
   4 -11   3  274.20   17.88
   4 -11   3  273.20   17.33
  -4 -11  -3  227.10   14.54
   4  11   3  259.00   15.85
   4 -11   4  204.00   15.07
   4 -11   4  241.10   15.46
  -4 -11  -4  212.80   14.54
   4  11   4  219.90   14.27
   4 -11   5  106.30   10.17
   4 -11   5  142.10   13.08
  -4 -11  -5  116.80   11.58
   4  11   5   99.54   10.40
   4 -11   6   10.52    8.48
   4 -11   6   12.45    8.16
  -4 -11  -6    2.49    9.70
   4  11   6   19.67   10.24
   4 -11   7   46.78    9.46
   4 -11   7   48.49    9.06
  -4 -11  -7   41.55   10.76
   4  11   7   51.71   10.30
   4 -11   8   66.26    9.23
   4 -11   8   49.11    8.82
   4  11   8   59.57    9.97
   4 -11   9   51.53    8.13
   4 -11   9   36.18    7.62
  -4 -11  -9   32.40    9.97
   4  11   9   38.94    8.61
  -4  11  -9   49.35    8.16
   4 -11  10   -0.90    6.02
   4 -11  10   -8.70    6.87
  -4 -11 -10   -4.01    8.84
   4  11  10   -3.71    8.83
  -4  11 -10    1.97    7.44
   4 -11  11   23.29    7.49
   4 -11  11   16.11    7.33
  -4 -11 -11   -8.38   10.07
   4  11  11    4.19    9.04
  -4  11 -11   19.49    7.43
   4 -11  12    5.93    5.80
   4 -11  12    1.81    6.87
  -4 -11 -12   -2.92    8.80
   4  11  12    7.68    6.98
  -4  11 -12    0.18    6.36
   4 -12 -14   -6.14    7.21
  -4 -12  14    4.11    6.40
   4  12 -14   -0.77    5.91
  -4  12  14   -2.02    7.31
   4 -12 -13   34.42    9.76
  -4 -12  13   41.18    7.72
   4  12 -13   45.59    7.42
  -4  12  13   29.36    8.72
   4 -12 -12   69.36   11.24
  -4 -12  12   84.03    9.07
   4  12 -12   97.61    9.49
  -4  12  12   81.70    9.46
   4 -12 -11   48.50   10.81
  -4 -12  11   33.75    8.47
   4  12 -11   33.66    8.01
  -4  12  11   23.53    9.76
   4 -12 -10   60.07   11.32
  -4 -12  10   41.46    8.39
   4  12 -10   56.69    9.24
  -4  12  10   57.99   11.59
   4 -12  -9   21.11    9.84
  -4 -12   9   15.97    8.60
   4  12  -9   29.50    8.26
  -4  12   9   24.00   11.46
   4 -12  -8  439.40   25.47
  -4 -12   8  475.10   26.34
   4  12  -8  497.00   27.53
  -4  12   8  471.60   27.48
   4 -12  -7  148.30   14.19
  -4 -12   7  180.60   13.29
   4  12  -7  160.90   13.28
  -4  12   7  166.30   14.92
   4 -12  -6  483.80   27.60
  -4 -12   6  503.00   27.34
   4  12  -6  465.40   25.81
  -4  12   6  460.90   26.43
   4 -12  -5   91.57   11.23
  -4 -12   5   98.40   10.24
  -4 -12   5   89.46   10.88
   4  12  -5   68.39   10.00
  -4  12   5   68.46   11.97
   4 -12  -4  219.40   16.92
  -4 -12   4  168.70   11.96
  -4 -12   4  198.70   14.18
  -4  12   4  205.70   16.36
   4 -12  -3  273.20   17.44
  -4 -12   3  281.40   17.31
  -4 -12   3  287.90   17.11
  -4  12   3  271.10   18.43
   4 -12  -2  532.90   29.69
  -4 -12   2  518.90   27.70
  -4 -12   2  553.00   29.72
  -4  12   2  476.50   27.50
   4 -12  -1    0.36   10.24
  -4 -12   1   13.81    7.62
  -4 -12   1   11.36    7.89
  -4  12   1   15.94   10.34
   4 -12   0  147.80   11.89
  -4 -12   0  131.30   10.36
   4  12   0  151.50   11.60
  -4  12   0  130.50   12.71
   4 -12   1  239.40   16.86
  -4 -12  -1  273.60   16.11
   4  12   1  278.00   17.35
  -4  12  -1  224.30   15.92
   4 -12   2  768.70   40.27
   4 -12   2  758.20   40.01
  -4 -12  -2  697.40   35.92
   4  12   2  714.60   37.27
   4 -12   3  220.50   15.11
   4 -12   3  210.20   15.23
  -4 -12  -3  204.20   14.12
   4  12   3  221.80   13.98
   4 -12   4  309.40   19.76
   4 -12   4  298.10   18.32
  -4 -12  -4  305.00   18.68
   4  12   4  307.30   18.39
   4 -12   5  355.20   20.83
   4 -12   5  379.40   21.94
  -4 -12  -5  412.10   23.82
   4  12   5  338.30   19.90
   4 -12   6  281.70   17.37
   4 -12   6  281.30   17.59
  -4 -12  -6  247.90   17.05
   4  12   6  265.30   17.56
   4 -12   7  121.10   11.45
   4 -12   7  115.70   10.54
  -4 -12  -7  135.00   13.27
   4  12   7  147.20   12.44
   4 -12   8  129.70   11.17
   4 -12   8  145.20   11.66
  -4 -12  -8  126.20   12.23
   4  12   8  119.70   12.01
   4 -12   9    4.64    7.32
   4 -12   9   11.77    8.01
  -4 -12  -9    0.59   10.26
   4  12   9    7.91    9.48
   4 -12  10   84.33    8.43
   4 -12  10   90.54    8.94
  -4 -12 -10   91.89   11.24
   4  12  10   76.36   11.23
   4 -12  11    1.59    7.29
   4 -12  11   11.46    7.01
  -4 -12 -11   29.78   10.37
   4  12  11   28.90    9.74
   4 -12  12   20.17    6.62
   4 -12  12    6.46    5.48
  -4 -12 -12   -4.31    9.16
   4  12  12    1.38    9.24
   4 -13 -14   14.43    8.34
  -4 -13  14   -2.73    6.74
   4  13 -14   -1.55    5.51
  -4  13  14   17.02    8.39
   4 -13 -13   16.90    9.50
  -4 -13  13   -3.21    6.68
   4  13 -13    4.95    6.88
  -4  13  13   -0.47    7.74
   4 -13 -12    3.74    9.39
  -4 -13  12    8.30    7.43
   4  13 -12   -6.85    7.41
  -4  13  12   18.12    8.64
   4 -13 -11   92.03   12.20
  -4 -13  11   79.57    8.84
   4  13 -11   97.33    9.91
  -4  13  11   84.22   12.15
   4 -13 -10   20.81   10.16
  -4 -13  10    6.82    8.02
   4  13 -10    3.89    8.30
  -4  13  10   11.31   11.31
   4 -13  -9   46.40   10.92
  -4 -13   9   44.14    8.89
   4  13  -9   29.11    8.84
  -4  13   9   35.81   11.00
   4 -13  -8   11.18   10.51
  -4 -13   8   22.50    8.22
   4 -13  -7   -0.93   10.97
  -4 -13   7    5.53    8.17
  -4 -13   7    2.20    8.47
   4  13  -7   -7.75    8.59
  -4  13   7   10.82   11.06
   4 -13  -6   21.80   13.37
  -4 -13   6   16.06    8.58
  -4 -13   6   32.96    9.12
   4  13  -6   23.52    8.82
  -4  13   6   24.64   11.21
   4 -13  -5   75.62   11.58
  -4 -13   5  107.40   11.17
  -4 -13   5  101.50    9.95
  -4  13   5   98.56   12.64
   4 -13  -4   -2.32   10.91
  -4 -13   4   -2.23    8.48
  -4 -13   4    9.81    6.90
  -4  13   4   16.00   11.09
   4 -13  -3  338.90   20.29
  -4 -13   3  366.60   21.10
  -4  13   3  391.50   23.81
   4 -13  -2  222.20   15.72
  -4 -13   2  250.40   15.47
  -4 -13   2  245.40   15.95
  -4  13   2  211.90   16.55
   4 -13  -1  444.20   25.34
  -4 -13   1  440.60   23.88
  -4 -13   1  451.10   24.54
   4  13  -1  426.30   23.46
  -4  13   1  433.70   25.62
   4 -13   0   31.10    9.88
  -4 -13   0   40.28    8.21
   4  13   0   22.31    8.31
  -4  13   0   39.18   11.02
   4 -13   1   88.46   10.95
  -4 -13  -1   81.80    9.37
   4  13   1   96.16   10.53
  -4  13  -1   59.58   11.02
   4 -13   2   -0.32    9.58
   4 -13   2    0.62    9.62
  -4 -13  -2    4.36    7.59
   4  13   2   17.56    8.33
   4 -13   3  989.40   50.78
   4 -13   3  901.10   46.61
  -4 -13  -3  872.00   44.63
   4  13   3  924.00   47.09
   4 -13   4  178.60   13.88
   4 -13   4  190.70   15.52
  -4 -13  -4  216.00   15.04
   4  13   4  190.70   13.57
   4 -13   5   27.46    8.43
   4 -13   5   16.73    9.74
  -4 -13  -5   31.10   10.26
   4  13   5    7.66    9.61
   4 -13   6    9.29    7.99
   4 -13   6   -3.73    7.97
  -4 -13  -6   12.60    9.62
   4  13   6   -0.19    9.37
   4 -13   7  103.80   10.67
   4 -13   7  130.60   11.21
  -4 -13  -7  109.10   12.88
   4  13   7  105.00   11.32
   4 -13   8   -0.82    7.61
   4 -13   8   10.88    8.10
  -4 -13  -8   16.78    9.87
   4  13   8    8.92    9.90
   4 -13   9   41.28    8.14
   4 -13   9   29.34    7.78
  -4 -13  -9   31.50   10.80
   4  13   9   17.68    9.22
   4 -13  10   -1.39    6.50
   4 -13  10   -8.41    7.11
  -4 -13 -10   -2.98    9.82
   4  13  10    9.34   10.13
   4 -13  11   13.66    6.92
   4 -13  11   26.36    7.23
  -4 -13 -11   10.15    9.35
   4  13  11   12.17    9.99
   4 -14 -14   32.93    9.12
  -4 -14  14    4.23    6.78
   4  14 -14    6.32    5.39
  -4  14  14   11.60    7.15
   4 -14 -13    5.20    9.39
  -4 -14  13   -0.19    6.90
   4  14 -13    3.62    6.81
  -4  14  13   14.94    8.62
   4 -14 -12   89.69   11.17
  -4 -14  12   87.24    9.30
   4  14 -12   82.15    8.85
  -4  14  12   75.09   10.64
   4 -14 -11    0.24   10.51
  -4 -14  11   12.67    7.47
   4  14 -11    3.96    7.65
  -4  14  11    1.55   10.37
   4 -14 -10   20.17    9.88
  -4 -14  10   25.00    7.78
   4  14 -10   38.01    8.93
  -4  14  10   19.16   10.68
   4 -14  -9   10.16    9.71
  -4 -14   9   11.16    7.80
   4  14  -9    4.29    8.16
  -4  14   9   -0.50   11.82
   4 -14  -8  127.30   12.95
  -4 -14   8   96.19   10.28
  -4 -14   8  122.40   11.56
   4  14  -8  101.40   10.30
  -4  14   8   95.57   13.46
   4 -14  -7   87.21   12.04
  -4 -14   7  102.00   10.41
  -4 -14   7   72.69    9.90
   4  14  -7   92.16   10.42
  -4  14   7   64.98   12.40
   4 -14  -6    5.14   10.09
  -4 -14   6   -4.11    8.45
  -4 -14   6   -6.58    8.41
  -4  14   6   -6.65   10.78
   4 -14  -5    5.93    9.36
  -4 -14   5  -12.71    8.59
  -4 -14   5   -5.85    7.89
  -4  14   5   -0.09   11.46
   4 -14  -4  991.70   51.31
  -4 -14   4  890.20   45.61
  -4 -14   4  928.00   47.37
  -4  14   4  908.10   47.02
   4 -14  -3  279.20   17.91
  -4 -14   3  334.80   20.06
  -4 -14   3  315.70   18.56
  -4  14   3  298.70   19.68
   4 -14  -2   -5.63   10.34
  -4 -14   2    2.10    9.90
  -4 -14   2    1.92    7.74
  -4  14   2    2.68   12.00
   4 -14  -1   -1.08    9.73
  -4 -14   1   15.58    8.71
  -4 -14   1    8.58    7.72
   4  14  -1    6.34    8.11
  -4  14   1    5.02   11.81
   4 -14   0   17.33    9.62
  -4 -14   0   11.39    8.12
   4  14   0    6.23    8.31
  -4  14   0    4.28   10.24
   4 -14   1  194.10   14.79
  -4 -14  -1  188.60   12.71
   4  14   1  182.40   12.74
  -4  14  -1  177.50   14.84
   4 -14   2 1019.00   52.57
   4 -14   2  958.00   49.53
  -4 -14  -2  945.10   48.15
   4  14   2 1029.00   52.03
   4 -14   3  190.80   14.94
   4 -14   3  186.60   14.38
  -4 -14  -3  169.20   13.52
   4  14   3  154.00   12.69
   4 -14   4   54.88   11.37
   4 -14   4   26.09    9.97
  -4 -14  -4   52.81    9.26
   4  14   4   29.88    7.98
   4 -14   5  107.00   10.99
   4 -14   5  112.20   11.95
  -4 -14  -5   97.45   11.55
   4  14   5  101.00   11.99
   4 -14   6   34.18    8.56
   4 -14   6    6.62    8.64
  -4 -14  -6   27.13   10.60
   4  14   6    4.56    8.68
   4 -14   7   58.16    9.22
   4 -14   7   74.82    9.76
  -4 -14  -7   85.73   12.28
   4  14   7   68.85   10.49
   4 -14   8   31.63    8.58
   4 -14   8   14.97    7.73
  -4 -14  -8    9.30   10.98
   4  14   8   25.30   10.01
   4 -14   9   10.11    7.21
   4 -14   9   10.91    7.44
  -4 -14  -9   -6.14    9.85
   4  14   9   12.13    9.50
   4 -14  10  127.20   10.66
   4 -14  10  137.00   10.37
  -4 -14 -10  122.30   12.29
   4  14  10  127.50   13.05
   4 -14  11    9.18    6.92
   4 -14  11   -1.41    6.68
  -4 -14 -11    4.09    8.66
   4  14  11   16.61    9.00
   4 -15 -13   13.00    8.88
  -4 -15  13   14.68    6.45
   4  15 -13   20.87    6.50
  -4  15  13   24.52    8.93
   4 -15 -12   -9.06    9.81
  -4 -15  12   -7.42    6.79
   4  15 -12   -1.31    7.20
  -4  15  12    2.42    9.54
   4 -15 -11   19.05    9.97
  -4 -15  11   19.65    7.60
   4  15 -11    7.10    6.93
  -4  15  11    3.29   10.65
   4 -15 -10   -2.41    8.01
  -4 -15  10    0.70    7.75
  -4 -15  10    5.92    6.68
   4  15 -10    9.81    8.48
  -4  15  10    4.33   11.74
   4 -15  -9   79.19   11.22
  -4 -15   9   83.53    9.56
  -4 -15   9   67.00    8.94
   4  15  -9   88.26    9.92
  -4  15   9   77.53   12.58
   4 -15  -8    0.21    9.86
  -4 -15   8    5.27    8.24
  -4 -15   8    9.51    8.23
   4  15  -8    1.94    8.63
  -4  15   8   28.02   12.14
   4 -15  -7   13.30   10.76
  -4 -15   7   10.22    9.06
  -4 -15   7    1.70    8.87
   4  15  -7   14.90    8.30
  -4  15   7   20.31   11.17
   4 -15  -6   10.82   10.32
  -4 -15   6   17.97    8.88
  -4 -15   6   17.72    8.65
  -4  15   6   13.44   11.52
   4 -15  -5   27.36   10.01
  -4 -15   5   34.27    8.53
  -4 -15   5   65.24   10.43
  -4  15   5   48.43   11.47
   4 -15  -4   69.56   12.12
  -4 -15   4   83.93   10.01
  -4 -15   4   77.78    8.91
  -4  15   4   87.02   10.92
   4 -15  -3  687.50   36.66
  -4 -15   3  715.60   37.45
  -4 -15   3  711.50   36.93
  -4  15   3  710.00   38.30
   4 -15  -2    5.53   10.49
  -4 -15   2   27.60    8.28
  -4 -15   2   33.86    8.99
  -4  15   2   15.12   12.25
   4 -15  -1  152.10   12.99
  -4 -15   1  165.50   12.83
  -4 -15   1  163.70   12.35
   4  15  -1  156.50   12.86
  -4  15   1  149.10   14.29
   4 -15   0    6.65    9.75
  -4 -15   0   -3.88    7.47
   4  15   0   14.48    8.98
  -4  15   0    4.61    9.42
   4 -15   1  540.40   29.75
  -4 -15  -1  535.10   28.78
   4  15   1  501.30   27.17
  -4  15  -1  494.10   28.13
   4 -15   2  115.50   11.88
   4 -15   2  130.70   12.86
  -4 -15  -2  115.00   11.26
   4  15   2  117.70   10.96
  -4  15  -2  105.60   12.05
   4 -15   3    3.47   10.48
   4 -15   3   -6.03    9.37
  -4 -15  -3   -6.49    8.84
   4  15   3   -8.74    8.18
   4 -15   4   45.71   10.47
   4 -15   4   36.71    9.27
  -4 -15  -4   41.60   10.39
   4  15   4   43.14    9.50
   4 -15   5  203.60   14.25
   4 -15   5  183.20   13.45
  -4 -15  -5  195.10   14.77
   4  15   5  168.80   13.83
   4 -15   6    2.95    7.58
   4 -15   6    6.20    8.37
  -4 -15  -6  -12.68   10.29
   4  15   6    9.32    9.20
   4 -15   7    7.34    7.73
   4 -15   7   10.72    8.76
  -4 -15  -7   -1.92   10.48
   4  15   7    9.38    8.44
   4 -15   8    9.80    7.42
   4 -15   8    6.54    7.92
  -4 -15  -8   10.87   11.14
   4  15   8   -7.68    8.83
   4 -15   9   52.78    8.65
   4 -15   9   45.80    7.83
  -4 -15  -9   68.30   11.45
   4  15   9   28.59   10.39
   4 -15  10    1.55    7.70
   4 -15  10    7.58    6.78
  -4 -15 -10    5.84   10.59
   4  15  10   13.14   10.70
   4 -15  11   26.51    6.90
   4 -15  11   24.53    6.80
  -4 -15 -11    8.94    9.33
   4  15  11   10.93    9.02
   4 -16 -13   -9.93    8.21
  -4 -16  13   -9.08    5.49
  -4 -16  13    0.64    6.65
   4  16 -13   -0.46    5.82
  -4  16  13    3.82    8.90
   4 -16 -12  109.90   12.13
  -4 -16  12  123.20    9.87
  -4 -16  12  122.30    9.53
   4  16 -12  123.30   10.01
  -4  16  12  128.80   12.46
   4 -16 -11   -4.45    9.63
  -4 -16  11   14.15    7.72
  -4 -16  11   10.87    7.02
   4  16 -11   17.76    7.32
  -4  16  11   15.53    9.94
   4 -16 -10   16.62   10.52
  -4 -16  10    8.94    8.03
  -4 -16  10    9.13    7.42
   4  16 -10   -2.37    7.46
  -4  16  10    1.98   11.21
   4 -16  -9   -2.45    9.24
  -4 -16   9   -0.04    7.97
  -4 -16   9   -3.55    7.30
   4  16  -9    0.99    8.06
  -4  16   9   -0.21   10.00
   4 -16  -8   24.36   10.43
  -4 -16   8   28.81    8.47
  -4 -16   8   34.34    8.24
   4  16  -8   23.14    8.01
  -4  16   8   27.67   11.88
   4 -16  -7   29.53   10.68
  -4 -16   7   11.81    8.72
  -4 -16   7   17.58    8.89
  -4  16   7   11.15   11.47
   4 -16  -6    8.44   10.23
  -4 -16   6   26.02    8.68
  -4 -16   6   15.22    8.46
  -4  16   6   27.15   11.67
   4 -16  -5   77.68   11.28
  -4 -16   5   80.33    9.77
  -4 -16   5   67.90    8.63
  -4  16   5   81.27   11.60
   4 -16  -4  995.20   51.86
  -4 -16   4  969.00   49.79
  -4 -16   4 1017.00   51.73
  -4  16   4  919.50   47.93
   4 -16  -3   72.96   10.71
  -4 -16   3   89.49   10.05
  -4 -16   3  105.50   12.15
  -4  16   3   65.28   11.67
   4 -16  -2    9.10   10.29
  -4 -16   2   10.52    8.41
  -4 -16   2   25.27    9.21
  -4  16   2    0.62   11.31
   4 -16  -1    7.42    9.98
  -4 -16   1    9.57    7.81
  -4 -16   1   14.49    9.30
   4  16  -1    2.36    8.80
  -4  16   1   -2.58   11.12
   4 -16   0   48.85   10.64
  -4 -16   0   51.36    9.61
   4  16   0   57.74    9.66
  -4  16   0   57.82   11.84
   4 -16   1  141.10   13.15
  -4 -16  -1   98.17   11.64
   4  16   1  124.60   10.99
  -4  16  -1  133.90   13.21
   4 -16   2  315.80   19.65
   4 -16   2  299.10   19.46
  -4 -16  -2  370.40   21.45
   4  16   2  316.60   18.62
  -4  16  -2  286.00   18.34
   4 -16   3   30.27    9.91
   4 -16   3    9.20    9.42
  -4 -16  -3   16.99    9.48
   4  16   3    9.47    9.13
   4 -16   4  188.30   15.02
   4 -16   4  189.70   13.96
  -4 -16  -4  206.70   14.96
   4  16   4  198.00   14.84
   4 -16   5   56.34   10.21
   4 -16   5   17.49    8.02
  -4 -16  -5   37.27   10.22
   4  16   5   41.75   10.04
   4 -16   6   33.18    7.94
   4 -16   6   40.90    8.67
  -4 -16  -6   43.96   10.67
   4  16   6   40.76    8.75
   4 -16   7   -5.00    7.60
   4 -16   7    6.28    8.76
  -4 -16  -7    8.81   10.71
   4  16   7    2.84    8.96
   4 -16   8   27.57    8.57
   4 -16   8   30.31    7.73
  -4 -16  -8   48.05   12.07
   4  16   8   14.19    8.84
   4 -16   9   -1.42    6.88
   4 -16   9    7.84    6.95
  -4 -16  -9    0.47   11.00
   4  16   9   21.01    9.51
   4 -16  10  147.40   10.91
   4 -16  10  159.00   11.12
  -4 -16 -10  146.30   14.40
   4  16  10  119.20   12.28
   4 -16  11   18.57    6.64
   4 -16  11   13.02    6.68
  -4 -16 -11  -10.97   10.13
   4  16  11    3.53    8.82
   4 -17 -13   -8.16    8.17
  -4 -17  13   -9.74    6.57
  -4 -17  13   -3.86    4.83
   4  17 -13   -1.46    5.66
  -4  17  13  -14.27    9.59
   4 -17 -12   -3.35    9.50
  -4 -17  12    6.31    6.55
  -4 -17  12    2.22    6.29
   4  17 -12   -2.53    6.59
  -4  17  12    7.12    9.84
   4 -17 -11   99.04   11.58
  -4 -17  11   92.30    9.30
  -4 -17  11   83.70    8.90
   4  17 -11   89.25    8.90
  -4  17  11   87.41   11.48
   4 -17 -10   11.39   10.32
  -4 -17  10    2.62    7.35
  -4 -17  10   12.71    7.85
   4  17 -10   14.71    7.42
  -4  17  10    8.60   10.67
   4 -17  -9    5.09    9.14
  -4 -17   9    4.78    7.83
  -4 -17   9    3.27    6.79
  -4  17   9   22.41   11.32
   4 -17  -8   39.14   10.30
  -4 -17   8   18.68    8.57
  -4 -17   8   22.75    8.14
  -4  17   8   19.14   11.46
[truncated: 753,661 more chars]
